# Supplementary material for: Quantitative investigation of human cell surface N-glycoprotein dynamics
Source: Royal Society of Chemistry journal article supplement (doi:10.1039/c6sc01814a), 2016-08-15
Supplement: c6sc01814a2.xlsx [file c6sc01814a2.xlsx]

## Sheet: CD proteins
Table S10 - The Half-Lives of 62 Quantified CDs in Expt# 1 & 2
Uniprot ID	Gene Symbol	CD Name	Half-Life in Expt# 1 (h)	Half-Life in Expt# 2 (h)	Median Half-Life (h)	Unique Glycopeptide Hits	Annotation
P15260	IFNGR1	CD119	3.75	3.35	3.55	1	INGR1_HUMAN Interferon gamma receptor 1
O14786	NRP1	CD304	5.16	5.52	5.34	2	NRP1_HUMAN Neuropilin-1
Q08334	IL10RB	CDw210b	5.03	5.67	5.35	1	I10R2_HUMAN Interleukin-10 receptor subunit beta
P11362	FGFR1	CD331	5.47	N/A	5.47	1	FGFR1_HUMAN Fibroblast growth factor receptor 1
P78504	JAG1	CD339	8.15	5.59	6.87	1	JAG1_HUMAN Protein jagged-1
P50895	BCAM	CD239	8.42	6.66	7.54	1	BCAM_HUMAN Basal cell adhesion molecule
P19438	TNFRSF1A	CD120a	N/A	8.23	8.23	1	TNR1A_HUMAN Tumor necrosis factor receptor superfamily member 1A
Q6YHK3	CD109	CD109	7.73	9.08	8.4	2	CD109_HUMAN CD109 antigen
Q92854	SEMA4D	CD100	9.71	8.24	8.97	1	SEM4D_HUMAN Semaphorin-4D
Q9P2B2	PTGFRN	CD315	10.55	9.41	9.98	5	FPRP_HUMAN Prostaglandin F2 receptor negative regulator
P16070	CD44	CD44	11.29	N/A	11.29	3	CD44_HUMAN CD44 antigen
P08069	IGF1R	CD221	11.46	13.76	12.61	7	IGF1R_HUMAN Insulin-like growth factor 1 receptor
P48960	CD97	CD97	16.49	9.91	13.2	5	CD97_HUMAN CD97 antigen
P32004	L1CAM	CD171	11.29	15.57	13.43	3	L1CAM_HUMAN Neural cell adhesion molecule L1
P04156	PRNP	CD230	13.7	13.87	13.79	2	PRIO_HUMAN Major prion protein
P35613	BSG	CD147	14.41	13.43	13.92	5	BASI_HUMAN Basigin
P11717	IGF2R	CD222	14.86	13.4	14.13	1	MPRI_HUMAN Cation-independent mannose-6-phosphate receptor
P16422	EPCAM	CD326	16.4	12.51	14.46	3	EPCAM_HUMAN Epithelial cell adhesion molecule
P06756	ITGAV	CD51	14.52	14.97	14.75	6	ITAV_HUMAN Integrin alpha-V
O60603	TLR2	CD282	14.92	N/A	14.92	1	TLR2_HUMAN Toll-like receptor 2
P13987	CD59	CD59	N/A	15.28	15.28	1	CD59_HUMAN CD59 glycoprotein
P40189	IL6ST	CD130	15.88	14.75	15.31	3	IL6RB_HUMAN Interleukin-6 receptor subunit beta
Q03405	PLAUR	CD87	16.55	17.75	17.15	1	UPAR_HUMAN Urokinase plasminogen activator surface receptor
Q07954	LRP1	CD91	19.49	15.91	17.7	4	LRP1_HUMAN Prolow-density lipoprotein receptor-related protein 1
P06731	CEACAM5	CD66e	17.88	18.14	18.01	7	CEAM5_HUMAN Carcinoembryonic antigen-related cell adhesion molecule 5
P02786	TFRC	CD71	20.39	16.29	18.34	5	TFR1_HUMAN Transferrin receptor protein 1
P19256	CD58	CD58	21.71	15.96	18.83	2	LFA3_HUMAN Lymphocyte function-associated antigen 3
Q5ZPR3	CD276	CD276	18.59	19.46	19.02	5	CD276_HUMAN CD276 antigen
P06213	INSR	CD220	16.05	23.14	19.6	1	INSR_HUMAN Insulin receptor
P08648	ITGA5	CD49e	19.86	19.79	19.82	4	ITA5_HUMAN Integrin alpha-5
Q15223	PVRL1	CD111	19.84	19.83	19.84	4	PVRL1_HUMAN Poliovirus receptor-related protein 1
P16144	ITGB4	CD104	19.9	21.76	20.83	1	ITB4_HUMAN Integrin beta-4
P23229	ITGA6	CD49f	17.83	24.83	21.33	2	ITA6_HUMAN Integrin alpha-6
O14672	ADAM10	CD156c	22.42	21.55	21.98	1	ADA10_HUMAN Disintegrin and metalloproteinase domain-containing protein 10
P05362	ICAM1	CD54	22.68	22.4	22.54	3	ICAM1_HUMAN Intercellular adhesion molecule 1
P22413	ENPP1	CD203a	25.21	20.08	22.64	4	ENPP1_HUMAN Ectonucleotide pyrophosphatase/phosphodiesterase family member 1
P17301	ITGA2	CD49b	27.76	18.19	22.98	5	ITA2_HUMAN Integrin alpha-2
P21589	NT5E	CD73	26.08	21.86	23.97	3	5NTD_HUMAN 5'-nucleotidase
P08962	CD63	CD63	22.6	25.73	24.16	1	CD63_HUMAN CD63 antigen
P05556	ITGB1	CD29	20.62	27.76	24.19	12	ITB1_HUMAN Integrin beta-1
P08195	SLC3A2	CD98	29.26	25.05	27.15	4	4F2_HUMAN 4F2 cell-surface antigen heavy chain
P26006	ITGA3	CD49c	35.32	39.22	37.27	6	ITA3_HUMAN Integrin alpha-3
P25445	FAS	CD95	45.16	33.06	39.11	1	TNR6_HUMAN Tumor necrosis factor receptor superfamily member 6
P15151	PVR	CD155	58.65	N/A	58.65	1	PVR_HUMAN Poliovirus receptor
P54709	ATP1B3	CD298	64.66	57.59	61.12	4	AT1B3_HUMAN Sodium/potassium-transporting ATPase subunit beta-3
P21926	CD9	CD9	N/A	61.73	61.73	1	CD9_HUMAN CD9 antigen
P78552	IL13RA1	CD213a1	N/A	62.41	62.41	1	I13R1_HUMAN Interleukin-13 receptor subunit alpha-1
P08473	MME	CD10	94.42	68.1	81.26	1	NEP_HUMAN Neprilysin
Q08722	CD47	CD47	92.4	73.5	82.95	3	CD47_HUMAN Leukocyte surface antigen CD47
Q12913	PTPRJ	CD148	106.28	108.82	107.55	4	PTPRJ_HUMAN Receptor-type tyrosine-protein phosphatase eta
O75144	ICOSLG	CD275	108.24	108.18	108.21	2	ICOSL_HUMAN ICOS ligand
P48509	CD151	CD151	111.12	N/A	111.12	2	CD151_HUMAN CD151 antigen
P78536	ADAM17	CD156b	115.34	110.05	112.7	5	ADA17_HUMAN Disintegrin and metalloproteinase domain-containing protein 17
P11279	LAMP1	CD107a	124.11	110.17	117.14	4	LAMP1_HUMAN Lysosome-associated membrane glycoprotein 1
P21802	FGFR2	CD332	N/A	154.81	154.81	1	FGFR2_HUMAN Fibroblast growth factor receptor 2
P12821	ACE	CD143	>200	>200	>200	2	ACE_HUMAN Angiotensin-converting enzyme
P08174	CD55	CD55	>200	>200	>200	2	DAF_HUMAN Complement decay-accelerating factor
P04626	ERBB2	CD340	>200	>200	>200	2	ERBB2_HUMAN Receptor tyrosine-protein kinase erbB-2
P13473	LAMP2	CD107b	>200	>200	>200	4	LAMP2_HUMAN Lysosome-associated membrane glycoprotein 2
Q8WWI5	SLC44A1	CD92	N/A	>200	>200	1	CTL1_HUMAN Choline transporter-like protein 1
O15455	TLR3	CD283	N/A	>200	>200	1	TLR3_HUMAN Toll-like receptor 3
P27701	CD82	CD82	>200	N/A	>200	1	CD82_HUMAN CD82 antigen
