# Supplementary material for: Quantitative investigation of human cell surface N-glycoprotein dynamics
Source: Royal Society of Chemistry journal article supplement (doi:10.1039/c6sc01814a), 2016-08-15
Supplement: c6sc01814a3.xlsx [file c6sc01814a3.xlsx]

## Sheet: Sheet1
Table S11 - The Half-Lives of Quantified Cell-Surface N-Glycoproteins with Catalytic Activities (Receptor-type tyrosine kinases and phosphatases are not included)
Uniprot ID	Gene Symbol	Half-Lives (h) of Glycoproteins in the Current Work	Half-Lives (h) of Proteins in the Previous Work (Ref. 59 in the text)	Annotation
O14494	PPAP2A	113.14		Lipid phosphate phosphohydrolase 1
O14672	ADAM10	21.98		Disintegrin and metalloproteinase domain-containing protein 10
O43688	PPAP2C	48.15		Lipid phosphate phosphohydrolase 2
P04406	GAPDH	>200	10.3842	Glyceraldehyde-3-phosphate dehydrogenase
P06280	GLA	>200		Alpha-galactosidase A
P07339	CTSD	>200	8.64705	Cathepsin D (acid protease active)
P08473	MME	81.26		Neprilysin (metalloprotease)
P12821	ACE	>200		Angiotensin-converting enzyme
P21589	NT5E	23.97		5'-nucleotidase
P22413	ENPP1	22.64		Ectonucleotide pyrophosphatase/phosphodiesterase family member 1
P42892	ECE1	22.93		Endothelin-converting enzyme 1
P78536	ADAM17	112.7		Disintegrin and metalloproteinase domain-containing protein 17
Q5MY95	ENTPD8	57.01		Ectonucleoside triphosphate diphosphohydrolase 8
Q8TCJ2	STT3B	40		Dolichyl-diphosphooligosaccharide--protein glycosyltransferase subunit STT3B
Q9UHG3	PCYOX1	17.68	7.29168	Prenylcysteine oxidase 1
Q9UJ14	GGT7	15.72		Gamma-glutamyltransferase 7
Q9Y5Y6	ST14	9.74		Suppressor of tumorigenicity 14 protein (trypsin-like activity)
