# Supplementary material for: Quantitative investigation of human cell surface N-glycoprotein dynamics
Source: Royal Society of Chemistry journal article supplement (doi:10.1039/c6sc01814a), 2016-08-15
Supplement: c6sc01814a4.xlsx [file c6sc01814a4.xlsx]

## Sheet: Sites Identified
Table S1 - Unique N-Glycosylation Sites (449 Sites) Identified on 233 Surface Glycoproteins in Expt# 1
Uniprot ID	Gene Symbol	Site	ModScore	ModScore Peptide	PPM	XCorr	Annotation
A1A5B4	ANO9	641	1000	K.EGN#STVDCLK.G	4.87	3.32	ANO9_HUMAN Anoctamin-9
A8MVW0	FAM171A2	66	1000	R.ASVDVFGN#R.T	10.03	2.054	F1712_HUMAN Protein FAM171A2
F2Z333	C1orf233	109	1000	R.AFALN#CSWR.G	-0.48	3.091	CA233_HUMAN Fibronectin type-III domain-containing transmembrane protein C1orf233
O14494	PPAP2A	142	1000	K.IN#CSDGYIEYYICR.G	0.96	3.337	LPP1_HUMAN Lipid phosphate phosphohydrolase 1
O14497	ARID1A	1308	0.524	R.TEPGIGPEGNMSTGAPQPN#LMPSN#PDSGMYSPSR.Y	-2.32	1.129	ARI1A_HUMAN AT-rich interactive domain-containing protein 1A
O14497	ARID1A	1313	0.497	R.TEPGIGPEGNMSTGAPQPN#LMPSN#PDSGMYSPSR.Y	-2.32	1.129	ARI1A_HUMAN AT-rich interactive domain-containing protein 1A
O14672	ADAM10	439	1000	R.N#ISQVLEK.K	-3.2	2.697	ADA10_HUMAN Disintegrin and metalloproteinase domain-containing protein 10
O14786	NRP1	150	1000	K.RGPECSQN#YTTPSGVIK.S	6.78	3.178	NRP1_HUMAN Neuropilin-1
O14786	NRP1	522	24.437	K.IGYSNN#GSDWK.M	-13.08	3.114	NRP1_HUMAN Neuropilin-1
O15031	PLXNB2	127	1000	R.ALSN#ISLR.L	-0.63	3.021	PLXB2_HUMAN Plexin-B2
O15031	PLXNB2	391	114.968	R.GGLN#LTAVTVAAEN#NHTVAFLGTSDGR.I	0.87	8.055	PLXB2_HUMAN Plexin-B2
O15031	PLXNB2	401	6.591	R.GGLN#LTAVTVAAEN#NHTVAFLGTSDGR.I	0.87	8.055	PLXB2_HUMAN Plexin-B2
O15031	PLXNB2	528	1000	K.SCVAVTSAQPQN#MSR.R	9.26	3.729	PLXB2_HUMAN Plexin-B2
O15031	PLXNB2	733	1000	K.LSHDAN#ETLPLHLYVK.S	-1.48	5.33	PLXB2_HUMAN Plexin-B2
O15031	PLXNB2	844	1000	R.ISVAGRN#CSFQPER.Y	2.87	4.545	PLXB2_HUMAN Plexin-B2
O15031	PLXNB2	1049	1000	R.EAESLQPM*TVVGTDYVFHN#DTK.V	2.04	4.091	PLXB2_HUMAN Plexin-B2
O15230	LAMA5	2196	1000	R.GIN#ASSMAWAR.L	5.01	3.098	LAMA5_HUMAN Laminin subunit alpha-5
O15230	LAMA5	3107	1000	K.RLN#TTGVSAGCTADLLVGR.A	2.33	3.989	LAMA5_HUMAN Laminin subunit alpha-5
O15393	TMPRSS2	213	22.492	K.LN#TSAGNVDIYKK.L	4.03	1.952	TMPS2_HUMAN Transmembrane protease serine 2
O15394	NCAM2	219	1000	K.SFN#ATAERGEEMTFSCR.A	-0.59	5.675	NCAM2_HUMAN Neural cell adhesion molecule 2
O15394	NCAM2	474	12.497	K.M*ILEIAPTSDNDFGRYN#CTATNHIGTR.F	0.24	4.667	NCAM2_HUMAN Neural cell adhesion molecule 2
O15394	NCAM2	562	18.805	R.SHGVQTM*VVLNNLEPN#TTYEIR.V	4.97	5.084	NCAM2_HUMAN Neural cell adhesion molecule 2
O43157	PLXNB1	1253	1000	K.YTLDPN#ITSAGPTK.S	1.88	1.243	PLXB1_HUMAN Plexin-B1
O43194	GPR39	192	1000	R.GLTCN#R.S	-0.81	2.149	GPR39_HUMAN G-protein coupled receptor 39
O60487	MPZL2	39	1000	R.VLEAVN#GTDAR.L	4.46	4.084	MPZL2_HUMAN Myelin protein zero-like protein 2
O60603	TLR2	414	73.311	K.N#LTNIDISK.N	4.33	2.972	TLR2_HUMAN Toll-like receptor 2
O60637	TSPAN3	127	37.54	K.TYN#GTNPDAASR.A	-0.81	2.461	TSN3_HUMAN Tetraspanin-3
O60637	TSPAN3	167	1000	K.N#QSVPLSCCR.E	-0.74	1.2	TSN3_HUMAN Tetraspanin-3
O60896	RAMP3	103	1000	R.QFFSN#CTVDR.V	-7.05	3.077	RAMP3_HUMAN Receptor activity-modifying protein 3
O75054	IGSF3	101	1000	R.VQGN#STLLHITDLQAR.D	1.69	4.761	IGSF3_HUMAN Immunoglobulin superfamily member 3
O75054	IGSF3	655	24.437	K.NYN#NTWTR.L	-0.53	2.341	IGSF3_HUMAN Immunoglobulin superfamily member 3
O75054	IGSF3	700	52.725	K.RTLTLVENKPIQLN#CSVK.S	-1.11	6.579	IGSF3_HUMAN Immunoglobulin superfamily member 3
O75054	IGSF3	825	1000	R.LSQAQGN#LSVLETR.Q	0.43	4.865	IGSF3_HUMAN Immunoglobulin superfamily member 3
O75054	IGSF3	842	1000	R.QVQLECVVLN#R.T	-0.47	3.983	IGSF3_HUMAN Immunoglobulin superfamily member 3
O75144	ICOSLG	70	22.492	K.TVVTYHIPQN#SSLENVDSR.Y	4.39	3.87	ICOSL_HUMAN ICOS ligand
O75144	ICOSLG	102	1000	R.LFN#VTPQDEQK.F	-0.21	2.799	ICOSL_HUMAN ICOS ligand
O75882	ATRN	914	16.964	K.AATCINPLN#GSVCERPAN#HSAK.Q	3.14	4.021	ATRN_HUMAN Attractin
O75882	ATRN	923	29.973	K.AATCINPLN#GSVCERPAN#HSAK.Q	3.14	4.021	ATRN_HUMAN Attractin
O75882	ATRN	1073	1000	K.CIN#QSICEK.C	-4.56	2.684	ATRN_HUMAN Attractin
O75882	ATRN	1082	1000	K.CEN#LTTGK.H	-2.24	2.131	ATRN_HUMAN Attractin
O75954	TSPAN9	180	1000	R.N#ATTPLWR.T	-9.63	1.138	TSN9_HUMAN Tetraspanin-9
O76082	SLC22A5	57	1000	R.CRVPDAAN#LSSAWR.N	-2.27	4.922	S22A5_HUMAN Solute carrier family 22 member 5
O76082	SLC22A5	91	1000	R.LATIAN#FSALGLEPGR.D	2.93	4.507	S22A5_HUMAN Solute carrier family 22 member 5
O94805	ACTL6B	159	1000	K.TAVLTAFAN#GR.S	-1.78	2.845	ACL6B_HUMAN Actin-like protein 6B
O95084	PRSS23	207	1000	R.GAN#DSTSAMPEQMK.F	-1.72	2.516	PRS23_HUMAN Serine protease 23
O95136	S1PR2	19	1000	K.VQEHYN#YTK.E	-2.51	2.909	S1PR2_HUMAN Sphingosine 1-phosphate receptor 2
O95274	LYPD3	163	1000	R.EACQGTSPPVVSCYN#ASDHVYK.G	-5.27	3.541	LYPD3_HUMAN Ly6/PLAUR domain-containing protein 3
O95274	LYPD3	176	1000	K.GCFDGN#VTLTAAN#VTVSLPVR.G	-0.13	6.409	LYPD3_HUMAN Ly6/PLAUR domain-containing protein 3
O95274	LYPD3	183	1000	K.GCFDGN#VTLTAAN#VTVSLPVR.G	-0.13	6.409	LYPD3_HUMAN Ly6/PLAUR domain-containing protein 3
O95274	LYPD3	227	39.663	R.CNSDLRN#K.T	0.2	1.911	LYPD3_HUMAN Ly6/PLAUR domain-containing protein 3
O95297	MPZL1	50	1000	K.EIFVAN#GTQGK.L	-5.06	3.601	MPZL1_HUMAN Myelin protein zero-like protein 1
O95857	TSPAN13	137	17.009	R.SVNPN#DTCLASCVK.S	-3.25	2.964	TSN13_HUMAN Tetraspanin-13
O95858	TSPAN15	189	71.753	R.N#TTEVVNTMCGYK.T	0.99	3.541	TSN15_HUMAN Tetraspanin-15
P01892	HLA-A	110	1000	R.GYYN#QSEAGSHTVQR.M	-1.21	1.159	1A02_HUMAN HLA class I histocompatibility antigen, A-2 alpha chain
P02786	TFRC	251	1000	K.DFEDLYTPVN#GSIVIVR.A	0.56	2.965	TFR1_HUMAN Transferrin receptor protein 1
P02786	TFRC	722	9.34	K.QN#NGAFN#ETLFR.N	4.4	1.891	TFR1_HUMAN Transferrin receptor protein 1
P02786	TFRC	723	24.437	K.QNN#GAFN#ETLFR.N	-0.16	3.645	TFR1_HUMAN Transferrin receptor protein 1
P02786	TFRC	727	84.609	R.KQNNGAFN#ETLFR.N	1.25	5.659	TFR1_HUMAN Transferrin receptor protein 1
P04156	PRNP	197	1000	K.QHTVTTTTKGEN#FTETDVK.M	6.35	2.63	PRIO_HUMAN Major prion protein
P04406	GAPDH	9	1000	K.VGVN#GFGR.I	-0.2	2.949	G3P_HUMAN Glyceraldehyde-3-phosphate dehydrogenase
P04406	GAPDH	225	1000	K.VIPELN#GK.L	0.87	2.563	G3P_HUMAN Glyceraldehyde-3-phosphate dehydrogenase
P04626	ERBB2	530	1000	R.GHCWGPGPTQCVN#CSQFLR.G	-2.68	5.416	ERBB2_HUMAN Receptor tyrosine-protein kinase erbB-2
P04626	ERBB2	571	1000	R.HCLPCHPECQPQN#GSVTCFGPEADQCVACAHYKDPPFCVAR.C	0.97	2.19	ERBB2_HUMAN Receptor tyrosine-protein kinase erbB-2
P04626	ERBB2	629	1000	K.FPDEEGACQPCPIN#CTHSCVDLDDK.G	10.19	1.808	ERBB2_HUMAN Receptor tyrosine-protein kinase erbB-2
P05026	ATP1B1	158	71.949	R.FKLEWLGN#CSGLNDETYGYK.E	-0.12	6.447	AT1B1_HUMAN Sodium/potassium-transporting ATPase subunit beta-1
P05026	ATP1B1	193	1000	R.VLGFKPKPPKN#ESLETYPVMK.Y	-0.71	4.285	AT1B1_HUMAN Sodium/potassium-transporting ATPase subunit beta-1
P05362	ICAM1	145	1000	R.AN#LTVVLLRGEK.E	-1.47	3.902	ICAM1_HUMAN Intercellular adhesion molecule 1
P05362	ICAM1	267	78.156	R.LNPTVTYGN#DSFSAK.A	4.86	3.526	ICAM1_HUMAN Intercellular adhesion molecule 1
P05556	ITGB1	205	3.119	K.LRN#PCTSEQNCTSPFSYK.N	-0.96	2.176	ITB1_HUMAN Integrin beta-1
P05556	ITGB1	212	67.169	K.LRNPCTSEQN#CTSPFSYK.N	0.64	5.07	ITB1_HUMAN Integrin beta-1
P05556	ITGB1	406	73.311	K.NGVN#GTGENGR.K	-0.07	4.846	ITB1_HUMAN Integrin beta-1
P05556	ITGB1	411	132.105	K.NGVN#GTGEN#GR.K	-0.26	3.854	ITB1_HUMAN Integrin beta-1
P05556	ITGB1	481	1000	K.CHEGN#GTFECGACR.C	-0.14	5.269	ITB1_HUMAN Integrin beta-1
P05556	ITGB1	520	107.317	R.KEN#SSEICSNNGECVCGQCVCR.K	8.68	4.45	ITB1_HUMAN Integrin beta-1
P05556	ITGB1	669	1000	K.KDTCTQECSYFN#ITK.V	3.25	5.362	ITB1_HUMAN Integrin beta-1
P06213	INSR	920	1000	R.GLSPGN#YSVR.I	7.37	3.279	INSR_HUMAN Insulin receptor
P06731	CEACAM5	152	13.38	R.VYPELPKPSISSN#NSKPVEDK.D	8.01	3.354	CEAM5_HUMAN Carcinoembryonic antigen-related cell adhesion molecule 5
P06731	CEACAM5	195	1000	R.LQLSN#GN#R.T	-1.16	1.866	CEAM5_HUMAN Carcinoembryonic antigen-related cell adhesion molecule 5
P06731	CEACAM5	197	1000	R.LQLSN#GN#R.T	-1.16	1.866	CEAM5_HUMAN Carcinoembryonic antigen-related cell adhesion molecule 5
P06731	CEACAM5	204	1000	R.TLTLFN#VTR.N	0.34	4.171	CEAM5_HUMAN Carcinoembryonic antigen-related cell adhesion molecule 5
P06731	CEACAM5	375	17.009	R.LQLSNDN#R.T	-0.55	1.819	CEAM5_HUMAN Carcinoembryonic antigen-related cell adhesion molecule 5
P06731	CEACAM5	508	27.055	K.TITVSAELPKPSISSN#NSKPVEDK.D	7.27	7.008	CEAM5_HUMAN Carcinoembryonic antigen-related cell adhesion molecule 5
P06731	CEACAM5	580	9.296	R.AYVCGIQNSVSAN#R.S	10.96	2.528	CEAM5_HUMAN Carcinoembryonic antigen-related cell adhesion molecule 5
P06731	CEACAM5	650	7.71	K.ITPNNN#GTYACFVSNLATGRN#NSIVK.S	-0.78	6.429	CEAM5_HUMAN Carcinoembryonic antigen-related cell adhesion molecule 5
P06731	CEACAM5	665	7.71	K.ITPNNN#GTYACFVSNLATGRN#NSIVK.S	-0.78	6.429	CEAM5_HUMAN Carcinoembryonic antigen-related cell adhesion molecule 5
P06756	ITGAV	74	1000	K.AN#TTQPGIVEGGQVLK.C	0.39	2.69	ITAV_HUMAN Integrin alpha-V
P06756	ITGAV	554	1000	K.N#MTISR.G	-0.37	2.585	ITAV_HUMAN Integrin alpha-V
P06756	ITGAV	704	1000	K.TEN#QTR.Q	-0.18	1.754	ITAV_HUMAN Integrin alpha-V
P06756	ITGAV	874	1000	K.ISSLQTTEKN#DTVAGQGER.D	-4.45	3.974	ITAV_HUMAN Integrin alpha-V
P06756	ITGAV	945	11.015	K.ENQN#HSYSLK.S	-0.52	2.069	ITAV_HUMAN Integrin alpha-V
P07339	CTSD	263	1000	K.GSLSYLN#VTRK.A	-7.28	3.467	CATD_HUMAN_contaminant Cathepsin D
P07602	PSAP	101	1000	K.TCDWLPKPN#MSASCK.E	-1.57	2.393	SAP_HUMAN Prosaposin
P08069	IGF1R	244	60.093	K.RACTENNECCHPECLGSCSAPDN#DTACVACR.H	-0.4	6.366	IGF1R_HUMAN Insulin-like growth factor 1 receptor
P08069	IGF1R	314	1000	R.N#GSQSMYCIPCEGPCPK.V	2.13	1.251	IGF1R_HUMAN Insulin-like growth factor 1 receptor
P08069	IGF1R	640	6.591	K.WNPPSLPNGN#LSYYIVR.W	0.54	4.138	IGF1R_HUMAN Insulin-like growth factor 1 receptor
P08069	IGF1R	747	1000	R.DVMQVAN#TTMSSR.S	0.7	3.433	IGF1R_HUMAN Insulin-like growth factor 1 receptor
P08069	IGF1R	900	53.534	R.LNPGN#YTAR.I	-4.85	2.671	IGF1R_HUMAN Insulin-like growth factor 1 receptor
P08069	IGF1R	913	1000	R.IQATSLSGN#GSWTDPVFFYVQAK.T	0.49	3.242	IGF1R_HUMAN Insulin-like growth factor 1 receptor
P08174	CD55	95	1000	K.GSQWSDIEEFCN#RSCEVPTR.L	1.05	3.758	DAF_HUMAN Complement decay-accelerating factor
P08195	SLC3A2	365	1000	K.DASSFLAEWQN#ITK.G	-1.51	2.182	4F2_HUMAN 4F2 cell-surface antigen heavy chain
P08195	SLC3A2	381	106.4	K.GFSEDRLLIAGTN#SSDLQQILSLLESNK.D	0.01	6.299	4F2_HUMAN 4F2 cell-surface antigen heavy chain
P08195	SLC3A2	424	44.278	K.SLVTQYLN#ATGNR.W	-0.99	4.423	4F2_HUMAN 4F2 cell-surface antigen heavy chain
P08473	MME	145	1000	R.SCIN#ESAIDSR.G	1.15	2.095	NEP_HUMAN Neprilysin
P08648	ITGA5	297	1000	K.GN#LTYGYVTILN#GSDIR.S	-0.56	4.628	ITA5_HUMAN Integrin alpha-5
P08648	ITGA5	307	1000	K.GN#LTYGYVTILN#GSDIR.S	-0.56	4.628	ITA5_HUMAN Integrin alpha-5
P08648	ITGA5	593	1000	K.IYLRN#ESEFRDK.L	1.74	3.964	ITA5_HUMAN Integrin alpha-5
P08648	ITGA5	773	24.437	K.NLN#NSQSDVVSFR.L	3.55	3.183	ITA5_HUMAN Integrin alpha-5
P08648	ITGA5	868	27.121	R.VTGLN#CTTNHPINPK.G	-7.51	3.319	ITA5_HUMAN Integrin alpha-5
P08962	CD63	130	9.34	K.NN#HTASILDR.M	-7.35	3.243	CD63_HUMAN CD63 antigen
P09603	CSF1	154	13.38	K.NVFN#ETK.N	5.52	1.23	CSF1_HUMAN Macrophage colony-stimulating factor 1
P09758	TACSTD2	120	61.56	K.ARQCN#QTSVCWCVNSVGVR.R	1.83	3.601	TACD2_HUMAN Tumor-associated calcium signal transducer 2
P09758	TACSTD2	168	1000	R.HRPTAGAFN#HSDLDAELR.R	-5.54	1.991	TACD2_HUMAN Tumor-associated calcium signal transducer 2
P09758	TACSTD2	208	1000	R.QN#TSQK.A	-0.46	2.491	TACD2_HUMAN Tumor-associated calcium signal transducer 2
P10586	PTPRF	966	64.398	R.DINSQQELQN#ITTDTR.F	3.21	3.248	PTPRF_HUMAN Receptor-type tyrosine-protein phosphatase F
P10909	CLU	86	1000	K.KKEDALN#ETRESETK.L	-0.98	1.687	CLUS_HUMAN Clusterin
P10909	CLU	291	1000	R.EIRHN#STGCLR.M	-0.41	2.335	CLUS_HUMAN Clusterin
P11047	LAMC1	1022	16.062	R.EGFVGNRCDQCEENYFYN#R.S	-13.98	2.337	LAMC1_HUMAN Laminin subunit gamma-1
P11047	LAMC1	1107	24.437	R.VN#NTLSSQISR.L	-4.47	3.113	LAMC1_HUMAN Laminin subunit gamma-1
P11047	LAMC1	1380	44.278	R.RVNDN#K.T	-0.1	2.963	LAMC1_HUMAN Laminin subunit gamma-1
P11047	LAMC1	1439	1000	K.N#ATSTK.A	0.3	2.415	LAMC1_HUMAN Laminin subunit gamma-1
P11166	SLC2A1	45	1000	K.VIEEFYN#QTWVHR.Y	-0.01	5.351	GTR1_HUMAN Solute carrier family 2, facilitated glucose transporter member 1
P11279	LAMP1	84	1000	R.SSCGKEN#TSDPSLVIAFGR.G	5.33	2.631	LAMP1_HUMAN Lysosome-associated membrane glycoprotein 1
P11279	LAMP1	103	1000	R.GHTLTLN#FTR.N	0.1	2.432	LAMP1_HUMAN Lysosome-associated membrane glycoprotein 1
P11279	LAMP1	249	1000	R.KDN#TTVTR.L	-1.02	2.566	LAMP1_HUMAN Lysosome-associated membrane glycoprotein 1
P11362	FGFR1	317	1000	K.TAGVN#TTDK.E	-4.51	1.335	FGFR1_HUMAN Fibroblast growth factor receptor 1
P11717	IGF2R	2085	1000	K.GYPCGGN#K.T	-6.38	1.725	MPRI_HUMAN Cation-independent mannose-6-phosphate receptor
P12821	ACE	146	84.359	K.RQQYNALLSN#MSR.I	-1.96	5.973	ACE_HUMAN Angiotensin-converting enzyme
P12821	ACE	695	39.663	K.NMQIAN#HTLK.Y	-7.84	2.8	ACE_HUMAN Angiotensin-converting enzyme
P13473	LAMP2	49	1000	K.WQM*N#FTVR.Y	-4.4	1.302	LAMP2_HUMAN Lysosome-associated membrane glycoprotein 2
P13473	LAMP2	58	1000	R.YETTN#K.T	-0.91	2.303	LAMP2_HUMAN Lysosome-associated membrane glycoprotein 2
P13473	LAMP2	275	1000	R.LN#SSTIK.Y	-0.04	2.856	LAMP2_HUMAN Lysosome-associated membrane glycoprotein 2
P13473	LAMP2	356	1000	R.VQPFN#VTQGK.Y	-1.67	2.371	LAMP2_HUMAN Lysosome-associated membrane glycoprotein 2
P15151	PVR	105	1000	R.LGAELRN#ASLR.M	2.42	2.456	PVR_HUMAN Poliovirus receptor
P15260	IFNGR1	179	1000	R.MN#GSEIQYK.I	4.66	2.612	INGR1_HUMAN Interferon gamma receptor 1
P16070	CD44	57	1000	K.AFN#STLPTM*AQMEK.A	6.9	2.535	CD44_HUMAN CD44 antigen
P16144	ITGB4	695	1000	R.CSFRDEDDDCTYSYTMEGDGAPGPN#STVLVHK.K	7.35	3.042	ITB4_HUMAN Integrin beta-4
P16422	EPCAM	74	1000	K.AEMN#GSK.L	-0.01	2.116	EPCAM_HUMAN Epithelial cell adhesion molecule
P16422	EPCAM	111	53.71	K.QCN#GTSMCWCVNTAGVR.R	1.09	2.588	EPCAM_HUMAN Epithelial cell adhesion molecule
P17181	IFNAR1	81	1000	K.LSGCQN#ITSTK.C	-0.21	2.264	INAR1_HUMAN Interferon alpha/beta receptor 1
P17181	IFNAR1	172	1000	K.N#SSGVEER.I	0.01	2.412	INAR1_HUMAN Interferon alpha/beta receptor 1
P17301	ITGA2	105	65.263	K.LNLQTSTSIPN#VTEM*K.T	-2.28	2.647	ITA2_HUMAN Integrin alpha-2
P17301	ITGA2	343	1000	R.YFFN#VSDEAALLEK.A	-0.29	2.934	ITA2_HUMAN Integrin alpha-2
P17301	ITGA2	460	35.803	R.AN#YTGQIVLYSVN#ENGNITVIQAHR.G	-0.63	3.442	ITA2_HUMAN Integrin alpha-2
P17301	ITGA2	471	2.017	R.AN#YTGQIVLYSVN#ENGNITVIQAHR.G	-0.63	3.442	ITA2_HUMAN Integrin alpha-2
P17301	ITGA2	475	4.085	R.AN#YTGQIVLYSVNENGN#ITVIQAHR.G	0.28	3.464	ITA2_HUMAN Integrin alpha-2
P17301	ITGA2	1057	1000	R.TASCSN#VTCWLK.D	-1.54	2.497	ITA2_HUMAN Integrin alpha-2
P18084	ITGB5	586	4.085	K.CHAGYIGDNCN#CSTDISTCR.G	0.17	3.199	ITB5_HUMAN Integrin beta-5
P18564	ITGB6	463	1000	K.EVEVN#SSK.C	-1.37	1.73	ITB6_HUMAN Integrin beta-6
P19256	CD58	169	1000	K.RN#STSIYFK.M	2.25	2.882	LFA3_HUMAN Lymphocyte function-associated antigen 3
P20645	M6PR	57	1000	K.RLKPLFN#K.S	-5.21	2.999	MPRD_HUMAN Cation-dependent mannose-6-phosphate receptor
P20645	M6PR	83	106.4	R.EAGN#HTSGAGLVQINK.S	-8.67	4.574	MPRD_HUMAN Cation-dependent mannose-6-phosphate receptor
P21589	NT5E	53	1000	K.CVN#ASR.C	-0.69	1.815	5NTD_HUMAN 5'-nucleotidase
P21589	NT5E	333	1000	K.LDN#YSTQELGK.T	-0.97	3.094	5NTD_HUMAN 5'-nucleotidase
P21860	ERBB3	437	48.874	K.NLN#VTSLGFR.S	-0.92	3.99	ERBB3_HUMAN Receptor tyrosine-protein kinase erbB-3
P21860	ERBB3	522	1000	K.VCDPLCSSGGCWGPGPGQCLSCRN#YSR.G	-2.16	2.42	ERBB3_HUMAN Receptor tyrosine-protein kinase erbB-3
P21860	ERBB3	616	5.07	K.YPDVQNECRPCHEN#CTQGCK.G	-0.36	2.047	ERBB3_HUMAN Receptor tyrosine-protein kinase erbB-3
P22223	CDH3	566	1000	R.QVLN#ITDK.D	1.39	3.322	CADH3_HUMAN Cadherin-3
P22413	ENPP1	285	1000	K.M*N#ASFSLK.S	-3.23	1.662	ENPP1_HUMAN Ectonucleotide pyrophosphatase/phosphodiesterase family member 1
P22413	ENPP1	341	1000	K.MYN#GSVPFEER.I	3.1	3.054	ENPP1_HUMAN Ectonucleotide pyrophosphatase/phosphodiesterase family member 1
P22413	ENPP1	477	16.265	R.N#LSCREPNQHFKPYLK.H	9.54	4.137	ENPP1_HUMAN Ectonucleotide pyrophosphatase/phosphodiesterase family member 1
P23229	ITGA6	770	12.092	K.QLSCVANQN#GSQADCELGNPFKR.N	-4.33	5.699	ITA6_HUMAN Integrin alpha-6
P23229	ITGA6	966	47.045	R.KYQTLN#CSVNVNCVNIR.C	3.98	2.426	ITA6_HUMAN Integrin alpha-6
P25106	ACKR3	192	9.34	K.TVTSASNN#ETYCR.S	-1.28	2.117	ACKR3_HUMAN Atypical chemokine receptor 3
P25445	FAS	136	36.701	R.CKPNFFCN#STVCEHCDPCTK.C	0.7	4.539	TNR6_HUMAN Tumor necrosis factor receptor superfamily member 6
P26006	ITGA3	265	1000	K.N#ITIVTGAPR.H	0.17	3.919	ITA3_HUMAN Integrin alpha-3
P26006	ITGA3	511	1000	R.RN#ITLAYTLEADRDR.R	-0.77	5.825	ITA3_HUMAN Integrin alpha-3
P26006	ITGA3	969	37.54	R.TSIPTINMEN#K.T	-2.3	2.883	ITA3_HUMAN Integrin alpha-3
P26012	ITGB8	466	42.19	R.N#CSCQCEDNRGPK.G	0.28	2.234	ITB8_HUMAN Integrin beta-8
P27701	CD82	198	1000	K.GFCEAPGN#R.T	-7.98	2.143	CD82_HUMAN CD82 antigen
P27824	CANX	156	2.185	K.LNKPFLFDTKPLIVQYEVNFQN#GIECGGAYVK.L	-0.39	3.89	CALX_HUMAN Calnexin
P29323	EPHB2	482	1000	K.ELSEYN#ATAIK.S	-5.29	3.002	EPHB2_HUMAN Ephrin type-B receptor 2
P30464	HLA-B	110	1000	R.GYYN#QSEAGSHTLQR.M	-0.29	4.116	1B15_HUMAN HLA class I histocompatibility antigen, B-15 alpha chain
P30825	SLC7A1	226	84.359	K.NWQLTEEDFGN#TSGR.L	-0.04	2.779	CTR1_HUMAN High affinity cationic amino acid transporter 1
P30825	SLC7A1	235	24.437	R.LCLNN#DTK.E	9.7	2.979	CTR1_HUMAN High affinity cationic amino acid transporter 1
P30988	CALCR	91	1000	R.MQQLPAYQGEGPYCN#R.T	1.49	2.27	CALCR_HUMAN Calcitonin receptor
P32004	L1CAM	294	20.167	R.VTYQNHN#K.T	-0.2	2.176	L1CAM_HUMAN Neural cell adhesion molecule L1
P32004	L1CAM	671	1000	K.VPGN#QTSTTLK.L	2.8	2.333	L1CAM_HUMAN Neural cell adhesion molecule L1
P32004	L1CAM	849	1000	R.GYN#VTYWR.E	1.3	3.412	L1CAM_HUMAN Neural cell adhesion molecule L1
P35052	GPC1	116	1000	R.SFDDHFQHLLN#DSER.T	5.22	4.966	GPC1_HUMAN Glypican-1
P35613	BSG	160	1000	K.ILLTCSLN#DSATEVTGHR.W	-1.22	1.304	BASI_HUMAN Basigin
P35613	BSG	268	1000	K.ALMN#GSESR.F	0.01	3.127	BASI_HUMAN Basigin
P35613	BSG	302	1000	R.CN#GTSSK.G	-7.03	2.641	BASI_HUMAN Basigin
P36941	LTBR	177	1000	K.AGHFQN#TSSPSAR.C	-7.83	1.642	TNR3_HUMAN Tumor necrosis factor receptor superfamily member 3
P40189	IL6ST	83	1000	K.EQYTIIN#R.T	-4.4	2.572	IL6RB_HUMAN Interleukin-6 receptor subunit beta
P40189	IL6ST	131	104.477	K.N#LSCIVNEGK.K	-3.76	2.57	IL6RB_HUMAN Interleukin-6 receptor subunit beta
P40189	IL6ST	379	1000	K.SHLQN#YTVN#ATK.L	4.99	2.858	IL6RB_HUMAN Interleukin-6 receptor subunit beta
P40189	IL6ST	383	1000	K.SHLQN#YTVN#ATK.L	4.99	2.858	IL6RB_HUMAN Interleukin-6 receptor subunit beta
P42892	ECE1	166	1000	K.HLLEN#STASVSEAERK.A	8.47	5.33	ECE1_HUMAN Endothelin-converting enzyme 1
P42892	ECE1	187	1000	R.ACM*N#ETRIEELR.A	-1.57	2.962	ECE1_HUMAN Endothelin-converting enzyme 1
P42892	ECE1	249	17.009	K.NSN#SNVIQVDQSGLGLPSR.D	-2.84	3.125	ECE1_HUMAN Endothelin-converting enzyme 1
P42892	ECE1	270	1000	R.DYYLN#K.T	-12.46	1.769	ECE1_HUMAN Endothelin-converting enzyme 1
P42892	ECE1	539	1000	R.FFN#FSWR.V	-1.47	3.214	ECE1_HUMAN Endothelin-converting enzyme 1
P42892	ECE1	632	1000	K.N#SSVEAFKR.Q	-10.34	1.519	ECE1_HUMAN Endothelin-converting enzyme 1
P42892	ECE1	651	20.985	K.RQTECMVEQYSN#YSVNGEPVNGR.H	-1.01	2.465	ECE1_HUMAN Endothelin-converting enzyme 1
P42892	ECE1	660	15.007	K.RQTECMVEQYSN#YSVNGEPVN#GR.H	-11.61	3.281	ECE1_HUMAN Endothelin-converting enzyme 1
P48509	CD151	159	5.085	K.RYHQPGHEAVTSAVDQLQQEFHCCGSN#NSQDWR.D	-0.48	3.721	CD151_HUMAN CD151 antigen
P48509	CD151	160	6.591	K.RYHQPGHEAVTSAVDQLQQEFHCCGSNN#SQDWR.D	0.46	3.773	CD151_HUMAN CD151 antigen
P48960	CD97	38	9.394	R.WCPQNSSCVN#ATACR.C	5.6	1.137	CD97_HUMAN CD97 antigen
P48960	CD97	108	38.371	K.TFKN#ESENTCQDVDECQQNPR.L	-8.25	4.643	CD97_HUMAN CD97 antigen
P48960	CD97	371	1000	R.GDKN#VTMGQSSAR.M	-0.06	3.775	CD97_HUMAN CD97 antigen
P50454	SERPINH1	120	1000	R.SLSN#STAR.N	-2.18	2.598	SERPH_HUMAN Serpin H1
P50895	BCAM	439	1000	R.TQN#FTLLVQGSPELK.T	-1.17	2.882	BCAM_HUMAN Basal cell adhesion molecule
P51795	CLCN5	405	7.971	K.LCDYEN#RFNTSK.G	3.12	3.37	CLCN5_HUMAN H(+)/Cl(-) exchange transporter 5
P51795	CLCN5	408	23.624	K.LCDYENRFN#TSK.G	3.49	3.888	CLCN5_HUMAN H(+)/Cl(-) exchange transporter 5
P51805	PLXNA3	59	1000	K.LAPN#LTELR.A	2.96	4.017	PLXA3_HUMAN Plexin-A3
P52569	SLC7A2	227	1000	K.N#ISASAR.E	-7.97	2.606	CTR2_HUMAN Low affinity cationic amino acid transporter 2
P52797	EFNA3	100	1000	R.TCN#ASQGFKR.W	-2.16	2.606	EFNA3_HUMAN Ephrin-A3
P53801	PTTG1IP	54	78.156	K.N#VSCLWCNTNK.A	1.51	2.687	PTTG_HUMAN Pituitary tumor-transforming gene 1 protein-interacting protein
P54709	ATP1B3	124	1000	K.FLKPYTLEEQKN#LTVCPDGALFEQK.G	-3.07	5.567	AT1B3_HUMAN Sodium/potassium-transporting ATPase subunit beta-3
P54709	ATP1B3	240	7.71	K.KLHVGYLQPLVAVQVSFAPN#NTGK.E	0.29	4.979	AT1B3_HUMAN Sodium/potassium-transporting ATPase subunit beta-3
P55011	SLC12A2	553	9.34	R.DATGNVN#DTIVTELTN#CTSAACK.L	0.03	1.956	S12A2_HUMAN Solute carrier family 12 member 2
P55011	SLC12A2	562	9.911	R.DATGNVN#DTIVTELTN#CTSAACK.L	0.03	1.956	S12A2_HUMAN Solute carrier family 12 member 2
P55268	LAMB2	1249	1000	R.N#TSAASTAQLVEATEELRR.E	2.14	4.868	LAMB2_HUMAN Laminin subunit beta-2
P56159	GFRA1	59	1000	K.ETN#FSLASGLEAK.D	0.16	3.123	GFRA1_HUMAN GDNF family receptor alpha-1
P56159	GFRA1	152	24.437	K.GN#NCLDAAK.A	-1.05	2.992	GFRA1_HUMAN GDNF family receptor alpha-1
P56159	GFRA1	406	20.985	K.SN#VSGNTHLCISNGNYEK.E	2.84	5.143	GFRA1_HUMAN GDNF family receptor alpha-1
P78504	JAG1	217	11.015	R.DDFFGHYACDQNGN#K.T	-3.32	3.022	JAG1_HUMAN Protein jagged-1
P78536	ADAM17	103	1000	K.VVVVDGKN#ESEYTVK.W	-0.51	2.915	ADA17_HUMAN Disintegrin and metalloproteinase domain-containing protein 17
P78536	ADAM17	452	1000	K.MFSN#CSK.Q	8	2.096	ADA17_HUMAN Disintegrin and metalloproteinase domain-containing protein 17
P78536	ADAM17	539	1000	K.CQEAIN#ATCK.G	-0.63	1.927	ADA17_HUMAN Disintegrin and metalloproteinase domain-containing protein 17
P78536	ADAM17	598	2.017	R.EQQLESCACNETDN#SCK.V	-2.62	1.256	ADA17_HUMAN Disintegrin and metalloproteinase domain-containing protein 17
P98160	HSPG2	89	1000	R.ALVN#FTR.S	-0.52	2.28	PGBM_HUMAN Basement membrane-specific heparan sulfate proteoglycan core protein
Q02487	DSC2	392	1000	R.AN#YTILK.G	-1.99	2.187	DSC2_HUMAN Desmocollin-2
Q03405	PLAUR	194	1000	K.CCN#TTK.C	-9.81	1.54	UPAR_HUMAN Urokinase plasminogen activator surface receptor
Q04721	NOTCH2	46	32.218	R.DGYEPCVNEGMCVTYHN#GTGYCK.C	3.06	4.005	NOTC2_HUMAN Neurogenic locus notch homolog protein 2
Q07954	LRP1	357	1000	R.CDMDGQN#R.T	-0.56	2.946	LRP1_HUMAN Prolow-density lipoprotein receptor-related protein 1
Q07954	LRP1	2521	1000	R.AVN#SSCR.A	-0.4	2.667	LRP1_HUMAN Prolow-density lipoprotein receptor-related protein 1
Q07954	LRP1	3333	1000	R.TCVSN#CTASQFVCK.N	-5.02	1.829	LRP1_HUMAN Prolow-density lipoprotein receptor-related protein 1
Q07954	LRP1	4364	1000	K.QSGDVTCN#CTDGR.V	-1.03	3.335	LRP1_HUMAN Prolow-density lipoprotein receptor-related protein 1
Q08334	IL10RB	161	1000	K.N#GTDEK.F	-0.3	1.656	I10R2_HUMAN Interleukin-10 receptor subunit beta
Q08722	CD47	73	1000	K.GRDIYTFDGALN#K.S	6.97	2.804	CD47_HUMAN Leukocyte surface antigen CD47
Q08722	CD47	111	1000	K.SDAVSHTGN#YTCEVTELTR.E	-0.2	1.547	CD47_HUMAN Leukocyte surface antigen CD47
Q12913	PTPRJ	231	6.591	K.AALSWSNGN#GTASCR.V	6.85	3.402	PTPRJ_HUMAN Receptor-type tyrosine-protein phosphatase eta
Q12913	PTPRJ	342	1000	R.YN#ATVYSQAAN#GTEGQPQAIEFR.T	-0.36	2.438	PTPRJ_HUMAN Receptor-type tyrosine-protein phosphatase eta
Q12913	PTPRJ	351	1000	R.YN#ATVYSQAAN#GTEGQPQAIEFR.T	-0.36	2.438	PTPRJ_HUMAN Receptor-type tyrosine-protein phosphatase eta
Q12913	PTPRJ	391	1000	K.VSDN#ESSSN#YTYK.I	0.84	1.217	PTPRJ_HUMAN Receptor-type tyrosine-protein phosphatase eta
Q12913	PTPRJ	396	1000	K.VSDN#ESSSN#YTYK.I	0.84	1.217	PTPRJ_HUMAN Receptor-type tyrosine-protein phosphatase eta
Q12913	PTPRJ	413	4.085	K.IHVAGETDSSNLN#VSEPR.A	-8.93	3.726	PTPRJ_HUMAN Receptor-type tyrosine-protein phosphatase eta
Q13308	PTK7	116	97.748	R.SAN#ASFNIK.W	-9.83	2.452	PTK7_HUMAN Inactive tyrosine-protein kinase 7
Q13308	PTK7	567	1000	R.VTRDDAGN#YTCIASN#GPQGQIR.A	-4.53	2.612	PTK7_HUMAN Inactive tyrosine-protein kinase 7
Q13308	PTK7	574	1000	R.VTRDDAGN#YTCIASN#GPQGQIR.A	-4.53	2.612	PTK7_HUMAN Inactive tyrosine-protein kinase 7
Q13332	PTPRS	733	1000	R.KVEAEALN#ATAIR.V	-0.96	5.051	PTPRS_HUMAN Receptor-type tyrosine-protein phosphatase S
Q13433	SLC39A6	67	17.009	R.YGEN#NSLSVEGFRK.L	0.83	2.747	S39A6_HUMAN Zinc transporter ZIP6
Q13433	SLC39A6	241	1000	R.KTN#ESVSEPRK.G	-1	3.348	S39A6_HUMAN Zinc transporter ZIP6
Q13433	SLC39A6	266	12.79	R.NTNENPQECFN#ASK.L	0.89	1.476	S39A6_HUMAN Zinc transporter ZIP6
Q13433	SLC39A6	283	2.017	K.LLTSHGM*GIQVPLN#ATEFNYLCPAIINQIDAR.S	0.35	4.372	S39A6_HUMAN Zinc transporter ZIP6
Q13444	ADAM15	237	1000	K.YRDFQHLLN#R.T	-1.1	5.273	ADA15_HUMAN Disintegrin and metalloproteinase domain-containing protein 15
Q13444	ADAM15	392	0	K.TCIMEASTDFLPGLNFSN#CSR.R	2.09	2.398	ADA15_HUMAN Disintegrin and metalloproteinase domain-containing protein 15
Q13641	TPBG	81	1000	R.N#LTEVPTDLPAYVR.N	-0.36	4.5	TPBG_HUMAN Trophoblast glycoprotein
Q13641	TPBG	256	121.36	R.N#LTHLESLHLEDNALK.V	-2.04	4.019	TPBG_HUMAN Trophoblast glycoprotein
Q13641	TPBG	275	1000	K.VLHN#GTLAELQGLPHIR.V	-1.29	6.943	TPBG_HUMAN Trophoblast glycoprotein
Q13740	ALCAM	95	76.733	R.LNLSEN#YTLSISNAR.I	-0.09	4.615	CD166_HUMAN CD166 antigen
Q13740	ALCAM	167	1000	K.LGDCISEDSYPDGN#ITWYR.N	0.19	1.836	CD166_HUMAN CD166 antigen
Q13740	ALCAM	265	1000	K.EGDN#ITLK.C	-5.52	3.244	CD166_HUMAN CD166 antigen
Q13740	ALCAM	306	1000	R.RN#ATGDYK.C	-0.08	2.004	CD166_HUMAN CD166 antigen
Q13740	ALCAM	361	1000	R.N#ATVVWM*K.D	2.87	2.184	CD166_HUMAN CD166 antigen
Q13740	ALCAM	480	109.943	K.IIISPEEN#VTLTCTAENQLER.T	-0.04	5.09	CD166_HUMAN CD166 antigen
Q13740-2	ALCAM	499	76.733	R.TVNSLN#VSANENR.E	-8.7	3.44	CD166_HUMAN Isoform 2 of CD166 antigen
Q14118	DAG1	641	1000	K.LAFAFGDRN#CSTITLQN#ITR.G	-0.1	5.731	DAG1_HUMAN Dystroglycan
Q14118	DAG1	649	1000	K.KLAFAFGDRN#CSTITLQN#ITR.G	0.5	7.236	DAG1_HUMAN Dystroglycan
Q14126	DSG2	182	71.067	K.IN#ATDADEPNTLNSK.I	9.63	2.722	DSG2_HUMAN Desmoglein-2
Q14126	DSG2	462	1000	R.YVQN#GTYTVK.I	-0.82	3.135	DSG2_HUMAN Desmoglein-2
Q14542	SLC29A2	48	1000	R.LAGAGN#STAR.I	1.3	2.375	S29A2_HUMAN Equilibrative nucleoside transporter 2
Q14956	GPNMB	249	35.777	K.NDRN#SSDETFLK.D	-1.04	4.386	GPNMB_HUMAN Transmembrane glycoprotein NMB
Q15043	SLC39A14	77	1000	R.GN#VTQHVQGHR.N	-0.48	4.271	S39AE_HUMAN Zinc transporter ZIP14
Q15223	PVRL1	72	1000	K.STN#GSK.Q	-0.56	2.297	PVRL1_HUMAN Poliovirus receptor-related protein 1
Q15223	PVRL1	202	17.009	R.NPN#GTVTVISR.Y	3.59	2.543	PVRL1_HUMAN Poliovirus receptor-related protein 1
Q15223	PVRL1	297	1000	K.GVEAQN#R.T	-0.73	2.729	PVRL1_HUMAN Poliovirus receptor-related protein 1
Q15262	PTPRK	416	1000	R.RIAVDWESLGYN#ITR.C	0.2	3.506	PTPRK_HUMAN Receptor-type tyrosine-protein phosphatase kappa
Q15262	PTPRK	436	1000	R.GHN#ESK.A	-0.87	1.262	PTPRK_HUMAN Receptor-type tyrosine-protein phosphatase kappa
Q15262	PTPRK	462	65.246	K.APQHVVNHLPPYTN#VSLK.M	4.15	4.717	PTPRK_HUMAN Receptor-type tyrosine-protein phosphatase kappa
Q15303	ERBB4	358	1000	K.FIN#CTK.I	1.12	2.373	ERBB4_HUMAN Receptor tyrosine-protein kinase erbB-4
Q15303	ERBB4	576	1000	K.MEDGLLTCHGPGPDN#CTK.C	-5.24	3.912	ERBB4_HUMAN Receptor tyrosine-protein kinase erbB-4
Q15758	SLC1A5	212	1000	R.SYSTTYEERN#ITGTR.V	-0.01	3.04	AAAT_HUMAN Neutral amino acid transporter B(0)
Q15768	EFNB3	210	18.805	K.ENLPGDPTSN#ATSR.G	-0.71	2.048	EFNB3_HUMAN Ephrin-B3
Q15904	ATP6AP1	261	1000	K.QPVSPVIHPPVSYN#DTAPR.I	3	4.337	VAS1_HUMAN V-type proton ATPase subunit S1
Q16563	SYPL1	71	11.721	K.GQTEIQVNCPPAVTEN#K.T	1.8	2.118	SYPL1_HUMAN Synaptophysin-like protein 1
Q29980	MICB	234	1000	R.N#ITLTWR.Q	-3.88	2.899	MICB_HUMAN MHC class I polypeptide-related sequence B
Q29983	MICA	79	1000	R.AKPQGQWAEDVLGN#K.T	-0.52	4.526	MICA_HUMAN MHC class I polypeptide-related sequence A
Q29983	MICA	125	1000	R.VCEIHEDN#STR.S	-2.94	2.672	MICA_HUMAN MHC class I polypeptide-related sequence A
Q29983	MICA	210	1000	R.TVPPMVN#VTR.S	1.76	2.716	MICA_HUMAN MHC class I polypeptide-related sequence A
Q29983	MICA	220	1000	R.SEASEGN#ITVTCR.A	-0.59	3.427	MICA_HUMAN MHC class I polypeptide-related sequence A
Q3MIR4	TMEM30B	273	1000	R.IRQGN#YSAGLPR.G	-6.27	5.439	CC50B_HUMAN Cell cycle control protein 50B
Q3MIR4	TMEM30B	286	36.556	R.GAYRVN#ITYNYPVR.A	-0.77	3.865	CC50B_HUMAN Cell cycle control protein 50B
Q4KMQ2	ANO6	493	30.835	K.NIN#GTDPIQK.Y	-9.45	2.943	ANO6_HUMAN Anoctamin-6
Q4KMQ2	ANO6	802	29.667	K.GNPYSDLGN#HTTCR.Y	-0.19	1.937	ANO6_HUMAN Anoctamin-6
Q58DX5	NAALADL2	295	37.54	K.N#VTNQIALLK.L	-2.16	2.875	NADL2_HUMAN Inactive N-acetylated-alpha-linked acidic dipeptidase-like protein 2
Q58DX5	NAALADL2	556	48.874	K.NNFN#CTR.R	-8.06	2.231	NADL2_HUMAN Inactive N-acetylated-alpha-linked acidic dipeptidase-like protein 2
Q58EX2	SDK2	577	1000	R.VISAGGN#DSR.S	-0.1	2.574	SDK2_HUMAN Protein sidekick-2
Q5HYA8	TMEM67	179	1000	R.CEPTFVN#TSR.S	-7.23	1.94	MKS3_HUMAN Meckelin
Q5MY95	ENTPD8	135	1000	R.KN#SSQAR.D	-1.1	2.034	ENTP8_HUMAN Ectonucleoside triphosphate diphosphohydrolase 8
Q5SZK8	FREM2	2121	1000	K.ATVSIN#DSVSDLPK.M	6.64	1.987	FREM2_HUMAN FRAS1-related extracellular matrix protein 2
Q5VU97	CACHD1	329	24.437	R.STNN#NTK.F	-0.77	3.064	CAHD1_HUMAN VWFA and cache domain-containing protein 1
Q5VW38	GPR107	169	5.216	K.VLGQSQEPNVNPASAGN#QTQK.T	5.47	1.719	GP107_HUMAN Protein GPR107
Q5VY80	RAET1L	68	1000	K.TFLHYDCGN#K.T	-10.72	1.868	RET1L_HUMAN Retinoic acid early transcript 1L protein
Q5ZPR3	CD276	91	1000	K.QLVHSFAEGQDQGSAYAN#R.T	2.17	2.435	CD276_HUMAN CD276 antigen
Q5ZPR3	CD276	104	1000	R.TALFPDLLAQGN#ASLR.L	1.5	5.566	CD276_HUMAN CD276 antigen
Q5ZPR3	CD276	215	1000	R.VVLGAN#GTYSCLVR.N	0.3	2.795	CD276_HUMAN CD276 antigen
Q5ZPR3	CD276	309	1000	K.QLVHSFTEGRDQGSAYAN#R.T	-3.7	1.198	CD276_HUMAN CD276 antigen
Q658P3	STEAP3	344	1000	K.QVLAN#K.S	-0.67	2.576	STEA3_HUMAN Metalloreductase STEAP3
Q6EMK4	VASN	117	1000	R.LHEITN#ETFR.G	-9.01	3.166	VASN_HUMAN Vasorin
Q6H3X3	RAET1G	82	1000	K.KLN#VTTAWK.A	-2.86	5.72	RET1G_HUMAN Retinoic acid early transcript 1G protein
Q6P4Q7	CNNM4	85	33.657	R.LYGYSLGN#ISSNLISFTEVDDAETLHK.S	-1.24	5.844	CNNM4_HUMAN Metal transporter CNNM4
Q6P4Q7	CNNM4	122	1000	K.DLVVQQLVN#VSRGN#TSGVLVVLTK.F	4.99	5.128	CNNM4_HUMAN Metal transporter CNNM4
Q6P4Q7	CNNM4	127	1000	R.GN#TSGVLVVLTK.F	-0.15	2.826	CNNM4_HUMAN Metal transporter CNNM4
Q6PCB8	EMB	213	1000	K.YVIN#GTYAN#ETK.L	1.07	3.314	EMB_HUMAN Embigin
Q6PCB8	EMB	218	1000	K.YVIN#GTYAN#ETK.L	1.07	3.314	EMB_HUMAN Embigin
Q6UWV2	MPZL3	123	1000	K.DN#GTFSCAVK.N	8.75	1.289	MPZL3_HUMAN Myelin protein zero-like protein 3
Q6UXD5	SEZ6L2	641	1000	K.EVPRN#DTCPELPPPEWGWR.T	-1.57	3.722	SE6L2_HUMAN Seizure 6-like protein 2
Q6UXG2	KIAA1324	391	12.218	K.TNN#STCQPCPYGSYSN#GSDCTR.C	-0.01	3.634	K1324_HUMAN UPF0577 protein KIAA1324
Q6UXG2	KIAA1324	404	85.265	K.TNN#STCQPCPYGSYSN#GSDCTR.C	-0.01	3.634	K1324_HUMAN UPF0577 protein KIAA1324
Q6UXI9	NPNT	273	1000	K.GN#GTILK.G	-4.19	1.694	NPNT_HUMAN Nephronectin
Q6YHK3	CD109	118	1000	R.TQDEILFSN#STR.L	-12.96	4.452	CD109_HUMAN CD109 antigen
Q6YHK3	CD109	419	1000	K.IN#YTVPQSGTFK.I	5.3	2.83	CD109_HUMAN CD109 antigen
Q6ZMP0	THSD4	709	1000	R.QVYAN#R.S	-1.52	1.831	THSD4_HUMAN Thrombospondin type-1 domain-containing protein 4
Q6ZUK4	TMEM26	110	52.403	R.KEDFN#QTLTSNEQTSR.A	-7.52	2.082	TMM26_HUMAN Transmembrane protein 26
Q7KYR7	BTN2A1	216	49.097	R.N#MSCSIN#NTLLGQKK.E	-0.22	3.51	BT2A1_HUMAN Butyrophilin subfamily 2 member A1
Q7KYR7	BTN2A1	222	6.591	R.N#MSCSIN#NTLLGQKK.E	-0.22	3.51	BT2A1_HUMAN Butyrophilin subfamily 2 member A1
Q7Z5N4	SDK1	782	68.171	R.TN#QSIMVQWQPPPETEHNGVLR.G	-1.17	4.652	SDK1_HUMAN Protein sidekick-1
Q7Z5N4	SDK1	1767	1000	K.N#LTSHTK.Y	-0.18	2.172	SDK1_HUMAN Protein sidekick-1
Q86SQ4	GPR126	143	1000	K.GFN#ASYIR.V	-10.84	1.257	GP126_HUMAN G-protein coupled receptor 126
Q86SQ4	GPR126	505	24.437	K.NN#ESLDEGLR.L	-1.11	3.951	GP126_HUMAN G-protein coupled receptor 126
Q86UF1	TSPAN33	172	4.691	K.DWSQNMYFN#CSEDNPSRER.C	0.99	2.286	TSN33_HUMAN Tetraspanin-33
Q86WC4	OSTM1	135	1000	R.AAGN#TSESQSCAR.S	-1.39	4.373	OSTM1_HUMAN Osteopetrosis-associated transmembrane protein 1
Q8IWA5	SLC44A2	187	1000	K.GVLMVGN#ETTYEDGHGSRKN#ITDLVEGAK.K	-4.11	6.921	CTL2_HUMAN Choline transporter-like protein 2
Q8IWA5	SLC44A2	200	1000	K.N#ITDLVEGAK.K	-1.49	4.297	CTL2_HUMAN Choline transporter-like protein 2
Q8IWA5	SLC44A2	417	132.105	K.TCNPETFPSSN#ESR.Q	-0.39	5.22	CTL2_HUMAN Choline transporter-like protein 2
Q8IWT6	LRRC8A	66	1000	K.DSCN#DSFR.G	-0.54	1.672	LRC8A_HUMAN Leucine-rich repeat-containing protein 8A
Q8IWU5	SULF2	171	1000	R.FYN#YTLCR.N	-1.83	2.678	SULF2_HUMAN Extracellular sulfatase Sulf-2
Q8N0Z9	VSIG10	347	1000	R.N#LTQPEVIIQPSSR.H	4.47	3.186	VSI10_HUMAN V-set and immunoglobulin domain-containing protein 10
Q8N271	PROM2	725	1000	R.N#VSECFLAR.E	4.18	3.001	PROM2_HUMAN Prominin-2
Q8N3J6	CADM2	291	1000	K.TDN#GTYR.C	-7.85	1.148	CADM2_HUMAN Cell adhesion molecule 2
Q8N441	FGFRL1	231	1000	R.AGAIN#ATYK.V	0.34	2.026	FGRL1_HUMAN Fibroblast growth factor receptor-like 1
Q8N6C5	IGSF1	1223	1000	K.GIGN#YSCSYR.L	3.92	3.921	IGSF1_HUMAN Immunoglobulin superfamily member 1
Q8N8Z6	DCBLD1	64	47.574	K.NYPGTYPN#HTVCEK.T	-1.49	3.474	DCBD1_HUMAN Discoidin, CUB and LCCL domain-containing protein 1
Q8NBN3	TMEM87A	157	1000	K.QEAKEN#GTN#LTFIGDK.T	-2.12	2.754	TM87A_HUMAN Transmembrane protein 87A
Q8NBN3	TMEM87A	160	1000	K.QEAKEN#GTN#LTFIGDK.T	-2.12	2.754	TM87A_HUMAN Transmembrane protein 87A
Q8NC42	RNF149	131	88.819	R.RN#ASAVVLYNEER.Y	-1.43	3.508	RN149_HUMAN E3 ubiquitin-protein ligase RNF149
Q8NCS7	SLC44A5	416	1000	K.VIAPGGHCIHEN#QTCDPEIFN#TTEIAK.A	-2.24	2.922	CTL5_HUMAN Choline transporter-like protein 5
Q8NCS7	SLC44A5	425	1000	K.VIAPGGHCIHEN#QTCDPEIFN#TTEIAK.A	-2.24	2.922	CTL5_HUMAN Choline transporter-like protein 5
Q8NFZ8	CADM4	67	1000	R.QTLFFN#GTR.A	5.58	3.834	CADM4_HUMAN Cell adhesion molecule 4
Q8NFZ8	CADM4	262	13.38	R.WNRGN#ESLPER.A	-6.15	2.26	CADM4_HUMAN Cell adhesion molecule 4
Q8TAB3	PCDH19	546	1000	K.DGGLPSLQSN#ATVR.V	-2.29	2.812	PCD19_HUMAN Protocadherin-19
Q8TB96	ITFG1	353	25.174	K.N#TSGSNQQAFLLENVPCNN#ASCEEARR.M	4.96	4.006	TIP_HUMAN T-cell immunomodulatory protein
Q8TB96	ITFG1	371	7.71	K.N#TSGSNQQAFLLENVPCNN#ASCEEARR.M	4.96	4.006	TIP_HUMAN T-cell immunomodulatory protein
Q8TC71	SPATA18	495	1000	K.GEAVTRRGAFWN#SVRSVSR.C	1.28	1.26	MIEAP_HUMAN Mitochondria-eating protein
Q8TCT8	SPPL2A	149	1000	K.DFRDM*N#QTLGDN#ITVK.M	1.99	2.338	SPP2A_HUMAN Signal peptide peptidase-like 2A
Q8TCT8	SPPL2A	155	1000	K.DFRDM*N#QTLGDN#ITVK.M	1.99	2.338	SPP2A_HUMAN Signal peptide peptidase-like 2A
Q8WTV0	SCARB1	102	59.298	K.SN#ITFNNN#DTVSFLEYR.T	-0.21	3.848	SCRB1_HUMAN Scavenger receptor class B member 1
Q8WTV0	SCARB1	108	9.34	K.SN#ITFNNN#DTVSFLEYR.T	-0.21	3.848	SCRB1_HUMAN Scavenger receptor class B member 1
Q8WWY8	LIPH	357	1000	K.AGN#TTESK.I	-1.15	2.227	LIPH_HUMAN Lipase member H
Q8WXI7	MUC16	12416	1000	R.KFN#TTER.V	-1.21	1.693	MUC16_HUMAN Mucin-16
Q92508	PIEZO1	2294	1000	R.ELYN#GTADITLR.F	8.46	3.79	PIEZ1_HUMAN Piezo-type mechanosensitive ion channel component 1
Q92508	PIEZO1	2331	1000	K.HMLALAPN#STAR.R	0.68	2.759	PIEZ1_HUMAN Piezo-type mechanosensitive ion channel component 1
Q92542	NCSTN	387	1000	R.TSLELWM*HTDPVSQKN#ESVR.N	0.06	4.161	NICA_HUMAN Nicastrin
Q92542	NCSTN	417	1000	K.SGAGVPAVILRRPN#QSQPLPPSSLQR.F	-3.68	3.199	NICA_HUMAN Nicastrin
Q92542	NCSTN	612	1000	K.DLYEYSWVQGPLHSN#ETDRLPR.C	-1.4	4.717	NICA_HUMAN Nicastrin
Q92823	NRCAM	223	1000	R.FN#HTQTIQQK.Q	-0.59	2.989	NRCAM_HUMAN Neuronal cell adhesion molecule
Q92823	NRCAM	276	45.026	R.ERPPTFLTPEGN#ASNK.E	0.96	4.873	NRCAM_HUMAN Neuronal cell adhesion molecule
Q92823	NRCAM	858	28.934	R.VNVVN#STLAEVHWDPVPLK.S	-0.39	4.496	NRCAM_HUMAN Neuronal cell adhesion molecule
Q92823	NRCAM	1019	48.874	K.NLN#FSTR.Y	-2.53	2.794	NRCAM_HUMAN Neuronal cell adhesion molecule
Q92854	SEMA4D	379	71.753	R.AAN#YTSSLNLPDK.T	4.88	1.967	SEM4D_HUMAN Semaphorin-4D
Q96HA4	C1orf159	104	1000	R.CGN#GTLPAYN#GSECR.S	-10.61	1.394	CA159_HUMAN Uncharacterized protein C1orf159
Q96HA4	C1orf159	111	1000	R.CGN#GTLPAYN#GSECR.S	-10.61	1.394	CA159_HUMAN Uncharacterized protein C1orf159
Q96HA4	C1orf159	128	1000	R.SFAGPGAPFPMN#R.S	2.9	3.621	CA159_HUMAN Uncharacterized protein C1orf159
Q96K49	TMEM87B	68	1000	K.TMFN#STDIK.L	0.87	2.068	TM87B_HUMAN Transmembrane protein 87B
Q96NT5	SLC46A1	58	1000	R.FSADLGYN#GTR.Q	-0.92	4.065	PCFT_HUMAN Proton-coupled folate transporter
Q96NY8	PVRL4	281	1000	K.CLSEGQPPPSYN#WTR.L	-1.95	4.038	PVRL4_HUMAN Poliovirus receptor-related protein 4
Q96QE2	SLC2A13	433	1000	R.ITFKPIAPSGQN#ATCTR.Y	4.28	2.757	MYCT_HUMAN Proton myo-inositol cotransporter
Q96RD7	PANX1	255	1000	K.SGILRN#DSTVPDQFQCK.L	4.29	2.752	PANX1_HUMAN Pannexin-1
Q99523	SORT1	162	24.437	K.DITDLIN#NTFIR.T	0.92	4.376	SORT_HUMAN Sortilin
Q99571	P2RX4	75	1000	K.GVAVTN#TSK.L	-0.69	2.117	P2RX4_HUMAN P2X purinoceptor 4
Q9BXC0	HCAR1	3	1000	-.M*YN#GSCCR.I	0.27	1.368	HCAR1_HUMAN Hydroxycarboxylic acid receptor 1
Q9BY67	CADM1	101	1000	R.FQLLN#FSSSELK.V	-0.34	3.41	CADM1_HUMAN Cell adhesion molecule 1
Q9BY67	CADM1	113	1000	K.VSLTN#VSISDEGR.Y	5.67	4.015	CADM1_HUMAN Cell adhesion molecule 1
Q9BZC7	ABCA2	1549	1000	K.SPAN#GSLGPTLN#LSSGESR.L	0.25	2.898	ABCA2_HUMAN ATP-binding cassette sub-family A member 2
Q9BZC7	ABCA2	1557	1000	K.SPAN#GSLGPTLN#LSSGESR.L	0.25	2.898	ABCA2_HUMAN ATP-binding cassette sub-family A member 2
Q9BZR6	RTN4R	372	1000	K.GRVPPGDSPPGN#GSGPR.H	0.06	1.254	RTN4R_HUMAN Reticulon-4 receptor
Q9C0C4	SEMA4C	106	24.437	K.NN#QTECFNFIR.F	3.55	4.095	SEM4C_HUMAN Semaphorin-4C
Q9C0C4	SEMA4C	121	1000	R.FLQPYN#ASHLYVCGTYAFQPK.C	0.99	3.67	SEM4C_HUMAN Semaphorin-4C
Q9C0C4	SEMA4C	522	1000	R.DPYCAWSVN#TSR.C	-2.13	3.738	SEM4C_HUMAN Semaphorin-4C
Q9H0U3	MAGT1	71	1000	K.APPRN#YSVIVMFTALQLHR.Q	-0.05	7.212	MAGT1_HUMAN Magnesium transporter protein 1
Q9H0X4	ITFG3	116	48.874	K.NTN#SSNN#FSR.S	-7.53	3.892	ITFG3_HUMAN Protein ITFG3
Q9H0X4	ITFG3	120	24.437	K.NTN#SSNN#FSR.S	-7.53	3.892	ITFG3_HUMAN Protein ITFG3
Q9H0X4	ITFG3	389	1000	R.YKPDTLAVAVEN#GTGTDR.Q	-0.21	2.305	ITFG3_HUMAN Protein ITFG3
Q9H6X2	ANTXR1	184	1000	K.DFN#ETQLAR.I	-5.5	1.936	ANTR1_HUMAN Anthrax toxin receptor 1
Q9H8M5	CNNM2	112	0	R.VYGQNINN#ETWSR.I	-4.08	3.48	CNNM2_HUMAN Metal transporter CNNM2
Q9HC56	PCDH9	450	1000	K.IVASDSGKPSLN#QTALVR.V	1.97	3.632	PCDH9_HUMAN Protocadherin-9
Q9HCN3	TMEM8A	232	1000	R.DCVSN#GSLGCPVR.L	-8.69	1.12	TMM8A_HUMAN Transmembrane protein 8A
Q9HCN3	TMEM8A	535	1000	R.GWSCTDN#STAQTVAQQR.A	0.3	2.113	TMM8A_HUMAN Transmembrane protein 8A
Q9HCU4	CELSR2	1032	0	R.LLDRNDNPPVLGNFEILFNN#YVTNR.S	0.27	6.704	CELR2_HUMAN Cadherin EGF LAG seven-pass G-type receptor 2
Q9HCU4	CELSR2	1036	20.167	R.LLDRNDNPPVLGNFEILFNNYVTN#R.S	0.53	9.089	CELR2_HUMAN Cadherin EGF LAG seven-pass G-type receptor 2
Q9HCU4	CELSR2	1076	115.01	R.GNELSLVLLN#ASTGELK.L	2.56	4.733	CELR2_HUMAN Cadherin EGF LAG seven-pass G-type receptor 2
Q9HCU4	CELSR2	1565	6.591	R.HIDM*ADFIANN#GTVPGCPAK.K	7.41	2.113	CELR2_HUMAN Cadherin EGF LAG seven-pass G-type receptor 2
Q9HCU4	CELSR2	1741	1000	R.LHGLHLSN#ITVGGIPGPAGGVAR.G	-1.95	4.327	CELR2_HUMAN Cadherin EGF LAG seven-pass G-type receptor 2
Q9HCU4	CELSR2	1900	1000	K.GFDPDCN#K.T	-6.28	2.261	CELR2_HUMAN Cadherin EGF LAG seven-pass G-type receptor 2
Q9HCU4	CELSR2	2043	1000	R.LQRN#ESGLDSGR.S	-0.29	4.394	CELR2_HUMAN Cadherin EGF LAG seven-pass G-type receptor 2
Q9HCU4	CELSR2	2061	1000	R.N#ATQHTAGYFGSDVK.V	-4.54	4.304	CELR2_HUMAN Cadherin EGF LAG seven-pass G-type receptor 2
Q9HDC9	APMAP	160	1000	R.AGPN#GTLFVADAYK.G	-1.93	2.983	APMAP_HUMAN Adipocyte plasma membrane-associated protein
Q9NPH3	IL1RAP	118	1000	R.N#TTYCSK.V	-0.83	2.247	IL1AP_HUMAN Interleukin-1 receptor accessory protein
Q9NPR2	SEMA4B	405	1000	R.KIN#SSLQLPDR.V	-3.9	3.703	SEM4B_HUMAN Semaphorin-4B
Q9NYQ6	CELSR1	1576	1000	K.DIGN#YSCAAQGTQTGSKK.S	2.14	4.152	CELR1_HUMAN Cadherin EGF LAG seven-pass G-type receptor 1
Q9NYQ6	CELSR1	1640	9.34	K.NVDMAGFIANN#GTR.E	3.73	3.286	CELR1_HUMAN Cadherin EGF LAG seven-pass G-type receptor 1
Q9NYQ6	CELSR1	1979	1000	K.GFDPDCN#KTN#GQCQCK.E	3.51	1.204	CELR1_HUMAN Cadherin EGF LAG seven-pass G-type receptor 1
Q9NYQ6	CELSR1	1982	1000	K.GFDPDCN#KTN#GQCQCK.E	3.51	1.204	CELR1_HUMAN Cadherin EGF LAG seven-pass G-type receptor 1
Q9NYQ6	CELSR1	2122	1000	K.LSRN#ETQVDGAR.A	-0.7	1.904	CELR1_HUMAN Cadherin EGF LAG seven-pass G-type receptor 1
Q9P055	JKAMP	37	1000	K.N#GSTEIYGECGVCPR.G	-2.25	1.819	JKAMP_HUMAN JNK1/MAPK8-associated membrane protein
Q9P0K1	ADAM22	519	16.198	R.ETCSGN#SSQCAPNIHK.M	0.41	1.053	ADA22_HUMAN Disintegrin and metalloproteinase domain-containing protein 22
Q9P2B2	PTGFRN	286	1000	K.N#VSVAEGK.E	-0.34	3.152	FPRP_HUMAN Prostaglandin F2 receptor negative regulator
Q9P2B2	PTGFRN	525	24.437	K.QRN#NSWVK.S	-7.53	2.158	FPRP_HUMAN Prostaglandin F2 receptor negative regulator
Q9P2B2	PTGFRN	600	1000	R.YSVLIMAEKPVGDLSSPN#ETK.Y	0.03	4.472	FPRP_HUMAN Prostaglandin F2 receptor negative regulator
Q9P2B2	PTGFRN	618	1000	K.LEN#WTDASR.V	4.43	1.804	FPRP_HUMAN Prostaglandin F2 receptor negative regulator
Q9UGT4	SUSD2	162	1000	K.SELVN#ETR.W	-8.16	2.751	SUSD2_HUMAN Sushi domain-containing protein 2
Q9UGT4	SUSD2	494	1000	R.AQPGTMSN#GTETR.G	-0.77	2.699	SUSD2_HUMAN Sushi domain-containing protein 2
Q9UHG3	PCYOX1	323	36.701	K.M*SN#ITFLNFDPPIEEFHQYYQHIVTTLVK.G	-2.02	5.969	PCYOX_HUMAN Prenylcysteine oxidase 1
Q9UHN6	TMEM2	171	1000	K.DGSRN#ITLR.T	3.15	1.923	TMEM2_HUMAN Transmembrane protein 2
Q9UHN6	TMEM2	292	1000	K.ILESERFDTHEYRN#ESR.R	7.31	3.252	TMEM2_HUMAN Transmembrane protein 2
Q9UHN6	TMEM2	739	1000	K.TTN#SSAADPR.E	-0.34	3.322	TMEM2_HUMAN Transmembrane protein 2
Q9UHN6	TMEM2	1092	1000	R.QN#GSLSK.I	-0.75	1.936	TMEM2_HUMAN Transmembrane protein 2
Q9UHW9	SLC12A6	398	9.34	K.EINN#MTVPSK.L	1.08	2.739	S12A6_HUMAN Solute carrier family 12 member 6
Q9UIG8	SLCO3A1	153	1000	R.WGAEGRDVCAAN#GSGGDEGPDPDLICR.N	3.2	2.711	SO3A1_HUMAN Solute carrier organic anion transporter family member 3A1
Q9UIW2	PLXNA1	77	1000	K.LSGN#LTLLR.A	-0.7	3.744	PLXA1_HUMAN Plexin-A1
Q9UIW2	PLXNA1	1043	1000	K.YN#YTEDPTILR.I	-2.66	2.365	PLXA1_HUMAN Plexin-A1
Q9UJ14	GGT7	586	4.691	R.GLSGLTQVLLNVLTLNRN#LSDSLAR.G	0.5	7.439	GGT7_HUMAN Gamma-glutamyltransferase 7
Q9UJW2-2	TINAG	171	0	R.LGTLPPSPMLLSM*NEMTLVSHACYPLFKDQN#ATNN#GCAMASRSDGRGK.R	-4.15	2.065	TINAG_HUMAN Isoform 2 of Tubulointerstitial nephritis antigen
Q9UJW2-2	TINAG	175	0	R.LGTLPPSPMLLSM*NEMTLVSHACYPLFKDQN#ATNN#GCAMASRSDGRGK.R	-4.15	2.065	TINAG_HUMAN Isoform 2 of Tubulointerstitial nephritis antigen
Q9ULF5	SLC39A10	339	45.825	K.DLNEDDHHHECLN#VTQLLK.Y	1.09	2.63	S39AA_HUMAN Zinc transporter ZIP10
Q9ULI3	HEG1	1080	1000	K.RTFLN#TTVEK.H	0.96	3.459	HEG1_HUMAN Protein HEG homolog 1
Q9UM47	NOTCH3	1179	1000	R.CLHN#GTCVDLVGGFR.C	1.16	5.129	NOTC3_HUMAN Neurogenic locus notch homolog protein 3
Q9UN76	SLC6A14	155	1000	K.N#CSSWSDK.N	4.38	2.025	S6A14_HUMAN Sodium- and chloride-dependent neutral and basic amino acid transporter B(0+)
Q9UN76	SLC6A14	174	30.612	R.SPIVTHCN#VSTVNK.G	-4.87	4.067	S6A14_HUMAN Sodium- and chloride-dependent neutral and basic amino acid transporter B(0+)
Q9UN76	SLC6A14	189	1000	K.GIQEIIQM*N#K.S	9.01	1.714	S6A14_HUMAN Sodium- and chloride-dependent neutral and basic amino acid transporter B(0+)
Q9UP38	FZD1	231	1000	K.FPVHGAGELCVGQN#TSDK.G	4	3.437	FZD1_HUMAN Frizzled-1
Q9Y4D7	PLXND1	155	1000	R.RRGN#ISAVAVR.F	-7.17	3.182	PLXD1_HUMAN Plexin-D1
Q9Y4D7	PLXND1	500	48.874	K.INLN#ESMQVVSR.R	6.55	4.349	PLXD1_HUMAN Plexin-D1
Q9Y4D7	PLXND1	696	1000	K.AN#FTIYDCSR.T	-0.72	3.349	PLXD1_HUMAN Plexin-D1
Q9Y4L1	HYOU1	515	1000	R.VFGSQN#LTTVK.L	-4.82	3.61	HYOU1_HUMAN Hypoxia up-regulated protein 1
Q9Y4L1	HYOU1	869	1000	K.N#ATLAEQAK.L	0.9	2.771	HYOU1_HUMAN Hypoxia up-regulated protein 1
Q9Y4L1	HYOU1	922	1000	K.DKN#GTRAEPPLN#ASASDQGEK.V	-0.44	3.591	HYOU1_HUMAN Hypoxia up-regulated protein 1
Q9Y4L1	HYOU1	931	1000	K.DKN#GTRAEPPLN#ASASDQGEK.V	-0.44	3.591	HYOU1_HUMAN Hypoxia up-regulated protein 1
Q9Y5L3	ENTPD2	129	31.275	R.LLN#LTNPEASTSVLMAVTHTLTQYPFDFR.G	-0.43	5.059	ENTP2_HUMAN Ectonucleoside triphosphate diphosphohydrolase 2
Q9Y5Y6	ST14	485	1000	R.CDGWADCTDHSDELN#CSCDAGHQFTCK.N	4.96	4.449	ST14_HUMAN Suppressor of tumorigenicity 14 protein
Q9Y639	NPTN	197	73.311	K.N#ASNMEYR.I	-0.18	3.03	NPTN_HUMAN Neuroplastin
Q9Y639	NPTN	229	1000	K.AN#ATIEVK.A	-1.06	2.602	NPTN_HUMAN Neuroplastin
Q9Y639	NPTN	276	1000	K.EN#GMPMDIVN#TSGR.F	1.78	3.222	NPTN_HUMAN Neuroplastin
Q9Y639	NPTN	284	1000	K.EN#GMPMDIVN#TSGR.F	1.78	3.222	NPTN_HUMAN Neuroplastin
Q9Y653	GPR56	303	1000	K.N#SSQVLGEK.V	-10.24	2.789	GPR56_HUMAN G-protein coupled receptor 56
Q9Y6M7	SLC4A7	786	49.59	K.DN#ITAHNISWR.N	9.44	3.883	S4A7_HUMAN Sodium bicarbonate cotransporter 3
Q9Y6M7	SLC4A7	796	1000	R.N#LTVSECK.K	7.06	2.652	S4A7_HUMAN Sodium bicarbonate cotransporter 3
