# Supplementary material for: Quantitative investigation of human cell surface N-glycoprotein dynamics
Source: Royal Society of Chemistry journal article supplement (doi:10.1039/c6sc01814a), 2016-08-15
Supplement: c6sc01814a6.xlsx [file c6sc01814a6.xlsx]

## Sheet: Sites Quantified
Table S3 - The Half-Lives of 311 Unique Glycosylation Sites in Expt# 1
Uniprot ID	Gene Symbol	Site	ModScore	ModScore Peptide	Half-Life (h)	PPM	XCorr	Domain Name	Domain Range	Annotation
A1A5B4	ANO9	641	1000	K.EGN#STVDCLK.G	14.59	-5.46	1.685			ANO9_HUMAN Anoctamin-9
F2Z333	C1orf233	109	1000	R.AFALN#CSWR.G	20.43	-0.48	3.091	Fibronectin type-III	74-166	CA233_HUMAN Fibronectin type-III domain-containing transmembrane protein C1orf233
O14672	ADAM10	439	1000	R.N#ISQVLEK.K	22.42	-3.2	2.697	Peptidase M12B	220-456	ADA10_HUMAN Disintegrin and metalloproteinase domain-containing protein 10
O14786	NRP1	150	1000	K.RGPECSQN#YTTPSGVIK.S	5.21	1.14	2.784	CUB 2	147-265	NRP1_HUMAN Neuropilin-1
O14786	NRP1	522	24.437	K.IGYSNN#GSDWK.M	5.11	0.76	3.196	F5/8 type C2	431-583	NRP1_HUMAN Neuropilin-1
O15031	PLXNB2	127	1000	R.ALSN#ISLR.L	22.5	-0.63	3.021	Sema	20-466	PLXB2_HUMAN Plexin-B2
O15031	PLXNB2	528	1000	K.SCVAVTSAQPQN#MSR.R	104.5	-1.01	1.563			PLXB2_HUMAN Plexin-B2
O15031	PLXNB2	733	1000	K.LSHDAN#ETLPLHLYVK.S	10.7	-2.08	6.774			PLXB2_HUMAN Plexin-B2
O15031	PLXNB2	844	1000	R.N#CSFQPER.Y	21.23	-0.9	2.461	IPT/TIG 1	803-893	PLXB2_HUMAN Plexin-B2
O15031	PLXNB2	1049	1000	R.EAESLQPM*TVVGTDYVFHN#DTK.V	11.29	2.04	4.091	IPT/TIG 3	983-1092	PLXB2_HUMAN Plexin-B2
O15230	LAMA5	2196	1000	R.GIN#ASSMAWAR.L	10.98	5.01	3.098			LAMA5_HUMAN Laminin subunit alpha-5
O15230	LAMA5	3107	1000	K.RLN#TTGVSAGCTADLLVGR.A	24.32	2.33	3.989	Laminin G-like 2	2941-3115	LAMA5_HUMAN Laminin subunit alpha-5
O15393	TMPRSS2	213	22.492	K.LN#TSAGNVDIYKK.L	11.9	4.03	1.952	SRCR	150-242	TMPS2_HUMAN Transmembrane protease serine 2
O15394	NCAM2	219	1000	K.SFN#ATAERGEEMTFSCR.A	115.46	-0.59	5.675	Ig-like C2-type 3	208-297	NCAM2_HUMAN Neural cell adhesion molecule 2
O15394	NCAM2	562	18.805	R.SHGVQTM*VVLNNLEPN#TTYEIR.V	82.15	4.97	5.084	Fibronectin type-III 1	498-591	NCAM2_HUMAN Neural cell adhesion molecule 2
O43157	PLXNB1	1253	1000	K.YTLDPN#ITSAGPTK.S	19.91	1.88	1.98	IPT/TIG 3	1252-1375	PLXB1_HUMAN Plexin-B1
O43194	GPR39	192	1000	R.GLTCN#R.S	40.55	-0.81	2.149			GPR39_HUMAN G-protein coupled receptor 39
O60487	MPZL2	39	1000	R.VLEAVN#GTDAR.L	14.1	-7.63	3.961	Ig-like V-type	27-141	MPZL2_HUMAN Myelin protein zero-like protein 2
O60603	TLR2	414	73.311	K.N#LTNIDISK.N	14.92	4.33	2.972			TLR2_HUMAN Toll-like receptor 2
O60637	TSPAN3	127	37.54	K.TYN#GTNPDAASR.A	10.82	-0.81	2.461			TSN3_HUMAN Tetraspanin-3
O60896	RAMP3	103	1000	R.QFFSN#CTVDR.V	18.74	-3.86	2.179			RAMP3_HUMAN Receptor activity-modifying protein 3
O75054	IGSF3	101	1000	R.VQGN#STLLHITDLQAR.D	>200	1.69	4.761	Ig-like C2-type 1	20-138	IGSF3_HUMAN Immunoglobulin superfamily member 3
O75054	IGSF3	655	24.437	K.NYN#NTWTR.L	109.5	-0.53	2.341	Ig-like C2-type 5	545-661	IGSF3_HUMAN Immunoglobulin superfamily member 3
O75054	IGSF3	700	52.725	K.RTLTLVENKPIQLN#CSVK.S	23.93	-1.11	6.579	Ig-like C2-type 6	676-803	IGSF3_HUMAN Immunoglobulin superfamily member 3
O75054	IGSF3	825	1000	R.LSQAQGN#LSVLETR.Q	12.2	0.43	4.865	Ig-like C2-type 7	813-945	IGSF3_HUMAN Immunoglobulin superfamily member 3
O75054	IGSF3	842	1000	R.QVQLECVVLN#R.T	12.32	-0.47	3.983	Ig-like C2-type 7	813-945	IGSF3_HUMAN Immunoglobulin superfamily member 3
O75144	ICOSLG	70	22.492	K.TVVTYHIPQN#SSLENVDSR.Y	>200	4.39	3.87	Ig-like V-type	19-129	ICOSL_HUMAN ICOS ligand
O75144	ICOSLG	102	1000	R.LFN#VTPQDEQK.F	16.47	3.41	2.412	Ig-like V-type	19-129	ICOSL_HUMAN ICOS ligand
O75882	ATRN	1073	1000	K.CIN#QSICEK.C	25.28	-4.56	2.684	Laminin EGF-like 1	1063-1108	ATRN_HUMAN Attractin
O75882	ATRN	1082	1000	K.CEN#LTTGK.H	55.72	-2.24	2.131	Laminin EGF-like 1	1063-1108	ATRN_HUMAN Attractin
O76082	SLC22A5	57	1000	R.CRVPDAAN#LSSAWR.N	47	-2.27	4.922			S22A5_HUMAN Solute carrier family 22 member 5
O76082	SLC22A5	91	1000	R.LATIAN#FSALGLEPGR.D	32.61	2.93	4.507			S22A5_HUMAN Solute carrier family 22 member 5
O94805	ACTL6B	159	1000	K.TAVLTAFAN#GR.S	>200	-1.78	2.845			ACL6B_HUMAN Actin-like protein 6B
O95084	PRSS23	207	1000	R.GAN#DSTSAMPEQMK.F	19.51	-1.72	2.516			PRS23_HUMAN Serine protease 23
O95136	S1PR2	19	1000	K.VQEHYN#YTK.E	28.67	-2.51	2.909			S1PR2_HUMAN Sphingosine 1-phosphate receptor 2
O95274	LYPD3	163	1000	R.EACQGTSPPVVSCYN#ASDHVYK.G	4.97	-5.27	3.541	UPAR/Ly6 2	140-222	LYPD3_HUMAN Ly6/PLAUR domain-containing protein 3
O95274	LYPD3	227	39.663	R.CNSDLRN#K.T	5.05	0.2	1.911			LYPD3_HUMAN Ly6/PLAUR domain-containing protein 3
O95297	MPZL1	50	1000	K.EIFVAN#GTQGK.L	5.36	3.3	3.682	Ig-like V-type	36-146	MPZL1_HUMAN Myelin protein zero-like protein 1
O95858	TSPAN15	189	71.753	R.N#TTEVVNTMCGYK.T	16.32	0.99	3.541			TSN15_HUMAN Tetraspanin-15
P01892	HLA-A	110	1000	R.GYYN#QSEAGSHTVQR.M	25.61	-0.33	3.782			1A02_HUMAN HLA class I histocompatibility antigen, A-2 alpha chain
P02786	TFRC	727	84.609	R.KQNNGAFN#ETLFR.N	14.46	1.25	5.659			TFR1_HUMAN Transferrin receptor protein 1
P04156	PRNP	197	1000	K.QHTVTTTTKGEN#FTETDVK.M	13.7	6.35	2.63			PRIO_HUMAN Major prion protein
P04406	GAPDH	9	1000	K.VGVN#GFGR.I	>200	-0.2	2.949			G3P_HUMAN Glyceraldehyde-3-phosphate dehydrogenase
P04406	GAPDH	225	1000	K.VIPELN#GK.L	>200	0.87	2.563			G3P_HUMAN Glyceraldehyde-3-phosphate dehydrogenase
P04626	ERBB2	530	1000	R.GHCWGPGPTQCVN#CSQFLR.G	>200	-2.68	5.416			ERBB2_HUMAN Receptor tyrosine-protein kinase erbB-2
P05026	ATP1B1	158	71.949	R.FKLEWLGN#CSGLNDETYGYK.E	19.58	-0.12	6.447			AT1B1_HUMAN Sodium/potassium-transporting ATPase subunit beta-1
P05026	ATP1B1	193	1000	R.VLGFKPKPPKN#ESLETYPVM*K.Y	23.52	0.39	3.694			AT1B1_HUMAN Sodium/potassium-transporting ATPase subunit beta-1
P05362	ICAM1	145	1000	R.AN#LTVVLLR.G	17.8	0.28	3.758	Ig-like C2-type 2	128-193	ICAM1_HUMAN Intercellular adhesion molecule 1
P05556	ITGB1	212	67.169	K.LRNPCTSEQN#CTSPFSYK.N	20.4	0.64	5.07	VWFA	140-378	ITB1_HUMAN Integrin beta-1
P05556	ITGB1	406	73.311	K.NGVN#GTGENGR.K	16.85	-0.07	4.846			ITB1_HUMAN Integrin beta-1
P05556	ITGB1	481	1000	K.CHEGN#GTFECGACR.C	20.83	-0.44	2.258			ITB1_HUMAN Integrin beta-1
P05556	ITGB1	520	107.317	R.KEN#SSEICSNNGECVCGQCVCR.K	74.77	8.68	4.45			ITB1_HUMAN Integrin beta-1
P05556	ITGB1	669	1000	K.KDTCTQECSYFN#ITKVESR.D	134.97	4.71	4.761			ITB1_HUMAN Integrin beta-1
P06213	INSR	920	1000	R.GLSPGN#YSVR.I	16.05	7.37	3.279	Fibronectin type-III 3	853-947	INSR_HUMAN Insulin receptor
P06731	CEACAM5	152	13.38	R.VYPELPKPSISSN#NSKPVEDK.D	14.7	-4.71	4.82	Ig-like 1	35-144	CEAM5_HUMAN Carcinoembryonic antigen-related cell adhesion molecule 5
P06731	CEACAM5	204	1000	R.TLTLFN#VTR.N	17.94	0.34	4.171	Ig-like 2	146-237	CEAM5_HUMAN Carcinoembryonic antigen-related cell adhesion molecule 5
P06731	CEACAM5	375	17.009	R.LQLSNDN#R.T	>200	-0.55	1.819	Ig-like 4	325-415	CEAM5_HUMAN Carcinoembryonic antigen-related cell adhesion molecule 5
P06731	CEACAM5	508	27.055	K.TITVSAELPKPSISSN#NSKPVEDK.D	18.02	7.27	7.008	Ig-like 6	502-593	CEAM5_HUMAN Carcinoembryonic antigen-related cell adhesion molecule 5
P06756	ITGAV	74	1000	K.AN#TTQPGIVEGGQVLK.C	10.19	0.39	2.69			ITAV_HUMAN Integrin alpha-V
P06756	ITGAV	554	1000	K.N#MTISR.G	15.48	-0.37	2.585			ITAV_HUMAN Integrin alpha-V
P06756	ITGAV	704	1000	R.LSCAFKTEN#QTR.Q	21.09	-0.67	3.857			ITAV_HUMAN Integrin alpha-V
P07339	CTSD	263	1000	K.GSLSYLN#VTRK.A	>200	-7.28	3.467	Peptidase A1	79-407	CATD_HUMAN_contaminant Cathepsin D
P07602	PSAP	101	1000	K.TCDWLPKPN#MSASCK.E	11.9	-1.57	2.393	Saposin B-type 1	59-142	SAP_HUMAN Prosaposin
P08069	IGF1R	747	1000	R.DVM*QVAN#TTMSSR.S	9.94	4.74	2.325	Fibronectin type-III 3	735-828	IGF1R_HUMAN Insulin-like growth factor 1 receptor
P08069	IGF1R	900	53.534	R.LNPGN#YTAR.I	12.97	-4.85	2.671	Fibronectin type-III 4	834-927	IGF1R_HUMAN Insulin-like growth factor 1 receptor
P08069	IGF1R	913	1000	R.IQATSLSGN#GSWTDPVFFYVQAK.T	15.47	0.49	3.242	Fibronectin type-III 4	834-927	IGF1R_HUMAN Insulin-like growth factor 1 receptor
P08174	CD55	95	1000	K.GSQWSDIEEFCN#R.S	>200	-0.26	1.526	Sushi 1	35-96	DAF_HUMAN Complement decay-accelerating factor
P08195	SLC3A2	365	1000	K.DASSFLAEWQN#ITK.G	25.17	-0.45	3.743			4F2_HUMAN 4F2 cell-surface antigen heavy chain
P08195	SLC3A2	381	106.4	K.GFSEDRLLIAGTN#SSDLQQILSLLESNK.D	22.71	0.01	6.299			4F2_HUMAN 4F2 cell-surface antigen heavy chain
P08195	SLC3A2	424	44.278	K.SLVTQYLN#ATGNR.W	35.24	-0.99	4.423			4F2_HUMAN 4F2 cell-surface antigen heavy chain
P08473	MME	145	1000	R.SCIN#ESAIDSR.G	94.42	1.15	2.095			NEP_HUMAN Neprilysin
P08648	ITGA5	593	1000	K.IYLRN#ESEFRDK.L	20.01	1.74	3.964			ITA5_HUMAN Integrin alpha-5
P08648	ITGA5	773	24.437	K.NLN#NSQSDVVSFR.L	19.7	3.55	3.183			ITA5_HUMAN Integrin alpha-5
P08648	ITGA5	868	27.121	R.VTGLN#CTTNHPINPK.G	85.28	-7.51	3.319			ITA5_HUMAN Integrin alpha-5
P09758	TACSTD2	120	61.56	K.ARQCN#QTSVCWCVNSVGVR.R	16.37	1.83	3.601	Thyroglublin type-1	70-145	TACD2_HUMAN Tumor-associated calcium signal transducer 2
P09758	TACSTD2	168	1000	R.HRPTAGAFN#HSDLDAELR.R	11.02	-5.54	1.991			TACD2_HUMAN Tumor-associated calcium signal transducer 2
P09758	TACSTD2	208	1000	K.FVAAVHYEQPTIQIELRQN#TSQK.A	6.23	-1.34	6.515			TACD2_HUMAN Tumor-associated calcium signal transducer 2
P10586	PTPRF	966	64.398	R.DINSQQELQN#ITTDTR.F	7.18	3.21	3.248	Fibronectin type-III 7	918-1010	PTPRF_HUMAN Receptor-type tyrosine-protein phosphatase F
P10909	CLU	86	1000	K.KKEDALN#ETRESETK.L	5.57	-0.98	1.687			CLUS_HUMAN Clusterin
P10909	CLU	291	1000	R.EIRHN#STGCLR.M	13.54	-0.41	2.335			CLUS_HUMAN Clusterin
P11047	LAMC1	1107	24.437	R.VN#NTLSSQISR.L	4.88	-4.47	3.113			LAMC1_HUMAN Laminin subunit gamma-1
P11047	LAMC1	1380	44.278	R.RVNDN#K.T	8.01	-0.1	2.963			LAMC1_HUMAN Laminin subunit gamma-1
P11047	LAMC1	1439	1000	K.N#ATSTK.A	3.84	0.3	2.56			LAMC1_HUMAN Laminin subunit gamma-1
P11166	SLC2A1	45	1000	K.VIEEFYN#QTWVHR.Y	15.74	-2.32	3.738			GTR1_HUMAN Solute carrier family 2, facilitated glucose transporter member 1
P11279	LAMP1	84	1000	R.SSCGKEN#TSDPSLVIAFGR.G	>200	4.24	3.122			LAMP1_HUMAN Lysosome-associated membrane glycoprotein 1
P11279	LAMP1	103	1000	R.GHTLTLN#FTR.N	>200	6.17	4.122			LAMP1_HUMAN Lysosome-associated membrane glycoprotein 1
P11279	LAMP1	249	1000	R.KDN#TTVTR.L	28.19	-1.95	2.566			LAMP1_HUMAN Lysosome-associated membrane glycoprotein 1
P11362	FGFR1	317	1000	K.TAGVN#TTDK.E	5.47	-0.26	1.53	Ig-like C2-type 3	255-357	FGFR1_HUMAN Fibroblast growth factor receptor 1
P11717	IGF2R	2085	1000	K.GYPCGGN#K.T	14.86	-6.38	1.725			MPRI_HUMAN Cation-independent mannose-6-phosphate receptor
P12821	ACE	146	84.359	K.RQQYNALLSN#MSR.I	>200	-1.96	5.973			ACE_HUMAN Angiotensin-converting enzyme
P12821	ACE	695	39.663	K.NMQIAN#HTLK.Y	>200	-7.84	2.8			ACE_HUMAN Angiotensin-converting enzyme
P13473	LAMP2	58	1000	R.YETTN#K.T	>200	-0.91	2.303			LAMP2_HUMAN Lysosome-associated membrane glycoprotein 2
P13473	LAMP2	275	1000	R.LN#SSTIK.Y	22.12	-0.04	2.856			LAMP2_HUMAN Lysosome-associated membrane glycoprotein 2
P13473	LAMP2	356	1000	R.VQPFN#VTQGK.Y	>200	-1.67	2.371			LAMP2_HUMAN Lysosome-associated membrane glycoprotein 2
P15151	PVR	105	1000	R.LGAELRN#ASLR.M	58.65	2.42	2.456	Ig-like V-type	24-139	PVR_HUMAN Poliovirus receptor
P15260	IFNGR1	179	1000	R.MN#GSEIQYK.I	3.75	4.66	2.612			INGR1_HUMAN Interferon gamma receptor 1
P16070	CD44	57	1000	K.AFN#STLPTM*AQMEK.A	11.29	6.9	2.535	Link	32-120	CD44_HUMAN CD44 antigen
P16144	ITGB4	695	1000	R.CSFRDEDDDCTYSYTMEGDGAPGPN#STVLVHK.K	19.9	7.35	3.042			ITB4_HUMAN Integrin beta-4
P16422	EPCAM	74	1000	K.AEMN#GSK.L	22.87	-0.01	2.116	Thyroglublin type-1	63-135	EPCAM_HUMAN Epithelial cell adhesion molecule
P16422	EPCAM	111	53.71	K.QCN#GTSMCWCVNTAGVR.R	9.93	1.09	2.588	Thyroglublin type-1	63-135	EPCAM_HUMAN Epithelial cell adhesion molecule
P17181	IFNAR1	81	1000	K.LSGCQN#ITSTK.C	3.83	-0.21	2.264	Fibronectin type-III 1	32-126	INAR1_HUMAN Interferon alpha/beta receptor 1
P17181	IFNAR1	172	1000	K.N#SSGVEER.I	17.06	0.01	2.412	Fibronectin type-III 2	127-227	INAR1_HUMAN Interferon alpha/beta receptor 1
P17301	ITGA2	105	65.263	K.LNLQTSTSIPN#VTEM*K.T	27.93	-2.28	2.647			ITA2_HUMAN Integrin alpha-2
P17301	ITGA2	343	1000	R.YFFN#VSDEAALLEK.A	21.11	-0.29	2.934	VWFA	188-365	ITA2_HUMAN Integrin alpha-2
P17301	ITGA2	1057	1000	R.TASCSN#VTCWLK.D	43.93	-1.54	2.497			ITA2_HUMAN Integrin alpha-2
P18564	ITGB6	463	1000	K.EVEVN#SSK.C	9.93	-1.37	1.73			ITB6_HUMAN Integrin beta-6
P19256	CD58	169	1000	R.N#STSIYFK.M	21.71	-0.06	4			LFA3_HUMAN Lymphocyte function-associated antigen 3
P20645	M6PR	57	1000	K.RLKPLFN#K.S	>200	4.6	3.507			MPRD_HUMAN Cation-dependent mannose-6-phosphate receptor
P20645	M6PR	83	106.4	R.EAGN#HTSGAGLVQINK.S	66.23	-8.67	4.574			MPRD_HUMAN Cation-dependent mannose-6-phosphate receptor
P21589	NT5E	53	1000	K.CVN#ASR.C	28.43	-0.69	1.815			5NTD_HUMAN 5'-nucleotidase
P21589	NT5E	333	1000	K.LDN#YSTQELGK.T	23.76	-0.97	3.094			5NTD_HUMAN 5'-nucleotidase
P21860	ERBB3	437	48.874	K.NLN#VTSLGFR.S	7.08	-0.92	3.99			ERBB3_HUMAN Receptor tyrosine-protein kinase erbB-3
P21860	ERBB3	522	1000	K.VCDPLCSSGGCWGPGPGQCLSCRN#YSR.G	4.26	-2.16	2.42			ERBB3_HUMAN Receptor tyrosine-protein kinase erbB-3
P22223	CDH3	566	1000	R.QVLN#ITDK.D	2.97	1.39	3.322	Cadherin 5	547-650	CADH3_HUMAN Cadherin-3
P22413	ENPP1	285	1000	K.MN#ASFSLK.S	25.21	5.66	3.149			ENPP1_HUMAN Ectonucleotide pyrophosphatase/phosphodiesterase family member 1
P22413	ENPP1	341	1000	K.MYN#GSVPFEER.I	47	3.1	3.054			ENPP1_HUMAN Ectonucleotide pyrophosphatase/phosphodiesterase family member 1
P22413	ENPP1	477	16.265	R.N#LSCREPNQHFKPYLK.H	16.88	9.54	4.137			ENPP1_HUMAN Ectonucleotide pyrophosphatase/phosphodiesterase family member 1
P23229	ITGA6	966	47.045	R.KYQTLN#CSVNVNCVNIR.C	>200	3.98	2.426			ITA6_HUMAN Integrin alpha-6
P25445	FAS	136	36.701	R.CKPNFFCN#STVCEHCDPCTK.C	45.16	0.7	4.539			TNR6_HUMAN Tumor necrosis factor receptor superfamily member 6
P26006	ITGA3	265	1000	K.N#ITIVTGAPR.H	36.06	0.17	3.919			ITA3_HUMAN Integrin alpha-3
P26006	ITGA3	511	1000	R.RN#ITLAYTLEADRDR.R	81.11	-1.89	4.517			ITA3_HUMAN Integrin alpha-3
P26006	ITGA3	969	37.54	R.TSIPTINMEN#K.T	27.53	-2.3	2.883			ITA3_HUMAN Integrin alpha-3
P26012	ITGB8	466	42.19	R.N#CSCQCEDNRGPK.G	6.99	0.28	2.234			ITB8_HUMAN Integrin beta-8
P27701	CD82	198	1000	K.GFCEAPGN#R.T	>200	-7.98	2.143			CD82_HUMAN CD82 antigen
P29323	EPHB2	482	1000	K.ELSEYN#ATAIK.S	20.83	-5.29	3.002	Fibronectin type-III 2	435-530	EPHB2_HUMAN Ephrin type-B receptor 2
P30464	HLA-B	110	1000	R.GYYN#QSEAGSHTLQR.M	11.61	-0.29	4.116			1B15_HUMAN HLA class I histocompatibility antigen, B-15 alpha chain
P30825	SLC7A1	226	84.359	K.NWQLTEEDFGN#TSGR.L	22.91	-0.04	2.779			CTR1_HUMAN High affinity cationic amino acid transporter 1
P30825	SLC7A1	235	24.437	R.LCLNN#DTK.E	14.43	9.7	2.979			CTR1_HUMAN High affinity cationic amino acid transporter 1
P30988	CALCR	91	1000	R.M*QQLPAYQGEGPYCN#R.T	>200	-6.99	1.89			CALCR_HUMAN Calcitonin receptor
P32004	L1CAM	294	20.167	R.VTYQNHN#K.T	10.46	-0.2	2.176	Ig-like C2-type 3	240-328	L1CAM_HUMAN Neural cell adhesion molecule L1
P32004	L1CAM	671	1000	K.VPGN#QTSTTLK.L	11.29	2.8	2.333	Fibronectin type-III 1	615-712	L1CAM_HUMAN Neural cell adhesion molecule L1
P32004	L1CAM	849	1000	R.GYN#VTYWR.E	13.28	1.3	3.412	Fibronectin type-III 3	814-916	L1CAM_HUMAN Neural cell adhesion molecule L1
P35052	GPC1	116	1000	R.SFDDHFQHLLN#DSER.T	28.39	5.22	4.966			GPC1_HUMAN Glypican-1
P35613	BSG	268	1000	K.ALM*N#GSESR.F	13.95	-0.47	1.726	Ig-like V-type	221-315	BASI_HUMAN Basigin
P35613	BSG	302	1000	R.CN#GTSSK.G	17.7	-7.03	2.641	Ig-like V-type	221-315	BASI_HUMAN Basigin
P36941	LTBR	177	1000	K.AGHFQN#TSSPSAR.C	>200	-7.83	1.642			TNR3_HUMAN Tumor necrosis factor receptor superfamily member 3
P40189	IL6ST	83	1000	K.EQYTIIN#R.T	15.88	3.47	2.142	Ig-like C2-type	26-120	IL6RB_HUMAN Interleukin-6 receptor subunit beta
P40189	IL6ST	131	104.477	K.N#LSCIVNEGK.K	7.16	-3.76	2.57	Fibronectin type-III 1	125-216	IL6RB_HUMAN Interleukin-6 receptor subunit beta
P42892	ECE1	166	1000	K.HLLEN#STASVSEAERK.A	16.24	8.61	5.33			ECE1_HUMAN Endothelin-converting enzyme 1
P42892	ECE1	187	1000	R.ACM*N#ETRIEELR.A	35.79	8.35	2.74			ECE1_HUMAN Endothelin-converting enzyme 1
P42892	ECE1	249	17.009	K.NSN#SNVIQVDQSGLGLPSR.D	13.92	-2.84	3.125			ECE1_HUMAN Endothelin-converting enzyme 1
P42892	ECE1	539	1000	R.FFN#FSWR.V	11.5	-1.47	3.214			ECE1_HUMAN Endothelin-converting enzyme 1
P48960	CD97	108	38.371	K.TFKN#ESENTCQDVDECQQNPR.L	22.32	-8.25	4.643	EGF-like 2 calcium-binding	64-115	CD97_HUMAN CD97 antigen
P48960	CD97	371	1000	R.GDKN#VTMGQSSAR.M	10.66	-0.06	3.775			CD97_HUMAN CD97 antigen
P50454	SERPINH1	120	1000	R.SLSN#STAR.N	17.1	-2.18	2.598			SERPH_HUMAN Serpin H1
P50895	BCAM	439	1000	R.TQN#FTLLVQGSPELK.T	8.42	-1.17	2.882	Ig-like C2-type 2	363-411	BCAM_HUMAN Basal cell adhesion molecule
P51795	CLCN5	408	23.624	K.LCDYENRFN#TSK.G	56.57	3.49	3.888			CLCN5_HUMAN H(+)/Cl(-) exchange transporter 5
P51805	PLXNA3	59	1000	K.LAPN#LTELR.A	>200	2.96	4.017	Sema	20-488	PLXA3_HUMAN Plexin-A3
P52569	SLC7A2	227	1000	K.N#ISASAR.E	6.49	-7.97	2.606			CTR2_HUMAN Low affinity cationic amino acid transporter 2
P52797	EFNA3	100	1000	R.TCN#ASQGFKR.W	10.41	-2.16	2.606	Ephrin RBD	30-169	EFNA3_HUMAN Ephrin-A3
P53801	PTTG1IP	54	78.156	K.N#VSCLWCNTNK.A	15.51	1.51	2.687	PSI	39-92	PTTG_HUMAN Pituitary tumor-transforming gene 1 protein-interacting protein
P54709	ATP1B3	124	1000	K.FLKPYTLEEQKN#LTVCPDGALFEQK.G	110.81	-3.07	5.567			AT1B3_HUMAN Sodium/potassium-transporting ATPase subunit beta-3
P55268	LAMB2	1249	1000	R.N#TSAASTAQLVEATEELRR.E	13.13	2.14	4.868			LAMB2_HUMAN Laminin subunit beta-2
P56159	GFRA1	59	1000	R.QCVAGKETN#FSLASGLEAKDECR.S	7.32	3.48	5.783			GFRA1_HUMAN GDNF family receptor alpha-1
P56159	GFRA1	152	24.437	K.GN#NCLDAAK.A	6.65	-1.05	2.992			GFRA1_HUMAN GDNF family receptor alpha-1
P56159	GFRA1	406	20.985	K.SN#VSGNTHLCISNGNYEK.E	8.4	-4.67	2.832			GFRA1_HUMAN GDNF family receptor alpha-1
P78536	ADAM17	103	1000	K.VVVVDGKN#ESEYTVK.W	7.53	-0.51	2.915			ADA17_HUMAN Disintegrin and metalloproteinase domain-containing protein 17
P78536	ADAM17	452	1000	K.MFSN#CSK.Q	30.68	8	2.096	Peptidase M12B	223-474	ADA17_HUMAN Disintegrin and metalloproteinase domain-containing protein 17
P78536	ADAM17	539	1000	K.KCQEAIN#ATCK.G	>200	-0.89	2.631	Disintegrin	475-563	ADA17_HUMAN Disintegrin and metalloproteinase domain-containing protein 17
P98160	HSPG2	89	1000	R.ALVN#FTR.S	>200	-0.52	2.28	SEA	80-191	PGBM_HUMAN Basement membrane-specific heparan sulfate proteoglycan core protein
Q02487	DSC2	392	1000	R.AN#YTILK.G	15.54	-1.99	2.187	Cadherin 3	356-471	DSC2_HUMAN Desmocollin-2
Q03405	PLAUR	194	1000	K.CCN#TTK.C	16.55	-9.81	1.54	UPAR/Ly6 2	115-213	UPAR_HUMAN Urokinase plasminogen activator surface receptor
Q04721	NOTCH2	46	32.218	R.DGYEPCVNEGMCVTYHN#GTGYCK.C	32.02	3.06	4.005	EGF-like 1	26-63	NOTC2_HUMAN Neurogenic locus notch homolog protein 2
Q07954	LRP1	357	1000	R.CDMDGQN#R.T	13.27	-0.56	2.946			LRP1_HUMAN Prolow-density lipoprotein receptor-related protein 1
Q07954	LRP1	2521	1000	R.AVN#SSCR.A	25.7	-0.4	2.667			LRP1_HUMAN Prolow-density lipoprotein receptor-related protein 1
Q07954	LRP1	3333	1000	R.TCVSN#CTASQFVCK.N	>200	-5.02	1.829	LDL-receptor class A 21	3332-3371	LRP1_HUMAN Prolow-density lipoprotein receptor-related protein 1
Q07954	LRP1	4364	1000	K.QSGDVTCN#CTDGR.V	8.71	-1.03	3.335	EGF-like 21	4340-4375	LRP1_HUMAN Prolow-density lipoprotein receptor-related protein 1
Q08334	IL10RB	161	1000	K.N#GTDEK.F	5.03	-0.3	1.656	Fibronectin type-III 2	114-216	I10R2_HUMAN Interleukin-10 receptor subunit beta
Q08722	CD47	73	1000	K.GRDIYTFDGALN#K.S	19.84	-4.24	5.972	Ig-like V-type	19-127	CD47_HUMAN Leukocyte surface antigen CD47
Q13308	PTK7	116	97.748	R.SAN#ASFNIK.W	10.04	-9.83	2.452	Ig-like C2-type 1	31-120	PTK7_HUMAN Inactive tyrosine-protein kinase 7
Q13332	PTPRS	733	1000	R.KVEAEALN#ATAIR.V	16.1	-0.96	5.051	Fibronectin type-III 5	723-831	PTPRS_HUMAN Receptor-type tyrosine-protein phosphatase S
Q13433	SLC39A6	67	17.009	R.YGEN#NSLSVEGFRK.L	12.55	0.83	2.747			S39A6_HUMAN Zinc transporter ZIP6
Q13433	SLC39A6	241	1000	K.TN#ESVSEPR.K	7.64	-9.15	3.425			S39A6_HUMAN Zinc transporter ZIP6
Q13444	ADAM15	237	1000	K.YRDFQHLLN#R.T	45.77	6.22	3.18	Peptidase M12B	213-414	ADA15_HUMAN Disintegrin and metalloproteinase domain-containing protein 15
Q13641	TPBG	81	1000	R.N#LTEVPTDLPAYVR.N	16.61	-0.36	4.5	LRRNT	53-91	TPBG_HUMAN Trophoblast glycoprotein
Q13641	TPBG	256	121.36	R.N#LTHLESLHLEDNALK.V	18.31	-2.04	4.019			TPBG_HUMAN Trophoblast glycoprotein
Q13641	TPBG	275	1000	K.VLHN#GTLAELQGLPHIR.V	13.08	-1.1	6.601			TPBG_HUMAN Trophoblast glycoprotein
Q13740	ALCAM	95	76.733	R.LNLSEN#YTLSISNAR.I	12.96	-0.09	4.615	Ig-like V-type 1	28-120	CD166_HUMAN CD166 antigen
Q13740	ALCAM	167	1000	K.KLGDCISEDSYPDGN#ITWYR.N	83.78	-0.79	6.082	Ig-like V-type 2	125-234	CD166_HUMAN CD166 antigen
Q13740	ALCAM	265	1000	K.EGDN#ITLK.C	104.52	2.7	3.374	Ig-like C2-type 1	245-328	CD166_HUMAN CD166 antigen
Q13740	ALCAM	306	1000	R.RN#ATGDYK.C	11.4	0.19	2.233	Ig-like C2-type 1	245-328	CD166_HUMAN CD166 antigen
Q13740	ALCAM	480	109.943	K.IIISPEEN#VTLTCTAENQLER.T	58.77	-0.04	5.09	Ig-like C2-type 3	416-501	CD166_HUMAN CD166 antigen
Q13740-2	ALCAM	499	76.733	R.TVNSLN#VSANENR.E	19.84	-8.7	3.44	Ig-like C2-type 3	416-501	CD166_HUMAN Isoform 2 of CD166 antigen
Q14126	DSG2	182	71.067	K.IN#ATDADEPNTLNSK.I	12.36	9.63	2.722	Cadherin 2	161-273	DSG2_HUMAN Desmoglein-2
Q14126	DSG2	462	1000	R.YVQN#GTYTVK.I	12.31	-0.82	3.135	Cadherin 4	389-503	DSG2_HUMAN Desmoglein-2
Q14542	SLC29A2	48	1000	R.LAGAGN#STAR.I	37.04	1.3	2.375			S29A2_HUMAN Equilibrative nucleoside transporter 2
Q14956	GPNMB	249	35.777	K.NDRN#SSDETFLK.D	>200	-1.04	4.386	PKD	240-327	GPNMB_HUMAN Transmembrane glycoprotein NMB
Q15043	SLC39A14	77	1000	R.GN#VTQHVQGHR.N	>200	-0.48	4.271			S39AE_HUMAN Zinc transporter ZIP14
Q15223	PVRL1	72	1000	K.STN#GSK.Q	12.48	-0.56	2.297	Ig-like V-type	31-141	PVRL1_HUMAN Poliovirus receptor-related protein 1
Q15223	PVRL1	202	17.009	R.NPN#GTVTVISR.Y	>200	3.59	2.543	Ig-like C2-type 1	149-238	PVRL1_HUMAN Poliovirus receptor-related protein 1
Q15223	PVRL1	297	1000	K.GVEAQN#R.T	22.49	-0.73	2.729	Ig-like C2-type 2	247-334	PVRL1_HUMAN Poliovirus receptor-related protein 1
Q15262	PTPRK	462	65.246	K.APQHVVNHLPPYTN#VSLK.M	51.8	4.15	4.717	Fibronectin type-III 2	392-488	PTPRK_HUMAN Receptor-type tyrosine-protein phosphatase kappa
Q15303	ERBB4	358	1000	K.FIN#CTK.I	6.61	1.12	2.373			ERBB4_HUMAN Receptor tyrosine-protein kinase erbB-4
Q15303	ERBB4	576	1000	K.MEDGLLTCHGPGPDN#CTK.C	19.14	2.82	3.082			ERBB4_HUMAN Receptor tyrosine-protein kinase erbB-4
Q15758	SLC1A5	212	1000	R.SYSTTYEERN#ITGTR.V	21.4	-9.26	4.491			AAAT_HUMAN Neutral amino acid transporter B(0)
Q15768	EFNB3	210	18.805	K.ENLPGDPTSN#ATSR.G	7.3	-0.71	2.048			EFNB3_HUMAN Ephrin-B3
Q15904	ATP6AP1	261	1000	K.QPVSPVIHPPVSYN#DTAPR.I	54.41	3	4.337			VAS1_HUMAN V-type proton ATPase subunit S1
Q29980	MICB	234	1000	R.N#ITLTWR.Q	6.85	-3.88	2.899	Ig-like C2-type	207-296	MICB_HUMAN MHC class I polypeptide-related sequence B
Q29983	MICA	79	1000	R.AKPQGQWAEDVLGN#KTWDRETR.D	11.91	0.46	6.357			MICA_HUMAN MHC class I polypeptide-related sequence A
Q29983	MICA	125	1000	R.VCEIHEDN#STR.S	57.49	-2.94	2.672			MICA_HUMAN MHC class I polypeptide-related sequence A
Q29983	MICA	210	1000	R.TVPPMVN#VTR.S	>200	1.76	2.716	Ig-like C1-type	207-296	MICA_HUMAN MHC class I polypeptide-related sequence A
Q29983	MICA	220	1000	R.SEASEGN#ITVTCR.A	10.74	-0.59	3.427	Ig-like C2-type	207-296	MICA_HUMAN MHC class I polypeptide-related sequence A
Q3MIR4	TMEM30B	273	1000	R.IRQGN#YSAGLPR.G	39.07	4.44	5.167			CC50B_HUMAN Cell cycle control protein 50B
Q3MIR4	TMEM30B	286	36.556	R.GAYRVN#ITYNYPVR.A	>200	-0.77	3.865			CC50B_HUMAN Cell cycle control protein 50B
Q4KMQ2	ANO6	493	30.835	K.NIN#GTDPIQK.Y	22.65	5.96	2.938			ANO6_HUMAN Anoctamin-6
Q4KMQ2	ANO6	802	29.667	K.GNPYSDLGN#HTTCR.Y	>200	-0.19	1.937			ANO6_HUMAN Anoctamin-6
Q58DX5	NAALADL2	295	37.54	K.N#VTNQIALLK.L	22.36	-2.16	2.875			NADL2_HUMAN Inactive N-acetylated-alpha-linked acidic dipeptidase-like protein 2
Q58DX5	NAALADL2	556	48.874	K.NNFN#CTR.R	19.87	-8.06	2.231			NADL2_HUMAN Inactive N-acetylated-alpha-linked acidic dipeptidase-like protein 2
Q58EX2	SDK2	577	1000	R.VISAGGN#DSR.S	29.81	0.35	2.446	Ig-like C2-type 6	496-585	SDK2_HUMAN Protein sidekick-2
Q5HYA8	TMEM67	179	1000	R.CEPTFVN#TSR.S	41.97	-7.23	1.94			MKS3_HUMAN Meckelin
Q5MY95	ENTPD8	135	1000	R.KN#SSQAR.D	55.49	-1.1	2.034			ENTP8_HUMAN Ectonucleoside triphosphate diphosphohydrolase 8
Q5SZK8	FREM2	2121	1000	K.ATVSIN#DSVSDLPK.M	5.6	6.64	1.987	Calx-beta 4	2118-2220	FREM2_HUMAN FRAS1-related extracellular matrix protein 2
Q5VU97	CACHD1	329	24.437	R.STNN#NTK.F	13.84	-0.77	3.064	VWFA	228-443	CAHD1_HUMAN VWFA and cache domain-containing protein 1
Q5ZPR3	CD276	91	1000	K.QLVHSFAEGQDQGSAYAN#R.T	14.86	3.78	4.905	Ig-like V-type 1	29-139	CD276_HUMAN CD276 antigen
Q5ZPR3	CD276	104	1000	R.TALFPDLLAQGN#ASLR.L	18.59	-1.17	3.712	Ig-like V-type 1	29-139	CD276_HUMAN CD276 antigen
Q5ZPR3	CD276	215	1000	R.VVLGAN#GTYSCLVR.N	26.63	0.3	2.795	Ig-like C2-type 1	145-238	CD276_HUMAN CD276 antigen
Q658P3	STEAP3	344	1000	K.QVLAN#K.S	18.19	-0.67	2.576			STEA3_HUMAN Metalloreductase STEAP3
Q6EMK4	VASN	117	1000	R.LHEITN#ETFR.G	>200	3.9	3.23			VASN_HUMAN Vasorin
Q6H3X3	RAET1G	82	1000	K.KLN#VTTAWK.A	12.06	-2.86	5.72			RET1G_HUMAN Retinoic acid early transcript 1G protein
Q6P4Q7	CNNM4	85	33.657	R.LYGYSLGN#ISSNLISFTEVDDAETLHK.S	30.34	-1.24	5.844			CNNM4_HUMAN Metal transporter CNNM4
Q6P4Q7	CNNM4	127	1000	R.GN#TSGVLVVLTK.F	38.62	-0.15	2.826			CNNM4_HUMAN Metal transporter CNNM4
Q6UXD5	SEZ6L2	641	1000	K.EVPRN#DTCPELPPPEWGWR.T	16.43	-1.57	3.722			SE6L2_HUMAN Seizure 6-like protein 2
Q6UXI9	NPNT	273	1000	K.GN#GTILK.G	9.14	-4.19	1.694			NPNT_HUMAN Nephronectin
Q6YHK3	CD109	118	1000	R.TQDEILFSN#STR.L	8.03	0.36	3.255			CD109_HUMAN CD109 antigen
Q6YHK3	CD109	419	1000	K.IN#YTVPQSGTFK.I	7.42	5.3	2.83			CD109_HUMAN CD109 antigen
Q6ZMP0	THSD4	709	1000	R.QVYAN#R.S	8.64	-1.52	1.831	TSP type-1 2	676-737	THSD4_HUMAN Thrombospondin type-1 domain-containing protein 4
Q6ZUK4	TMEM26	110	52.403	R.KEDFN#QTLTSNEQTSR.A	14.2	-7.52	2.082			TMM26_HUMAN Transmembrane protein 26
Q7Z5N4	SDK1	1767	1000	K.N#LTSHTK.Y	25.5	-1.72	1.93	Fibronectin type-III 11	1704-1800	SDK1_HUMAN Protein sidekick-1
Q86SQ4	GPR126	143	1000	K.GFN#ASYIR.V	23.83	9.36	2.48	CUB	41-149	GP126_HUMAN G-protein coupled receptor 126
Q86SQ4	GPR126	505	24.437	K.NN#ESLDEGLR.L	10.55	8.14	3.828			GP126_HUMAN G-protein coupled receptor 126
Q86WC4	OSTM1	135	1000	R.AAGN#TSESQSCAR.S	>200	-1.39	4.373			OSTM1_HUMAN Osteopetrosis-associated transmembrane protein 1
Q8IWA5	SLC44A2	417	132.105	K.TCNPETFPSSN#ESR.Q	127.09	-0.39	5.22			CTL2_HUMAN Choline transporter-like protein 2
Q8IWT6	LRRC8A	66	1000	K.DSCN#DSFR.G	15.63	-0.13	2.044			LRC8A_HUMAN Leucine-rich repeat-containing protein 8A
Q8IWU5	SULF2	171	1000	R.FYN#YTLCR.N	5.76	-1.83	2.678			SULF2_HUMAN Extracellular sulfatase Sulf-2
Q8N0Z9	VSIG10	347	1000	R.N#LTQPEVIIQPSSR.H	18.72	-6.74	3.788	Ig-like C2-type 4	311-404	VSI10_HUMAN V-set and immunoglobulin domain-containing protein 10
Q8N271	PROM2	725	1000	R.N#VSECFLAR.E	17.92	4.18	3.001			PROM2_HUMAN Prominin-2
Q8N441	FGFRL1	231	1000	R.AGAIN#ATYK.V	14.68	0.34	2.026	Ig-like C2-type 2	147-237	FGRL1_HUMAN Fibroblast growth factor receptor-like 1
Q8N6C5	IGSF1	1223	1000	K.GIGN#YSCSYR.L	>200	-5.46	3.921	Ig-like C2-type 12	1161-1242	IGSF1_HUMAN Immunoglobulin superfamily member 1
Q8N8Z6	DCBLD1	64	47.574	K.NYPGTYPN#HTVCEK.T	8.96	7.68	3.408	CUB	41-150	DCBD1_HUMAN Discoidin, CUB and LCCL domain-containing protein 1
Q8NC42	RNF149	131	88.819	R.RN#ASAVVLYNEER.Y	>200	-1.43	3.508	PA	67-175	RN149_HUMAN E3 ubiquitin-protein ligase RNF149
Q8NFZ8	CADM4	67	1000	R.QTLFFN#GTR.A	25.79	5.58	3.834	Ig-like V-type	21-119	CADM4_HUMAN Cell adhesion molecule 4
Q8TAB3	PCDH19	546	1000	K.DGGLPSLQSN#ATVR.V	12.49	-2.29	2.812	Cadherin 5	454-563	PCD19_HUMAN Protocadherin-19
Q8WWY8	LIPH	357	1000	K.AGN#TTESK.I	18.43	-1.15	2.227			LIPH_HUMAN Lipase member H
Q8WXI7	MUC16	12416	1000	R.KFN#TTER.V	54.28	-1.21	1.693	SEA 3	12368-12504	MUC16_HUMAN Mucin-16
Q92508	PIEZO1	2294	1000	R.ELYN#GTADITLR.F	38.97	8.46	3.79			PIEZ1_HUMAN Piezo-type mechanosensitive ion channel component 1
Q92508	PIEZO1	2331	1000	K.HM*LALAPN#STAR.R	33.47	0.68	2.011			PIEZ1_HUMAN Piezo-type mechanosensitive ion channel component 1
Q92542	NCSTN	387	1000	R.TSLELWM*HTDPVSQKN#ESVR.N	61.08	0.06	4.161			NICA_HUMAN Nicastrin
Q92542	NCSTN	417	1000	R.RPN#QSQPLPPSSLQR.F	108.78	-1.59	3.755			NICA_HUMAN Nicastrin
Q92542	NCSTN	612	1000	K.DLYEYSWVQGPLHSN#ETDRLPR.C	26.92	-1.4	4.717			NICA_HUMAN Nicastrin
Q92823	NRCAM	223	1000	R.FN#HTQTIQQK.Q	28.36	-0.59	2.989	Ig-like 2	141-235	NRCAM_HUMAN Neuronal cell adhesion molecule
Q92823	NRCAM	276	45.026	R.ERPPTFLTPEGN#ASNK.E	21.65	0.96	4.873	Ig-like 3	267-356	NRCAM_HUMAN Neuronal cell adhesion molecule
Q92823	NRCAM	858	28.934	R.VNVVN#STLAEVHWDPVPLK.S	15.33	-0.47	4.535	Fibronectin type-III 3	848-950	NRCAM_HUMAN Neuronal cell adhesion molecule
Q92823	NRCAM	1019	48.874	K.NLN#FSTR.Y	21.64	-2.53	2.794	Fibronectin type-III 4	954-1051	NRCAM_HUMAN Neuronal cell adhesion molecule
Q92854	SEMA4D	379	71.753	R.AAN#YTSSLNLPDK.T	9.71	4.88	1.967	Sema	22-500	SEM4D_HUMAN Semaphorin-4D
Q96HA4	C1orf159	128	1000	R.SFAGPGAPFPMN#R.S	32.03	2.9	3.621			CA159_HUMAN Uncharacterized protein C1orf159
Q96K49	TMEM87B	68	1000	K.TMFN#STDIK.L	>200	0.87	2.068			TM87B_HUMAN Transmembrane protein 87B
Q96NT5	SLC46A1	58	1000	R.FSADLGYN#GTR.Q	37.88	-0.92	4.065			PCFT_HUMAN Proton-coupled folate transporter
Q96NY8	PVRL4	281	1000	K.CLSEGQPPPSYN#WTR.L	27.56	-1.95	1.664	Ig-like C2-type 2	248-331	PVRL4_HUMAN Poliovirus receptor-related protein 4
Q96QE2	SLC2A13	433	1000	R.ITFKPIAPSGQN#ATCTR.Y	>200	4.28	2.757			MYCT_HUMAN Proton myo-inositol cotransporter
Q96RD7	PANX1	255	1000	K.SGILRN#DSTVPDQFQCK.L	25.11	3.2	3.627			PANX1_HUMAN Pannexin-1
Q99523	SORT1	162	24.437	K.DITDLIN#NTFIR.T	7.5	0.92	4.376			SORT_HUMAN Sortilin
Q99571	P2RX4	75	1000	K.GVAVTN#TSK.L	37.56	-0.69	2.117			P2RX4_HUMAN P2X purinoceptor 4
Q9BY67	CADM1	101	1000	R.FQLLN#FSSSELK.V	10.54	-1.41	4.664	Ig-like V-type	45-139	CADM1_HUMAN Cell adhesion molecule 1
Q9BY67	CADM1	113	1000	K.VSLTN#VSISDEGR.Y	36.89	5.67	4.015	Ig-like V-type	45-139	CADM1_HUMAN Cell adhesion molecule 1
Q9C0C4	SEMA4C	106	24.437	K.NN#QTECFNFIR.F	11.02	3.55	4.095	Sema	30-497	SEM4C_HUMAN Semaphorin-4C
Q9C0C4	SEMA4C	121	1000	R.FLQPYN#ASHLYVCGTYAFQPK.C	11.44	0.99	3.67	Sema	30-497	SEM4C_HUMAN Semaphorin-4C
Q9C0C4	SEMA4C	522	1000	R.DPYCAWSVN#TSR.C	16.73	-2.13	3.546	PSI	499-551	SEM4C_HUMAN Semaphorin-4C
Q9H0U3	MAGT1	71	1000	K.APPRN#YSVIVMFTALQLHR.Q	34.72	-0.05	7.212	Thioredoxin	47-175	MAGT1_HUMAN Magnesium transporter protein 1
Q9H0X4	ITFG3	389	1000	R.YKPDTLAVAVEN#GTGTDR.Q	17.73	5.56	5.613			ITFG3_HUMAN Protein ITFG3
Q9HC56	PCDH9	450	1000	K.IVASDSGKPSLN#QTALVR.V	11.28	1.97	3.632	Cadherin 4	365-469	PCDH9_HUMAN Protocadherin-9
Q9HCN3	TMEM8A	535	1000	R.GWSCTDN#STAQTVAQQR.A	23.49	0.3	2.113			TMM8A_HUMAN Transmembrane protein 8A
Q9HCU4	CELSR2	1036	20.167	R.LLDRNDNPPVLGNFEILFNNYVTN#R.S	9.55	0.53	9.089	Cadherin 9	1028-1146	CELR2_HUMAN Cadherin EGF LAG seven-pass G-type receptor 2
Q9HCU4	CELSR2	1076	115.01	R.GNELSLVLLN#ASTGELK.L	6.54	2.56	4.733	Cadherin 9	1028-1146	CELR2_HUMAN Cadherin EGF LAG seven-pass G-type receptor 2
Q9HCU4	CELSR2	1741	1000	R.LHGLHLSN#ITVGGIPGPAGGVAR.G	46.98	-1.95	4.327	Laminin G-like 2	1614-1971	CELR2_HUMAN Cadherin EGF LAG seven-pass G-type receptor 2
Q9HCU4	CELSR2	1900	1000	K.GFDPDCN#K.T	5.19	-6.28	2.261	EGF-like 7	1883-1922	CELR2_HUMAN Cadherin EGF LAG seven-pass G-type receptor 2
Q9HCU4	CELSR2	2043	1000	R.N#ESGLDSGR.S	9.17	-2.37	3.454			CELR2_HUMAN Cadherin EGF LAG seven-pass G-type receptor 2
Q9HCU4	CELSR2	2061	1000	R.N#ATQHTAGYFGSDVK.V	10.06	7.59	2.778			CELR2_HUMAN Cadherin EGF LAG seven-pass G-type receptor 2
Q9HDC9	APMAP	160	1000	R.AGPN#GTLFVADAYK.G	11.16	-1.93	2.983			APMAP_HUMAN Adipocyte plasma membrane-associated protein
Q9NPH3	IL1RAP	118	1000	R.N#TTYCSK.V	13.93	-0.83	2.247	Ig-like C2-type 1	21-128	IL1AP_HUMAN Interleukin-1 receptor accessory protein
Q9NPR2	SEMA4B	405	1000	R.KIN#SSLQLPDR.V	19.13	-3.9	3.703	Sema	42-518	SEM4B_HUMAN Semaphorin-4B
Q9NYQ6	CELSR1	1576	1000	K.DIGN#YSCAAQGTQTGSKK.S	7.21	2.14	4.152	Laminin G-like 1	1442-1646	CELR1_HUMAN Cadherin EGF LAG seven-pass G-type receptor 1
Q9NYQ6	CELSR1	2122	1000	K.LSRN#ETQVDGAR.A	16.38	-0.5	3.746			CELR1_HUMAN Cadherin EGF LAG seven-pass G-type receptor 1
Q9P055	JKAMP	37	1000	K.N#GSTEIYGECGVCPR.G	12.68	1.23	1.518			JKAMP_HUMAN JNK1/MAPK8-associated membrane protein
Q9P2B2	PTGFRN	286	1000	K.N#VSVAEGK.E	15.55	-0.5	2.379	Ig-like C2-type 3	276-394	FPRP_HUMAN Prostaglandin F2 receptor negative regulator
Q9P2B2	PTGFRN	600	1000	R.YSVLIM*AEKPVGDLSSPN#ETK.Y	10.55	-1.69	4.472	Ig-like C2-type 5	544-662	FPRP_HUMAN Prostaglandin F2 receptor negative regulator
Q9UGT4	SUSD2	162	1000	K.SELVN#ETR.W	>200	-8.16	2.751			SUSD2_HUMAN Sushi domain-containing protein 2
Q9UGT4	SUSD2	494	1000	R.AQPGTMSN#GTETR.G	29.95	-0.77	2.699	VWFD	446-667	SUSD2_HUMAN Sushi domain-containing protein 2
Q9UHN6	TMEM2	171	1000	K.DGSRN#ITLR.T	21.68	3.15	1.923	G8	121-245	TMEM2_HUMAN Transmembrane protein 2
Q9UHN6	TMEM2	292	1000	K.ILESERFDTHEYRN#ESR.R	130.82	7.31	3.252			TMEM2_HUMAN Transmembrane protein 2
Q9UHN6	TMEM2	739	1000	K.TTN#SSAADPR.E	20.88	-0.34	3.322			TMEM2_HUMAN Transmembrane protein 2
Q9UHN6	TMEM2	1092	1000	R.QN#GSLSK.I	7.86	-0.75	1.936			TMEM2_HUMAN Transmembrane protein 2
Q9UIG8	SLCO3A1	153	1000	R.WGAEGRDVCAAN#GSGGDEGPDPDLICR.N	11.51	3.2	2.711			SO3A1_HUMAN Solute carrier organic anion transporter family member 3A1
Q9UIW2	PLXNA1	77	1000	K.LSGN#LTLLR.A	8.09	-0.7	3.744	Sema	27-512	PLXA1_HUMAN Plexin-A1
Q9UIW2	PLXNA1	1043	1000	K.YN#YTEDPTILR.I	8.63	-2.66	2.365	IPT/TIG 2	961-104	PLXA1_HUMAN Plexin-A1
Q9ULF5	SLC39A10	339	45.825	K.DLNEDDHHHECLN#VTQLLK.Y	52.95	1.09	2.63			S39AA_HUMAN Zinc transporter ZIP10
Q9ULI3	HEG1	1080	1000	K.RTFLN#TTVEK.H	>200	0.96	3.459			HEG1_HUMAN Protein HEG homolog 1
Q9UM47	NOTCH3	1179	1000	R.CLHN#GTCVDLVGGFR.C	18.68	0.75	4.657	EGF-like 30	1160-1203	NOTC3_HUMAN Neurogenic locus notch homolog protein 3
Q9UN76	SLC6A14	155	1000	K.N#CSSWSDK.N	11.8	4.38	2.025			S6A14_HUMAN Sodium- and chloride-dependent neutral and basic amino acid transporter B(0+)
Q9UN76	SLC6A14	174	30.612	R.SPIVTHCN#VSTVNK.G	29.86	-2.7	2.866			S6A14_HUMAN Sodium- and chloride-dependent neutral and basic amino acid transporter B(0+)
Q9UN76	SLC6A14	189	1000	K.GIQEIIQM*N#K.S	18.89	-0.05	3.121			S6A14_HUMAN Sodium- and chloride-dependent neutral and basic amino acid transporter B(0+)
Q9UP38	FZD1	231	1000	K.FPVHGAGELCVGQN#TSDK.G	21.51	4	3.437			FZD1_HUMAN Frizzled-1
Q9Y4D7	PLXND1	500	48.874	K.INLN#ESMQVVSR.R	21.21	6.55	4.349	Sema	47-546	PLXD1_HUMAN Plexin-D1
Q9Y4D7	PLXND1	696	1000	K.AN#FTIYDCSR.T	>200	-0.72	3.349			PLXD1_HUMAN Plexin-D1
Q9Y4L1	HYOU1	515	1000	R.VFGSQN#LTTVK.L	22.33	-4.82	3.61			HYOU1_HUMAN Hypoxia up-regulated protein 1
Q9Y4L1	HYOU1	869	1000	K.N#ATLAEQAK.L	>200	0.9	2.771			HYOU1_HUMAN Hypoxia up-regulated protein 1
Q9Y5L3	ENTPD2	129	31.275	R.LLN#LTNPEASTSVLMAVTHTLTQYPFDFR.G	9.36	-0.43	5.059			ENTP2_HUMAN Ectonucleoside triphosphate diphosphohydrolase 2
Q9Y5Y6	ST14	485	1000	R.CDGWADCTDHSDELN#CSCDAGHQFTCK.N	9.68	4.96	4.449	LDL-receptor class A 1	452-487	ST14_HUMAN Suppressor of tumorigenicity 14 protein
Q9Y639	NPTN	197	73.311	K.N#ASNMEYR.I	18.19	-0.18	3.03	Ig-like 2	148-235	NPTN_HUMAN Neuroplastin
Q9Y639	NPTN	229	1000	K.AN#ATIEVK.A	20.03	-3.71	2.871	Ig-like 2	148-235	NPTN_HUMAN Neuroplastin
Q9Y6M7	SLC4A7	786	49.59	K.DN#ITAHNISWR.N	22.52	9.44	3.883			S4A7_HUMAN Sodium bicarbonate cotransporter 3
Q9Y6M7	SLC4A7	796	1000	R.N#LTVSECK.K	30.61	-2.17	2.366			S4A7_HUMAN Sodium bicarbonate cotransporter 3
