# Supplementary material for: Quantitative investigation of human cell surface N-glycoprotein dynamics
Source: Royal Society of Chemistry journal article supplement (doi:10.1039/c6sc01814a), 2016-08-15
Supplement: c6sc01814a7.xlsx [file c6sc01814a7.xlsx]

## Sheet: Sites Quantified
Table S4 - The Half-Lives of 318 Unique Glycosylation Sites in Expt# 2
Uniprot ID	Gene Symbol	Site	ModScore	ModScore Peptide	Half-Life (h)	PPM	XCorr	Domain Name	Domain Range	Annotation
A8MWY0	KIAA1324L	560	1000	K.N#ATFTFTWAFQR.T	150.64	2.24	4.228			K132L_HUMAN UPF0577 protein KIAA1324-like
O14494	PPAP2A	142	1000	K.IN#CSDGYIEYYICR.G	15.81	2.09	2.133			LPP1_HUMAN Lipid phosphate phosphohydrolase 1
O14672	ADAM10	439	1000	R.N#ISQVLEK.K	21.36	0.66	3.521	Peptidase M12B	220-456	ADA10_HUMAN Disintegrin and metalloproteinase domain-containing protein 10
O14786	NRP1	150	1000	K.RGPECSQN#YTTPSGVIK.S	6.38	-0.14	1.967	CUB 2	147-265	NRP1_HUMAN Neuropilin-1
O14786	NRP1	522	24.437	K.IGYSNN#GSDWK.M	4.65	0.03	2.136	F5/8 type C2	431-583	NRP1_HUMAN Neuropilin-1
O15031	PLXNB2	127	1000	R.ALSN#ISLR.L	19.55	-0.1	2.429	Sema	20-466	PLXB2_HUMAN Plexin-B2
O15031	PLXNB2	528	1000	K.SCVAVTSAQPQN#MSR.R	105.03	-0.17	2.105			PLXB2_HUMAN Plexin-B2
O15031	PLXNB2	733	1000	K.LSHDAN#ETLPLHLYVK.S	12.57	-1.12	5.692			PLXB2_HUMAN Plexin-B2
O15031	PLXNB2	1049	1000	R.EAESLQPM*TVVGTDYVFHN#DTK.V	9.19	0.81	3.719	IPT/TIG 3	983-1092	PLXB2_HUMAN Plexin-B2
O15230	LAMA5	2196	1000	R.GIN#ASSMAWAR.L	10.45	-0.81	2.632			LAMA5_HUMAN Laminin subunit alpha-5
O15230	LAMA5	2423	1000	R.KQELSRDN#ATLQATLHAAR.D	32.23	0.97	3.856			LAMA5_HUMAN Laminin subunit alpha-5
O15230	LAMA5	3107	1000	K.RLN#TTGVSAGCTADLLVGR.A	17.94	-0.53	4.797	Laminin G-like 2	2941-3115	LAMA5_HUMAN Laminin subunit alpha-5
O15394	NCAM2	219	1000	K.SFN#ATAERGEEMTFSCR.A	>200	-0.54	4.045	Ig-like C2-type 3	208-297	NCAM2_HUMAN Neural cell adhesion molecule 2
O15394	NCAM2	474	39.663	R.YN#CTATNHIGTR.F	>200	-1.05	2.86	Ig-like C2-type 5	401-491	NCAM2_HUMAN Neural cell adhesion molecule 2
O15394	NCAM2	562	18.805	R.SHGVQTM*VVLNNLEPN#TTYEIR.V	113.18	0.42	5.265	Fibronectin type-III 1	498-591	NCAM2_HUMAN Neural cell adhesion molecule 2
O43157	PLXNB1	1253	1000	K.YTLDPN#ITSAGPTK.S	13.34	-1.12	1.828	IPT/TIG 3	1252-1375	PLXB1_HUMAN Plexin-B1
O43688	PPAP2C	139	1000	R.VN#CSVYVQLEK.V	48.15	1.16	2.566			LPP2_HUMAN Lipid phosphate phosphohydrolase 2
O60487	MPZL2	39	1000	R.VLEAVN#GTDAR.L	12.45	-0.15	4.38	Ig-like V-type	27-141	MPZL2_HUMAN Myelin protein zero-like protein 2
O60637	TSPAN3	127	24.243	K.TYN#GTNPDAASR.A	11.02	-0.15	1.809			TSN3_HUMAN Tetraspanin-3
O60814	HIST1H2BK	64	20.167	K.AMGIMN#SFVNDIFER.I	>200	-0.06	2.238			H2B1K_HUMAN Histone H2B type 1-K
O60896	RAMP3	103	1000	R.QFFSN#CTVDR.V	17.05	-1.2	3.09			RAMP3_HUMAN Receptor activity-modifying protein 3
O75054	IGSF3	101	1000	R.VQGN#STLLHITDLQAR.D	>200	4.03	3.094	Ig-like C2-type 1	20-138	IGSF3_HUMAN Immunoglobulin superfamily member 3
O75054	IGSF3	825	1000	R.LSQAQGN#LSVLETR.Q	15.32	2.53	1.919	Ig-like C2-type 7	813-945	IGSF3_HUMAN Immunoglobulin superfamily member 3
O75054	IGSF3	842	1000	R.QVQLECVVLN#R.T	9.91	0.21	3.477	Ig-like C2-type 7	813-945	IGSF3_HUMAN Immunoglobulin superfamily member 3
O75054	IGSF3	961	1000	K.RAEDTAGQTALTVMRPDASLQVDTVVPN#ATVSEK.A	12.51	-0.11	2.19	Ig-like C2-type 6	949-1097	IGSF3_HUMAN Immunoglobulin superfamily member 3
O75144	ICOSLG	70	15.381	K.TVVTYHIPQN#SSLENVDSR.Y	>200	-0.17	3.34	Ig-like V-type	19-129	ICOSL_HUMAN ICOS ligand
O75144	ICOSLG	102	1000	R.LFN#VTPQDEQK.F	16.37	0.57	1.861	Ig-like V-type	19-129	ICOSL_HUMAN ICOS ligand
O75882	ATRN	1082	1000	K.CEN#LTTGK.H	51.73	-3.08	1.831	Laminin EGF-like 1	1063-1108	ATRN_HUMAN Attractin
O75954	TSPAN9	180	1000	R.N#ATTPLWR.T	23.66	-0.21	2.189			TSN9_HUMAN Tetraspanin-9
O76082	SLC22A5	57	1000	R.CRVPDAAN#LSSAWR.N	35.77	0.01	4.61			S22A5_HUMAN Solute carrier family 22 member 5
O95084	PRSS23	207	1000	R.GAN#DSTSAMPEQMK.F	17	-0.97	1.9			PRS23_HUMAN Serine protease 23
O95136	S1PR2	19	1000	K.VQEHYN#YTK.E	29.24	-2	3.323			S1PR2_HUMAN Sphingosine 1-phosphate receptor 2
O95196	CSPG5	355	1000	R.DLASSEN#GTECR.S	19.88	-0.3	2.145			CSPG5_HUMAN Chondroitin sulfate proteoglycan 5
O95274	LYPD3	118	1000	K.LN#LTSR.A	5.91	-0.37	2.029	UPAR/Ly6 1	33-126	LYPD3_HUMAN Ly6/PLAUR domain-containing protein 3
O95274	LYPD3	163	1000	R.EACQGTSPPVVSCYN#ASDHVYK.G	4.33	-0.18	3.164	UPAR/Ly6 2	140-222	LYPD3_HUMAN Ly6/PLAUR domain-containing protein 3
O95274	LYPD3	227	39.663	R.CNSDLRN#K.T	5.23	0.37	2.187			LYPD3_HUMAN Ly6/PLAUR domain-containing protein 3
O95297	MPZL1	50	1000	K.EIFVAN#GTQGK.L	5.92	-0.48	3.12	Ig-like V-type	36-146	MPZL1_HUMAN Myelin protein zero-like protein 1
O95857	TSPAN13	137	17.009	R.SVNPN#DTCLASCVK.S	9.53	-0.1	3.365			TSN13_HUMAN Tetraspanin-13
O95858	TSPAN15	189	71.753	R.N#TTEVVNTMCGYK.T	7.97	-0.02	2.855			TSN15_HUMAN Tetraspanin-15
P01892	HLA-A	110	1000	R.GYYN#QSEAGSHTVQR.M	18.24	-0.34	2.732			1A02_HUMAN HLA class I histocompatibility antigen, A-2 alpha chain
P02786	TFRC	251	1000	K.DFEDLYTPVN#GSIVIVR.A	17.23	1.09	1.579	PA	223-313	TFR1_HUMAN Transferrin receptor protein 1
P02786	TFRC	727	84.609	R.KQNNGAFN#ETLFR.N	14.9	0.12	2.877			TFR1_HUMAN Transferrin receptor protein 1
P04156	PRNP	197	1000	K.QHTVTTTTKGEN#FTETDVK.M	13.87	0.83	3.097			PRIO_HUMAN Major prion protein
P04406	GAPDH	9	1000	K.VGVN#GFGR.I	>200	0.87	2.754			G3P_HUMAN Glyceraldehyde-3-phosphate dehydrogenase
P04406	GAPDH	225	1000	K.VIPELN#GK.L	>200	-1.12	2.502			G3P_HUMAN Glyceraldehyde-3-phosphate dehydrogenase
P04626	ERBB2	530	1000	R.GHCWGPGPTQCVN#CSQFLR.G	>200	-0.07	5.521			ERBB2_HUMAN Receptor tyrosine-protein kinase erbB-2
P05026	ATP1B1	193	1000	R.VLGFKPKPPKN#ESLETYPVM*K.Y	18.5	-0.35	3.333			AT1B1_HUMAN Sodium/potassium-transporting ATPase subunit beta-1
P05026	ATP1B1	265	1000	K.YLQPLLAVQFTN#LTM*DTEIR.I	11	-1.81	1.941			AT1B1_HUMAN Sodium/potassium-transporting ATPase subunit beta-1
P05362	ICAM1	145	1000	R.AN#LTVVLLR.G	19.59	0.95	2.677	Ig-like C2-type 2	128-193	ICAM1_HUMAN Intercellular adhesion molecule 1
P05362	ICAM1	267	51.809	R.LNPTVTYGN#DSFSAK.A	40.9	0.06	1.948	Ig-like C2-type 3	230-297	ICAM1_HUMAN Intercellular adhesion molecule 1
P05556	ITGB1	212	38.776	K.LRNPCTSEQN#CTSPFSYK.N	24.46	0.32	4.176	VWFA	140-378	ITB1_HUMAN Integrin beta-1
P05556	ITGB1	406	73.311	K.NGVN#GTGENGR.K	13.95	-0.8	4.275			ITB1_HUMAN Integrin beta-1
P05556	ITGB1	481	1000	K.CHEGN#GTFECGACR.C	27.76	-0.66	5.059			ITB1_HUMAN Integrin beta-1
P05556	ITGB1	520	94.662	R.KEN#SSEICSNNGECVCGQCVCR.K	61.03	-0.74	4.457			ITB1_HUMAN Integrin beta-1
P06213	INSR	920	1000	R.GLSPGN#YSVR.I	23.14	-0.02	3.314	Fibronectin type-III 3	853-947	INSR_HUMAN Insulin receptor
P06280	GLA	215	1000	R.SIVYSCEWPLYM*WPFQKPN#YTEIR.Q	>200	-0.56	2.229			AGAL_HUMAN Alpha-galactosidase A
P06731	CEACAM5	152	13.38	R.VYPELPKPSISSN#NSKPVEDK.D	12.7	-0.84	3.657	Ig-like 1	35-144	CEAM5_HUMAN Carcinoembryonic antigen-related cell adhesion molecule 5
P06731	CEACAM5	204	1000	R.TLTLFN#VTR.N	17.72	0.15	2.587	Ig-like 2	146-237	CEAM5_HUMAN Carcinoembryonic antigen-related cell adhesion molecule 5
P06731	CEACAM5	246	75.739	R.RSDSVILNVLYGPDAPTISPLN#TSYR.S	109	6.66	5.042	Ig-like 3	238-322	CEAM5_HUMAN Carcinoembryonic antigen-related cell adhesion molecule 5
P06731	CEACAM5	375	48.874	R.LQLSNDN#R.T	>200	-0.45	3.451	Ig-like 4	325-415	CEAM5_HUMAN Carcinoembryonic antigen-related cell adhesion molecule 5
P06731	CEACAM5	508	14.966	K.TITVSAELPKPSISSN#NSKPVEDK.D	20.44	-0.21	4.228	Ig-like 6	502-593	CEAM5_HUMAN Carcinoembryonic antigen-related cell adhesion molecule 5
P06731	CEACAM5	665	24.437	R.N#NSIVK.S	22.65	-0.65	2.48	Ig-like 7	594-677	CEAM5_HUMAN Carcinoembryonic antigen-related cell adhesion molecule 5
P06756	ITGAV	74	1000	K.AN#TTQPGIVEGGQVLK.C	12.22	-0.04	2.722			ITAV_HUMAN Integrin alpha-V
P06756	ITGAV	554	1000	K.N#MTISR.G	10.62	-0.26	1.986			ITAV_HUMAN Integrin alpha-V
P06756	ITGAV	704	1000	R.LSCAFKTEN#QTR.Q	27.08	-0.53	2.844			ITAV_HUMAN Integrin alpha-V
P06756	ITGAV	874	1000	K.ISSLQTTEKN#DTVAGQGERDHLITK.R	14.2	-0.09	6.303			ITAV_HUMAN Integrin alpha-V
P08069	IGF1R	244	66.977	K.RACTENNECCHPECLGSCSAPDN#DTACVACR.H	>200	-0.34	7.519			IGF1R_HUMAN Insulin-like growth factor 1 receptor
P08069	IGF1R	900	53.534	R.LNPGN#YTAR.I	16.28	0.07	2.978	Fibronectin type-III 4	834-927	IGF1R_HUMAN Insulin-like growth factor 1 receptor
P08069	IGF1R	913	1000	R.IQATSLSGN#GSWTDPVFFYVQAK.T	18.62	5.67	2.218	Fibronectin type-III 4	834-927	IGF1R_HUMAN Insulin-like growth factor 1 receptor
P08174	CD55	95	1000	K.GSQWSDIEEFCN#R.S	>200	1.58	3.989	Sushi 1	35-96	DAF_HUMAN Complement decay-accelerating factor
P08195	SLC3A2	365	1000	K.DASSFLAEWQN#ITK.G	25.52	0.72	2.667			4F2_HUMAN 4F2 cell-surface antigen heavy chain
P08195	SLC3A2	381	128.035	K.GFSEDRLLIAGTN#SSDLQQILSLLESNK.D	23.37	-0.58	6.423			4F2_HUMAN 4F2 cell-surface antigen heavy chain
P08195	SLC3A2	424	44.278	K.SLVTQYLN#ATGNR.W	24.58	-0.16	3.58			4F2_HUMAN 4F2 cell-surface antigen heavy chain
P08473	MME	145	1000	R.SCIN#ESAIDSR.G	90.72	-0.49	2.121			NEP_HUMAN Neprilysin
P08473	MME	285	38.178	K.EIAN#ATAKPEDRNDPMLLYNK.M	45.48	1.5	3.705			NEP_HUMAN Neprilysin
P08648	ITGA5	593	1000	K.IYLRN#ESEFRDK.L	15.4	-0.19	4.523			ITA5_HUMAN Integrin alpha-5
P08648	ITGA5	773	24.437	K.NLN#NSQSDVVSFR.L	22.42	0.77	2.817			ITA5_HUMAN Integrin alpha-5
P08648	ITGA5	868	18.805	R.VTGLN#CTTNHPINPK.G	51.83	0.05	3.396			ITA5_HUMAN Integrin alpha-5
P09758	TACSTD2	120	70.908	K.ARQCN#QTSVCWCVNSVGVR.R	30.27	0.02	2.909	Thyroglublin type-1	70-145	TACD2_HUMAN Tumor-associated calcium signal transducer 2
P09758	TACSTD2	168	1000	R.HRPTAGAFN#HSDLDAELR.R	16.59	-0.07	2.56			TACD2_HUMAN Tumor-associated calcium signal transducer 2
P09758	TACSTD2	208	1000	K.FVAAVHYEQPTIQIELRQN#TSQK.A	5.9	0.09	2.805			TACD2_HUMAN Tumor-associated calcium signal transducer 2
P10586	PTPRF	966	40.362	R.DINSQQELQN#ITTDTR.F	5.55	-0.09	2.167	Fibronectin type-III 7	918-1010	PTPRF_HUMAN Receptor-type tyrosine-protein phosphatase F
P10909	CLU	291	1000	R.EIRHN#STGCLR.M	11.79	-0.85	2.716			CLUS_HUMAN Clusterin
P11047	LAMC1	1022	25.174	R.EGFVGNRCDQCEENYFYN#R.S	9.72	-1.05	2.972	Laminin EGF-like 11	983-1030	LAMC1_HUMAN Laminin subunit gamma-1
P11047	LAMC1	1107	24.437	R.VN#NTLSSQISR.L	5.85	-0.25	3.101			LAMC1_HUMAN Laminin subunit gamma-1
P11047	LAMC1	1395	29.667	R.KIPAIN#QTITEANEK.T	9.04	0.22	3.782			LAMC1_HUMAN Laminin subunit gamma-1
P11047	LAMC1	1439	1000	K.N#ATSTK.A	3.56	-0.41	2.348			LAMC1_HUMAN Laminin subunit gamma-1
P11166	SLC2A1	45	1000	K.VIEEFYN#QTWVHR.Y	14.86	-1.76	3.698			GTR1_HUMAN Solute carrier family 2, facilitated glucose transporter member 1
P11279	LAMP1	84	1000	R.SSCGKEN#TSDPSLVIAFGR.G	>200	-0.4	3.097			LAMP1_HUMAN Lysosome-associated membrane glycoprotein 1
P11279	LAMP1	103	1000	R.GHTLTLN#FTR.N	>200	0.16	4.093			LAMP1_HUMAN Lysosome-associated membrane glycoprotein 1
P11279	LAMP1	249	1000	R.KDN#TTVTR.L	34.41	-0.36	2.096			LAMP1_HUMAN Lysosome-associated membrane glycoprotein 1
P11279	LAMP1	307	1000	R.FFLQGIQLN#TILPDARDPAFK.A	20.16	-0.76	5.366			LAMP1_HUMAN Lysosome-associated membrane glycoprotein 1
P11717	IGF2R	2085	1000	K.GYPCGGN#K.T	13.4	-1.19	1.675			MPRI_HUMAN Cation-independent mannose-6-phosphate receptor
P12821	ACE	146	97.596	K.RQQYNALLSN#MSR.I	>200	-2.07	6.046			ACE_HUMAN Angiotensin-converting enzyme
P12821	ACE	695	30.612	K.NMQIAN#HTLK.Y	>200	-0.7	3.408			ACE_HUMAN Angiotensin-converting enzyme
P13473	LAMP2	49	1000	K.WQM*N#FTVR.Y	>200	-1.58	2.248			LAMP2_HUMAN Lysosome-associated membrane glycoprotein 2
P13473	LAMP2	58	1000	R.YETTN#K.T	>200	-0.54	2.116			LAMP2_HUMAN Lysosome-associated membrane glycoprotein 2
P13473	LAMP2	101	1000	K.IAVQFGPGFSWIAN#FTK.A	>200	-0.51	3.498			LAMP2_HUMAN Lysosome-associated membrane glycoprotein 2
P13473	LAMP2	275	1000	R.LN#SSTIK.Y	18.91	-0.85	2.754			LAMP2_HUMAN Lysosome-associated membrane glycoprotein 2
P13473	LAMP2	356	1000	R.VQPFN#VTQGK.Y	>200	-0.26	2.193			LAMP2_HUMAN Lysosome-associated membrane glycoprotein 2
P13987	CD59	43	1000	K.TAVN#CSSDFDACLITK.A	15.28	-0.22	1.708	UPAR/Ly6	26-108	CD59_HUMAN CD59 glycoprotein
P15260	IFNGR1	179	1000	R.MN#GSEIQYK.I	3.35	-0.79	2.076			INGR1_HUMAN Interferon gamma receptor 1
P16144	ITGB4	695	1000	R.CSFRDEDDDCTYSYTMEGDGAPGPN#STVLVHK.K	21.76	-1.87	4.917			ITB4_HUMAN Integrin beta-4
P16422	EPCAM	111	53.71	K.QCN#GTSMCWCVNTAGVR.R	12.51	-0.72	2.28	Thyroglublin type-1	63-135	EPCAM_HUMAN Epithelial cell adhesion molecule
P17181	IFNAR1	172	1000	K.N#SSGVEER.I	10	-1.82	2.678	Fibronectin type-III 2	127-227	INAR1_HUMAN Interferon alpha/beta receptor 1
P17301	ITGA2	343	1000	R.YFFN#VSDEAALLEK.A	18.43	7.46	3.52	VWFA	188-365	ITA2_HUMAN Integrin alpha-2
P17301	ITGA2	1074	1000	K.GEYFVN#VTTR.I	28.37	0.48	1.877			ITA2_HUMAN Integrin alpha-2
P19256	CD58	169	1000	R.N#STSIYFK.M	15.96	-0.33	3.268			LFA3_HUMAN Lymphocyte function-associated antigen 3
P20645	M6PR	57	1000	K.RLKPLFN#K.S	>200	-0.8	3.755			MPRD_HUMAN Cation-dependent mannose-6-phosphate receptor
P20645	M6PR	83	43.604	R.EAGN#HTSGAGLVQINK.S	57.97	-0.19	2.446			MPRD_HUMAN Cation-dependent mannose-6-phosphate receptor
P21589	NT5E	333	1000	K.LDN#YSTQELGK.T	21.86	-0.32	2.072			5NTD_HUMAN 5'-nucleotidase
P21860	ERBB3	437	48.874	K.NLN#VTSLGFR.S	7.27	-0.69	4.152			ERBB3_HUMAN Receptor tyrosine-protein kinase erbB-3
P21860	ERBB3	522	1000	K.VCDPLCSSGGCWGPGPGQCLSCRN#YSR.G	4.49	0.31	2.035			ERBB3_HUMAN Receptor tyrosine-protein kinase erbB-3
P21926	CD9	151	1000	K.AIHYALN#CCGLAGGVEQFISDICPK.K	61.73	-0.55	4.689			CD9_HUMAN CD9 antigen
P22223	CDH3	566	1000	R.QVLN#ITDK.D	3.02	3.485	3.474	Cadherin 5	547-650	CADH3_HUMAN Cadherin-3
P22413	ENPP1	285	1000	K.M*N#ASFSLK.S	20.08	-0.26	2.144			ENPP1_HUMAN Ectonucleotide pyrophosphatase/phosphodiesterase family member 1
P22413	ENPP1	341	1000	K.MYN#GSVPFEER.I	48.31	-0.07	2.779			ENPP1_HUMAN Ectonucleotide pyrophosphatase/phosphodiesterase family member 1
P22413	ENPP1	477	16.265	R.N#LSCREPNQHFKPYLK.H	17.59	-0.78	3.752			ENPP1_HUMAN Ectonucleotide pyrophosphatase/phosphodiesterase family member 1
P25445	FAS	118	1000	R.LCDEGHGLEVEIN#CTR.T	>200	-1.03	2.958			TNR6_HUMAN Tumor necrosis factor receptor superfamily member 6
P25445	FAS	136	20.625	R.CKPNFFCN#STVCEHCDPCTK.C	32.61	0.47	4.059			TNR6_HUMAN Tumor necrosis factor receptor superfamily member 6
P26006	ITGA3	107	1000	R.MN#ITVK.N	73.02	-0.75	2.163			ITA3_HUMAN Integrin alpha-3
P26006	ITGA3	265	1000	K.N#ITIVTGAPR.H	41.69	0.15	3.587			ITA3_HUMAN Integrin alpha-3
P26006	ITGA3	511	1000	R.RN#ITLAYTLEADRDR.R	84.31	-2.66	4.433			ITA3_HUMAN Integrin alpha-3
P26006	ITGA3	656	24.243	K.LLLSIN#VTNTR.T	17.09	-0.28	2.644			ITA3_HUMAN Integrin alpha-3
P26006	ITGA3	969	37.54	R.TSIPTINMEN#K.T	27.48	-0.07	2.925			ITA3_HUMAN Integrin alpha-3
P26012	ITGB8	466	50.805	R.N#CSCQCEDNRGPK.G	7.12	-0.37	2.167			ITB8_HUMAN Integrin beta-8
P29323	EPHB2	482	1000	K.ELSEYN#ATAIK.S	19.04	0.47	3.095	Fibronectin type-III 2	435-530	EPHB2_HUMAN Ephrin type-B receptor 2
P30464	HLA-B	110	1000	R.GYYN#QSEAGSHTLQR.M	7.42	-0.14	4.056			1B15_HUMAN HLA class I histocompatibility antigen, B-15 alpha chain
P30825	SLC7A1	226	142.629	K.NWQLTEEDFGN#TSGR.L	14.73	0.36	3.668			CTR1_HUMAN High affinity cationic amino acid transporter 1
P30825	SLC7A1	235	24.437	R.LCLNN#DTK.E	11.28	-0.39	3.039			CTR1_HUMAN High affinity cationic amino acid transporter 1
P30988	CALCR	91	1000	R.MQQLPAYQGEGPYCN#R.T	>200	0.15	2.381			CALCR_HUMAN Calcitonin receptor
P32004	L1CAM	294	20.167	R.VTYQNHN#K.T	12.31	-0.12	1.585	Ig-like C2-type 3	240-328	L1CAM_HUMAN Neural cell adhesion molecule L1
P32004	L1CAM	671	1000	K.VPGN#QTSTTLK.L	15.57	-0.35	2.732	Fibronectin type-III 1	615-712	L1CAM_HUMAN Neural cell adhesion molecule L1
P32004	L1CAM	849	1000	R.GYN#VTYWR.E	18.18	-0.82	3.305	Fibronectin type-III 3	814-916	L1CAM_HUMAN Neural cell adhesion molecule L1
P35052	GPC1	116	1000	R.SFDDHFQHLLN#DSER.T	32.71	0.3	4.996			GPC1_HUMAN Glypican-1
P35613	BSG	160	1000	K.ILLTCSLN#DSATEVTGHR.W	>200	-0.88	4.628	Ig-like C2-type	138-219	BASI_HUMAN Basigin
P35613	BSG	268	1000	K.ALM*N#GSESR.F	12.42	-0.32	2.171	Ig-like V-type	221-315	BASI_HUMAN Basigin
P35613	BSG	302	1000	R.CN#GTSSK.G	13.43	-0.34	2.442	Ig-like V-type	221-315	BASI_HUMAN Basigin
P40189	IL6ST	83	1000	K.EQYTIIN#R.T	21.83	-0.66	1.621	Ig-like C2-type	26-120	IL6RB_HUMAN Interleukin-6 receptor subunit beta
P40189	IL6ST	131	71.753	K.N#LSCIVNEGK.K	7.66	-0.65	2.297	Fibronectin type-III 1	125-216	IL6RB_HUMAN Interleukin-6 receptor subunit beta
P42892	ECE1	166	1000	K.HLLEN#STASVSEAERK.A	23.77	-0.62	4.354			ECE1_HUMAN Endothelin-converting enzyme 1
P42892	ECE1	187	1000	R.ACM*N#ETRIEELR.A	29.61	-0.34	1.951			ECE1_HUMAN Endothelin-converting enzyme 1
P42892	ECE1	210	1000	R.LGGWN#ITGPWAK.D	17.2	-1.71	2.138			ECE1_HUMAN Endothelin-converting enzyme 1
P42892	ECE1	270	1000	R.DYYLN#K.T	17.26	-0.96	1.801			ECE1_HUMAN Endothelin-converting enzyme 1
P42892	ECE1	539	1000	R.FFN#FSWR.V	12.62	3.609	3.602			ECE1_HUMAN Endothelin-converting enzyme 1
P42892	ECE1	632	1000	K.N#SSVEAFKR.Q	7.67	-0.5	2.522			ECE1_HUMAN Endothelin-converting enzyme 1
P42892	ECE1	651	40.362	K.RQTECMVEQYSN#YSVNGEPVNGR.H	107.97	-0.44	5.96			ECE1_HUMAN Endothelin-converting enzyme 1
P48960	CD97	371	1000	R.GDKN#VTMGQSSAR.M	9.91	0.1	3.164			CD97_HUMAN CD97 antigen
P50454	SERPINH1	120	1000	R.SLSN#STAR.N	17.86	-0.55	2.543			SERPH_HUMAN Serpin H1
P50895	BCAM	439	1000	R.TQN#FTLLVQGSPELK.T	6.66	-3.66	3.387	Ig-like C2-type 2	363-411	BCAM_HUMAN Basal cell adhesion molecule
P51795	CLCN5	408	33.657	K.LCDYENRFN#TSK.G	48	0.37	3.035			CLCN5_HUMAN H(+)/Cl(-) exchange transporter 5
P51805	PLXNA3	59	1000	K.LAPN#LTELR.A	>200	0.22	3.865	Sema	20-488	PLXA3_HUMAN Plexin-A3
P52569	SLC7A2	227	1000	K.N#ISASAR.E	5.5	-4.29	2.773			CTR2_HUMAN Low affinity cationic amino acid transporter 2
P52797	EFNA3	100	1000	R.TCN#ASQGFKR.W	10.82	-0.83	2.494	Ephrin RBD	30-169	EFNA3_HUMAN Ephrin-A3
P53801	PTTG1IP	54	78.156	K.N#VSCLWCNTNK.A	16.31	-0.16	2.895	PSI	39-92	PTTG_HUMAN Pituitary tumor-transforming gene 1 protein-interacting protein
P54709	ATP1B3	124	1000	K.FLKPYTLEEQKN#LTVCPDGALFEQK.G	107.61	-8.85	4.664			AT1B3_HUMAN Sodium/potassium-transporting ATPase subunit beta-3
P55268	LAMB2	1249	1000	R.N#TSAASTAQLVEATEELRR.E	17.19	1.35	5.342			LAMB2_HUMAN Laminin subunit beta-2
P55268	LAMB2	1348	119.274	R.RAN#TSALAVPSPVSNSASAR.H	>200	-0.3	4.117			LAMB2_HUMAN Laminin subunit beta-2
P56749	CLDN12	47	1000	K.N#LTVYTGLWVK.C	13.72	4.88	3.425			CLD12_HUMAN Claudin-12
P78504	JAG1	217	20.167	R.DDFFGHYACDQNGN#K.T	5.59	-0.69	2.927	DSL	185-229	JAG1_HUMAN Protein jagged-1
P78536	ADAM17	452	1000	K.MFSN#CSK.Q	19.94	-0.36	2.353	Peptidase M12B	223-474	ADA17_HUMAN Disintegrin and metalloproteinase domain-containing protein 17
P78536	ADAM17	539	1000	K.KCQEAIN#ATCK.G	>200	-0.9	3.356	Disintegrin	475-563	ADA17_HUMAN Disintegrin and metalloproteinase domain-containing protein 17
P78552	IL13RA1	157	13.378	R.NTSPDTN#YTLYYWHR.S	62.41	-1.57	1.901	Fibronectin type-III 2	128-226	I13R1_HUMAN Interleukin-13 receptor subunit alpha-1
P98160	HSPG2	89	1000	R.ALVN#FTR.S	>200	-0.18	2.385	SEA	80-191	PGBM_HUMAN Basement membrane-specific heparan sulfate proteoglycan core protein
Q02487	DSC2	392	1000	R.AN#YTILK.G	13.78	-0.8	2.656	Cadherin 3	356-471	DSC2_HUMAN Desmocollin-2
Q02487	DSC2	629	1000	K.AIN#DTAAR.L	23.57	-0.97	2.678	Cadherin 5	580-694	DSC2_HUMAN Desmocollin-2
Q03405	PLAUR	194	1000	K.CCN#TTK.C	17.75	-0.62	2.034	UPAR/Ly6 2	115-213	UPAR_HUMAN Urokinase plasminogen activator surface receptor
Q07954	LRP1	2521	1000	R.AVN#SSCR.A	24.33	-0.28	2.303			LRP1_HUMAN Prolow-density lipoprotein receptor-related protein 1
Q07954	LRP1	4364	1000	K.QSGDVTCN#CTDGR.V	7.49	-1.27	3.954	EGF-like 21	4340-4375	LRP1_HUMAN Prolow-density lipoprotein receptor-related protein 1
Q08174	PCDH1	305	26.889	K.AN#DSDQGANAEIEYTFHQAPEVVRR.L	30.3	0.88	2.389	Cadherin 3	281-387	PCDH1_HUMAN Protocadherin-1
Q08334	IL10RB	49	1000	K.GN#LTFTAQYLSYR.I	6.38	0.15	3.536	Fibronectin type-III 1	23-111	I10R2_HUMAN Interleukin-10 receptor subunit beta
Q08334	IL10RB	161	1000	K.N#GTDEK.F	4.97	-0.69	1.967	Fibronectin type-III 2	114-216	I10R2_HUMAN Interleukin-10 receptor subunit beta
Q08722	CD47	73	1000	K.GRDIYTFDGALN#K.S	16.06	0.1	5.377	Ig-like V-type	19-127	CD47_HUMAN Leukocyte surface antigen CD47
Q08722	CD47	111	1000	K.MDKSDAVSHTGN#YTCEVTELTR.E	>200	-0.08	5.145	Ig-like V-type	19-127	CD47_HUMAN Leukocyte surface antigen CD47
Q12913	PTPRJ	525	1000	K.GPN#GTEGASR.T	17.63	0.11	3.683	Fibronectin type-III 5	457-541	PTPRJ_HUMAN Receptor-type tyrosine-protein phosphatase eta
Q13308	PTK7	283	1000	R.ATVFAN#GSLLLTQVRPR.N	27.53	-4.77	3.108	Ig-like C2-type 3	225-317	PTK7_HUMAN Inactive tyrosine-protein kinase 7
Q13308	PTK7	405	1000	R.RQDVN#ITVATVPSWLK.K	17.89	-0.63	4.174	Ig-like C2-type 4	309-407	PTK7_HUMAN Inactive tyrosine-protein kinase 7
Q13332	PTPRS	733	1000	R.KVEAEALN#ATAIR.V	15.91	-0.91	2.837	Fibronectin type-III 5	723-831	PTPRS_HUMAN Receptor-type tyrosine-protein phosphatase S
Q13433	SLC39A6	67	17.009	R.YGEN#NSLSVEGFRK.L	8.91	3.09	5.437			S39A6_HUMAN Zinc transporter ZIP6
Q13433	SLC39A6	241	1000	K.TN#ESVSEPR.K	6.76	-2.31	3.049			S39A6_HUMAN Zinc transporter ZIP6
Q13444	ADAM15	237	1000	K.YRDFQHLLN#R.T	40.29	0.02	4.288	Peptidase M12B	213-414	ADA15_HUMAN Disintegrin and metalloproteinase domain-containing protein 15
Q13641	TPBG	81	1000	R.N#LTEVPTDLPAYVR.N	11.41	-0.27	3.618	LRRNT	53-91	TPBG_HUMAN Trophoblast glycoprotein
Q13641	TPBG	256	132.25	R.N#LTHLESLHLEDNALK.V	12.47	0.19	5.172			TPBG_HUMAN Trophoblast glycoprotein
Q13641	TPBG	275	1000	K.VLHN#GTLAELQGLPHIR.V	22.78	-0.17	3.887			TPBG_HUMAN Trophoblast glycoprotein
Q13740	ALCAM	167	1000	K.KLGDCISEDSYPDGN#ITWYR.N	105.22	0.12	2.055	Ig-like V-type 2	125-234	CD166_HUMAN CD166 antigen
Q13740	ALCAM	265	1000	K.EGDN#ITLK.C	108.28	0.16	2.148	Ig-like C2-type 1	245-328	CD166_HUMAN CD166 antigen
Q13740	ALCAM	306	1000	R.RN#ATGDYK.C	10.04	0.05	1.607	Ig-like C2-type 1	245-328	CD166_HUMAN CD166 antigen
Q13740	ALCAM	361	1000	R.N#ATVVWM*K.D	29.18	2.11	1.867	Ig-like C2-type 2	333-409	CD166_HUMAN CD166 antigen
Q13740	ALCAM	480	94.95	K.IIISPEEN#VTLTCTAENQLER.T	77.68	-0.94	5.03	Ig-like C2-type 3	416-501	CD166_HUMAN CD166 antigen
Q13740-2	ALCAM	499	59.298	R.TVNSLN#VSANENR.E	20.86	-0.98	4.077	Ig-like C2-type 3	416-501	CD166_HUMAN Isoform 2 of CD166 antigen
Q13813	SPTAN1	1356	1000	R.FLSDFRDLM*SWIN#GIR.G	42.04	2.16	2.763			SPTN1_HUMAN Spectrin alpha chain, non-erythrocytic 1
Q14126	DSG2	112	1000	K.DTGELN#VTSILDREETPFFLLTGYALDAR.G	3.8	0.12	5.433	Cadherin 1	50-160	DSG2_HUMAN Desmoglein-2
Q14126	DSG2	182	84.609	K.IN#ATDADEPNTLNSK.I	9.7	-0.23	2.946	Cadherin 2	161-273	DSG2_HUMAN Desmoglein-2
Q14126	DSG2	462	1000	R.YVQN#GTYTVK.I	10.47	-0.3	3.929	Cadherin 4	389-503	DSG2_HUMAN Desmoglein-2
Q14542	SLC29A2	48	1000	R.LAGAGN#STAR.I	23.13	0.04	1.84			S29A2_HUMAN Equilibrative nucleoside transporter 2
Q14956	GPNMB	249	16.062	K.NDRN#SSDETFLK.D	>200	-0.85	2.389	PKD	240-327	GPNMB_HUMAN Transmembrane glycoprotein NMB
Q15043	SLC39A14	77	1000	R.GN#VTQHVQGHR.N	>200	-0.67	4.433			S39AE_HUMAN Zinc transporter ZIP14
Q15223	PVRL1	72	1000	K.STN#GSK.Q	15.41	-0.29	2.354	Ig-like V-type	31-141	PVRL1_HUMAN Poliovirus receptor-related protein 1
Q15223	PVRL1	202	30.835	R.NPN#GTVTVISR.Y	>200	-0.14	2.683	Ig-like C2-type 1	149-238	PVRL1_HUMAN Poliovirus receptor-related protein 1
Q15223	PVRL1	297	1000	K.GVEAQN#R.T	19.83	-0.98	3.512	Ig-like C2-type 2	247-334	PVRL1_HUMAN Poliovirus receptor-related protein 1
Q15262	PTPRK	416	1000	R.IAVDWESLGYN#ITR.C	11.04	2.66	4.812	Fibronectin type-III 2	392-488	PTPRK_HUMAN Receptor-type tyrosine-protein phosphatase kappa
Q15303	ERBB4	358	1000	K.FIN#CTK.I	6.71	-0.56	2.124			ERBB4_HUMAN Receptor tyrosine-protein kinase erbB-4
Q15303	ERBB4	576	1000	K.MEDGLLTCHGPGPDN#CTK.C	15.18	-0.09	3.518			ERBB4_HUMAN Receptor tyrosine-protein kinase erbB-4
Q15758	SLC1A5	212	1000	R.SYSTTYEERN#ITGTR.V	17.25	-0.59	3.626			AAAT_HUMAN Neutral amino acid transporter B(0)
Q15904	ATP6AP1	261	1000	K.QPVSPVIHPPVSYN#DTAPR.I	63.4	-1.36	3.81			VAS1_HUMAN V-type proton ATPase subunit S1
Q16563	SYPL1	71	27.121	K.GQTEIQVNCPPAVTEN#K.T	>200	-0.2	1.987	MARVEL	28-237	SYPL1_HUMAN Synaptophysin-like protein 1
Q29983	MICA	79	1000	R.AKPQGQWAEDVLGN#KTWDRETR.D	19.64	0	3.535			MICA_HUMAN MHC class I polypeptide-related sequence A
Q29983	MICA	125	1000	R.VCEIHEDN#STR.S	30.83	-2.09	3.028			MICA_HUMAN MHC class I polypeptide-related sequence A
Q29983	MICA	210	1000	R.TVPPMVN#VTR.S	>200	-0.53	2.894	Ig-like C1-type	207-296	MICA_HUMAN MHC class I polypeptide-related sequence A
Q29983	MICA	220	1000	R.SEASEGN#ITVTCR.A	14.89	-0.74	2.024	Ig-like C2-type	207-296	MICA_HUMAN MHC class I polypeptide-related sequence A
Q3MIR4	TMEM30B	241	13.378	R.RPVYELSPDPN#NTGFINQDFVVWM*R.T	51.64	-3.98	4.302			CC50B_HUMAN Cell cycle control protein 50B
Q3ZCQ3	FAM174B	53	1000	R.ESRPPPGPGPGN#TTR.F	19.35	-0.46	3.955			F174B_HUMAN Membrane protein FAM174B
Q4KMQ2	ANO6	493	30.835	K.NIN#GTDPIQK.Y	12.75	-0.42	2.634			ANO6_HUMAN Anoctamin-6
Q4KMQ2	ANO6	802	22.529	K.GNPYSDLGN#HTTCR.Y	>200	-0.34	1.875			ANO6_HUMAN Anoctamin-6
Q58DX5	NAALADL2	295	37.54	K.N#VTNQIALLK.L	14.82	-0.65	3.465			NADL2_HUMAN Inactive N-acetylated-alpha-linked acidic dipeptidase-like protein 2
Q58DX5	NAALADL2	556	48.874	K.NNFN#CTR.R	15.4	-5.46	2.439			NADL2_HUMAN Inactive N-acetylated-alpha-linked acidic dipeptidase-like protein 2
Q58EX2	SDK2	577	1000	R.VISAGGN#DSR.S	21.65	0.3	2.002	Ig-like C2-type 6	496-585	SDK2_HUMAN Protein sidekick-2
Q58EX2	SDK2	936	33.657	R.ISWEEYN#RTNTR.V	27.74	-0.31	3.067	Fibronectin type-III 4	897-991	SDK2_HUMAN Protein sidekick-2
Q5MY95	ENTPD8	135	1000	R.KN#SSQAR.D	58.53	-0.61	2.653			ENTP8_HUMAN Ectonucleoside triphosphate diphosphohydrolase 8
Q5VU97	CACHD1	329	24.437	R.STNN#NTK.F	16.12	-0.08	2.481	VWFA	228-443	CAHD1_HUMAN VWFA and cache domain-containing protein 1
Q5ZPR3	CD276	91	1000	K.QLVHSFAEGQDQGSAYAN#R.T	21.31	-1.14	1.834	Ig-like V-type 1	29-139	CD276_HUMAN CD276 antigen
Q5ZPR3	CD276	104	1000	R.TALFPDLLAQGN#ASLR.L	17.61	-1.85	3.1	Ig-like V-type 1	29-139	CD276_HUMAN CD276 antigen
Q5ZPR3	CD276	215	1000	R.VVLGAN#GTYSCLVR.N	41.31	1.72	3.252	Ig-like C2-type 1	145-238	CD276_HUMAN CD276 antigen
Q5ZPR3	CD276	309	1000	R.DQGSAYAN#R.T	10.27	0.39	3.33	Ig-like V-type 2	243-357	CD276_HUMAN CD276 antigen
Q658P3	STEAP3	344	1000	K.QVLAN#K.S	20.07	-0.33	2.686			STEA3_HUMAN Metalloreductase STEAP3
Q6EMK4	VASN	117	1000	R.LHEITN#ETFR.G	>200	0.17	2.882			VASN_HUMAN Vasorin
Q6H3X3	RAET1G	82	1000	K.KLN#VTTAWK.A	13.72	-0.17	5.874			RET1G_HUMAN Retinoic acid early transcript 1G protein
Q6P4Q7	CNNM4	85	15.007	R.LYGYSLGN#ISSNLISFTEVDDAETLHK.S	31.05	-0.9	4.354			CNNM4_HUMAN Metal transporter CNNM4
Q6P4Q7	CNNM4	127	1000	R.GN#TSGVLVVLTK.F	26.05	0.36	3.484			CNNM4_HUMAN Metal transporter CNNM4
Q6UXI9	NPNT	273	1000	K.GN#GTILK.G	9.83	0.32	1.725			NPNT_HUMAN Nephronectin
Q6YHK3	CD109	118	1000	R.TQDEILFSN#STR.L	9.83	-0.37	2.403			CD109_HUMAN CD109 antigen
Q6YHK3	CD109	419	1000	K.IN#YTVPQSGTFK.I	8.33	0.1	2.546			CD109_HUMAN CD109 antigen
Q6ZMP0	THSD4	709	1000	R.QVYAN#R.S	8.93	0.22	1.988	TSP type-1 2	676-737	THSD4_HUMAN Thrombospondin type-1 domain-containing protein 4
Q7Z5N4	SDK1	1767	1000	K.N#LTSHTK.Y	13.65	-2.1	2.025	Fibronectin type-III 11	1704-1800	SDK1_HUMAN Protein sidekick-1
Q86SQ4	GPR126	143	1000	K.GFN#ASYIR.V	11.89	-0.47	2.234	CUB	41-149	GP126_HUMAN G-protein coupled receptor 126
Q8IWA5	SLC44A2	417	84.609	K.TCNPETFPSSN#ESR.Q	104.44	-0.3	3.584			CTL2_HUMAN Choline transporter-like protein 2
Q8IWT6	LRRC8A	66	1000	K.DSCN#DSFR.G	15.53	-0.27	2.483			LRC8A_HUMAN Leucine-rich repeat-containing protein 8A
Q8IWU5	SULF2	132	1000	R.TFAVYLN#STGYR.T	8.54	1.09	2.375			SULF2_HUMAN Extracellular sulfatase Sulf-2
Q8IWU5	SULF2	171	1000	R.FYN#YTLCR.N	4.91	-0.35	3.039			SULF2_HUMAN Extracellular sulfatase Sulf-2
Q8N0Z9	VSIG10	347	1000	R.N#LTQPEVIIQPSSR.H	13.47	-0.21	3.176	Ig-like C2-type 4	311-404	VSI10_HUMAN V-set and immunoglobulin domain-containing protein 10
Q8N271	PROM2	725	1000	R.N#VSECFLAR.E	23.39	2.45	2.633			PROM2_HUMAN Prominin-2
Q8N6C5	IGSF1	607	1000	K.N#LTLWCR.S	152.98	0.38	2.943	Ig-like C2-type 6	589-677	IGSF1_HUMAN Immunoglobulin superfamily member 1
Q8N8Z6	DCBLD1	64	23.354	K.NYPGTYPN#HTVCEK.T	11.42	-0.13	2.997	CUB	41-150	DCBD1_HUMAN Discoidin, CUB and LCCL domain-containing protein 1
Q8NC42	RNF149	131	100.017	R.RN#ASAVVLYNEER.Y	>200	0.02	3.69	PA	67-175	RN149_HUMAN E3 ubiquitin-protein ligase RNF149
Q8NE01	CNNM3	73	1000	R.LFGPGFAN#SSWSWVAPEGAGCREEAASPAGEWR.A	8.72	-0.74	6.502			CNNM3_HUMAN Metal transporter CNNM3
Q8NFZ8	CADM4	67	1000	R.QTLFFN#GTR.A	23.78	-0.37	3.429	Ig-like V-type	21-119	CADM4_HUMAN Cell adhesion molecule 4
Q8TAB3	PCDH19	546	1000	K.DGGLPSLQSN#ATVR.V	9.3	0.23	1.735	Cadherin 5	454-563	PCD19_HUMAN Protocadherin-19
Q8WWI5	SLC44A1	180	1000	R.CAPVN#ISCYAK.F	>200	0.14	3.588			CTL1_HUMAN Choline transporter-like protein 1
Q8WWY8	LIPH	357	1000	K.AGN#TTESK.I	12.79	-0.65	2.717			LIPH_HUMAN Lipase member H
Q8WXI7	MUC16	12416	1000	R.KFN#TTER.V	60.27	-1.51	1.594	SEA 3	12368-12504	MUC16_HUMAN Mucin-16
Q92508	PIEZO1	2294	1000	R.ELYN#GTADITLR.F	30.51	0.09	3.505			PIEZ1_HUMAN Piezo-type mechanosensitive ion channel component 1
Q92508	PIEZO1	2331	1000	K.HMLALAPN#STAR.R	30.18	-0.14	2.714			PIEZ1_HUMAN Piezo-type mechanosensitive ion channel component 1
Q92542	NCSTN	387	1000	R.TSLELWM*HTDPVSQKN#ESVR.N	58.48	-0.58	5.186			NICA_HUMAN Nicastrin
Q92542	NCSTN	417	1000	R.RPN#QSQPLPPSSLQR.F	109.71	-0.7	4.982			NICA_HUMAN Nicastrin
Q92542	NCSTN	612	1000	K.DLYEYSWVQGPLHSN#ETDRLPR.C	22.01	1.09	5.311			NICA_HUMAN Nicastrin
Q92823	NRCAM	223	1000	R.FN#HTQTIQQK.Q	36.87	-0.58	2.626	Ig-like 2	141-235	NRCAM_HUMAN Neuronal cell adhesion molecule
Q92823	NRCAM	276	45.026	R.ERPPTFLTPEGN#ASNK.E	22.96	-1.44	4.832	Ig-like 3	267-356	NRCAM_HUMAN Neuronal cell adhesion molecule
Q92823	NRCAM	858	28.934	R.VNVVN#STLAEVHWDPVPLK.S	20.04	0.3	4.39	Fibronectin type-III 3	848-950	NRCAM_HUMAN Neuronal cell adhesion molecule
Q92854	SEMA4D	379	33.657	R.AAN#YTSSLNLPDK.T	8.24	-0.18	2.974	Sema	22-500	SEM4D_HUMAN Semaphorin-4D
Q96HA4	C1orf159	128	1000	R.SFAGPGAPFPMN#R.S	29.05	-0.4	4.732			CA159_HUMAN Uncharacterized protein C1orf159
Q96K49	TMEM87B	68	1000	K.TMFN#STDIK.L	>200	2.09	2.104			TM87B_HUMAN Transmembrane protein 87B
Q96NT5	SLC46A1	58	1000	R.FSADLGYN#GTR.Q	24.6	-0.66	4.023			PCFT_HUMAN Proton-coupled folate transporter
Q96QE2	SLC2A13	433	1000	R.ITFKPIAPSGQN#ATCTR.Y	>200	-0.01	2.091			MYCT_HUMAN Proton myo-inositol cotransporter
Q96RD7	PANX1	255	1000	K.SGILRN#DSTVPDQFQCK.L	13.86	-0.22	3.087			PANX1_HUMAN Pannexin-1
Q99523	SORT1	162	24.437	K.DITDLIN#NTFIR.T	7.51	-2.45	4.933			SORT_HUMAN Sortilin
Q99571	P2RX4	75	1000	K.GVAVTN#TSK.L	28.87	-0.48	2.328			P2RX4_HUMAN P2X purinoceptor 4
Q9BRN9	TM2D3	157	1000	R.QRYPAN#CTVR.D	>200	-3.5	3.531			TM2D3_HUMAN TM2 domain-containing protein 3
Q9BTN0	LRFN3	339	1000	R.LLGN#SSR.A	76.67	-0.61	1.936	Ig-like	295-382	LRFN3_HUMAN Leucine-rich repeat and fibronectin type-III domain-containing protein 3
Q9C0C4	SEMA4C	106	24.437	K.NN#QTECFNFIR.F	15.39	0.01	3.286	Sema	30-497	SEM4C_HUMAN Semaphorin-4C
Q9C0C4	SEMA4C	121	1000	R.FLQPYN#ASHLYVCGTYAFQPK.C	10.98	1.56	3.247	Sema	30-497	SEM4C_HUMAN Semaphorin-4C
Q9H0U3	MAGT1	71	1000	K.APPRN#YSVIVMFTALQLHR.Q	18.33	6.45	6.879	Thioredoxin	47-175	MAGT1_HUMAN Magnesium transporter protein 1
Q9H0X4	ITFG3	314	1000	K.SDPHWESMLN#ATTR.R	>200	-0.01	3.344			ITFG3_HUMAN Protein ITFG3
Q9H0X4	ITFG3	389	1000	R.YKPDTLAVAVEN#GTGTDR.Q	15.52	-0.16	5.754			ITFG3_HUMAN Protein ITFG3
Q9H2X9	SLC12A5	333	1000	K.LAWEGN#ETVTTR.L	71.29	-0.99	2.338			S12A5_HUMAN Solute carrier family 12 member 5
Q9H6X2	ANTXR1	184	1000	K.DFN#ETQLAR.I	17.81	-0.06	3.037	VWFA	44-215	ANTR1_HUMAN Anthrax toxin receptor 1
Q9H8M5	CNNM2	112	24.437	R.VYGQNINN#ETWSR.I	13.74	-0.45	3.844			CNNM2_HUMAN Metal transporter CNNM2
Q9HC56	PCDH9	450	1000	K.IVASDSGKPSLN#QTALVR.V	12.36	-0.37	4.332	Cadherin 4	365-469	PCDH9_HUMAN Protocadherin-9
Q9HC58	SLC24A3	86	31.596	K.N#CTEPALHEFPNDIFTNEDRR.Q	>200	-0.97	4.103			NCKX3_HUMAN Sodium/potassium/calcium exchanger 3
Q9HCN3	TMEM8A	535	1000	R.GWSCTDN#STAQTVAQQR.A	31.04	-0.38	1.917			TMM8A_HUMAN Transmembrane protein 8A
Q9HCU4	CELSR2	1076	71.067	R.GNELSLVLLN#ASTGELK.L	6.83	8.03	2.38	Cadherin 9	1028-1146	CELR2_HUMAN Cadherin EGF LAG seven-pass G-type receptor 2
Q9HCU4	CELSR2	1501	1000	R.FGSVLGN#YSCAAQGTQGGSKK.S	16.82	1.56	5.777	Laminin G-like 1	1367-1571	CELR2_HUMAN Cadherin EGF LAG seven-pass G-type receptor 2
Q9HCU4	CELSR2	1741	1000	R.LHGLHLSN#ITVGGIPGPAGGVAR.G	54.83	-1.13	5.644	Laminin G-like 2	1614-1971	CELR2_HUMAN Cadherin EGF LAG seven-pass G-type receptor 2
Q9HCU4	CELSR2	1900	1000	K.GFDPDCN#K.T	5.13	-0.6	2.562	EGF-like 7	1883-1922	CELR2_HUMAN Cadherin EGF LAG seven-pass G-type receptor 2
Q9HCU4	CELSR2	2043	1000	R.N#ESGLDSGR.S	9.09	-0.17	3.331			CELR2_HUMAN Cadherin EGF LAG seven-pass G-type receptor 2
Q9HCU4	CELSR2	2061	1000	R.N#ATQHTAGYFGSDVK.V	9.12	-0.75	3.017			CELR2_HUMAN Cadherin EGF LAG seven-pass G-type receptor 2
Q9HDC9	APMAP	160	1000	R.AGPN#GTLFVADAYK.G	14.24	-0.01	2.477			APMAP_HUMAN Adipocyte plasma membrane-associated protein
Q9NPH3	IL1RAP	118	1000	R.N#TTYCSK.V	14.79	-0.85	2.045	Ig-like C2-type 1	21-128	IL1AP_HUMAN Interleukin-1 receptor accessory protein
Q9NV96	TMEM30A	107	1000	K.CLSPDVTPCFCTIN#FTLEK.S	13.11	-3.07	1.824			CC50A_HUMAN Cell cycle control protein 50A
Q9NYQ6	CELSR1	1576	1000	K.DIGN#YSCAAQGTQTGSKK.S	8.2	-0.22	1.503	Laminin G-like 1	1442-1646	CELR1_HUMAN Cadherin EGF LAG seven-pass G-type receptor 1
Q9NYQ6	CELSR1	2122	1000	K.LSRN#ETQVDGAR.A	20.32	-0.56	3.212			CELR1_HUMAN Cadherin EGF LAG seven-pass G-type receptor 1
Q9NZU0	FLRT3	226	24.243	K.VFFNLVN#LTELSLVR.N	105.95	-0.45	2.353			FLRT3_HUMAN Leucine-rich repeat transmembrane protein FLRT3
Q9P055	JKAMP	37	1000	K.N#GSTEIYGECGVCPR.G	7.65	1.28	2.133			JKAMP_HUMAN JNK1/MAPK8-associated membrane protein
Q9P2B2	PTGFRN	286	1000	K.N#VSVAEGK.E	8.65	-0.28	2.755	Ig-like C2-type 3	276-394	FPRP_HUMAN Prostaglandin F2 receptor negative regulator
Q9P2B2	PTGFRN	300	1000	K.ELDLTCN#ITTDRADDVRPEVTWSFSR.M	9.41	0.13	4.718	Ig-like C2-type 3	276-394	FPRP_HUMAN Prostaglandin F2 receptor negative regulator
Q9P2B2	PTGFRN	600	1000	R.YSVLIMAEKPVGDLSSPN#ETK.Y	7.71	1.54	5.405	Ig-like C2-type 5	544-662	FPRP_HUMAN Prostaglandin F2 receptor negative regulator
Q9UGT4	SUSD2	162	1000	K.SELVN#ETR.W	165.19	-0.19	2.927			SUSD2_HUMAN Sushi domain-containing protein 2
Q9UHG3	PCYOX1	323	46.819	R.KMSN#ITFLNFDPPIEEFHQYYQHIVTTLVK.G	19.38	0.19	5.349			PCYOX_HUMAN Prenylcysteine oxidase 1
Q9UHN6	TMEM2	739	1000	K.TTN#SSAADPR.E	15.34	-0.37	3.214			TMEM2_HUMAN Transmembrane protein 2
Q9UHN6	TMEM2	1092	1000	R.QN#GSLSK.I	9.06	-0.63	1.506			TMEM2_HUMAN Transmembrane protein 2
Q9UIG8	SLCO3A1	153	1000	R.WGAEGRDVCAAN#GSGGDEGPDPDLICR.N	10.04	-0.55	1.654			SO3A1_HUMAN Solute carrier organic anion transporter family member 3A1
Q9UIW2	PLXNA1	1043	1000	K.YN#YTEDPTILR.I	7.12	0.67	2.542	IPT/TIG 2	961-104	PLXA1_HUMAN Plexin-A1
Q9ULF5	SLC39A10	339	58.699	K.DLNEDDHHHECLN#VTQLLK.Y	57.82	-0.36	3.815			S39AA_HUMAN Zinc transporter ZIP10
Q9UM47	NOTCH3	1179	1000	R.CLHN#GTCVDLVGGFR.C	7.18	-0.46	5.553	EGF-like 30	1160-1203	NOTC3_HUMAN Neurogenic locus notch homolog protein 3
Q9UN76	SLC6A14	155	1000	K.N#CSSWSDK.N	9.55	0.31	1.597			S6A14_HUMAN Sodium- and chloride-dependent neutral and basic amino acid transporter B(0+)
Q9UN76	SLC6A14	174	30.612	R.SPIVTHCN#VSTVNK.G	29.49	0.31	4.235			S6A14_HUMAN Sodium- and chloride-dependent neutral and basic amino acid transporter B(0+)
Q9UN76	SLC6A14	189	1000	K.GIQEIIQM*N#K.S	22.72	-0.2	2.559			S6A14_HUMAN Sodium- and chloride-dependent neutral and basic amino acid transporter B(0+)
Q9UP38	FZD1	231	1000	K.FPVHGAGELCVGQN#TSDK.G	34.56	-1.24	2.918			FZD1_HUMAN Frizzled-1
Q9Y4D7	PLXND1	155	1000	R.RGN#ISAVAVR.F	12.87	-0.33	3.066	Sema	47-546	PLXD1_HUMAN Plexin-D1
Q9Y4D7	PLXND1	500	30.835	K.INLN#ESMQVVSR.R	14.79	0.27	3.122	Sema	47-546	PLXD1_HUMAN Plexin-D1
Q9Y4D7	PLXND1	696	1000	K.AN#FTIYDCSR.T	159.05	-0.4	2.817			PLXD1_HUMAN Plexin-D1
Q9Y4L1	HYOU1	869	1000	K.N#ATLAEQAK.L	>200	-0.59	2.772			HYOU1_HUMAN Hypoxia up-regulated protein 1
Q9Y4L1	HYOU1	931	1000	R.AEPPLN#ASASDQGEK.V	>200	-0.43	1.757			HYOU1_HUMAN Hypoxia up-regulated protein 1
Q9Y5Y6	ST14	485	1000	R.CDGWADCTDHSDELN#CSCDAGHQFTCK.N	9.81	-1.74	3.432	LDL-receptor class A 1	452-487	ST14_HUMAN Suppressor of tumorigenicity 14 protein
Q9Y639	NPTN	197	73.311	K.N#ASNMEYR.I	17.79	-0.16	3.06	Ig-like 2	148-235	NPTN_HUMAN Neuroplastin
Q9Y639	NPTN	229	1000	K.AN#ATIEVK.A	18.39	-0.49	1.658	Ig-like 2	148-235	NPTN_HUMAN Neuroplastin
Q9Y653	GPR56	303	1000	K.N#SSQVLGEK.V	3.6	-0.49	2.211			GPR56_HUMAN G-protein coupled receptor 56
Q9Y6M7	SLC4A7	786	49.59	K.DN#ITAHNISWR.N	21.8	-0.25	3.861			S4A7_HUMAN Sodium bicarbonate cotransporter 3
Q9Y6M7	SLC4A7	796	1000	R.N#LTVSECK.K	19.3	-0.04	1.837			S4A7_HUMAN Sodium bicarbonate cotransporter 3
