# Supplementary material for: Quantitative investigation of human cell surface N-glycoprotein dynamics
Source: Royal Society of Chemistry journal article supplement (doi:10.1039/c6sc01814a), 2016-08-15
Supplement: c6sc01814a9.xlsx [file c6sc01814a9.xlsx]

## Sheet: Protein Half-Lives
Table S6 - The Half-Lives of 216 Quantified Cell-Surface N-Glycoproteins in Expt# 2
Uniprot ID	Gene Symbol	Half-Life (h)	Unique Glycopeptide Hits	Annotation
A8MWY0	KIAA1324L	150.64	1	K132L_HUMAN UPF0577 protein KIAA1324-like
O00592	PODXL	16.66	1	PODXL_HUMAN Podocalyxin
O14672	ADAM10	21.55	2	ADA10_HUMAN Disintegrin and metalloproteinase domain-containing protein 10
O14786	NRP1	5.52	2	NRP1_HUMAN Neuropilin-1
O15031	PLXNB2	11.72	9	PLXB2_HUMAN Plexin-B2
O15230	LAMA5	17.94	3	LAMA5_HUMAN Laminin subunit alpha-5
O15394	NCAM2	113.18	7	NCAM2_HUMAN Neural cell adhesion molecule 2
O15455	TLR3	>200	1	TLR3_HUMAN Toll-like receptor 3
O43157	PLXNB1	13.34	1	PLXB1_HUMAN Plexin-B1
O43688	PPAP2C	48.15	1	LPP2_HUMAN Lipid phosphate phosphohydrolase 2
O60487	MPZL2	12.45	1	MPZL2_HUMAN Myelin protein zero-like protein 2
O60637	TSPAN3	11.02	2	TSN3_HUMAN Tetraspanin-3
O60814	HIST1H2BK	>200	1	H2B1K_HUMAN Histone H2B type 1-K
O60896	RAMP3	17.05	1	RAMP3_HUMAN Receptor activity-modifying protein 3
O75054	IGSF3	16.49	6	IGSF3_HUMAN Immunoglobulin superfamily member 3
O75144	ICOSLG	108.18	2	ICOSL_HUMAN ICOS ligand
O75882	ATRN	49.95	3	ATRN_HUMAN Attractin
O75954	TSPAN9	23.66	2	TSN9_HUMAN Tetraspanin-9
O76082	SLC22A5	30.88	2	S22A5_HUMAN Solute carrier family 22 member 5
O95084	PRSS23	17	3	PRS23_HUMAN Serine protease 23
O95136	S1PR2	29.24	1	S1PR2_HUMAN Sphingosine 1-phosphate receptor 2
O95196	CSPG5	19.88	1	CSPG5_HUMAN Chondroitin sulfate proteoglycan 5
O95274	LYPD3	5.57	4	LYPD3_HUMAN Ly6/PLAUR domain-containing protein 3
O95297	MPZL1	5.92	1	MPZL1_HUMAN Myelin protein zero-like protein 1
O95857	TSPAN13	9.53	1	TSN13_HUMAN Tetraspanin-13
O95858	TSPAN15	7.97	2	TSN15_HUMAN Tetraspanin-15
P01892	HLA-A	18.24	1	1A02_HUMAN HLA class I histocompatibility antigen, A-2 alpha chain
P02786	TFRC	16.29	4	TFR1_HUMAN Transferrin receptor protein 1
P04156	PRNP	13.87	2	PRIO_HUMAN Major prion protein
P04406	GAPDH	>200	2	G3P_HUMAN Glyceraldehyde-3-phosphate dehydrogenase
P04626	ERBB2	>200	1	ERBB2_HUMAN Receptor tyrosine-protein kinase erbB-2
P05026	ATP1B1	21.55	5	AT1B1_HUMAN Sodium/potassium-transporting ATPase subunit beta-1
P05362	ICAM1	22.4	3	ICAM1_HUMAN Intercellular adhesion molecule 1
P05556	ITGB1	27.76	11	ITB1_HUMAN Integrin beta-1
P06213	INSR	23.14	1	INSR_HUMAN Insulin receptor
P06280	GLA	>200	1	AGAL_HUMAN Alpha-galactosidase A
P06731	CEACAM5	18.14	8	CEAM5_HUMAN Carcinoembryonic antigen-related cell adhesion molecule 5
P06756	ITGAV	14.97	8	ITAV_HUMAN Integrin alpha-V
P08069	IGF1R	13.76	12	IGF1R_HUMAN Insulin-like growth factor 1 receptor
P08174	CD55	>200	2	DAF_HUMAN Complement decay-accelerating factor
P08195	SLC3A2	25.05	4	4F2_HUMAN 4F2 cell-surface antigen heavy chain
P08473	MME	68.1	2	NEP_HUMAN Neprilysin
P08648	ITGA5	19.79	4	ITA5_HUMAN Integrin alpha-5
P08962	CD63	25.73	1	CD63_HUMAN CD63 antigen
P09758	TACSTD2	21.29	7	TACD2_HUMAN Tumor-associated calcium signal transducer 2
P10586	PTPRF	5.55	1	PTPRF_HUMAN Receptor-type tyrosine-protein phosphatase F
P10909	CLU	11.79	1	CLUS_HUMAN Clusterin
P11047	LAMC1	7.44	4	LAMC1_HUMAN Laminin subunit gamma-1
P11166	SLC2A1	14.86	1	GTR1_HUMAN Solute carrier family 2, facilitated glucose transporter member 1
P11279	LAMP1	110.17	5	LAMP1_HUMAN Lysosome-associated membrane glycoprotein 1
P11717	IGF2R	13.4	2	MPRI_HUMAN Cation-independent mannose-6-phosphate receptor
P12821	ACE	>200	2	ACE_HUMAN Angiotensin-converting enzyme
P13473	LAMP2	>200	6	LAMP2_HUMAN Lysosome-associated membrane glycoprotein 2
P13987	CD59	15.28	1	CD59_HUMAN CD59 glycoprotein
P15260	IFNGR1	3.35	1	INGR1_HUMAN Interferon gamma receptor 1
P16144	ITGB4	21.76	1	ITB4_HUMAN Integrin beta-4
P16422	EPCAM	12.51	4	EPCAM_HUMAN Epithelial cell adhesion molecule
P17181	IFNAR1	10	2	INAR1_HUMAN Interferon alpha/beta receptor 1
P17301	ITGA2	18.19	4	ITA2_HUMAN Integrin alpha-2
P19256	CD58	15.96	2	LFA3_HUMAN Lymphocyte function-associated antigen 3
P19438	TNFRSF1A	8.23	1	TNR1A_HUMAN Tumor necrosis factor receptor superfamily member 1A
P20645	M6PR	128.98	2	MPRD_HUMAN Cation-dependent mannose-6-phosphate receptor
P21589	NT5E	21.86	2	5NTD_HUMAN 5'-nucleotidase
P21802	FGFR2	154.81	1	FGFR2_HUMAN Fibroblast growth factor receptor 2
P21860	ERBB3	5.07	3	ERBB3_HUMAN Receptor tyrosine-protein kinase erbB-3
P21926	CD9	61.73	1	CD9_HUMAN CD9 antigen
P22223	CDH3	3.02	1	CADH3_HUMAN Cadherin-3
P22413	ENPP1	20.08	5	ENPP1_HUMAN Ectonucleotide pyrophosphatase/phosphodiesterase family member 1
P23229	ITGA6	24.83	1	ITA6_HUMAN Integrin alpha-6
P25106	ACKR3	2.66	1	ACKR3_HUMAN Atypical chemokine receptor 3
P25445	FAS	33.06	2	TNR6_HUMAN Tumor necrosis factor receptor superfamily member 6
P26006	ITGA3	39.22	8	ITA3_HUMAN Integrin alpha-3
P26012	ITGB8	7.12	1	ITB8_HUMAN Integrin beta-8
P29323	EPHB2	19.04	1	EPHB2_HUMAN Ephrin type-B receptor 2
P30464	HLA-B	7.42	1	1B15_HUMAN HLA class I histocompatibility antigen, B-15 alpha chain
P30825	SLC7A1	13.01	2	CTR1_HUMAN High affinity cationic amino acid transporter 1
P30988	CALCR	>200	2	CALCR_HUMAN Calcitonin receptor
P32004	L1CAM	15.57	3	L1CAM_HUMAN Neural cell adhesion molecule L1
P35052	GPC1	32.71	1	GPC1_HUMAN Glypican-1
P35613	BSG	13.43	6	BASI_HUMAN Basigin
P40189	IL6ST	14.75	2	IL6RB_HUMAN Interleukin-6 receptor subunit beta
P42892	ECE1	21.88	12	ECE1_HUMAN Endothelin-converting enzyme 1
P48960	CD97	9.91	4	CD97_HUMAN CD97 antigen
P50454	SERPINH1	17.86	1	SERPH_HUMAN Serpin H1
P50895	BCAM	6.66	1	BCAM_HUMAN Basal cell adhesion molecule
P51795	CLCN5	48	1	CLCN5_HUMAN H(+)/Cl(-) exchange transporter 5
P51805	PLXNA3	>200	1	PLXA3_HUMAN Plexin-A3
P52569	SLC7A2	5.5	1	CTR2_HUMAN Low affinity cationic amino acid transporter 2
P52797	EFNA3	10.82	1	EFNA3_HUMAN Ephrin-A3
P53801	PTTG1IP	16.31	1	PTTG_HUMAN Pituitary tumor-transforming gene 1 protein-interacting protein
P54709	ATP1B3	57.59	4	AT1B3_HUMAN Sodium/potassium-transporting ATPase subunit beta-3
P55011	SLC12A2	18.14	1	S12A2_HUMAN Solute carrier family 12 member 2
P55268	LAMB2	17.31	2	LAMB2_HUMAN Laminin subunit beta-2
P56159	GFRA1	8.95	4	GFRA1_HUMAN GDNF family receptor alpha-1
P56749	CLDN12	13.72	1	CLD12_HUMAN Claudin-12
P78504	JAG1	5.59	1	JAG1_HUMAN Protein jagged-1
P78536	ADAM17	110.05	4	ADA17_HUMAN Disintegrin and metalloproteinase domain-containing protein 17
P78552	IL13RA1	62.41	1	I13R1_HUMAN Interleukin-13 receptor subunit alpha-1
P98160	HSPG2	>200	1	PGBM_HUMAN Basement membrane-specific heparan sulfate proteoglycan core protein
Q02487	DSC2	18.68	2	DSC2_HUMAN Desmocollin-2
Q03405	PLAUR	17.75	1	UPAR_HUMAN Urokinase plasminogen activator surface receptor
Q04721	NOTCH2	42.57	2	NOTC2_HUMAN Neurogenic locus notch homolog protein 2
Q07954	LRP1	15.91	3	LRP1_HUMAN Prolow-density lipoprotein receptor-related protein 1
Q08174	PCDH1	30.3	1	PCDH1_HUMAN Protocadherin-1
Q08334	IL10RB	5.67	2	I10R2_HUMAN Interleukin-10 receptor subunit beta
Q08722	CD47	73.5	5	CD47_HUMAN Leukocyte surface antigen CD47
Q12913	PTPRJ	108.82	5	PTPRJ_HUMAN Receptor-type tyrosine-protein phosphatase eta
Q13308	PTK7	17.89	3	PTK7_HUMAN Inactive tyrosine-protein kinase 7
Q13332	PTPRS	15.91	1	PTPRS_HUMAN Receptor-type tyrosine-protein phosphatase S
Q13433	SLC39A6	8.74	4	S39A6_HUMAN Zinc transporter ZIP6
Q13444	ADAM15	16.97	4	ADA15_HUMAN Disintegrin and metalloproteinase domain-containing protein 15
Q13641	TPBG	12.47	5	TPBG_HUMAN Trophoblast glycoprotein
Q13740	ALCAM	17.67	15	CD166_HUMAN CD166 antigen
Q13813	SPTAN1	42.04	1	SPTN1_HUMAN Spectrin alpha chain, non-erythrocytic 1
Q14118	DAG1	21.02	2	DAG1_HUMAN Dystroglycan
Q14126	DSG2	9.7	3	DSG2_HUMAN Desmoglein-2
Q14542	SLC29A2	23.13	1	S29A2_HUMAN Equilibrative nucleoside transporter 2
Q14956	GPNMB	>200	1	GPNMB_HUMAN Transmembrane glycoprotein NMB
Q15043	SLC39A14	>200	1	S39AE_HUMAN Zinc transporter ZIP14
Q15223	PVRL1	19.83	5	PVRL1_HUMAN Poliovirus receptor-related protein 1
Q15262	PTPRK	11.04	2	PTPRK_HUMAN Receptor-type tyrosine-protein phosphatase kappa
Q15303	ERBB4	10.95	2	ERBB4_HUMAN Receptor tyrosine-protein kinase erbB-4
Q15758	SLC1A5	17.25	2	AAAT_HUMAN Neutral amino acid transporter B(0)
Q15768	EFNB3	7.37	1	EFNB3_HUMAN Ephrin-B3
Q15904	ATP6AP1	63.4	1	VAS1_HUMAN V-type proton ATPase subunit S1
Q16563	SYPL1	>200	1	SYPL1_HUMAN Synaptophysin-like protein 1
Q29983	MICA	32.18	5	MICA_HUMAN MHC class I polypeptide-related sequence A
Q3MIR4	TMEM30B	35.57	4	CC50B_HUMAN Cell cycle control protein 50B
Q3ZCQ3	FAM174B	19.35	1	F174B_HUMAN Membrane protein FAM174B
Q4KMQ2	ANO6	106.38	2	ANO6_HUMAN Anoctamin-6
Q58DX5	NAALADL2	15.11	2	NADL2_HUMAN Inactive N-acetylated-alpha-linked acidic dipeptidase-like protein 2
Q58EX2	SDK2	24.69	2	SDK2_HUMAN Protein sidekick-2
Q5MY95	ENTPD8	58.53	1	ENTP8_HUMAN Ectonucleoside triphosphate diphosphohydrolase 8
Q5VU97	CACHD1	16.12	1	CAHD1_HUMAN VWFA and cache domain-containing protein 1
Q5VW38	GPR107	117.19	1	GP107_HUMAN Protein GPR107
Q5ZPR3	CD276	19.46	4	CD276_HUMAN CD276 antigen
Q658P3	STEAP3	20.07	1	STEA3_HUMAN Metalloreductase STEAP3
Q6EMK4	VASN	>200	1	VASN_HUMAN Vasorin
Q6H3X3	RAET1G	13.72	1	RET1G_HUMAN Retinoic acid early transcript 1G protein
Q6P4Q7	CNNM4	28.55	2	CNNM4_HUMAN Metal transporter CNNM4
Q6PCB8	EMB	13.76	2	EMB_HUMAN Embigin
Q6UXI9	NPNT	9.83	1	NPNT_HUMAN Nephronectin
Q6YHK3	CD109	9.08	2	CD109_HUMAN CD109 antigen
Q6ZMP0	THSD4	8.93	1	THSD4_HUMAN Thrombospondin type-1 domain-containing protein 4
Q6ZUK4	TMEM26	24.29	1	TMM26_HUMAN Transmembrane protein 26
Q7KYR7	BTN2A1	25.45	1	BT2A1_HUMAN Butyrophilin subfamily 2 member A1
Q7Z5N4	SDK1	13.65	2	SDK1_HUMAN Protein sidekick-1
Q86SQ4	GPR126	105.95	2	GP126_HUMAN G-protein coupled receptor 126
Q86UF1	TSPAN33	23.64	1	TSN33_HUMAN Tetraspanin-33
Q8IWA5	SLC44A2	45.6	4	CTL2_HUMAN Choline transporter-like protein 2
Q8IWT6	LRRC8A	15.53	1	LRC8A_HUMAN Leucine-rich repeat-containing protein 8A
Q8IWU5	SULF2	6.72	2	SULF2_HUMAN Extracellular sulfatase Sulf-2
Q8N0Z9	VSIG10	13.47	1	VSI10_HUMAN V-set and immunoglobulin domain-containing protein 10
Q8N271	PROM2	23.39	1	PROM2_HUMAN Prominin-2
Q8N6C5	IGSF1	152.98	1	IGSF1_HUMAN Immunoglobulin superfamily member 1
Q8N8Z6	DCBLD1	11.42	1	DCBD1_HUMAN Discoidin, CUB and LCCL domain-containing protein 1
Q8NBN3	TMEM87A	13.76	1	TM87A_HUMAN Transmembrane protein 87A
Q8NC42	RNF149	>200	1	RN149_HUMAN E3 ubiquitin-protein ligase RNF149
Q8NE01	CNNM3	8.72	1	CNNM3_HUMAN Metal transporter CNNM3
Q8NFZ8	CADM4	23.78	3	CADM4_HUMAN Cell adhesion molecule 4
Q8TAB3	PCDH19	9.3	1	PCD19_HUMAN Protocadherin-19
Q8TB96	ITFG1	14.85	1	TIP_HUMAN T-cell immunomodulatory protein
Q8TCJ2	STT3B	40	1	STT3B_HUMAN Dolichyl-diphosphooligosaccharide--protein glycosyltransferase subunit STT3B
Q8TCT8	SPPL2A	48.79	2	SPP2A_HUMAN Signal peptide peptidase-like 2A
Q8WTV0	SCARB1	10	1	SCRB1_HUMAN Scavenger receptor class B member 1
Q8WWI5	SLC44A1	>200	1	CTL1_HUMAN Choline transporter-like protein 1
Q8WWY8	LIPH	12.79	1	LIPH_HUMAN Lipase member H
Q8WXI7	MUC16	60.27	1	MUC16_HUMAN Mucin-16
Q92508	PIEZO1	30.34	4	PIEZ1_HUMAN Piezo-type mechanosensitive ion channel component 1
Q92542	NCSTN	104.02	5	NICA_HUMAN Nicastrin
Q92823	NRCAM	26.85	4	NRCAM_HUMAN Neuronal cell adhesion molecule
Q92854	SEMA4D	8.24	1	SEM4D_HUMAN Semaphorin-4D
Q96HA4	C1orf159	23.4	2	CA159_HUMAN Uncharacterized protein C1orf159
Q96K49	TMEM87B	>200	1	TM87B_HUMAN Transmembrane protein 87B
Q96NT5	SLC46A1	24.6	1	PCFT_HUMAN Proton-coupled folate transporter
Q96QE2	SLC2A13	>200	1	MYCT_HUMAN Proton myo-inositol cotransporter
Q96RD7	PANX1	125.85	1	PANX1_HUMAN Pannexin-1
Q99523	SORT1	7.51	1	SORT_HUMAN Sortilin
Q99571	P2RX4	28.87	1	P2RX4_HUMAN P2X purinoceptor 4
Q9BRN9	TM2D3	>200	1	TM2D3_HUMAN TM2 domain-containing protein 3
Q9BTN0	LRFN3	76.67	1	LRFN3_HUMAN Leucine-rich repeat and fibronectin type-III domain-containing protein 3
Q9BZC7	ABCA2	105.68	1	ABCA2_HUMAN ATP-binding cassette sub-family A member 2
Q9C0C4	SEMA4C	14.99	5	SEM4C_HUMAN Semaphorin-4C
Q9H0U3	MAGT1	18.33	1	MAGT1_HUMAN Magnesium transporter protein 1
Q9H0X4	ITFG3	15.52	3	ITFG3_HUMAN Protein ITFG3
Q9H2X9	SLC12A5	25.94	3	S12A5_HUMAN Solute carrier family 12 member 5
Q9H6X2	ANTXR1	17.81	1	ANTR1_HUMAN Anthrax toxin receptor 1
Q9H8M5	CNNM2	13.74	1	CNNM2_HUMAN Metal transporter CNNM2
Q9HC56	PCDH9	12.36	1	PCDH9_HUMAN Protocadherin-9
Q9HC58	SLC24A3	>200	1	NCKX3_HUMAN Sodium/potassium/calcium exchanger 3
Q9HCN3	TMEM8A	31.04	1	TMM8A_HUMAN Transmembrane protein 8A
Q9HCU4	CELSR2	9.12	11	CELR2_HUMAN Cadherin EGF LAG seven-pass G-type receptor 2
Q9HDC9	APMAP	14.24	1	APMAP_HUMAN Adipocyte plasma membrane-associated protein
Q9NPH3	IL1RAP	16.14	2	IL1AP_HUMAN Interleukin-1 receptor accessory protein
Q9NPR2	SEMA4B	20.12	1	SEM4B_HUMAN Semaphorin-4B
Q9NV96	TMEM30A	13.11	1	CC50A_HUMAN Cell cycle control protein 50A
Q9NYQ6	CELSR1	8.42	4	CELR1_HUMAN Cadherin EGF LAG seven-pass G-type receptor 1
Q9NZU0	FLRT3	105.95	1	FLRT3_HUMAN Leucine-rich repeat transmembrane protein FLRT3
Q9P055	JKAMP	7.65	1	JKAMP_HUMAN JNK1/MAPK8-associated membrane protein
Q9P2B2	PTGFRN	9.41	5	FPRP_HUMAN Prostaglandin F2 receptor negative regulator
Q9UGT4	SUSD2	38.1	3	SUSD2_HUMAN Sushi domain-containing protein 2
Q9UHG3	PCYOX1	21.61	4	PCYOX_HUMAN Prenylcysteine oxidase 1
Q9UHN6	TMEM2	15.44	4	TMEM2_HUMAN Transmembrane protein 2
Q9UHW9	SLC12A6	27.75	1	S12A6_HUMAN Solute carrier family 12 member 6
Q9UIG8	SLCO3A1	10.04	1	SO3A1_HUMAN Solute carrier organic anion transporter family member 3A1
Q9UIW2	PLXNA1	7.12	2	PLXA1_HUMAN Plexin-A1
Q9ULF5	SLC39A10	57.82	1	S39AA_HUMAN Zinc transporter ZIP10
Q9UM47	NOTCH3	7.18	1	NOTC3_HUMAN Neurogenic locus notch homolog protein 3
Q9UN76	SLC6A14	21.25	4	S6A14_HUMAN Sodium- and chloride-dependent neutral and basic amino acid transporter B(0+)
Q9Y4D7	PLXND1	14.79	3	PLXD1_HUMAN Plexin-D1
Q9Y4L1	HYOU1	10.77	4	HYOU1_HUMAN Hypoxia up-regulated protein 1
Q9Y5L3	ENTPD2	8.99	3	ENTP2_HUMAN Ectonucleoside triphosphate diphosphohydrolase 2
Q9Y5Y6	ST14	9.81	1	ST14_HUMAN Suppressor of tumorigenicity 14 protein
Q9Y639	NPTN	30.75	13	NPTN_HUMAN Neuroplastin
Q9Y653	GPR56	3.6	1	GPR56_HUMAN G-protein coupled receptor 56
Q9Y6M7	SLC4A7	20.55	2	S4A7_HUMAN Sodium bicarbonate cotransporter 3
