# Supplementary material for: Quantitative investigation of human cell surface N-glycoprotein dynamics
Source: Royal Society of Chemistry journal article supplement (doi:10.1039/c6sc01814a), 2016-08-15
Supplement: c6sc01814a10.xlsx [file c6sc01814a10.xlsx]

## Sheet: Sheet1
Table S7 - Unique N-Glycosylation Sites (545 Sites) Identified on 265 Surface Glycoproteins
Uniprot ID	Gene Symbol	Site	ModScore	ModScore Peptide	PPM	XCorr	ID in Expt# 1 (Y/N)	ID in Expt# 2 (Y/N)	Annotation
A1A5B4	ANO9	641	1000	K.EGN#STVDCLK.G	4.87	3.32	Y	N	ANO9_HUMAN Anoctamin-9
A8MVW0	FAM171A2	66	1000	R.ASVDVFGN#R.T	10.03	2.054	Y	Y	F1712_HUMAN Protein FAM171A2
A8MWY0	KIAA1324L	560	1000	K.N#ATFTFTWAFQR.T	2.24	4.228	N	Y	K132L_HUMAN UPF0577 protein KIAA1324-like
F2Z333	C1orf233	109	1000	R.AFALN#CSWR.G	-0.48	3.091	Y	N	CA233_HUMAN Fibronectin type-III domain-containing transmembrane protein C1orf233
O00592	PODXL	360	11.015	K.QLVLN#LTGNTLCAGGASDEK.L	0.7	3.083	N	Y	PODXL_HUMAN Podocalyxin
O14494	PPAP2A	142	1000	K.IN#CSDGYIEYYICR.G	0.96	3.337	Y	Y	LPP1_HUMAN Lipid phosphate phosphohydrolase 1
O14497	ARID1A	1308	0.524	R.TEPGIGPEGNMSTGAPQPN#LMPSN#PDSGMYSPSR.Y	-2.32	1.129	Y	N	ARI1A_HUMAN AT-rich interactive domain-containing protein 1A
O14497	ARID1A	1313	0.497	R.TEPGIGPEGNMSTGAPQPN#LMPSN#PDSGMYSPSR.Y	-2.32	1.129	Y	N	ARI1A_HUMAN AT-rich interactive domain-containing protein 1A
O14672	ADAM10	439	1000	R.N#ISQVLEK.K	0.66	3.521	Y	Y	ADA10_HUMAN Disintegrin and metalloproteinase domain-containing protein 10
O14672	ADAM10	551	8.594	R.EGICNGFTALCPASDPKPN#FTDCNR.H	-0.66	1.858	Y	Y	ADA10_HUMAN Disintegrin and metalloproteinase domain-containing protein 10
O14786	NRP1	150	1000	K.RGPECSQN#YTTPSGVIK.S	6.78	3.178	Y	Y	NRP1_HUMAN Neuropilin-1
O14786	NRP1	522	24.437	K.IGYSNN#GSDWK.M	0.03	2.136	Y	Y	NRP1_HUMAN Neuropilin-1
O15031	PLXNB2	127	1000	R.ALSN#ISLR.L	-0.1	2.429	Y	Y	PLXB2_HUMAN Plexin-B2
O15031	PLXNB2	391	126.313	R.GGLN#LTAVTVAAEN#NHTVAFLGTSDGR.I	-0.89	7.781	Y	Y	PLXB2_HUMAN Plexin-B2
O15031	PLXNB2	401	6.591	R.GGLN#LTAVTVAAEN#NHTVAFLGTSDGR.I	0.87	8.055	Y	Y	PLXB2_HUMAN Plexin-B2
O15031	PLXNB2	402	17.009	R.GGLN#LTAVTVAAENN#HTVAFLGTSDGR.I	-5.97	8.166	Y	Y	PLXB2_HUMAN Plexin-B2
O15031	PLXNB2	528	1000	K.SCVAVTSAQPQN#MSR.R	9.26	3.729	Y	Y	PLXB2_HUMAN Plexin-B2
O15031	PLXNB2	733	1000	K.LSHDAN#ETLPLHLYVK.S	-0.76	5.708	Y	Y	PLXB2_HUMAN Plexin-B2
O15031	PLXNB2	844	1000	R.ISVAGRN#CSFQPER.Y	2.87	4.545	Y	Y	PLXB2_HUMAN Plexin-B2
O15031	PLXNB2	1049	1000	R.EAESLQPM*TVVGTDYVFHN#DTK.V	2.04	4.091	Y	Y	PLXB2_HUMAN Plexin-B2
O15230	LAMA5	2196	1000	R.GIN#ASSMAWAR.L	5.01	3.098	Y	Y	LAMA5_HUMAN Laminin subunit alpha-5
O15230	LAMA5	2423	1000	R.KQELSRDN#ATLQATLHAAR.D	0.97	3.856	Y	Y	LAMA5_HUMAN Laminin subunit alpha-5
O15230	LAMA5	3107	1000	K.RLN#TTGVSAGCTADLLVGR.A	2.33	3.989	Y	Y	LAMA5_HUMAN Laminin subunit alpha-5
O15393	TMPRSS2	213	22.492	K.LN#TSAGNVDIYKK.L	4.03	1.952	Y	N	TMPS2_HUMAN Transmembrane protease serine 2
O15394	NCAM2	219	1000	K.SFN#ATAERGEEM*TFSCR.A	-0.23	1.628	Y	Y	NCAM2_HUMAN Neural cell adhesion molecule 2
O15394	NCAM2	474	39.663	R.YN#CTATNHIGTR.F	-1.05	2.86	Y	Y	NCAM2_HUMAN Neural cell adhesion molecule 2
O15394	NCAM2	562	18.805	R.SHGVQTM*VVLNNLEPN#TTYEIR.V	4.97	5.084	Y	Y	NCAM2_HUMAN Neural cell adhesion molecule 2
O15455	TLR3	507	8.913	R.N#LTILDLSNNN#IAN#INDDMLEGLEK.L	-4.78	1.527	N	Y	TLR3_HUMAN Toll-like receptor 3
O15455	TLR3	517	6.591	R.N#LTILDLSNNN#IAN#INDDMLEGLEK.L	-4.78	1.527	N	Y	TLR3_HUMAN Toll-like receptor 3
O15455	TLR3	520	1.603	R.N#LTILDLSNNN#IAN#INDDMLEGLEK.L	-4.78	1.527	N	Y	TLR3_HUMAN Toll-like receptor 3
O43157	PLXNB1	1253	1000	K.YTLDPN#ITSAGPTK.S	1.88	1.243	Y	Y	PLXB1_HUMAN Plexin-B1
O43194	GPR39	192	1000	R.GLTCN#R.S	-0.26	1.934	Y	Y	GPR39_HUMAN G-protein coupled receptor 39
O43688	PPAP2C	139	1000	R.VN#CSVYVQLEK.V	1.16	2.566	N	Y	LPP2_HUMAN Lipid phosphate phosphohydrolase 2
O60487	MPZL2	39	1000	R.VLEAVN#GTDAR.L	4.46	4.084	Y	Y	MPZL2_HUMAN Myelin protein zero-like protein 2
O60603	TLR2	414	73.311	K.N#LTNIDISK.N	4.33	2.972	Y	N	TLR2_HUMAN Toll-like receptor 2
O60637	TSPAN3	127	37.54	K.TYN#GTNPDAASR.A	-0.81	2.461	Y	Y	TSN3_HUMAN Tetraspanin-3
O60637	TSPAN3	167	1000	K.N#QSVPLSCCR.E	-0.74	1.2	Y	Y	TSN3_HUMAN Tetraspanin-3
O60814	HIST1H2BK	64	20.167	K.AMGIMN#SFVNDIFER.I	-0.06	2.238	N	Y	H2B1K_HUMAN Histone H2B type 1-K
O60896	RAMP3	103	1000	R.QFFSN#CTVDR.V	-1.2	3.09	Y	Y	RAMP3_HUMAN Receptor activity-modifying protein 3
O75054	IGSF3	101	1000	R.VQGN#STLLHITDLQAR.D	4.03	3.094	Y	Y	IGSF3_HUMAN Immunoglobulin superfamily member 3
O75054	IGSF3	655	24.437	K.NYN#NTWTR.L	-0.53	2.341	Y	Y	IGSF3_HUMAN Immunoglobulin superfamily member 3
O75054	IGSF3	700	52.725	K.RTLTLVENKPIQLN#CSVK.S	-1.11	6.579	Y	Y	IGSF3_HUMAN Immunoglobulin superfamily member 3
O75054	IGSF3	825	1000	R.LSQAQGN#LSVLETR.Q	2.53	1.919	Y	Y	IGSF3_HUMAN Immunoglobulin superfamily member 3
O75054	IGSF3	842	1000	R.QVQLECVVLN#R.T	0.35	1.776	Y	Y	IGSF3_HUMAN Immunoglobulin superfamily member 3
O75054	IGSF3	961	1000	K.RAEDTAGQTALTVMRPDASLQVDTVVPN#ATVSEK.A	-0.11	2.19	Y	Y	IGSF3_HUMAN Immunoglobulin superfamily member 3
O75144	ICOSLG	70	22.492	K.TVVTYHIPQN#SSLENVDSR.Y	4.39	3.87	Y	Y	ICOSL_HUMAN ICOS ligand
O75144	ICOSLG	102	1000	R.LFN#VTPQDEQK.F	0.72	3.348	Y	Y	ICOSL_HUMAN ICOS ligand
O75882	ATRN	914	16.964	K.AATCINPLN#GSVCERPAN#HSAK.Q	3.14	4.021	Y	Y	ATRN_HUMAN Attractin
O75882	ATRN	923	29.973	K.AATCINPLN#GSVCERPAN#HSAK.Q	3.14	4.021	Y	Y	ATRN_HUMAN Attractin
O75882	ATRN	1073	1000	K.CIN#QSICEK.C	-1.3	2.039	Y	Y	ATRN_HUMAN Attractin
O75882	ATRN	1082	1000	K.CEN#LTTGK.H	-2.24	2.131	Y	Y	ATRN_HUMAN Attractin
O75954	TSPAN9	180	1000	R.N#ATTPLWR.T	-0.21	2.189	Y	Y	TSN9_HUMAN Tetraspanin-9
O75976	CPD	626	13.38	R.N#NSNNFDLNR.N	1.1	1.469	N	Y	CBPD_HUMAN Carboxypeptidase D
O76082	SLC22A5	57	1000	R.CRVPDAAN#LSSAWR.N	0.01	4.61	Y	Y	S22A5_HUMAN Solute carrier family 22 member 5
O76082	SLC22A5	91	1000	R.LATIAN#FSALGLEPGR.D	2.93	4.507	Y	Y	S22A5_HUMAN Solute carrier family 22 member 5
O94805	ACTL6B	159	1000	K.TAVLTAFAN#GR.S	-1.78	2.845	Y	N	ACL6B_HUMAN Actin-like protein 6B
O95084	PRSS23	207	1000	R.GAN#DSTSAMPEQMK.F	1.48	1.881	Y	Y	PRS23_HUMAN Serine protease 23
O95136	S1PR2	19	1000	K.VQEHYN#YTK.E	-2	3.323	Y	Y	S1PR2_HUMAN Sphingosine 1-phosphate receptor 2
O95185	UNC5C	236	1000	R.LSDTAN#YTCVAK.N	-1.47	1.215	N	Y	UNC5C_HUMAN Netrin receptor UNC5C
O95196	CSPG5	355	1000	R.DLASSEN#GTECR.S	-0.3	2.145	N	Y	CSPG5_HUMAN Chondroitin sulfate proteoglycan 5
O95274	LYPD3	118	1000	K.LN#LTSR.A	-0.37	2.029	Y	Y	LYPD3_HUMAN Ly6/PLAUR domain-containing protein 3
O95274	LYPD3	163	1000	R.EACQGTSPPVVSCYN#ASDHVYK.G	-0.18	3.164	Y	Y	LYPD3_HUMAN Ly6/PLAUR domain-containing protein 3
O95274	LYPD3	176	1000	K.GCFDGN#VTLTAAN#VTVSLPVR.G	3.24	3.909	Y	Y	LYPD3_HUMAN Ly6/PLAUR domain-containing protein 3
O95274	LYPD3	183	1000	K.GCFDGN#VTLTAAN#VTVSLPVR.G	3.24	3.909	Y	Y	LYPD3_HUMAN Ly6/PLAUR domain-containing protein 3
O95274	LYPD3	227	39.663	R.CNSDLRN#K.T	0.37	1.411	Y	Y	LYPD3_HUMAN Ly6/PLAUR domain-containing protein 3
O95297	MPZL1	50	1000	K.EIFVAN#GTQGK.L	-0.48	3.12	Y	Y	MPZL1_HUMAN Myelin protein zero-like protein 1
O95857	TSPAN13	137	17.009	R.SVNPN#DTCLASCVK.S	-0.1	3.365	Y	Y	TSN13_HUMAN Tetraspanin-13
O95858	TSPAN15	189	71.753	R.N#TTEVVNTMCGYK.T	0.99	3.541	Y	Y	TSN15_HUMAN Tetraspanin-15
P01892	HLA-A	110	1000	R.GYYN#QSEAGSHTVQR.M	-0.34	2.732	Y	Y	1A02_HUMAN HLA class I histocompatibility antigen, A-2 alpha chain
P02786	TFRC	251	1000	K.DFEDLYTPVN#GSIVIVR.A	1.29	5.817	Y	Y	TFR1_HUMAN Transferrin receptor protein 1
P02786	TFRC	722	9.34	K.QN#NGAFN#ETLFR.N	4.4	1.891	Y	Y	TFR1_HUMAN Transferrin receptor protein 1
P02786	TFRC	723	24.437	K.QNN#GAFN#ETLFR.N	0.38	3.538	Y	Y	TFR1_HUMAN Transferrin receptor protein 1
P02786	TFRC	727	84.609	R.KQNNGAFN#ETLFR.N	1.25	5.659	Y	Y	TFR1_HUMAN Transferrin receptor protein 1
P04156	PRNP	197	1000	K.QHTVTTTTKGEN#FTETDVK.M	6.35	2.63	Y	Y	PRIO_HUMAN Major prion protein
P04406	GAPDH	9	1000	K.VGVN#GFGR.I	0.87	2.754	Y	Y	G3P_HUMAN Glyceraldehyde-3-phosphate dehydrogenase
P04406	GAPDH	225	1000	K.VIPELN#GK.L	0.87	2.563	Y	Y	G3P_HUMAN Glyceraldehyde-3-phosphate dehydrogenase
P04626	ERBB2	530	1000	R.GHCWGPGPTQCVN#CSQFLR.G	-0.07	5.521	Y	Y	ERBB2_HUMAN Receptor tyrosine-protein kinase erbB-2
P04626	ERBB2	571	1000	R.HCLPCHPECQPQN#GSVTCFGPEADQCVACAHYKDPPFCVAR.C	0.97	2.19	Y	Y	ERBB2_HUMAN Receptor tyrosine-protein kinase erbB-2
P04626	ERBB2	629	1000	K.FPDEEGACQPCPIN#CTHSCVDLDDK.G	10.19	1.808	Y	Y	ERBB2_HUMAN Receptor tyrosine-protein kinase erbB-2
P05026	ATP1B1	158	71.949	R.FKLEWLGN#CSGLNDETYGYK.E	-0.12	6.447	Y	Y	AT1B1_HUMAN Sodium/potassium-transporting ATPase subunit beta-1
P05026	ATP1B1	193	1000	R.VLGFKPKPPKN#ESLETYPVM*K.Y	-0.19	4.809	Y	Y	AT1B1_HUMAN Sodium/potassium-transporting ATPase subunit beta-1
P05026	ATP1B1	265	1000	K.YLQPLLAVQFTN#LTM*DTEIR.I	-1.81	1.941	Y	Y	AT1B1_HUMAN Sodium/potassium-transporting ATPase subunit beta-1
P05120	SERPINB2	115	4.545	R.SLSSAIN#ASTGNYLLESVNKLFGEK.S	0.67	1.475	N	Y	PAI2_HUMAN Plasminogen activator inhibitor 2
P05362	ICAM1	145	1000	R.AN#LTVVLLR.G	0.95	2.677	Y	Y	ICAM1_HUMAN Intercellular adhesion molecule 1
P05362	ICAM1	267	78.156	R.LNPTVTYGN#DSFSAK.A	4.86	3.526	Y	Y	ICAM1_HUMAN Intercellular adhesion molecule 1
P05556	ITGB1	205	6.603	K.LRN#PCTSEQNCTSPFSYK.N	0.1	2.201	Y	Y	ITB1_HUMAN Integrin beta-1
P05556	ITGB1	212	67.169	K.LRNPCTSEQN#CTSPFSYK.N	0.64	5.07	Y	Y	ITB1_HUMAN Integrin beta-1
P05556	ITGB1	406	73.311	K.NGVN#GTGENGR.K	-0.07	4.846	Y	Y	ITB1_HUMAN Integrin beta-1
P05556	ITGB1	411	132.105	K.NGVN#GTGEN#GR.K	-0.26	3.854	Y	Y	ITB1_HUMAN Integrin beta-1
P05556	ITGB1	481	1000	K.CHEGN#GTFECGACR.C	-0.14	5.269	Y	Y	ITB1_HUMAN Integrin beta-1
P05556	ITGB1	520	107.317	R.KEN#SSEICSNNGECVCGQCVCR.K	8.68	4.45	Y	Y	ITB1_HUMAN Integrin beta-1
P05556	ITGB1	527	0	R.KEN#SSEICSN#NGECVCGQCVCR.K	1.01	1.079	Y	Y	ITB1_HUMAN Integrin beta-1
P05556	ITGB1	669	1000	K.KDTCTQECSYFN#ITK.V	3.25	5.362	Y	Y	ITB1_HUMAN Integrin beta-1
P06213	INSR	920	1000	R.GLSPGN#YSVR.I	7.37	3.279	Y	Y	INSR_HUMAN Insulin receptor
P06280	GLA	215	1000	R.SIVYSCEWPLYM*WPFQKPN#YTEIR.Q	-0.56	2.229	N	Y	AGAL_HUMAN Alpha-galactosidase A
P06731	CEACAM5	152	13.38	R.VYPELPKPSISSN#NSKPVEDK.D	8.01	3.354	Y	Y	CEAM5_HUMAN Carcinoembryonic antigen-related cell adhesion molecule 5
P06731	CEACAM5	195	1000	R.LQLSN#GN#R.T	-1.16	1.866	Y	Y	CEAM5_HUMAN Carcinoembryonic antigen-related cell adhesion molecule 5
P06731	CEACAM5	197	1000	R.LQLSN#GN#R.T	-1.16	1.866	Y	Y	CEAM5_HUMAN Carcinoembryonic antigen-related cell adhesion molecule 5
P06731	CEACAM5	204	1000	R.TLTLFN#VTR.N	0.89	3.814	Y	Y	CEAM5_HUMAN Carcinoembryonic antigen-related cell adhesion molecule 5
P06731	CEACAM5	246	75.739	R.RSDSVILNVLYGPDAPTISPLN#TSYR.S	6.66	5.042	Y	Y	CEAM5_HUMAN Carcinoembryonic antigen-related cell adhesion molecule 5
P06731	CEACAM5	375	48.874	R.LQLSNDN#R.T	-0.45	3.451	Y	Y	CEAM5_HUMAN Carcinoembryonic antigen-related cell adhesion molecule 5
P06731	CEACAM5	508	27.055	K.TITVSAELPKPSISSN#NSKPVEDK.D	7.27	7.008	Y	Y	CEAM5_HUMAN Carcinoembryonic antigen-related cell adhesion molecule 5
P06731	CEACAM5	580	9.296	R.AYVCGIQNSVSAN#R.S	10.96	2.528	Y	Y	CEAM5_HUMAN Carcinoembryonic antigen-related cell adhesion molecule 5
P06731	CEACAM5	650	7.71	K.ITPNNN#GTYACFVSNLATGRN#NSIVK.S	-0.78	6.429	Y	Y	CEAM5_HUMAN Carcinoembryonic antigen-related cell adhesion molecule 5
P06731	CEACAM5	659	3.494	K.ITPNNN#GTYACFVSN#LATGRNNSIVK.S	0.61	1.921	Y	Y	CEAM5_HUMAN Carcinoembryonic antigen-related cell adhesion molecule 5
P06731	CEACAM5	665	24.437	R.N#NSIVK.S	-0.65	2.48	Y	Y	CEAM5_HUMAN Carcinoembryonic antigen-related cell adhesion molecule 5
P06756	ITGAV	74	1000	K.AN#TTQPGIVEGGQVLK.C	0.39	2.69	Y	Y	ITAV_HUMAN Integrin alpha-V
P06756	ITGAV	554	1000	K.N#MTISR.G	-0.26	1.986	Y	Y	ITAV_HUMAN Integrin alpha-V
P06756	ITGAV	704	1000	K.TEN#QTR.Q	-0.18	1.754	Y	Y	ITAV_HUMAN Integrin alpha-V
P06756	ITGAV	874	1000	K.ISSLQTTEKN#DTVAGQGER.D	-0.31	3.126	Y	Y	ITAV_HUMAN Integrin alpha-V
P06756	ITGAV	945	11.015	K.ENQN#HSYSLK.S	-0.52	2.069	Y	Y	ITAV_HUMAN Integrin alpha-V
P07339	CTSD	263	1000	K.GSLSYLN#VTRK.A	-7.28	3.467	Y	N	CATD_HUMAN_contaminant Cathepsin D
P07602	PSAP	101	1000	K.TCDWLPKPN#MSASCK.E	-1.57	2.393	Y	N	SAP_HUMAN Prosaposin
P08069	IGF1R	244	66.977	K.RACTENNECCHPECLGSCSAPDN#DTACVACR.H	-0.34	7.519	Y	Y	IGF1R_HUMAN Insulin-like growth factor 1 receptor
P08069	IGF1R	314	1000	R.N#GSQSMYCIPCEGPCPK.V	2.13	1.251	Y	Y	IGF1R_HUMAN Insulin-like growth factor 1 receptor
P08069	IGF1R	607	1000	R.TN#ASVPSIPLDVLSASN#SSSQLIVK.W	2.11	1.624	Y	Y	IGF1R_HUMAN Insulin-like growth factor 1 receptor
P08069	IGF1R	622	1000	R.TN#ASVPSIPLDVLSASN#SSSQLIVK.W	2.11	1.624	Y	Y	IGF1R_HUMAN Insulin-like growth factor 1 receptor
P08069	IGF1R	638	57.711	K.WNPPSLPN#GN#LSYYIVR.W	-3.05	2.636	Y	Y	IGF1R_HUMAN Insulin-like growth factor 1 receptor
P08069	IGF1R	640	58.551	K.WNPPSLPN#GN#LSYYIVR.W	-3.05	2.636	Y	Y	IGF1R_HUMAN Insulin-like growth factor 1 receptor
P08069	IGF1R	747	1000	K.RRDVMQVAN#TTMSSR.S	1.92	1.709	Y	Y	IGF1R_HUMAN Insulin-like growth factor 1 receptor
P08069	IGF1R	756	1000	R.SRN#TTAADTYN#ITDPEELETEYPFFESR.V	-0.82	5.685	Y	Y	IGF1R_HUMAN Insulin-like growth factor 1 receptor
P08069	IGF1R	764	1000	R.SRN#TTAADTYN#ITDPEELETEYPFFESR.V	-0.82	5.685	Y	Y	IGF1R_HUMAN Insulin-like growth factor 1 receptor
P08069	IGF1R	900	53.534	R.LNPGN#YTAR.I	0.07	2.978	Y	Y	IGF1R_HUMAN Insulin-like growth factor 1 receptor
P08069	IGF1R	913	1000	R.IQATSLSGN#GSWTDPVFFYVQAK.T	5.67	2.218	Y	Y	IGF1R_HUMAN Insulin-like growth factor 1 receptor
P08174	CD55	95	1000	K.GSQWSDIEEFCN#RSCEVPTR.L	1.05	3.758	Y	Y	DAF_HUMAN Complement decay-accelerating factor
P08195	SLC3A2	365	1000	K.DASSFLAEWQN#ITK.G	-0.46	3.104	Y	Y	4F2_HUMAN 4F2 cell-surface antigen heavy chain
P08195	SLC3A2	381	128.035	K.GFSEDRLLIAGTN#SSDLQQILSLLESNK.D	-0.58	6.423	Y	Y	4F2_HUMAN 4F2 cell-surface antigen heavy chain
P08195	SLC3A2	424	44.278	K.SLVTQYLN#ATGNR.W	0.06	3.85	Y	Y	4F2_HUMAN 4F2 cell-surface antigen heavy chain
P08195	SLC3A2	428	2.185	K.SLVTQYLNATGN#R.W	2.12	1.959	Y	Y	4F2_HUMAN 4F2 cell-surface antigen heavy chain
P08473	MME	145	1000	R.SCIN#ESAIDSR.G	1.15	2.095	Y	Y	NEP_HUMAN Neprilysin
P08473	MME	285	38.178	K.EIAN#ATAKPEDRNDPMLLYNK.M	1.5	3.705	Y	Y	NEP_HUMAN Neprilysin
P08648	ITGA5	297	1000	K.GN#LTYGYVTILN#GSDIR.S	10.22	2.461	Y	Y	ITA5_HUMAN Integrin alpha-5
P08648	ITGA5	307	1000	K.GN#LTYGYVTILN#GSDIR.S	10.22	2.461	Y	Y	ITA5_HUMAN Integrin alpha-5
P08648	ITGA5	593	1000	K.IYLRN#ESEFRDK.L	1.74	3.964	Y	Y	ITA5_HUMAN Integrin alpha-5
P08648	ITGA5	773	24.437	K.NLN#NSQSDVVSFR.L	3.55	3.183	Y	Y	ITA5_HUMAN Integrin alpha-5
P08648	ITGA5	868	27.121	R.VTGLN#CTTNHPINPK.G	-7.51	3.319	Y	Y	ITA5_HUMAN Integrin alpha-5
P08962	CD63	130	9.34	K.NN#HTASILDR.M	-7.35	3.243	Y	Y	CD63_HUMAN CD63 antigen
P09603	CSF1	154	13.38	K.NVFN#ETK.N	5.52	1.23	Y	N	CSF1_HUMAN Macrophage colony-stimulating factor 1
P09758	TACSTD2	120	70.908	K.ARQCN#QTSVCWCVNSVGVR.R	0.02	2.909	Y	Y	TACD2_HUMAN Tumor-associated calcium signal transducer 2
P09758	TACSTD2	168	1000	R.HRPTAGAFN#HSDLDAELRR.L	-0.14	6.043	Y	Y	TACD2_HUMAN Tumor-associated calcium signal transducer 2
P09758	TACSTD2	208	1000	R.QN#TSQK.A	-0.46	2.491	Y	Y	TACD2_HUMAN Tumor-associated calcium signal transducer 2
P10586	PTPRF	966	64.398	R.DINSQQELQN#ITTDTR.F	3.21	3.248	Y	Y	PTPRF_HUMAN Receptor-type tyrosine-protein phosphatase F
P10909	CLU	86	1000	K.KKEDALN#ETRESETK.L	-0.98	1.687	Y	Y	CLUS_HUMAN Clusterin
P10909	CLU	291	1000	R.EIRHN#STGCLR.M	-0.41	2.335	Y	Y	CLUS_HUMAN Clusterin
P11047	LAMC1	1022	25.174	R.EGFVGNRCDQCEENYFYN#R.S	-1.05	2.972	Y	Y	LAMC1_HUMAN Laminin subunit gamma-1
P11047	LAMC1	1107	24.437	R.VN#NTLSSQISR.L	0.46	1.607	Y	Y	LAMC1_HUMAN Laminin subunit gamma-1
P11047	LAMC1	1380	44.278	R.RVNDN#K.T	-0.1	2.963	Y	Y	LAMC1_HUMAN Laminin subunit gamma-1
P11047	LAMC1	1395	29.667	R.KIPAIN#QTITEANEK.T	0.22	3.782	Y	Y	LAMC1_HUMAN Laminin subunit gamma-1
P11047	LAMC1	1439	1000	K.N#ATSTK.A	0.3	2.415	Y	Y	LAMC1_HUMAN Laminin subunit gamma-1
P11166	SLC2A1	45	1000	K.VIEEFYN#QTWVHR.Y	-0.01	5.351	Y	Y	GTR1_HUMAN Solute carrier family 2, facilitated glucose transporter member 1
P11279	LAMP1	62	1000	K.N#MTFDLPSDATVVLN#R.S	2.38	4.027	Y	Y	LAMP1_HUMAN Lysosome-associated membrane glycoprotein 1
P11279	LAMP1	76	1000	K.N#MTFDLPSDATVVLN#R.S	2.38	4.027	Y	Y	LAMP1_HUMAN Lysosome-associated membrane glycoprotein 1
P11279	LAMP1	84	1000	R.SSCGKEN#TSDPSLVIAFGR.G	5.33	2.631	Y	Y	LAMP1_HUMAN Lysosome-associated membrane glycoprotein 1
P11279	LAMP1	103	1000	R.GHTLTLN#FTR.N	0.16	4.093	Y	Y	LAMP1_HUMAN Lysosome-associated membrane glycoprotein 1
P11279	LAMP1	249	1000	R.KDN#TTVTR.L	-0.36	2.096	Y	Y	LAMP1_HUMAN Lysosome-associated membrane glycoprotein 1
P11279	LAMP1	307	1000	R.FFLQGIQLN#TILPDARDPAFK.A	-0.76	5.366	Y	Y	LAMP1_HUMAN Lysosome-associated membrane glycoprotein 1
P11362	FGFR1	317	1000	K.TAGVN#TTDK.E	-0.05	1.371	Y	Y	FGFR1_HUMAN Fibroblast growth factor receptor 1
P11717	IGF2R	400	1000	R.YHN#QTLR.Y	0.22	1.453	Y	Y	MPRI_HUMAN Cation-independent mannose-6-phosphate receptor
P11717	IGF2R	2085	1000	K.GYPCGGN#K.T	-1.19	1.675	Y	Y	MPRI_HUMAN Cation-independent mannose-6-phosphate receptor
P12821	ACE	146	97.596	K.RQQYNALLSN#MSR.I	-2.07	6.046	Y	Y	ACE_HUMAN Angiotensin-converting enzyme
P12821	ACE	695	39.663	K.NMQIAN#HTLK.Y	-7.84	2.8	Y	Y	ACE_HUMAN Angiotensin-converting enzyme
P13473	LAMP2	49	1000	K.WQMN#FTVR.Y	-0.56	2.248	Y	Y	LAMP2_HUMAN Lysosome-associated membrane glycoprotein 2
P13473	LAMP2	58	1000	R.YETTN#K.T	-0.54	2.116	Y	Y	LAMP2_HUMAN Lysosome-associated membrane glycoprotein 2
P13473	LAMP2	101	1000	K.IAVQFGPGFSWIAN#FTK.A	-0.51	3.498	Y	Y	LAMP2_HUMAN Lysosome-associated membrane glycoprotein 2
P13473	LAMP2	275	1000	R.LN#SSTIK.Y	-0.04	2.856	Y	Y	LAMP2_HUMAN Lysosome-associated membrane glycoprotein 2
P13473	LAMP2	356	1000	R.VQPFN#VTQGK.Y	-0.26	2.193	Y	Y	LAMP2_HUMAN Lysosome-associated membrane glycoprotein 2
P13987	CD59	43	1000	K.TAVN#CSSDFDACLITK.A	-0.21	1.708	N	Y	CD59_HUMAN CD59 glycoprotein
P15151	PVR	105	1000	R.LGAELRN#ASLR.M	2.42	2.456	Y	N	PVR_HUMAN Poliovirus receptor
P15260	IFNGR1	179	1000	R.MN#GSEIQYK.I	4.66	2.612	Y	Y	INGR1_HUMAN Interferon gamma receptor 1
P16070	CD44	57	1000	K.AFN#STLPTM*AQMEK.A	6.9	2.535	Y	Y	CD44_HUMAN CD44 antigen
P16144	ITGB4	695	1000	R.CSFRDEDDDCTYSYTMEGDGAPGPN#STVLVHK.K	7.35	3.042	Y	Y	ITB4_HUMAN Integrin beta-4
P16422	EPCAM	74	1000	K.AEMN#GSK.L	-0.01	2.116	Y	Y	EPCAM_HUMAN Epithelial cell adhesion molecule
P16422	EPCAM	111	53.71	K.QCN#GTSMCWCVNTAGVR.R	1.09	2.588	Y	Y	EPCAM_HUMAN Epithelial cell adhesion molecule
P16422	EPCAM	198	0.604	K.FITSILYENNVITIDLVQN#SSQK.T	-1.16	1.482	Y	Y	EPCAM_HUMAN Epithelial cell adhesion molecule
P17181	IFNAR1	81	1000	K.LSGCQN#ITSTK.C	-0.21	2.264	Y	Y	INAR1_HUMAN Interferon alpha/beta receptor 1
P17181	IFNAR1	172	1000	K.N#SSGVEER.I	0.01	2.412	Y	Y	INAR1_HUMAN Interferon alpha/beta receptor 1
P17301	ITGA2	105	65.263	K.LNLQTSTSIPN#VTEM*K.T	-2.28	2.647	Y	Y	ITA2_HUMAN Integrin alpha-2
P17301	ITGA2	343	1000	R.YFFN#VSDEAALLEK.A	-0.14	2.862	Y	Y	ITA2_HUMAN Integrin alpha-2
P17301	ITGA2	460	35.803	R.AN#YTGQIVLYSVN#ENGNITVIQAHR.G	-0.63	3.442	Y	Y	ITA2_HUMAN Integrin alpha-2
P17301	ITGA2	471	2.017	R.AN#YTGQIVLYSVN#ENGNITVIQAHR.G	-0.63	3.442	Y	Y	ITA2_HUMAN Integrin alpha-2
P17301	ITGA2	475	4.085	R.AN#YTGQIVLYSVNENGN#ITVIQAHR.G	0.28	3.464	Y	Y	ITA2_HUMAN Integrin alpha-2
P17301	ITGA2	1057	1000	R.TASCSN#VTCWLK.D	-1.54	2.497	Y	Y	ITA2_HUMAN Integrin alpha-2
P17301	ITGA2	1074	1000	K.GEYFVN#VTTR.I	0.48	1.877	Y	Y	ITA2_HUMAN Integrin alpha-2
P18084	ITGB5	586	4.085	K.CHAGYIGDNCN#CSTDISTCR.G	0.17	3.199	Y	Y	ITB5_HUMAN Integrin beta-5
P18564	ITGB6	463	1000	K.EVEVN#SSK.C	-0.61	1.351	Y	Y	ITB6_HUMAN Integrin beta-6
P19256	CD58	169	1000	K.RN#STSIYFK.M	2.25	2.882	Y	Y	LFA3_HUMAN Lymphocyte function-associated antigen 3
P19438	TNFRSF1A	54	6.591	K.YIHPQN#NSICCTK.C	-2.35	1.578	N	Y	TNR1A_HUMAN Tumor necrosis factor receptor superfamily member 1A
P20645	M6PR	57	1000	K.RLKPLFN#K.S	-0.8	3.755	Y	Y	MPRD_HUMAN Cation-dependent mannose-6-phosphate receptor
P20645	M6PR	83	106.4	R.EAGN#HTSGAGLVQINK.S	-8.67	4.574	Y	Y	MPRD_HUMAN Cation-dependent mannose-6-phosphate receptor
P21589	NT5E	53	1000	K.CVN#ASR.C	-0.69	1.815	Y	Y	5NTD_HUMAN 5'-nucleotidase
P21589	NT5E	333	1000	K.LDN#YSTQELGK.T	-0.32	2.072	Y	Y	5NTD_HUMAN 5'-nucleotidase
P21802	FGFR2	83	0	K.DGVHLGPNN#R.T	-0.45	1.937	N	Y	FGFR2_HUMAN Fibroblast growth factor receptor 2
P21860	ERBB3	437	48.874	K.NLN#VTSLGFR.S	-0.69	4.152	Y	Y	ERBB3_HUMAN Receptor tyrosine-protein kinase erbB-3
P21860	ERBB3	522	1000	K.VCDPLCSSGGCWGPGPGQCLSCRN#YSR.G	0.31	2.035	Y	Y	ERBB3_HUMAN Receptor tyrosine-protein kinase erbB-3
P21860	ERBB3	616	5.07	K.YPDVQNECRPCHEN#CTQGCK.G	-0.36	2.047	Y	Y	ERBB3_HUMAN Receptor tyrosine-protein kinase erbB-3
P21926	CD9	151	1000	K.AIHYALN#CCGLAGGVEQFISDICPK.K	-0.55	4.689	N	Y	CD9_HUMAN CD9 antigen
P22223	CDH3	566	1000	R.QVLN#ITDK.D	1.39	3.322	Y	Y	CADH3_HUMAN Cadherin-3
P22413	ENPP1	285	1000	K.MN#ASFSLK.S	-0.09	1.892	Y	Y	ENPP1_HUMAN Ectonucleotide pyrophosphatase/phosphodiesterase family member 1
P22413	ENPP1	341	1000	K.MYN#GSVPFEER.I	3.1	3.054	Y	Y	ENPP1_HUMAN Ectonucleotide pyrophosphatase/phosphodiesterase family member 1
P22413	ENPP1	477	16.265	R.N#LSCREPNQHFKPYLK.H	9.54	4.137	Y	Y	ENPP1_HUMAN Ectonucleotide pyrophosphatase/phosphodiesterase family member 1
P23229	ITGA6	770	12.092	K.QLSCVANQN#GSQADCELGNPFKR.N	0.2	4.682	Y	Y	ITA6_HUMAN Integrin alpha-6
P23229	ITGA6	966	47.045	R.KYQTLN#CSVNVNCVNIR.C	3.98	2.426	Y	Y	ITA6_HUMAN Integrin alpha-6
P25106	ACKR3	192	9.34	K.TVTSASNN#ETYCR.S	-1.28	2.117	Y	Y	ACKR3_HUMAN Atypical chemokine receptor 3
P25445	FAS	118	1000	R.LCDEGHGLEVEIN#CTR.T	-1.03	2.958	Y	Y	TNR6_HUMAN Tumor necrosis factor receptor superfamily member 6
P25445	FAS	136	36.701	R.CKPNFFCN#STVCEHCDPCTK.C	0.7	4.539	Y	Y	TNR6_HUMAN Tumor necrosis factor receptor superfamily member 6
P26006	ITGA3	107	1000	R.MN#ITVK.N	-0.75	2.163	Y	Y	ITA3_HUMAN Integrin alpha-3
P26006	ITGA3	265	1000	K.N#ITIVTGAPR.H	0.17	3.919	Y	Y	ITA3_HUMAN Integrin alpha-3
P26006	ITGA3	511	1000	R.N#ITLAYTLEADRDR.R	-0.43	2.712	Y	Y	ITA3_HUMAN Integrin alpha-3
P26006	ITGA3	656	24.243	K.LLLSIN#VTNTR.T	-0.28	2.644	Y	Y	ITA3_HUMAN Integrin alpha-3
P26006	ITGA3	969	37.54	R.TSIPTINMEN#K.T	-0.07	2.925	Y	Y	ITA3_HUMAN Integrin alpha-3
P26012	ITGB8	466	50.805	R.N#CSCQCEDNRGPK.G	-0.37	2.167	Y	Y	ITB8_HUMAN Integrin beta-8
P27701	CD82	198	1000	K.GFCEAPGN#R.T	-0.68	1.364	Y	Y	CD82_HUMAN CD82 antigen
P27824	CANX	156	2.185	K.LNKPFLFDTKPLIVQYEVNFQN#GIECGGAYVK.L	-0.39	3.89	Y	N	CALX_HUMAN Calnexin
P29323	EPHB2	482	1000	K.ELSEYN#ATAIK.S	0.47	3.095	Y	Y	EPHB2_HUMAN Ephrin type-B receptor 2
P30464	HLA-B	110	1000	R.GYYN#QSEAGSHTLQR.M	-0.14	4.056	Y	Y	1B15_HUMAN HLA class I histocompatibility antigen, B-15 alpha chain
P30825	SLC7A1	226	142.629	K.NWQLTEEDFGN#TSGR.L	0.36	3.668	Y	Y	CTR1_HUMAN High affinity cationic amino acid transporter 1
P30825	SLC7A1	235	24.437	R.LCLNN#DTK.E	9.7	2.979	Y	Y	CTR1_HUMAN High affinity cationic amino acid transporter 1
P30988	CALCR	91	1000	R.MQQLPAYQGEGPYCN#R.T	1.49	2.27	Y	Y	CALCR_HUMAN Calcitonin receptor
P32004	L1CAM	294	20.167	R.VTYQNHN#K.T	-0.12	1.585	Y	Y	L1CAM_HUMAN Neural cell adhesion molecule L1
P32004	L1CAM	671	1000	K.VPGN#QTSTTLK.L	2.8	2.333	Y	Y	L1CAM_HUMAN Neural cell adhesion molecule L1
P32004	L1CAM	849	1000	R.GYN#VTYWR.E	1.3	3.412	Y	Y	L1CAM_HUMAN Neural cell adhesion molecule L1
P35052	GPC1	116	1000	R.SFDDHFQHLLN#DSER.T	5.22	4.966	Y	Y	GPC1_HUMAN Glypican-1
P35613	BSG	160	1000	K.ILLTCSLN#DSATEVTGHR.W	-0.25	4.915	Y	Y	BASI_HUMAN Basigin
P35613	BSG	268	1000	K.ALMN#GSESR.F	0.01	3.127	Y	Y	BASI_HUMAN Basigin
P35613	BSG	302	1000	R.CN#GTSSK.G	-0.34	2.442	Y	Y	BASI_HUMAN Basigin
P36941	LTBR	177	1000	K.AGHFQN#TSSPSAR.C	-7.83	1.642	Y	N	TNR3_HUMAN Tumor necrosis factor receptor superfamily member 3
P40189	IL6ST	83	1000	K.EQYTIIN#R.T	-0.66	1.621	Y	Y	IL6RB_HUMAN Interleukin-6 receptor subunit beta
P40189	IL6ST	131	104.477	K.N#LSCIVNEGK.K	-3.76	2.57	Y	Y	IL6RB_HUMAN Interleukin-6 receptor subunit beta
P40189	IL6ST	379	1000	K.SHLQN#YTVN#ATK.L	4.99	2.858	Y	Y	IL6RB_HUMAN Interleukin-6 receptor subunit beta
P40189	IL6ST	383	1000	K.SHLQN#YTVN#ATK.L	4.99	2.858	Y	Y	IL6RB_HUMAN Interleukin-6 receptor subunit beta
P42892	ECE1	166	1000	K.HLLEN#STASVSEAERK.A	8.47	5.33	Y	Y	ECE1_HUMAN Endothelin-converting enzyme 1
P42892	ECE1	187	1000	R.ACM*N#ETRIEELR.A	-0.34	1.951	Y	Y	ECE1_HUMAN Endothelin-converting enzyme 1
P42892	ECE1	210	1000	R.LGGWN#ITGPWAK.D	0.91	3.264	Y	Y	ECE1_HUMAN Endothelin-converting enzyme 1
P42892	ECE1	249	17.009	K.NSN#SNVIQVDQSGLGLPSR.D	-2.84	3.125	Y	Y	ECE1_HUMAN Endothelin-converting enzyme 1
P42892	ECE1	270	1000	R.DYYLN#K.T	-0.96	1.801	Y	Y	ECE1_HUMAN Endothelin-converting enzyme 1
P42892	ECE1	539	1000	R.FFN#FSWR.V	0.42	3.672	Y	Y	ECE1_HUMAN Endothelin-converting enzyme 1
P42892	ECE1	632	1000	K.N#SSVEAFKR.Q	-0.5	2.522	Y	Y	ECE1_HUMAN Endothelin-converting enzyme 1
P42892	ECE1	651	40.362	K.RQTECMVEQYSN#YSVNGEPVNGR.H	-0.44	5.96	Y	Y	ECE1_HUMAN Endothelin-converting enzyme 1
P42892	ECE1	660	15.007	K.RQTECMVEQYSN#YSVNGEPVN#GR.H	-11.61	3.281	Y	Y	ECE1_HUMAN Endothelin-converting enzyme 1
P48509	CD151	159	5.085	K.RYHQPGHEAVTSAVDQLQQEFHCCGSN#NSQDWR.D	-0.48	3.721	Y	N	CD151_HUMAN CD151 antigen
P48509	CD151	160	6.591	K.RYHQPGHEAVTSAVDQLQQEFHCCGSNN#SQDWR.D	0.46	3.773	Y	N	CD151_HUMAN CD151 antigen
P48960	CD97	38	9.394	R.WCPQNSSCVN#ATACR.C	5.6	1.137	Y	Y	CD97_HUMAN CD97 antigen
P48960	CD97	108	38.371	K.TFKN#ESENTCQDVDECQQNPR.L	-8.25	4.643	Y	Y	CD97_HUMAN CD97 antigen
P48960	CD97	371	1000	R.GDKN#VTMGQSSAR.M	0.1	3.164	Y	Y	CD97_HUMAN CD97 antigen
P50454	SERPINH1	120	1000	R.SLSN#STAR.N	-0.55	2.543	Y	Y	SERPH_HUMAN Serpin H1
P50895	BCAM	439	1000	R.TQN#FTLLVQGSPELK.T	-1.17	2.882	Y	Y	BCAM_HUMAN Basal cell adhesion molecule
P51795	CLCN5	405	7.971	K.LCDYEN#RFNTSK.G	3.12	3.37	Y	Y	CLCN5_HUMAN H(+)/Cl(-) exchange transporter 5
P51795	CLCN5	408	33.657	K.LCDYENRFN#TSK.G	0.37	3.035	Y	Y	CLCN5_HUMAN H(+)/Cl(-) exchange transporter 5
P51805	PLXNA3	59	1000	K.LAPN#LTELR.A	2.96	4.017	Y	Y	PLXA3_HUMAN Plexin-A3
P52569	SLC7A2	227	1000	K.N#ISASAR.E	-4.29	2.773	Y	Y	CTR2_HUMAN Low affinity cationic amino acid transporter 2
P52797	EFNA3	100	1000	R.TCN#ASQGFKR.W	-0.83	2.494	Y	Y	EFNA3_HUMAN Ephrin-A3
P53801	PTTG1IP	54	78.156	K.N#VSCLWCNTNK.A	1.51	2.687	Y	Y	PTTG_HUMAN Pituitary tumor-transforming gene 1 protein-interacting protein
P54709	ATP1B3	124	1000	K.FLKPYTLEEQKN#LTVCPDGALFEQK.G	-3.07	5.567	Y	Y	AT1B3_HUMAN Sodium/potassium-transporting ATPase subunit beta-3
P54709	ATP1B3	240	7.71	K.KLHVGYLQPLVAVQVSFAPN#NTGK.E	0.29	4.979	Y	Y	AT1B3_HUMAN Sodium/potassium-transporting ATPase subunit beta-3
P55011	SLC12A2	553	24.437	R.DATGNVN#DTIVTELTN#CTSAACK.L	0.19	4.033	Y	Y	S12A2_HUMAN Solute carrier family 12 member 2
P55011	SLC12A2	562	51.572	R.DATGNVN#DTIVTELTN#CTSAACK.L	0.19	4.033	Y	Y	S12A2_HUMAN Solute carrier family 12 member 2
P55268	LAMB2	1249	1000	R.N#TSAASTAQLVEATEELRR.E	2.14	4.868	Y	Y	LAMB2_HUMAN Laminin subunit beta-2
P55268	LAMB2	1348	119.274	R.RAN#TSALAVPSPVSNSASAR.H	-0.3	4.117	Y	Y	LAMB2_HUMAN Laminin subunit beta-2
P55316	FOXG1	232	0.156	K.QGWQNSIRHN#LSLNK.C	-1.4	1.067	N	Y	FOXG1_HUMAN Forkhead box protein G1
P56159	GFRA1	59	1000	K.ETN#FSLASGLEAK.D	0.16	3.123	Y	Y	GFRA1_HUMAN GDNF family receptor alpha-1
P56159	GFRA1	152	24.437	K.GN#NCLDAAK.A	-1.05	2.992	Y	Y	GFRA1_HUMAN GDNF family receptor alpha-1
P56159	GFRA1	406	20.985	K.SN#VSGNTHLCISNGNYEK.E	2.84	5.143	Y	Y	GFRA1_HUMAN GDNF family receptor alpha-1
P56749	CLDN12	47	1000	K.N#LTVYTGLWVK.C	4.88	3.425	N	Y	CLD12_HUMAN Claudin-12
P78504	JAG1	217	20.167	R.DDFFGHYACDQNGN#K.T	-0.69	2.927	Y	Y	JAG1_HUMAN Protein jagged-1
P78536	ADAM17	103	1000	K.VVVVDGKN#ESEYTVK.W	-0.51	2.915	Y	Y	ADA17_HUMAN Disintegrin and metalloproteinase domain-containing protein 17
P78536	ADAM17	452	1000	K.MFSN#CSK.Q	8	2.096	Y	Y	ADA17_HUMAN Disintegrin and metalloproteinase domain-containing protein 17
P78536	ADAM17	539	1000	K.CQEAIN#ATCK.G	0.1	2.171	Y	Y	ADA17_HUMAN Disintegrin and metalloproteinase domain-containing protein 17
P78536	ADAM17	594	2.017	R.EQQLESCACN#ETDNSCK.V	1.79	1.123	Y	Y	ADA17_HUMAN Disintegrin and metalloproteinase domain-containing protein 17
P78536	ADAM17	598	2.017	R.EQQLESCACNETDN#SCK.V	-2.62	1.256	Y	Y	ADA17_HUMAN Disintegrin and metalloproteinase domain-containing protein 17
P78552	IL13RA1	157	13.378	R.NTSPDTN#YTLYYWHR.S	-1.57	1.901	N	Y	I13R1_HUMAN Interleukin-13 receptor subunit alpha-1
P98160	HSPG2	89	1000	R.ALVN#FTR.S	-0.18	2.385	Y	Y	PGBM_HUMAN Basement membrane-specific heparan sulfate proteoglycan core protein
Q02487	DSC2	392	1000	R.AN#YTILK.G	-0.8	2.656	Y	Y	DSC2_HUMAN Desmocollin-2
Q02487	DSC2	629	1000	K.AIN#DTAAR.L	-0.97	2.678	Y	Y	DSC2_HUMAN Desmocollin-2
Q03405	PLAUR	194	1000	K.CCN#TTK.C	-0.62	2.034	Y	Y	UPAR_HUMAN Urokinase plasminogen activator surface receptor
Q04721	NOTCH2	46	32.218	R.DGYEPCVNEGMCVTYHN#GTGYCK.C	3.06	4.005	Y	Y	NOTC2_HUMAN Neurogenic locus notch homolog protein 2
Q07954	LRP1	357	1000	R.CDMDGQN#R.T	-0.56	2.946	Y	Y	LRP1_HUMAN Prolow-density lipoprotein receptor-related protein 1
Q07954	LRP1	2521	1000	R.AVN#SSCR.A	-0.28	2.303	Y	Y	LRP1_HUMAN Prolow-density lipoprotein receptor-related protein 1
Q07954	LRP1	3333	1000	R.TCVSN#CTASQFVCK.N	-0.47	1.341	Y	Y	LRP1_HUMAN Prolow-density lipoprotein receptor-related protein 1
Q07954	LRP1	4364	1000	K.QSGDVTCN#CTDGR.V	-1.03	3.335	Y	Y	LRP1_HUMAN Prolow-density lipoprotein receptor-related protein 1
Q08174	PCDH1	305	26.889	K.AN#DSDQGANAEIEYTFHQAPEVVRR.L	0.88	2.389	N	Y	PCDH1_HUMAN Protocadherin-1
Q08334	IL10RB	49	1000	K.GN#LTFTAQYLSYR.I	0.15	3.536	Y	Y	I10R2_HUMAN Interleukin-10 receptor subunit beta
Q08334	IL10RB	161	1000	K.N#GTDEK.F	-0.3	1.656	Y	Y	I10R2_HUMAN Interleukin-10 receptor subunit beta
Q08722	CD47	73	1000	K.GRDIYTFDGALN#K.S	6.97	2.804	Y	Y	CD47_HUMAN Leukocyte surface antigen CD47
Q08722	CD47	111	1000	K.SDAVSHTGN#YTCEVTELTR.E	-0.18	3.098	Y	Y	CD47_HUMAN Leukocyte surface antigen CD47
Q12913	PTPRJ	231	6.591	K.AALSWSNGN#GTASCR.V	6.85	3.402	Y	Y	PTPRJ_HUMAN Receptor-type tyrosine-protein phosphatase eta
Q12913	PTPRJ	342	1000	R.YN#ATVYSQAAN#GTEGQPQAIEFR.T	0.69	2.472	Y	Y	PTPRJ_HUMAN Receptor-type tyrosine-protein phosphatase eta
Q12913	PTPRJ	351	1000	R.YN#ATVYSQAAN#GTEGQPQAIEFR.T	0.69	2.472	Y	Y	PTPRJ_HUMAN Receptor-type tyrosine-protein phosphatase eta
Q12913	PTPRJ	391	1000	K.VSDN#ESSSN#YTYK.I	0.84	1.217	Y	Y	PTPRJ_HUMAN Receptor-type tyrosine-protein phosphatase eta
Q12913	PTPRJ	396	1000	K.VSDN#ESSSN#YTYK.I	0.84	1.217	Y	Y	PTPRJ_HUMAN Receptor-type tyrosine-protein phosphatase eta
Q12913	PTPRJ	413	4.085	K.IHVAGETDSSNLN#VSEPR.A	-0.76	2.122	Y	Y	PTPRJ_HUMAN Receptor-type tyrosine-protein phosphatase eta
Q12913	PTPRJ	525	1000	K.GPN#GTEGASR.T	0.11	3.683	Y	Y	PTPRJ_HUMAN Receptor-type tyrosine-protein phosphatase eta
Q12999	TSPAN31	109	1000	K.QTDVIN#ASWWVM*SN#K.T	-0.02	1.472	N	Y	TSN31_HUMAN Tetraspanin-31
Q12999	TSPAN31	117	1000	K.QTDVIN#ASWWVM*SN#K.T	-0.02	1.472	N	Y	TSN31_HUMAN Tetraspanin-31
Q13308	PTK7	116	97.748	R.SAN#ASFNIK.W	-9.83	2.452	Y	Y	PTK7_HUMAN Inactive tyrosine-protein kinase 7
Q13308	PTK7	283	1000	R.ATVFAN#GSLLLTQVRPR.N	-4.77	3.108	Y	Y	PTK7_HUMAN Inactive tyrosine-protein kinase 7
Q13308	PTK7	405	1000	R.RQDVN#ITVATVPSWLK.K	-0.63	4.174	Y	Y	PTK7_HUMAN Inactive tyrosine-protein kinase 7
Q13308	PTK7	567	1000	R.VTRDDAGN#YTCIASN#GPQGQIR.A	-4.53	2.612	Y	Y	PTK7_HUMAN Inactive tyrosine-protein kinase 7
Q13308	PTK7	574	1000	R.VTRDDAGN#YTCIASN#GPQGQIR.A	-4.53	2.612	Y	Y	PTK7_HUMAN Inactive tyrosine-protein kinase 7
Q13332	PTPRS	733	1000	R.KVEAEALN#ATAIR.V	-0.91	2.837	Y	Y	PTPRS_HUMAN Receptor-type tyrosine-protein phosphatase S
Q13433	SLC39A6	67	17.009	R.YGEN#NSLSVEGFRK.L	3.09	5.437	Y	Y	S39A6_HUMAN Zinc transporter ZIP6
Q13433	SLC39A6	241	1000	R.KTN#ESVSEPRK.G	-1	3.348	Y	Y	S39A6_HUMAN Zinc transporter ZIP6
Q13433	SLC39A6	266	12.79	R.NTNENPQECFN#ASK.L	0.89	1.476	Y	Y	S39A6_HUMAN Zinc transporter ZIP6
Q13433	SLC39A6	283	2.017	K.LLTSHGM*GIQVPLN#ATEFNYLCPAIINQIDAR.S	0.35	4.372	Y	Y	S39A6_HUMAN Zinc transporter ZIP6
Q13443	ADAM9	381	1000	R.N#FSSCSAEDFEK.L	2.68	1.185	N	Y	ADAM9_HUMAN Disintegrin and metalloproteinase domain-containing protein 9
Q13444	ADAM15	237	1000	K.YRDFQHLLN#R.T	0.02	4.288	Y	Y	ADA15_HUMAN Disintegrin and metalloproteinase domain-containing protein 15
Q13444	ADAM15	389	1000	K.TCIMEASTDFLPGLN#FSN#CSR.R	-3.24	2.345	Y	Y	ADA15_HUMAN Disintegrin and metalloproteinase domain-containing protein 15
Q13444	ADAM15	392	1000	K.TCIMEASTDFLPGLN#FSN#CSR.R	-3.24	2.345	Y	Y	ADA15_HUMAN Disintegrin and metalloproteinase domain-containing protein 15
Q13641	TPBG	81	1000	R.N#LTEVPTDLPAYVR.N	-0.36	4.5	Y	Y	TPBG_HUMAN Trophoblast glycoprotein
Q13641	TPBG	166	20.354	R.QLDLSHNPLADLSPFAFSGSN#ASVSAPSPLVELILNHIVPPEDERQN#R.S	3.04	3.456	Y	Y	TPBG_HUMAN Trophoblast glycoprotein
Q13641	TPBG	181	0	R.QLDLSHNPLADLSPFAFSGSN#ASVSAPSPLVELILN#HIVPPEDERQNR.S	2.1	1.683	Y	Y	TPBG_HUMAN Trophoblast glycoprotein
Q13641	TPBG	192	18.957	R.QLDLSHNPLADLSPFAFSGSN#ASVSAPSPLVELILNHIVPPEDERQN#R.S	3.04	3.456	Y	Y	TPBG_HUMAN Trophoblast glycoprotein
Q13641	TPBG	256	132.25	R.N#LTHLESLHLEDNALK.V	0.19	5.172	Y	Y	TPBG_HUMAN Trophoblast glycoprotein
Q13641	TPBG	275	1000	K.VLHN#GTLAELQGLPHIR.V	-1.08	6.98	Y	Y	TPBG_HUMAN Trophoblast glycoprotein
Q13740	ALCAM	95	76.733	R.LNLSEN#YTLSISNAR.I	-0.09	4.615	Y	Y	CD166_HUMAN CD166 antigen
Q13740	ALCAM	167	1000	K.LGDCISEDSYPDGN#ITWYR.N	0.19	1.836	Y	Y	CD166_HUMAN CD166 antigen
Q13740	ALCAM	265	1000	K.EGDN#ITLK.C	-0.28	1.069	Y	Y	CD166_HUMAN CD166 antigen
Q13740	ALCAM	306	1000	R.RN#ATGDYK.C	-0.08	2.004	Y	Y	CD166_HUMAN CD166 antigen
Q13740	ALCAM	361	1000	R.N#ATVVWM*K.D	2.87	2.184	Y	Y	CD166_HUMAN CD166 antigen
Q13740	ALCAM	480	109.943	K.IIISPEEN#VTLTCTAENQLER.T	-0.04	5.09	Y	Y	CD166_HUMAN CD166 antigen
Q13740-2	ALCAM	499	76.733	R.TVNSLN#VSANENR.E	-8.7	3.44	Y	Y	CD166_HUMAN Isoform 2 of CD166 antigen
Q13813	SPTAN1	1356	1000	R.FLSDFRDLM*SWIN#GIR.G	2.16	2.763	N	Y	SPTN1_HUMAN Spectrin alpha chain, non-erythrocytic 1
Q14118	DAG1	641	1000	K.LAFAFGDRN#CSTITLQN#ITR.G	-0.1	5.731	Y	Y	DAG1_HUMAN Dystroglycan
Q14118	DAG1	649	1000	K.KLAFAFGDRN#CSTITLQN#ITR.G	0.5	7.236	Y	Y	DAG1_HUMAN Dystroglycan
Q14126	DSG2	112	1000	K.DTGELN#VTSILDREETPFFLLTGYALDAR.G	0.12	5.433	Y	Y	DSG2_HUMAN Desmoglein-2
Q14126	DSG2	182	84.609	K.IN#ATDADEPNTLNSK.I	-0.23	2.946	Y	Y	DSG2_HUMAN Desmoglein-2
Q14126	DSG2	462	1000	R.YVQN#GTYTVK.I	-0.3	3.929	Y	Y	DSG2_HUMAN Desmoglein-2
Q14542	SLC29A2	48	1000	R.LAGAGN#STAR.I	1.3	2.375	Y	Y	S29A2_HUMAN Equilibrative nucleoside transporter 2
Q14956	GPNMB	249	35.777	K.NDRN#SSDETFLK.D	-1.04	4.386	Y	Y	GPNMB_HUMAN Transmembrane glycoprotein NMB
Q15043	SLC39A14	77	1000	R.GN#VTQHVQGHR.N	-0.3	3.739	Y	Y	S39AE_HUMAN Zinc transporter ZIP14
Q15223	PVRL1	72	1000	K.STN#GSK.Q	-0.29	2.354	Y	Y	PVRL1_HUMAN Poliovirus receptor-related protein 1
Q15223	PVRL1	202	30.835	R.NPN#GTVTVISR.Y	-0.14	2.683	Y	Y	PVRL1_HUMAN Poliovirus receptor-related protein 1
Q15223	PVRL1	297	1000	K.GVEAQN#R.T	-0.73	2.729	Y	Y	PVRL1_HUMAN Poliovirus receptor-related protein 1
Q15262	PTPRK	416	1000	R.RIAVDWESLGYN#ITR.C	0.2	3.506	Y	Y	PTPRK_HUMAN Receptor-type tyrosine-protein phosphatase kappa
Q15262	PTPRK	436	1000	R.GHN#ESK.A	-0.87	1.262	Y	Y	PTPRK_HUMAN Receptor-type tyrosine-protein phosphatase kappa
Q15262	PTPRK	462	65.246	K.APQHVVNHLPPYTN#VSLK.M	4.15	4.717	Y	Y	PTPRK_HUMAN Receptor-type tyrosine-protein phosphatase kappa
Q15303	ERBB4	358	1000	K.FIN#CTK.I	1.12	2.373	Y	Y	ERBB4_HUMAN Receptor tyrosine-protein kinase erbB-4
Q15303	ERBB4	576	1000	K.MEDGLLTCHGPGPDN#CTK.C	-0.09	3.518	Y	Y	ERBB4_HUMAN Receptor tyrosine-protein kinase erbB-4
Q15758	SLC1A5	212	1000	R.SYSTTYEERN#ITGTR.V	-0.01	3.04	Y	Y	AAAT_HUMAN Neutral amino acid transporter B(0)
Q15768	EFNB3	210	18.805	K.ENLPGDPTSN#ATSR.G	-0.71	2.048	Y	Y	EFNB3_HUMAN Ephrin-B3
Q15904	ATP6AP1	261	1000	K.QPVSPVIHPPVSYN#DTAPR.I	3	4.337	Y	Y	VAS1_HUMAN V-type proton ATPase subunit S1
Q16563	SYPL1	71	27.121	K.GQTEIQVNCPPAVTEN#K.T	-0.2	1.987	Y	Y	SYPL1_HUMAN Synaptophysin-like protein 1
Q29980	MICB	234	1000	R.N#ITLTWR.Q	-3.88	2.899	Y	N	MICB_HUMAN MHC class I polypeptide-related sequence B
Q29983	MICA	79	1000	R.AKPQGQWAEDVLGN#KTWDRETR.D	0	3.535	Y	Y	MICA_HUMAN MHC class I polypeptide-related sequence A
Q29983	MICA	125	1000	R.VCEIHEDN#STR.S	-2.09	3.028	Y	Y	MICA_HUMAN MHC class I polypeptide-related sequence A
Q29983	MICA	210	1000	R.TVPPMVN#VTR.S	1.76	2.716	Y	Y	MICA_HUMAN MHC class I polypeptide-related sequence A
Q29983	MICA	220	1000	R.SEASEGN#ITVTCR.A	-0.51	1.895	Y	Y	MICA_HUMAN MHC class I polypeptide-related sequence A
Q3MIR4	TMEM30B	213	11.069	K.FRNPPLVN#GSLALAFQGTAPPPNWR.R	10.82	7.523	Y	Y	CC50B_HUMAN Cell cycle control protein 50B
Q3MIR4	TMEM30B	241	13.378	R.RPVYELSPDPN#NTGFINQDFVVWM*R.T	-3.98	4.302	Y	Y	CC50B_HUMAN Cell cycle control protein 50B
Q3MIR4	TMEM30B	273	1000	R.IRQGN#YSAGLPR.G	-0.66	4.843	Y	Y	CC50B_HUMAN Cell cycle control protein 50B
Q3MIR4	TMEM30B	286	36.556	R.GAYRVN#ITYNYPVR.A	-0.77	3.865	Y	Y	CC50B_HUMAN Cell cycle control protein 50B
Q3ZCQ3	FAM174B	53	1000	R.ESRPPPGPGPGN#TTR.F	-0.46	3.955	N	Y	F174B_HUMAN Membrane protein FAM174B
Q4KMQ2	ANO6	493	30.835	K.NIN#GTDPIQK.Y	-0.42	2.634	Y	Y	ANO6_HUMAN Anoctamin-6
Q4KMQ2	ANO6	802	29.667	K.GNPYSDLGN#HTTCR.Y	-0.19	1.937	Y	Y	ANO6_HUMAN Anoctamin-6
Q58DX5	NAALADL2	295	37.54	K.N#VTNQIALLK.L	-0.65	3.465	Y	Y	NADL2_HUMAN Inactive N-acetylated-alpha-linked acidic dipeptidase-like protein 2
Q58DX5	NAALADL2	556	48.874	K.NNFN#CTR.R	-5.46	2.439	Y	Y	NADL2_HUMAN Inactive N-acetylated-alpha-linked acidic dipeptidase-like protein 2
Q58EX2	SDK2	577	1000	R.VISAGGN#DSR.S	0.3	2.002	Y	Y	SDK2_HUMAN Protein sidekick-2
Q58EX2	SDK2	936	33.657	R.ISWEEYN#RTNTR.V	-0.31	3.067	Y	Y	SDK2_HUMAN Protein sidekick-2
Q5HYA8	TMEM67	179	1000	R.CEPTFVN#TSR.S	-0.44	1.304	Y	Y	MKS3_HUMAN Meckelin
Q5MY95	ENTPD8	135	1000	R.KN#SSQAR.D	-1.1	2.034	Y	Y	ENTP8_HUMAN Ectonucleoside triphosphate diphosphohydrolase 8
Q5SZK8	FREM2	2121	1000	K.ATVSIN#DSVSDLPK.M	6.64	1.987	Y	N	FREM2_HUMAN FRAS1-related extracellular matrix protein 2
Q5VU97	CACHD1	329	24.437	R.STNN#NTK.F	-0.08	2.481	Y	Y	CAHD1_HUMAN VWFA and cache domain-containing protein 1
Q5VW38	GPR107	169	12.79	K.VLGQSQEPNVNPASAGN#QTQK.T	-0.2	1.867	Y	Y	GP107_HUMAN Protein GPR107
Q5VY80	RAET1L	68	1000	K.TFLHYDCGN#K.T	-10.72	1.868	Y	N	RET1L_HUMAN Retinoic acid early transcript 1L protein
Q5ZPR3	CD276	91	1000	K.QLVHSFAEGQDQGSAYAN#R.T	2.17	2.435	Y	Y	CD276_HUMAN CD276 antigen
Q5ZPR3	CD276	104	1000	R.TALFPDLLAQGN#ASLR.L	1.5	5.566	Y	Y	CD276_HUMAN CD276 antigen
Q5ZPR3	CD276	215	1000	R.VVLGAN#GTYSCLVR.N	0.3	2.795	Y	Y	CD276_HUMAN CD276 antigen
Q5ZPR3	CD276	309	1000	R.DQGSAYAN#R.T	-0.24	3.123	Y	Y	CD276_HUMAN CD276 antigen
Q658P3	STEAP3	344	1000	K.QVLAN#K.S	-0.33	2.686	Y	Y	STEA3_HUMAN Metalloreductase STEAP3
Q6EMK4	VASN	117	1000	R.LHEITN#ETFR.G	0.17	2.882	Y	Y	VASN_HUMAN Vasorin
Q6H3X3	RAET1G	82	1000	K.KLN#VTTAWK.A	-0.17	5.874	Y	Y	RET1G_HUMAN Retinoic acid early transcript 1G protein
Q6P4Q7	CNNM4	85	33.657	R.LYGYSLGN#ISSNLISFTEVDDAETLHK.S	-1.24	5.844	Y	Y	CNNM4_HUMAN Metal transporter CNNM4
Q6P4Q7	CNNM4	122	1000	K.DLVVQQLVN#VSRGN#TSGVLVVLTK.F	4.99	5.128	Y	Y	CNNM4_HUMAN Metal transporter CNNM4
Q6P4Q7	CNNM4	127	1000	R.GN#TSGVLVVLTK.F	0.09	2.422	Y	Y	CNNM4_HUMAN Metal transporter CNNM4
Q6PCB8	EMB	83	0.645	K.NITLERPSN#VN#LTCQFTTSGDLNAVN#VTWKK.D	7.07	3.485	Y	Y	EMB_HUMAN Embigin
Q6PCB8	EMB	85	0.336	K.NITLERPSN#VN#LTCQFTTSGDLNAVN#VTWKK.D	7.07	3.485	Y	Y	EMB_HUMAN Embigin
Q6PCB8	EMB	100	1.723	K.NITLERPSN#VN#LTCQFTTSGDLNAVN#VTWKK.D	7.07	3.485	Y	Y	EMB_HUMAN Embigin
Q6PCB8	EMB	213	1000	K.YVIN#GTYAN#ETK.L	1.07	3.314	Y	Y	EMB_HUMAN Embigin
Q6PCB8	EMB	218	1000	K.YVIN#GTYAN#ETK.L	1.07	3.314	Y	Y	EMB_HUMAN Embigin
Q6UWV2	MPZL3	123	1000	K.DN#GTFSCAVK.N	8.75	1.289	Y	N	MPZL3_HUMAN Myelin protein zero-like protein 3
Q6UXD5	SEZ6L2	641	1000	K.EVPRN#DTCPELPPPEWGWR.T	-1.02	4.846	Y	Y	SE6L2_HUMAN Seizure 6-like protein 2
Q6UXG2	KIAA1324	391	12.218	K.TNN#STCQPCPYGSYSN#GSDCTR.C	-0.01	3.634	Y	Y	K1324_HUMAN UPF0577 protein KIAA1324
Q6UXG2	KIAA1324	404	85.265	K.TNN#STCQPCPYGSYSN#GSDCTR.C	-0.01	3.634	Y	Y	K1324_HUMAN UPF0577 protein KIAA1324
Q6UXG2	KIAA1324	672	5.085	R.TFNYN#FSALANTVTLAGGPSFTSK.G	3.8	1.321	Y	Y	K1324_HUMAN UPF0577 protein KIAA1324
Q6UXI9	NPNT	273	1000	K.GN#GTILK.G	0.32	1.725	Y	Y	NPNT_HUMAN Nephronectin
Q6YHK3	CD109	118	1000	R.TQDEILFSN#STR.L	-0.37	2.403	Y	Y	CD109_HUMAN CD109 antigen
Q6YHK3	CD109	419	1000	K.IN#YTVPQSGTFK.I	5.3	2.83	Y	Y	CD109_HUMAN CD109 antigen
Q6ZMP0	THSD4	709	1000	R.QVYAN#R.S	0.22	1.988	Y	Y	THSD4_HUMAN Thrombospondin type-1 domain-containing protein 4
Q6ZUK4	TMEM26	110	52.403	R.KEDFN#QTLTSNEQTSR.A	-7.52	2.082	Y	Y	TMM26_HUMAN Transmembrane protein 26
Q7KYR7	BTN2A1	216	58.815	R.N#MSCSIN#NTLLGQKK.E	1.7	4.036	Y	Y	BT2A1_HUMAN Butyrophilin subfamily 2 member A1
Q7KYR7	BTN2A1	222	17.009	R.N#MSCSIN#NTLLGQKK.E	1.7	4.036	Y	Y	BT2A1_HUMAN Butyrophilin subfamily 2 member A1
Q7Z5N4	SDK1	782	75.102	R.TN#QSIM*VQWQPPPETEHNGVLR.G	-1.04	3.43	Y	Y	SDK1_HUMAN Protein sidekick-1
Q7Z5N4	SDK1	1767	1000	K.N#LTSHTK.Y	-0.18	2.172	Y	Y	SDK1_HUMAN Protein sidekick-1
Q86SQ4	GPR126	143	1000	K.GFN#ASYIR.V	-0.47	2.234	Y	Y	GP126_HUMAN G-protein coupled receptor 126
Q86SQ4	GPR126	505	24.437	K.NN#ESLDEGLR.L	-1.11	3.951	Y	Y	GP126_HUMAN G-protein coupled receptor 126
Q86UF1	TSPAN33	172	4.691	K.DWSQNMYFN#CSEDNPSRER.C	0.99	2.286	Y	Y	TSN33_HUMAN Tetraspanin-33
Q86WC4	OSTM1	135	1000	R.AAGN#TSESQSCAR.S	-1.39	4.373	Y	N	OSTM1_HUMAN Osteopetrosis-associated transmembrane protein 1
Q8IWA5	SLC44A2	187	1000	K.GVLMVGN#ETTYEDGHGSRKN#ITDLVEGAK.K	0.57	3.728	Y	Y	CTL2_HUMAN Choline transporter-like protein 2
Q8IWA5	SLC44A2	200	1000	K.N#ITDLVEGAK.K	-1.11	1.999	Y	Y	CTL2_HUMAN Choline transporter-like protein 2
Q8IWA5	SLC44A2	417	132.105	K.TCNPETFPSSN#ESR.Q	-0.39	5.22	Y	Y	CTL2_HUMAN Choline transporter-like protein 2
Q8IWT6	LRRC8A	66	1000	K.DSCN#DSFR.G	-0.27	2.483	Y	Y	LRC8A_HUMAN Leucine-rich repeat-containing protein 8A
Q8IWU5	SULF2	132	1000	R.TFAVYLN#STGYR.T	1.09	2.375	Y	Y	SULF2_HUMAN Extracellular sulfatase Sulf-2
Q8IWU5	SULF2	171	1000	R.FYN#YTLCR.N	-0.35	3.039	Y	Y	SULF2_HUMAN Extracellular sulfatase Sulf-2
Q8N0Z9	VSIG10	347	1000	R.N#LTQPEVIIQPSSR.H	4.47	3.186	Y	Y	VSI10_HUMAN V-set and immunoglobulin domain-containing protein 10
Q8N271	PROM2	725	1000	R.N#VSECFLAR.E	4.18	3.001	Y	Y	PROM2_HUMAN Prominin-2
Q8N3J6	CADM2	291	1000	K.TDN#GTYR.C	-7.85	1.148	Y	N	CADM2_HUMAN Cell adhesion molecule 2
Q8N441	FGFRL1	231	1000	R.AGAIN#ATYK.V	0.34	2.026	Y	N	FGRL1_HUMAN Fibroblast growth factor receptor-like 1
Q8N6C5	IGSF1	607	1000	K.N#LTLWCR.S	0.38	2.943	Y	Y	IGSF1_HUMAN Immunoglobulin superfamily member 1
Q8N6C5	IGSF1	1223	1000	K.GIGN#YSCSYR.L	3.92	3.921	Y	Y	IGSF1_HUMAN Immunoglobulin superfamily member 1
Q8N8Z6	DCBLD1	64	47.574	K.NYPGTYPN#HTVCEK.T	-1.49	3.474	Y	Y	DCBD1_HUMAN Discoidin, CUB and LCCL domain-containing protein 1
Q8NAC3	IL17RC	443	18.978	K.GHPNLCVQVN#SSEK.L	1.71	1.441	N	Y	I17RC_HUMAN Interleukin-17 receptor C
Q8NBN3	TMEM87A	157	1000	K.QEAKEN#GTN#LTFIGDK.T	-0.13	2.389	Y	Y	TM87A_HUMAN Transmembrane protein 87A
Q8NBN3	TMEM87A	160	1000	K.QEAKEN#GTN#LTFIGDK.T	-0.13	2.389	Y	Y	TM87A_HUMAN Transmembrane protein 87A
Q8NC42	RNF149	131	100.017	R.RN#ASAVVLYNEER.Y	0.02	3.69	Y	Y	RN149_HUMAN E3 ubiquitin-protein ligase RNF149
Q8NCS7	SLC44A5	416	1000	K.VIAPGGHCIHEN#QTCDPEIFN#TTEIAK.A	-2.24	2.922	Y	N	CTL5_HUMAN Choline transporter-like protein 5
Q8NCS7	SLC44A5	425	1000	K.VIAPGGHCIHEN#QTCDPEIFN#TTEIAK.A	-2.24	2.922	Y	N	CTL5_HUMAN Choline transporter-like protein 5
Q8NE01	CNNM3	73	1000	R.LFGPGFAN#SSWSWVAPEGAGCREEAASPAGEWR.A	-0.32	1.93	N	Y	CNNM3_HUMAN Metal transporter CNNM3
Q8NFZ8	CADM4	67	1000	R.QTLFFN#GTR.A	5.58	3.834	Y	Y	CADM4_HUMAN Cell adhesion molecule 4
Q8NFZ8	CADM4	259	7.971	R.WN#RGNESLPER.A	-0.63	4.073	Y	Y	CADM4_HUMAN Cell adhesion molecule 4
Q8NFZ8	CADM4	262	13.38	R.WNRGN#ESLPER.A	-6.15	2.26	Y	Y	CADM4_HUMAN Cell adhesion molecule 4
Q8TAB3	PCDH19	546	1000	K.DGGLPSLQSN#ATVR.V	0.23	1.735	Y	Y	PCD19_HUMAN Protocadherin-19
Q8TB96	ITFG1	353	25.174	K.N#TSGSNQQAFLLENVPCNN#ASCEEARR.M	4.96	4.006	Y	Y	TIP_HUMAN T-cell immunomodulatory protein
Q8TB96	ITFG1	371	7.71	K.N#TSGSNQQAFLLENVPCNN#ASCEEARR.M	4.96	4.006	Y	Y	TIP_HUMAN T-cell immunomodulatory protein
Q8TC71	SPATA18	495	1000	K.GEAVTRRGAFWN#SVRSVSR.C	1.28	1.26	Y	N	MIEAP_HUMAN Mitochondria-eating protein
Q8TCJ2	STT3B	628	0	R.TTLVDNNTWNN#SHIALVGK.A	-0.03	2.716	N	Y	STT3B_HUMAN Dolichyl-diphosphooligosaccharide--protein glycosyltransferase subunit STT3B
Q8TCT8	SPPL2A	149	1000	K.DFRDM*N#QTLGDN#ITVK.M	1.99	2.338	Y	Y	SPP2A_HUMAN Signal peptide peptidase-like 2A
Q8TCT8	SPPL2A	155	1000	K.DFRDM*N#QTLGDN#ITVK.M	1.99	2.338	Y	Y	SPP2A_HUMAN Signal peptide peptidase-like 2A
Q8WTV0	SCARB1	102	76.733	K.SN#ITFNNN#DTVSFLEYR.T	-0.62	5.071	Y	Y	SCRB1_HUMAN Scavenger receptor class B member 1
Q8WTV0	SCARB1	108	24.437	K.SN#ITFNNN#DTVSFLEYR.T	-0.62	5.071	Y	Y	SCRB1_HUMAN Scavenger receptor class B member 1
Q8WWI5	SLC44A1	180	1000	R.CAPVN#ISCYAK.F	0.14	3.588	N	Y	CTL1_HUMAN Choline transporter-like protein 1
Q8WWY8	LIPH	357	1000	K.AGN#TTESK.I	-0.65	2.717	Y	Y	LIPH_HUMAN Lipase member H
Q8WXI7	MUC16	12416	1000	R.KFN#TTER.V	-1.21	1.693	Y	Y	MUC16_HUMAN Mucin-16
Q92508	PIEZO1	2294	1000	R.ELYN#GTADITLR.F	8.46	3.79	Y	Y	PIEZ1_HUMAN Piezo-type mechanosensitive ion channel component 1
Q92508	PIEZO1	2331	1000	K.HMLALAPN#STAR.R	0.68	2.759	Y	Y	PIEZ1_HUMAN Piezo-type mechanosensitive ion channel component 1
Q92542	NCSTN	387	1000	R.TSLELWM*HTDPVSQKN#ESVR.N	0.06	4.161	Y	Y	NICA_HUMAN Nicastrin
Q92542	NCSTN	417	1000	R.RPN#QSQPLPPSSLQR.F	-0.56	1.443	Y	Y	NICA_HUMAN Nicastrin
Q92542	NCSTN	612	1000	K.DLYEYSWVQGPLHSN#ETDRLPR.C	1.09	5.311	Y	Y	NICA_HUMAN Nicastrin
Q92823	NRCAM	223	1000	R.FN#HTQTIQQK.Q	-0.54	1.945	Y	Y	NRCAM_HUMAN Neuronal cell adhesion molecule
Q92823	NRCAM	276	45.026	R.ERPPTFLTPEGN#ASNK.E	0.96	4.873	Y	Y	NRCAM_HUMAN Neuronal cell adhesion molecule
Q92823	NRCAM	858	28.934	R.VNVVN#STLAEVHWDPVPLK.S	-0.39	4.496	Y	Y	NRCAM_HUMAN Neuronal cell adhesion molecule
Q92823	NRCAM	1019	48.874	K.NLN#FSTR.Y	-2.53	2.794	Y	Y	NRCAM_HUMAN Neuronal cell adhesion molecule
Q92854	SEMA4D	379	71.753	R.AAN#YTSSLNLPDK.T	4.88	1.967	Y	Y	SEM4D_HUMAN Semaphorin-4D
Q96HA4	C1orf159	104	1000	R.CGN#GTLPAYN#GSECR.S	-0.14	1.958	Y	Y	CA159_HUMAN Uncharacterized protein C1orf159
Q96HA4	C1orf159	111	1000	R.CGN#GTLPAYN#GSECR.S	-0.14	1.958	Y	Y	CA159_HUMAN Uncharacterized protein C1orf159
Q96HA4	C1orf159	128	1000	R.SFAGPGAPFPMN#R.S	2.9	3.621	Y	Y	CA159_HUMAN Uncharacterized protein C1orf159
Q96K49	TMEM87B	68	1000	K.TMFN#STDIK.L	2.09	2.104	Y	Y	TM87B_HUMAN Transmembrane protein 87B
Q96NT5	SLC46A1	58	1000	R.FSADLGYN#GTR.Q	-0.66	4.023	Y	Y	PCFT_HUMAN Proton-coupled folate transporter
Q96NY8	PVRL4	281	1000	K.CLSEGQPPPSYN#WTR.L	-0.15	1.583	Y	Y	PVRL4_HUMAN Poliovirus receptor-related protein 4
Q96QE2	SLC2A13	433	1000	R.ITFKPIAPSGQN#ATCTR.Y	4.28	2.757	Y	Y	MYCT_HUMAN Proton myo-inositol cotransporter
Q96RD7	PANX1	255	1000	K.SGILRN#DSTVPDQFQCK.L	4.29	2.752	Y	Y	PANX1_HUMAN Pannexin-1
Q99523	SORT1	162	24.437	K.DITDLIN#NTFIR.T	0.92	4.376	Y	Y	SORT_HUMAN Sortilin
Q99571	P2RX4	75	1000	K.GVAVTN#TSK.L	-0.48	2.328	Y	Y	P2RX4_HUMAN P2X purinoceptor 4
Q9BRN9	TM2D3	157	1000	R.QRYPAN#CTVR.D	-3.5	3.531	N	Y	TM2D3_HUMAN TM2 domain-containing protein 3
Q9BTN0	LRFN3	339	1000	R.LLGN#SSR.A	-0.61	1.936	N	Y	LRFN3_HUMAN Leucine-rich repeat and fibronectin type-III domain-containing protein 3
Q9BXC0	HCAR1	3	1000	-.M*YN#GSCCR.I	0.27	1.368	Y	Y	HCAR1_HUMAN Hydroxycarboxylic acid receptor 1
Q9BY67	CADM1	101	1000	R.FQLLN#FSSSELK.V	-0.34	3.41	Y	Y	CADM1_HUMAN Cell adhesion molecule 1
Q9BY67	CADM1	113	1000	K.VSLTN#VSISDEGR.Y	5.67	4.015	Y	Y	CADM1_HUMAN Cell adhesion molecule 1
Q9BZC7	ABCA2	1549	1000	K.SPAN#GSLGPTLN#LSSGESR.L	0.25	2.898	Y	Y	ABCA2_HUMAN ATP-binding cassette sub-family A member 2
Q9BZC7	ABCA2	1557	1000	K.SPAN#GSLGPTLN#LSSGESR.L	0.25	2.898	Y	Y	ABCA2_HUMAN ATP-binding cassette sub-family A member 2
Q9BZR6	RTN4R	372	1000	K.GRVPPGDSPPGN#GSGPR.H	0.06	1.254	Y	N	RTN4R_HUMAN Reticulon-4 receptor
Q9C0C4	SEMA4C	106	24.437	K.NN#QTECFNFIR.F	3.55	4.095	Y	Y	SEM4C_HUMAN Semaphorin-4C
Q9C0C4	SEMA4C	121	1000	R.FLQPYN#ASHLYVCGTYAFQPK.C	1.56	3.247	Y	Y	SEM4C_HUMAN Semaphorin-4C
Q9C0C4	SEMA4C	522	1000	R.DPYCAWSVN#TSR.C	-0.28	1.453	Y	Y	SEM4C_HUMAN Semaphorin-4C
Q9H0U3	MAGT1	71	1000	K.APPRN#YSVIVMFTALQLHR.Q	6.45	6.879	Y	Y	MAGT1_HUMAN Magnesium transporter protein 1
Q9H0X4	ITFG3	116	48.874	K.NTN#SSNN#FSR.S	-4.05	2.58	Y	Y	ITFG3_HUMAN Protein ITFG3
Q9H0X4	ITFG3	120	24.437	K.NTN#SSNN#FSR.S	-4.05	2.58	Y	Y	ITFG3_HUMAN Protein ITFG3
Q9H0X4	ITFG3	314	1000	K.SDPHWESMLN#ATTR.R	-0.01	3.344	Y	Y	ITFG3_HUMAN Protein ITFG3
Q9H0X4	ITFG3	389	1000	R.YKPDTLAVAVEN#GTGTDR.Q	-0.21	2.305	Y	Y	ITFG3_HUMAN Protein ITFG3
Q9H2X9	SLC12A5	333	1000	K.LAWEGN#ETVTTR.L	-0.99	2.338	N	Y	S12A5_HUMAN Solute carrier family 12 member 5
Q9H2X9	SLC12A5	351	9.107	R.FLN#ATCDEYFTRN#NVTEIQGIPGAASGLIK.E	0.72	2.564	N	Y	S12A5_HUMAN Solute carrier family 12 member 5
Q9H2X9	SLC12A5	361	0.845	R.FLNATCDEYFTRN#N#VTEIQGIPGAASGLIK.E	0.72	2.336	N	Y	S12A5_HUMAN Solute carrier family 12 member 5
Q9H2X9	SLC12A5	362	0.645	R.FLNATCDEYFTRN#N#VTEIQGIPGAASGLIK.E	0.72	2.336	N	Y	S12A5_HUMAN Solute carrier family 12 member 5
Q9H6X2	ANTXR1	184	1000	K.DFN#ETQLAR.I	-0.06	3.037	Y	Y	ANTR1_HUMAN Anthrax toxin receptor 1
Q9H8M5	CNNM2	112	24.437	R.VYGQNINN#ETWSR.I	-0.45	3.844	Y	Y	CNNM2_HUMAN Metal transporter CNNM2
Q9HC56	PCDH9	450	1000	K.IVASDSGKPSLN#QTALVR.V	1.97	3.632	Y	Y	PCDH9_HUMAN Protocadherin-9
Q9HC58	SLC24A3	86	31.596	K.N#CTEPALHEFPNDIFTNEDRR.Q	-0.97	4.103	N	Y	NCKX3_HUMAN Sodium/potassium/calcium exchanger 3
Q9HCN3	TMEM8A	232	1000	R.DCVSN#GSLGCPVR.L	-8.69	1.12	Y	Y	TMM8A_HUMAN Transmembrane protein 8A
Q9HCN3	TMEM8A	535	1000	R.GWSCTDN#STAQTVAQQR.A	0.3	2.113	Y	Y	TMM8A_HUMAN Transmembrane protein 8A
Q9HCU4	CELSR2	1032	0	R.LLDRNDNPPVLGNFEILFNN#YVTNR.S	0.27	6.704	Y	Y	CELR2_HUMAN Cadherin EGF LAG seven-pass G-type receptor 2
Q9HCU4	CELSR2	1036	20.167	R.LLDRNDNPPVLGNFEILFNNYVTN#R.S	0.53	9.089	Y	Y	CELR2_HUMAN Cadherin EGF LAG seven-pass G-type receptor 2
Q9HCU4	CELSR2	1076	115.01	R.GNELSLVLLN#ASTGELK.L	2.56	4.733	Y	Y	CELR2_HUMAN Cadherin EGF LAG seven-pass G-type receptor 2
Q9HCU4	CELSR2	1501	1000	R.FGSVLGN#YSCAAQGTQGGSKK.S	1.28	5.352	Y	Y	CELR2_HUMAN Cadherin EGF LAG seven-pass G-type receptor 2
Q9HCU4	CELSR2	1565	6.591	R.HIDM*ADFIANN#GTVPGCPAK.K	7.41	2.113	Y	Y	CELR2_HUMAN Cadherin EGF LAG seven-pass G-type receptor 2
Q9HCU4	CELSR2	1741	1000	R.LHGLHLSN#ITVGGIPGPAGGVAR.G	-1.13	5.644	Y	Y	CELR2_HUMAN Cadherin EGF LAG seven-pass G-type receptor 2
Q9HCU4	CELSR2	1900	1000	K.GFDPDCN#K.T	-0.6	2.562	Y	Y	CELR2_HUMAN Cadherin EGF LAG seven-pass G-type receptor 2
Q9HCU4	CELSR2	2024	0	R.GWLPPNLFN#CTSITFSELK.G	4.17	1.812	Y	Y	CELR2_HUMAN Cadherin EGF LAG seven-pass G-type receptor 2
Q9HCU4	CELSR2	2043	1000	R.LQRN#ESGLDSGR.S	-0.29	4.394	Y	Y	CELR2_HUMAN Cadherin EGF LAG seven-pass G-type receptor 2
Q9HCU4	CELSR2	2061	1000	R.N#ATQHTAGYFGSDVK.V	-0.1	2	Y	Y	CELR2_HUMAN Cadherin EGF LAG seven-pass G-type receptor 2
Q9HDC9	APMAP	160	1000	R.AGPN#GTLFVADAYK.G	-0.01	2.477	Y	Y	APMAP_HUMAN Adipocyte plasma membrane-associated protein
Q9NPH3	IL1RAP	107	1000	K.DVLWFRPTLLN#DTGN#YTCMLR.N	8.73	4.961	Y	Y	IL1AP_HUMAN Interleukin-1 receptor accessory protein
Q9NPH3	IL1RAP	111	1000	K.DVLWFRPTLLN#DTGN#YTCMLR.N	8.73	4.961	Y	Y	IL1AP_HUMAN Interleukin-1 receptor accessory protein
Q9NPH3	IL1RAP	118	1000	R.N#TTYCSK.V	-0.83	2.247	Y	Y	IL1AP_HUMAN Interleukin-1 receptor accessory protein
Q9NPR2	SEMA4B	405	1000	R.KIN#SSLQLPDR.V	-0.09	3.631	Y	Y	SEM4B_HUMAN Semaphorin-4B
Q9NV96	TMEM30A	107	1000	K.CLSPDVTPCFCTIN#FTLEK.S	-3.07	1.824	N	Y	CC50A_HUMAN Cell cycle control protein 50A
Q9NV96	TMEM30A	294	6.039	R.YSLN#VTYNYPVHYFDGR.K	0.36	1.971	N	Y	CC50A_HUMAN Cell cycle control protein 50A
Q9NYQ6	CELSR1	1576	1000	K.DIGN#YSCAAQGTQTGSKK.S	2.14	4.152	Y	Y	CELR1_HUMAN Cadherin EGF LAG seven-pass G-type receptor 1
Q9NYQ6	CELSR1	1640	9.34	K.NVDMAGFIANN#GTR.E	3.73	3.286	Y	Y	CELR1_HUMAN Cadherin EGF LAG seven-pass G-type receptor 1
Q9NYQ6	CELSR1	1979	1000	K.GFDPDCN#KTN#GQCQCK.E	3.51	1.204	Y	Y	CELR1_HUMAN Cadherin EGF LAG seven-pass G-type receptor 1
Q9NYQ6	CELSR1	1982	1000	K.GFDPDCN#KTN#GQCQCK.E	3.51	1.204	Y	Y	CELR1_HUMAN Cadherin EGF LAG seven-pass G-type receptor 1
Q9NYQ6	CELSR1	2122	1000	K.LSRN#ETQVDGAR.A	-0.56	3.212	Y	Y	CELR1_HUMAN Cadherin EGF LAG seven-pass G-type receptor 1
Q9NZU0	FLRT3	226	24.243	K.VFFNLVN#LTELSLVR.N	-0.45	2.353	N	Y	FLRT3_HUMAN Leucine-rich repeat transmembrane protein FLRT3
Q9P055	JKAMP	37	1000	K.N#GSTEIYGECGVCPR.G	1.28	2.133	Y	Y	JKAMP_HUMAN JNK1/MAPK8-associated membrane protein
Q9P0K1	ADAM22	519	16.198	R.ETCSGN#SSQCAPNIHK.M	0.41	1.053	Y	Y	ADA22_HUMAN Disintegrin and metalloproteinase domain-containing protein 22
Q9P2B2	PTGFRN	286	1000	K.N#VSVAEGK.E	-0.28	3.152	Y	Y	FPRP_HUMAN Prostaglandin F2 receptor negative regulator
Q9P2B2	PTGFRN	300	1000	K.ELDLTCN#ITTDRADDVRPEVTWSFSR.M	-0.03	4.501	Y	Y	FPRP_HUMAN Prostaglandin F2 receptor negative regulator
Q9P2B2	PTGFRN	525	24.437	K.QRN#NSWVK.S	-7.53	2.158	Y	Y	FPRP_HUMAN Prostaglandin F2 receptor negative regulator
Q9P2B2	PTGFRN	600	1000	R.YSVLIMAEKPVGDLSSPN#ETK.Y	1.54	5.405	Y	Y	FPRP_HUMAN Prostaglandin F2 receptor negative regulator
Q9P2B2	PTGFRN	618	1000	K.LEN#WTDASR.V	4.43	1.804	Y	Y	FPRP_HUMAN Prostaglandin F2 receptor negative regulator
Q9UGT4	SUSD2	162	1000	K.SELVN#ETR.W	-0.19	2.927	Y	Y	SUSD2_HUMAN Sushi domain-containing protein 2
Q9UGT4	SUSD2	494	1000	R.AQPGTMSN#GTETR.G	-0.76	1.261	Y	Y	SUSD2_HUMAN Sushi domain-containing protein 2
Q9UHG3	PCYOX1	323	46.819	R.KMSN#ITFLNFDPPIEEFHQYYQHIVTTLVK.G	0.19	5.349	Y	Y	PCYOX_HUMAN Prenylcysteine oxidase 1
Q9UHN6	TMEM2	171	1000	K.DGSRN#ITLR.T	3.15	1.923	Y	Y	TMEM2_HUMAN Transmembrane protein 2
Q9UHN6	TMEM2	292	1000	K.ILESERFDTHEYRN#ESR.R	7.31	3.252	Y	Y	TMEM2_HUMAN Transmembrane protein 2
Q9UHN6	TMEM2	739	1000	K.TTN#SSAADPR.E	-0.34	3.322	Y	Y	TMEM2_HUMAN Transmembrane protein 2
Q9UHN6	TMEM2	1092	1000	R.QN#GSLSK.I	-0.63	1.506	Y	Y	TMEM2_HUMAN Transmembrane protein 2
Q9UHW9	SLC12A6	398	9.34	K.EINN#MTVPSK.L	1.08	2.739	Y	Y	S12A6_HUMAN Solute carrier family 12 member 6
Q9UIG8	SLCO3A1	153	1000	R.WGAEGRDVCAAN#GSGGDEGPDPDLICR.N	3.2	2.711	Y	Y	SO3A1_HUMAN Solute carrier organic anion transporter family member 3A1
Q9UIW2	PLXNA1	77	1000	K.LSGN#LTLLR.A	-0.7	3.744	Y	Y	PLXA1_HUMAN Plexin-A1
Q9UIW2	PLXNA1	1043	1000	K.YN#YTEDPTILR.I	0.67	2.542	Y	Y	PLXA1_HUMAN Plexin-A1
Q9UJ14	GGT7	586	4.691	R.GLSGLTQVLLNVLTLNRN#LSDSLAR.G	0.5	7.439	Y	N	GGT7_HUMAN Gamma-glutamyltransferase 7
Q9UJW2-2	TINAG	171	0	R.LGTLPPSPMLLSM*NEMTLVSHACYPLFKDQN#ATNN#GCAMASRSDGRGK.R	-4.15	2.065	Y	N	TINAG_HUMAN Isoform 2 of Tubulointerstitial nephritis antigen
Q9UJW2-2	TINAG	175	0	R.LGTLPPSPMLLSM*NEMTLVSHACYPLFKDQN#ATNN#GCAMASRSDGRGK.R	-4.15	2.065	Y	N	TINAG_HUMAN Isoform 2 of Tubulointerstitial nephritis antigen
Q9ULF5	SLC39A10	339	58.699	K.DLNEDDHHHECLN#VTQLLK.Y	-0.36	3.815	Y	Y	S39AA_HUMAN Zinc transporter ZIP10
Q9ULI3	HEG1	1080	1000	K.RTFLN#TTVEK.H	0.96	3.459	Y	N	HEG1_HUMAN Protein HEG homolog 1
Q9UM47	NOTCH3	1179	1000	R.CLHN#GTCVDLVGGFR.C	1.16	5.129	Y	Y	NOTC3_HUMAN Neurogenic locus notch homolog protein 3
Q9UN76	SLC6A14	155	1000	K.N#CSSWSDK.N	4.38	2.025	Y	Y	S6A14_HUMAN Sodium- and chloride-dependent neutral and basic amino acid transporter B(0+)
Q9UN76	SLC6A14	174	30.612	R.SPIVTHCN#VSTVNK.G	0.31	4.235	Y	Y	S6A14_HUMAN Sodium- and chloride-dependent neutral and basic amino acid transporter B(0+)
Q9UN76	SLC6A14	189	1000	K.GIQEIIQM*N#K.S	9.01	1.714	Y	Y	S6A14_HUMAN Sodium- and chloride-dependent neutral and basic amino acid transporter B(0+)
Q9UP38	FZD1	231	1000	K.FPVHGAGELCVGQN#TSDK.G	4	3.437	Y	Y	FZD1_HUMAN Frizzled-1
Q9Y4D7	PLXND1	155	1000	R.RGN#ISAVAVR.F	-0.33	3.066	Y	Y	PLXD1_HUMAN Plexin-D1
Q9Y4D7	PLXND1	500	48.874	K.INLN#ESMQVVSR.R	6.55	4.349	Y	Y	PLXD1_HUMAN Plexin-D1
Q9Y4D7	PLXND1	696	1000	K.AN#FTIYDCSR.T	-0.4	2.817	Y	Y	PLXD1_HUMAN Plexin-D1
Q9Y4L1	HYOU1	515	1000	R.VFGSQN#LTTVK.L	-4.82	3.61	Y	Y	HYOU1_HUMAN Hypoxia up-regulated protein 1
Q9Y4L1	HYOU1	869	1000	K.N#ATLAEQAK.L	0.9	2.771	Y	Y	HYOU1_HUMAN Hypoxia up-regulated protein 1
Q9Y4L1	HYOU1	922	1000	K.DKN#GTRAEPPLN#ASASDQGEK.V	-0.44	3.591	Y	Y	HYOU1_HUMAN Hypoxia up-regulated protein 1
Q9Y4L1	HYOU1	931	1000	R.AEPPLN#ASASDQGEK.V	-0.43	1.757	Y	Y	HYOU1_HUMAN Hypoxia up-regulated protein 1
Q9Y5L3	ENTPD2	129	31.275	R.LLN#LTNPEASTSVLM*AVTHTLTQYPFDFR.G	1.46	2.59	Y	Y	ENTP2_HUMAN Ectonucleoside triphosphate diphosphohydrolase 2
Q9Y5L3	ENTPD2	294	0	R.GFSTQVLLGDVYQSPCTMAQRPQNFN#SSAR.V	0.22	2.322	Y	Y	ENTP2_HUMAN Ectonucleoside triphosphate diphosphohydrolase 2
Q9Y5Y6	ST14	485	1000	R.CDGWADCTDHSDELN#CSCDAGHQFTCK.N	4.96	4.449	Y	Y	ST14_HUMAN Suppressor of tumorigenicity 14 protein
Q9Y639	NPTN	197	73.311	K.N#ASNMEYR.I	-0.16	3.06	Y	Y	NPTN_HUMAN Neuroplastin
Q9Y639	NPTN	229	1000	K.AN#ATIEVK.A	-0.43	3.155	Y	Y	NPTN_HUMAN Neuroplastin
Q9Y639	NPTN	276	1000	K.EN#GMPMDIVN#TSGR.F	1.78	3.222	Y	Y	NPTN_HUMAN Neuroplastin
Q9Y639	NPTN	284	1000	K.EN#GMPMDIVN#TSGR.F	1.78	3.222	Y	Y	NPTN_HUMAN Neuroplastin
Q9Y653	GPR56	303	1000	K.N#SSQVLGEK.V	-0.49	2.211	Y	Y	GPR56_HUMAN G-protein coupled receptor 56
Q9Y6M7	SLC4A7	786	49.59	K.DN#ITAHNISWR.N	9.44	3.883	Y	Y	S4A7_HUMAN Sodium bicarbonate cotransporter 3
Q9Y6M7	SLC4A7	796	1000	R.N#LTVSECK.K	7.06	2.652	Y	Y	S4A7_HUMAN Sodium bicarbonate cotransporter 3
