# Supplementary material for: Quantitative investigation of human cell surface N-glycoprotein dynamics
Source: Royal Society of Chemistry journal article supplement (doi:10.1039/c6sc01814a), 2016-08-15
Supplement: c6sc01814a11.xlsx [file c6sc01814a11.xlsx]

## Sheet: Sheet1
Table S8 - The Half-Lives of 386 Unique Glycosylation Sites
Uniprot ID	Gene Symbol	Site	ModScore	ModScore Peptide	Half-Life in Expt# 1 (h)	Half-Life in Expt# 2 (h)	Median Half-Life (h)	Standard Deviation	PPM	XCorr	Domain Name	Domain Range	Annotation
A1A5B4	ANO9	641	1000	K.EGN#STVDCLK.G	14.59	N/A	14.59	N/A	-5.46	1.685			ANO9_HUMAN Anoctamin-9
A8MWY0	KIAA1324L	560	1000	K.N#ATFTFTWAFQR.T	N/A	150.64	150.64	N/A	2.24	4.228			K132L_HUMAN UPF0577 protein KIAA1324-like
F2Z333	C1orf233	109	1000	R.AFALN#CSWR.G	20.43	N/A	20.43	N/A	-0.48	3.091	Fibronectin type-III	74-166	CA233_HUMAN Fibronectin type-III domain-containing transmembrane protein C1orf233
O14494	PPAP2A	142	1000	K.IN#CSDGYIEYYICR.G	N/A	15.81	15.81	N/A	2.09	2.133			LPP1_HUMAN Lipid phosphate phosphohydrolase 1
O14672	ADAM10	439	1000	R.N#ISQVLEK.K	22.42	21.36	21.89	0.749533	0.66	3.521	Peptidase M12B	220-456	ADA10_HUMAN Disintegrin and metalloproteinase domain-containing protein 10
O14786	NRP1	150	1000	K.RGPECSQN#YTTPSGVIK.S	5.21	6.38	5.79	0.827315	1.14	2.784	CUB 2	147-265	NRP1_HUMAN Neuropilin-1
O14786	NRP1	522	24.437	K.IGYSNN#GSDWK.M	5.11	4.65	4.88	0.325269	0.76	3.196	F5/8 type C2	431-583	NRP1_HUMAN Neuropilin-1
O15031	PLXNB2	127	1000	R.ALSN#ISLR.L	22.5	19.55	21.02	2.08597	-0.1	2.429	Sema	20-466	PLXB2_HUMAN Plexin-B2
O15031	PLXNB2	528	1000	K.SCVAVTSAQPQN#MSR.R	104.5	105.03	104.76	0.374767	-0.17	2.105			PLXB2_HUMAN Plexin-B2
O15031	PLXNB2	733	1000	K.LSHDAN#ETLPLHLYVK.S	10.7	12.57	11.63	1.32229	-1.12	5.692			PLXB2_HUMAN Plexin-B2
O15031	PLXNB2	844	1000	R.N#CSFQPER.Y	21.23	N/A	21.23	N/A	-0.89	2.461	IPT/TIG 1	803-893	PLXB2_HUMAN Plexin-B2
O15031	PLXNB2	1049	1000	R.EAESLQPM*TVVGTDYVFHN#DTK.V	11.29	9.19	10.24	1.48492	2.04	4.091	IPT/TIG 3	983-1092	PLXB2_HUMAN Plexin-B2
O15230	LAMA5	2196	1000	R.GIN#ASSMAWAR.L	10.98	10.45	10.72	0.374767	5.01	3.098			LAMA5_HUMAN Laminin subunit alpha-5
O15230	LAMA5	2423	1000	R.KQELSRDN#ATLQATLHAAR.D	N/A	32.23	32.23	N/A	0.97	3.856			LAMA5_HUMAN Laminin subunit alpha-5
O15230	LAMA5	3107	1000	K.RLN#TTGVSAGCTADLLVGR.A	24.32	17.94	21.13	4.51134	2.33	3.989	Laminin G-like 2	2941-3115	LAMA5_HUMAN Laminin subunit alpha-5
O15393	TMPRSS2	213	22.492	K.LN#TSAGNVDIYKK.L	11.9	N/A	11.9	N/A	4.03	1.952	SRCR	150-242	TMPS2_HUMAN Transmembrane protease serine 2
O15394	NCAM2	219	1000	K.SFN#ATAERGEEMTFSCR.A	115.46	>200	157.73	N/A	-0.54	4.045	Ig-like C2-type 3	208-297	NCAM2_HUMAN Neural cell adhesion molecule 2
O15394	NCAM2	474	39.663	R.YN#CTATNHIGTR.F	N/A	>200	>200	N/A	-1.05	2.86	Ig-like C2-type 5	401-491	NCAM2_HUMAN Neural cell adhesion molecule 2
O15394	NCAM2	562	18.805	R.SHGVQTM*VVLNNLEPN#TTYEIR.V	82.15	113.18	97.66	21.9415	4.97	5.084	Fibronectin type-III 1	498-591	NCAM2_HUMAN Neural cell adhesion molecule 2
O43157	PLXNB1	1253	1000	K.YTLDPN#ITSAGPTK.S	19.91	13.34	16.62	4.64569	1.88	1.828	IPT/TIG 3	1252-1375	PLXB1_HUMAN Plexin-B1
O43194	GPR39	192	1000	R.GLTCN#R.S	40.55	N/A	40.55	N/A	-0.26	1.934			GPR39_HUMAN G-protein coupled receptor 39
O43688	PPAP2C	139	1000	R.VN#CSVYVQLEK.V	N/A	48.15	48.15	N/A	1.16	2.566			LPP2_HUMAN Lipid phosphate phosphohydrolase 2
O60487	MPZL2	39	1000	R.VLEAVN#GTDAR.L	14.1	12.45	13.28	1.16673	-0.15	4.38	Ig-like V-type	27-141	MPZL2_HUMAN Myelin protein zero-like protein 2
O60603	TLR2	414	73.311	K.N#LTNIDISK.N	14.92	N/A	14.92	N/A	4.33	2.972			TLR2_HUMAN Toll-like receptor 2
O60637	TSPAN3	127	37.54	K.TYN#GTNPDAASR.A	10.82	11.02	10.92	0.141421	-0.81	2.461			TSN3_HUMAN Tetraspanin-3
O60814	HIST1H2BK	64	20.167	K.AMGIMN#SFVNDIFER.I	N/A	>200	>200	N/A	-0.06	2.238			H2B1K_HUMAN Histone H2B type 1-K
O60896	RAMP3	103	1000	R.QFFSN#CTVDR.V	18.74	17.05	17.9	1.19501	-1.2	3.09			RAMP3_HUMAN Receptor activity-modifying protein 3
O75054	IGSF3	101	1000	R.VQGN#STLLHITDLQAR.D	>200	>200	>200	N/A	4.03	3.094	Ig-like C2-type 1	20-138	IGSF3_HUMAN Immunoglobulin superfamily member 3
O75054	IGSF3	655	24.437	K.NYN#NTWTR.L	109.5	N/A	109.5	N/A	-0.53	2.341	Ig-like C2-type 5	545-661	IGSF3_HUMAN Immunoglobulin superfamily member 3
O75054	IGSF3	700	52.725	K.RTLTLVENKPIQLN#CSVK.S	23.93	N/A	23.93	N/A	-1.11	6.579	Ig-like C2-type 6	676-803	IGSF3_HUMAN Immunoglobulin superfamily member 3
O75054	IGSF3	825	1000	R.LSQAQGN#LSVLETR.Q	12.2	15.32	13.76	2.20617	2.53	1.919	Ig-like C2-type 7	813-945	IGSF3_HUMAN Immunoglobulin superfamily member 3
O75054	IGSF3	842	1000	R.QVQLECVVLN#R.T	12.32	9.91	11.12	1.70413	0.21	3.477	Ig-like C2-type 7	813-945	IGSF3_HUMAN Immunoglobulin superfamily member 3
O75054	IGSF3	961	1000	K.RAEDTAGQTALTVMRPDASLQVDTVVPN#ATVSEK.A	N/A	12.51	12.51	N/A	-0.11	2.19	Ig-like C2-type 6	949-1097	IGSF3_HUMAN Immunoglobulin superfamily member 3
O75144	ICOSLG	70	22.492	K.TVVTYHIPQN#SSLENVDSR.Y	>200	>200	>200	N/A	4.39	3.87	Ig-like V-type	19-129	ICOSL_HUMAN ICOS ligand
O75144	ICOSLG	102	1000	R.LFN#VTPQDEQK.F	16.47	16.37	16.42	0.0707107	3.41	2.412	Ig-like V-type	19-129	ICOSL_HUMAN ICOS ligand
O75882	ATRN	1073	1000	K.CIN#QSICEK.C	25.28	N/A	25.28	N/A	-1.3	1.991	Laminin EGF-like 1	1063-1108	ATRN_HUMAN Attractin
O75882	ATRN	1082	1000	K.CEN#LTTGK.H	55.72	51.73	53.72	2.82136	-2.24	2.131	Laminin EGF-like 1	1063-1108	ATRN_HUMAN Attractin
O75954	TSPAN9	180	1000	R.N#ATTPLWR.T	N/A	23.66	23.66	N/A	-0.21	2.189			TSN9_HUMAN Tetraspanin-9
O76082	SLC22A5	57	1000	R.CRVPDAAN#LSSAWR.N	47	35.77	41.39	7.94081	0.01	4.61			S22A5_HUMAN Solute carrier family 22 member 5
O76082	SLC22A5	91	1000	R.LATIAN#FSALGLEPGR.D	32.61	N/A	32.61	N/A	2.93	4.507			S22A5_HUMAN Solute carrier family 22 member 5
O94805	ACTL6B	159	1000	K.TAVLTAFAN#GR.S	>200	N/A	>200	N/A	-1.78	2.845			ACL6B_HUMAN Actin-like protein 6B
O95084	PRSS23	207	1000	R.GAN#DSTSAMPEQMK.F	19.51	17	18.26	1.77484	-0.97	1.9			PRS23_HUMAN Serine protease 23
O95136	S1PR2	19	1000	K.VQEHYN#YTK.E	28.67	29.24	28.95	0.403051	-2	3.323			S1PR2_HUMAN Sphingosine 1-phosphate receptor 2
O95196	CSPG5	355	1000	R.DLASSEN#GTECR.S	N/A	19.88	19.88	N/A	-0.3	2.145			CSPG5_HUMAN Chondroitin sulfate proteoglycan 5
O95274	LYPD3	118	1000	K.LN#LTSR.A	N/A	5.91	5.91	N/A	-0.37	2.029	UPAR/Ly6 1	33-126	LYPD3_HUMAN Ly6/PLAUR domain-containing protein 3
O95274	LYPD3	163	1000	R.EACQGTSPPVVSCYN#ASDHVYK.G	4.97	4.33	4.65	0.452548	-0.18	3.164	UPAR/Ly6 2	140-222	LYPD3_HUMAN Ly6/PLAUR domain-containing protein 3
O95274	LYPD3	227	39.663	R.CNSDLRN#K.T	5.05	5.23	5.14	0.127279	0.37	2.187			LYPD3_HUMAN Ly6/PLAUR domain-containing protein 3
O95297	MPZL1	50	1000	K.EIFVAN#GTQGK.L	5.36	5.92	5.64	0.39598	3.3	3.682	Ig-like V-type	36-146	MPZL1_HUMAN Myelin protein zero-like protein 1
O95857	TSPAN13	137	17.009	R.SVNPN#DTCLASCVK.S	N/A	9.53	9.53	N/A	-0.1	3.365			TSN13_HUMAN Tetraspanin-13
O95858	TSPAN15	189	71.753	R.N#TTEVVNTMCGYK.T	16.32	7.97	12.14	5.90434	0.99	3.541			TSN15_HUMAN Tetraspanin-15
P01892	HLA-A	110	1000	R.GYYN#QSEAGSHTVQR.M	25.61	18.24	21.93	5.21138	-0.33	3.782			1A02_HUMAN HLA class I histocompatibility antigen, A-2 alpha chain
P02786	TFRC	251	1000	K.DFEDLYTPVN#GSIVIVR.A	N/A	17.23	17.23	N/A	1.09	1.579	PA	223-313	TFR1_HUMAN Transferrin receptor protein 1
P02786	TFRC	727	84.609	R.KQNNGAFN#ETLFR.N	14.46	14.9	14.68	0.311127	1.25	5.659			TFR1_HUMAN Transferrin receptor protein 1
P04156	PRNP	197	1000	K.QHTVTTTTKGEN#FTETDVK.M	13.7	13.87	13.79	0.120208	6.35	2.63			PRIO_HUMAN Major prion protein
P04406	GAPDH	9	1000	K.VGVN#GFGR.I	>200	>200	>200	N/A	0.87	2.754			G3P_HUMAN Glyceraldehyde-3-phosphate dehydrogenase
P04406	GAPDH	225	1000	K.VIPELN#GK.L	>200	>200	>200	N/A	0.87	2.563			G3P_HUMAN Glyceraldehyde-3-phosphate dehydrogenase
P04626	ERBB2	530	1000	R.GHCWGPGPTQCVN#CSQFLR.G	>200	>200	>200	N/A	-0.07	5.521			ERBB2_HUMAN Receptor tyrosine-protein kinase erbB-2
P05026	ATP1B1	158	71.949	R.FKLEWLGN#CSGLNDETYGYK.E	19.58	N/A	19.58	N/A	-0.12	6.447			AT1B1_HUMAN Sodium/potassium-transporting ATPase subunit beta-1
P05026	ATP1B1	193	1000	R.VLGFKPKPPKN#ESLETYPVM*K.Y	23.52	18.5	21.01	3.54968	0.39	3.694			AT1B1_HUMAN Sodium/potassium-transporting ATPase subunit beta-1
P05026	ATP1B1	265	1000	K.YLQPLLAVQFTN#LTM*DTEIR.I	N/A	11	11	N/A	-1.81	1.941			AT1B1_HUMAN Sodium/potassium-transporting ATPase subunit beta-1
P05362	ICAM1	145	1000	R.AN#LTVVLLR.G	17.8	19.59	18.7	1.26572	0.95	2.677	Ig-like C2-type 2	128-193	ICAM1_HUMAN Intercellular adhesion molecule 1
P05362	ICAM1	267	78.156	R.LNPTVTYGN#DSFSAK.A	N/A	40.9	40.9	N/A	4.86	3.526	Ig-like C2-type 3	230-297	ICAM1_HUMAN Intercellular adhesion molecule 1
P05556	ITGB1	212	67.169	K.LRNPCTSEQN#CTSPFSYK.N	20.4	24.46	22.43	2.87085	0.64	5.07	VWFA	140-378	ITB1_HUMAN Integrin beta-1
P05556	ITGB1	406	73.311	K.NGVN#GTGENGR.K	16.85	13.95	15.4	2.05061	-0.07	4.846			ITB1_HUMAN Integrin beta-1
P05556	ITGB1	481	1000	K.CHEGN#GTFECGACR.C	20.83	27.76	24.3	4.90025	-0.44	2.258			ITB1_HUMAN Integrin beta-1
P05556	ITGB1	520	107.317	R.KEN#SSEICSNNGECVCGQCVCR.K	74.77	61.03	67.9	9.71565	8.68	4.45			ITB1_HUMAN Integrin beta-1
P05556	ITGB1	669	1000	K.KDTCTQECSYFN#ITKVESR.D	134.97	N/A	134.97	N/A	4.71	4.761			ITB1_HUMAN Integrin beta-1
P06213	INSR	920	1000	R.GLSPGN#YSVR.I	16.05	23.14	19.6	5.01339	7.37	3.279	Fibronectin type-III 3	853-947	INSR_HUMAN Insulin receptor
P06280	GLA	215	1000	R.SIVYSCEWPLYM*WPFQKPN#YTEIR.Q	N/A	>200	>200	N/A	-0.56	2.229			AGAL_HUMAN Alpha-galactosidase A
P06731	CEACAM5	152	13.38	R.VYPELPKPSISSN#NSKPVEDK.D	14.7	12.7	13.7	1.41421	-0.84	3.657	Ig-like 1	35-144	CEAM5_HUMAN Carcinoembryonic antigen-related cell adhesion molecule 5
P06731	CEACAM5	204	1000	R.TLTLFN#VTR.N	17.94	17.72	17.83	0.155563	0.34	4.171	Ig-like 2	146-237	CEAM5_HUMAN Carcinoembryonic antigen-related cell adhesion molecule 5
P06731	CEACAM5	246	75.739	R.RSDSVILNVLYGPDAPTISPLN#TSYR.S	N/A	109	109	N/A	6.66	5.042	Ig-like 3	238-322	CEAM5_HUMAN Carcinoembryonic antigen-related cell adhesion molecule 5
P06731	CEACAM5	375	48.874	R.LQLSNDN#R.T	>200	>200	>200	N/A	-0.45	3.451	Ig-like 4	325-415	CEAM5_HUMAN Carcinoembryonic antigen-related cell adhesion molecule 5
P06731	CEACAM5	508	27.055	K.TITVSAELPKPSISSN#NSKPVEDK.D	18.02	20.44	19.23	1.7112	7.27	7.008	Ig-like 6	502-593	CEAM5_HUMAN Carcinoembryonic antigen-related cell adhesion molecule 5
P06731	CEACAM5	665	24.437	R.N#NSIVK.S	N/A	22.65	22.65	N/A	-0.65	2.48	Ig-like 7	594-677	CEAM5_HUMAN Carcinoembryonic antigen-related cell adhesion molecule 5
P06756	ITGAV	74	1000	K.AN#TTQPGIVEGGQVLK.C	10.19	12.22	11.21	1.43543	0.39	2.69			ITAV_HUMAN Integrin alpha-V
P06756	ITGAV	554	1000	K.N#MTISR.G	15.48	10.62	13.05	3.43654	-0.26	1.986			ITAV_HUMAN Integrin alpha-V
P06756	ITGAV	704	1000	R.LSCAFKTEN#QTR.Q	21.09	27.08	24.09	4.23557	-0.53	2.844			ITAV_HUMAN Integrin alpha-V
P06756	ITGAV	874	1000	K.ISSLQTTEKN#DTVAGQGERDHLITK.R	N/A	14.2	14.2	N/A	-0.09	6.303			ITAV_HUMAN Integrin alpha-V
P07339	CTSD	263	1000	K.GSLSYLN#VTRK.A	>200	N/A	>200	N/A	-7.28	3.467	Peptidase A1	79-407	CATD_HUMAN_contaminant Cathepsin D
P07602	PSAP	101	1000	K.TCDWLPKPN#MSASCK.E	11.9	N/A	11.9	N/A	-1.57	2.393	Saposin B-type 1	59-142	SAP_HUMAN Prosaposin
P08069	IGF1R	244	66.977	K.RACTENNECCHPECLGSCSAPDN#DTACVACR.H	N/A	>200	>200	N/A	-0.34	7.519			IGF1R_HUMAN Insulin-like growth factor 1 receptor
P08069	IGF1R	747	1000	R.DVM*QVAN#TTMSSR.S	9.94	N/A	9.94	N/A	4.74	2.325	Fibronectin type-III 3	735-828	IGF1R_HUMAN Insulin-like growth factor 1 receptor
P08069	IGF1R	900	53.534	R.LNPGN#YTAR.I	12.97	16.28	14.63	2.34052	0.07	2.978	Fibronectin type-III 4	834-927	IGF1R_HUMAN Insulin-like growth factor 1 receptor
P08069	IGF1R	913	1000	R.IQATSLSGN#GSWTDPVFFYVQAK.T	15.47	18.62	17.04	2.22739	5.67	2.218	Fibronectin type-III 4	834-927	IGF1R_HUMAN Insulin-like growth factor 1 receptor
P08174	CD55	95	1000	K.GSQWSDIEEFCN#R.S	>200	>200	>200	N/A	1.58	3.989	Sushi 1	35-96	DAF_HUMAN Complement decay-accelerating factor
P08195	SLC3A2	365	1000	K.DASSFLAEWQN#ITK.G	25.17	25.52	25.35	0.247487	0.72	2.667			4F2_HUMAN 4F2 cell-surface antigen heavy chain
P08195	SLC3A2	381	128.035	K.GFSEDRLLIAGTN#SSDLQQILSLLESNK.D	22.71	23.37	23.04	0.46669	-0.58	6.423			4F2_HUMAN 4F2 cell-surface antigen heavy chain
P08195	SLC3A2	424	44.278	K.SLVTQYLN#ATGNR.W	35.24	24.58	29.91	7.53776	-0.16	3.58			4F2_HUMAN 4F2 cell-surface antigen heavy chain
P08473	MME	145	1000	R.SCIN#ESAIDSR.G	94.42	90.72	92.57	2.6163	1.15	2.095			NEP_HUMAN Neprilysin
P08473	MME	285	38.178	K.EIAN#ATAKPEDRNDPMLLYNK.M	N/A	45.48	45.48	N/A	1.5	3.705			NEP_HUMAN Neprilysin
P08648	ITGA5	593	1000	K.IYLRN#ESEFRDK.L	20.01	15.4	17.71	3.25976	1.74	3.964			ITA5_HUMAN Integrin alpha-5
P08648	ITGA5	773	24.437	K.NLN#NSQSDVVSFR.L	19.7	22.42	21.06	1.92333	3.55	3.183			ITA5_HUMAN Integrin alpha-5
P08648	ITGA5	868	27.121	R.VTGLN#CTTNHPINPK.G	85.28	51.83	68.56	23.6527	-7.51	3.319			ITA5_HUMAN Integrin alpha-5
P09758	TACSTD2	120	70.908	K.ARQCN#QTSVCWCVNSVGVR.R	16.37	30.27	23.32	9.82878	0.02	2.909	Thyroglublin type-1	70-145	TACD2_HUMAN Tumor-associated calcium signal transducer 2
P09758	TACSTD2	168	1000	R.HRPTAGAFN#HSDLDAELR.R	11.02	16.59	13.8	3.93858	-0.07	2.56			TACD2_HUMAN Tumor-associated calcium signal transducer 2
P09758	TACSTD2	208	1000	K.FVAAVHYEQPTIQIELRQN#TSQK.A	6.23	5.9	6.06	0.233345	0.09	2.805			TACD2_HUMAN Tumor-associated calcium signal transducer 2
P10586	PTPRF	966	64.398	R.DINSQQELQN#ITTDTR.F	7.18	5.55	6.37	1.15258	3.21	3.248	Fibronectin type-III 7	918-1010	PTPRF_HUMAN Receptor-type tyrosine-protein phosphatase F
P10909	CLU	86	1000	K.KKEDALN#ETRESETK.L	5.57	N/A	5.57	N/A	-0.98	1.687			CLUS_HUMAN Clusterin
P10909	CLU	291	1000	R.EIRHN#STGCLR.M	13.54	11.79	12.66	1.23744	-0.41	2.335			CLUS_HUMAN Clusterin
P11047	LAMC1	1022	25.174	R.EGFVGNRCDQCEENYFYN#R.S	N/A	9.72	9.72	N/A	-1.05	2.972	Laminin EGF-like 11	983-1030	LAMC1_HUMAN Laminin subunit gamma-1
P11047	LAMC1	1107	24.437	R.VN#NTLSSQISR.L	4.88	5.85	5.37	0.685894	-0.25	3.101			LAMC1_HUMAN Laminin subunit gamma-1
P11047	LAMC1	1380	44.278	R.RVNDN#K.T	8.01	N/A	8.01	N/A	-0.1	2.963			LAMC1_HUMAN Laminin subunit gamma-1
P11047	LAMC1	1395	29.667	R.KIPAIN#QTITEANEK.T	N/A	9.04	9.04	N/A	0.22	3.782			LAMC1_HUMAN Laminin subunit gamma-1
P11047	LAMC1	1439	1000	K.N#ATSTK.A	3.84	3.56	3.7	0.19799	0.3	2.56			LAMC1_HUMAN Laminin subunit gamma-1
P11166	SLC2A1	45	1000	K.VIEEFYN#QTWVHR.Y	15.74	14.86	15.3	0.622254	-1.76	3.698			GTR1_HUMAN Solute carrier family 2, facilitated glucose transporter member 1
P11279	LAMP1	84	1000	R.SSCGKEN#TSDPSLVIAFGR.G	>200	>200	>200	N/A	4.24	3.122			LAMP1_HUMAN Lysosome-associated membrane glycoprotein 1
P11279	LAMP1	103	1000	R.GHTLTLN#FTR.N	>200	>200	>200	N/A	6.17	4.122			LAMP1_HUMAN Lysosome-associated membrane glycoprotein 1
P11279	LAMP1	249	1000	R.KDN#TTVTR.L	28.19	34.41	31.3	4.3982	-0.36	2.096			LAMP1_HUMAN Lysosome-associated membrane glycoprotein 1
P11279	LAMP1	307	1000	R.FFLQGIQLN#TILPDARDPAFK.A	N/A	20.16	20.16	N/A	-0.76	5.366			LAMP1_HUMAN Lysosome-associated membrane glycoprotein 1
P11362	FGFR1	317	1000	K.TAGVN#TTDK.E	5.47	N/A	5.47	N/A	-0.05	1.53	Ig-like C2-type 3	255-357	FGFR1_HUMAN Fibroblast growth factor receptor 1
P11717	IGF2R	2085	1000	K.GYPCGGN#K.T	14.86	13.4	14.13	1.03238	-1.19	1.675			MPRI_HUMAN Cation-independent mannose-6-phosphate receptor
P12821	ACE	146	97.596	K.RQQYNALLSN#MSR.I	>200	>200	>200	N/A	-2.07	6.046			ACE_HUMAN Angiotensin-converting enzyme
P12821	ACE	695	39.663	K.NMQIAN#HTLK.Y	>200	>200	>200	N/A	-7.84	2.8			ACE_HUMAN Angiotensin-converting enzyme
P13473	LAMP2	49	1000	K.WQM*N#FTVR.Y	N/A	>200	>200	N/A	-1.58	2.248			LAMP2_HUMAN Lysosome-associated membrane glycoprotein 2
P13473	LAMP2	58	1000	R.YETTN#K.T	>200	>200	>200	N/A	-0.54	2.116			LAMP2_HUMAN Lysosome-associated membrane glycoprotein 2
P13473	LAMP2	101	1000	K.IAVQFGPGFSWIAN#FTK.A	N/A	>200	>200	N/A	-0.51	3.498			LAMP2_HUMAN Lysosome-associated membrane glycoprotein 2
P13473	LAMP2	275	1000	R.LN#SSTIK.Y	22.12	18.91	20.52	2.26981	-0.04	2.856			LAMP2_HUMAN Lysosome-associated membrane glycoprotein 2
P13473	LAMP2	356	1000	R.VQPFN#VTQGK.Y	>200	>200	>200	N/A	-0.26	2.193			LAMP2_HUMAN Lysosome-associated membrane glycoprotein 2
P13987	CD59	43	1000	K.TAVN#CSSDFDACLITK.A	N/A	15.28	15.28	N/A	-0.22	1.708	UPAR/Ly6	26-108	CD59_HUMAN CD59 glycoprotein
P15151	PVR	105	1000	R.LGAELRN#ASLR.M	58.65	N/A	58.65	N/A	2.42	2.456	Ig-like V-type	24-139	PVR_HUMAN Poliovirus receptor
P15260	IFNGR1	179	1000	R.MN#GSEIQYK.I	3.75	3.35	3.55	0.282843	4.66	2.612			INGR1_HUMAN Interferon gamma receptor 1
P16070	CD44	57	1000	K.AFN#STLPTM*AQMEK.A	11.29	N/A	11.29	N/A	6.9	2.535	Link	32-120	CD44_HUMAN CD44 antigen
P16144	ITGB4	695	1000	R.CSFRDEDDDCTYSYTMEGDGAPGPN#STVLVHK.K	19.9	21.76	20.83	1.31522	7.35	3.042			ITB4_HUMAN Integrin beta-4
P16422	EPCAM	74	1000	K.AEMN#GSK.L	22.87	N/A	22.87	N/A	-0.01	2.116	Thyroglublin type-1	63-135	EPCAM_HUMAN Epithelial cell adhesion molecule
P16422	EPCAM	111	53.71	K.QCN#GTSMCWCVNTAGVR.R	9.93	12.51	11.22	1.82434	1.09	2.588	Thyroglublin type-1	63-135	EPCAM_HUMAN Epithelial cell adhesion molecule
P17181	IFNAR1	81	1000	K.LSGCQN#ITSTK.C	3.83	N/A	3.83	N/A	-0.21	2.264	Fibronectin type-III 1	32-126	INAR1_HUMAN Interferon alpha/beta receptor 1
P17181	IFNAR1	172	1000	K.N#SSGVEER.I	17.06	10	13.53	4.99217	0.01	2.412	Fibronectin type-III 2	127-227	INAR1_HUMAN Interferon alpha/beta receptor 1
P17301	ITGA2	105	65.263	K.LNLQTSTSIPN#VTEM*K.T	27.93	N/A	27.93	N/A	-2.28	2.647			ITA2_HUMAN Integrin alpha-2
P17301	ITGA2	343	1000	R.YFFN#VSDEAALLEK.A	21.11	18.43	19.77	1.89505	7.46	3.52	VWFA	188-365	ITA2_HUMAN Integrin alpha-2
P17301	ITGA2	1057	1000	R.TASCSN#VTCWLK.D	43.93	N/A	43.93	N/A	-1.54	2.497			ITA2_HUMAN Integrin alpha-2
P17301	ITGA2	1074	1000	K.GEYFVN#VTTR.I	N/A	28.37	28.37	N/A	0.48	1.877			ITA2_HUMAN Integrin alpha-2
P18564	ITGB6	463	1000	K.EVEVN#SSK.C	9.93	N/A	9.93	N/A	-0.61	1.73			ITB6_HUMAN Integrin beta-6
P19256	CD58	169	1000	R.N#STSIYFK.M	21.71	15.96	18.83	4.06586	-0.06	4			LFA3_HUMAN Lymphocyte function-associated antigen 3
P20645	M6PR	57	1000	K.RLKPLFN#K.S	>200	>200	>200	N/A	4.6	3.507			MPRD_HUMAN Cation-dependent mannose-6-phosphate receptor
P20645	M6PR	83	106.4	R.EAGN#HTSGAGLVQINK.S	66.23	57.97	62.1	5.8407	-8.67	4.574			MPRD_HUMAN Cation-dependent mannose-6-phosphate receptor
P21589	NT5E	53	1000	K.CVN#ASR.C	28.43	N/A	28.43	N/A	-0.69	1.815			5NTD_HUMAN 5'-nucleotidase
P21589	NT5E	333	1000	K.LDN#YSTQELGK.T	23.76	21.86	22.81	1.3435	-0.32	2.072			5NTD_HUMAN 5'-nucleotidase
P21860	ERBB3	437	48.874	K.NLN#VTSLGFR.S	7.08	7.27	7.18	0.13435	-0.69	4.152			ERBB3_HUMAN Receptor tyrosine-protein kinase erbB-3
P21860	ERBB3	522	1000	K.VCDPLCSSGGCWGPGPGQCLSCRN#YSR.G	4.26	4.49	4.37	0.162635	0.31	2.035			ERBB3_HUMAN Receptor tyrosine-protein kinase erbB-3
P21926	CD9	151	1000	K.AIHYALN#CCGLAGGVEQFISDICPK.K	N/A	61.73	61.73	N/A	-0.55	4.689			CD9_HUMAN CD9 antigen
P22223	CDH3	566	1000	R.QVLN#ITDK.D	2.97	3.02	2.99	0.0353553	3.48	3.474	Cadherin 5	547-650	CADH3_HUMAN Cadherin-3
P22413	ENPP1	285	1000	K.MN#ASFSLK.S	25.21	20.08	22.64	3.62746	5.66	3.149			ENPP1_HUMAN Ectonucleotide pyrophosphatase/phosphodiesterase family member 1
P22413	ENPP1	341	1000	K.MYN#GSVPFEER.I	47	48.31	47.65	0.92631	3.1	3.054			ENPP1_HUMAN Ectonucleotide pyrophosphatase/phosphodiesterase family member 1
P22413	ENPP1	477	16.265	R.N#LSCREPNQHFKPYLK.H	16.88	17.59	17.23	0.502046	9.54	4.137			ENPP1_HUMAN Ectonucleotide pyrophosphatase/phosphodiesterase family member 1
P23229	ITGA6	966	47.045	R.KYQTLN#CSVNVNCVNIR.C	>200	N/A	>200	N/A	3.98	2.426			ITA6_HUMAN Integrin alpha-6
P25445	FAS	118	1000	R.LCDEGHGLEVEIN#CTR.T	N/A	>200	>200	N/A	-1.03	2.958			TNR6_HUMAN Tumor necrosis factor receptor superfamily member 6
P25445	FAS	136	36.701	R.CKPNFFCN#STVCEHCDPCTK.C	45.16	32.61	38.88	8.87419	0.7	4.539			TNR6_HUMAN Tumor necrosis factor receptor superfamily member 6
P26006	ITGA3	107	1000	R.MN#ITVK.N	N/A	73.02	73.02	N/A	-0.75	2.163			ITA3_HUMAN Integrin alpha-3
P26006	ITGA3	265	1000	K.N#ITIVTGAPR.H	36.06	41.69	38.87	3.98101	0.17	3.919			ITA3_HUMAN Integrin alpha-3
P26006	ITGA3	511	1000	R.RN#ITLAYTLEADRDR.R	81.11	84.31	82.71	2.26274	-1.89	4.517			ITA3_HUMAN Integrin alpha-3
P26006	ITGA3	656	24.243	K.LLLSIN#VTNTR.T	N/A	17.09	17.09	N/A	-0.28	2.644			ITA3_HUMAN Integrin alpha-3
P26006	ITGA3	969	37.54	R.TSIPTINMEN#K.T	27.53	27.48	27.51	0.0353553	-0.07	2.925			ITA3_HUMAN Integrin alpha-3
P26012	ITGB8	466	50.805	R.N#CSCQCEDNRGPK.G	6.99	7.12	7.05	0.0919239	-0.37	2.167			ITB8_HUMAN Integrin beta-8
P27701	CD82	198	1000	K.GFCEAPGN#R.T	>200	N/A	>200	N/A	-0.68	2.143			CD82_HUMAN CD82 antigen
P29323	EPHB2	482	1000	K.ELSEYN#ATAIK.S	20.83	19.04	19.93	1.26572	0.47	3.095	Fibronectin type-III 2	435-530	EPHB2_HUMAN Ephrin type-B receptor 2
P30464	HLA-B	110	1000	R.GYYN#QSEAGSHTLQR.M	11.61	7.42	9.52	2.96278	-0.14	4.056			1B15_HUMAN HLA class I histocompatibility antigen, B-15 alpha chain
P30825	SLC7A1	226	142.629	K.NWQLTEEDFGN#TSGR.L	22.91	14.73	18.82	5.78413	0.36	3.668			CTR1_HUMAN High affinity cationic amino acid transporter 1
P30825	SLC7A1	235	24.437	R.LCLNN#DTK.E	14.43	11.28	12.85	2.22739	9.7	2.979			CTR1_HUMAN High affinity cationic amino acid transporter 1
P30988	CALCR	91	1000	R.MQQLPAYQGEGPYCN#R.T	>200	>200	>200	N/A	0.15	2.381			CALCR_HUMAN Calcitonin receptor
P32004	L1CAM	294	20.167	R.VTYQNHN#K.T	10.46	12.31	11.38	1.30815	-0.12	1.585	Ig-like C2-type 3	240-328	L1CAM_HUMAN Neural cell adhesion molecule L1
P32004	L1CAM	671	1000	K.VPGN#QTSTTLK.L	11.29	15.57	13.43	3.02642	2.8	2.333	Fibronectin type-III 1	615-712	L1CAM_HUMAN Neural cell adhesion molecule L1
P32004	L1CAM	849	1000	R.GYN#VTYWR.E	13.28	18.18	15.73	3.46482	1.3	3.412	Fibronectin type-III 3	814-916	L1CAM_HUMAN Neural cell adhesion molecule L1
P35052	GPC1	116	1000	R.SFDDHFQHLLN#DSER.T	28.39	32.71	30.55	3.0547	5.22	4.966			GPC1_HUMAN Glypican-1
P35613	BSG	160	1000	K.ILLTCSLN#DSATEVTGHR.W	N/A	>200	>200	N/A	-0.88	4.628	Ig-like C2-type	138-219	BASI_HUMAN Basigin
P35613	BSG	268	1000	K.ALM*N#GSESR.F	13.95	12.42	13.18	1.08187	-0.32	2.171	Ig-like V-type	221-315	BASI_HUMAN Basigin
P35613	BSG	302	1000	R.CN#GTSSK.G	17.7	13.43	15.56	3.01935	-0.34	2.442	Ig-like V-type	221-315	BASI_HUMAN Basigin
P36941	LTBR	177	1000	K.AGHFQN#TSSPSAR.C	>200	N/A	>200	N/A	-7.83	1.642			TNR3_HUMAN Tumor necrosis factor receptor superfamily member 3
P40189	IL6ST	83	1000	K.EQYTIIN#R.T	15.88	21.83	18.86	4.20729	3.47	2.142	Ig-like C2-type	26-120	IL6RB_HUMAN Interleukin-6 receptor subunit beta
P40189	IL6ST	131	104.477	K.N#LSCIVNEGK.K	7.16	7.66	7.41	0.353553	-3.76	2.57	Fibronectin type-III 1	125-216	IL6RB_HUMAN Interleukin-6 receptor subunit beta
P42892	ECE1	166	1000	K.HLLEN#STASVSEAERK.A	16.24	23.77	20	5.32451	8.61	5.33			ECE1_HUMAN Endothelin-converting enzyme 1
P42892	ECE1	187	1000	R.ACM*N#ETRIEELR.A	35.79	29.61	32.7	4.36992	8.35	2.74			ECE1_HUMAN Endothelin-converting enzyme 1
P42892	ECE1	210	1000	R.LGGWN#ITGPWAK.D	N/A	17.2	17.2	N/A	-1.71	2.138			ECE1_HUMAN Endothelin-converting enzyme 1
P42892	ECE1	249	17.009	K.NSN#SNVIQVDQSGLGLPSR.D	13.92	N/A	13.92	N/A	-2.84	3.125			ECE1_HUMAN Endothelin-converting enzyme 1
P42892	ECE1	270	1000	R.DYYLN#K.T	N/A	17.26	17.26	N/A	-0.96	1.801			ECE1_HUMAN Endothelin-converting enzyme 1
P42892	ECE1	539	1000	R.FFN#FSWR.V	11.5	12.62	12.06	0.79196	3.61	3.602			ECE1_HUMAN Endothelin-converting enzyme 1
P42892	ECE1	632	1000	K.N#SSVEAFKR.Q	N/A	7.67	7.67	N/A	-0.5	2.522			ECE1_HUMAN Endothelin-converting enzyme 1
P42892	ECE1	651	40.362	K.RQTECMVEQYSN#YSVNGEPVNGR.H	N/A	107.97	107.97	N/A	-0.44	5.96			ECE1_HUMAN Endothelin-converting enzyme 1
P48960	CD97	108	38.371	K.TFKN#ESENTCQDVDECQQNPR.L	22.32	N/A	22.32	N/A	-8.25	4.643	EGF-like 2 calcium-binding	64-115	CD97_HUMAN CD97 antigen
P48960	CD97	371	1000	R.GDKN#VTMGQSSAR.M	10.66	9.91	10.29	0.53033	0.1	3.164			CD97_HUMAN CD97 antigen
P50454	SERPINH1	120	1000	R.SLSN#STAR.N	17.1	17.86	17.48	0.537401	-0.55	2.543			SERPH_HUMAN Serpin H1
P50895	BCAM	439	1000	R.TQN#FTLLVQGSPELK.T	8.42	6.66	7.54	1.24451	-1.17	2.882	Ig-like C2-type 2	363-411	BCAM_HUMAN Basal cell adhesion molecule
P51795	CLCN5	408	33.657	K.LCDYENRFN#TSK.G	56.57	48	52.29	6.05991	0.37	3.035			CLCN5_HUMAN H(+)/Cl(-) exchange transporter 5
P51805	PLXNA3	59	1000	K.LAPN#LTELR.A	>200	>200	>200	N/A	2.96	4.017	Sema	20-488	PLXA3_HUMAN Plexin-A3
P52569	SLC7A2	227	1000	K.N#ISASAR.E	6.49	5.5	6	0.700036	-4.29	2.773			CTR2_HUMAN Low affinity cationic amino acid transporter 2
P52797	EFNA3	100	1000	R.TCN#ASQGFKR.W	10.41	10.82	10.61	0.289914	-0.83	2.494	Ephrin RBD	30-169	EFNA3_HUMAN Ephrin-A3
P53801	PTTG1IP	54	78.156	K.N#VSCLWCNTNK.A	15.51	16.31	15.91	0.565685	1.51	2.687	PSI	39-92	PTTG_HUMAN Pituitary tumor-transforming gene 1 protein-interacting protein
P54709	ATP1B3	124	1000	K.FLKPYTLEEQKN#LTVCPDGALFEQK.G	110.81	107.61	109.21	2.26274	-3.07	5.567			AT1B3_HUMAN Sodium/potassium-transporting ATPase subunit beta-3
P55268	LAMB2	1249	1000	R.N#TSAASTAQLVEATEELRR.E	13.13	17.19	15.16	2.87085	2.14	4.868			LAMB2_HUMAN Laminin subunit beta-2
P55268	LAMB2	1348	119.274	R.RAN#TSALAVPSPVSNSASAR.H	N/A	>200	>200	N/A	-0.3	4.117			LAMB2_HUMAN Laminin subunit beta-2
P56159	GFRA1	59	1000	R.QCVAGKETN#FSLASGLEAKDECR.S	7.32	N/A	7.32	N/A	3.48	5.783			GFRA1_HUMAN GDNF family receptor alpha-1
P56159	GFRA1	152	24.437	K.GN#NCLDAAK.A	6.65	N/A	6.65	N/A	-1.05	2.992			GFRA1_HUMAN GDNF family receptor alpha-1
P56159	GFRA1	406	20.985	K.SN#VSGNTHLCISNGNYEK.E	8.4	N/A	8.4	N/A	-0.31	4.375			GFRA1_HUMAN GDNF family receptor alpha-1
P56749	CLDN12	47	1000	K.N#LTVYTGLWVK.C	N/A	13.72	13.72	N/A	4.88	3.425			CLD12_HUMAN Claudin-12
P78504	JAG1	217	20.167	R.DDFFGHYACDQNGN#K.T	N/A	5.59	5.59	N/A	-0.69	2.927	DSL	185-229	JAG1_HUMAN Protein jagged-1
P78536	ADAM17	103	1000	K.VVVVDGKN#ESEYTVK.W	7.53	N/A	7.53	N/A	-0.51	2.915			ADA17_HUMAN Disintegrin and metalloproteinase domain-containing protein 17
P78536	ADAM17	452	1000	K.MFSN#CSK.Q	30.68	19.94	25.31	7.59433	8	2.096	Peptidase M12B	223-474	ADA17_HUMAN Disintegrin and metalloproteinase domain-containing protein 17
P78536	ADAM17	539	1000	K.KCQEAIN#ATCK.G	>200	>200	>200	N/A	-0.89	2.631	Disintegrin	475-563	ADA17_HUMAN Disintegrin and metalloproteinase domain-containing protein 17
P78552	IL13RA1	157	13.378	R.NTSPDTN#YTLYYWHR.S	N/A	62.41	62.41	N/A	-1.57	1.901	Fibronectin type-III 2	128-226	I13R1_HUMAN Interleukin-13 receptor subunit alpha-1
P98160	HSPG2	89	1000	R.ALVN#FTR.S	>200	>200	>200	N/A	-0.18	2.385	SEA	80-191	PGBM_HUMAN Basement membrane-specific heparan sulfate proteoglycan core protein
Q02487	DSC2	392	1000	R.AN#YTILK.G	15.54	13.78	14.66	1.24451	-0.8	2.656	Cadherin 3	356-471	DSC2_HUMAN Desmocollin-2
Q02487	DSC2	629	1000	K.AIN#DTAAR.L	N/A	23.57	23.57	N/A	-0.97	2.678	Cadherin 5	580-694	DSC2_HUMAN Desmocollin-2
Q03405	PLAUR	194	1000	K.CCN#TTK.C	16.55	17.75	17.15	0.848528	-0.62	2.034	UPAR/Ly6 2	115-213	UPAR_HUMAN Urokinase plasminogen activator surface receptor
Q04721	NOTCH2	46	32.218	R.DGYEPCVNEGMCVTYHN#GTGYCK.C	32.02	N/A	32.02	N/A	3.06	4.005	EGF-like 1	26-63	NOTC2_HUMAN Neurogenic locus notch homolog protein 2
Q07954	LRP1	357	1000	R.CDMDGQN#R.T	13.27	N/A	13.27	N/A	-0.56	2.946			LRP1_HUMAN Prolow-density lipoprotein receptor-related protein 1
Q07954	LRP1	2521	1000	R.AVN#SSCR.A	25.7	24.33	25.02	0.968736	-0.28	2.303			LRP1_HUMAN Prolow-density lipoprotein receptor-related protein 1
Q07954	LRP1	3333	1000	R.TCVSN#CTASQFVCK.N	>200	N/A	>200	N/A	-0.47	1.829	LDL-receptor class A 21	3332-3371	LRP1_HUMAN Prolow-density lipoprotein receptor-related protein 1
Q07954	LRP1	4364	1000	K.QSGDVTCN#CTDGR.V	8.71	7.49	8.1	0.86267	-1.03	3.335	EGF-like 21	4340-4375	LRP1_HUMAN Prolow-density lipoprotein receptor-related protein 1
Q08174	PCDH1	305	26.889	K.AN#DSDQGANAEIEYTFHQAPEVVRR.L	N/A	30.3	30.3	N/A	0.88	2.389	Cadherin 3	281-387	PCDH1_HUMAN Protocadherin-1
Q08334	IL10RB	49	1000	K.GN#LTFTAQYLSYR.I	N/A	6.38	6.38	N/A	0.15	3.536	Fibronectin type-III 1	23-111	I10R2_HUMAN Interleukin-10 receptor subunit beta
Q08334	IL10RB	161	1000	K.N#GTDEK.F	5.03	4.97	5	0.0424264	-0.3	1.656	Fibronectin type-III 2	114-216	I10R2_HUMAN Interleukin-10 receptor subunit beta
Q08722	CD47	73	1000	K.GRDIYTFDGALN#K.S	19.84	16.06	17.95	2.67286	0.1	5.377	Ig-like V-type	19-127	CD47_HUMAN Leukocyte surface antigen CD47
Q08722	CD47	111	1000	K.MDKSDAVSHTGN#YTCEVTELTR.E	N/A	>200	>200	N/A	-0.08	5.145	Ig-like V-type	19-127	CD47_HUMAN Leukocyte surface antigen CD47
Q12913	PTPRJ	525	1000	K.GPN#GTEGASR.T	N/A	17.63	17.63	N/A	0.11	3.683	Fibronectin type-III 5	457-541	PTPRJ_HUMAN Receptor-type tyrosine-protein phosphatase eta
Q13308	PTK7	116	97.748	R.SAN#ASFNIK.W	10.04	N/A	10.04	N/A	-9.83	2.452	Ig-like C2-type 1	31-120	PTK7_HUMAN Inactive tyrosine-protein kinase 7
Q13308	PTK7	283	1000	R.ATVFAN#GSLLLTQVRPR.N	N/A	27.53	27.53	N/A	-4.77	3.108	Ig-like C2-type 3	225-317	PTK7_HUMAN Inactive tyrosine-protein kinase 7
Q13308	PTK7	405	1000	R.RQDVN#ITVATVPSWLK.K	N/A	17.89	17.89	N/A	-0.63	4.174	Ig-like C2-type 4	309-407	PTK7_HUMAN Inactive tyrosine-protein kinase 7
Q13332	PTPRS	733	1000	R.KVEAEALN#ATAIR.V	16.1	15.91	16.01	0.13435	-0.91	2.837	Fibronectin type-III 5	723-831	PTPRS_HUMAN Receptor-type tyrosine-protein phosphatase S
Q13433	SLC39A6	67	17.009	R.YGEN#NSLSVEGFRK.L	12.55	8.91	10.73	2.57387	3.09	5.437			S39A6_HUMAN Zinc transporter ZIP6
Q13433	SLC39A6	241	1000	K.TN#ESVSEPR.K	7.64	6.76	7.2	0.622254	-2.31	3.049			S39A6_HUMAN Zinc transporter ZIP6
Q13444	ADAM15	237	1000	K.YRDFQHLLN#R.T	45.77	40.29	43.03	3.87495	6.22	3.18	Peptidase M12B	213-414	ADA15_HUMAN Disintegrin and metalloproteinase domain-containing protein 15
Q13641	TPBG	81	1000	R.N#LTEVPTDLPAYVR.N	16.61	11.41	14.01	3.67696	-0.27	4.5	LRRNT	53-91	TPBG_HUMAN Trophoblast glycoprotein
Q13641	TPBG	256	132.25	R.N#LTHLESLHLEDNALK.V	18.31	12.47	15.39	4.1295	0.19	5.172			TPBG_HUMAN Trophoblast glycoprotein
Q13641	TPBG	275	1000	K.VLHN#GTLAELQGLPHIR.V	13.08	22.78	17.93	6.85894	-0.17	3.887			TPBG_HUMAN Trophoblast glycoprotein
Q13740	ALCAM	95	76.733	R.LNLSEN#YTLSISNAR.I	12.96	N/A	12.96	N/A	-0.09	4.615	Ig-like V-type 1	28-120	CD166_HUMAN CD166 antigen
Q13740	ALCAM	167	1000	K.KLGDCISEDSYPDGN#ITWYR.N	83.78	105.22	94.5	15.1604	0.12	2.055	Ig-like V-type 2	125-234	CD166_HUMAN CD166 antigen
Q13740	ALCAM	265	1000	K.EGDN#ITLK.C	104.52	108.28	106.4	2.65872	2.7	3.374	Ig-like C2-type 1	245-328	CD166_HUMAN CD166 antigen
Q13740	ALCAM	306	1000	R.RN#ATGDYK.C	11.4	10.04	10.72	0.961665	0.19	2.233	Ig-like C2-type 1	245-328	CD166_HUMAN CD166 antigen
Q13740	ALCAM	361	1000	R.N#ATVVWM*K.D	N/A	29.18	29.18	N/A	2.11	1.867	Ig-like C2-type 2	333-409	CD166_HUMAN CD166 antigen
Q13740	ALCAM	480	109.943	K.IIISPEEN#VTLTCTAENQLER.T	58.77	77.68	68.22	13.3714	-0.04	5.09	Ig-like C2-type 3	416-501	CD166_HUMAN CD166 antigen
Q13740-2	ALCAM	499	76.733	R.TVNSLN#VSANENR.E	19.84	20.86	20.35	0.721249	-8.7	3.44	Ig-like C2-type 3	416-501	CD166_HUMAN Isoform 2 of CD166 antigen
Q13813	SPTAN1	1356	1000	R.FLSDFRDLM*SWIN#GIR.G	N/A	42.04	42.04	N/A	2.16	2.763			SPTN1_HUMAN Spectrin alpha chain, non-erythrocytic 1
Q14126	DSG2	112	1000	K.DTGELN#VTSILDREETPFFLLTGYALDAR.G	N/A	3.8	3.8	N/A	0.12	5.433	Cadherin 1	50-160	DSG2_HUMAN Desmoglein-2
Q14126	DSG2	182	84.609	K.IN#ATDADEPNTLNSK.I	12.36	9.7	11.03	1.8809	-0.23	2.946	Cadherin 2	161-273	DSG2_HUMAN Desmoglein-2
Q14126	DSG2	462	1000	R.YVQN#GTYTVK.I	12.31	10.47	11.39	1.30108	-0.3	3.929	Cadherin 4	389-503	DSG2_HUMAN Desmoglein-2
Q14542	SLC29A2	48	1000	R.LAGAGN#STAR.I	37.04	23.13	30.08	9.83586	1.3	2.375			S29A2_HUMAN Equilibrative nucleoside transporter 2
Q14956	GPNMB	249	35.777	K.NDRN#SSDETFLK.D	>200	>200	>200	N/A	-1.04	4.386	PKD	240-327	GPNMB_HUMAN Transmembrane glycoprotein NMB
Q15043	SLC39A14	77	1000	R.GN#VTQHVQGHR.N	>200	>200	>200	N/A	-0.48	4.271			S39AE_HUMAN Zinc transporter ZIP14
Q15223	PVRL1	72	1000	K.STN#GSK.Q	12.48	15.41	13.94	2.07182	-0.29	2.354	Ig-like V-type	31-141	PVRL1_HUMAN Poliovirus receptor-related protein 1
Q15223	PVRL1	202	30.835	R.NPN#GTVTVISR.Y	>200	>200	>200	N/A	-0.14	2.683	Ig-like C2-type 1	149-238	PVRL1_HUMAN Poliovirus receptor-related protein 1
Q15223	PVRL1	297	1000	K.GVEAQN#R.T	22.49	19.83	21.16	1.8809	-0.73	2.729	Ig-like C2-type 2	247-334	PVRL1_HUMAN Poliovirus receptor-related protein 1
Q15262	PTPRK	416	1000	R.IAVDWESLGYN#ITR.C	N/A	11.04	11.04	N/A	2.66	4.812	Fibronectin type-III 2	392-488	PTPRK_HUMAN Receptor-type tyrosine-protein phosphatase kappa
Q15262	PTPRK	462	65.246	K.APQHVVNHLPPYTN#VSLK.M	51.8	N/A	51.8	N/A	4.15	4.717	Fibronectin type-III 2	392-488	PTPRK_HUMAN Receptor-type tyrosine-protein phosphatase kappa
Q15303	ERBB4	358	1000	K.FIN#CTK.I	6.61	6.71	6.66	0.0707107	1.12	2.373			ERBB4_HUMAN Receptor tyrosine-protein kinase erbB-4
Q15303	ERBB4	576	1000	K.MEDGLLTCHGPGPDN#CTK.C	19.14	15.18	17.16	2.80014	2.82	3.082			ERBB4_HUMAN Receptor tyrosine-protein kinase erbB-4
Q15758	SLC1A5	212	1000	R.SYSTTYEERN#ITGTR.V	21.4	17.25	19.32	2.93449	-0.59	3.626			AAAT_HUMAN Neutral amino acid transporter B(0)
Q15768	EFNB3	210	18.805	K.ENLPGDPTSN#ATSR.G	7.3	N/A	7.3	N/A	-0.71	2.048			EFNB3_HUMAN Ephrin-B3
Q15904	ATP6AP1	261	1000	K.QPVSPVIHPPVSYN#DTAPR.I	54.41	63.4	58.9	6.35689	3	4.337			VAS1_HUMAN V-type proton ATPase subunit S1
Q16563	SYPL1	71	27.121	K.GQTEIQVNCPPAVTEN#K.T	N/A	>200	>200	N/A	-0.2	1.987	MARVEL	28-237	SYPL1_HUMAN Synaptophysin-like protein 1
Q29980	MICB	234	1000	R.N#ITLTWR.Q	6.85	N/A	6.85	N/A	-3.88	2.899	Ig-like C2-type	207-296	MICB_HUMAN MHC class I polypeptide-related sequence B
Q29983	MICA	79	1000	R.AKPQGQWAEDVLGN#KTWDRETR.D	11.91	19.64	15.77	5.46594	0.46	6.357			MICA_HUMAN MHC class I polypeptide-related sequence A
Q29983	MICA	125	1000	R.VCEIHEDN#STR.S	57.49	30.83	44.16	18.8515	-2.09	3.028			MICA_HUMAN MHC class I polypeptide-related sequence A
Q29983	MICA	210	1000	R.TVPPMVN#VTR.S	>200	>200	>200	N/A	1.76	2.716	Ig-like C1-type	207-296	MICA_HUMAN MHC class I polypeptide-related sequence A
Q29983	MICA	220	1000	R.SEASEGN#ITVTCR.A	10.74	14.89	12.82	2.93449	-0.59	3.427	Ig-like C2-type	207-296	MICA_HUMAN MHC class I polypeptide-related sequence A
Q3MIR4	TMEM30B	241	13.378	R.RPVYELSPDPN#NTGFINQDFVVWM*R.T	N/A	51.64	51.64	N/A	-3.98	4.302			CC50B_HUMAN Cell cycle control protein 50B
Q3MIR4	TMEM30B	273	1000	R.IRQGN#YSAGLPR.G	39.07	N/A	39.07	N/A	4.44	5.167			CC50B_HUMAN Cell cycle control protein 50B
Q3MIR4	TMEM30B	286	36.556	R.GAYRVN#ITYNYPVR.A	>200	N/A	>200	N/A	-0.77	3.865			CC50B_HUMAN Cell cycle control protein 50B
Q3ZCQ3	FAM174B	53	1000	R.ESRPPPGPGPGN#TTR.F	N/A	19.35	19.35	N/A	-0.46	3.955			F174B_HUMAN Membrane protein FAM174B
Q4KMQ2	ANO6	493	30.835	K.NIN#GTDPIQK.Y	22.65	12.75	17.7	7.00036	5.96	2.938			ANO6_HUMAN Anoctamin-6
Q4KMQ2	ANO6	802	29.667	K.GNPYSDLGN#HTTCR.Y	>200	>200	>200	N/A	-0.19	1.937			ANO6_HUMAN Anoctamin-6
Q58DX5	NAALADL2	295	37.54	K.N#VTNQIALLK.L	22.36	14.82	18.59	5.33159	-0.65	3.465			NADL2_HUMAN Inactive N-acetylated-alpha-linked acidic dipeptidase-like protein 2
Q58DX5	NAALADL2	556	48.874	K.NNFN#CTR.R	19.87	15.4	17.63	3.16077	-5.46	2.439			NADL2_HUMAN Inactive N-acetylated-alpha-linked acidic dipeptidase-like protein 2
Q58EX2	SDK2	577	1000	R.VISAGGN#DSR.S	29.81	21.65	25.73	5.76999	0.35	2.446	Ig-like C2-type 6	496-585	SDK2_HUMAN Protein sidekick-2
Q58EX2	SDK2	936	33.657	R.ISWEEYN#RTNTR.V	N/A	27.74	27.74	N/A	-0.31	3.067	Fibronectin type-III 4	897-991	SDK2_HUMAN Protein sidekick-2
Q5HYA8	TMEM67	179	1000	R.CEPTFVN#TSR.S	41.97	N/A	41.97	N/A	-0.44	1.94			MKS3_HUMAN Meckelin
Q5MY95	ENTPD8	135	1000	R.KN#SSQAR.D	55.49	58.53	57.01	2.1496	-0.61	2.653			ENTP8_HUMAN Ectonucleoside triphosphate diphosphohydrolase 8
Q5SZK8	FREM2	2121	1000	K.ATVSIN#DSVSDLPK.M	5.6	N/A	5.6	N/A	6.64	1.987	Calx-beta 4	2118-2220	FREM2_HUMAN FRAS1-related extracellular matrix protein 2
Q5VU97	CACHD1	329	24.437	R.STNN#NTK.F	13.84	16.12	14.98	1.6122	-0.08	2.481	VWFA	228-443	CAHD1_HUMAN VWFA and cache domain-containing protein 1
Q5ZPR3	CD276	91	1000	K.QLVHSFAEGQDQGSAYAN#R.T	14.86	21.31	18.09	4.56084	3.78	4.905	Ig-like V-type 1	29-139	CD276_HUMAN CD276 antigen
Q5ZPR3	CD276	104	1000	R.TALFPDLLAQGN#ASLR.L	18.59	17.61	18.1	0.692965	-1.17	3.712	Ig-like V-type 1	29-139	CD276_HUMAN CD276 antigen
Q5ZPR3	CD276	215	1000	R.VVLGAN#GTYSCLVR.N	26.63	41.31	33.97	10.3803	1.72	3.252	Ig-like C2-type 1	145-238	CD276_HUMAN CD276 antigen
Q5ZPR3	CD276	309	1000	R.DQGSAYAN#R.T	N/A	10.27	10.27	N/A	0.39	3.33	Ig-like V-type 2	243-357	CD276_HUMAN CD276 antigen
Q658P3	STEAP3	344	1000	K.QVLAN#K.S	18.19	20.07	19.13	1.32936	-0.33	2.686			STEA3_HUMAN Metalloreductase STEAP3
Q6EMK4	VASN	117	1000	R.LHEITN#ETFR.G	>200	>200	>200	N/A	3.9	3.23			VASN_HUMAN Vasorin
Q6H3X3	RAET1G	82	1000	K.KLN#VTTAWK.A	12.06	13.72	12.89	1.1738	-0.17	5.874			RET1G_HUMAN Retinoic acid early transcript 1G protein
Q6P4Q7	CNNM4	85	33.657	R.LYGYSLGN#ISSNLISFTEVDDAETLHK.S	30.34	31.05	30.69	0.502046	-1.24	5.844			CNNM4_HUMAN Metal transporter CNNM4
Q6P4Q7	CNNM4	127	1000	R.GN#TSGVLVVLTK.F	38.62	26.05	32.34	8.88833	0.36	3.484			CNNM4_HUMAN Metal transporter CNNM4
Q6UXD5	SEZ6L2	641	1000	K.EVPRN#DTCPELPPPEWGWR.T	16.43	N/A	16.43	N/A	-1.02	4.846			SE6L2_HUMAN Seizure 6-like protein 2
Q6UXI9	NPNT	273	1000	K.GN#GTILK.G	9.14	9.83	9.49	0.487904	0.32	1.725			NPNT_HUMAN Nephronectin
Q6YHK3	CD109	118	1000	R.TQDEILFSN#STR.L	8.03	9.83	8.93	1.27279	0.36	3.255			CD109_HUMAN CD109 antigen
Q6YHK3	CD109	419	1000	K.IN#YTVPQSGTFK.I	7.42	8.33	7.88	0.643467	5.3	2.83			CD109_HUMAN CD109 antigen
Q6ZMP0	THSD4	709	1000	R.QVYAN#R.S	8.64	8.93	8.79	0.205061	0.22	1.988	TSP type-1 2	676-737	THSD4_HUMAN Thrombospondin type-1 domain-containing protein 4
Q6ZUK4	TMEM26	110	52.403	R.KEDFN#QTLTSNEQTSR.A	14.2	N/A	14.2	N/A	-7.52	2.082			TMM26_HUMAN Transmembrane protein 26
Q7Z5N4	SDK1	1767	1000	K.N#LTSHTK.Y	25.5	13.65	19.58	8.37922	-1.72	1.93	Fibronectin type-III 11	1704-1800	SDK1_HUMAN Protein sidekick-1
Q86SQ4	GPR126	143	1000	K.GFN#ASYIR.V	23.83	11.89	17.86	8.44285	9.36	2.48	CUB	41-149	GP126_HUMAN G-protein coupled receptor 126
Q86SQ4	GPR126	505	24.437	K.NN#ESLDEGLR.L	10.55	N/A	10.55	N/A	8.14	3.828			GP126_HUMAN G-protein coupled receptor 126
Q86WC4	OSTM1	135	1000	R.AAGN#TSESQSCAR.S	>200	N/A	>200	N/A	-1.39	4.373			OSTM1_HUMAN Osteopetrosis-associated transmembrane protein 1
Q8IWA5	SLC44A2	417	132.105	K.TCNPETFPSSN#ESR.Q	127.09	104.44	115.77	16.016	-0.39	5.22			CTL2_HUMAN Choline transporter-like protein 2
Q8IWT6	LRRC8A	66	1000	K.DSCN#DSFR.G	15.63	15.53	15.58	0.0707107	-0.13	2.044			LRC8A_HUMAN Leucine-rich repeat-containing protein 8A
Q8IWU5	SULF2	132	1000	R.TFAVYLN#STGYR.T	N/A	8.54	8.54	N/A	1.09	2.375			SULF2_HUMAN Extracellular sulfatase Sulf-2
Q8IWU5	SULF2	171	1000	R.FYN#YTLCR.N	5.76	4.91	5.33	0.601041	-0.35	3.039			SULF2_HUMAN Extracellular sulfatase Sulf-2
Q8N0Z9	VSIG10	347	1000	R.N#LTQPEVIIQPSSR.H	18.72	13.47	16.09	3.71231	-0.21	3.176	Ig-like C2-type 4	311-404	VSI10_HUMAN V-set and immunoglobulin domain-containing protein 10
Q8N271	PROM2	725	1000	R.N#VSECFLAR.E	17.92	23.39	20.66	3.86787	4.18	3.001			PROM2_HUMAN Prominin-2
Q8N441	FGFRL1	231	1000	R.AGAIN#ATYK.V	14.68	N/A	14.68	N/A	0.34	2.026	Ig-like C2-type 2	147-237	FGRL1_HUMAN Fibroblast growth factor receptor-like 1
Q8N6C5	IGSF1	607	1000	K.N#LTLWCR.S	N/A	152.98	152.98	N/A	0.38	2.943	Ig-like C2-type 6	589-677	IGSF1_HUMAN Immunoglobulin superfamily member 1
Q8N6C5	IGSF1	1223	1000	K.GIGN#YSCSYR.L	>200	N/A	>200	N/A	-5.46	3.921	Ig-like C2-type 12	1161-1242	IGSF1_HUMAN Immunoglobulin superfamily member 1
Q8N8Z6	DCBLD1	64	47.574	K.NYPGTYPN#HTVCEK.T	8.96	11.42	10.19	1.73948	7.68	3.408	CUB	41-150	DCBD1_HUMAN Discoidin, CUB and LCCL domain-containing protein 1
Q8NC42	RNF149	131	100.017	R.RN#ASAVVLYNEER.Y	>200	>200	>200	N/A	0.02	3.69	PA	67-175	RN149_HUMAN E3 ubiquitin-protein ligase RNF149
Q8NE01	CNNM3	73	1000	R.LFGPGFAN#SSWSWVAPEGAGCREEAASPAGEWR.A	N/A	8.72	8.72	N/A	-0.74	6.502			CNNM3_HUMAN Metal transporter CNNM3
Q8NFZ8	CADM4	67	1000	R.QTLFFN#GTR.A	25.79	23.78	24.78	1.42128	5.58	3.834	Ig-like V-type	21-119	CADM4_HUMAN Cell adhesion molecule 4
Q8TAB3	PCDH19	546	1000	K.DGGLPSLQSN#ATVR.V	12.49	9.3	10.9	2.25567	0.23	1.735	Cadherin 5	454-563	PCD19_HUMAN Protocadherin-19
Q8WWI5	SLC44A1	180	1000	R.CAPVN#ISCYAK.F	N/A	>200	>200	N/A	0.14	3.588			CTL1_HUMAN Choline transporter-like protein 1
Q8WWY8	LIPH	357	1000	K.AGN#TTESK.I	18.43	12.79	15.61	3.98808	-0.65	2.717			LIPH_HUMAN Lipase member H
Q8WXI7	MUC16	12416	1000	R.KFN#TTER.V	54.28	60.27	57.27	4.23557	-1.21	1.693	SEA 3	12368-12504	MUC16_HUMAN Mucin-16
Q92508	PIEZO1	2294	1000	R.ELYN#GTADITLR.F	38.97	30.51	34.74	5.98212	8.46	3.79			PIEZ1_HUMAN Piezo-type mechanosensitive ion channel component 1
Q92508	PIEZO1	2331	1000	K.HMLALAPN#STAR.R	33.47	30.18	31.83	2.32638	-0.14	2.714			PIEZ1_HUMAN Piezo-type mechanosensitive ion channel component 1
Q92542	NCSTN	387	1000	R.TSLELWM*HTDPVSQKN#ESVR.N	61.08	58.48	59.78	1.83848	0.06	4.161			NICA_HUMAN Nicastrin
Q92542	NCSTN	417	1000	R.RPN#QSQPLPPSSLQR.F	108.78	109.71	109.25	0.657609	-0.7	4.982			NICA_HUMAN Nicastrin
Q92542	NCSTN	612	1000	K.DLYEYSWVQGPLHSN#ETDRLPR.C	26.92	22.01	24.47	3.47189	1.09	5.311			NICA_HUMAN Nicastrin
Q92823	NRCAM	223	1000	R.FN#HTQTIQQK.Q	28.36	36.87	32.61	6.01748	-0.58	2.626	Ig-like 2	141-235	NRCAM_HUMAN Neuronal cell adhesion molecule
Q92823	NRCAM	276	45.026	R.ERPPTFLTPEGN#ASNK.E	21.65	22.96	22.3	0.92631	0.96	4.873	Ig-like 3	267-356	NRCAM_HUMAN Neuronal cell adhesion molecule
Q92823	NRCAM	858	28.934	R.VNVVN#STLAEVHWDPVPLK.S	15.33	20.04	17.68	3.33047	0.3	4.39	Fibronectin type-III 3	848-950	NRCAM_HUMAN Neuronal cell adhesion molecule
Q92823	NRCAM	1019	48.874	K.NLN#FSTR.Y	21.64	N/A	21.64	N/A	-2.53	2.794	Fibronectin type-III 4	954-1051	NRCAM_HUMAN Neuronal cell adhesion molecule
Q92854	SEMA4D	379	71.753	R.AAN#YTSSLNLPDK.T	9.71	8.24	8.97	1.03945	4.88	1.967	Sema	22-500	SEM4D_HUMAN Semaphorin-4D
Q96HA4	C1orf159	128	1000	R.SFAGPGAPFPMN#R.S	32.03	29.05	30.54	2.10718	2.9	3.621			CA159_HUMAN Uncharacterized protein C1orf159
Q96K49	TMEM87B	68	1000	K.TMFN#STDIK.L	>200	>200	>200	N/A	2.09	2.104			TM87B_HUMAN Transmembrane protein 87B
Q96NT5	SLC46A1	58	1000	R.FSADLGYN#GTR.Q	37.88	24.6	31.24	9.39038	-0.66	4.023			PCFT_HUMAN Proton-coupled folate transporter
Q96NY8	PVRL4	281	1000	K.CLSEGQPPPSYN#WTR.L	27.56	N/A	27.56	N/A	-0.15	1.583	Ig-like C2-type 2	248-331	PVRL4_HUMAN Poliovirus receptor-related protein 4
Q96QE2	SLC2A13	433	1000	R.ITFKPIAPSGQN#ATCTR.Y	>200	>200	>200	N/A	4.28	2.757			MYCT_HUMAN Proton myo-inositol cotransporter
Q96RD7	PANX1	255	1000	K.SGILRN#DSTVPDQFQCK.L	25.11	13.86	19.49	7.95495	3.2	3.627			PANX1_HUMAN Pannexin-1
Q99523	SORT1	162	24.437	K.DITDLIN#NTFIR.T	7.5	7.51	7.51	0.00707107	0.92	4.376			SORT_HUMAN Sortilin
Q99571	P2RX4	75	1000	K.GVAVTN#TSK.L	37.56	28.87	33.22	6.14476	-0.48	2.328			P2RX4_HUMAN P2X purinoceptor 4
Q9BRN9	TM2D3	157	1000	R.QRYPAN#CTVR.D	N/A	>200	>200	N/A	-3.5	3.531			TM2D3_HUMAN TM2 domain-containing protein 3
Q9BTN0	LRFN3	339	1000	R.LLGN#SSR.A	N/A	76.67	76.67	N/A	-0.61	1.936	Ig-like	295-382	LRFN3_HUMAN Leucine-rich repeat and fibronectin type-III domain-containing protein 3
Q9BY67	CADM1	101	1000	R.FQLLN#FSSSELK.V	10.54	N/A	10.54	N/A	-1.41	4.664	Ig-like V-type	45-139	CADM1_HUMAN Cell adhesion molecule 1
Q9BY67	CADM1	113	1000	K.VSLTN#VSISDEGR.Y	36.89	N/A	36.89	N/A	5.67	4.015	Ig-like V-type	45-139	CADM1_HUMAN Cell adhesion molecule 1
Q9C0C4	SEMA4C	106	24.437	K.NN#QTECFNFIR.F	11.02	15.39	13.21	3.09006	3.55	4.095	Sema	30-497	SEM4C_HUMAN Semaphorin-4C
Q9C0C4	SEMA4C	121	1000	R.FLQPYN#ASHLYVCGTYAFQPK.C	11.44	10.98	11.21	0.325269	1.56	3.247	Sema	30-497	SEM4C_HUMAN Semaphorin-4C
Q9C0C4	SEMA4C	522	1000	R.DPYCAWSVN#TSR.C	16.73	N/A	16.73	N/A	-0.28	3.546	PSI	499-551	SEM4C_HUMAN Semaphorin-4C
Q9H0U3	MAGT1	71	1000	K.APPRN#YSVIVMFTALQLHR.Q	34.72	18.33	26.52	11.5895	6.45	6.879	Thioredoxin	47-175	MAGT1_HUMAN Magnesium transporter protein 1
Q9H0X4	ITFG3	314	1000	K.SDPHWESMLN#ATTR.R	N/A	>200	>200	N/A	-0.01	3.344			ITFG3_HUMAN Protein ITFG3
Q9H0X4	ITFG3	389	1000	R.YKPDTLAVAVEN#GTGTDR.Q	17.73	15.52	16.63	1.56271	5.56	5.613			ITFG3_HUMAN Protein ITFG3
Q9H2X9	SLC12A5	333	1000	K.LAWEGN#ETVTTR.L	N/A	71.29	71.29	N/A	-0.99	2.338			S12A5_HUMAN Solute carrier family 12 member 5
Q9H6X2	ANTXR1	184	1000	K.DFN#ETQLAR.I	N/A	17.81	17.81	N/A	-0.06	3.037	VWFA	44-215	ANTR1_HUMAN Anthrax toxin receptor 1
Q9H8M5	CNNM2	112	24.437	R.VYGQNINN#ETWSR.I	N/A	13.74	13.74	N/A	-0.45	3.844			CNNM2_HUMAN Metal transporter CNNM2
Q9HC56	PCDH9	450	1000	K.IVASDSGKPSLN#QTALVR.V	11.28	12.36	11.82	0.763675	1.97	3.632	Cadherin 4	365-469	PCDH9_HUMAN Protocadherin-9
Q9HC58	SLC24A3	86	31.596	K.N#CTEPALHEFPNDIFTNEDRR.Q	N/A	>200	>200	N/A	-0.97	4.103			NCKX3_HUMAN Sodium/potassium/calcium exchanger 3
Q9HCN3	TMEM8A	535	1000	R.GWSCTDN#STAQTVAQQR.A	23.49	31.04	27.27	5.33866	0.3	2.113			TMM8A_HUMAN Transmembrane protein 8A
Q9HCU4	CELSR2	1036	20.167	R.LLDRNDNPPVLGNFEILFNNYVTN#R.S	9.55	N/A	9.55	N/A	0.53	9.089	Cadherin 9	1028-1146	CELR2_HUMAN Cadherin EGF LAG seven-pass G-type receptor 2
Q9HCU4	CELSR2	1076	115.01	R.GNELSLVLLN#ASTGELK.L	6.54	6.83	6.69	0.205061	2.56	4.733	Cadherin 9	1028-1146	CELR2_HUMAN Cadherin EGF LAG seven-pass G-type receptor 2
Q9HCU4	CELSR2	1501	1000	R.FGSVLGN#YSCAAQGTQGGSKK.S	N/A	16.82	16.82	N/A	1.56	5.777	Laminin G-like 1	1367-1571	CELR2_HUMAN Cadherin EGF LAG seven-pass G-type receptor 2
Q9HCU4	CELSR2	1741	1000	R.LHGLHLSN#ITVGGIPGPAGGVAR.G	46.98	54.83	50.9	5.55079	-1.13	5.644	Laminin G-like 2	1614-1971	CELR2_HUMAN Cadherin EGF LAG seven-pass G-type receptor 2
Q9HCU4	CELSR2	1900	1000	K.GFDPDCN#K.T	5.19	5.13	5.16	0.0424264	-0.6	2.562	EGF-like 7	1883-1922	CELR2_HUMAN Cadherin EGF LAG seven-pass G-type receptor 2
Q9HCU4	CELSR2	2043	1000	R.N#ESGLDSGR.S	9.17	9.09	9.13	0.0565685	-0.17	3.331			CELR2_HUMAN Cadherin EGF LAG seven-pass G-type receptor 2
Q9HCU4	CELSR2	2061	1000	R.N#ATQHTAGYFGSDVK.V	10.06	9.12	9.59	0.66468	7.59	2.778			CELR2_HUMAN Cadherin EGF LAG seven-pass G-type receptor 2
Q9HDC9	APMAP	160	1000	R.AGPN#GTLFVADAYK.G	11.16	14.24	12.7	2.17789	-0.01	2.477			APMAP_HUMAN Adipocyte plasma membrane-associated protein
Q9NPH3	IL1RAP	118	1000	R.N#TTYCSK.V	13.93	14.79	14.36	0.608112	-0.83	2.247	Ig-like C2-type 1	21-128	IL1AP_HUMAN Interleukin-1 receptor accessory protein
Q9NPR2	SEMA4B	405	1000	R.KIN#SSLQLPDR.V	19.13	N/A	19.13	N/A	-0.09	3.631	Sema	42-518	SEM4B_HUMAN Semaphorin-4B
Q9NV96	TMEM30A	107	1000	K.CLSPDVTPCFCTIN#FTLEK.S	N/A	13.11	13.11	N/A	-3.07	1.824			CC50A_HUMAN Cell cycle control protein 50A
Q9NYQ6	CELSR1	1576	1000	K.DIGN#YSCAAQGTQTGSKK.S	7.21	8.2	7.7	0.700036	2.14	4.152	Laminin G-like 1	1442-1646	CELR1_HUMAN Cadherin EGF LAG seven-pass G-type receptor 1
Q9NYQ6	CELSR1	2122	1000	K.LSRN#ETQVDGAR.A	16.38	20.32	18.35	2.786	-0.5	3.746			CELR1_HUMAN Cadherin EGF LAG seven-pass G-type receptor 1
Q9NZU0	FLRT3	226	24.243	K.VFFNLVN#LTELSLVR.N	N/A	105.95	105.95	N/A	-0.45	2.353			FLRT3_HUMAN Leucine-rich repeat transmembrane protein FLRT3
Q9P055	JKAMP	37	1000	K.N#GSTEIYGECGVCPR.G	12.68	7.65	10.16	3.55675	1.28	2.133			JKAMP_HUMAN JNK1/MAPK8-associated membrane protein
Q9P2B2	PTGFRN	286	1000	K.N#VSVAEGK.E	15.55	8.65	12.1	4.87904	-0.28	2.755	Ig-like C2-type 3	276-394	FPRP_HUMAN Prostaglandin F2 receptor negative regulator
Q9P2B2	PTGFRN	300	1000	K.ELDLTCN#ITTDRADDVRPEVTWSFSR.M	N/A	9.41	9.41	N/A	0.13	4.718	Ig-like C2-type 3	276-394	FPRP_HUMAN Prostaglandin F2 receptor negative regulator
Q9P2B2	PTGFRN	600	1000	R.YSVLIMAEKPVGDLSSPN#ETK.Y	10.55	7.71	9.13	2.00818	1.54	5.405	Ig-like C2-type 5	544-662	FPRP_HUMAN Prostaglandin F2 receptor negative regulator
Q9UGT4	SUSD2	162	1000	K.SELVN#ETR.W	>200	165.19	182.6	N/A	-0.19	2.927			SUSD2_HUMAN Sushi domain-containing protein 2
Q9UGT4	SUSD2	494	1000	R.AQPGTMSN#GTETR.G	29.95	N/A	29.95	N/A	-0.76	2.699	VWFD	446-667	SUSD2_HUMAN Sushi domain-containing protein 2
Q9UHG3	PCYOX1	323	46.819	R.KMSN#ITFLNFDPPIEEFHQYYQHIVTTLVK.G	N/A	19.38	19.38	N/A	0.19	5.349			PCYOX_HUMAN Prenylcysteine oxidase 1
Q9UHN6	TMEM2	171	1000	K.DGSRN#ITLR.T	21.68	N/A	21.68	N/A	3.15	1.923	G8	121-245	TMEM2_HUMAN Transmembrane protein 2
Q9UHN6	TMEM2	292	1000	K.ILESERFDTHEYRN#ESR.R	130.82	N/A	130.82	N/A	7.31	3.252			TMEM2_HUMAN Transmembrane protein 2
Q9UHN6	TMEM2	739	1000	K.TTN#SSAADPR.E	20.88	15.34	18.11	3.91737	-0.34	3.322			TMEM2_HUMAN Transmembrane protein 2
Q9UHN6	TMEM2	1092	1000	R.QN#GSLSK.I	7.86	9.06	8.46	0.848528	-0.63	1.506			TMEM2_HUMAN Transmembrane protein 2
Q9UIG8	SLCO3A1	153	1000	R.WGAEGRDVCAAN#GSGGDEGPDPDLICR.N	11.51	10.04	10.78	1.03945	3.2	2.711			SO3A1_HUMAN Solute carrier organic anion transporter family member 3A1
Q9UIW2	PLXNA1	77	1000	K.LSGN#LTLLR.A	8.09	N/A	8.09	N/A	-0.7	3.744	Sema	27-512	PLXA1_HUMAN Plexin-A1
Q9UIW2	PLXNA1	1043	1000	K.YN#YTEDPTILR.I	8.63	7.12	7.88	1.06773	0.67	2.542	IPT/TIG 2	961-104	PLXA1_HUMAN Plexin-A1
Q9ULF5	SLC39A10	339	58.699	K.DLNEDDHHHECLN#VTQLLK.Y	52.95	57.82	55.39	3.44361	-0.36	3.815			S39AA_HUMAN Zinc transporter ZIP10
Q9ULI3	HEG1	1080	1000	K.RTFLN#TTVEK.H	>200	N/A	>200	N/A	0.96	3.459			HEG1_HUMAN Protein HEG homolog 1
Q9UM47	NOTCH3	1179	1000	R.CLHN#GTCVDLVGGFR.C	18.68	7.18	12.93	8.13173	0.75	4.657	EGF-like 30	1160-1203	NOTC3_HUMAN Neurogenic locus notch homolog protein 3
Q9UN76	SLC6A14	155	1000	K.N#CSSWSDK.N	11.8	9.55	10.67	1.59099	4.38	2.025			S6A14_HUMAN Sodium- and chloride-dependent neutral and basic amino acid transporter B(0+)
Q9UN76	SLC6A14	174	30.612	R.SPIVTHCN#VSTVNK.G	29.86	29.49	29.67	0.26163	0.31	4.235			S6A14_HUMAN Sodium- and chloride-dependent neutral and basic amino acid transporter B(0+)
Q9UN76	SLC6A14	189	1000	K.GIQEIIQM*N#K.S	18.89	22.72	20.81	2.70822	-0.05	3.121			S6A14_HUMAN Sodium- and chloride-dependent neutral and basic amino acid transporter B(0+)
Q9UP38	FZD1	231	1000	K.FPVHGAGELCVGQN#TSDK.G	21.51	34.56	28.03	9.22774	4	3.437			FZD1_HUMAN Frizzled-1
Q9Y4D7	PLXND1	155	1000	R.RGN#ISAVAVR.F	N/A	12.87	12.87	N/A	-0.33	3.066	Sema	47-546	PLXD1_HUMAN Plexin-D1
Q9Y4D7	PLXND1	500	48.874	K.INLN#ESMQVVSR.R	21.21	14.79	18	4.53963	6.55	4.349	Sema	47-546	PLXD1_HUMAN Plexin-D1
Q9Y4D7	PLXND1	696	1000	K.AN#FTIYDCSR.T	>200	159.05	179.53	N/A	-0.4	2.817			PLXD1_HUMAN Plexin-D1
Q9Y4L1	HYOU1	515	1000	R.VFGSQN#LTTVK.L	22.33	N/A	22.33	N/A	-4.82	3.61			HYOU1_HUMAN Hypoxia up-regulated protein 1
Q9Y4L1	HYOU1	869	1000	K.N#ATLAEQAK.L	>200	>200	>200	N/A	0.9	2.771			HYOU1_HUMAN Hypoxia up-regulated protein 1
Q9Y4L1	HYOU1	931	1000	R.AEPPLN#ASASDQGEK.V	N/A	>200	>200	N/A	-0.43	1.757			HYOU1_HUMAN Hypoxia up-regulated protein 1
Q9Y5L3	ENTPD2	129	31.275	R.LLN#LTNPEASTSVLMAVTHTLTQYPFDFR.G	9.36	N/A	9.36	N/A	-0.43	5.059			ENTP2_HUMAN Ectonucleoside triphosphate diphosphohydrolase 2
Q9Y5Y6	ST14	485	1000	R.CDGWADCTDHSDELN#CSCDAGHQFTCK.N	9.68	9.81	9.74	0.0919239	4.96	4.449	LDL-receptor class A 1	452-487	ST14_HUMAN Suppressor of tumorigenicity 14 protein
Q9Y639	NPTN	197	73.311	K.N#ASNMEYR.I	18.19	17.79	17.99	0.282843	-0.16	3.06	Ig-like 2	148-235	NPTN_HUMAN Neuroplastin
Q9Y639	NPTN	229	1000	K.AN#ATIEVK.A	20.03	18.39	19.21	1.15966	-0.49	1.658	Ig-like 2	148-235	NPTN_HUMAN Neuroplastin
Q9Y653	GPR56	303	1000	K.N#SSQVLGEK.V	N/A	3.6	3.6	N/A	-0.49	2.211			GPR56_HUMAN G-protein coupled receptor 56
Q9Y6M7	SLC4A7	786	49.59	K.DN#ITAHNISWR.N	22.52	21.8	22.16	0.509117	9.44	3.883			S4A7_HUMAN Sodium bicarbonate cotransporter 3
Q9Y6M7	SLC4A7	796	1000	R.N#LTVSECK.K	30.61	19.3	24.95	7.99738	-0.04	1.837			S4A7_HUMAN Sodium bicarbonate cotransporter 3
