# Supplementary material for: Quantitative investigation of human cell surface N-glycoprotein dynamics
Source: Royal Society of Chemistry journal article supplement (doi:10.1039/c6sc01814a), 2016-08-15
Supplement: c6sc01814a12.xlsx [file c6sc01814a12.xlsx]

## Sheet: Sheet3
Table S9 - The Half-Lives of 248 Quantified Cell-Surface N-Glycoproteins
Uniprot ID	Gene Symbol	Half-Life in Expt# 1 (h)	Half-Life in Expt# 2 (h)	Median Half-Life (h)	Standard Deviation	Unique Glycopeptide Hits	Annotation
A1A5B4	ANO9	14.59	N/A	14.59	N/A	1	ANO9_HUMAN Anoctamin-9
A8MWY0	KIAA1324L	N/A	150.64	150.64	N/A	1	K132L_HUMAN UPF0577 protein KIAA1324-like
F2Z333	C1orf233	20.43	N/A	20.43	N/A	1	CA233_HUMAN Fibronectin type-III domain-containing transmembrane protein C1orf233
O00592	PODXL	N/A	16.66	16.66	N/A	1	PODXL_HUMAN Podocalyxin
O14494	PPAP2A	113.14	N/A	113.14	N/A	2	LPP1_HUMAN Lipid phosphate phosphohydrolase 1
O14672	ADAM10	22.42	21.55	21.98	0.615183	1	ADA10_HUMAN Disintegrin and metalloproteinase domain-containing protein 10
O14786	NRP1	5.16	5.52	5.34	0.254558	2	NRP1_HUMAN Neuropilin-1
O15031	PLXNB2	15.8	11.72	13.76	2.885	7	PLXB2_HUMAN Plexin-B2
O15230	LAMA5	17.65	17.94	17.79	0.205061	2	LAMA5_HUMAN Laminin subunit alpha-5
O15393	TMPRSS2	11.9	N/A	11.9	N/A	1	TMPS2_HUMAN Transmembrane protease serine 2
O15394	NCAM2	103.25	113.18	108.21	7.02157	4	NCAM2_HUMAN Neural cell adhesion molecule 2
O15455	TLR3	N/A	>200	>200	N/A	1	TLR3_HUMAN Toll-like receptor 3
O43157	PLXNB1	19.91	13.34	16.62	4.64569	1	PLXB1_HUMAN Plexin-B1
O43194	GPR39	40.55	N/A	40.55	N/A	1	GPR39_HUMAN G-protein coupled receptor 39
O43688	PPAP2C	N/A	48.15	48.15	N/A	1	LPP2_HUMAN Lipid phosphate phosphohydrolase 2
O60487	MPZL2	14.1	12.45	13.28	1.16673	1	MPZL2_HUMAN Myelin protein zero-like protein 2
O60603	TLR2	14.92	N/A	14.92	N/A	1	TLR2_HUMAN Toll-like receptor 2
O60637	TSPAN3	10.82	11.02	10.92	0.141421	2	TSN3_HUMAN Tetraspanin-3
O60814	HIST1H2BK	N/A	>200	>200	N/A	1	H2B1K_HUMAN Histone H2B type 1-K
O60896	RAMP3	18.74	17.05	17.9	1.19501	1	RAMP3_HUMAN Receptor activity-modifying protein 3
O75054	IGSF3	21.46	16.49	18.98	3.51432	6	IGSF3_HUMAN Immunoglobulin superfamily member 3
O75144	ICOSLG	108.24	108.18	108.21	0.0424264	2	ICOSL_HUMAN ICOS ligand
O75882	ATRN	41.99	49.95	45.97	5.62857	3	ATRN_HUMAN Attractin
O75954	TSPAN9	8.77	23.66	16.22	10.5288	2	TSN9_HUMAN Tetraspanin-9
O76082	SLC22A5	39.8	30.88	35.34	6.30739	2	S22A5_HUMAN Solute carrier family 22 member 5
O94805	ACTL6B	>200	N/A	>200	N/A	1	ACL6B_HUMAN Actin-like protein 6B
O95084	PRSS23	19.51	17	18.26	1.77484	2	PRS23_HUMAN Serine protease 23
O95136	S1PR2	28.67	29.24	28.95	0.403051	1	S1PR2_HUMAN Sphingosine 1-phosphate receptor 2
O95196	CSPG5	N/A	19.88	19.88	N/A	1	CSPG5_HUMAN Chondroitin sulfate proteoglycan 5
O95274	LYPD3	5.05	5.57	5.31	0.367696	3	LYPD3_HUMAN Ly6/PLAUR domain-containing protein 3
O95297	MPZL1	5.36	5.92	5.64	0.39598	1	MPZL1_HUMAN Myelin protein zero-like protein 1
O95857	TSPAN13	10.39	9.53	9.96	0.608112	1	TSN13_HUMAN Tetraspanin-13
O95858	TSPAN15	16.32	7.97	12.14	5.90434	2	TSN15_HUMAN Tetraspanin-15
P01892	HLA-A	25.61	18.24	21.93	5.21138	1	1A02_HUMAN HLA class I histocompatibility antigen, A-2 alpha chain
P02786	TFRC	20.39	16.29	18.34	2.89914	5	TFR1_HUMAN Transferrin receptor protein 1
P04156	PRNP	13.7	13.87	13.79	0.120208	2	PRIO_HUMAN Major prion protein
P04406	GAPDH	>200	>200	>200	N/A	2	G3P_HUMAN Glyceraldehyde-3-phosphate dehydrogenase
P04626	ERBB2	>200	>200	>200	N/A	2	ERBB2_HUMAN Receptor tyrosine-protein kinase erbB-2
P05026	ATP1B1	23.11	21.55	22.33	1.10309	4	AT1B1_HUMAN Sodium/potassium-transporting ATPase subunit beta-1
P05362	ICAM1	22.68	22.4	22.54	0.19799	3	ICAM1_HUMAN Intercellular adhesion molecule 1
P05556	ITGB1	20.62	27.76	24.19	5.04874	12	ITB1_HUMAN Integrin beta-1
P06213	INSR	16.05	23.14	19.6	5.01339	1	INSR_HUMAN Insulin receptor
P06280	GLA	N/A	>200	>200	N/A	1	AGAL_HUMAN Alpha-galactosidase A
P06731	CEACAM5	17.88	18.14	18.01	0.183848	7	CEAM5_HUMAN Carcinoembryonic antigen-related cell adhesion molecule 5
P06756	ITGAV	14.52	14.97	14.75	0.318198	6	ITAV_HUMAN Integrin alpha-V
P07339	CTSD	>200	N/A	>200	N/A	1	CATD_HUMAN Cathepsin D
P07602	PSAP	11.9	N/A	11.9	N/A	1	SAP_HUMAN Prosaposin
P08069	IGF1R	11.46	13.76	12.61	1.62635	7	IGF1R_HUMAN Insulin-like growth factor 1 receptor
P08174	CD55	>200	>200	>200	N/A	2	DAF_HUMAN Complement decay-accelerating factor
P08195	SLC3A2	29.26	25.05	27.15	2.97692	4	4F2_HUMAN 4F2 cell-surface antigen heavy chain
P08473	MME	94.42	68.1	81.26	18.6111	1	NEP_HUMAN Neprilysin
P08648	ITGA5	19.86	19.79	19.82	0.0494975	4	ITA5_HUMAN Integrin alpha-5
P08962	CD63	22.6	25.73	24.16	2.21324	1	CD63_HUMAN CD63 antigen
P09758	TACSTD2	12.77	21.29	17.03	6.02455	7	TACD2_HUMAN Tumor-associated calcium signal transducer 2
P10586	PTPRF	7.18	5.55	6.37	1.15258	2	PTPRF_HUMAN Receptor-type tyrosine-protein phosphatase F
P10909	CLU	9.55	11.79	10.67	1.58392	2	CLUS_HUMAN Clusterin
P11047	LAMC1	4.88	7.44	6.16	1.81019	4	LAMC1_HUMAN Laminin subunit gamma-1
P11166	SLC2A1	15.74	14.86	15.3	0.622254	1	GTR1_HUMAN Solute carrier family 2, facilitated glucose transporter member 1
P11279	LAMP1	124.11	110.17	117.14	9.85707	4	LAMP1_HUMAN Lysosome-associated membrane glycoprotein 1
P11362	FGFR1	5.47	N/A	5.47	N/A	1	FGFR1_HUMAN Fibroblast growth factor receptor 1
P11717	IGF2R	14.86	13.4	14.13	1.03238	1	MPRI_HUMAN Cation-independent mannose-6-phosphate receptor
P12821	ACE	>200	>200	>200	N/A	2	ACE_HUMAN Angiotensin-converting enzyme
P13473	LAMP2	>200	>200	>200	N/A	4	LAMP2_HUMAN Lysosome-associated membrane glycoprotein 2
P13987	CD59	N/A	15.28	15.28	N/A	1	CD59_HUMAN CD59 glycoprotein
P15151	PVR	58.65	N/A	58.65	N/A	1	PVR_HUMAN Poliovirus receptor
P15260	IFNGR1	3.75	3.35	3.55	0.282843	1	INGR1_HUMAN Interferon gamma receptor 1
P16070	CD44	11.29	N/A	11.29	N/A	3	CD44_HUMAN CD44 antigen
P16144	ITGB4	19.9	21.76	20.83	1.31522	1	ITB4_HUMAN Integrin beta-4
P16422	EPCAM	16.4	12.51	14.46	2.75065	3	EPCAM_HUMAN Epithelial cell adhesion molecule
P17181	IFNAR1	10.44	10	10.22	0.311127	2	INAR1_HUMAN Interferon alpha/beta receptor 1
P17301	ITGA2	27.76	18.19	22.98	6.76701	5	ITA2_HUMAN Integrin alpha-2
P18564	ITGB6	9.93	N/A	9.93	N/A	1	ITB6_HUMAN Integrin beta-6
P19256	CD58	21.71	15.96	18.83	4.06586	2	LFA3_HUMAN Lymphocyte function-associated antigen 3
P19438	TNFRSF1A	N/A	8.23	8.23	N/A	1	TNR1A_HUMAN Tumor necrosis factor receptor superfamily member 1A
P20645	M6PR	133.12	128.98	131.05	2.92742	2	MPRD_HUMAN Cation-dependent mannose-6-phosphate receptor
P21589	NT5E	26.08	21.86	23.97	2.98399	3	5NTD_HUMAN 5'-nucleotidase
P21802	FGFR2	N/A	154.81	154.81	N/A	1	FGFR2_HUMAN Fibroblast growth factor receptor 2
P21860	ERBB3	4.61	5.07	4.84	0.325269	3	ERBB3_HUMAN Receptor tyrosine-protein kinase erbB-3
P21926	CD9	N/A	61.73	61.73	N/A	1	CD9_HUMAN CD9 antigen
P22223	CDH3	2.97	3.02	2.99	0.0353553	1	CADH3_HUMAN Cadherin-3
P22413	ENPP1	25.21	20.08	22.64	3.62746	4	ENPP1_HUMAN Ectonucleotide pyrophosphatase/phosphodiesterase family member 1
P23229	ITGA6	17.83	24.83	21.33	4.94975	2	ITA6_HUMAN Integrin alpha-6
P25106	ACKR3	3.03	2.66	2.85	0.26163	1	ACKR3_HUMAN Atypical chemokine receptor 3
P25445	FAS	45.16	33.06	39.11	8.55599	1	TNR6_HUMAN Tumor necrosis factor receptor superfamily member 6
P26006	ITGA3	35.32	39.22	37.27	2.75772	6	ITA3_HUMAN Integrin alpha-3
P26012	ITGB8	6.99	7.12	7.05	0.0919239	1	ITB8_HUMAN Integrin beta-8
P27701	CD82	>200	N/A	>200	N/A	1	CD82_HUMAN CD82 antigen
P27824	CANX	>200	N/A	>200	N/A	1	CALX_HUMAN Calnexin
P29323	EPHB2	20.83	19.04	19.93	1.26572	1	EPHB2_HUMAN Ephrin type-B receptor 2
P30464	HLA-B	11.61	7.42	9.52	2.96278	1	1B15_HUMAN HLA class I histocompatibility antigen, B-15 alpha chain
P30825	SLC7A1	18.67	13.01	15.84	4.00222	2	CTR1_HUMAN High affinity cationic amino acid transporter 1
P30988	CALCR	>200	>200	>200	N/A	2	CALCR_HUMAN Calcitonin receptor
P32004	L1CAM	11.29	15.57	13.43	3.02642	3	L1CAM_HUMAN Neural cell adhesion molecule L1
P35052	GPC1	28.39	32.71	30.55	3.0547	1	GPC1_HUMAN Glypican-1
P35613	BSG	14.41	13.43	13.92	0.692965	5	BASI_HUMAN Basigin
P36941	LTBR	>200	N/A	>200	N/A	1	TNR3_HUMAN Tumor necrosis factor receptor superfamily member 3
P40189	IL6ST	15.88	14.75	15.31	0.799031	3	IL6RB_HUMAN Interleukin-6 receptor subunit beta
P42892	ECE1	23.97	21.88	22.93	1.47785	12	ECE1_HUMAN Endothelin-converting enzyme 1
P48509	CD151	111.12	N/A	111.12	N/A	2	CD151_HUMAN CD151 antigen
P48960	CD97	16.49	9.91	13.2	4.65276	5	CD97_HUMAN CD97 antigen
P50454	SERPINH1	17.1	17.86	17.48	0.537401	1	SERPH_HUMAN Serpin H1
P50895	BCAM	8.42	6.66	7.54	1.24451	1	BCAM_HUMAN Basal cell adhesion molecule
P51795	CLCN5	45.32	48	46.66	1.89505	2	CLCN5_HUMAN H(+)/Cl(-) exchange transporter 5
P51805	PLXNA3	>200	>200	>200	N/A	1	PLXA3_HUMAN Plexin-A3
P52569	SLC7A2	6.49	5.5	6	0.700036	1	CTR2_HUMAN Low affinity cationic amino acid transporter 2
P52797	EFNA3	10.41	10.82	10.61	0.289914	1	EFNA3_HUMAN Ephrin-A3
P53801	PTTG1IP	15.51	16.31	15.91	0.565685	1	PTTG_HUMAN Pituitary tumor-transforming gene 1 protein-interacting protein
P54709	ATP1B3	64.66	57.59	61.12	4.99924	4	AT1B3_HUMAN Sodium/potassium-transporting ATPase subunit beta-3
P55011	SLC12A2	N/A	18.14	18.14	N/A	1	S12A2_HUMAN Solute carrier family 12 member 2
P55268	LAMB2	13.13	17.31	15.22	2.95571	1	LAMB2_HUMAN Laminin subunit beta-2
P56159	GFRA1	7.32	8.95	8.13	1.15258	5	GFRA1_HUMAN GDNF family receptor alpha-1
P56749	CLDN12	N/A	13.72	13.72	N/A	1	CLD12_HUMAN Claudin-12
P78504	JAG1	8.15	5.59	6.87	1.81019	1	JAG1_HUMAN Protein jagged-1
P78536	ADAM17	115.34	110.05	112.7	3.74059	5	ADA17_HUMAN Disintegrin and metalloproteinase domain-containing protein 17
P78552	IL13RA1	N/A	62.41	62.41	N/A	1	I13R1_HUMAN Interleukin-13 receptor subunit alpha-1
P98160	HSPG2	>200	>200	>200	N/A	1	PGBM_HUMAN Basement membrane-specific heparan sulfate proteoglycan core protein
Q02487	DSC2	15.54	18.68	17.11	2.22032	1	DSC2_HUMAN Desmocollin-2
Q03405	PLAUR	16.55	17.75	17.15	0.848528	1	UPAR_HUMAN Urokinase plasminogen activator surface receptor
Q04721	NOTCH2	32.02	42.57	37.3	7.45998	1	NOTC2_HUMAN Neurogenic locus notch homolog protein 2
Q07954	LRP1	19.49	15.91	17.7	2.53144	4	LRP1_HUMAN Prolow-density lipoprotein receptor-related protein 1
Q08174	PCDH1	N/A	30.3	30.3	N/A	1	PCDH1_HUMAN Protocadherin-1
Q08334	IL10RB	5.03	5.67	5.35	0.452548	1	I10R2_HUMAN Interleukin-10 receptor subunit beta
Q08722	CD47	92.4	73.5	82.95	13.3643	3	CD47_HUMAN Leukocyte surface antigen CD47
Q12913	PTPRJ	106.28	108.82	107.55	1.79605	4	PTPRJ_HUMAN Receptor-type tyrosine-protein phosphatase eta
Q13308	PTK7	10.04	17.89	13.97	5.55079	3	PTK7_HUMAN Inactive tyrosine-protein kinase 7
Q13332	PTPRS	16.1	15.91	16.01	0.13435	1	PTPRS_HUMAN Receptor-type tyrosine-protein phosphatase S
Q13433	SLC39A6	8.09	8.74	8.42	0.459619	5	S39A6_HUMAN Zinc transporter ZIP6
Q13444	ADAM15	29.7	16.97	23.33	9.00147	2	ADA15_HUMAN Disintegrin and metalloproteinase domain-containing protein 15
Q13641	TPBG	14.84	12.47	13.66	1.67584	4	TPBG_HUMAN Trophoblast glycoprotein
Q13740-2	ALCAM	19.84	17.67	18.76	1.53442	13	CD166_HUMAN Isoform 2 of CD166 antigen
Q13813	SPTAN1	N/A	42.04	42.04	N/A	1	SPTN1_HUMAN Spectrin alpha chain, non-erythrocytic 1
Q14118	DAG1	19.38	21.02	20.2	1.15966	2	DAG1_HUMAN Dystroglycan
Q14126	DSG2	12.33	9.7	11.02	1.85969	2	DSG2_HUMAN Desmoglein-2
Q14542	SLC29A2	37.04	23.13	30.08	9.83586	1	S29A2_HUMAN Equilibrative nucleoside transporter 2
Q14956	GPNMB	>200	>200	>200	N/A	1	GPNMB_HUMAN Transmembrane glycoprotein NMB
Q15043	SLC39A14	>200	>200	>200	N/A	1	S39AE_HUMAN Zinc transporter ZIP14
Q15223	PVRL1	19.84	19.83	19.84	0.00707107	4	PVRL1_HUMAN Poliovirus receptor-related protein 1
Q15262	PTPRK	32.97	11.04	22.01	15.5069	3	PTPRK_HUMAN Receptor-type tyrosine-protein phosphatase kappa
Q15303	ERBB4	12.88	10.95	11.91	1.36472	2	ERBB4_HUMAN Receptor tyrosine-protein kinase erbB-4
Q15758	SLC1A5	21.4	17.25	19.32	2.93449	2	AAAT_HUMAN Neutral amino acid transporter B(0)
Q15768	EFNB3	7.3	7.37	7.33	0.0494975	1	EFNB3_HUMAN Ephrin-B3
Q15904	ATP6AP1	54.41	63.4	58.9	6.35689	1	VAS1_HUMAN V-type proton ATPase subunit S1
Q16563	SYPL1	>200	>200	>200	N/A	1	SYPL1_HUMAN Synaptophysin-like protein 1
Q29980	MICB	6.85	N/A	6.85	N/A	1	MICB_HUMAN MHC class I polypeptide-related sequence B
Q29983	MICA	16.75	32.18	24.47	10.9107	5	MICA_HUMAN MHC class I polypeptide-related sequence A
Q3MIR4	TMEM30B	39.26	35.57	37.41	2.60922	3	CC50B_HUMAN Cell cycle control protein 50B
Q3ZCQ3	FAM174B	N/A	19.35	19.35	N/A	1	F174B_HUMAN Membrane protein FAM174B
Q4KMQ2	ANO6	111.33	106.38	108.85	3.50018	2	ANO6_HUMAN Anoctamin-6
Q58DX5	NAALADL2	22.36	15.11	18.73	5.12652	3	NADL2_HUMAN Inactive N-acetylated-alpha-linked acidic dipeptidase-like protein 2
Q58EX2	SDK2	29.81	24.69	27.25	3.62039	1	SDK2_HUMAN Protein sidekick-2
Q5HYA8	TMEM67	41.97	N/A	41.97	N/A	1	MKS3_HUMAN Meckelin
Q5MY95	ENTPD8	55.49	58.53	57.01	2.1496	1	ENTP8_HUMAN Ectonucleoside triphosphate diphosphohydrolase 8
Q5SZK8	FREM2	5.6	N/A	5.6	N/A	1	FREM2_HUMAN FRAS1-related extracellular matrix protein 2
Q5VU97	CACHD1	13.84	16.12	14.98	1.6122	1	CAHD1_HUMAN VWFA and cache domain-containing protein 1
Q5VW38	GPR107	128.79	117.19	122.99	8.20244	1	GP107_HUMAN Protein GPR107
Q5ZPR3	CD276	18.59	19.46	19.02	0.615183	5	CD276_HUMAN CD276 antigen
Q658P3	STEAP3	18.19	20.07	19.13	1.32936	1	STEA3_HUMAN Metalloreductase STEAP3
Q6EMK4	VASN	>200	>200	>200	N/A	1	VASN_HUMAN Vasorin
Q6H3X3	RAET1G	12.06	13.72	12.89	1.1738	1	RET1G_HUMAN Retinoic acid early transcript 1G protein
Q6P4Q7	CNNM4	30.34	28.55	29.44	1.26572	3	CNNM4_HUMAN Metal transporter CNNM4
Q6PCB8	EMB	23.43	13.76	18.6	6.83772	1	EMB_HUMAN Embigin
Q6UXD5	SEZ6L2	16.43	N/A	16.43	N/A	1	SE6L2_HUMAN Seizure 6-like protein 2
Q6UXG2	KIAA1324	13.76	N/A	13.76	N/A	1	K1324_HUMAN UPF0577 protein KIAA1324
Q6UXI9	NPNT	9.14	9.83	9.49	0.487904	1	NPNT_HUMAN Nephronectin
Q6YHK3	CD109	7.73	9.08	8.4	0.954594	2	CD109_HUMAN CD109 antigen
Q6ZMP0	THSD4	8.64	8.93	8.79	0.205061	1	THSD4_HUMAN Thrombospondin type-1 domain-containing protein 4
Q6ZUK4	TMEM26	14.2	24.29	19.24	7.13471	1	TMM26_HUMAN Transmembrane protein 26
Q7KYR7	BTN2A1	25.17	25.45	25.31	0.19799	1	BT2A1_HUMAN Butyrophilin subfamily 2 member A1
Q7Z5N4	SDK1	20.57	13.65	17.11	4.89318	2	SDK1_HUMAN Protein sidekick-1
Q86SQ4	GPR126	23.83	105.95	64.89	58.0676	3	GP126_HUMAN G-protein coupled receptor 126
Q86UF1	TSPAN33	28.42	23.64	26.03	3.37997	1	TSN33_HUMAN Tetraspanin-33
Q86WC4	OSTM1	>200	N/A	>200	N/A	1	OSTM1_HUMAN Osteopetrosis-associated transmembrane protein 1
Q8IWA5	SLC44A2	38.78	45.6	42.19	4.82247	7	CTL2_HUMAN Choline transporter-like protein 2
Q8IWT6	LRRC8A	15.63	15.53	15.58	0.0707107	1	LRC8A_HUMAN Leucine-rich repeat-containing protein 8A
Q8IWU5	SULF2	5.76	6.72	6.24	0.678823	1	SULF2_HUMAN Extracellular sulfatase Sulf-2
Q8N0Z9	VSIG10	18.72	13.47	16.09	3.71231	1	VSI10_HUMAN V-set and immunoglobulin domain-containing protein 10
Q8N271	PROM2	17.92	23.39	20.66	3.86787	1	PROM2_HUMAN Prominin-2
Q8N441	FGFRL1	14.68	N/A	14.68	N/A	1	FGRL1_HUMAN Fibroblast growth factor receptor-like 1
Q8N6C5	IGSF1	>200	152.98	176.49	N/A	1	IGSF1_HUMAN Immunoglobulin superfamily member 1
Q8N8Z6	DCBLD1	8.96	11.42	10.19	1.73948	1	DCBD1_HUMAN Discoidin, CUB and LCCL domain-containing protein 1
Q8NBN3	TMEM87A	12.19	13.76	12.98	1.11016	1	TM87A_HUMAN Transmembrane protein 87A
Q8NC42	RNF149	>200	>200	>200	N/A	1	RN149_HUMAN E3 ubiquitin-protein ligase RNF149
Q8NCS7	SLC44A5	137.47	N/A	137.47	N/A	1	CTL5_HUMAN Choline transporter-like protein 5
Q8NE01	CNNM3	N/A	8.72	8.72	N/A	1	CNNM3_HUMAN Metal transporter CNNM3
Q8NFZ8	CADM4	21.49	23.78	22.64	1.61927	2	CADM4_HUMAN Cell adhesion molecule 4
Q8TAB3	PCDH19	12.49	9.3	10.9	2.25567	1	PCD19_HUMAN Protocadherin-19
Q8TB96	ITFG1	28.06	14.85	21.46	9.34088	1	TIP_HUMAN T-cell immunomodulatory protein
Q8TCJ2	STT3B	N/A	40	40	N/A	1	STT3B_HUMAN Dolichyl-diphosphooligosaccharide--protein glycosyltransferase subunit STT3B
Q8TCT8	SPPL2A	28.55	48.79	38.67	14.3118	1	SPP2A_HUMAN Signal peptide peptidase-like 2A
Q8WTV0	SCARB1	9.07	10	9.53	0.657609	1	SCRB1_HUMAN Scavenger receptor class B member 1
Q8WWI5	SLC44A1	N/A	>200	>200	N/A	1	CTL1_HUMAN Choline transporter-like protein 1
Q8WWY8	LIPH	18.43	12.79	15.61	3.98808	1	LIPH_HUMAN Lipase member H
Q8WXI7	MUC16	54.28	60.27	57.27	4.23557	1	MUC16_HUMAN Mucin-16
Q92508	PIEZO1	52	30.34	41.17	15.3159	4	PIEZ1_HUMAN Piezo-type mechanosensitive ion channel component 1
Q92542	NCSTN	113.46	104.02	108.74	6.67509	4	NICA_HUMAN Nicastrin
Q92823	NRCAM	21.64	26.85	24.25	3.68403	5	NRCAM_HUMAN Neuronal cell adhesion molecule
Q92854	SEMA4D	9.71	8.24	8.97	1.03945	1	SEM4D_HUMAN Semaphorin-4D
Q96HA4	C1orf159	32.03	23.4	27.72	6.10233	2	CA159_HUMAN Uncharacterized protein C1orf159
Q96K49	TMEM87B	>200	>200	>200	N/A	1	TM87B_HUMAN Transmembrane protein 87B
Q96NT5	SLC46A1	37.88	24.6	31.24	9.39038	1	PCFT_HUMAN Proton-coupled folate transporter
Q96NY8	PVRL4	27.56	N/A	27.56	N/A	1	PVRL4_HUMAN Poliovirus receptor-related protein 4
Q96QE2	SLC2A13	>200	>200	>200	N/A	1	MYCT_HUMAN Proton myo-inositol cotransporter
Q96RD7	PANX1	70.71	125.85	98.28	38.9899	1	PANX1_HUMAN Pannexin-1
Q99523	SORT1	7.5	7.51	7.51	0.00707107	1	SORT_HUMAN Sortilin
Q99571	P2RX4	37.56	28.87	33.22	6.14476	1	P2RX4_HUMAN P2X purinoceptor 4
Q9BRN9	TM2D3	N/A	>200	>200	N/A	1	TM2D3_HUMAN TM2 domain-containing protein 3
Q9BTN0	LRFN3	N/A	76.67	76.67	N/A	1	LRFN3_HUMAN Leucine-rich repeat and fibronectin type-III domain-containing protein 3
Q9BY67	CADM1	23.71	N/A	23.71	N/A	2	CADM1_HUMAN Cell adhesion molecule 1
Q9BZC7	ABCA2	106.32	105.68	106	0.452548	1	ABCA2_HUMAN ATP-binding cassette sub-family A member 2
Q9C0C4	SEMA4C	13.4	14.99	14.19	1.1243	5	SEM4C_HUMAN Semaphorin-4C
Q9H0U3	MAGT1	34.72	18.33	26.52	11.5895	1	MAGT1_HUMAN Magnesium transporter protein 1
Q9H0X4	ITFG3	14.2	15.52	14.86	0.933381	2	ITFG3_HUMAN Protein ITFG3
Q9H2X9	SLC12A5	N/A	25.94	25.94	N/A	3	S12A5_HUMAN Solute carrier family 12 member 5
Q9H6X2	ANTXR1	N/A	17.81	17.81	N/A	1	ANTR1_HUMAN Anthrax toxin receptor 1
Q9H8M5	CNNM2	17.08	13.74	15.41	2.36174	1	CNNM2_HUMAN Metal transporter CNNM2
Q9HC56	PCDH9	11.28	12.36	11.82	0.763675	1	PCDH9_HUMAN Protocadherin-9
Q9HC58	SLC24A3	N/A	>200	>200	N/A	1	NCKX3_HUMAN Sodium/potassium/calcium exchanger 3
Q9HCN3	TMEM8A	23.49	31.04	27.27	5.33866	2	TMM8A_HUMAN Transmembrane protein 8A
Q9HCU4	CELSR2	9.55	9.12	9.34	0.304056	9	CELR2_HUMAN Cadherin EGF LAG seven-pass G-type receptor 2
Q9HDC9	APMAP	11.16	14.24	12.7	2.17789	1	APMAP_HUMAN Adipocyte plasma membrane-associated protein
Q9NPH3	IL1RAP	13.93	16.14	15.04	1.56271	1	IL1AP_HUMAN Interleukin-1 receptor accessory protein
Q9NPR2	SEMA4B	19.13	20.12	19.62	0.700036	1	SEM4B_HUMAN Semaphorin-4B
Q9NV96	TMEM30A	N/A	13.11	13.11	N/A	1	CC50A_HUMAN Cell cycle control protein 50A
Q9NYQ6	CELSR1	7.51	8.42	7.97	0.643467	4	CELR1_HUMAN Cadherin EGF LAG seven-pass G-type receptor 1
Q9NZU0	FLRT3	N/A	105.95	105.95	N/A	1	FLRT3_HUMAN Leucine-rich repeat transmembrane protein FLRT3
Q9P055	JKAMP	12.68	7.65	10.16	3.55675	1	JKAMP_HUMAN JNK1/MAPK8-associated membrane protein
Q9P0K1	ADAM22	33.22	N/A	33.22	N/A	2	ADA22_HUMAN Disintegrin and metalloproteinase domain-containing protein 22
Q9P2B2	PTGFRN	10.55	9.41	9.98	0.806102	5	FPRP_HUMAN Prostaglandin F2 receptor negative regulator
Q9UGT4	SUSD2	32.01	38.1	35.05	4.30628	3	SUSD2_HUMAN Sushi domain-containing protein 2
Q9UHG3	PCYOX1	13.76	21.61	17.68	5.55079	2	PCYOX_HUMAN Prenylcysteine oxidase 1
Q9UHN6	TMEM2	21.68	15.44	18.56	4.41235	5	TMEM2_HUMAN Transmembrane protein 2
Q9UHW9	SLC12A6	17.57	27.75	22.66	7.19835	1	S12A6_HUMAN Solute carrier family 12 member 6
Q9UIG8	SLCO3A1	11.51	10.04	10.78	1.03945	1	SO3A1_HUMAN Solute carrier organic anion transporter family member 3A1
Q9UIW2	PLXNA1	8.09	7.12	7.6	0.685894	3	PLXA1_HUMAN Plexin-A1
Q9UJ14	GGT7	15.72	N/A	15.72	N/A	1	GGT7_HUMAN Gamma-glutamyltransferase 7
Q9UJW2-2	TINAG	>200	N/A	>200	N/A	1	TINAG_HUMAN Isoform 2 of Tubulointerstitial nephritis antigen
Q9ULF5	SLC39A10	52.95	57.82	55.39	3.44361	1	S39AA_HUMAN Zinc transporter ZIP10
Q9ULI3	HEG1	>200	N/A	>200	N/A	1	HEG1_HUMAN Protein HEG homolog 1
Q9UM47	NOTCH3	18.68	7.18	12.93	8.13173	1	NOTC3_HUMAN Neurogenic locus notch homolog protein 3
Q9UN76	SLC6A14	18.89	21.25	20.07	1.66877	4	S6A14_HUMAN Sodium- and chloride-dependent neutral and basic amino acid transporter B(0+)
Q9UP38	FZD1	21.51	N/A	21.51	N/A	1	FZD1_HUMAN Frizzled-1
Q9Y4D7	PLXND1	21.02	14.79	17.91	4.40528	3	PLXD1_HUMAN Plexin-D1
Q9Y4L1	HYOU1	15.53	10.77	13.15	3.36583	4	HYOU1_HUMAN Hypoxia up-regulated protein 1
Q9Y5L3	ENTPD2	9.36	8.99	9.17	0.26163	1	ENTP2_HUMAN Ectonucleoside triphosphate diphosphohydrolase 2
Q9Y5Y6	ST14	9.68	9.81	9.74	0.0919239	1	ST14_HUMAN Suppressor of tumorigenicity 14 protein
Q9Y639	NPTN	19.94	30.75	25.35	7.64382	14	NPTN_HUMAN Neuroplastin
Q9Y653	GPR56	N/A	3.6	3.6	N/A	1	GPR56_HUMAN G-protein coupled receptor 56
Q9Y6M7	SLC4A7	26.56	20.55	23.56	4.24971	2	S4A7_HUMAN Sodium bicarbonate cotransporter 3
