# Supplementary material for: Quantitative investigation of human cell surface N-glycoprotein dynamics
Source: PubMed Central journal article supplement — Chem Sci. 2016 Aug 15;8(1):268–77. doi: 10.1039/c6sc01814a (PMC5458730; doi:10.1039/c6sc01814a), 2016-08-15
Supplement: SC-008-C6SC01814A-s001.pdf [file SC-008-C6SC01814A-s001.pdf]

**Table S1 - Unique N-Glycosylation Sites (449 Si**

| <b>Uniprot ID</b> | <b>Gene Symbol</b> | <b>Site</b> | <b>ModScore</b> |
|-------------------|--------------------|-------------|-----------------|
| A1A5B4            | ANO9               | 641         | 1000            |
| A8MVW0            | FAM171A2           | 66          | 1000            |
| F2Z333            | C1orf233           | 109         | 1000            |
| O14494            | PPAP2A             | 142         | 1000            |
| O14497            | ARID1A             | 1308        | 0.52            |
| O14497            | ARID1A             | 1313        | 0.50            |
| O14672            | ADAM10             | 439         | 1000            |
| O14786            | NRP1               | 150         | 1000            |
| O14786            | NRP1               | 522         | 24.44           |
| O15031            | PLXNB2             | 127         | 1000            |
| O15031            | PLXNB2             | 391         | 114.97          |
| O15031            | PLXNB2             | 401         | 6.59            |
| O15031            | PLXNB2             | 528         | 1000            |
| O15031            | PLXNB2             | 733         | 1000            |
| O15031            | PLXNB2             | 844         | 1000            |
| O15031            | PLXNB2             | 1049        | 1000            |
| O15230            | LAMA5              | 2196        | 1000            |
| O15230            | LAMA5              | 3107        | 1000            |
| O15393            | TMPRSS2            | 213         | 22.49           |
| O15394            | NCAM2              | 219         | 1000            |
| O15394            | NCAM2              | 474         | 12.50           |
| O15394            | NCAM2              | 562         | 18.81           |
| O43157            | PLXNB1             | 1253        | 1000            |
| O43194            | GPR39              | 192         | 1000            |
| O60487            | MPZL2              | 39          | 1000            |
| O60603            | TLR2               | 414         | 73.31           |
| O60637            | TSPAN3             | 127         | 37.54           |
| O60637            | TSPAN3             | 167         | 1000            |
| O60896            | RAMP3              | 103         | 1000            |
| O75054            | IGSF3              | 101         | 1000            |
| O75054            | IGSF3              | 655         | 24.44           |
| O75054            | IGSF3              | 700         | 52.73           |
| O75054            | IGSF3              | 825         | 1000            |
| O75054            | IGSF3              | 842         | 1000            |
| O75144            | ICOSLG             | 70          | 22.49           |
| O75144            | ICOSLG             | 102         | 1000            |
| O75882            | ATRN               | 914         | 16.96           |

|        |         |      |        |
|--------|---------|------|--------|
| O75882 | ATRN    | 923  | 29.97  |
| O75882 | ATRN    | 1073 | 1000   |
| O75882 | ATRN    | 1082 | 1000   |
| O75954 | TSPAN9  | 180  | 1000   |
| O76082 | SLC22A5 | 57   | 1000   |
| O76082 | SLC22A5 | 91   | 1000   |
| O94805 | ACTL6B  | 159  | 1000   |
| O95084 | PRSS23  | 207  | 1000   |
| O95136 | S1PR2   | 19   | 1000   |
| O95274 | LYPD3   | 163  | 1000   |
| O95274 | LYPD3   | 176  | 1000   |
| O95274 | LYPD3   | 183  | 1000   |
| O95274 | LYPD3   | 227  | 39.66  |
| O95297 | MPZL1   | 50   | 1000   |
| O95857 | TSPAN13 | 137  | 17.01  |
| O95858 | TSPAN15 | 189  | 71.75  |
| P01892 | HLA-A   | 110  | 1000   |
| P02786 | TFRC    | 251  | 1000   |
| P02786 | TFRC    | 722  | 9.34   |
| P02786 | TFRC    | 723  | 24.44  |
| P02786 | TFRC    | 727  | 84.61  |
| P04156 | PRNP    | 197  | 1000   |
| P04406 | GAPDH   | 9    | 1000   |
| P04406 | GAPDH   | 225  | 1000   |
| P04626 | ERBB2   | 530  | 1000   |
| P04626 | ERBB2   | 571  | 1000   |
| P04626 | ERBB2   | 629  | 1000   |
| P05026 | ATP1B1  | 158  | 71.95  |
| P05026 | ATP1B1  | 193  | 1000   |
| P05362 | ICAM1   | 145  | 1000   |
| P05362 | ICAM1   | 267  | 78.16  |
| P05556 | ITGB1   | 205  | 3.12   |
| P05556 | ITGB1   | 212  | 67.17  |
| P05556 | ITGB1   | 406  | 73.31  |
| P05556 | ITGB1   | 411  | 132.11 |
| P05556 | ITGB1   | 481  | 1000   |
| P05556 | ITGB1   | 520  | 107.32 |
| P05556 | ITGB1   | 669  | 1000   |
| P06213 | INSR    | 920  | 1000   |
| P06731 | CEACAM5 | 152  | 13.38  |
| P06731 | CEACAM5 | 195  | 1000   |

|        |         |      |        |
|--------|---------|------|--------|
| P06731 | CEACAM5 | 197  | 1000   |
| P06731 | CEACAM5 | 204  | 1000   |
| P06731 | CEACAM5 | 375  | 17.01  |
| P06731 | CEACAM5 | 508  | 27.06  |
| P06731 | CEACAM5 | 580  | 9.30   |
| P06731 | CEACAM5 | 650  | 7.71   |
| P06731 | CEACAM5 | 665  | 7.71   |
| P06756 | ITGAV   | 74   | 1000   |
| P06756 | ITGAV   | 554  | 1000   |
| P06756 | ITGAV   | 704  | 1000   |
| P06756 | ITGAV   | 874  | 1000   |
| P06756 | ITGAV   | 945  | 11.02  |
| P07339 | CTSD    | 263  | 1000   |
| P07602 | PSAP    | 101  | 1000   |
| P08069 | IGF1R   | 244  | 60.09  |
| P08069 | IGF1R   | 314  | 1000   |
| P08069 | IGF1R   | 640  | 6.59   |
| P08069 | IGF1R   | 747  | 1000   |
| P08069 | IGF1R   | 900  | 53.53  |
| P08069 | IGF1R   | 913  | 1000   |
| P08174 | CD55    | 95   | 1000   |
| P08195 | SLC3A2  | 365  | 1000   |
| P08195 | SLC3A2  | 381  | 106.40 |
| P08195 | SLC3A2  | 424  | 44.28  |
| P08473 | MME     | 145  | 1000   |
| P08648 | ITGA5   | 297  | 1000   |
| P08648 | ITGA5   | 307  | 1000   |
| P08648 | ITGA5   | 593  | 1000   |
| P08648 | ITGA5   | 773  | 24.44  |
| P08648 | ITGA5   | 868  | 27.12  |
| P08962 | CD63    | 130  | 9.34   |
| P09603 | CSF1    | 154  | 13.38  |
| P09758 | TACSTD2 | 120  | 61.56  |
| P09758 | TACSTD2 | 168  | 1000   |
| P09758 | TACSTD2 | 208  | 1000   |
| P10586 | PTPRF   | 966  | 64.40  |
| P10909 | CLU     | 86   | 1000   |
| P10909 | CLU     | 291  | 1000   |
| P11047 | LAMC1   | 1022 | 16.06  |
| P11047 | LAMC1   | 1107 | 24.44  |
| P11047 | LAMC1   | 1380 | 44.28  |

|        |        |      |        |
|--------|--------|------|--------|
| P11047 | LAMC1  | 1439 | 1000   |
| P11166 | SLC2A1 | 45   | 1000   |
| P11279 | LAMP1  | 84   | 1000   |
| P11279 | LAMP1  | 103  | 1000   |
| P11279 | LAMP1  | 249  | 1000   |
| P11362 | FGFR1  | 317  | 1000   |
| P11717 | IGF2R  | 2085 | 1000   |
| P12821 | ACE    | 146  | 84.36  |
| P12821 | ACE    | 695  | 39.66  |
| P13473 | LAMP2  | 49   | 1000   |
| P13473 | LAMP2  | 58   | 1000   |
| P13473 | LAMP2  | 275  | 1000   |
| P13473 | LAMP2  | 356  | 1000   |
| P15151 | PVR    | 105  | 1000   |
| P15260 | IFNGR1 | 179  | 1000   |
| P16070 | CD44   | 57   | 1000   |
| P16144 | ITGB4  | 695  | 1000   |
| P16422 | EPCAM  | 74   | 1000   |
| P16422 | EPCAM  | 111  | 53.71  |
| P17181 | IFNAR1 | 81   | 1000   |
| P17181 | IFNAR1 | 172  | 1000   |
| P17301 | ITGA2  | 105  | 65.26  |
| P17301 | ITGA2  | 343  | 1000   |
| P17301 | ITGA2  | 460  | 35.80  |
| P17301 | ITGA2  | 471  | 2.02   |
| P17301 | ITGA2  | 475  | 4.09   |
| P17301 | ITGA2  | 1057 | 1000   |
| P18084 | ITGB5  | 586  | 4.09   |
| P18564 | ITGB6  | 463  | 1000   |
| P19256 | CD58   | 169  | 1000   |
| P20645 | M6PR   | 57   | 1000   |
| P20645 | M6PR   | 83   | 106.40 |
| P21589 | NT5E   | 53   | 1000   |
| P21589 | NT5E   | 333  | 1000   |
| P21860 | ERBB3  | 437  | 48.87  |
| P21860 | ERBB3  | 522  | 1000   |
| P21860 | ERBB3  | 616  | 5.07   |
| P22223 | CDH3   | 566  | 1000   |
| P22413 | ENPP1  | 285  | 1000   |
| P22413 | ENPP1  | 341  | 1000   |
| P22413 | ENPP1  | 477  | 16.27  |

|        |          |     |        |
|--------|----------|-----|--------|
| P23229 | ITGA6    | 770 | 12.09  |
| P23229 | ITGA6    | 966 | 47.05  |
| P25106 | ACKR3    | 192 | 9.34   |
| P25445 | FAS      | 136 | 36.70  |
| P26006 | ITGA3    | 265 | 1000   |
| P26006 | ITGA3    | 511 | 1000   |
| P26006 | ITGA3    | 969 | 37.54  |
| P26012 | ITGB8    | 466 | 42.19  |
| P27701 | CD82     | 198 | 1000   |
| P27824 | CANX     | 156 | 2.19   |
| P29323 | EPHB2    | 482 | 1000   |
| P30464 | HLA-B    | 110 | 1000   |
| P30825 | SLC7A1   | 226 | 84.36  |
| P30825 | SLC7A1   | 235 | 24.44  |
| P30988 | CALCR    | 91  | 1000   |
| P32004 | L1CAM    | 294 | 20.17  |
| P32004 | L1CAM    | 671 | 1000   |
| P32004 | L1CAM    | 849 | 1000   |
| P35052 | GPC1     | 116 | 1000   |
| P35613 | BSG      | 160 | 1000   |
| P35613 | BSG      | 268 | 1000   |
| P35613 | BSG      | 302 | 1000   |
| P36941 | LTBR     | 177 | 1000   |
| P40189 | IL6ST    | 83  | 1000   |
| P40189 | IL6ST    | 131 | 104.48 |
| P40189 | IL6ST    | 379 | 1000   |
| P40189 | IL6ST    | 383 | 1000   |
| P42892 | ECE1     | 166 | 1000   |
| P42892 | ECE1     | 187 | 1000   |
| P42892 | ECE1     | 249 | 17.01  |
| P42892 | ECE1     | 270 | 1000   |
| P42892 | ECE1     | 539 | 1000   |
| P42892 | ECE1     | 632 | 1000   |
| P42892 | ECE1     | 651 | 20.99  |
| P42892 | ECE1     | 660 | 15.01  |
| P48509 | CD151    | 159 | 5.09   |
| P48509 | CD151    | 160 | 6.59   |
| P48960 | CD97     | 38  | 9.39   |
| P48960 | CD97     | 108 | 38.37  |
| P48960 | CD97     | 371 | 1000   |
| P50454 | SERPINH1 | 120 | 1000   |

|        |         |      |       |
|--------|---------|------|-------|
| P50895 | BCAM    | 439  | 1000  |
| P51795 | CLCN5   | 405  | 7.97  |
| P51795 | CLCN5   | 408  | 23.62 |
| P51805 | PLXNA3  | 59   | 1000  |
| P52569 | SLC7A2  | 227  | 1000  |
| P52797 | EFNA3   | 100  | 1000  |
| P53801 | PTTG1IP | 54   | 78.16 |
| P54709 | ATP1B3  | 124  | 1000  |
| P54709 | ATP1B3  | 240  | 7.71  |
| P55011 | SLC12A2 | 553  | 9.34  |
| P55011 | SLC12A2 | 562  | 9.91  |
| P55268 | LAMB2   | 1249 | 1000  |
| P56159 | GFRA1   | 59   | 1000  |
| P56159 | GFRA1   | 152  | 24.44 |
| P56159 | GFRA1   | 406  | 20.99 |
| P78504 | JAG1    | 217  | 11.02 |
| P78536 | ADAM17  | 103  | 1000  |
| P78536 | ADAM17  | 452  | 1000  |
| P78536 | ADAM17  | 539  | 1000  |
| P78536 | ADAM17  | 598  | 2.02  |
| P98160 | HSPG2   | 89   | 1000  |
| Q02487 | DSC2    | 392  | 1000  |
| Q03405 | PLAUR   | 194  | 1000  |
| Q04721 | NOTCH2  | 46   | 32.22 |
| Q07954 | LRP1    | 357  | 1000  |
| Q07954 | LRP1    | 2521 | 1000  |
| Q07954 | LRP1    | 3333 | 1000  |
| Q07954 | LRP1    | 4364 | 1000  |
| Q08334 | IL10RB  | 161  | 1000  |
| Q08722 | CD47    | 73   | 1000  |
| Q08722 | CD47    | 111  | 1000  |
| Q12913 | PTPRJ   | 231  | 6.59  |
| Q12913 | PTPRJ   | 342  | 1000  |
| Q12913 | PTPRJ   | 351  | 1000  |
| Q12913 | PTPRJ   | 391  | 1000  |
| Q12913 | PTPRJ   | 396  | 1000  |
| Q12913 | PTPRJ   | 413  | 4.09  |
| Q13308 | PTK7    | 116  | 97.75 |
| Q13308 | PTK7    | 567  | 1000  |
| Q13308 | PTK7    | 574  | 1000  |
| Q13332 | PTPRS   | 733  | 1000  |

|          |          |     |        |
|----------|----------|-----|--------|
| Q13433   | SLC39A6  | 67  | 17.01  |
| Q13433   | SLC39A6  | 241 | 1000   |
| Q13433   | SLC39A6  | 266 | 12.79  |
| Q13433   | SLC39A6  | 283 | 2.02   |
| Q13444   | ADAM15   | 237 | 1000   |
| Q13444   | ADAM15   | 392 | 0.00   |
| Q13641   | TPBG     | 81  | 1000   |
| Q13641   | TPBG     | 256 | 121.36 |
| Q13641   | TPBG     | 275 | 1000   |
| Q13740   | ALCAM    | 95  | 76.73  |
| Q13740   | ALCAM    | 167 | 1000   |
| Q13740   | ALCAM    | 265 | 1000   |
| Q13740   | ALCAM    | 306 | 1000   |
| Q13740   | ALCAM    | 361 | 1000   |
| Q13740   | ALCAM    | 480 | 109.94 |
| Q13740-2 | ALCAM    | 499 | 76.73  |
| Q14118   | DAG1     | 641 | 1000   |
| Q14118   | DAG1     | 649 | 1000   |
| Q14126   | DSG2     | 182 | 71.07  |
| Q14126   | DSG2     | 462 | 1000   |
| Q14542   | SLC29A2  | 48  | 1000   |
| Q14956   | GPNMB    | 249 | 35.78  |
| Q15043   | SLC39A14 | 77  | 1000   |
| Q15223   | PVRL1    | 72  | 1000   |
| Q15223   | PVRL1    | 202 | 17.01  |
| Q15223   | PVRL1    | 297 | 1000   |
| Q15262   | PTPRK    | 416 | 1000   |
| Q15262   | PTPRK    | 436 | 1000   |
| Q15262   | PTPRK    | 462 | 65.25  |
| Q15303   | ERBB4    | 358 | 1000   |
| Q15303   | ERBB4    | 576 | 1000   |
| Q15758   | SLC1A5   | 212 | 1000   |
| Q15768   | EFNB3    | 210 | 18.81  |
| Q15904   | ATP6AP1  | 261 | 1000   |
| Q16563   | SYPL1    | 71  | 11.72  |
| Q29980   | MICB     | 234 | 1000   |
| Q29983   | MICA     | 79  | 1000   |
| Q29983   | MICA     | 125 | 1000   |
| Q29983   | MICA     | 210 | 1000   |
| Q29983   | MICA     | 220 | 1000   |
| Q3MIR4   | TMEM30B  | 273 | 1000   |

|        |          |      |       |
|--------|----------|------|-------|
| Q3MIR4 | TMEM30B  | 286  | 36.56 |
| Q4KMQ2 | ANO6     | 493  | 30.84 |
| Q4KMQ2 | ANO6     | 802  | 29.67 |
| Q58DX5 | NAALADL2 | 295  | 37.54 |
| Q58DX5 | NAALADL2 | 556  | 48.87 |
| Q58EX2 | SDK2     | 577  | 1000  |
| Q5HYA8 | TMEM67   | 179  | 1000  |
| Q5MY95 | ENTPD8   | 135  | 1000  |
| Q5SZK8 | FREM2    | 2121 | 1000  |
| Q5VU97 | CACHD1   | 329  | 24.44 |
| Q5VW38 | GPR107   | 169  | 5.22  |
| Q5VY80 | RAET1L   | 68   | 1000  |
| Q5ZPR3 | CD276    | 91   | 1000  |
| Q5ZPR3 | CD276    | 104  | 1000  |
| Q5ZPR3 | CD276    | 215  | 1000  |
| Q5ZPR3 | CD276    | 309  | 1000  |
| Q658P3 | STEAP3   | 344  | 1000  |
| Q6EMK4 | VASN     | 117  | 1000  |
| Q6H3X3 | RAET1G   | 82   | 1000  |
| Q6P4Q7 | CNNM4    | 85   | 33.66 |
| Q6P4Q7 | CNNM4    | 122  | 1000  |
| Q6P4Q7 | CNNM4    | 127  | 1000  |
| Q6PCB8 | EMB      | 213  | 1000  |
| Q6PCB8 | EMB      | 218  | 1000  |
| Q6UWV2 | MPZL3    | 123  | 1000  |
| Q6UXD5 | SEZ6L2   | 641  | 1000  |
| Q6UXG2 | KIAA1324 | 391  | 12.22 |
| Q6UXG2 | KIAA1324 | 404  | 85.27 |
| Q6UXI9 | NPNT     | 273  | 1000  |
| Q6YHK3 | CD109    | 118  | 1000  |
| Q6YHK3 | CD109    | 419  | 1000  |
| Q6ZMP0 | THSD4    | 709  | 1000  |
| Q6ZUK4 | TMEM26   | 110  | 52.40 |
| Q7KYR7 | BTN2A1   | 216  | 49.10 |
| Q7KYR7 | BTN2A1   | 222  | 6.59  |
| Q7Z5N4 | SDK1     | 782  | 68.17 |
| Q7Z5N4 | SDK1     | 1767 | 1000  |
| Q86SQ4 | GPR126   | 143  | 1000  |
| Q86SQ4 | GPR126   | 505  | 24.44 |
| Q86UF1 | TSPAN33  | 172  | 4.69  |
| Q86WC4 | OSTM1    | 135  | 1000  |

|        |          |       |        |
|--------|----------|-------|--------|
| Q8IWA5 | SLC44A2  | 187   | 1000   |
| Q8IWA5 | SLC44A2  | 200   | 1000   |
| Q8IWA5 | SLC44A2  | 417   | 132.11 |
| Q8IWT6 | LRRC8A   | 66    | 1000   |
| Q8IWU5 | SULF2    | 171   | 1000   |
| Q8N0Z9 | VSIG10   | 347   | 1000   |
| Q8N271 | PROM2    | 725   | 1000   |
| Q8N3J6 | CADM2    | 291   | 1000   |
| Q8N441 | FGFRL1   | 231   | 1000   |
| Q8N6C5 | IGSF1    | 1223  | 1000   |
| Q8N8Z6 | DCBLD1   | 64    | 47.57  |
| Q8NBN3 | TMEM87A  | 157   | 1000   |
| Q8NBN3 | TMEM87A  | 160   | 1000   |
| Q8NC42 | RNF149   | 131   | 88.82  |
| Q8NCS7 | SLC44A5  | 416   | 1000   |
| Q8NCS7 | SLC44A5  | 425   | 1000   |
| Q8NFZ8 | CADM4    | 67    | 1000   |
| Q8NFZ8 | CADM4    | 262   | 13.38  |
| Q8TAB3 | PCDH19   | 546   | 1000   |
| Q8TB96 | ITFG1    | 353   | 25.17  |
| Q8TB96 | ITFG1    | 371   | 7.71   |
| Q8TC71 | SPATA18  | 495   | 1000   |
| Q8TCT8 | SPPL2A   | 149   | 1000   |
| Q8TCT8 | SPPL2A   | 155   | 1000   |
| Q8WTV0 | SCARB1   | 102   | 59.30  |
| Q8WTV0 | SCARB1   | 108   | 9.34   |
| Q8WWY8 | LIPH     | 357   | 1000   |
| Q8WXI7 | MUC16    | 12416 | 1000   |
| Q92508 | PIEZO1   | 2294  | 1000   |
| Q92508 | PIEZO1   | 2331  | 1000   |
| Q92542 | NCSTN    | 387   | 1000   |
| Q92542 | NCSTN    | 417   | 1000   |
| Q92542 | NCSTN    | 612   | 1000   |
| Q92823 | NRCAM    | 223   | 1000   |
| Q92823 | NRCAM    | 276   | 45.03  |
| Q92823 | NRCAM    | 858   | 28.93  |
| Q92823 | NRCAM    | 1019  | 48.87  |
| Q92854 | SEMA4D   | 379   | 71.75  |
| Q96HA4 | C1orf159 | 104   | 1000   |
| Q96HA4 | C1orf159 | 111   | 1000   |
| Q96HA4 | C1orf159 | 128   | 1000   |

|        |         |      |        |
|--------|---------|------|--------|
| Q96K49 | TMEM87B | 68   | 1000   |
| Q96NT5 | SLC46A1 | 58   | 1000   |
| Q96NY8 | PVRL4   | 281  | 1000   |
| Q96QE2 | SLC2A13 | 433  | 1000   |
| Q96RD7 | PANX1   | 255  | 1000   |
| Q99523 | SORT1   | 162  | 24.44  |
| Q99571 | P2RX4   | 75   | 1000   |
| Q9BXC0 | HCAR1   | 3    | 1000   |
| Q9BY67 | CADM1   | 101  | 1000   |
| Q9BY67 | CADM1   | 113  | 1000   |
| Q9BZC7 | ABCA2   | 1549 | 1000   |
| Q9BZC7 | ABCA2   | 1557 | 1000   |
| Q9BZR6 | RTN4R   | 372  | 1000   |
| Q9C0C4 | SEMA4C  | 106  | 24.44  |
| Q9C0C4 | SEMA4C  | 121  | 1000   |
| Q9C0C4 | SEMA4C  | 522  | 1000   |
| Q9H0U3 | MAGT1   | 71   | 1000   |
| Q9H0X4 | ITFG3   | 116  | 48.87  |
| Q9H0X4 | ITFG3   | 120  | 24.44  |
| Q9H0X4 | ITFG3   | 389  | 1000   |
| Q9H6X2 | ANTXR1  | 184  | 1000   |
| Q9H8M5 | CNNM2   | 112  | 0.00   |
| Q9HC56 | PCDH9   | 450  | 1000   |
| Q9HCN3 | TMEM8A  | 232  | 1000   |
| Q9HCN3 | TMEM8A  | 535  | 1000   |
| Q9HCU4 | CELSR2  | 1032 | 0.00   |
| Q9HCU4 | CELSR2  | 1036 | 20.17  |
| Q9HCU4 | CELSR2  | 1076 | 115.01 |
| Q9HCU4 | CELSR2  | 1565 | 6.59   |
| Q9HCU4 | CELSR2  | 1741 | 1000   |
| Q9HCU4 | CELSR2  | 1900 | 1000   |
| Q9HCU4 | CELSR2  | 2043 | 1000   |
| Q9HCU4 | CELSR2  | 2061 | 1000   |
| Q9HDC9 | APMAP   | 160  | 1000   |
| Q9NPH3 | IL1RAP  | 118  | 1000   |
| Q9NPR2 | SEMA4B  | 405  | 1000   |
| Q9NYQ6 | CELSR1  | 1576 | 1000   |
| Q9NYQ6 | CELSR1  | 1640 | 9.34   |
| Q9NYQ6 | CELSR1  | 1979 | 1000   |
| Q9NYQ6 | CELSR1  | 1982 | 1000   |
| Q9NYQ6 | CELSR1  | 2122 | 1000   |

|          |          |      |       |
|----------|----------|------|-------|
| Q9P055   | JKAMP    | 37   | 1000  |
| Q9P0K1   | ADAM22   | 519  | 16.20 |
| Q9P2B2   | PTGFRN   | 286  | 1000  |
| Q9P2B2   | PTGFRN   | 525  | 24.44 |
| Q9P2B2   | PTGFRN   | 600  | 1000  |
| Q9P2B2   | PTGFRN   | 618  | 1000  |
| Q9UGT4   | SUSD2    | 162  | 1000  |
| Q9UGT4   | SUSD2    | 494  | 1000  |
| Q9UHG3   | PCYOX1   | 323  | 36.70 |
| Q9UHN6   | TMEM2    | 171  | 1000  |
| Q9UHN6   | TMEM2    | 292  | 1000  |
| Q9UHN6   | TMEM2    | 739  | 1000  |
| Q9UHN6   | TMEM2    | 1092 | 1000  |
| Q9UHW9   | SLC12A6  | 398  | 9.34  |
| Q9UIG8   | SLCO3A1  | 153  | 1000  |
| Q9UIW2   | PLXNA1   | 77   | 1000  |
| Q9UIW2   | PLXNA1   | 1043 | 1000  |
| Q9UJ14   | GGT7     | 586  | 4.69  |
| Q9UJW2-2 | TINAG    | 171  | 0.00  |
| Q9UJW2-2 | TINAG    | 175  | 0.00  |
| Q9ULF5   | SLC39A10 | 339  | 45.83 |
| Q9ULI3   | HEG1     | 1080 | 1000  |
| Q9UM47   | NOTCH3   | 1179 | 1000  |
| Q9UN76   | SLC6A14  | 155  | 1000  |
| Q9UN76   | SLC6A14  | 174  | 30.61 |
| Q9UN76   | SLC6A14  | 189  | 1000  |
| Q9UP38   | FZD1     | 231  | 1000  |
| Q9Y4D7   | PLXND1   | 155  | 1000  |
| Q9Y4D7   | PLXND1   | 500  | 48.87 |
| Q9Y4D7   | PLXND1   | 696  | 1000  |
| Q9Y4L1   | HYOU1    | 515  | 1000  |
| Q9Y4L1   | HYOU1    | 869  | 1000  |
| Q9Y4L1   | HYOU1    | 922  | 1000  |
| Q9Y4L1   | HYOU1    | 931  | 1000  |
| Q9Y5L3   | ENTPD2   | 129  | 31.28 |
| Q9Y5Y6   | ST14     | 485  | 1000  |
| Q9Y639   | NPTN     | 197  | 73.31 |
| Q9Y639   | NPTN     | 229  | 1000  |
| Q9Y639   | NPTN     | 276  | 1000  |
| Q9Y639   | NPTN     | 284  | 1000  |
| Q9Y653   | GPR56    | 303  | 1000  |

|        |        |     |       |
|--------|--------|-----|-------|
| Q9Y6M7 | SLC4A7 | 786 | 49.59 |
| Q9Y6M7 | SLC4A7 | 796 | 1000  |

## tes) Identified on 233 Surface Glycoprotein

| ModScore Peptide                    | PPM    | XCorr |
|-------------------------------------|--------|-------|
| K.EGN#STVDCLK.G                     | 4.87   | 3.32  |
| R.ASVDVFGN#R.T                      | 10.03  | 2.054 |
| R.AFALN#CSWR.G                      | -0.48  | 3.091 |
| K.IN#CSDGYIEYYICR.G                 | 0.96   | 3.337 |
| R.TEPGIGPEGNMSTGAPQPN#LMPSN#PDSGMYS | -2.32  | 1.129 |
| R.TEPGIGPEGNMSTGAPQPN#LMPSN#PDSGMYS | -2.32  | 1.129 |
| R.N#ISQVLEK.K                       | -3.2   | 2.697 |
| K.RGPECSQN#YTTPSGVIK.S              | 6.78   | 3.178 |
| K.IGYSNN#GSDWK.M                    | -13.08 | 3.114 |
| R.ALSN#ISLR.L                       | -0.63  | 3.021 |
| R.GGLN#LTAVTVAAEN#NHTVAFLGTS DGR.I  | 0.87   | 8.055 |
| R.GGLN#LTAVTVAAEN#NHTVAFLGTS DGR.I  | 0.87   | 8.055 |
| K.SCVAVTSAQPQN#MSR.R                | 9.26   | 3.729 |
| K.LSHDAN#ETLPLHLYVK.S               | -1.48  | 5.33  |
| R.ISVAGRN#CSFQPER.Y                 | 2.87   | 4.545 |
| R.EAESLQPM*TVVGTDYVFHN#DTK.V        | 2.04   | 4.091 |
| R.GIN#ASSMAWAR.L                    | 5.01   | 3.098 |
| K.RLN#TTGVSAGCTADLLVGR.A            | 2.33   | 3.989 |
| K.LN#TSAGNVDIYKK.L                  | 4.03   | 1.952 |
| K.SFN#ATAERGEEMTFSCR.A              | -0.59  | 5.675 |
| K.M*ILEIAPTS DND FGRYN#CTATNHIGTR.F | 0.24   | 4.667 |
| R.SHGVQTM*VVLNNLEPN#TTYEIR.V        | 4.97   | 5.084 |
| K.YTLDPN#ITSAGPTK.S                 | 1.88   | 1.243 |
| R.GLTCN#R.S                         | -0.81  | 2.149 |
| R.VLEAVN#GTDAR.L                    | 4.46   | 4.084 |
| K.N#LTNIDISK.N                      | 4.33   | 2.972 |
| K.TYN#GTNPDAASR.A                   | -0.81  | 2.461 |
| K.N#QSVPLSCCR.E                     | -0.74  | 1.2   |
| R.QFFSN#CTVDR.V                     | -7.05  | 3.077 |
| R.VQGN#STLLHITDLQAR.D               | 1.69   | 4.761 |
| K.NYN#NTWTR.L                       | -0.53  | 2.341 |
| K.RTLTLVENKPIQLN#CSVK.S             | -1.11  | 6.579 |
| R.LSQAQGN#LSVLETR.Q                 | 0.43   | 4.865 |
| R.QVQLECVVLN#R.T                    | -0.47  | 3.983 |
| K.TVVTYHIPQN#SSENVDSR.Y             | 4.39   | 3.87  |
| R.LFN#VTPQDEQK.F                    | -0.21  | 2.799 |
| K.AATCINPLN#GSVCERPAN#HSAK.Q        | 3.14   | 4.021 |

|                                    |       |       |
|------------------------------------|-------|-------|
| K.AATCINPLN#GSVCERPAN#HSAK.Q       | 3.14  | 4.021 |
| K.CIN#QSICEK.C                     | -4.56 | 2.684 |
| K.CEN#LTTGK.H                      | -2.24 | 2.131 |
| R.N#ATTPLWR.T                      | -9.63 | 1.138 |
| R.CRVPDAAN#LSSAWR.N                | -2.27 | 4.922 |
| R.LATIAN#FSALGLEPGR.D              | 2.93  | 4.507 |
| K.TAVLTAFAN#GR.S                   | -1.78 | 2.845 |
| R.GAN#DSTSAMPEQMK.F                | -1.72 | 2.516 |
| K.VQEHYN#YTK.E                     | -2.51 | 2.909 |
| R.EACQGTSPVVSVCYN#ASDHVYK.G        | -5.27 | 3.541 |
| K.GCFDGN#VTLTAAAN#VTVSLPVR.G       | -0.13 | 6.409 |
| K.GCFDGN#VTLTAAAN#VTVSLPVR.G       | -0.13 | 6.409 |
| R.CNSDLRN#K.T                      | 0.2   | 1.911 |
| K.EIFVAN#GTQGK.L                   | -5.06 | 3.601 |
| R.SVNPN#DTCLASCVK.S                | -3.25 | 2.964 |
| R.N#TTEVVNTMCGYK.T                 | 0.99  | 3.541 |
| R.GYYN#QSEAGSHTVQR.M               | -1.21 | 1.159 |
| K.DFEDLYTPVN#GSIVIVR.A             | 0.56  | 2.965 |
| K.QN#NGAFN#ETLFR.N                 | 4.4   | 1.891 |
| K.QNN#GAFN#ETLFR.N                 | -0.16 | 3.645 |
| R.KQNNGAFN#ETLFR.N                 | 1.25  | 5.659 |
| K.QHTVTTTTKGEN#FTETDVK.M           | 6.35  | 2.63  |
| K.VGVN#GFGR.I                      | -0.2  | 2.949 |
| K.VIPELN#GK.L                      | 0.87  | 2.563 |
| R.GHCWGPQPTQCVN#CSQFLR.G           | -2.68 | 5.416 |
| R.HCLPCHPECQPQN#GSVTCFGPEADQCVACAH | 0.97  | 2.19  |
| K.FPDEEGACQPCPIN#CTHSCVDLDDK.G     | 10.19 | 1.808 |
| R.FKLEWLGN#CSGLNDETYGYK.E          | -0.12 | 6.447 |
| R.VLGFKPKPPKN#ESLETYPVMK.Y         | -0.71 | 4.285 |
| R.AN#LTVVLLRGEK.E                  | -1.47 | 3.902 |
| R.LNPTVITYGN#DSFSAK.A              | 4.86  | 3.526 |
| K.LRN#PCTSEQNCTSPFSYK.N            | -0.96 | 2.176 |
| K.LRNPCTSEQN#CTSPFSYK.N            | 0.64  | 5.07  |
| K.NGVN#GTGENGR.K                   | -0.07 | 4.846 |
| K.NGVN#GTGEN#GR.K                  | -0.26 | 3.854 |
| K.CHEGN#GTFECGACR.C                | -0.14 | 5.269 |
| R.KEN#SSEICSNNGECVCGQCVC.R.K       | 8.68  | 4.45  |
| K.KDTCTQECSYFN#ITK.V               | 3.25  | 5.362 |
| R.GLSPGN#YSVR.I                    | 7.37  | 3.279 |
| R.VYPELPKPSISSN#NSKPVEDK.D         | 8.01  | 3.354 |
| R.LQLSN#GN#R.T                     | -1.16 | 1.866 |

|                                    |        |       |
|------------------------------------|--------|-------|
| R.LQLSN#GN#R.T                     | -1.16  | 1.866 |
| R.TLTLFN#VTR.N                     | 0.34   | 4.171 |
| R.LQLSNDN#R.T                      | -0.55  | 1.819 |
| K.TITVSAELPKPSSISSN#NSKPVEDK.D     | 7.27   | 7.008 |
| R.AYVCGIQNSVVSAN#R.S               | 10.96  | 2.528 |
| K.ITPNNN#GTYACFVSNLATGRN#NSIVK.S   | -0.78  | 6.429 |
| K.ITPNNN#GTYACFVSNLATGRN#NSIVK.S   | -0.78  | 6.429 |
| K.AN#TTQPGIVEGGQVLK.C              | 0.39   | 2.69  |
| K.N#MTISR.G                        | -0.37  | 2.585 |
| K.TEN#QTR.Q                        | -0.18  | 1.754 |
| K.ISSLQTTEKN#DTVAGQGER.D           | -4.45  | 3.974 |
| K.ENQN#HSYSLK.S                    | -0.52  | 2.069 |
| K.GSLSYLN#VTRK.A                   | -7.28  | 3.467 |
| K.TCDWLPKPN#MSASCK.E               | -1.57  | 2.393 |
| K.RACTENNECCHPECLGSCSAPDN#DTACVACR | -0.4   | 6.366 |
| R.N#GSQSMYCIPCEGPCPK.V             | 2.13   | 1.251 |
| K.WNPPSLPNGN#LSYYIVR.W             | 0.54   | 4.138 |
| R.DVMQVAN#TTMSSR.S                 | 0.7    | 3.433 |
| R.LNPGN#YTAR.I                     | -4.85  | 2.671 |
| R.IQATSLSGN#GSWTDPVFFYVQAK.T       | 0.49   | 3.242 |
| K.GSQWSDIEEFCN#RSCEVPTR.L          | 1.05   | 3.758 |
| K.DASSFLAEWQN#ITK.G                | -1.51  | 2.182 |
| K.GFSEDRLLIAGTN#SSDLQQILSLLESNK.D  | 0.01   | 6.299 |
| K.SLVTQYLN#ATGNR.W                 | -0.99  | 4.423 |
| R.SCIN#ESAIDSR.G                   | 1.15   | 2.095 |
| K.GN#LTYGYVTILN#GSDIR.S            | -0.56  | 4.628 |
| K.GN#LTYGYVTILN#GSDIR.S            | -0.56  | 4.628 |
| K.IYLRN#ESEFRDK.L                  | 1.74   | 3.964 |
| K.NLN#NSQSDVVSFR.L                 | 3.55   | 3.183 |
| R.VTGLN#CTTNHPINPK.G               | -7.51  | 3.319 |
| K.NN#HTASILDR.M                    | -7.35  | 3.243 |
| K.NVFN#ETK.N                       | 5.52   | 1.23  |
| K.ARQCN#QTSVCWCVNSVGVR.R           | 1.83   | 3.601 |
| R.HRPTAGAFN#HSDLDAELR.R            | -5.54  | 1.991 |
| R.QN#TSQK.A                        | -0.46  | 2.491 |
| R.DINSQQELQN#ITTDTR.F              | 3.21   | 3.248 |
| K.KKEDALN#ETRESETK.L               | -0.98  | 1.687 |
| R.EIRHN#STGCLR.M                   | -0.41  | 2.335 |
| R.EGFVGNRCDQCEENYFYN#R.S           | -13.98 | 2.337 |
| R.VN#NTLSSQISR.L                   | -4.47  | 3.113 |
| R.RVNDN#K.T                        | -0.1   | 2.963 |

|                                   |       |       |
|-----------------------------------|-------|-------|
| K.N#ATSTK.A                       | 0.3   | 2.415 |
| K.VIEEFYN#QTWVHR.Y                | -0.01 | 5.351 |
| R.SSCGKEN#TSDPSLVIAFGR.G          | 5.33  | 2.631 |
| R.GHTLTLN#FTR.N                   | 0.1   | 2.432 |
| R.KDN#TTVTR.L                     | -1.02 | 2.566 |
| K.TAGVN#TTDK.E                    | -4.51 | 1.335 |
| K.GYPCGGN#K.T                     | -6.38 | 1.725 |
| K.RQQYNALLSN#MSR.I                | -1.96 | 5.973 |
| K.NMQIAN#HTLK.Y                   | -7.84 | 2.8   |
| K.WQM*N#FTVR.Y                    | -4.4  | 1.302 |
| R.YETTN#K.T                       | -0.91 | 2.303 |
| R.LN#SSTIK.Y                      | -0.04 | 2.856 |
| R.VQPFN#VTQGK.Y                   | -1.67 | 2.371 |
| R.LGAELRN#ASLR.M                  | 2.42  | 2.456 |
| R.MN#GSEIQYK.I                    | 4.66  | 2.612 |
| K.AFN#STLPTM*AQMEK.A              | 6.9   | 2.535 |
| R.CSFRDEDDCTYSYTMEGDGAPGPN#STVLVH | 7.35  | 3.042 |
| K.AEMN#GSK.L                      | -0.01 | 2.116 |
| K.QCN#GTSMCWCVNTAGVR.R            | 1.09  | 2.588 |
| K.LSGCQN#ITSTK.C                  | -0.21 | 2.264 |
| K.N#SSGVEER.I                     | 0.01  | 2.412 |
| K.LNLQTSTSIPN#VTEM*K.T            | -2.28 | 2.647 |
| R.YFFN#VSDEAALLEK.A               | -0.29 | 2.934 |
| R.AN#YTGQIVLYSVN#ENGNITVIQHR.G    | -0.63 | 3.442 |
| R.AN#YTGQIVLYSVN#ENGNITVIQHR.G    | -0.63 | 3.442 |
| R.AN#YTGQIVLYSVNENGN#ITVIQHR.G    | 0.28  | 3.464 |
| R.TASCSN#VTCWLK.D                 | -1.54 | 2.497 |
| K.CHAGYIGDNCN#CSTDISTCR.G         | 0.17  | 3.199 |
| K.EVEVN#SSK.C                     | -1.37 | 1.73  |
| K.RN#STSIYFK.M                    | 2.25  | 2.882 |
| K.RLKPLFN#K.S                     | -5.21 | 2.999 |
| R.EAGN#HTSGAGLVQINK.S             | -8.67 | 4.574 |
| K.CVN#ASR.C                       | -0.69 | 1.815 |
| K.LDN#YSTQELGK.T                  | -0.97 | 3.094 |
| K.NLN#VTSLGFR.S                   | -0.92 | 3.99  |
| K.VCDPLCSSGGCWGPGPGQCLSCRN#YSR.G  | -2.16 | 2.42  |
| K.YPDVQNECRPCHEN#CTQGCK.G         | -0.36 | 2.047 |
| R.QVLN#ITDK.D                     | 1.39  | 3.322 |
| K.M*N#ASFSLK.S                    | -3.23 | 1.662 |
| K.MYN#GSVPFEER.I                  | 3.1   | 3.054 |
| R.N#LSCREPNQHFKPYLK.H             | 9.54  | 4.137 |

|                                     |        |       |
|-------------------------------------|--------|-------|
| K.QLSCVANQN#GSQADCELGNPFKR.N        | -4.33  | 5.699 |
| R.KYQTLN#CSVNVNCVNIR.C              | 3.98   | 2.426 |
| K.TVTSASNN#ETYCR.S                  | -1.28  | 2.117 |
| R.CKPNFFCN#STVCEHCDPCTK.C           | 0.7    | 4.539 |
| K.N#ITIVTGAPR.H                     | 0.17   | 3.919 |
| R.RN#ITLAYTLEADRDR.R                | -0.77  | 5.825 |
| R.TSIPTINMEN#K.T                    | -2.3   | 2.883 |
| R.N#CSCQCEDNRGPK.G                  | 0.28   | 2.234 |
| K.GFCEAPGN#R.T                      | -7.98  | 2.143 |
| K.LNKPFLFDTKPLIVQYEVNFQN#GIECGGAYVK | -0.39  | 3.89  |
| K.ELSEYN#ATAIK.S                    | -5.29  | 3.002 |
| R.GYYN#QSEAGSHTLQR.M                | -0.29  | 4.116 |
| K.NWQLTEEDFGN#TSGR.L                | -0.04  | 2.779 |
| R.LCLNN#DTK.E                       | 9.7    | 2.979 |
| R.MQQLPAYQGEGPYCN#R.T               | 1.49   | 2.27  |
| R.VTYQNHN#K.T                       | -0.2   | 2.176 |
| K.VPGN#QTSTTLK.L                    | 2.8    | 2.333 |
| R.GYN#VTYWR.E                       | 1.3    | 3.412 |
| R.SFDDHFQHLLN#DSER.T                | 5.22   | 4.966 |
| K.ILLTCSLN#DSATEVTGHR.W             | -1.22  | 1.304 |
| K.ALMN#GSESR.F                      | 0.01   | 3.127 |
| R.CN#GTSSK.G                        | -7.03  | 2.641 |
| K.AGHFQN#TSSPSAR.C                  | -7.83  | 1.642 |
| K.EQYTIIN#R.T                       | -4.4   | 2.572 |
| K.N#LSCIVNEGK.K                     | -3.76  | 2.57  |
| K.SHLQN#YTVN#ATK.L                  | 4.99   | 2.858 |
| K.SHLQN#YTVN#ATK.L                  | 4.99   | 2.858 |
| K.HLLEN#STASVSEAERK.A               | 8.47   | 5.33  |
| R.ACM*N#ETRIEELR.A                  | -1.57  | 2.962 |
| K.NSN#SNVIQVDQSGGLPSR.D             | -2.84  | 3.125 |
| R.DYYLN#K.T                         | -12.46 | 1.769 |
| R.FFN#FSWR.V                        | -1.47  | 3.214 |
| K.N#SSVEAFKR.Q                      | -10.34 | 1.519 |
| K.RQTECMVEQYSN#YSVNGEPVNGR.H        | -1.01  | 2.465 |
| K.RQTECMVEQYSN#YSVNGEPVN#GR.H       | -11.61 | 3.281 |
| K.RYHQPGEAVTSAVDQLQQEFHCCGSN#NSQI   | -0.48  | 3.721 |
| K.RYHQPGEAVTSAVDQLQQEFHCCGSNN#SQI   | 0.46   | 3.773 |
| R.WCPQNSSCVN#ATACR.C                | 5.6    | 1.137 |
| K.TFKN#ESENTCQDVDECQQNPR.L          | -8.25  | 4.643 |
| R.GDKN#VTMGQSSAR.M                  | -0.06  | 3.775 |
| R.SLSN#STAR.N                       | -2.18  | 2.598 |

|                                |       |       |
|--------------------------------|-------|-------|
| R.TQN#FTLLVQGSPELK.T           | -1.17 | 2.882 |
| K.LCDYEN#RFNTSK.G              | 3.12  | 3.37  |
| K.LCDYENRFN#TSK.G              | 3.49  | 3.888 |
| K.LAPN#LTEL.R.A                | 2.96  | 4.017 |
| K.N#ISASAR.E                   | -7.97 | 2.606 |
| R.TCN#ASQGFKR.W                | -2.16 | 2.606 |
| K.N#VSCLWCNTN.K.A              | 1.51  | 2.687 |
| K.FLKPYTLEEQKN#LTVCPDGALFEQK.G | -3.07 | 5.567 |
| K.KLHVGYLQPLVAVQVSFAPN#NTGK.E  | 0.29  | 4.979 |
| R.DATGNVN#DTIVTELTN#CTSAACK.L  | 0.03  | 1.956 |
| R.DATGNVN#DTIVTELTN#CTSAACK.L  | 0.03  | 1.956 |
| R.N#TSAASTAQLVEATEELRR.E       | 2.14  | 4.868 |
| K.ETN#FSLASGLEAK.D             | 0.16  | 3.123 |
| K.GN#NCLDAAK.A                 | -1.05 | 2.992 |
| K.SN#VSGNTHLCISNGNYEK.E        | 2.84  | 5.143 |
| R.DDFFGHYACDQNGN#K.T           | -3.32 | 3.022 |
| K.VVVVDGKN#ESEYTVK.W           | -0.51 | 2.915 |
| K.MFSN#CSK.Q                   | 8     | 2.096 |
| K.CQEAIN#ATCK.G                | -0.63 | 1.927 |
| R.EQQLASCACNETDN#SCK.V         | -2.62 | 1.256 |
| R.ALVN#FTR.S                   | -0.52 | 2.28  |
| R.AN#YTILK.G                   | -1.99 | 2.187 |
| K.CCN#TTK.C                    | -9.81 | 1.54  |
| R.DGYEPCVNEGMCVTYHN#GTGYCK.C   | 3.06  | 4.005 |
| R.CDMDGQN#R.T                  | -0.56 | 2.946 |
| R.AVN#SSCR.A                   | -0.4  | 2.667 |
| R.TCVSN#CTASQFVCK.N            | -5.02 | 1.829 |
| K.QSGDVTCN#CTDGR.V             | -1.03 | 3.335 |
| K.N#GTDEK.F                    | -0.3  | 1.656 |
| K.GRDIYTFDGALN#K.S             | 6.97  | 2.804 |
| K.SDAVSHTGN#YTCEVTELTR.E       | -0.2  | 1.547 |
| K.AALSWSNGN#GTASCR.V           | 6.85  | 3.402 |
| R.YN#ATVYSQAAN#GTEGQPQAIEFR.T  | -0.36 | 2.438 |
| R.YN#ATVYSQAAN#GTEGQPQAIEFR.T  | -0.36 | 2.438 |
| K.VSDN#ESSN#YTYK.I             | 0.84  | 1.217 |
| K.VSDN#ESSN#YTYK.I             | 0.84  | 1.217 |
| K.IHVAGETDSSNLN#VSEPR.A        | -8.93 | 3.726 |
| R.SAN#ASFNIK.W                 | -9.83 | 2.452 |
| R.VTRDDAGN#YTCIASN#GPQGQIR.A   | -4.53 | 2.612 |
| R.VTRDDAGN#YTCIASN#GPQGQIR.A   | -4.53 | 2.612 |
| R.KVEAEALN#ATAIR.V             | -0.96 | 5.051 |

|                                       |       |       |
|---------------------------------------|-------|-------|
| R.YGEN#NSLSVEGFRK.L                   | 0.83  | 2.747 |
| R.KTN#ESVSEPRK.G                      | -1    | 3.348 |
| R.NTNENPQECFN#ASK.L                   | 0.89  | 1.476 |
| K.LLTSHGM*GIQVPLN#ATEFNLYLCPAIINQIDAR | 0.35  | 4.372 |
| K.YRDFQHLLN#R.T                       | -1.1  | 5.273 |
| K.TCIMEASTDFLPLNFSN#CSR.R             | 2.09  | 2.398 |
| R.N#LTEVPTDLPAYVR.N                   | -0.36 | 4.5   |
| R.N#LTHLESLHLEDNALK.V                 | -2.04 | 4.019 |
| K.VLHN#GTLAELQGLPHIR.V                | -1.29 | 6.943 |
| R.LNLSEN#YTLSISNAR.I                  | -0.09 | 4.615 |
| K.LGDCISEDSPDGN#ITWYR.N               | 0.19  | 1.836 |
| K.EGDN#ITLK.C                         | -5.52 | 3.244 |
| R.RN#ATGDYK.C                         | -0.08 | 2.004 |
| R.N#ATVVWM*K.D                        | 2.87  | 2.184 |
| K.IISPEEN#VTLTCTAENQLER.T             | -0.04 | 5.09  |
| R.TVNSLN#VSANENR.E                    | -8.7  | 3.44  |
| K.LAFAFGDRN#CSTITLQN#ITR.G            | -0.1  | 5.731 |
| K.KLAFAFGDRN#CSTITLQN#ITR.G           | 0.5   | 7.236 |
| K.IN#ATDADEPNTLNSK.I                  | 9.63  | 2.722 |
| R.YVQN#GTYYTVK.I                      | -0.82 | 3.135 |
| R.LAGAGN#STAR.I                       | 1.3   | 2.375 |
| K.NDRN#SSDETFLK.D                     | -1.04 | 4.386 |
| R.GN#VTQHVQGHR.N                      | -0.48 | 4.271 |
| K.STN#GSK.Q                           | -0.56 | 2.297 |
| R.NPN#GTVTVISR.Y                      | 3.59  | 2.543 |
| K.GVEAQN#R.T                          | -0.73 | 2.729 |
| R.RIAVDWESLGYN#ITR.C                  | 0.2   | 3.506 |
| R.GHN#ESK.A                           | -0.87 | 1.262 |
| K.APQHVVNHLPPYTN#VSLK.M               | 4.15  | 4.717 |
| K.FIN#CTK.I                           | 1.12  | 2.373 |
| K.MEDGLLTCHGPGPDN#CTK.C               | -5.24 | 3.912 |
| R.SYSTTYEERN#ITGTR.V                  | -0.01 | 3.04  |
| K.ENLPGDPTSN#ATSR.G                   | -0.71 | 2.048 |
| K.QPVSPVIHPPVSYN#DTAPR.I              | 3     | 4.337 |
| K.GQTEIQVNCPPAVTEN#K.T                | 1.8   | 2.118 |
| R.N#ITLWTR.Q                          | -3.88 | 2.899 |
| R.AKPQGQWAEDVLGN#K.T                  | -0.52 | 4.526 |
| R.VCEIHEDN#STR.S                      | -2.94 | 2.672 |
| R.TVPPMVN#VTR.S                       | 1.76  | 2.716 |
| R.SEASEGN#ITVTCR.A                    | -0.59 | 3.427 |
| R.IRQGN#YSAGLPR.G                     | -6.27 | 5.439 |

|                                  |        |       |
|----------------------------------|--------|-------|
| R.GAYRVN#ITYNYPVR.A              | -0.77  | 3.865 |
| K.NIN#GTDPIQK.Y                  | -9.45  | 2.943 |
| K.GNPYSDLGN#HTTCR.Y              | -0.19  | 1.937 |
| K.N#VTNQIALLK.L                  | -2.16  | 2.875 |
| K.NNFN#CTR.R                     | -8.06  | 2.231 |
| R.VISAGGN#DSR.S                  | -0.1   | 2.574 |
| R.CEPTFVN#TSR.S                  | -7.23  | 1.94  |
| R.KN#SSQAR.D                     | -1.1   | 2.034 |
| K.ATVSIN#DSVSDLPK.M              | 6.64   | 1.987 |
| R.STNN#NTK.F                     | -0.77  | 3.064 |
| K.VLGQSQEPNVNPASAGN#QTQK.T       | 5.47   | 1.719 |
| K.TFLHYDCGN#K.T                  | -10.72 | 1.868 |
| K.QLVHSFAEGQDQGSAYAN#R.T         | 2.17   | 2.435 |
| R.TALFPDLLAQGN#ASLR.L            | 1.5    | 5.566 |
| R.VVLGAN#GTYSCLVR.N              | 0.3    | 2.795 |
| K.QLVHSFTEGRDQGSAYAN#R.T         | -3.7   | 1.198 |
| K.QVLAN#K.S                      | -0.67  | 2.576 |
| R.LHEITN#ETFR.G                  | -9.01  | 3.166 |
| K.KLN#VTTAWK.A                   | -2.86  | 5.72  |
| R.LYGYSLGN#ISSNLISFTEVDDAETLHK.S | -1.24  | 5.844 |
| K.DLVVQQLVN#VSRGN#TSGVLVVLTK.F   | 4.99   | 5.128 |
| R.GN#TSGVLVVLTK.F                | -0.15  | 2.826 |
| K.YVIN#GTIAN#ETK.L               | 1.07   | 3.314 |
| K.YVIN#GTIAN#ETK.L               | 1.07   | 3.314 |
| K.DN#GTFSCAVK.N                  | 8.75   | 1.289 |
| K.EVPRN#DTCPELPPPEWGWR.T         | -1.57  | 3.722 |
| K.TNN#STCQPCPYGSYSN#GSDCTR.C     | -0.01  | 3.634 |
| K.TNN#STCQPCPYGSYSN#GSDCTR.C     | -0.01  | 3.634 |
| K.GN#GTILK.G                     | -4.19  | 1.694 |
| R.TQDEILFSN#STR.L                | -12.96 | 4.452 |
| K.IN#YTVPQSGTFK.I                | 5.3    | 2.83  |
| R.QVYAN#R.S                      | -1.52  | 1.831 |
| R.KEDFN#QTLTSNEQTSR.A            | -7.52  | 2.082 |
| R.N#MSCSIN#NTLLGQKK.E            | -0.22  | 3.51  |
| R.N#MSCSIN#NTLLGQKK.E            | -0.22  | 3.51  |
| R.TN#QSIMVQWQPPPETEHNGVLR.G      | -1.17  | 4.652 |
| K.N#LTSHTK.Y                     | -0.18  | 2.172 |
| K.GFN#ASYIR.V                    | -10.84 | 1.257 |
| K.NN#ESLDEGLR.L                  | -1.11  | 3.951 |
| K.DWSQNMYSFN#CSEDNPSRER.C        | 0.99   | 2.286 |
| R.AAGN#TSESQSCAR.S               | -1.39  | 4.373 |

|                                     |        |       |
|-------------------------------------|--------|-------|
| K.GVLMVGN#ETTYEDGHGSRKN#ITDLVEGAK.] | -4.11  | 6.921 |
| K.N#ITDLVEGAK.K                     | -1.49  | 4.297 |
| K.TCNPETFPSSN#ESR.Q                 | -0.39  | 5.22  |
| K.DSCN#DSFR.G                       | -0.54  | 1.672 |
| R.FYN#YTLCR.N                       | -1.83  | 2.678 |
| R.N#LTQPEVIIQPSSR.H                 | 4.47   | 3.186 |
| R.N#VSECFLAR.E                      | 4.18   | 3.001 |
| K.TDN#GTYR.C                        | -7.85  | 1.148 |
| R.AGAIN#ATYK.V                      | 0.34   | 2.026 |
| K.GIGN#YSCSYR.L                     | 3.92   | 3.921 |
| K.NYPGTYPN#HTVCEK.T                 | -1.49  | 3.474 |
| K.QEAKEN#GTN#LTFIGDK.T              | -2.12  | 2.754 |
| K.QEAKEN#GTN#LTFIGDK.T              | -2.12  | 2.754 |
| R.RN#ASAVVLYNEER.Y                  | -1.43  | 3.508 |
| K.VIAPGGHCIHEN#QTCDPEIFN#TTEIAK.A   | -2.24  | 2.922 |
| K.VIAPGGHCIHEN#QTCDPEIFN#TTEIAK.A   | -2.24  | 2.922 |
| R.QLFFN#GTR.A                       | 5.58   | 3.834 |
| R.WNRGN#ESLPER.A                    | -6.15  | 2.26  |
| K.DGGLPSLQSN#ATVR.V                 | -2.29  | 2.812 |
| K.N#TSGSNQQAFLLENVPCNN#ASCEEARR.M   | 4.96   | 4.006 |
| K.N#TSGSNQQAFLLENVPCNN#ASCEEARR.M   | 4.96   | 4.006 |
| K.GEAVTRRGAFWN#SVRSVSR.C            | 1.28   | 1.26  |
| K.DFRDM*N#QTLGDN#ITVK.M             | 1.99   | 2.338 |
| K.DFRDM*N#QTLGDN#ITVK.M             | 1.99   | 2.338 |
| K.SN#ITFNNN#DTVSFLEYR.T             | -0.21  | 3.848 |
| K.SN#ITFNNN#DTVSFLEYR.T             | -0.21  | 3.848 |
| K.AGN#TTESK.I                       | -1.15  | 2.227 |
| R.KFN#TTER.V                        | -1.21  | 1.693 |
| R.ELYN#GTADITLR.F                   | 8.46   | 3.79  |
| K.HMLALAPN#STAR.R                   | 0.68   | 2.759 |
| R.TSLELWM*HTDPVSQKN#ESVR.N          | 0.06   | 4.161 |
| K.SGAGVPAVILRRPN#QSQPLPPSSLQR.F     | -3.68  | 3.199 |
| K.DLYEYSWVQGPLHSN#ETDRLPR.C         | -1.4   | 4.717 |
| R.FN#HTQTIQQK.Q                     | -0.59  | 2.989 |
| R.ERPPTFLTPEGN#ASNK.E               | 0.96   | 4.873 |
| R.VNVVN#STLAEVHWDVPVPLK.S           | -0.39  | 4.496 |
| K.NLN#FSTR.Y                        | -2.53  | 2.794 |
| R.AAN#YTSSLNLPDK.T                  | 4.88   | 1.967 |
| R.CGN#GTLPAYN#GSECR.S               | -10.61 | 1.394 |
| R.CGN#GTLPAYN#GSECR.S               | -10.61 | 1.394 |
| R.SFAGPGAPFPMN#R.S                  | 2.9    | 3.621 |

|                                |       |       |
|--------------------------------|-------|-------|
| K.TMFN#STDIK.L                 | 0.87  | 2.068 |
| R.FSADLGYN#GTR.Q               | -0.92 | 4.065 |
| K.CLSEQPPPSYN#WTR.L            | -1.95 | 4.038 |
| R.ITFKPIAPSGQN#ATCTR.Y         | 4.28  | 2.757 |
| K.SGILRN#DSTVPDQFQCK.L         | 4.29  | 2.752 |
| K.DITDLIN#NTFIR.T              | 0.92  | 4.376 |
| K.GVAVTN#TSK.L                 | -0.69 | 2.117 |
| -.M*YN#GSCCR.I                 | 0.27  | 1.368 |
| R.FQLLN#FSSSELK.V              | -0.34 | 3.41  |
| K.VSLTN#VSISEGR.Y              | 5.67  | 4.015 |
| K.SPAN#GSLGPTLN#LSSGESR.L      | 0.25  | 2.898 |
| K.SPAN#GSLGPTLN#LSSGESR.L      | 0.25  | 2.898 |
| K.GRVPPGDSPPGN#GSGPR.H         | 0.06  | 1.254 |
| K.NN#QTECFNFIR.F               | 3.55  | 4.095 |
| R.FLQPYN#ASHLYVCGTYAFQPK.C     | 0.99  | 3.67  |
| R.DPYCAWSVN#TSR.C              | -2.13 | 3.738 |
| K.APPRN#YSVIVMFTALQLHR.Q       | -0.05 | 7.212 |
| K.NTN#SSNN#FSR.S               | -7.53 | 3.892 |
| K.NTN#SSNN#FSR.S               | -7.53 | 3.892 |
| R.YKPDTLAVAVEN#GTGTDR.Q        | -0.21 | 2.305 |
| K.DFN#ETQLAR.I                 | -5.5  | 1.936 |
| R.VYGQNINN#ETWSR.I             | -4.08 | 3.48  |
| K.IVASDSGKPSLN#QTALVR.V        | 1.97  | 3.632 |
| R.DCVSN#GSLGCPVR.L             | -8.69 | 1.12  |
| R.GWSC TDN#STAQTVAQQR.A        | 0.3   | 2.113 |
| R.LLDRNDNPPVLGNFEILFNN#YVTNR.S | 0.27  | 6.704 |
| R.LLDRNDNPPVLGNFEILFNNYVTN#R.S | 0.53  | 9.089 |
| R.GNELSLVLLN#ASTGELK.L         | 2.56  | 4.733 |
| R.HIDM*ADFIANN#GTVPGCPAK.K     | 7.41  | 2.113 |
| R.LHGLHLSN#ITVGGIPGPAGGVAR.G   | -1.95 | 4.327 |
| K.GFDPDCN#K.T                  | -6.28 | 2.261 |
| R.LQRN#ESGLDSGR.S              | -0.29 | 4.394 |
| R.N#ATQHTAGYFGSDVK.V           | -4.54 | 4.304 |
| R.AGPN#GTLFVADAYK.G            | -1.93 | 2.983 |
| R.N#TTYCSK.V                   | -0.83 | 2.247 |
| R.KIN#SSLQLPDR.V               | -3.9  | 3.703 |
| K.DIGN#YSCAAQGTQTGSKK.S        | 2.14  | 4.152 |
| K.NVDMAGFIANN#GTR.E            | 3.73  | 3.286 |
| K.GFDPDCN#KTN#GQCQCK.E         | 3.51  | 1.204 |
| K.GFDPDCN#KTN#GQCQCK.E         | 3.51  | 1.204 |
| K.LSRN#ETQVDGAR.A              | -0.7  | 1.904 |

|                                     |        |       |
|-------------------------------------|--------|-------|
| K.N#GSTEIYGECGVCPR.G                | -2.25  | 1.819 |
| R.ETCSGN#SSQCAPNIHK.M               | 0.41   | 1.053 |
| K.N#VSVAEGK.E                       | -0.34  | 3.152 |
| K.QRN#NSWVK.S                       | -7.53  | 2.158 |
| R.YSVLIMAIEKPVGDLSSPN#ETK.Y         | 0.03   | 4.472 |
| K.LEN#WTDASR.V                      | 4.43   | 1.804 |
| K.SELVN#ETR.W                       | -8.16  | 2.751 |
| R.AQPGTMSN#GTETR.G                  | -0.77  | 2.699 |
| K.M*SN#ITFLNFDPPIEEFHQYYQHIVTTLVK.G | -2.02  | 5.969 |
| K.DGSRN#ITLR.T                      | 3.15   | 1.923 |
| K.ILESERFDTHEYRN#ESR.R              | 7.31   | 3.252 |
| K.TTN#SSAADPR.E                     | -0.34  | 3.322 |
| R.QN#GSLSK.I                        | -0.75  | 1.936 |
| K.EINN#MTVPSK.L                     | 1.08   | 2.739 |
| R.WGAEGRDVCAAN#GSGGDEGPDPDLICR.N    | 3.2    | 2.711 |
| K.LSGN#LTLLR.A                      | -0.7   | 3.744 |
| K.YN#YTEDPTILR.I                    | -2.66  | 2.365 |
| R.GLSGLTQVLLNVLTLNRN#LSDSLAR.G      | 0.5    | 7.439 |
| R.LGTLPPSPMLLSM*NEMTLVSHACYPLFKDQNi | -4.15  | 2.065 |
| R.LGTLPPSPMLLSM*NEMTLVSHACYPLFKDQNi | -4.15  | 2.065 |
| K.DLNEDDHHHECLN#VTQLLK.Y            | 1.09   | 2.63  |
| K.RTFLN#TTVEK.H                     | 0.96   | 3.459 |
| R.CLHN#GTCVDLVGGFR.C                | 1.16   | 5.129 |
| K.N#CSSWSDK.N                       | 4.38   | 2.025 |
| R.SPIVTHCN#VSTVNK.G                 | -4.87  | 4.067 |
| K.GIQEIIQM*N#K.S                    | 9.01   | 1.714 |
| K.FPVHGAGELCVGQN#TSDK.G             | 4      | 3.437 |
| R.RRGN#ISAVAVR.F                    | -7.17  | 3.182 |
| K.INLN#ESMQVVS.R                    | 6.55   | 4.349 |
| K.AN#FTIYDCSR.T                     | -0.72  | 3.349 |
| R.VFGSQN#LTTVK.L                    | -4.82  | 3.61  |
| K.N#ATLAEQAK.L                      | 0.9    | 2.771 |
| K.DKN#GTRAEPPLN#ASASDQGEK.V         | -0.44  | 3.591 |
| K.DKN#GTRAEPPLN#ASASDQGEK.V         | -0.44  | 3.591 |
| R.LLN#LTNPEASTSVLMAVTHTLTQYPFDFR.G  | -0.43  | 5.059 |
| R.CDGWADCTDHSDELN#CSCDAGHQFTCK.N    | 4.96   | 4.449 |
| K.N#ASNMEYR.I                       | -0.18  | 3.03  |
| K.AN#ATIEVK.A                       | -1.06  | 2.602 |
| K.EN#GMPMDIVN#TSGR.F                | 1.78   | 3.222 |
| K.EN#GMPMDIVN#TSGR.F                | 1.78   | 3.222 |
| K.N#SSQVLGEK.V                      | -10.24 | 2.789 |

K.DN#ITAHNISWR.N  
R.N#LTVSECK.K

9.44      3.883  
7.06      2.652

## s in Expt# 1

---

### Annotation

---

---

ANO9\_HUMAN Anoctamin-9  
F1712\_HUMAN Protein FAM171A2  
CA233\_HUMAN Fibronectin type-III domain-containing transmembrane protein C1orf233  
LPP1\_HUMAN Lipid phosphate phosphohydrolase 1  
ARI1A\_HUMAN AT-rich interactive domain-containing protein 1A  
ARI1A\_HUMAN AT-rich interactive domain-containing protein 1A  
ADA10\_HUMAN Disintegrin and metalloproteinase domain-containing protein 10  
NRP1\_HUMAN Neuropilin-1  
NRP1\_HUMAN Neuropilin-1  
PLXB2\_HUMAN Plexin-B2  
LAMA5\_HUMAN Laminin subunit alpha-5  
LAMA5\_HUMAN Laminin subunit alpha-5  
TMPS2\_HUMAN Transmembrane protease serine 2  
NCAM2\_HUMAN Neural cell adhesion molecule 2  
NCAM2\_HUMAN Neural cell adhesion molecule 2  
NCAM2\_HUMAN Neural cell adhesion molecule 2  
PLXB1\_HUMAN Plexin-B1  
GPR39\_HUMAN G-protein coupled receptor 39  
MPZL2\_HUMAN Myelin protein zero-like protein 2  
TLR2\_HUMAN Toll-like receptor 2  
TSN3\_HUMAN Tetraspanin-3  
TSN3\_HUMAN Tetraspanin-3  
RAMP3\_HUMAN Receptor activity-modifying protein 3  
IGSF3\_HUMAN Immunoglobulin superfamily member 3  
ICOSL\_HUMAN ICOS ligand  
ICOSL\_HUMAN ICOS ligand  
ATRN\_HUMAN Attractin

ATRN\_HUMAN Attractin  
ATRN\_HUMAN Attractin  
ATRN\_HUMAN Attractin  
TSN9\_HUMAN Tetraspanin-9  
S22A5\_HUMAN Solute carrier family 22 member 5  
S22A5\_HUMAN Solute carrier family 22 member 5  
ACL6B\_HUMAN Actin-like protein 6B  
PRS23\_HUMAN Serine protease 23  
S1PR2\_HUMAN Sphingosine 1-phosphate receptor 2  
LYPD3\_HUMAN Ly6/PLAUR domain-containing protein 3  
MPZL1\_HUMAN Myelin protein zero-like protein 1  
TSN13\_HUMAN Tetraspanin-13  
TSN15\_HUMAN Tetraspanin-15  
1A02\_HUMAN HLA class I histocompatibility antigen, A-2 alpha chain  
TFR1\_HUMAN Transferrin receptor protein 1  
PRIO\_HUMAN Major prion protein  
G3P\_HUMAN Glyceraldehyde-3-phosphate dehydrogenase  
G3P\_HUMAN Glyceraldehyde-3-phosphate dehydrogenase  
ERBB2\_HUMAN Receptor tyrosine-protein kinase erbB-2  
ERBB2\_HUMAN Receptor tyrosine-protein kinase erbB-2  
ERBB2\_HUMAN Receptor tyrosine-protein kinase erbB-2  
AT1B1\_HUMAN Sodium/potassium-transporting ATPase subunit beta-1  
AT1B1\_HUMAN Sodium/potassium-transporting ATPase subunit beta-1  
ICAM1\_HUMAN Intercellular adhesion molecule 1  
ICAM1\_HUMAN Intercellular adhesion molecule 1  
ITB1\_HUMAN Integrin beta-1  
INSR\_HUMAN Insulin receptor  
CEAM5\_HUMAN Carcinoembryonic antigen-related cell adhesion molecule 5  
CEAM5\_HUMAN Carcinoembryonic antigen-related cell adhesion molecule 5

CEAM5\_HUMAN Carcinoembryonic antigen-related cell adhesion molecule 5  
CEAM5\_HUMAN Carcinoembryonic antigen-related cell adhesion molecule 5  
CEAM5\_HUMAN Carcinoembryonic antigen-related cell adhesion molecule 5  
CEAM5\_HUMAN Carcinoembryonic antigen-related cell adhesion molecule 5  
CEAM5\_HUMAN Carcinoembryonic antigen-related cell adhesion molecule 5  
CEAM5\_HUMAN Carcinoembryonic antigen-related cell adhesion molecule 5  
CEAM5\_HUMAN Carcinoembryonic antigen-related cell adhesion molecule 5  
ITAV\_HUMAN Integrin alpha-V  
CATD\_HUMAN\_contaminant Cathepsin D  
SAP\_HUMAN Prosaposin  
IGF1R\_HUMAN Insulin-like growth factor 1 receptor  
DAF\_HUMAN Complement decay-accelerating factor  
4F2\_HUMAN 4F2 cell-surface antigen heavy chain  
4F2\_HUMAN 4F2 cell-surface antigen heavy chain  
4F2\_HUMAN 4F2 cell-surface antigen heavy chain  
NEP\_HUMAN Neprilysin  
ITA5\_HUMAN Integrin alpha-5  
CD63\_HUMAN CD63 antigen  
CSF1\_HUMAN Macrophage colony-stimulating factor 1  
TACD2\_HUMAN Tumor-associated calcium signal transducer 2  
TACD2\_HUMAN Tumor-associated calcium signal transducer 2  
TACD2\_HUMAN Tumor-associated calcium signal transducer 2  
PTPRF\_HUMAN Receptor-type tyrosine-protein phosphatase F  
CLUS\_HUMAN Clusterin  
CLUS\_HUMAN Clusterin  
LAMC1\_HUMAN Laminin subunit gamma-1  
LAMC1\_HUMAN Laminin subunit gamma-1  
LAMC1\_HUMAN Laminin subunit gamma-1

LAMC1\_HUMAN Laminin subunit gamma-1  
GTR1\_HUMAN Solute carrier family 2, facilitated glucose transporter member 1  
LAMP1\_HUMAN Lysosome-associated membrane glycoprotein 1  
LAMP1\_HUMAN Lysosome-associated membrane glycoprotein 1  
LAMP1\_HUMAN Lysosome-associated membrane glycoprotein 1  
FGFR1\_HUMAN Fibroblast growth factor receptor 1  
MPRI\_HUMAN Cation-independent mannose-6-phosphate receptor  
ACE\_HUMAN Angiotensin-converting enzyme  
ACE\_HUMAN Angiotensin-converting enzyme  
LAMP2\_HUMAN Lysosome-associated membrane glycoprotein 2  
PVR\_HUMAN Poliovirus receptor  
INGR1\_HUMAN Interferon gamma receptor 1  
CD44\_HUMAN CD44 antigen  
ITB4\_HUMAN Integrin beta-4  
EPCAM\_HUMAN Epithelial cell adhesion molecule  
EPCAM\_HUMAN Epithelial cell adhesion molecule  
INAR1\_HUMAN Interferon alpha/beta receptor 1  
INAR1\_HUMAN Interferon alpha/beta receptor 1  
ITA2\_HUMAN Integrin alpha-2  
ITB5\_HUMAN Integrin beta-5  
ITB6\_HUMAN Integrin beta-6  
LFA3\_HUMAN Lymphocyte function-associated antigen 3  
MPRD\_HUMAN Cation-dependent mannose-6-phosphate receptor  
MPRD\_HUMAN Cation-dependent mannose-6-phosphate receptor  
5NTD\_HUMAN 5'-nucleotidase  
5NTD\_HUMAN 5'-nucleotidase  
ERBB3\_HUMAN Receptor tyrosine-protein kinase erbB-3  
ERBB3\_HUMAN Receptor tyrosine-protein kinase erbB-3  
ERBB3\_HUMAN Receptor tyrosine-protein kinase erbB-3  
CADH3\_HUMAN Cadherin-3  
ENPP1\_HUMAN Ectonucleotide pyrophosphatase/phosphodiesterase family member 1  
ENPP1\_HUMAN Ectonucleotide pyrophosphatase/phosphodiesterase family member 1  
ENPP1\_HUMAN Ectonucleotide pyrophosphatase/phosphodiesterase family member 1

ITA6\_HUMAN Integrin alpha-6  
ITA6\_HUMAN Integrin alpha-6  
ACKR3\_HUMAN Atypical chemokine receptor 3  
TNR6\_HUMAN Tumor necrosis factor receptor superfamily member 6  
ITA3\_HUMAN Integrin alpha-3  
ITA3\_HUMAN Integrin alpha-3  
ITA3\_HUMAN Integrin alpha-3  
ITB8\_HUMAN Integrin beta-8  
CD82\_HUMAN CD82 antigen  
CALX\_HUMAN Calnexin  
EPHB2\_HUMAN Ephrin type-B receptor 2  
1B15\_HUMAN HLA class I histocompatibility antigen, B-15 alpha chain  
CTR1\_HUMAN High affinity cationic amino acid transporter 1  
CTR1\_HUMAN High affinity cationic amino acid transporter 1  
CALCR\_HUMAN Calcitonin receptor  
L1CAM\_HUMAN Neural cell adhesion molecule L1  
L1CAM\_HUMAN Neural cell adhesion molecule L1  
L1CAM\_HUMAN Neural cell adhesion molecule L1  
GPC1\_HUMAN Glypican-1  
BASI\_HUMAN Basigin  
BASI\_HUMAN Basigin  
BASI\_HUMAN Basigin  
TNR3\_HUMAN Tumor necrosis factor receptor superfamily member 3  
IL6RB\_HUMAN Interleukin-6 receptor subunit beta  
ECE1\_HUMAN Endothelin-converting enzyme 1  
CD151\_HUMAN CD151 antigen  
CD151\_HUMAN CD151 antigen  
CD97\_HUMAN CD97 antigen  
CD97\_HUMAN CD97 antigen  
CD97\_HUMAN CD97 antigen  
SERPH\_HUMAN Serpin H1

BCAM\_HUMAN Basal cell adhesion molecule  
CLCN5\_HUMAN H(+)/Cl(-) exchange transporter 5  
CLCN5\_HUMAN H(+)/Cl(-) exchange transporter 5  
PLXA3\_HUMAN Plexin-A3  
CTR2\_HUMAN Low affinity cationic amino acid transporter 2  
EFNA3\_HUMAN Ephrin-A3  
PTTG\_HUMAN Pituitary tumor-transforming gene 1 protein-interacting protein  
AT1B3\_HUMAN Sodium/potassium-transporting ATPase subunit beta-3  
AT1B3\_HUMAN Sodium/potassium-transporting ATPase subunit beta-3  
S12A2\_HUMAN Solute carrier family 12 member 2  
S12A2\_HUMAN Solute carrier family 12 member 2  
LAMB2\_HUMAN Laminin subunit beta-2  
GFRA1\_HUMAN GDNF family receptor alpha-1  
GFRA1\_HUMAN GDNF family receptor alpha-1  
GFRA1\_HUMAN GDNF family receptor alpha-1  
JAG1\_HUMAN Protein jagged-1  
ADA17\_HUMAN Disintegrin and metalloproteinase domain-containing protein 17  
PGBM\_HUMAN Basement membrane-specific heparan sulfate proteoglycan core protein  
DSC2\_HUMAN Desmocollin-2  
UPAR\_HUMAN Urokinase plasminogen activator surface receptor  
NOTC2\_HUMAN Neurogenic locus notch homolog protein 2  
LRP1\_HUMAN Prolow-density lipoprotein receptor-related protein 1  
IL10R2\_HUMAN Interleukin-10 receptor subunit beta  
CD47\_HUMAN Leukocyte surface antigen CD47  
CD47\_HUMAN Leukocyte surface antigen CD47  
PTPRJ\_HUMAN Receptor-type tyrosine-protein phosphatase eta  
PTK7\_HUMAN Inactive tyrosine-protein kinase 7  
PTK7\_HUMAN Inactive tyrosine-protein kinase 7  
PTK7\_HUMAN Inactive tyrosine-protein kinase 7  
PTPRS\_HUMAN Receptor-type tyrosine-protein phosphatase S

S39A6\_HUMAN Zinc transporter ZIP6  
S39A6\_HUMAN Zinc transporter ZIP6  
S39A6\_HUMAN Zinc transporter ZIP6  
S39A6\_HUMAN Zinc transporter ZIP6  
ADA15\_HUMAN Disintegrin and metalloproteinase domain-containing protein 15  
ADA15\_HUMAN Disintegrin and metalloproteinase domain-containing protein 15  
TPBG\_HUMAN Trophoblast glycoprotein  
TPBG\_HUMAN Trophoblast glycoprotein  
TPBG\_HUMAN Trophoblast glycoprotein  
CD166\_HUMAN CD166 antigen  
CD166\_HUMAN Isoform 2 of CD166 antigen  
DAG1\_HUMAN Dystroglycan  
DAG1\_HUMAN Dystroglycan  
DSG2\_HUMAN Desmoglein-2  
DSG2\_HUMAN Desmoglein-2  
S29A2\_HUMAN Equilibrative nucleoside transporter 2  
GPNMB\_HUMAN Transmembrane glycoprotein NMB  
S39AE\_HUMAN Zinc transporter ZIP14  
PVRL1\_HUMAN Poliovirus receptor-related protein 1  
PVRL1\_HUMAN Poliovirus receptor-related protein 1  
PVRL1\_HUMAN Poliovirus receptor-related protein 1  
PTPRK\_HUMAN Receptor-type tyrosine-protein phosphatase kappa  
PTPRK\_HUMAN Receptor-type tyrosine-protein phosphatase kappa  
PTPRK\_HUMAN Receptor-type tyrosine-protein phosphatase kappa  
ERBB4\_HUMAN Receptor tyrosine-protein kinase erbB-4  
ERBB4\_HUMAN Receptor tyrosine-protein kinase erbB-4  
AAAT\_HUMAN Neutral amino acid transporter B(0)  
EFNB3\_HUMAN Ephrin-B3  
VAS1\_HUMAN V-type proton ATPase subunit S1  
SYPL1\_HUMAN Synaptophysin-like protein 1  
MICB\_HUMAN MHC class I polypeptide-related sequence B  
MICA\_HUMAN MHC class I polypeptide-related sequence A  
CC50B\_HUMAN Cell cycle control protein 50B

CC50B\_HUMAN Cell cycle control protein 50B  
ANO6\_HUMAN Anoctamin-6  
ANO6\_HUMAN Anoctamin-6  
NADL2\_HUMAN Inactive N-acetylated-alpha-linked acidic dipeptidase-like protein 2  
NADL2\_HUMAN Inactive N-acetylated-alpha-linked acidic dipeptidase-like protein 2  
SDK2\_HUMAN Protein sidekick-2  
MKS3\_HUMAN Meckelin  
ENTP8\_HUMAN Ectonucleoside triphosphate diphosphohydrolase 8  
FREM2\_HUMAN FRAS1-related extracellular matrix protein 2  
CAHD1\_HUMAN VWFA and cache domain-containing protein 1  
GP107\_HUMAN Protein GPR107  
RET1L\_HUMAN Retinoic acid early transcript 1L protein  
CD276\_HUMAN CD276 antigen  
CD276\_HUMAN CD276 antigen  
CD276\_HUMAN CD276 antigen  
CD276\_HUMAN CD276 antigen  
STEA3\_HUMAN Metalloreductase STEAP3  
VASN\_HUMAN Vasorin  
RET1G\_HUMAN Retinoic acid early transcript 1G protein  
CNNM4\_HUMAN Metal transporter CNNM4  
CNNM4\_HUMAN Metal transporter CNNM4  
CNNM4\_HUMAN Metal transporter CNNM4  
EMB\_HUMAN Embigin  
EMB\_HUMAN Embigin  
MPZL3\_HUMAN Myelin protein zero-like protein 3  
SE6L2\_HUMAN Seizure 6-like protein 2  
K1324\_HUMAN UPF0577 protein KIAA1324  
K1324\_HUMAN UPF0577 protein KIAA1324  
NPNT\_HUMAN Nephronectin  
CD109\_HUMAN CD109 antigen  
CD109\_HUMAN CD109 antigen  
THSD4\_HUMAN Thrombospondin type-1 domain-containing protein 4  
TMM26\_HUMAN Transmembrane protein 26  
BT2A1\_HUMAN Butyrophilin subfamily 2 member A1  
BT2A1\_HUMAN Butyrophilin subfamily 2 member A1  
SDK1\_HUMAN Protein sidekick-1  
SDK1\_HUMAN Protein sidekick-1  
GP126\_HUMAN G-protein coupled receptor 126  
GP126\_HUMAN G-protein coupled receptor 126  
TSN33\_HUMAN Tetraspanin-33  
OSTM1\_HUMAN Osteopetrosis-associated transmembrane protein 1

CTL2\_HUMAN Choline transporter-like protein 2  
CTL2\_HUMAN Choline transporter-like protein 2  
CTL2\_HUMAN Choline transporter-like protein 2  
LRC8A\_HUMAN Leucine-rich repeat-containing protein 8A  
SULF2\_HUMAN Extracellular sulfatase Sulf-2  
VSI10\_HUMAN V-set and immunoglobulin domain-containing protein 10  
PROM2\_HUMAN Prominin-2  
CADM2\_HUMAN Cell adhesion molecule 2  
FGRL1\_HUMAN Fibroblast growth factor receptor-like 1  
IGSF1\_HUMAN Immunoglobulin superfamily member 1  
DCBD1\_HUMAN Discoidin, CUB and LCCL domain-containing protein 1  
TM87A\_HUMAN Transmembrane protein 87A  
TM87A\_HUMAN Transmembrane protein 87A  
RN149\_HUMAN E3 ubiquitin-protein ligase RNF149  
CTL5\_HUMAN Choline transporter-like protein 5  
CTL5\_HUMAN Choline transporter-like protein 5  
CADM4\_HUMAN Cell adhesion molecule 4  
CADM4\_HUMAN Cell adhesion molecule 4  
PCD19\_HUMAN Protocadherin-19  
TIP\_HUMAN T-cell immunomodulatory protein  
TIP\_HUMAN T-cell immunomodulatory protein  
MIEAP\_HUMAN Mitochondria-eating protein  
SPP2A\_HUMAN Signal peptide peptidase-like 2A  
SPP2A\_HUMAN Signal peptide peptidase-like 2A  
SCRB1\_HUMAN Scavenger receptor class B member 1  
SCRB1\_HUMAN Scavenger receptor class B member 1  
LIPH\_HUMAN Lipase member H  
MUC16\_HUMAN Mucin-16  
PIEZ1\_HUMAN Piezo-type mechanosensitive ion channel component 1  
PIEZ1\_HUMAN Piezo-type mechanosensitive ion channel component 1  
NICA\_HUMAN Nicastrin  
NICA\_HUMAN Nicastrin  
NICA\_HUMAN Nicastrin  
NRCAM\_HUMAN Neuronal cell adhesion molecule  
SEM4D\_HUMAN Semaphorin-4D  
CA159\_HUMAN Uncharacterized protein C1orf159  
CA159\_HUMAN Uncharacterized protein C1orf159  
CA159\_HUMAN Uncharacterized protein C1orf159

TM87B\_HUMAN Transmembrane protein 87B  
PCFT\_HUMAN Proton-coupled folate transporter  
PVRL4\_HUMAN Poliovirus receptor-related protein 4  
MYCT\_HUMAN Proton myo-inositol cotransporter  
PANX1\_HUMAN Pannexin-1  
SORT\_HUMAN Sortilin  
P2RX4\_HUMAN P2X purinoceptor 4  
HCAR1\_HUMAN Hydroxycarboxylic acid receptor 1  
CADM1\_HUMAN Cell adhesion molecule 1  
CADM1\_HUMAN Cell adhesion molecule 1  
ABCA2\_HUMAN ATP-binding cassette sub-family A member 2  
ABCA2\_HUMAN ATP-binding cassette sub-family A member 2  
RTN4R\_HUMAN Reticulon-4 receptor  
SEM4C\_HUMAN Semaphorin-4C  
SEM4C\_HUMAN Semaphorin-4C  
SEM4C\_HUMAN Semaphorin-4C  
MAGT1\_HUMAN Magnesium transporter protein 1  
ITFG3\_HUMAN Protein ITFG3  
ITFG3\_HUMAN Protein ITFG3  
ITFG3\_HUMAN Protein ITFG3  
ANTR1\_HUMAN Anthrax toxin receptor 1  
CNNM2\_HUMAN Metal transporter CNNM2  
PCDH9\_HUMAN Protocadherin-9  
TMM8A\_HUMAN Transmembrane protein 8A  
TMM8A\_HUMAN Transmembrane protein 8A  
CELR2\_HUMAN Cadherin EGF LAG seven-pass G-type receptor 2  
APMAP\_HUMAN Adipocyte plasma membrane-associated protein  
IL1AP\_HUMAN Interleukin-1 receptor accessory protein  
SEM4B\_HUMAN Semaphorin-4B  
CELR1\_HUMAN Cadherin EGF LAG seven-pass G-type receptor 1  
CELR1\_HUMAN Cadherin EGF LAG seven-pass G-type receptor 1

JKAMP\_HUMAN JNK1/MAPK8-associated membrane protein  
ADA22\_HUMAN Disintegrin and metalloproteinase domain-containing protein 22  
FPRP\_HUMAN Prostaglandin F2 receptor negative regulator  
SUSD2\_HUMAN Sushi domain-containing protein 2  
SUSD2\_HUMAN Sushi domain-containing protein 2  
PCYOX\_HUMAN Prenylcysteine oxidase 1  
TMEM2\_HUMAN Transmembrane protein 2  
TMEM2\_HUMAN Transmembrane protein 2  
TMEM2\_HUMAN Transmembrane protein 2  
TMEM2\_HUMAN Transmembrane protein 2  
S12A6\_HUMAN Solute carrier family 12 member 6  
SO3A1\_HUMAN Solute carrier organic anion transporter family member 3A1  
PLXA1\_HUMAN Plexin-A1  
PLXA1\_HUMAN Plexin-A1  
GGT7\_HUMAN Gamma-glutamyltransferase 7  
TINAG\_HUMAN Isoform 2 of Tubulointerstitial nephritis antigen  
TINAG\_HUMAN Isoform 2 of Tubulointerstitial nephritis antigen  
S39AA\_HUMAN Zinc transporter ZIP10  
HEG1\_HUMAN Protein HEG homolog 1  
NOTC3\_HUMAN Neurogenic locus notch homolog protein 3  
S6A14\_HUMAN Sodium- and chloride-dependent neutral and basic amino acid transporter B(0+)  
S6A14\_HUMAN Sodium- and chloride-dependent neutral and basic amino acid transporter B(0+)  
S6A14\_HUMAN Sodium- and chloride-dependent neutral and basic amino acid transporter B(0+)  
FZD1\_HUMAN Frizzled-1  
PLXD1\_HUMAN Plexin-D1  
PLXD1\_HUMAN Plexin-D1  
PLXD1\_HUMAN Plexin-D1  
HYOU1\_HUMAN Hypoxia up-regulated protein 1  
ENTP2\_HUMAN Ectonucleoside triphosphate diphosphohydrolase 2  
ST14\_HUMAN Suppressor of tumorigenicity 14 protein  
NPTN\_HUMAN Neuroplastin  
NPTN\_HUMAN Neuroplastin  
NPTN\_HUMAN Neuroplastin  
NPTN\_HUMAN Neuroplastin  
GPR56\_HUMAN G-protein coupled receptor 56

S4A7\_HUMAN Sodium bicarbonate cotransporter 3

S4A7\_HUMAN Sodium bicarbonate cotransporter 3

**Table S2 - Unique N-Glycosylation Sites (475 Si**

| <b>Uniprot ID</b> | <b>Gene Symbol</b> | <b>Site</b> | <b>ModScore</b> |
|-------------------|--------------------|-------------|-----------------|
| A8MVW0            | FAM171A2           | 66          | 1000            |
| A8MWY0            | KIAA1324L          | 560         | 1000            |
| O00592            | PODXL              | 360         | 11.02           |
| O14494            | PPAP2A             | 142         | 1000            |
| O14672            | ADAM10             | 439         | 1000            |
| O14672            | ADAM10             | 551         | 8.59            |
| O14786            | NRP1               | 150         | 1000            |
| O14786            | NRP1               | 522         | 24.44           |
| O15031            | PLXNB2             | 127         | 1000            |
| O15031            | PLXNB2             | 391         | 126.31          |
| O15031            | PLXNB2             | 401         | 6.59            |
| O15031            | PLXNB2             | 402         | 17.01           |
| O15031            | PLXNB2             | 528         | 1000            |
| O15031            | PLXNB2             | 733         | 1000            |
| O15031            | PLXNB2             | 844         | 1000            |
| O15031            | PLXNB2             | 1049        | 1000            |
| O15230            | LAMA5              | 2196        | 1000            |
| O15230            | LAMA5              | 2423        | 1000            |
| O15230            | LAMA5              | 3107        | 1000            |
| O15394            | NCAM2              | 219         | 1000            |
| O15394            | NCAM2              | 474         | 39.66           |
| O15394            | NCAM2              | 562         | 18.81           |
| O15455            | TLR3               | 507         | 8.91            |
| O15455            | TLR3               | 517         | 6.59            |
| O15455            | TLR3               | 520         | 1.60            |
| O43157            | PLXNB1             | 1253        | 1000            |
| O43194            | GPR39              | 192         | 1000            |
| O43688            | PPAP2C             | 139         | 1000            |
| O60487            | MPZL2              | 39          | 1000            |
| O60637            | TSPAN3             | 127         | 24.24           |
| O60637            | TSPAN3             | 167         | 1000            |
| O60814            | HIST1H2BK          | 64          | 20.17           |
| O60896            | RAMP3              | 103         | 1000            |
| O75054            | IGSF3              | 101         | 1000            |
| O75054            | IGSF3              | 655         | 17.01           |
| O75054            | IGSF3              | 825         | 1000            |
| O75054            | IGSF3              | 842         | 1000            |

|        |          |      |       |
|--------|----------|------|-------|
| O75054 | IGSF3    | 961  | 1000  |
| O75144 | ICOSLG   | 70   | 15.38 |
| O75144 | ICOSLG   | 102  | 1000  |
| O75882 | ATRN     | 914  | 16.96 |
| O75882 | ATRN     | 923  | 12.07 |
| O75882 | ATRN     | 1073 | 1000  |
| O75882 | ATRN     | 1082 | 1000  |
| O75954 | TSPAN9   | 180  | 1000  |
| O75976 | CPD      | 626  | 13.38 |
| O76082 | SLC22A5  | 57   | 1000  |
| O76082 | SLC22A5  | 91   | 1000  |
| O95084 | PRSS23   | 207  | 1000  |
| O95136 | S1PR2    | 19   | 1000  |
| O95185 | UNC5C    | 236  | 1000  |
| O95196 | CSPG5    | 355  | 1000  |
| O95274 | LYPD3    | 118  | 1000  |
| O95274 | LYPD3    | 163  | 1000  |
| O95274 | LYPD3    | 176  | 1000  |
| O95274 | LYPD3    | 183  | 1000  |
| O95274 | LYPD3    | 227  | 39.66 |
| O95297 | MPZL1    | 50   | 1000  |
| O95857 | TSPAN13  | 137  | 17.01 |
| O95858 | TSPAN15  | 189  | 71.75 |
| P01892 | HLA-A    | 110  | 1000  |
| P02786 | TFRC     | 251  | 1000  |
| P02786 | TFRC     | 723  | 24.44 |
| P02786 | TFRC     | 727  | 84.61 |
| P04156 | PRNP     | 197  | 1000  |
| P04406 | GAPDH    | 9    | 1000  |
| P04406 | GAPDH    | 225  | 1000  |
| P04626 | ERBB2    | 530  | 1000  |
| P05026 | ATP1B1   | 158  | 17.25 |
| P05026 | ATP1B1   | 193  | 1000  |
| P05026 | ATP1B1   | 265  | 1000  |
| P05120 | SERPINB2 | 115  | 4.55  |
| P05362 | ICAM1    | 145  | 1000  |
| P05362 | ICAM1    | 267  | 51.81 |
| P05556 | ITGB1    | 205  | 6.60  |
| P05556 | ITGB1    | 212  | 38.78 |
| P05556 | ITGB1    | 406  | 73.31 |
| P05556 | ITGB1    | 481  | 1000  |

|        |         |     |        |
|--------|---------|-----|--------|
| P05556 | ITGB1   | 520 | 94.66  |
| P05556 | ITGB1   | 527 | 0.00   |
| P05556 | ITGB1   | 669 | 1000   |
| P06213 | INSR    | 920 | 1000   |
| P06280 | GLA     | 215 | 1000   |
| P06731 | CEACAM5 | 152 | 13.38  |
| P06731 | CEACAM5 | 204 | 1000   |
| P06731 | CEACAM5 | 246 | 75.74  |
| P06731 | CEACAM5 | 375 | 48.87  |
| P06731 | CEACAM5 | 508 | 14.97  |
| P06731 | CEACAM5 | 580 | 9.30   |
| P06731 | CEACAM5 | 650 | 0.00   |
| P06731 | CEACAM5 | 659 | 3.49   |
| P06731 | CEACAM5 | 665 | 24.44  |
| P06756 | ITGAV   | 74  | 1000   |
| P06756 | ITGAV   | 554 | 1000   |
| P06756 | ITGAV   | 704 | 1000   |
| P06756 | ITGAV   | 874 | 1000   |
| P06756 | ITGAV   | 945 | 11.02  |
| P08069 | IGF1R   | 244 | 66.98  |
| P08069 | IGF1R   | 314 | 1000   |
| P08069 | IGF1R   | 607 | 1000   |
| P08069 | IGF1R   | 622 | 1000   |
| P08069 | IGF1R   | 638 | 57.71  |
| P08069 | IGF1R   | 640 | 58.55  |
| P08069 | IGF1R   | 747 | 1000   |
| P08069 | IGF1R   | 756 | 1000   |
| P08069 | IGF1R   | 764 | 1000   |
| P08069 | IGF1R   | 900 | 53.53  |
| P08069 | IGF1R   | 913 | 1000   |
| P08174 | CD55    | 95  | 1000   |
| P08195 | SLC3A2  | 365 | 1000   |
| P08195 | SLC3A2  | 381 | 128.04 |
| P08195 | SLC3A2  | 424 | 44.28  |
| P08195 | SLC3A2  | 428 | 2.19   |
| P08473 | MME     | 145 | 1000   |
| P08473 | MME     | 285 | 38.18  |
| P08648 | ITGA5   | 297 | 1000   |
| P08648 | ITGA5   | 307 | 1000   |
| P08648 | ITGA5   | 593 | 1000   |
| P08648 | ITGA5   | 773 | 24.44  |

|        |         |      |       |
|--------|---------|------|-------|
| P08648 | ITGA5   | 868  | 18.81 |
| P08962 | CD63    | 130  | 0.00  |
| P09758 | TACSTD2 | 120  | 70.91 |
| P09758 | TACSTD2 | 168  | 1000  |
| P09758 | TACSTD2 | 208  | 1000  |
| P10586 | PTPRF   | 966  | 40.36 |
| P10909 | CLU     | 291  | 1000  |
| P11047 | LAMC1   | 1022 | 25.17 |
| P11047 | LAMC1   | 1107 | 24.44 |
| P11047 | LAMC1   | 1395 | 29.67 |
| P11047 | LAMC1   | 1439 | 1000  |
| P11166 | SLC2A1  | 45   | 1000  |
| P11279 | LAMP1   | 62   | 1000  |
| P11279 | LAMP1   | 76   | 1000  |
| P11279 | LAMP1   | 84   | 1000  |
| P11279 | LAMP1   | 103  | 1000  |
| P11279 | LAMP1   | 249  | 1000  |
| P11279 | LAMP1   | 307  | 1000  |
| P11362 | FGFR1   | 317  | 1000  |
| P11717 | IGF2R   | 400  | 1000  |
| P11717 | IGF2R   | 2085 | 1000  |
| P12821 | ACE     | 146  | 97.60 |
| P12821 | ACE     | 695  | 30.61 |
| P13473 | LAMP2   | 49   | 1000  |
| P13473 | LAMP2   | 58   | 1000  |
| P13473 | LAMP2   | 101  | 1000  |
| P13473 | LAMP2   | 275  | 1000  |
| P13473 | LAMP2   | 356  | 1000  |
| P13987 | CD59    | 43   | 1000  |
| P15260 | IFNGR1  | 179  | 1000  |
| P16070 | CD44    | 57   | 1000  |
| P16144 | ITGB4   | 695  | 1000  |
| P16422 | EPCAM   | 74   | 1000  |
| P16422 | EPCAM   | 111  | 53.71 |
| P16422 | EPCAM   | 198  | 0.60  |
| P17181 | IFNAR1  | 81   | 1000  |
| P17181 | IFNAR1  | 172  | 1000  |
| P17301 | ITGA2   | 105  | 53.71 |
| P17301 | ITGA2   | 343  | 1000  |
| P17301 | ITGA2   | 1074 | 1000  |
| P18084 | ITGB5   | 586  | 0.00  |

|        |          |     |        |
|--------|----------|-----|--------|
| P18564 | ITGB6    | 463 | 1000   |
| P19256 | CD58     | 169 | 1000   |
| P19438 | TNFRSF1A | 54  | 6.59   |
| P20645 | M6PR     | 57  | 1000   |
| P20645 | M6PR     | 83  | 43.60  |
| P21589 | NT5E     | 333 | 1000   |
| P21802 | FGFR2    | 83  | 0.00   |
| P21860 | ERBB3    | 437 | 48.87  |
| P21860 | ERBB3    | 522 | 1000   |
| P21860 | ERBB3    | 616 | 2.67   |
| P21926 | CD9      | 151 | 1000   |
| P22223 | CDH3     | 566 | 1000   |
| P22413 | ENPP1    | 285 | 1000   |
| P22413 | ENPP1    | 341 | 1000   |
| P22413 | ENPP1    | 477 | 16.27  |
| P23229 | ITGA6    | 770 | 12.09  |
| P25106 | ACKR3    | 192 | 0.00   |
| P25445 | FAS      | 118 | 1000   |
| P25445 | FAS      | 136 | 20.63  |
| P26006 | ITGA3    | 107 | 1000   |
| P26006 | ITGA3    | 265 | 1000   |
| P26006 | ITGA3    | 511 | 1000   |
| P26006 | ITGA3    | 656 | 24.24  |
| P26006 | ITGA3    | 969 | 37.54  |
| P26012 | ITGB8    | 466 | 50.81  |
| P27701 | CD82     | 198 | 1000   |
| P29323 | EPHB2    | 482 | 1000   |
| P30464 | HLA-B    | 110 | 1000   |
| P30825 | SLC7A1   | 226 | 142.63 |
| P30825 | SLC7A1   | 235 | 24.44  |
| P30988 | CALCR    | 91  | 1000   |
| P32004 | L1CAM    | 294 | 20.17  |
| P32004 | L1CAM    | 671 | 1000   |
| P32004 | L1CAM    | 849 | 1000   |
| P35052 | GPC1     | 116 | 1000   |
| P35613 | BSG      | 160 | 1000   |
| P35613 | BSG      | 268 | 1000   |
| P35613 | BSG      | 302 | 1000   |
| P40189 | IL6ST    | 83  | 1000   |
| P40189 | IL6ST    | 131 | 71.75  |
| P42892 | ECE1     | 166 | 1000   |

|        |          |      |        |
|--------|----------|------|--------|
| P42892 | ECE1     | 187  | 1000   |
| P42892 | ECE1     | 210  | 1000   |
| P42892 | ECE1     | 249  | 6.59   |
| P42892 | ECE1     | 270  | 1000   |
| P42892 | ECE1     | 539  | 1000   |
| P42892 | ECE1     | 632  | 1000   |
| P42892 | ECE1     | 651  | 40.36  |
| P48960 | CD97     | 38   | 9.39   |
| P48960 | CD97     | 371  | 1000   |
| P50454 | SERPINH1 | 120  | 1000   |
| P50895 | BCAM     | 439  | 1000   |
| P51795 | CLCN5    | 408  | 33.66  |
| P51805 | PLXNA3   | 59   | 1000   |
| P52569 | SLC7A2   | 227  | 1000   |
| P52797 | EFNA3    | 100  | 1000   |
| P53801 | PTTG1IP  | 54   | 78.16  |
| P54709 | ATP1B3   | 124  | 1000   |
| P54709 | ATP1B3   | 240  | 7.71   |
| P55011 | SLC12A2  | 553  | 24.44  |
| P55011 | SLC12A2  | 562  | 51.57  |
| P55268 | LAMB2    | 1249 | 1000   |
| P55268 | LAMB2    | 1348 | 119.27 |
| P55316 | FOXP1    | 232  | 0.16   |
| P56159 | GFRA1    | 59   | 1000   |
| P56159 | GFRA1    | 406  | 20.99  |
| P56749 | CLDN12   | 47   | 1000   |
| P78504 | JAG1     | 217  | 20.17  |
| P78536 | ADAM17   | 452  | 1000   |
| P78536 | ADAM17   | 539  | 1000   |
| P78536 | ADAM17   | 594  | 2.02   |
| P78552 | IL13RA1  | 157  | 13.38  |
| P98160 | HSPG2    | 89   | 1000   |
| Q02487 | DSC2     | 392  | 1000   |
| Q02487 | DSC2     | 629  | 1000   |
| Q03405 | PLAUR    | 194  | 1000   |
| Q04721 | NOTCH2   | 46   | 2.24   |
| Q07954 | LRP1     | 2521 | 1000   |
| Q07954 | LRP1     | 3333 | 1000   |
| Q07954 | LRP1     | 4364 | 1000   |
| Q08174 | PCDH1    | 305  | 26.89  |
| Q08334 | IL10RB   | 49   | 1000   |

|          |         |      |        |
|----------|---------|------|--------|
| Q08334   | IL10RB  | 161  | 1000   |
| Q08722   | CD47    | 73   | 1000   |
| Q08722   | CD47    | 111  | 1000   |
| Q12913   | PTPRJ   | 231  | 0.00   |
| Q12913   | PTPRJ   | 342  | 1000   |
| Q12913   | PTPRJ   | 351  | 1000   |
| Q12913   | PTPRJ   | 391  | 1000   |
| Q12913   | PTPRJ   | 396  | 1000   |
| Q12913   | PTPRJ   | 413  | 4.09   |
| Q12913   | PTPRJ   | 525  | 1000   |
| Q12999   | TSPAN31 | 109  | 1000   |
| Q12999   | TSPAN31 | 117  | 1000   |
| Q13308   | PTK7    | 283  | 1000   |
| Q13308   | PTK7    | 405  | 1000   |
| Q13308   | PTK7    | 567  | 55.37  |
| Q13332   | PTPRS   | 733  | 1000   |
| Q13433   | SLC39A6 | 67   | 17.01  |
| Q13433   | SLC39A6 | 241  | 1000   |
| Q13433   | SLC39A6 | 266  | 7.65   |
| Q13443   | ADAM9   | 381  | 1000   |
| Q13444   | ADAM15  | 237  | 1000   |
| Q13444   | ADAM15  | 389  | 1000   |
| Q13444   | ADAM15  | 392  | 1000   |
| Q13641   | TPBG    | 81   | 1000   |
| Q13641   | TPBG    | 166  | 20.35  |
| Q13641   | TPBG    | 181  | 0.00   |
| Q13641   | TPBG    | 192  | 18.96  |
| Q13641   | TPBG    | 256  | 132.25 |
| Q13641   | TPBG    | 275  | 1000   |
| Q13740   | ALCAM   | 95   | 18.81  |
| Q13740   | ALCAM   | 167  | 1000   |
| Q13740   | ALCAM   | 265  | 1000   |
| Q13740   | ALCAM   | 306  | 1000   |
| Q13740   | ALCAM   | 361  | 1000   |
| Q13740   | ALCAM   | 480  | 94.95  |
| Q13740-2 | ALCAM   | 499  | 59.30  |
| Q13813   | SPTAN1  | 1356 | 1000   |
| Q14118   | DAG1    | 641  | 1000   |
| Q14118   | DAG1    | 649  | 1000   |
| Q14126   | DSG2    | 112  | 1000   |
| Q14126   | DSG2    | 182  | 84.61  |

|        |          |     |       |
|--------|----------|-----|-------|
| Q14126 | DSG2     | 462 | 1000  |
| Q14542 | SLC29A2  | 48  | 1000  |
| Q14956 | GPNMB    | 249 | 16.06 |
| Q15043 | SLC39A14 | 77  | 1000  |
| Q15223 | PVRL1    | 72  | 1000  |
| Q15223 | PVRL1    | 202 | 30.84 |
| Q15223 | PVRL1    | 297 | 1000  |
| Q15262 | PTPRK    | 416 | 1000  |
| Q15303 | ERBB4    | 358 | 1000  |
| Q15303 | ERBB4    | 576 | 1000  |
| Q15758 | SLC1A5   | 212 | 1000  |
| Q15768 | EFNB3    | 210 | 11.72 |
| Q15904 | ATP6AP1  | 261 | 1000  |
| Q16563 | SYPL1    | 71  | 27.12 |
| Q29983 | MICA     | 79  | 1000  |
| Q29983 | MICA     | 125 | 1000  |
| Q29983 | MICA     | 210 | 1000  |
| Q29983 | MICA     | 220 | 1000  |
| Q3MIR4 | TMEM30B  | 213 | 11.07 |
| Q3MIR4 | TMEM30B  | 241 | 13.38 |
| Q3MIR4 | TMEM30B  | 273 | 1000  |
| Q3ZCQ3 | FAM174B  | 53  | 1000  |
| Q4KMQ2 | ANO6     | 493 | 30.84 |
| Q4KMQ2 | ANO6     | 802 | 22.53 |
| Q58DX5 | NAALADL2 | 295 | 37.54 |
| Q58DX5 | NAALADL2 | 556 | 48.87 |
| Q58EX2 | SDK2     | 577 | 1000  |
| Q58EX2 | SDK2     | 936 | 33.66 |
| Q5HYA8 | TMEM67   | 179 | 1000  |
| Q5MY95 | ENTPD8   | 135 | 1000  |
| Q5VU97 | CACHD1   | 329 | 24.44 |
| Q5VW38 | GPR107   | 169 | 12.79 |
| Q5ZPR3 | CD276    | 91  | 1000  |
| Q5ZPR3 | CD276    | 104 | 1000  |
| Q5ZPR3 | CD276    | 215 | 1000  |
| Q5ZPR3 | CD276    | 309 | 1000  |
| Q658P3 | STEAP3   | 344 | 1000  |
| Q6EMK4 | VASN     | 117 | 1000  |
| Q6H3X3 | RAET1G   | 82  | 1000  |
| Q6P4Q7 | CNNM4    | 85  | 15.01 |
| Q6P4Q7 | CNNM4    | 127 | 1000  |

|        |          |      |        |
|--------|----------|------|--------|
| Q6PCB8 | EMB      | 83   | 0.65   |
| Q6PCB8 | EMB      | 85   | 0.34   |
| Q6PCB8 | EMB      | 100  | 1.72   |
| Q6PCB8 | EMB      | 213  | 1000   |
| Q6PCB8 | EMB      | 218  | 1000   |
| Q6UXD5 | SEZ6L2   | 641  | 1000   |
| Q6UXG2 | KIAA1324 | 391  | 0.00   |
| Q6UXG2 | KIAA1324 | 404  | 10.77  |
| Q6UXG2 | KIAA1324 | 672  | 5.09   |
| Q6UXI9 | NPNT     | 273  | 1000   |
| Q6YHK3 | CD109    | 118  | 1000   |
| Q6YHK3 | CD109    | 419  | 1000   |
| Q6ZMP0 | THSD4    | 709  | 1000   |
| Q6ZUK4 | TMEM26   | 110  | 18.98  |
| Q7KYR7 | BTN2A1   | 216  | 58.82  |
| Q7KYR7 | BTN2A1   | 222  | 17.01  |
| Q7Z5N4 | SDK1     | 782  | 75.10  |
| Q7Z5N4 | SDK1     | 1767 | 1000   |
| Q86SQ4 | GPR126   | 143  | 1000   |
| Q86SQ4 | GPR126   | 505  | 5.75   |
| Q86UF1 | TSPAN33  | 172  | 2.02   |
| Q8IWA5 | SLC44A2  | 187  | 1000   |
| Q8IWA5 | SLC44A2  | 200  | 1000   |
| Q8IWA5 | SLC44A2  | 417  | 84.61  |
| Q8IWT6 | LRRC8A   | 66   | 1000   |
| Q8IWU5 | SULF2    | 132  | 1000   |
| Q8IWU5 | SULF2    | 171  | 1000   |
| Q8N0Z9 | VSIG10   | 347  | 1000   |
| Q8N271 | PROM2    | 725  | 1000   |
| Q8N6C5 | IGSF1    | 607  | 1000   |
| Q8N8Z6 | DCBLD1   | 64   | 23.35  |
| Q8NAC3 | IL17RC   | 443  | 18.98  |
| Q8NBN3 | TMEM87A  | 157  | 1000   |
| Q8NBN3 | TMEM87A  | 160  | 1000   |
| Q8NC42 | RNF149   | 131  | 100.02 |
| Q8NE01 | CNNM3    | 73   | 1000   |
| Q8NFZ8 | CADM4    | 67   | 1000   |
| Q8NFZ8 | CADM4    | 259  | 7.97   |
| Q8NFZ8 | CADM4    | 262  | 0.00   |
| Q8TAB3 | PCDH19   | 546  | 1000   |
| Q8TB96 | ITFG1    | 353  | 16.06  |

|        |          |       |       |
|--------|----------|-------|-------|
| Q8TB96 | ITFG1    | 371   | 0.00  |
| Q8TCJ2 | STT3B    | 628   | 0.00  |
| Q8TCT8 | SPPL2A   | 149   | 1000  |
| Q8TCT8 | SPPL2A   | 155   | 1000  |
| Q8WTV0 | SCARB1   | 102   | 76.73 |
| Q8WTV0 | SCARB1   | 108   | 24.44 |
| Q8WWI5 | SLC44A1  | 180   | 1000  |
| Q8WWY8 | LIPH     | 357   | 1000  |
| Q8WXI7 | MUC16    | 12416 | 1000  |
| Q92508 | PIEZO1   | 2294  | 1000  |
| Q92508 | PIEZO1   | 2331  | 1000  |
| Q92542 | NCSTN    | 387   | 1000  |
| Q92542 | NCSTN    | 417   | 1000  |
| Q92542 | NCSTN    | 612   | 1000  |
| Q92823 | NRCAM    | 223   | 1000  |
| Q92823 | NRCAM    | 276   | 45.03 |
| Q92823 | NRCAM    | 858   | 28.93 |
| Q92854 | SEMA4D   | 379   | 33.66 |
| Q96HA4 | C1orf159 | 104   | 1000  |
| Q96HA4 | C1orf159 | 111   | 1000  |
| Q96HA4 | C1orf159 | 128   | 1000  |
| Q96K49 | TMEM87B  | 68    | 1000  |
| Q96NT5 | SLC46A1  | 58    | 1000  |
| Q96NY8 | PVRL4    | 281   | 1000  |
| Q96QE2 | SLC2A13  | 433   | 1000  |
| Q96RD7 | PANX1    | 255   | 1000  |
| Q99523 | SORT1    | 162   | 24.44 |
| Q99571 | P2RX4    | 75    | 1000  |
| Q9BRN9 | TM2D3    | 157   | 1000  |
| Q9BTN0 | LRFN3    | 339   | 1000  |
| Q9BXC0 | HCAR1    | 3     | 1000  |
| Q9BY67 | CADM1    | 113   | 1000  |
| Q9BZC7 | ABCA2    | 1549  | 1000  |
| Q9BZC7 | ABCA2    | 1557  | 1000  |
| Q9C0C4 | SEMA4C   | 106   | 24.44 |
| Q9C0C4 | SEMA4C   | 121   | 1000  |
| Q9C0C4 | SEMA4C   | 522   | 1000  |
| Q9H0U3 | MAGT1    | 71    | 1000  |
| Q9H0X4 | ITFG3    | 116   | 48.87 |
| Q9H0X4 | ITFG3    | 120   | 24.44 |
| Q9H0X4 | ITFG3    | 314   | 1000  |

|        |         |      |       |
|--------|---------|------|-------|
| Q9H0X4 | ITFG3   | 389  | 1000  |
| Q9H2X9 | SLC12A5 | 333  | 1000  |
| Q9H2X9 | SLC12A5 | 351  | 9.11  |
| Q9H2X9 | SLC12A5 | 361  | 0.85  |
| Q9H2X9 | SLC12A5 | 362  | 0.65  |
| Q9H6X2 | ANTXR1  | 184  | 1000  |
| Q9H8M5 | CNNM2   | 112  | 24.44 |
| Q9HC56 | PCDH9   | 450  | 1000  |
| Q9HC58 | SLC24A3 | 86   | 31.60 |
| Q9HCN3 | TMEM8A  | 535  | 1000  |
| Q9HCU4 | CELSR2  | 1036 | 20.17 |
| Q9HCU4 | CELSR2  | 1076 | 71.07 |
| Q9HCU4 | CELSR2  | 1501 | 1000  |
| Q9HCU4 | CELSR2  | 1565 | 0.00  |
| Q9HCU4 | CELSR2  | 1741 | 1000  |
| Q9HCU4 | CELSR2  | 1900 | 1000  |
| Q9HCU4 | CELSR2  | 2024 | 0.00  |
| Q9HCU4 | CELSR2  | 2043 | 1000  |
| Q9HCU4 | CELSR2  | 2061 | 1000  |
| Q9HDC9 | APMAP   | 160  | 1000  |
| Q9NPH3 | IL1RAP  | 107  | 1000  |
| Q9NPH3 | IL1RAP  | 111  | 1000  |
| Q9NPH3 | IL1RAP  | 118  | 1000  |
| Q9NPR2 | SEMA4B  | 405  | 1000  |
| Q9NV96 | TMEM30A | 107  | 1000  |
| Q9NV96 | TMEM30A | 294  | 6.04  |
| Q9NYQ6 | CELSR1  | 1576 | 1000  |
| Q9NYQ6 | CELSR1  | 1640 | 9.34  |
| Q9NYQ6 | CELSR1  | 1982 | 2.81  |
| Q9NYQ6 | CELSR1  | 2122 | 1000  |
| Q9NZU0 | FLRT3   | 226  | 24.24 |
| Q9P055 | JKAMP   | 37   | 1000  |
| Q9P0K1 | ADAM22  | 519  | 1.58  |
| Q9P2B2 | PTGFRN  | 286  | 1000  |
| Q9P2B2 | PTGFRN  | 300  | 1000  |
| Q9P2B2 | PTGFRN  | 525  | 6.59  |
| Q9P2B2 | PTGFRN  | 600  | 1000  |
| Q9P2B2 | PTGFRN  | 618  | 1000  |
| Q9UGT4 | SUSD2   | 162  | 1000  |
| Q9UGT4 | SUSD2   | 494  | 1000  |
| Q9UHG3 | PCYOX1  | 323  | 46.82 |

|        |          |      |       |
|--------|----------|------|-------|
| Q9UHN6 | TMEM2    | 292  | 1000  |
| Q9UHN6 | TMEM2    | 739  | 1000  |
| Q9UHN6 | TMEM2    | 1092 | 1000  |
| Q9UHW9 | SLC12A6  | 398  | 9.34  |
| Q9UIG8 | SLCO3A1  | 153  | 1000  |
| Q9UIW2 | PLXNA1   | 1043 | 1000  |
| Q9ULF5 | SLC39A10 | 339  | 58.70 |
| Q9UM47 | NOTCH3   | 1179 | 1000  |
| Q9UN76 | SLC6A14  | 155  | 1000  |
| Q9UN76 | SLC6A14  | 174  | 30.61 |
| Q9UN76 | SLC6A14  | 189  | 1000  |
| Q9UP38 | FZD1     | 231  | 1000  |
| Q9Y4D7 | PLXND1   | 155  | 1000  |
| Q9Y4D7 | PLXND1   | 500  | 30.84 |
| Q9Y4D7 | PLXND1   | 696  | 1000  |
| Q9Y4L1 | HYOU1    | 869  | 1000  |
| Q9Y4L1 | HYOU1    | 922  | 1000  |
| Q9Y4L1 | HYOU1    | 931  | 1000  |
| Q9Y5L3 | ENTPD2   | 129  | 31.28 |
| Q9Y5L3 | ENTPD2   | 294  | 0.00  |
| Q9Y5Y6 | ST14     | 485  | 1000  |
| Q9Y639 | NPTN     | 197  | 73.31 |
| Q9Y639 | NPTN     | 229  | 1000  |
| Q9Y639 | NPTN     | 276  | 1000  |
| Q9Y639 | NPTN     | 284  | 1000  |
| Q9Y653 | GPR56    | 303  | 1000  |
| Q9Y6M7 | SLC4A7   | 786  | 49.59 |
| Q9Y6M7 | SLC4A7   | 796  | 1000  |

## tes) Identified on 239 Surface Glycoprotein

| ModScore Peptide                   | PPM   | XCorr |
|------------------------------------|-------|-------|
| R.ASVDFVFGN#R.T                    | 1.11  | 1.35  |
| K.N#ATFTFTWAFQR.T                  | 2.24  | 4.228 |
| K.QLVLN#LTGNTLCAGGASDEK.L          | 0.7   | 3.083 |
| K.IN#CSDGYIEYYICR.G                | -0.39 | 2.133 |
| R.N#ISQVLEK.K                      | 0.66  | 3.521 |
| R.EGICNGFTALCPASDPKPN#FTDCNR.H     | -0.66 | 1.858 |
| K.RGPECSQN#YTPSGVIK.S              | -0.19 | 2.864 |
| K.IGYSNN#GSDWK.M                   | 0.03  | 2.136 |
| R.ALSN#ISLR.L                      | -0.1  | 2.429 |
| R.GGLN#LTAVTVAAEN#NHTVAFLGTS DGR.I | -0.89 | 7.781 |
| R.GGLN#LTAVTVAAEN#NHTVAFLGTS DGR.I | -0.89 | 7.781 |
| R.GGLN#LTAVTVAAENN#HTVAFLGTS DGR.I | -5.97 | 8.166 |
| K.SCVAVTSAQPQN#MSR.R               | -0.17 | 2.105 |
| K.LSHDAN#ETLPLHLYVK.S              | -0.76 | 5.708 |
| R.N#CSFQPER.Y                      | -0.89 | 1.394 |
| R.EAESLQPMTVVGT DYVFHN#DTK.V       | -0.28 | 1.754 |
| R.GIN#ASSMAWAR.L                   | -0.81 | 2.632 |
| R.KQELSRDN#ATLQATLHAAR.D           | 0.97  | 3.856 |
| K.RLN#TTGVSAGCTADLLVGR.A           | -0.53 | 4.797 |
| K.SFN#ATAERGEEM*TFSCR.A            | -0.23 | 1.628 |
| R.YN#CTATNHIGTR.F                  | -1.05 | 2.86  |
| R.SHGVQTM*VVLN NLEPN#TTYEIR.V      | 0.42  | 5.265 |
| R.N#LTILDLSN NN#IAN#INDDMLEGLEK.L  | -4.78 | 1.527 |
| R.N#LTILDLSN NN#IAN#INDDMLEGLEK.L  | -4.78 | 1.527 |
| R.N#LTILDLSN NN#IAN#INDDMLEGLEK.L  | -4.78 | 1.527 |
| K.YTLDPN#ITSAGPTK.S                | -1.12 | 1.828 |
| R.GLTCN#R.S                        | -0.26 | 1.934 |
| R.VN#CSVYVQLEK.V                   | 1.16  | 2.566 |
| R.VLEAVN#GTDAR.L                   | -0.53 | 1.827 |
| K.TYN#GTNPDAASR.A                  | -0.15 | 1.809 |
| K.N#QSVPLSCCR.E                    | -1.14 | 1.433 |
| K.AMGIMN#SFVNDIFER.I               | -0.06 | 2.238 |
| R.QFFSN#CTVDR.V                    | -1.2  | 3.09  |
| R.VQGN#STLLHITDLQAR.D              | 4.03  | 3.094 |
| K.NYN#NTWTR.L                      | -0.41 | 1.521 |
| R.LSQAQGN#LSVLETR.Q                | 2.53  | 1.919 |
| R.QVQLECVVLN#R.T                   | 0.35  | 1.776 |

|                                   |       |       |
|-----------------------------------|-------|-------|
| K.RAEDTAGQALTVMRPDASLQVDTVVPN#AT' | -0.11 | 2.19  |
| K.TVVTYHIPQN#SSENVDSR.Y           | -0.17 | 3.34  |
| R.LFN#VTPQDEQK.F                  | 0.72  | 3.348 |
| K.AATCINPLN#GSVCERPAN#HSAK.Q      | 0.42  | 2.587 |
| K.AATCINPLN#GSVCERPAN#HSAK.Q      | 0.42  | 2.587 |
| K.CIN#QSICEK.C                    | -1.3  | 2.039 |
| K.CEN#LTTGK.H                     | -3.08 | 1.831 |
| R.N#ATTPLWR.T                     | -0.21 | 2.189 |
| R.N#NSNNFDLNR.N                   | 1.1   | 1.469 |
| R.CRVPDAAN#LSSAWR.N               | 0.01  | 4.61  |
| R.LATIAN#FSALGLEPGR.D             | 1.88  | 2.656 |
| R.GAN#DSTSAMPEQMK.F               | 1.48  | 1.881 |
| K.VQEHYN#YTK.E                    | -2    | 3.323 |
| R.LSDTAN#YTCVAK.N                 | -1.47 | 1.215 |
| R.DLASSEN#GTECR.S                 | -0.3  | 2.145 |
| K.LN#LTSR.A                       | -0.37 | 2.029 |
| R.EACQGTSPVVCYN#ASDHVYK.G         | -0.18 | 3.164 |
| K.GCFDGN#VTLTAAN#VTVSLPVR.G       | 3.24  | 3.909 |
| K.GCFDGN#VTLTAAN#VTVSLPVR.G       | 3.24  | 3.909 |
| R.CNSDLRN#K.T                     | 0.37  | 1.411 |
| K.EIFVAN#GTQGK.L                  | -0.48 | 3.12  |
| R.SVNPN#DTCLASCVK.S               | -0.1  | 3.365 |
| R.N#TTEVVNTMCGYK.T                | -0.02 | 2.855 |
| R.GYYN#QSEAGSHTVQR.M              | -0.34 | 2.732 |
| K.DFEDLYTPVN#GSIVIVR.A            | 1.29  | 5.817 |
| K.QNN#GAFN#ETLFR.N                | 0.38  | 3.538 |
| R.KQNNGAFN#ETLFR.N                | 0.12  | 2.877 |
| K.GEN#FTETDVK.M                   | -0.22 | 2.578 |
| K.VGVN#GFGR.I                     | 0.87  | 2.754 |
| K.VIPELN#GK.L                     | -1.12 | 2.502 |
| R.GHCWGPPTQCVN#CSQFLR.G           | -0.07 | 5.521 |
| K.LEWLGN#CSGLNDETYGYK.E           | 0.56  | 2.832 |
| R.VLGFKPKPPKN#ESLETYPVM*K.Y       | -0.19 | 4.809 |
| K.YLQPLLAQFTN#LTM*DTEIR.I         | -1.81 | 1.941 |
| R.SLSSAIN#ASTGNYLLESVNKLFGEK.S    | 0.67  | 1.475 |
| R.AN#LTVVLLR.G                    | 0.95  | 2.677 |
| R.LNPTVITYGN#DSFSAK.A             | 0.06  | 1.948 |
| K.LRN#PCTSEQNCTSPFSYK.N           | 0.1   | 2.201 |
| K.LRNPCTSEQN#CTSPFSYK.N           | 0.32  | 4.176 |
| K.NGVN#GTGENGR.K                  | -0.8  | 4.275 |
| K.CHEGN#GTFECGACR.C               | -0.66 | 1.325 |

|                                    |       |       |
|------------------------------------|-------|-------|
| R.KEN#SSEICSNNGECVCGQCVCR.K        | -0.74 | 4.457 |
| R.KEN#SSEICSN#NGECVCGQCVCR.K       | 1.01  | 1.079 |
| K.DTCTQECSYFN#ITK.V                | 0.16  | 2.573 |
| R.GLSPGN#YSVR.I                    | -0.02 | 3.314 |
| R.SIVYSCEWPLYM*WPFQKPN#YTEIR.Q     | -0.56 | 2.229 |
| R.VYPELPKPSISSN#NSKPVEDK.D         | -0.84 | 3.657 |
| R.TLTLFN#VTR.N                     | 0.89  | 3.814 |
| R.RSDSVILNVLYGPDAPTISPLN#TSYR.S    | 6.66  | 5.042 |
| R.LQLSNDN#R.T                      | -0.45 | 3.451 |
| K.TITVSAELPKPSISSN#NSKPVEDK.D      | -0.21 | 4.228 |
| R.AYVCGIQNSVSAN#R.S                | -1.15 | 1.597 |
| K.ITPNNN#GTYACFVSN#LATGRNNSIVK.S   | 0.61  | 1.921 |
| K.ITPNNN#GTYACFVSN#LATGRNNSIVK.S   | 0.61  | 1.921 |
| R.N#NSIVK.S                        | -0.65 | 2.48  |
| K.AN#TTQPGIVEGGQVLK.C              | -0.61 | 3.755 |
| K.N#MTISR.G                        | -0.26 | 1.986 |
| K.TEN#QTR.Q                        | -0.28 | 1.688 |
| K.ISSLQTTEKN#DTVAGQGER.D           | -0.31 | 3.126 |
| K.ENQN#HSYSLK.S                    | -0.69 | 1.631 |
| K.RACTENNECCHPECLGSCSAPDN#DTACVACR | -0.34 | 7.519 |
| R.N#GSQSMYCIPCEGPCPK.V             | -0.05 | 1.318 |
| R.TN#ASVPSIPLDVLSASN#SSSQLIVK.W    | 2.11  | 1.624 |
| R.TN#ASVPSIPLDVLSASN#SSSQLIVK.W    | 2.11  | 1.624 |
| K.WNPPSLPN#GN#LSYYIVR.W            | -3.05 | 2.636 |
| K.WNPPSLPN#GN#LSYYIVR.W            | -3.05 | 2.636 |
| K.RRDVMQVAN#TTMSSR.S               | 1.92  | 1.709 |
| R.SRN#TTAADTYN#ITDPEELETEYPPFESR.V | -0.82 | 5.685 |
| R.SRN#TTAADTYN#ITDPEELETEYPPFESR.V | -0.82 | 5.685 |
| R.LNPGN#YTAR.I                     | 0.07  | 2.978 |
| R.IQATSLSGN#GSWTDPVFFYVQAK.T       | 5.67  | 2.218 |
| K.GSQWSDIEEFCN#RSCEVPTR.L          | 0.13  | 3.344 |
| K.DASSFLAEWQN#ITK.G                | -0.46 | 3.104 |
| K.GFSEDRLLIAGTN#SSDLQQILSLLESNK.D  | -0.58 | 6.423 |
| K.SLVTQYLN#ATGNR.W                 | 0.06  | 3.85  |
| K.SLVTQYLNATGN#R.W                 | 2.12  | 1.959 |
| R.SCIN#ESAIDSR.G                   | -0.49 | 2.121 |
| K.EIAN#ATAKPEDRNDPMLLYNK.M         | 1.5   | 3.705 |
| K.GN#LTYGYVTILN#GSDIR.S            | 10.22 | 2.461 |
| K.GN#LTYGYVTILN#GSDIR.S            | 10.22 | 2.461 |
| K.IYLRN#ESEFRDK.L                  | -0.19 | 4.523 |
| K.NLN#NSQSDVVSFR.L                 | 0.77  | 2.817 |

|                                     |       |       |
|-------------------------------------|-------|-------|
| R.VTGLN#CTTNHPINPK.G                | 0.05  | 3.396 |
| K.NN#HTASILDR.M                     | -0.63 | 1.529 |
| K.ARQCN#QTSVCWCVNSVGVR.R            | 0.02  | 2.909 |
| R.HRPTAGAFN#HSDLDAELRR.L            | -0.14 | 6.043 |
| K.FVAAVHYEQPTIQIELRQN#TSQK.A        | -0.68 | 3.745 |
| R.DINSQQELQN#ITTDTR.F               | -0.09 | 2.167 |
| R.EIRHN#STGCLR.M                    | -0.85 | 2.716 |
| R.EGFVGNRCDQCEENYFYN#R.S            | -1.05 | 2.972 |
| R.VN#NTLSSQISR.L                    | 0.46  | 1.607 |
| R.KIPAIN#QTITEANEK.T                | 0.22  | 3.782 |
| K.N#ATSTK.A                         | -0.41 | 2.348 |
| K.VIEEFYN#QTVVHR.Y                  | -1.76 | 3.698 |
| K.N#MTFDLPSDATVVLN#R.S              | 2.38  | 4.027 |
| K.N#MTFDLPSDATVVLN#R.S              | 2.38  | 4.027 |
| R.SSCGKEN#TSDPSLVIAFGR.G            | -0.4  | 3.097 |
| R.GHTLTLN#FTR.N                     | 0.16  | 4.093 |
| R.KDN#TTVTR.L                       | -0.36 | 2.096 |
| R.FFLQGIQLN#TILPDARDPAFK.A          | -0.76 | 5.366 |
| K.TAGVN#TTDK.E                      | -0.05 | 1.371 |
| R.YHN#QTLR.Y                        | 0.22  | 1.453 |
| K.GYPCGGN#K.T                       | -1.19 | 1.675 |
| K.RQQYNALLSN#MSR.I                  | -2.07 | 6.046 |
| K.NMQIAN#HTLK.Y                     | -0.7  | 3.408 |
| K.WQMN#FTVR.Y                       | -0.56 | 2.248 |
| R.YETTN#K.T                         | -0.54 | 2.116 |
| K.IAVQFGPGFSWIAN#FTK.A              | -0.51 | 3.498 |
| R.LN#SSTIK.Y                        | -0.85 | 2.754 |
| R.VQPFN#VTQGK.Y                     | -0.26 | 2.193 |
| K.TAVN#CSSDFDACLITK.A               | -0.21 | 1.708 |
| R.MN#GSEIQYK.I                      | -0.79 | 2.076 |
| K.AFN#STLPTMAQMEK.A                 | -0.82 | 1.554 |
| R.CSFRDEDDDDCTYSYTMEGDGAPGPN#STVLVH | -1.87 | 4.917 |
| K.AEM*N#GSK.L                       | -2.2  | 1.388 |
| K.QCN#GTSMCWCVNTAGVR.R              | -0.72 | 2.28  |
| K.FITSILYENNVITIDL VQN#SSQK.T       | -1.16 | 1.482 |
| K.LSGCQN#ITSTK.C                    | -2.95 | 1.339 |
| K.N#SSGVEER.I                       | -1.82 | 2.678 |
| K.LNLQTSTSIPN#VTEMK.T               | 0.82  | 2.204 |
| R.YFFN#VSDEAALLEK.A                 | -0.14 | 2.862 |
| K.GEYFVN#VTTR.I                     | 0.48  | 1.877 |
| K.CHAGYIGDNCN#CSTDISTCR.G           | -0.4  | 2.915 |

|                                  |       |       |
|----------------------------------|-------|-------|
| K.EVEVN#SSK.C                    | -0.61 | 1.351 |
| K.RN#STSIYFK.M                   | -0.12 | 3.527 |
| K.YIHPQN#NSICCTK.C               | -2.35 | 1.578 |
| K.RLKPLFN#K.S                    | -0.8  | 3.755 |
| R.EAGN#HTSGAGLVQINK.S            | -0.19 | 2.446 |
| K.LDN#YSTQELGK.T                 | -0.32 | 2.072 |
| K.DGVHLGPNN#R.T                  | -0.45 | 1.937 |
| K.NLN#VTSLGFR.S                  | -0.69 | 4.152 |
| K.VCDPLCSSGGCWGPGPGQCLSCRN#YSR.G | 0.31  | 2.035 |
| K.YPDVQNECRPCHEN#CTQGCK.G        | -0.63 | 2.079 |
| K.AIHYALN#CCGLAGGVEQFISDICPK.K   | -0.55 | 4.689 |
| R.QVLN#ITDK.D                    | -1.03 | 3.485 |
| K.MN#ASFSLK.S                    | -0.09 | 1.892 |
| K.MYN#GSVPFEER.I                 | -0.07 | 2.779 |
| R.N#LSCREPNQHFKPYLK.H            | -0.78 | 3.752 |
| K.QLSCVANQN#GSQADCELGNPFKR.N     | 0.2   | 4.682 |
| K.TVTSASNN#ETYCR.S               | -0.87 | 2.725 |
| R.LCDEGHGLEVEIN#CTR.T            | -1.03 | 2.958 |
| R.CKPNFFCN#STVCEHCDPCTK.C        | 0.47  | 4.059 |
| R.MN#ITVK.N                      | -0.75 | 2.163 |
| K.N#ITIVTGAPR.H                  | 0.15  | 3.587 |
| R.N#ITLAYTLEADRDR.R              | -0.43 | 2.712 |
| K.LLLSIN#VTNTR.T                 | -0.28 | 2.644 |
| R.TSIPTINMEN#K.T                 | -0.07 | 2.925 |
| R.N#CSCQCEDNRGPK.G               | -0.37 | 2.167 |
| K.GFCEAPGN#R.T                   | -0.68 | 1.364 |
| K.ELSEYN#ATAIK.S                 | 0.47  | 3.095 |
| R.GYYN#QSEAGSHTLQR.M             | -0.14 | 4.056 |
| K.NWQLTEEDFGN#TSGR.L             | 0.36  | 3.668 |
| R.LCLNN#DTK.E                    | -0.39 | 3.039 |
| R.M*QQLPAYQGEGPYCN#R.T           | -0.13 | 2.002 |
| R.VTYQNH#K.T                     | -0.12 | 1.585 |
| K.VPGN#QTSTTLK.L                 | -0.35 | 2.732 |
| R.GYN#VTYWR.E                    | -0.82 | 3.305 |
| R.SFDDHFQHLLN#DSER.T             | 0.3   | 4.996 |
| K.ILLTCSLN#DSATEVTGHR.W          | -0.25 | 4.915 |
| K.ALMN#GSESR.F                   | -0.22 | 2.745 |
| R.CN#GTSSK.G                     | -0.34 | 2.442 |
| K.EQYTIIN#R.T                    | -0.66 | 1.621 |
| K.N#LSCIVNEGK.K                  | -0.65 | 2.297 |
| K.HLLEN#STASVSEAERK.A            | -0.79 | 3.472 |

|                                |       |       |
|--------------------------------|-------|-------|
| R.ACM*N#ETRIEELR.A             | -0.34 | 1.951 |
| R.LGGWN#ITGPWAK.D              | 0.91  | 3.264 |
| K.NSN#SNVIQVDQSGGLPSR.D        | -1.18 | 2.465 |
| R.DYYLN#K.T                    | -0.96 | 1.801 |
| R.FFN#FSWR.V                   | 0.42  | 3.672 |
| K.N#SSVEAFKR.Q                 | -0.5  | 2.522 |
| K.RQTECMVEQYSN#YSVNGEPVNGR.H   | -0.44 | 5.96  |
| R.WCPQNSSCVN#ATACR.C           | -1.02 | 1.377 |
| R.GDKN#VTMGQSSAR.M             | 0.1   | 3.164 |
| R.SLSN#STAR.N                  | -0.55 | 2.543 |
| R.TQN#FTLLVQGSPELK.T           | -3.66 | 3.387 |
| K.LCDYENRFN#TSK.G              | 0.37  | 3.035 |
| K.LAPN#LTEL.R.A                | 0.22  | 3.865 |
| K.N#ISASAR.E                   | -4.29 | 2.773 |
| R.TCN#ASQGFKR.W                | -0.83 | 2.494 |
| K.N#VSCLWCNTN.K.A              | -0.16 | 2.895 |
| K.FLKPYTLEEQKN#LTVCPDGALFEQK.G | -8.85 | 4.664 |
| K.KLHVGYLQPLVAVQVSFAPN#NTGK.E  | -3.62 | 2.325 |
| R.DATGNVN#DTIVTEL TN#CTSAACK.L | 0.19  | 4.033 |
| R.DATGNVN#DTIVTEL TN#CTSAACK.L | 0.19  | 4.033 |
| R.N#TSAASTAQLVEATEELRR.E       | 1.35  | 5.342 |
| R.RAN#TSALAVPSPVNSASAR.H       | -0.3  | 4.117 |
| K.QGWQNSIRHN#LSLNK.C           | -1.4  | 1.067 |
| K.ETN#FSLASGLEAK.D             | 0.1   | 2.316 |
| K.SN#VSGNTHLCISNGNYEK.E        | -0.31 | 4.375 |
| K.N#LTVYTGLWVK.C               | 4.88  | 3.425 |
| R.DDFFGHYACDQNGN#K.T           | -0.69 | 2.927 |
| K.MFSN#CSK.Q                   | -0.36 | 2.353 |
| K.CQEAIN#ATCK.G                | 0.1   | 2.171 |
| R.EQQLESCACN#ETDNSCK.V         | 1.79  | 1.123 |
| R.NTSPDTN#YTLYYWHR.S           | -1.57 | 1.901 |
| R.ALVN#FTR.S                   | -0.18 | 2.385 |
| R.AN#YTILK.G                   | -0.8  | 2.656 |
| K.AIN#DTAAR.L                  | -0.97 | 2.678 |
| K.CCN#TTK.C                    | -0.62 | 2.034 |
| R.DGYEPCVNEGMCVTYHN#GTGYCK.C   | -0.13 | 2.497 |
| R.AVN#SSCR.A                   | -0.28 | 2.303 |
| R.TCVSN#CTASQFVCK.N            | -0.47 | 1.341 |
| K.QSGDVTCN#CTDGR.V             | -1.27 | 3.954 |
| K.AN#DSDQGANAEIETFHQAPEVRR.L   | 0.88  | 2.389 |
| K.GN#LTFTAQYLSYR.I             | 0.15  | 3.536 |

|                                      |       |       |
|--------------------------------------|-------|-------|
| K.N#GTDEK.F                          | -0.69 | 1.967 |
| K.GRDIYTFDGALN#K.S                   | 0.14  | 3.788 |
| K.SDAVSHTGN#YTCEVTELTR.E             | -0.18 | 3.098 |
| K.AALSWSNGN#GTASCR.V                 | -0.8  | 1.498 |
| R.YN#ATVYSQAAN#GTEGQPQAIEFR.T        | 0.69  | 2.472 |
| R.YN#ATVYSQAAN#GTEGQPQAIEFR.T        | 0.69  | 2.472 |
| K.VSDN#ESSN#YTYK.I                   | 0.48  | 1.232 |
| K.VSDN#ESSN#YTYK.I                   | 0.48  | 1.232 |
| K.IHVAGETDSSNLN#VSEPR.A              | -0.76 | 2.122 |
| K.GPN#GTEGASR.T                      | 0.11  | 3.683 |
| K.QTDVIN#ASWWVM*SN#K.T               | -0.02 | 1.472 |
| K.QTDVIN#ASWWVM*SN#K.T               | -0.02 | 1.472 |
| R.ATVFAN#GSLLLTQVRPR.N               | -4.77 | 3.108 |
| R.RQDVN#ITVATVPSWLK.K                | -0.63 | 4.174 |
| R.VTRDDAGN#YTCIASNGPQGQIR.A          | -0.19 | 3.492 |
| R.KVEAEALN#ATAIR.V                   | -0.91 | 2.837 |
| R.YGEN#NSLSVEGFRK.L                  | 3.09  | 5.437 |
| R.KTN#ESVSEPRK.G                     | -1.03 | 3.867 |
| R.NTNENPQECFN#ASK.L                  | -0.61 | 1.262 |
| R.N#FSSCSAEDFEK.L                    | 2.68  | 1.185 |
| K.YRDFQHLLN#R.T                      | 0.02  | 4.288 |
| K.TCIMEASTDFLPGLN#FSN#CSR.R          | -3.24 | 2.345 |
| K.TCIMEASTDFLPGLN#FSN#CSR.R          | -3.24 | 2.345 |
| R.N#LTEVPTDLPAYVR.N                  | -0.71 | 2.078 |
| R.QLDLSHNPLADLSPFAFSGSN#ASVSAPSPLVEI | 3.04  | 3.456 |
| R.QLDLSHNPLADLSPFAFSGSN#ASVSAPSPLVEI | 2.1   | 1.683 |
| R.QLDLSHNPLADLSPFAFSGSN#ASVSAPSPLVEI | 3.04  | 3.456 |
| R.N#LTHLESLHLEDNALK.V                | 0.19  | 5.172 |
| K.VLHN#GTLAELQGLPHIR.V               | -1.08 | 6.98  |
| R.LNLSEN#YTLSISNAR.I                 | 0.56  | 2.464 |
| K.KLGDCISEDSPYDGN#ITWYR.N            | 0.13  | 4.229 |
| K.EGDN#ITLK.C                        | -0.28 | 1.069 |
| R.N#ATGDYK.C                         | -0.08 | 1.881 |
| R.N#ATVVWM*K.D                       | 2.11  | 1.221 |
| K.IISPEEN#VTLTCTAENQLER.T            | -0.94 | 5.03  |
| R.TVNSLN#VSANENR.E                   | -0.98 | 4.077 |
| R.FLSDFRDLM*SWIN#GIR.G               | 2.16  | 2.763 |
| K.LAFAFGDRN#CSTITLQN#ITR.G           | -3.42 | 6.829 |
| K.LAFAFGDRN#CSTITLQN#ITR.G           | -3.42 | 6.829 |
| K.DTGELN#VTSILDREETPFFLLTGYALDAR.G   | 0.12  | 5.433 |
| K.IN#ATDADEPNTLSK.I                  | -0.23 | 2.946 |

|                                  |       |       |
|----------------------------------|-------|-------|
| R.YVQN#GTYTVK.I                  | -0.3  | 3.929 |
| R.LAGAGN#STAR.I                  | -1.2  | 3.412 |
| K.NDRN#SSDETFLK.D                | -0.85 | 2.389 |
| R.GN#VTQHVQGHR.N                 | -0.3  | 3.739 |
| K.STN#GSK.Q                      | -0.29 | 2.354 |
| R.NPN#GTVTVISR.Y                 | -0.14 | 2.683 |
| K.GVEAQN#R.T                     | -0.98 | 3.512 |
| R.RIAVDWESLGYN#ITR.C             | -4.17 | 4.686 |
| K.FIN#CTK.I                      | -0.56 | 2.124 |
| K.MEDGLLTCHGPGPDN#CTK.C          | -0.09 | 3.518 |
| R.SYSTTYEERN#ITGTR.V             | -0.59 | 3.626 |
| K.ENLPGDPTSN#ATSR.G              | -0.35 | 1.622 |
| K.QPVSPVIHPPVSYN#DTAPR.I         | -1.36 | 3.81  |
| K.GQTEIQVNCPPAVTEN#K.T           | -0.2  | 1.987 |
| R.AKPQGQWAEDVLGN#KTWDRETR.D      | 0     | 3.535 |
| R.VCEIHEDN#STR.S                 | -2.09 | 3.028 |
| R.TVPPMVN#VTR.S                  | -0.53 | 2.894 |
| R.SEASEGN#ITVTCR.A               | -0.51 | 1.895 |
| K.FRNPLVN#GSLALAFQGTAPPPNWR.R    | 10.82 | 7.523 |
| R.RPVYELSPDPN#NTGFINQDFVVWM*R.T  | -3.98 | 4.302 |
| R.IRQGN#YSAGLPR.G                | -0.66 | 4.843 |
| R.ESRPPPGPGPGN#TTR.F             | -0.46 | 3.955 |
| K.NIN#GTDPIQK.Y                  | -0.42 | 2.634 |
| K.GNPYSDLGN#HTTCR.Y              | -0.34 | 1.875 |
| K.N#VTNQIALLK.L                  | -0.65 | 3.465 |
| K.NNFN#CTR.R                     | -5.46 | 2.439 |
| R.VISAGGN#DSR.S                  | 0.3   | 2.002 |
| R.ISWEEYN#RTNTR.V                | -0.31 | 3.067 |
| R.CEPTFVN#TSR.S                  | -0.44 | 1.304 |
| R.KN#SSQAR.D                     | -1.3  | 2.004 |
| R.STNN#NTK.F                     | -0.08 | 2.481 |
| K.VLGQSQEPNVNPASAGN#QTQK.T       | -0.2  | 1.867 |
| K.QLVHSFAEGQDQGSAYAN#R.T         | -0.29 | 2.964 |
| R.TALFPDLLAQGN#ASLR.L            | -1.85 | 3.1   |
| R.VVLGAN#GTYSCLVR.N              | -0.35 | 1.584 |
| R.DQGSAYAN#R.T                   | -0.24 | 3.123 |
| K.QVLAN#K.S                      | -0.33 | 2.686 |
| R.LHEITN#ETFR.G                  | 0.17  | 2.882 |
| K.KLN#VTTAWK.A                   | -0.17 | 5.874 |
| R.LYGYSLGN#ISSNLISFTEVDDAETLHK.S | -0.9  | 4.354 |
| R.GN#TSGVLVVLTK.F                | 0.09  | 2.422 |

|                                     |       |       |
|-------------------------------------|-------|-------|
| K.NITLERPSN#VN#LTCQFTTSGDLNAV#VTWK  | 7.07  | 3.485 |
| K.NITLERPSN#VN#LTCQFTTSGDLNAV#VTWK  | 7.07  | 3.485 |
| K.NITLERPSN#VN#LTCQFTTSGDLNAV#VTWK  | 7.07  | 3.485 |
| K.YVIN#GTIAN#ETK.L                  | -0.83 | 3.271 |
| K.YVIN#GTIAN#ETK.L                  | -0.83 | 3.271 |
| K.EVPRN#DTCPELPPPEWGWR.T            | -1.02 | 4.846 |
| K.TNN#STCQPCPYGSYSN#GSDCTR.C        | -0.08 | 1.738 |
| K.TNN#STCQPCPYGSYSN#GSDCTR.C        | -0.08 | 1.738 |
| R.TFNYN#FSALANTVTLAGGPSFTSK.G       | 3.8   | 1.321 |
| K.GN#GTILK.G                        | 0.32  | 1.725 |
| R.TQDEILFSN#STR.L                   | -0.37 | 2.403 |
| K.IN#YTVPQSGTFK.I                   | 0.1   | 2.546 |
| R.QVYAN#R.S                         | 0.22  | 1.988 |
| R.KEDFN#QTLTSNEQTSR.A               | -0.53 | 1.875 |
| R.N#MSCSIN#NTLLGQKK.E               | 1.7   | 4.036 |
| R.N#MSCSIN#NTLLGQKK.E               | 1.7   | 4.036 |
| R.TN#QSIM*VQWQPPPTEHNGVLR.G         | -1.04 | 3.43  |
| K.N#LTSHTK.Y                        | -0.19 | 2.641 |
| K.GFN#ASYIR.V                       | -0.47 | 2.234 |
| K.NN#ESLDEGLRLHTVNV.R.Q             | -0.48 | 4.123 |
| K.DWSQNMVFN#CSEDNPSRER.C            | -1.57 | 2.323 |
| K.GVLMVGN#ETTYEDGHGSRKN#ITDLVEGAK.] | 0.57  | 3.728 |
| K.N#ITDLVEGAK.K                     | -1.11 | 1.999 |
| K.TCNPETFPSSN#ESR.Q                 | -0.3  | 3.584 |
| K.DSCN#DSFR.G                       | -0.27 | 2.483 |
| R.TFAVYLN#STGYR.T                   | 1.09  | 2.375 |
| R.FYN#YTLCR.N                       | -0.35 | 3.039 |
| R.N#LTQPEVIIQPSSR.H                 | -0.21 | 3.176 |
| R.N#VSECFLAR.E                      | 2.45  | 2.633 |
| K.N#LTLWCR.S                        | 0.38  | 2.943 |
| K.NYPGTYPN#HTVCEK.T                 | -0.13 | 2.997 |
| K.GHPNLQVQVN#SSEK.L                 | 1.71  | 1.441 |
| K.QEAKEN#GTN#LTFIGDK.T              | -0.13 | 2.389 |
| K.QEAKEN#GTN#LTFIGDK.T              | -0.13 | 2.389 |
| R.RN#ASAVVLYNEER.Y                  | 0.02  | 3.69  |
| R.LFGPGFAN#SSWSWVAPEGAGCREEAASPAGE  | -0.32 | 1.93  |
| R.QTLFFN#GTR.A                      | -0.37 | 3.429 |
| R.WN#RGNESLPER.A                    | -0.63 | 4.073 |
| R.WNRGN#ESLPER.A                    | -0.39 | 1.611 |
| K.DGGLPSLQSN#ATVR.V                 | 0.23  | 1.735 |
| K.N#TSGSNQQAFLLENVPCNN#ASCEEARR.M   | 0.21  | 3.408 |

|                                   |       |       |
|-----------------------------------|-------|-------|
| K.N#TSGSNQQAFLLENVPCNN#ASCEEARR.M | 0.21  | 3.408 |
| R.TTLVDNNTWNN#SHIALVGK.A          | -0.03 | 2.716 |
| K.DFRDMN#QTLGDN#ITVK.M            | -0.59 | 3.098 |
| K.DFRDMN#QTLGDN#ITVK.M            | -0.59 | 3.098 |
| K.SN#ITFNNN#DTVSFLEYR.T           | -0.62 | 5.071 |
| K.SN#ITFNNN#DTVSFLEYR.T           | -0.62 | 5.071 |
| R.CAPVN#ISCYAK.F                  | 0.14  | 3.588 |
| K.AGN#TTESK.I                     | -0.65 | 2.717 |
| R.KFN#TTER.V                      | -1.51 | 1.594 |
| R.ELYN#GTADITLR.F                 | -0.47 | 1.293 |
| K.HM*LALAPN#STAR.R                | -0.48 | 2.007 |
| R.TSLELWMHTDPVSQKN#ESVR.N         | -0.67 | 5.705 |
| R.RPN#QSQPLPPSSLQR.F              | -0.56 | 1.443 |
| K.DLYEYSWVQGPHSN#ETDRLPR.C        | 1.09  | 5.311 |
| R.FN#HTQTIQQK.Q                   | -0.54 | 1.945 |
| R.ERPPTFLTPEGN#ASNK.E             | -1.44 | 4.832 |
| R.VNVVN#STLAEVHWDVPVPLK.S         | -4.76 | 4.591 |
| R.AAN#YTSSLNLPDK.T                | -0.18 | 2.974 |
| R.CGN#GTLPAYN#GSECR.S             | -0.14 | 1.958 |
| R.CGN#GTLPAYN#GSECR.S             | -0.14 | 1.958 |
| R.SFAGPGAPFPMN#R.S                | -0.4  | 4.732 |
| K.TMFN#STDIK.L                    | 2.09  | 2.104 |
| R.FSADLGYN#GTR.Q                  | -0.66 | 4.023 |
| K.CLSEGOPPPSYN#WTR.L              | -0.15 | 1.583 |
| R.ITFKPIAPSGQN#ATCTR.Y            | -0.01 | 2.091 |
| K.SGILRN#DSTVPDQFQCK.L            | -0.22 | 3.087 |
| K.DITDLIN#NTFIR.T                 | 0.11  | 2.486 |
| K.GVAVTN#TSK.L                    | -0.48 | 2.328 |
| R.QRYPAN#CTVR.D                   | -3.5  | 3.531 |
| R.LLGN#SSR.A                      | -0.61 | 1.936 |
| -.M*YN#GSCCR.I                    | -0.19 | 1.468 |
| K.VSLTN#VSIISDEGR.Y               | -0.04 | 3.164 |
| K.SPAN#GSLGPTLN#LSSGESR.L         | -0.39 | 2.888 |
| K.SPAN#GSLGPTLN#LSSGESR.L         | -0.39 | 2.888 |
| K.NN#QTECFNFIR.F                  | 0.01  | 3.286 |
| R.FLQPYN#ASHLYVCGTYAFQPK.C        | 1.56  | 3.247 |
| R.DPYCAWSVN#TSR.C                 | -0.28 | 1.453 |
| K.APPRN#YSVIVMFTALQLHR.Q          | 6.45  | 6.879 |
| K.NTN#SSNN#FSR.S                  | -4.05 | 2.58  |
| K.NTN#SSNN#FSR.S                  | -4.05 | 2.58  |
| K.SDPHWESMLN#ATTR.R               | -0.01 | 3.344 |

|                                      |       |       |
|--------------------------------------|-------|-------|
| R.YKPDTLAVAVEN#GTGTDR.Q              | -0.27 | 2.566 |
| K.LAWEGN#ETVTTR.L                    | -0.99 | 2.338 |
| R.FLN#ATCDEYFTRN#NVTEIQGIPGAASGLIK.E | 0.72  | 2.564 |
| R.FLNATCDEYFTRN#N#VTEIQGIPGAASGLIK.E | 0.72  | 2.336 |
| R.FLNATCDEYFTRN#N#VTEIQGIPGAASGLIK.E | 0.72  | 2.336 |
| K.DFN#ETQLAR.I                       | -0.06 | 3.037 |
| R.VYGQNINN#ETWSR.I                   | -0.45 | 3.844 |
| K.IVASDSGKPSLN#QTALVR.V              | -0.37 | 4.332 |
| K.N#CTEPALHEFPNDIFTNEDRR.Q           | -0.97 | 4.103 |
| R.GWSCTDN#STAQTVAQQR.A               | -0.38 | 1.264 |
| R.LLDRNDNPPVLGNFEILFNYYVTN#R.S       | -0.76 | 9.425 |
| R.GNELSLVLLN#ASTGELK.L               | 8.03  | 2.38  |
| R.FGSVLGN#YSCAAQGTQGGSKK.S           | 1.28  | 5.352 |
| R.HIDMADFIANN#GTVPGCPAKK.N           | -1.8  | 2.23  |
| R.LHGLHLSN#ITVGGIPGPAGGVAR.G         | -1.13 | 5.644 |
| K.GFDPDCN#K.T                        | -0.6  | 2.562 |
| R.GWLPPNLFN#CTSITFSELK.G             | 4.17  | 1.812 |
| R.LQRN#ESGLDSGR.S                    | -0.36 | 4.312 |
| R.N#ATQHTAGYFGSDVK.V                 | -0.1  | 2     |
| R.AGPN#GTLFVADAYK.G                  | -0.01 | 2.477 |
| K.DVLWFRPTLLN#DTGN#YTCMLR.N          | 8.73  | 4.961 |
| K.DVLWFRPTLLN#DTGN#YTCMLR.N          | 8.73  | 4.961 |
| R.N#TTYCSK.V                         | -0.85 | 2.045 |
| R.KIN#SSLQLPDR.V                     | -0.09 | 3.631 |
| K.CLSPDVTPCFCTIN#FTLEK.S             | -3.07 | 1.824 |
| R.YSLN#VTYNYPVHYFDGR.K               | 0.36  | 1.971 |
| K.DIGN#YSCAAQGTQTGSKK.S              | -0.77 | 3.336 |
| K.NVDMAGFIANN#GTR.E                  | -1.42 | 3.753 |
| K.GFDPDCNKTN#GQCQCK.E                | -0.27 | 1.086 |
| K.LSRN#ETQVDGAR.A                    | -0.56 | 3.212 |
| K.VFFNLVN#LTELVLVR.N                 | -0.45 | 2.353 |
| K.N#GSTIYGECGVCPR.G                  | 1.28  | 2.133 |
| R.EAVNDCDIRETCSGN#SSQCAPNIHK.M       | -0.7  | 2.239 |
| K.N#VSVAEGK.E                        | -0.28 | 1.453 |
| K.ELDLTCN#ITDRADDVRPEVTWSFSR.M       | -0.03 | 4.501 |
| K.QRN#NSWVK.S                        | -0.36 | 3.555 |
| R.YSVLIMAEKPVGDLSSPN#ETK.Y           | 1.54  | 5.405 |
| K.LEN#WTDASR.V                       | -0.84 | 2.312 |
| K.SELVN#ETR.W                        | -0.19 | 2.927 |
| R.AQPGTMSN#GTETR.G                   | -0.76 | 1.261 |
| R.KMSN#ITFLNFDPPIEEFHQYYQHIVTTLVK.G  | 0.19  | 5.349 |

|                                    |       |       |
|------------------------------------|-------|-------|
| K.ILESERFDTHEYRN#ESR.R             | -0.97 | 2.573 |
| K.TTN#SSAADPR.E                    | -0.37 | 3.214 |
| R.QN#GSLSK.I                       | -0.63 | 1.506 |
| K.EINN#MTVPSK.L                    | -0.12 | 2.881 |
| R.WGAEGRDVCAAN#GSGGDEGPDPDLICR.N   | -0.55 | 1.65  |
| K.YN#YTEDPTILR.I                   | 0.67  | 2.542 |
| K.DLNEDDHHHECLN#VTQLLK.Y           | -0.36 | 3.815 |
| R.CLHN#GTCVDLVGGFR.C               | -0.46 | 5.553 |
| K.N#CSSWSDK.N                      | 0.31  | 1.597 |
| R.SPIVTHCN#VSTVNK.G                | 0.31  | 4.235 |
| K.GIQEIIQM*N#K.S                   | -0.03 | 3.149 |
| K.FPVHGAGELCVGQN#TSDK.G            | -1.24 | 2.918 |
| R.RGN#ISAVAVR.F                    | -0.33 | 3.066 |
| K.INLN#ESMQVVSR.R                  | 0.27  | 3.122 |
| K.AN#FTIYDCSR.T                    | -0.4  | 2.817 |
| K.N#ATLAEQAK.L                     | -0.59 | 2.772 |
| K.N#GTRAEPPLN#ASASDQGEK.V          | -0.65 | 1.258 |
| R.AEPPLN#ASASDQGEK.V               | -0.43 | 1.757 |
| R.LLN#LTNPEASTSVLM*AVTHTLTQYPDFR.G | 1.46  | 2.59  |
| R.GFSTQVLLGDVYQSPCTMAQRPNFN#SSAR.V | 0.22  | 2.322 |
| R.CDGWADCTDHSDELN#CSCDAGHQFTCK.N   | -1.74 | 3.432 |
| K.N#ASNMEYR.I                      | -0.16 | 3.06  |
| K.AN#ATIEVK.A                      | -0.43 | 3.155 |
| K.EN#GMPM*DIVN#TSGR.F              | -0.62 | 1.014 |
| K.EN#GMPM*DIVN#TSGR.F              | -0.62 | 1.014 |
| K.N#SSQVLGEK.V                     | -0.49 | 2.211 |
| K.DN#ITAHNISWR.N                   | -0.25 | 3.861 |
| R.N#LTVSECK.K                      | -0.04 | 1.837 |

## s in Expt# 2

---

### **Annotation**

---

---

F1712\_HUMAN Protein FAM171A2  
K132L\_HUMAN UPF0577 protein KIAA1324-like  
PODXL\_HUMAN Podocalyxin  
LPP1\_HUMAN Lipid phosphate phosphohydrolase 1  
ADA10\_HUMAN Disintegrin and metalloproteinase domain-containing protein 10  
ADA10\_HUMAN Disintegrin and metalloproteinase domain-containing protein 10  
NRP1\_HUMAN Neuropilin-1  
NRP1\_HUMAN Neuropilin-1  
PLXB2\_HUMAN Plexin-B2  
LAMA5\_HUMAN Laminin subunit alpha-5  
LAMA5\_HUMAN Laminin subunit alpha-5  
LAMA5\_HUMAN Laminin subunit alpha-5  
NCAM2\_HUMAN Neural cell adhesion molecule 2  
NCAM2\_HUMAN Neural cell adhesion molecule 2  
NCAM2\_HUMAN Neural cell adhesion molecule 2  
TLR3\_HUMAN Toll-like receptor 3  
TLR3\_HUMAN Toll-like receptor 3  
TLR3\_HUMAN Toll-like receptor 3  
PLXB1\_HUMAN Plexin-B1  
GPR39\_HUMAN G-protein coupled receptor 39  
LPP2\_HUMAN Lipid phosphate phosphohydrolase 2  
MPZL2\_HUMAN Myelin protein zero-like protein 2  
TSN3\_HUMAN Tetraspanin-3  
TSN3\_HUMAN Tetraspanin-3  
H2B1K\_HUMAN Histone H2B type 1-K  
RAMP3\_HUMAN Receptor activity-modifying protein 3  
IGSF3\_HUMAN Immunoglobulin superfamily member 3

IGSF3\_HUMAN Immunoglobulin superfamily member 3  
ICOSL\_HUMAN ICOS ligand  
ICOSL\_HUMAN ICOS ligand  
ATRN\_HUMAN Attractin  
ATRN\_HUMAN Attractin  
ATRN\_HUMAN Attractin  
ATRN\_HUMAN Attractin  
ATRN\_HUMAN Attractin  
TSN9\_HUMAN Tetraspanin-9  
CBPD\_HUMAN Carboxypeptidase D  
S22A5\_HUMAN Solute carrier family 22 member 5  
S22A5\_HUMAN Solute carrier family 22 member 5  
PRS23\_HUMAN Serine protease 23  
S1PR2\_HUMAN Sphingosine 1-phosphate receptor 2  
UNC5C\_HUMAN Netrin receptor UNC5C  
CSPG5\_HUMAN Chondroitin sulfate proteoglycan 5  
LYPD3\_HUMAN Ly6/PLAUR domain-containing protein 3  
MPZL1\_HUMAN Myelin protein zero-like protein 1  
TSN13\_HUMAN Tetraspanin-13  
TSN15\_HUMAN Tetraspanin-15  
1A02\_HUMAN HLA class I histocompatibility antigen, A-2 alpha chain  
TFR1\_HUMAN Transferrin receptor protein 1  
TFR1\_HUMAN Transferrin receptor protein 1  
TFR1\_HUMAN Transferrin receptor protein 1  
PRIO\_HUMAN Major prion protein  
G3P\_HUMAN Glyceraldehyde-3-phosphate dehydrogenase  
G3P\_HUMAN Glyceraldehyde-3-phosphate dehydrogenase  
ERBB2\_HUMAN Receptor tyrosine-protein kinase erbB-2  
AT1B1\_HUMAN Sodium/potassium-transporting ATPase subunit beta-1  
AT1B1\_HUMAN Sodium/potassium-transporting ATPase subunit beta-1  
AT1B1\_HUMAN Sodium/potassium-transporting ATPase subunit beta-1  
PAI2\_HUMAN Plasminogen activator inhibitor 2  
ICAM1\_HUMAN Intercellular adhesion molecule 1  
ICAM1\_HUMAN Intercellular adhesion molecule 1  
ITB1\_HUMAN Integrin beta-1  
ITB1\_HUMAN Integrin beta-1  
ITB1\_HUMAN Integrin beta-1  
ITB1\_HUMAN Integrin beta-1



ITA5\_HUMAN Integrin alpha-5  
CD63\_HUMAN CD63 antigen  
TACD2\_HUMAN Tumor-associated calcium signal transducer 2  
TACD2\_HUMAN Tumor-associated calcium signal transducer 2  
TACD2\_HUMAN Tumor-associated calcium signal transducer 2  
PTPRF\_HUMAN Receptor-type tyrosine-protein phosphatase F  
CLUS\_HUMAN Clusterin  
LAMC1\_HUMAN Laminin subunit gamma-1  
LAMC1\_HUMAN Laminin subunit gamma-1  
LAMC1\_HUMAN Laminin subunit gamma-1  
LAMC1\_HUMAN Laminin subunit gamma-1  
GTR1\_HUMAN Solute carrier family 2, facilitated glucose transporter member 1  
LAMP1\_HUMAN Lysosome-associated membrane glycoprotein 1  
FGFR1\_HUMAN Fibroblast growth factor receptor 1  
MPRI\_HUMAN Cation-independent mannose-6-phosphate receptor  
MPRI\_HUMAN Cation-independent mannose-6-phosphate receptor  
ACE\_HUMAN Angiotensin-converting enzyme  
ACE\_HUMAN Angiotensin-converting enzyme  
LAMP2\_HUMAN Lysosome-associated membrane glycoprotein 2  
CD59\_HUMAN CD59 glycoprotein  
INGR1\_HUMAN Interferon gamma receptor 1  
CD44\_HUMAN CD44 antigen  
ITB4\_HUMAN Integrin beta-4  
EPCAM\_HUMAN Epithelial cell adhesion molecule  
EPCAM\_HUMAN Epithelial cell adhesion molecule  
EPCAM\_HUMAN Epithelial cell adhesion molecule  
INAR1\_HUMAN Interferon alpha/beta receptor 1  
INAR1\_HUMAN Interferon alpha/beta receptor 1  
ITA2\_HUMAN Integrin alpha-2  
ITA2\_HUMAN Integrin alpha-2  
ITA2\_HUMAN Integrin alpha-2  
ITB5\_HUMAN Integrin beta-5

ITB6\_HUMAN Integrin beta-6  
LFA3\_HUMAN Lymphocyte function-associated antigen 3  
TNFR1A\_HUMAN Tumor necrosis factor receptor superfamily member 1A  
MPRD\_HUMAN Cation-dependent mannose-6-phosphate receptor  
MPRD\_HUMAN Cation-dependent mannose-6-phosphate receptor  
5NTD\_HUMAN 5'-nucleotidase  
FGFR2\_HUMAN Fibroblast growth factor receptor 2  
ERBB3\_HUMAN Receptor tyrosine-protein kinase erbB-3  
ERBB3\_HUMAN Receptor tyrosine-protein kinase erbB-3  
ERBB3\_HUMAN Receptor tyrosine-protein kinase erbB-3  
CD9\_HUMAN CD9 antigen  
CADH3\_HUMAN Cadherin-3  
ENPP1\_HUMAN Ectonucleotide pyrophosphatase/phosphodiesterase family member 1  
ENPP1\_HUMAN Ectonucleotide pyrophosphatase/phosphodiesterase family member 1  
ENPP1\_HUMAN Ectonucleotide pyrophosphatase/phosphodiesterase family member 1  
ITA6\_HUMAN Integrin alpha-6  
ACKR3\_HUMAN Atypical chemokine receptor 3  
TNR6\_HUMAN Tumor necrosis factor receptor superfamily member 6  
TNR6\_HUMAN Tumor necrosis factor receptor superfamily member 6  
ITA3\_HUMAN Integrin alpha-3  
ITB8\_HUMAN Integrin beta-8  
CD82\_HUMAN CD82 antigen  
EPHB2\_HUMAN Ephrin type-B receptor 2  
1B15\_HUMAN HLA class I histocompatibility antigen, B-15 alpha chain  
CTR1\_HUMAN High affinity cationic amino acid transporter 1  
CTR1\_HUMAN High affinity cationic amino acid transporter 1  
CALCR\_HUMAN Calcitonin receptor  
L1CAM\_HUMAN Neural cell adhesion molecule L1  
L1CAM\_HUMAN Neural cell adhesion molecule L1  
L1CAM\_HUMAN Neural cell adhesion molecule L1  
GPC1\_HUMAN Glypican-1  
BASI\_HUMAN Basigin  
BASI\_HUMAN Basigin  
BASI\_HUMAN Basigin  
IL6RB\_HUMAN Interleukin-6 receptor subunit beta  
IL6RB\_HUMAN Interleukin-6 receptor subunit beta  
ECE1\_HUMAN Endothelin-converting enzyme 1

ECE1\_HUMAN Endothelin-converting enzyme 1  
ECE1\_HUMAN Endothelin-converting enzyme 1  
ECE1\_HUMAN Endothelin-converting enzyme 1  
ECE1\_HUMAN Endothelin-converting enzyme 1  
ECE1\_HUMAN Endothelin-converting enzyme 1  
ECE1\_HUMAN Endothelin-converting enzyme 1  
ECE1\_HUMAN Endothelin-converting enzyme 1  
CD97\_HUMAN CD97 antigen  
CD97\_HUMAN CD97 antigen  
SERPH\_HUMAN Serpin H1  
BCAM\_HUMAN Basal cell adhesion molecule  
CLCN5\_HUMAN H(+)/Cl(-) exchange transporter 5  
PLXA3\_HUMAN Plexin-A3  
CTR2\_HUMAN Low affinity cationic amino acid transporter 2  
EFNA3\_HUMAN Ephrin-A3  
PTTG\_HUMAN Pituitary tumor-transforming gene 1 protein-interacting protein  
AT1B3\_HUMAN Sodium/potassium-transporting ATPase subunit beta-3  
AT1B3\_HUMAN Sodium/potassium-transporting ATPase subunit beta-3  
S12A2\_HUMAN Solute carrier family 12 member 2  
S12A2\_HUMAN Solute carrier family 12 member 2  
LAMB2\_HUMAN Laminin subunit beta-2  
LAMB2\_HUMAN Laminin subunit beta-2  
FOXP1\_HUMAN Forkhead box protein G1  
GFRA1\_HUMAN GDNF family receptor alpha-1  
GFRA1\_HUMAN GDNF family receptor alpha-1  
CLD12\_HUMAN Claudin-12  
JAG1\_HUMAN Protein jagged-1  
ADA17\_HUMAN Disintegrin and metalloproteinase domain-containing protein 17  
ADA17\_HUMAN Disintegrin and metalloproteinase domain-containing protein 17  
ADA17\_HUMAN Disintegrin and metalloproteinase domain-containing protein 17  
IL13R1\_HUMAN Interleukin-13 receptor subunit alpha-1  
PGBM\_HUMAN Basement membrane-specific heparan sulfate proteoglycan core protein  
DSC2\_HUMAN Desmocollin-2  
DSC2\_HUMAN Desmocollin-2  
UPAR\_HUMAN Urokinase plasminogen activator surface receptor  
NOTCH2\_HUMAN Neurogenic locus notch homolog protein 2  
LRP1\_HUMAN Prolow-density lipoprotein receptor-related protein 1  
LRP1\_HUMAN Prolow-density lipoprotein receptor-related protein 1  
LRP1\_HUMAN Prolow-density lipoprotein receptor-related protein 1  
PCDH1\_HUMAN Protocadherin-1  
IL10R2\_HUMAN Interleukin-10 receptor subunit beta

I10R2\_HUMAN Interleukin-10 receptor subunit beta  
CD47\_HUMAN Leukocyte surface antigen CD47  
CD47\_HUMAN Leukocyte surface antigen CD47  
PTPRJ\_HUMAN Receptor-type tyrosine-protein phosphatase eta  
TSN31\_HUMAN Tetraspanin-31  
TSN31\_HUMAN Tetraspanin-31  
PTK7\_HUMAN Inactive tyrosine-protein kinase 7  
PTK7\_HUMAN Inactive tyrosine-protein kinase 7  
PTK7\_HUMAN Inactive tyrosine-protein kinase 7  
PTPRS\_HUMAN Receptor-type tyrosine-protein phosphatase S  
S39A6\_HUMAN Zinc transporter ZIP6  
S39A6\_HUMAN Zinc transporter ZIP6  
S39A6\_HUMAN Zinc transporter ZIP6  
ADAM9\_HUMAN Disintegrin and metalloproteinase domain-containing protein 9  
ADA15\_HUMAN Disintegrin and metalloproteinase domain-containing protein 15  
ADA15\_HUMAN Disintegrin and metalloproteinase domain-containing protein 15  
ADA15\_HUMAN Disintegrin and metalloproteinase domain-containing protein 15  
TPBG\_HUMAN Trophoblast glycoprotein  
CD166\_HUMAN CD166 antigen  
CD166\_HUMAN Isoform 2 of CD166 antigen  
SPTN1\_HUMAN Spectrin alpha chain, non-erythrocytic 1  
DAG1\_HUMAN Dystroglycan  
DAG1\_HUMAN Dystroglycan  
DSG2\_HUMAN Desmoglein-2  
DSG2\_HUMAN Desmoglein-2

DSG2\_HUMAN Desmoglein-2  
S29A2\_HUMAN Equilibrative nucleoside transporter 2  
GPNMB\_HUMAN Transmembrane glycoprotein NMB  
S39AE\_HUMAN Zinc transporter ZIP14  
PVRL1\_HUMAN Poliovirus receptor-related protein 1  
PVRL1\_HUMAN Poliovirus receptor-related protein 1  
PVRL1\_HUMAN Poliovirus receptor-related protein 1  
PTPRK\_HUMAN Receptor-type tyrosine-protein phosphatase kappa  
ERBB4\_HUMAN Receptor tyrosine-protein kinase erbB-4  
ERBB4\_HUMAN Receptor tyrosine-protein kinase erbB-4  
AAAT\_HUMAN Neutral amino acid transporter B(0)  
EFNB3\_HUMAN Ephrin-B3  
VAS1\_HUMAN V-type proton ATPase subunit S1  
SYPL1\_HUMAN Synaptophysin-like protein 1  
MICA\_HUMAN MHC class I polypeptide-related sequence A  
CC50B\_HUMAN Cell cycle control protein 50B  
CC50B\_HUMAN Cell cycle control protein 50B  
CC50B\_HUMAN Cell cycle control protein 50B  
F174B\_HUMAN Membrane protein FAM174B  
ANO6\_HUMAN Anoctamin-6  
ANO6\_HUMAN Anoctamin-6  
NADL2\_HUMAN Inactive N-acetylated-alpha-linked acidic dipeptidase-like protein 2  
NADL2\_HUMAN Inactive N-acetylated-alpha-linked acidic dipeptidase-like protein 2  
SDK2\_HUMAN Protein sidekick-2  
SDK2\_HUMAN Protein sidekick-2  
MKS3\_HUMAN Meckelin  
ENTP8\_HUMAN Ectonucleoside triphosphate diphosphohydrolase 8  
CAHD1\_HUMAN VWFA and cache domain-containing protein 1  
GP107\_HUMAN Protein GPR107  
CD276\_HUMAN CD276 antigen  
CD276\_HUMAN CD276 antigen  
CD276\_HUMAN CD276 antigen  
CD276\_HUMAN CD276 antigen  
STEAP3\_HUMAN Metalloreductase STEAP3  
VASN\_HUMAN Vasorin  
RET1G\_HUMAN Retinoic acid early transcript 1G protein  
CNNM4\_HUMAN Metal transporter CNNM4  
CNNM4\_HUMAN Metal transporter CNNM4

EMB\_HUMAN Embigin  
EMB\_HUMAN Embigin  
EMB\_HUMAN Embigin  
EMB\_HUMAN Embigin  
EMB\_HUMAN Embigin  
SE6L2\_HUMAN Seizure 6-like protein 2  
K1324\_HUMAN UPF0577 protein KIAA1324  
K1324\_HUMAN UPF0577 protein KIAA1324  
K1324\_HUMAN UPF0577 protein KIAA1324  
NPNT\_HUMAN Nephronectin  
CD109\_HUMAN CD109 antigen  
CD109\_HUMAN CD109 antigen  
THSD4\_HUMAN Thrombospondin type-1 domain-containing protein 4  
TMM26\_HUMAN Transmembrane protein 26  
BT2A1\_HUMAN Butyrophilin subfamily 2 member A1  
BT2A1\_HUMAN Butyrophilin subfamily 2 member A1  
SDK1\_HUMAN Protein sidekick-1  
SDK1\_HUMAN Protein sidekick-1  
GP126\_HUMAN G-protein coupled receptor 126  
GP126\_HUMAN G-protein coupled receptor 126  
TSN33\_HUMAN Tetraspanin-33  
CTL2\_HUMAN Choline transporter-like protein 2  
CTL2\_HUMAN Choline transporter-like protein 2  
CTL2\_HUMAN Choline transporter-like protein 2  
LRC8A\_HUMAN Leucine-rich repeat-containing protein 8A  
SULF2\_HUMAN Extracellular sulfatase Sulf-2  
SULF2\_HUMAN Extracellular sulfatase Sulf-2  
VSI10\_HUMAN V-set and immunoglobulin domain-containing protein 10  
PROM2\_HUMAN Prominin-2  
IGSF1\_HUMAN Immunoglobulin superfamily member 1  
DCBD1\_HUMAN Discoidin, CUB and LCCL domain-containing protein 1  
I17RC\_HUMAN Interleukin-17 receptor C  
TM87A\_HUMAN Transmembrane protein 87A  
TM87A\_HUMAN Transmembrane protein 87A  
RN149\_HUMAN E3 ubiquitin-protein ligase RNF149  
CNNM3\_HUMAN Metal transporter CNNM3  
CADM4\_HUMAN Cell adhesion molecule 4  
CADM4\_HUMAN Cell adhesion molecule 4  
CADM4\_HUMAN Cell adhesion molecule 4  
PCD19\_HUMAN Protocadherin-19  
TIP\_HUMAN T-cell immunomodulatory protein

TIP\_HUMAN T-cell immunomodulatory protein  
STT3B\_HUMAN Dolichyl-diphosphooligosaccharide--protein glycosyltransferase subunit STT3E  
SPP2A\_HUMAN Signal peptide peptidase-like 2A  
SPP2A\_HUMAN Signal peptide peptidase-like 2A  
SCRB1\_HUMAN Scavenger receptor class B member 1  
SCRB1\_HUMAN Scavenger receptor class B member 1  
CTL1\_HUMAN Choline transporter-like protein 1  
LIPH\_HUMAN Lipase member H  
MUC16\_HUMAN Mucin-16  
PIEZ1\_HUMAN Piezo-type mechanosensitive ion channel component 1  
PIEZ1\_HUMAN Piezo-type mechanosensitive ion channel component 1  
NICA\_HUMAN Nicastrin  
NICA\_HUMAN Nicastrin  
NICA\_HUMAN Nicastrin  
NRCAM\_HUMAN Neuronal cell adhesion molecule  
NRCAM\_HUMAN Neuronal cell adhesion molecule  
NRCAM\_HUMAN Neuronal cell adhesion molecule  
SEM4D\_HUMAN Semaphorin-4D  
CA159\_HUMAN Uncharacterized protein C1orf159  
CA159\_HUMAN Uncharacterized protein C1orf159  
CA159\_HUMAN Uncharacterized protein C1orf159  
TM87B\_HUMAN Transmembrane protein 87B  
PCFT\_HUMAN Proton-coupled folate transporter  
PVRL4\_HUMAN Poliovirus receptor-related protein 4  
MYCT\_HUMAN Proton myo-inositol cotransporter  
PANX1\_HUMAN Pannexin-1  
SORT\_HUMAN Sortilin  
P2RX4\_HUMAN P2X purinoceptor 4  
TM2D3\_HUMAN TM2 domain-containing protein 3  
LRFN3\_HUMAN Leucine-rich repeat and fibronectin type-III domain-containing protein 3  
HCAR1\_HUMAN Hydroxycarboxylic acid receptor 1  
CADM1\_HUMAN Cell adhesion molecule 1  
ABCA2\_HUMAN ATP-binding cassette sub-family A member 2  
ABCA2\_HUMAN ATP-binding cassette sub-family A member 2  
SEM4C\_HUMAN Semaphorin-4C  
SEM4C\_HUMAN Semaphorin-4C  
SEM4C\_HUMAN Semaphorin-4C  
MAGT1\_HUMAN Magnesium transporter protein 1  
ITFG3\_HUMAN Protein ITFG3  
ITFG3\_HUMAN Protein ITFG3  
ITFG3\_HUMAN Protein ITFG3

ITFG3\_HUMAN Protein ITFG3  
S12A5\_HUMAN Solute carrier family 12 member 5  
ANTR1\_HUMAN Anthrax toxin receptor 1  
CNNM2\_HUMAN Metal transporter CNNM2  
PCDH9\_HUMAN Protocadherin-9  
NCKX3\_HUMAN Sodium/potassium/calcium exchanger 3  
TMM8A\_HUMAN Transmembrane protein 8A  
CELR2\_HUMAN Cadherin EGF LAG seven-pass G-type receptor 2  
APMAP\_HUMAN Adipocyte plasma membrane-associated protein  
IL1AP\_HUMAN Interleukin-1 receptor accessory protein  
IL1AP\_HUMAN Interleukin-1 receptor accessory protein  
IL1AP\_HUMAN Interleukin-1 receptor accessory protein  
SEM4B\_HUMAN Semaphorin-4B  
CC50A\_HUMAN Cell cycle control protein 50A  
CC50A\_HUMAN Cell cycle control protein 50A  
CELR1\_HUMAN Cadherin EGF LAG seven-pass G-type receptor 1  
FLRT3\_HUMAN Leucine-rich repeat transmembrane protein FLRT3  
JKAMP\_HUMAN JNK1/MAPK8-associated membrane protein  
ADA22\_HUMAN Disintegrin and metalloproteinase domain-containing protein 22  
FPRP\_HUMAN Prostaglandin F2 receptor negative regulator  
SUSD2\_HUMAN Sushi domain-containing protein 2  
SUSD2\_HUMAN Sushi domain-containing protein 2  
PCYOX\_HUMAN Prenylcysteine oxidase 1

TMEM2\_HUMAN Transmembrane protein 2  
TMEM2\_HUMAN Transmembrane protein 2  
TMEM2\_HUMAN Transmembrane protein 2  
S12A6\_HUMAN Solute carrier family 12 member 6  
SO3A1\_HUMAN Solute carrier organic anion transporter family member 3A1  
PLXA1\_HUMAN Plexin-A1  
S39AA\_HUMAN Zinc transporter ZIP10  
NOTC3\_HUMAN Neurogenic locus notch homolog protein 3  
S6A14\_HUMAN Sodium- and chloride-dependent neutral and basic amino acid transporter B(0+)  
S6A14\_HUMAN Sodium- and chloride-dependent neutral and basic amino acid transporter B(0+)  
S6A14\_HUMAN Sodium- and chloride-dependent neutral and basic amino acid transporter B(0+)  
FZD1\_HUMAN Frizzled-1  
PLXD1\_HUMAN Plexin-D1  
PLXD1\_HUMAN Plexin-D1  
PLXD1\_HUMAN Plexin-D1  
HYOU1\_HUMAN Hypoxia up-regulated protein 1  
HYOU1\_HUMAN Hypoxia up-regulated protein 1  
HYOU1\_HUMAN Hypoxia up-regulated protein 1  
ENTP2\_HUMAN Ectonucleoside triphosphate diphosphohydrolase 2  
ENTP2\_HUMAN Ectonucleoside triphosphate diphosphohydrolase 2  
ST14\_HUMAN Suppressor of tumorigenicity 14 protein  
NPTN\_HUMAN Neuroplastin  
NPTN\_HUMAN Neuroplastin  
NPTN\_HUMAN Neuroplastin  
NPTN\_HUMAN Neuroplastin  
GPR56\_HUMAN G-protein coupled receptor 56  
S4A7\_HUMAN Sodium bicarbonate cotransporter 3  
S4A7\_HUMAN Sodium bicarbonate cotransporter 3

























**Table S3 - The Half-Lives of 311 Unique Glycosylati**

| Uniprot ID | Gene Symbol | Site | ModScore | ModScore Peptide        |
|------------|-------------|------|----------|-------------------------|
| A1A5B4     | ANO9        | 641  | 1000     | K.EGN#STVDCLK.G         |
| F2Z333     | C1orf233    | 109  | 1000     | R.AFALN#CSWR.G          |
| O14672     | ADAM10      | 439  | 1000     | R.N#ISQVLEK.K           |
| O14786     | NRP1        | 150  | 1000     | K.RGPECSQN#YTTPSGVIK.S  |
| O14786     | NRP1        | 522  | 24.44    | K.IGYSNN#GSDWK.M        |
| O15031     | PLXNB2      | 127  | 1000     | R.ALSN#ISLR.L           |
| O15031     | PLXNB2      | 528  | 1000     | K.SCVAVTSAQPQN#MSR.R    |
| O15031     | PLXNB2      | 733  | 1000     | K.LSHDAN#ETLPLHLYVK.S   |
| O15031     | PLXNB2      | 844  | 1000     | R.N#CSFQPER.Y           |
| O15031     | PLXNB2      | 1049 | 1000     | R.EAESLQPM*TVVGTDYVFF   |
| O15230     | LAMA5       | 2196 | 1000     | R.GIN#ASSMAWAR.L        |
| O15230     | LAMA5       | 3107 | 1000     | K.RLN#TTGVSAGCTADLLVC   |
| O15393     | TMPRSS2     | 213  | 22.49    | K.LN#TSAGNVDIYKK.L      |
| O15394     | NCAM2       | 219  | 1000     | K.SFN#ATAERGEEMTFSCR.A  |
| O15394     | NCAM2       | 562  | 18.81    | R.SHGVQTM*VVLNLEPN#I    |
| O43157     | PLXNB1      | 1253 | 1000     | K.YTLDPN#ITSAGPTK.S     |
| O43194     | GPR39       | 192  | 1000     | R.GLTCN#R.S             |
| O60487     | MPZL2       | 39   | 1000     | R.VLEAVN#GTDAR.L        |
| O60603     | TLR2        | 414  | 73.31    | K.N#LTNIDISK.N          |
| O60637     | TSPAN3      | 127  | 37.54    | K.TYN#GTNPDAASR.A       |
| O60896     | RAMP3       | 103  | 1000     | R.QFFSN#CTVDR.V         |
| O75054     | IGSF3       | 101  | 1000     | R.VQGN#STLLHITDLQAR.D   |
| O75054     | IGSF3       | 655  | 24.44    | K.NYN#NTWTR.L           |
| O75054     | IGSF3       | 700  | 52.73    | K.RTLTLVENKPIQLN#CSVK.! |
| O75054     | IGSF3       | 825  | 1000     | R.LSQAQGN#LSVLETR.Q     |
| O75054     | IGSF3       | 842  | 1000     | R.QVQLECVVLN#R.T        |
| O75144     | ICOSLG      | 70   | 22.49    | K.TVVITYHIPQN#SSLENVDSF |
| O75144     | ICOSLG      | 102  | 1000     | R.LFN#VTPQDEQK.F        |
| O75882     | ATRN        | 1073 | 1000     | K.CIN#QSICEK.C          |
| O75882     | ATRN        | 1082 | 1000     | K.CEN#LTTGK.H           |
| O76082     | SLC22A5     | 57   | 1000     | R.CRVPDAAN#LSSAWR.N     |
| O76082     | SLC22A5     | 91   | 1000     | R.LATIAN#FSALGLEPGR.D   |
| O94805     | ACTL6B      | 159  | 1000     | K.TAVLTAFAN#GR.S        |
| O95084     | PRSS23      | 207  | 1000     | R.GAN#DSTSAMPEQMK.F     |
| O95136     | S1PR2       | 19   | 1000     | K.VQEHYN#YTK.E          |
| O95274     | LYPD3       | 163  | 1000     | R.EACQGTSPVVCYN#ASD     |
| O95274     | LYPD3       | 227  | 39.66    | R.CNSDLRN#K.T           |
| O95297     | MPZL1       | 50   | 1000     | K.EIFVAN#GTQGK.L        |
| O95858     | TSPAN15     | 189  | 71.75    | R.N#TTEVVNTMCGYK.T      |
| P01892     | HLA-A       | 110  | 1000     | R.GYYN#QSEAGSHTVQR.M    |

|        |         |      |        |                         |
|--------|---------|------|--------|-------------------------|
| P02786 | TFRC    | 727  | 84.61  | R.KQNNGAFN#ETLFR.N      |
| P04156 | PRNP    | 197  | 1000   | K.QHTVTTTTTKGEN#FTETDV  |
| P04406 | GAPDH   | 9    | 1000   | K.VGVN#GFGR.I           |
| P04406 | GAPDH   | 225  | 1000   | K.VIPELN#GK.L           |
| P04626 | ERBB2   | 530  | 1000   | R.GHCWGPPTQCVN#CSQFI    |
| P05026 | ATP1B1  | 158  | 71.95  | R.FKLEWLGN#CSGLNDETYC   |
| P05026 | ATP1B1  | 193  | 1000   | R.VLGFKPKPPKN#ESLETYPV  |
| P05362 | ICAM1   | 145  | 1000   | R.AN#LTVVLLR.G          |
| P05556 | ITGB1   | 212  | 67.17  | K.LRNPCTSEQN#CTSPFSYK.I |
| P05556 | ITGB1   | 406  | 73.31  | K.NGVN#GTGENGR.K        |
| P05556 | ITGB1   | 481  | 1000   | K.CHEGN#GTFECGACR.C     |
| P05556 | ITGB1   | 520  | 107.32 | R.KEN#SSEICSNNGECVCGQC  |
| P05556 | ITGB1   | 669  | 1000   | K.KDTCTQECSYFN#ITKVESF  |
| P06213 | INSR    | 920  | 1000   | R.GLSPGN#YSVR.I         |
| P06731 | CEACAM5 | 152  | 13.38  | R.VYPELPKPSISSN#NSKPVEI |
| P06731 | CEACAM5 | 204  | 1000   | R.TLTLFN#VTR.N          |
| P06731 | CEACAM5 | 375  | 17.01  | R.LQLSNDN#R.T           |
| P06731 | CEACAM5 | 508  | 27.06  | K.TITVSAELPKPSISSN#NSKP |
| P06756 | ITGAV   | 74   | 1000   | K.AN#TTQPGIVEGGQVLK.C   |
| P06756 | ITGAV   | 554  | 1000   | K.N#MTISR.G             |
| P06756 | ITGAV   | 704  | 1000   | R.LSCAFKTEN#QTR.Q       |
| P07339 | CTSD    | 263  | 1000   | K.GSLSYLN#VTRK.A        |
| P07602 | PSAP    | 101  | 1000   | K.TCDWLPKPN#MSASCK.E    |
| P08069 | IGF1R   | 747  | 1000   | R.DVM*QVAN#TTMSSR.S     |
| P08069 | IGF1R   | 900  | 53.53  | R.LNPGN#YTAR.I          |
| P08069 | IGF1R   | 913  | 1000   | R.IQATSLSGN#GSWTDPVFFY  |
| P08174 | CD55    | 95   | 1000   | K.GSQWSDIEEFCN#R.S      |
| P08195 | SLC3A2  | 365  | 1000   | K.DASSFLAEWQN#ITK.G     |
| P08195 | SLC3A2  | 381  | 106.40 | K.GFSEDRLIAGTN#SSDLQC   |
| P08195 | SLC3A2  | 424  | 44.28  | K.SLVTQYLN#ATGNR.W      |
| P08473 | MME     | 145  | 1000   | R.SCIN#ESAIDSR.G        |
| P08648 | ITGA5   | 593  | 1000   | K.IYLRN#ESEFRDK.L       |
| P08648 | ITGA5   | 773  | 24.44  | K.NLN#NSQSDVVSFR.L      |
| P08648 | ITGA5   | 868  | 27.12  | R.VTGLN#CTTNHPINPK.G    |
| P09758 | TACSTD2 | 120  | 61.56  | K.ARQCN#QTSVCWCVNSVG    |
| P09758 | TACSTD2 | 168  | 1000   | R.HRPTAGAFN#HSDLDAELR   |
| P09758 | TACSTD2 | 208  | 1000   | K.FVAAVHYEQPTIQIELRQN#  |
| P10586 | PTPRF   | 966  | 64.40  | R.DINSQQELQN#ITTDTR.F   |
| P10909 | CLU     | 86   | 1000   | K.KKEDALN#ETRESETK.L    |
| P10909 | CLU     | 291  | 1000   | R.EIRHN#STGCLR.M        |
| P11047 | LAMC1   | 1107 | 24.44  | R.VN#NTLSSQISR.L        |
| P11047 | LAMC1   | 1380 | 44.28  | R.RVNDN#K.T             |
| P11047 | LAMC1   | 1439 | 1000   | K.N#ATSTK.A             |

|        |        |      |        |                         |
|--------|--------|------|--------|-------------------------|
| P11166 | SLC2A1 | 45   | 1000   | K.VIEEFYN#QTVVHR.Y      |
| P11279 | LAMP1  | 84   | 1000   | R.SSCGKEN#TSDPSLVIAFGR  |
| P11279 | LAMP1  | 103  | 1000   | R.GHTLTLN#FTR.N         |
| P11279 | LAMP1  | 249  | 1000   | R.KDN#TTVTR.L           |
| P11362 | FGFR1  | 317  | 1000   | K.TAGVN#TTDK.E          |
| P11717 | IGF2R  | 2085 | 1000   | K.GYPCGGN#K.T           |
| P12821 | ACE    | 146  | 84.36  | K.RQQYNALLSN#MSR.I      |
| P12821 | ACE    | 695  | 39.66  | K.NMQIAN#HTLK.Y         |
| P13473 | LAMP2  | 58   | 1000   | R.YETTN#K.T             |
| P13473 | LAMP2  | 275  | 1000   | R.LN#SSTIK.Y            |
| P13473 | LAMP2  | 356  | 1000   | R.VQPFN#VTQGK.Y         |
| P15151 | PVR    | 105  | 1000   | R.LGAELRN#ASLR.M        |
| P15260 | IFNGR1 | 179  | 1000   | R.MN#GSEIQYK.I          |
| P16070 | CD44   | 57   | 1000   | K.AFN#STLPTM*AQMEK.A    |
| P16144 | ITGB4  | 695  | 1000   | R.CSFRDEDDCTYSYTMEGI    |
| P16422 | EPCAM  | 74   | 1000   | K.AEMN#GSK.L            |
| P16422 | EPCAM  | 111  | 53.71  | K.QCN#GTSMCWCVNTAGVR    |
| P17181 | IFNAR1 | 81   | 1000   | K.LSGCQN#ITSTK.C        |
| P17181 | IFNAR1 | 172  | 1000   | K.N#SSGVEER.I           |
| P17301 | ITGA2  | 105  | 65.26  | K.LNLQTSTSIPIV#VTEM*K.T |
| P17301 | ITGA2  | 343  | 1000   | R.YFFN#VSDEAALLEK.A     |
| P17301 | ITGA2  | 1057 | 1000   | R.TASCSN#VTCWLK.D       |
| P18564 | ITGB6  | 463  | 1000   | K.EVEVN#SSK.C           |
| P19256 | CD58   | 169  | 1000   | R.N#STSIYFK.M           |
| P20645 | M6PR   | 57   | 1000   | K.RLKPLFN#K.S           |
| P20645 | M6PR   | 83   | 106.40 | R.EAGN#HTSGAGLVQINK.S   |
| P21589 | NT5E   | 53   | 1000   | K.CVN#ASR.C             |
| P21589 | NT5E   | 333  | 1000   | K.LDN#YSTQELGK.T        |
| P21860 | ERBB3  | 437  | 48.87  | K.NLN#VTSLGFR.S         |
| P21860 | ERBB3  | 522  | 1000   | K.VCDPLCSSGGCWGPGPGQ    |
| P22223 | CDH3   | 566  | 1000   | R.QVLN#ITDK.D           |
| P22413 | ENPP1  | 285  | 1000   | K.MN#ASFSLK.S           |
| P22413 | ENPP1  | 341  | 1000   | K.MYN#GSVPFEER.I        |
| P22413 | ENPP1  | 477  | 16.27  | R.N#LSCREPNQHFKPYLK.H   |
| P23229 | ITGA6  | 966  | 47.05  | R.KYQTLN#CSVNVCVNIR.C   |
| P25445 | FAS    | 136  | 36.70  | R.CKPNFFCN#STVCEHCDPC   |
| P26006 | ITGA3  | 265  | 1000   | K.N#ITIVTGAPR.H         |
| P26006 | ITGA3  | 511  | 1000   | R.RN#ITLAYTLEADRDR.R    |
| P26006 | ITGA3  | 969  | 37.54  | R.TSIPTINMEN#K.T        |
| P26012 | ITGB8  | 466  | 42.19  | R.N#CSCQCEDNRGPK.G      |
| P27701 | CD82   | 198  | 1000   | K.GFCEAPGN#R.T          |
| P29323 | EPHB2  | 482  | 1000   | K.ELSEYN#ATAIK.S        |
| P30464 | HLA-B  | 110  | 1000   | R.GYYN#QSEAGSHTLQR.M    |

|        |          |      |        |                        |
|--------|----------|------|--------|------------------------|
| P30825 | SLC7A1   | 226  | 84.36  | K.NWQLTEEDFGN#TSGR.L   |
| P30825 | SLC7A1   | 235  | 24.44  | R.LCLNN#DTK.E          |
| P30988 | CALCR    | 91   | 1000   | R.M*QQLPAYQEGEPYCN#R.' |
| P32004 | L1CAM    | 294  | 20.17  | R.VTYQNH#K.T           |
| P32004 | L1CAM    | 671  | 1000   | K.VPGN#QTSTTLK.L       |
| P32004 | L1CAM    | 849  | 1000   | R.GYN#VTYWR.E          |
| P35052 | GPC1     | 116  | 1000   | R.SFDDHFQHLLN#DSER.T   |
| P35613 | BSG      | 268  | 1000   | K.ALM*N#GSESR.F        |
| P35613 | BSG      | 302  | 1000   | R.CN#GTSSK.G           |
| P36941 | LTBR     | 177  | 1000   | K.AGHFQN#TSSPSAR.C     |
| P40189 | IL6ST    | 83   | 1000   | K.EQYTIIN#R.T          |
| P40189 | IL6ST    | 131  | 104.48 | K.N#LSCIVNEGK.K        |
| P42892 | ECE1     | 166  | 1000   | K.HLLEN#STASVSEAERK.A  |
| P42892 | ECE1     | 187  | 1000   | R.ACM*N#ETRIEELR.A     |
| P42892 | ECE1     | 249  | 17.01  | K.NSN#SNVIQVDQSGGLPSI  |
| P42892 | ECE1     | 539  | 1000   | R.FFN#FSWR.V           |
| P48960 | CD97     | 108  | 38.37  | K.TFKN#ESENTCQDVDECQC  |
| P48960 | CD97     | 371  | 1000   | R.GDKN#VTMGQSSAR.M     |
| P50454 | SERPINH1 | 120  | 1000   | R.SLSN#STAR.N          |
| P50895 | BCAM     | 439  | 1000   | R.TQN#FTLLVQGSPELK.T   |
| P51795 | CLCN5    | 408  | 23.62  | K.LCDYENRFN#TSK.G      |
| P51805 | PLXNA3   | 59   | 1000   | K.LAPN#LTELR.A         |
| P52569 | SLC7A2   | 227  | 1000   | K.N#ISASAR.E           |
| P52797 | EFNA3    | 100  | 1000   | R.TCN#ASQGFKR.W        |
| P53801 | PTTG1IP  | 54   | 78.16  | K.N#VSCLWCNTNK.A       |
| P54709 | ATP1B3   | 124  | 1000   | K.FLKPYTLEEQKN#LTVCPDC |
| P55268 | LAMB2    | 1249 | 1000   | R.N#TSAASTAQLVEATEELRI |
| P56159 | GFRA1    | 59   | 1000   | R.QCVAGKETN#FSLASGLEA  |
| P56159 | GFRA1    | 152  | 24.44  | K.GN#NCLDAAK.A         |
| P56159 | GFRA1    | 406  | 20.99  | K.SN#VSGNTHLCISNGNYEK. |
| P78536 | ADAM17   | 103  | 1000   | K.VVVVDGKN#ESEYTVK.W   |
| P78536 | ADAM17   | 452  | 1000   | K.MFSN#CSK.Q           |
| P78536 | ADAM17   | 539  | 1000   | K.KCQEAIN#ATCK.G       |
| P98160 | HSPG2    | 89   | 1000   | R.ALVN#FTR.S           |
| Q02487 | DSC2     | 392  | 1000   | R.AN#YTILK.G           |
| Q03405 | PLAUR    | 194  | 1000   | K.CCN#TTK.C            |
| Q04721 | NOTCH2   | 46   | 32.22  | R.DGYEPCVNEGMCVTYHN#   |
| Q07954 | LRP1     | 357  | 1000   | R.CDMDGQN#R.T          |
| Q07954 | LRP1     | 2521 | 1000   | R.AVN#SSCR.A           |
| Q07954 | LRP1     | 3333 | 1000   | R.TCVSN#CTASQFVCK.N    |
| Q07954 | LRP1     | 4364 | 1000   | K.QSGDVTCN#CTDGR.V     |
| Q08334 | IL10RB   | 161  | 1000   | K.N#GTDEK.F            |
| Q08722 | CD47     | 73   | 1000   | K.GRDIYTFDGALN#K.S     |

|          |          |      |        |                         |
|----------|----------|------|--------|-------------------------|
| Q13308   | PTK7     | 116  | 97.75  | R.SAN#ASFNIK.W          |
| Q13332   | PTPRS    | 733  | 1000   | R.KVEAEALN#ATAIR.V      |
| Q13433   | SLC39A6  | 67   | 17.01  | R.YGEN#NSLSVEGFRK.L     |
| Q13433   | SLC39A6  | 241  | 1000   | K.TN#ESVSEPR.K          |
| Q13444   | ADAM15   | 237  | 1000   | K.YRDFQHLLN#R.T         |
| Q13641   | TPBG     | 81   | 1000   | R.N#LTEVPTDLPAYVR.N     |
| Q13641   | TPBG     | 256  | 121.36 | R.N#LTHLESLHLEDNALK.V   |
| Q13641   | TPBG     | 275  | 1000   | K.VLHN#GTLAELQGLPHIR.V  |
| Q13740   | ALCAM    | 95   | 76.73  | R.LNLSEN#YTLSISNAR.I    |
| Q13740   | ALCAM    | 167  | 1000   | K.KLGDCISEDSPDGN#ITW!   |
| Q13740   | ALCAM    | 265  | 1000   | K.EGDN#ITLK.C           |
| Q13740   | ALCAM    | 306  | 1000   | R.RN#ATGDYK.C           |
| Q13740   | ALCAM    | 480  | 109.94 | K.IIISPEEN#VTLTCTAENQLE |
| Q13740-2 | ALCAM    | 499  | 76.73  | R.TVNSLN#VSANENR.E      |
| Q14126   | DSG2     | 182  | 71.07  | K.IN#ATDADEPNTLNSK.I    |
| Q14126   | DSG2     | 462  | 1000   | R.YVQN#GTYTVK.I         |
| Q14542   | SLC29A2  | 48   | 1000   | R.LAGAGN#STAR.I         |
| Q14956   | GPNMB    | 249  | 35.78  | K.NDRN#SSDETFLK.D       |
| Q15043   | SLC39A14 | 77   | 1000   | R.GN#VTQHVGHR.N         |
| Q15223   | PVRL1    | 72   | 1000   | K.STN#GSK.Q             |
| Q15223   | PVRL1    | 202  | 17.01  | R.NPN#GTVTVISR.Y        |
| Q15223   | PVRL1    | 297  | 1000   | K.GVEAQN#R.T            |
| Q15262   | PTPRK    | 462  | 65.25  | K.APQHVVNHLPPYTN#VSLK   |
| Q15303   | ERBB4    | 358  | 1000   | K.FIN#CTK.I             |
| Q15303   | ERBB4    | 576  | 1000   | K.MEDGLLTCHGPGPDN#CTK   |
| Q15758   | SLC1A5   | 212  | 1000   | R.SYSTTYEERN#ITGTR.V    |
| Q15768   | EFNB3    | 210  | 18.81  | K.ENLPGDPTS#ATSR.G      |
| Q15904   | ATP6AP1  | 261  | 1000   | K.QPVSPVIHPPVSYN#DTAPR  |
| Q29980   | MICB     | 234  | 1000   | R.N#ITLTLWR.Q           |
| Q29983   | MICA     | 79   | 1000   | R.AKPQGGQWAEDVLGN#KTW   |
| Q29983   | MICA     | 125  | 1000   | R.VCEIHEDN#STR.S        |
| Q29983   | MICA     | 210  | 1000   | R.TVPPMVN#VTR.S         |
| Q29983   | MICA     | 220  | 1000   | R.SEASEGN#ITVTCR.A      |
| Q3MIR4   | TMEM30B  | 273  | 1000   | R.IRQGN#YSAGLPR.G       |
| Q3MIR4   | TMEM30B  | 286  | 36.56  | R.GAYRVN#ITYNYPVR.A     |
| Q4KMQ2   | ANO6     | 493  | 30.84  | K.NIN#GTDPIQK.Y         |
| Q4KMQ2   | ANO6     | 802  | 29.67  | K.GNPYSDLGN#HTTCR.Y     |
| Q58DX5   | NAALADL2 | 295  | 37.54  | K.N#VTNQIALLK.L         |
| Q58DX5   | NAALADL2 | 556  | 48.87  | K.NNFN#CTR.R            |
| Q58EX2   | SDK2     | 577  | 1000   | R.VISAGGN#DSR.S         |
| Q5HYA8   | TMEM67   | 179  | 1000   | R.CEPTFVN#TSR.S         |
| Q5MY95   | ENTPD8   | 135  | 1000   | R.KN#SSQAR.D            |
| Q5SZK8   | FREM2    | 2121 | 1000   | K.ATVSIN#DSVSDLPK.M     |

|        |          |       |        |                         |
|--------|----------|-------|--------|-------------------------|
| Q5VU97 | CACHD1   | 329   | 24.44  | R.STNN#NTK.F            |
| Q5ZPR3 | CD276    | 91    | 1000   | K.QLVHSFAEGQDQGSAYAN    |
| Q5ZPR3 | CD276    | 104   | 1000   | R.TALFPDLLAQGN#ASLR.L   |
| Q5ZPR3 | CD276    | 215   | 1000   | R.VVLGAN#GTYSCLVR.N     |
| Q658P3 | STEAP3   | 344   | 1000   | K.QVLAN#K.S             |
| Q6EMK4 | VASN     | 117   | 1000   | R.LHEITN#ETFR.G         |
| Q6H3X3 | RAET1G   | 82    | 1000   | K.KLN#VTTAWK.A          |
| Q6P4Q7 | CNNM4    | 85    | 33.66  | R.LYGYSLGN#ISSNLISFTEVI |
| Q6P4Q7 | CNNM4    | 127   | 1000   | R.GN#TSGVLVVLTK.F       |
| Q6UXD5 | SEZ6L2   | 641   | 1000   | K.EVPRN#DTCPELPPPEWGW   |
| Q6UXI9 | NPNT     | 273   | 1000   | K.GN#GTILK.G            |
| Q6YHK3 | CD109    | 118   | 1000   | R.TQDEILFSN#STR.L       |
| Q6YHK3 | CD109    | 419   | 1000   | K.IN#YTVPQSGTFK.I       |
| Q6ZMP0 | THSD4    | 709   | 1000   | R.QVYAN#R.S             |
| Q6ZUK4 | TMEM26   | 110   | 52.40  | R.KEDFN#QTLTSNEQTSR.A   |
| Q7Z5N4 | SDK1     | 1767  | 1000   | K.N#LTSHTK.Y            |
| Q86SQ4 | GPR126   | 143   | 1000   | K.GFN#ASYIR.V           |
| Q86SQ4 | GPR126   | 505   | 24.44  | K.NN#ESLDEGLR.L         |
| Q86WC4 | OSTM1    | 135   | 1000   | R.AAGN#TSESQSCAR.S      |
| Q8IWA5 | SLC44A2  | 417   | 132.11 | K.TCNPETFPSSN#ESR.Q     |
| Q8IWT6 | LRRC8A   | 66    | 1000   | K.DSCN#DSFR.G           |
| Q8IWU5 | SULF2    | 171   | 1000   | R.FYN#YTLCR.N           |
| Q8N0Z9 | VSIG10   | 347   | 1000   | R.N#LTQPEVIIQPSSR.H     |
| Q8N271 | PROM2    | 725   | 1000   | R.N#VSECFLAR.E          |
| Q8N441 | FGFRL1   | 231   | 1000   | R.AGAIN#ATYK.V          |
| Q8N6C5 | IGSF1    | 1223  | 1000   | K.GIGN#YSCSYR.L         |
| Q8N8Z6 | DCBLD1   | 64    | 47.57  | K.NYPGTYPN#HTVCEK.T     |
| Q8NC42 | RNF149   | 131   | 88.82  | R.RN#ASAVVLYNEER.Y      |
| Q8NFZ8 | CADM4    | 67    | 1000   | R.QTLFFN#GTR.A          |
| Q8TAB3 | PCDH19   | 546   | 1000   | K.DGGLPSLQSN#ATVR.V     |
| Q8WWY8 | LIPH     | 357   | 1000   | K.AGN#TTESK.I           |
| Q8WXI7 | MUC16    | 12416 | 1000   | R.KFN#TTER.V            |
| Q92508 | PIEZO1   | 2294  | 1000   | R.ELYN#GTADITLR.F       |
| Q92508 | PIEZO1   | 2331  | 1000   | K.HM*LALAPN#STAR.R      |
| Q92542 | NCSTN    | 387   | 1000   | R.TSLELWM*HTDPVVSQKN#E  |
| Q92542 | NCSTN    | 417   | 1000   | R.RPN#QSQPLPPSSLQR.F    |
| Q92542 | NCSTN    | 612   | 1000   | K.DLYEYSWVQGPLHSN#ETI   |
| Q92823 | NRCAM    | 223   | 1000   | R.FN#HTQTIQK.Q          |
| Q92823 | NRCAM    | 276   | 45.03  | R.ERPPTFLTPEGN#ASNK.E   |
| Q92823 | NRCAM    | 858   | 28.93  | R.VNVVN#STLAEVHWDVPVI   |
| Q92823 | NRCAM    | 1019  | 48.87  | K.NLN#FSTR.Y            |
| Q92854 | SEMA4D   | 379   | 71.75  | R.AAN#YTSSLNLNLPDK.T    |
| Q96HA4 | C1orf159 | 128   | 1000   | R.SFAGPGAPFPMN#R.S      |

|        |          |      |        |                        |
|--------|----------|------|--------|------------------------|
| Q96K49 | TMEM87B  | 68   | 1000   | K.TMFN#STDIK.L         |
| Q96NT5 | SLC46A1  | 58   | 1000   | R.FSADLGYN#GTR.Q       |
| Q96NY8 | PVRL4    | 281  | 1000   | K.CLSEGQPPPSYN#WTR.L   |
| Q96QE2 | SLC2A13  | 433  | 1000   | R.ITFKPIAPSGQN#ATCTR.Y |
| Q96RD7 | PANX1    | 255  | 1000   | K.SGILRN#DSTVPDQFQCK.L |
| Q99523 | SORT1    | 162  | 24.44  | K.DITDLIN#NTFIR.T      |
| Q99571 | P2RX4    | 75   | 1000   | K.GVAVTN#TSK.L         |
| Q9BY67 | CADM1    | 101  | 1000   | R.FQLLN#FSSSELK.V      |
| Q9BY67 | CADM1    | 113  | 1000   | K.VSLTN#VVISDEGR.Y     |
| Q9C0C4 | SEMA4C   | 106  | 24.44  | K.NN#QTECFNFIR.F       |
| Q9C0C4 | SEMA4C   | 121  | 1000   | R.FLQPYN#ASHLYVCGTYAF  |
| Q9C0C4 | SEMA4C   | 522  | 1000   | R.DPYCAWSVN#TSR.C      |
| Q9H0U3 | MAGT1    | 71   | 1000   | K.APPRN#YSVIVMFTALQLHI |
| Q9H0X4 | ITFG3    | 389  | 1000   | R.YKPDTLAVAVEN#GTGTDF  |
| Q9HC56 | PCDH9    | 450  | 1000   | K.IVASDSGKPSLN#QTALVR. |
| Q9HCN3 | TMEM8A   | 535  | 1000   | R.GWSCTDN#STAQTVAQQR.  |
| Q9HCU4 | CELSR2   | 1036 | 20.17  | R.LLDRNDNPPVLGNFEILFN  |
| Q9HCU4 | CELSR2   | 1076 | 115.01 | R.GNELSLVLLN#ASTGELK.L |
| Q9HCU4 | CELSR2   | 1741 | 1000   | R.LHGLHLSN#ITVGGIPGPAG |
| Q9HCU4 | CELSR2   | 1900 | 1000   | K.GFDPDCN#K.T          |
| Q9HCU4 | CELSR2   | 2043 | 1000   | R.N#ESGLDSGR.S         |
| Q9HCU4 | CELSR2   | 2061 | 1000   | R.N#ATQHTAGYFGSDVK.V   |
| Q9HDC9 | APMAP    | 160  | 1000   | R.AGPN#GTLFVADAYK.G    |
| Q9NPH3 | IL1RAP   | 118  | 1000   | R.N#TTYCSK.V           |
| Q9NPR2 | SEMA4B   | 405  | 1000   | R.KIN#SSLQLPDR.V       |
| Q9NYQ6 | CELSR1   | 1576 | 1000   | K.DIGN#YSCAAQGTQTGSKK  |
| Q9NYQ6 | CELSR1   | 2122 | 1000   | K.LSRN#ETQVDGAR.A      |
| Q9P055 | JKAMP    | 37   | 1000   | K.N#GSTEIYGECGVCPR.G   |
| Q9P2B2 | PTGFRN   | 286  | 1000   | K.N#VSVAEGK.E          |
| Q9P2B2 | PTGFRN   | 600  | 1000   | R.YSVLIM*AEKPVGDLSSPN# |
| Q9UGT4 | SUSD2    | 162  | 1000   | K.SELVN#ETR.W          |
| Q9UGT4 | SUSD2    | 494  | 1000   | R.AQPGTMSN#GTETR.G     |
| Q9UHN6 | TMEM2    | 171  | 1000   | K.DGSRN#ITLR.T         |
| Q9UHN6 | TMEM2    | 292  | 1000   | K.ILESERFDTHEYRN#ESR.R |
| Q9UHN6 | TMEM2    | 739  | 1000   | K.TTN#SSAADPR.E        |
| Q9UHN6 | TMEM2    | 1092 | 1000   | R.QN#GSLSK.I           |
| Q9UIG8 | SLCO3A1  | 153  | 1000   | R.WGAERDVCAAN#GSGGE    |
| Q9UIW2 | PLXNA1   | 77   | 1000   | K.LSGN#LTLR.A          |
| Q9UIW2 | PLXNA1   | 1043 | 1000   | K.YN#YTEDPTILR.I       |
| Q9ULF5 | SLC39A10 | 339  | 45.83  | K.DLNEDDHHHECLN#VTQLI  |
| Q9ULI3 | HEG1     | 1080 | 1000   | K.RTFLN#TTVEK.H        |
| Q9UM47 | NOTCH3   | 1179 | 1000   | R.CLHN#GTCVDLVGGFR.C   |
| Q9UN76 | SLC6A14  | 155  | 1000   | K.N#CSSWSDK.N          |

|        |         |     |       |                        |
|--------|---------|-----|-------|------------------------|
| Q9UN76 | SLC6A14 | 174 | 30.61 | R.SPIVTHCN#VSTVNK.G    |
| Q9UN76 | SLC6A14 | 189 | 1000  | K.GIQEIIQM*N#K.S       |
| Q9UP38 | FZD1    | 231 | 1000  | K.FPVHGAGELCVGQN#TSDK  |
| Q9Y4D7 | PLXND1  | 500 | 48.87 | K.INLN#ESMQVVS.R       |
| Q9Y4D7 | PLXND1  | 696 | 1000  | K.AN#FTIYDCSR.T        |
| Q9Y4L1 | HYOU1   | 515 | 1000  | R.VFGSQN#LTTVK.L       |
| Q9Y4L1 | HYOU1   | 869 | 1000  | K.N#ATLAEQAK.L         |
| Q9Y5L3 | ENTPD2  | 129 | 31.28 | R.LLN#LTNPEASTSVLMAVTI |
| Q9Y5Y6 | ST14    | 485 | 1000  | R.CDGWADCTDHSDELN#CSG  |
| Q9Y639 | NPTN    | 197 | 73.31 | K.N#ASNMEYR.I          |
| Q9Y639 | NPTN    | 229 | 1000  | K.AN#ATIEVK.A          |
| Q9Y6M7 | SLC4A7  | 786 | 49.59 | K.DN#ITAHNISWR.N       |
| Q9Y6M7 | SLC4A7  | 796 | 1000  | R.N#LTVSECK.K          |

## on Sites in Expt# 1

| Half-Life (h) | PPM   | XCorr | Domain Name          | Domain Range |
|---------------|-------|-------|----------------------|--------------|
| 14.59         | -5.46 | 1.685 |                      |              |
| 20.43         | -0.48 | 3.091 | Fibronectin type-III | 74-166       |
| 22.42         | -3.2  | 2.697 | Peptidase M12B       | 220-456      |
| 5.21          | 1.14  | 2.784 | CUB 2                | 147-265      |
| 5.11          | 0.76  | 3.196 | F5/8 type C2         | 431-583      |
| 22.50         | -0.63 | 3.021 | Sema                 | 20-466       |
| 104.50        | -1.01 | 1.563 |                      |              |
| 10.70         | -2.08 | 6.774 |                      |              |
| 21.23         | -0.9  | 2.461 | IPT/TIG 1            | 803-893      |
| 11.29         | 2.04  | 4.091 | IPT/TIG 3            | 983-1092     |
| 10.98         | 5.01  | 3.098 |                      |              |
| 24.32         | 2.33  | 3.989 | Laminin G-like 2     | 2941-3115    |
| 11.90         | 4.03  | 1.952 | SRCR                 | 150-242      |
| 115.46        | -0.59 | 5.675 | Ig-like C2-type 3    | 208-297      |
| 82.15         | 4.97  | 5.084 | Fibronectin type-III | 1498-591     |
| 19.91         | 1.88  | 1.98  | IPT/TIG 3            | 1252-1375    |
| 40.55         | -0.81 | 2.149 |                      |              |
| 14.10         | -7.63 | 3.961 | Ig-like V-type       | 27-141       |
| 14.92         | 4.33  | 2.972 |                      |              |
| 10.82         | -0.81 | 2.461 |                      |              |
| 18.74         | -3.86 | 2.179 |                      |              |
| >200          | 1.69  | 4.761 | Ig-like C2-type 1    | 20-138       |
| 109.50        | -0.53 | 2.341 | Ig-like C2-type 5    | 545-661      |
| 23.93         | -1.11 | 6.579 | Ig-like C2-type 6    | 676-803      |
| 12.20         | 0.43  | 4.865 | Ig-like C2-type 7    | 813-945      |
| 12.32         | -0.47 | 3.983 | Ig-like C2-type 7    | 813-945      |
| >200          | 4.39  | 3.87  | Ig-like V-type       | 19-129       |
| 16.47         | 3.41  | 2.412 | Ig-like V-type       | 19-129       |
| 25.28         | -4.56 | 2.684 | Laminin EGF-like 1   | 1063-1108    |
| 55.72         | -2.24 | 2.131 | Laminin EGF-like 1   | 1063-1108    |
| 47.00         | -2.27 | 4.922 |                      |              |
| 32.61         | 2.93  | 4.507 |                      |              |
| >200          | -1.78 | 2.845 |                      |              |
| 19.51         | -1.72 | 2.516 |                      |              |
| 28.67         | -2.51 | 2.909 |                      |              |
| 4.97          | -5.27 | 3.541 | UPAR/Ly6 2           | 140-222      |
| 5.05          | 0.2   | 1.911 |                      |              |
| 5.36          | 3.3   | 3.682 | Ig-like V-type       | 36-146       |
| 16.32         | 0.99  | 3.541 |                      |              |
| 25.61         | -0.33 | 3.782 |                      |              |

|        |       |       |                      |           |
|--------|-------|-------|----------------------|-----------|
| 14.46  | 1.25  | 5.659 |                      |           |
| 13.70  | 6.35  | 2.63  |                      |           |
| >200   | -0.2  | 2.949 |                      |           |
| >200   | 0.87  | 2.563 |                      |           |
| >200   | -2.68 | 5.416 |                      |           |
| 19.58  | -0.12 | 6.447 |                      |           |
| 23.52  | 0.39  | 3.694 |                      |           |
| 17.80  | 0.28  | 3.758 | Ig-like C2-type 2    | 128-193   |
| 20.40  | 0.64  | 5.07  | VWFA                 | 140-378   |
| 16.85  | -0.07 | 4.846 |                      |           |
| 20.83  | -0.44 | 2.258 |                      |           |
| 74.77  | 8.68  | 4.45  |                      |           |
| 134.97 | 4.71  | 4.761 |                      |           |
| 16.05  | 7.37  | 3.279 | Fibronectin type-III | ε853-947  |
| 14.70  | -4.71 | 4.82  | Ig-like 1            | 35-144    |
| 17.94  | 0.34  | 4.171 | Ig-like 2            | 146-237   |
| >200   | -0.55 | 1.819 | Ig-like 4            | 325-415   |
| 18.02  | 7.27  | 7.008 | Ig-like 6            | 502-593   |
| 10.19  | 0.39  | 2.69  |                      |           |
| 15.48  | -0.37 | 2.585 |                      |           |
| 21.09  | -0.67 | 3.857 |                      |           |
| >200   | -7.28 | 3.467 | Peptidase A1         | 79-407    |
| 11.90  | -1.57 | 2.393 | Saposin B-type 1     | 59-142    |
| 9.94   | 4.74  | 2.325 | Fibronectin type-III | ε735-828  |
| 12.97  | -4.85 | 2.671 | Fibronectin type-III | ε834-927  |
| 15.47  | 0.49  | 3.242 | Fibronectin type-III | ε834-927  |
| >200   | -0.26 | 1.526 | Sushi 1              | 35-96     |
| 25.17  | -0.45 | 3.743 |                      |           |
| 22.71  | 0.01  | 6.299 |                      |           |
| 35.24  | -0.99 | 4.423 |                      |           |
| 94.42  | 1.15  | 2.095 |                      |           |
| 20.01  | 1.74  | 3.964 |                      |           |
| 19.70  | 3.55  | 3.183 |                      |           |
| 85.28  | -7.51 | 3.319 |                      |           |
| 16.37  | 1.83  | 3.601 | Thyroglobulin type-1 | 70-145    |
| 11.02  | -5.54 | 1.991 |                      |           |
| 6.23   | -1.34 | 6.515 |                      |           |
| 7.18   | 3.21  | 3.248 | Fibronectin type-III | ε918-1010 |
| 5.57   | -0.98 | 1.687 |                      |           |
| 13.54  | -0.41 | 2.335 |                      |           |
| 4.88   | -4.47 | 3.113 |                      |           |
| 8.01   | -0.1  | 2.963 |                      |           |
| 3.84   | 0.3   | 2.56  |                      |           |

|       |       |       |                      |         |
|-------|-------|-------|----------------------|---------|
| 15.74 | -2.32 | 3.738 |                      |         |
| >200  | 4.24  | 3.122 |                      |         |
| >200  | 6.17  | 4.122 |                      |         |
| 28.19 | -1.95 | 2.566 |                      |         |
| 5.47  | -0.26 | 1.53  | Ig-like C2-type 3    | 255-357 |
| 14.86 | -6.38 | 1.725 |                      |         |
| >200  | -1.96 | 5.973 |                      |         |
| >200  | -7.84 | 2.8   |                      |         |
| >200  | -0.91 | 2.303 |                      |         |
| 22.12 | -0.04 | 2.856 |                      |         |
| >200  | -1.67 | 2.371 |                      |         |
| 58.65 | 2.42  | 2.456 | Ig-like V-type       | 24-139  |
| 3.75  | 4.66  | 2.612 |                      |         |
| 11.29 | 6.9   | 2.535 | Link                 | 32-120  |
| 19.90 | 7.35  | 3.042 |                      |         |
| 22.87 | -0.01 | 2.116 | Thyroglobulin type-1 | 63-135  |
| 9.93  | 1.09  | 2.588 | Thyroglobulin type-1 | 63-135  |
| 3.83  | -0.21 | 2.264 | Fibronectin type-III | 132-126 |
| 17.06 | 0.01  | 2.412 | Fibronectin type-III | 127-227 |
| 27.93 | -2.28 | 2.647 |                      |         |
| 21.11 | -0.29 | 2.934 | VWFA                 | 188-365 |
| 43.93 | -1.54 | 2.497 |                      |         |
| 9.93  | -1.37 | 1.73  |                      |         |
| 21.71 | -0.06 | 4     |                      |         |
| >200  | 4.6   | 3.507 |                      |         |
| 66.23 | -8.67 | 4.574 |                      |         |
| 28.43 | -0.69 | 1.815 |                      |         |
| 23.76 | -0.97 | 3.094 |                      |         |
| 7.08  | -0.92 | 3.99  |                      |         |
| 4.26  | -2.16 | 2.42  |                      |         |
| 2.97  | 1.39  | 3.322 | Cadherin 5           | 547-650 |
| 25.21 | 5.66  | 3.149 |                      |         |
| 47.00 | 3.1   | 3.054 |                      |         |
| 16.88 | 9.54  | 4.137 |                      |         |
| >200  | 3.98  | 2.426 |                      |         |
| 45.16 | 0.7   | 4.539 |                      |         |
| 36.06 | 0.17  | 3.919 |                      |         |
| 81.11 | -1.89 | 4.517 |                      |         |
| 27.53 | -2.3  | 2.883 |                      |         |
| 6.99  | 0.28  | 2.234 |                      |         |
| >200  | -7.98 | 2.143 |                      |         |
| 20.83 | -5.29 | 3.002 | Fibronectin type-III | 435-530 |
| 11.61 | -0.29 | 4.116 |                      |         |

|        |       |       |                        |           |
|--------|-------|-------|------------------------|-----------|
| 22.91  | -0.04 | 2.779 |                        |           |
| 14.43  | 9.7   | 2.979 |                        |           |
| >200   | -6.99 | 1.89  |                        |           |
| 10.46  | -0.2  | 2.176 | Ig-like C2-type 3      | 240-328   |
| 11.29  | 2.8   | 2.333 | Fibronectin type-III 1 | 1615-712  |
| 13.28  | 1.3   | 3.412 | Fibronectin type-III 3 | 814-916   |
| 28.39  | 5.22  | 4.966 |                        |           |
| 13.95  | -0.47 | 1.726 | Ig-like V-type         | 221-315   |
| 17.70  | -7.03 | 2.641 | Ig-like V-type         | 221-315   |
| >200   | -7.83 | 1.642 |                        |           |
| 15.88  | 3.47  | 2.142 | Ig-like C2-type        | 26-120    |
| 7.16   | -3.76 | 2.57  | Fibronectin type-III 1 | 125-216   |
| 16.24  | 8.61  | 5.33  |                        |           |
| 35.79  | 8.35  | 2.74  |                        |           |
| 13.92  | -2.84 | 3.125 |                        |           |
| 11.50  | -1.47 | 3.214 |                        |           |
| 22.32  | -8.25 | 4.643 | EGF-like 2 calcium-l   | 64-115    |
| 10.66  | -0.06 | 3.775 |                        |           |
| 17.10  | -2.18 | 2.598 |                        |           |
| 8.42   | -1.17 | 2.882 | Ig-like C2-type 2      | 363-411   |
| 56.57  | 3.49  | 3.888 |                        |           |
| >200   | 2.96  | 4.017 | Sema                   | 20-488    |
| 6.49   | -7.97 | 2.606 |                        |           |
| 10.41  | -2.16 | 2.606 | Ephrin RBD             | 30-169    |
| 15.51  | 1.51  | 2.687 | PSI                    | 39-92     |
| 110.81 | -3.07 | 5.567 |                        |           |
| 13.13  | 2.14  | 4.868 |                        |           |
| 7.32   | 3.48  | 5.783 |                        |           |
| 6.65   | -1.05 | 2.992 |                        |           |
| 8.40   | -4.67 | 2.832 |                        |           |
| 7.53   | -0.51 | 2.915 |                        |           |
| 30.68  | 8     | 2.096 | Peptidase M12B         | 223-474   |
| >200   | -0.89 | 2.631 | Disintegrin            | 475-563   |
| >200   | -0.52 | 2.28  | SEA                    | 80-191    |
| 15.54  | -1.99 | 2.187 | Cadherin 3             | 356-471   |
| 16.55  | -9.81 | 1.54  | UPAR/Ly6 2             | 115-213   |
| 32.02  | 3.06  | 4.005 | EGF-like 1             | 26-63     |
| 13.27  | -0.56 | 2.946 |                        |           |
| 25.70  | -0.4  | 2.667 |                        |           |
| >200   | -5.02 | 1.829 | LDL-receptor class A   | 3332-3371 |
| 8.71   | -1.03 | 3.335 | EGF-like 21            | 4340-4375 |
| 5.03   | -0.3  | 1.656 | Fibronectin type-III 2 | 114-216   |
| 19.84  | -4.24 | 5.972 | Ig-like V-type         | 19-127    |

|        |       |       |                        |           |
|--------|-------|-------|------------------------|-----------|
| 10.04  | -9.83 | 2.452 | Ig-like C2-type 1      | 31-120    |
| 16.10  | -0.96 | 5.051 | Fibronectin type-III 5 | 723-831   |
| 12.55  | 0.83  | 2.747 |                        |           |
| 7.64   | -9.15 | 3.425 |                        |           |
| 45.77  | 6.22  | 3.18  | Peptidase M12B         | 213-414   |
| 16.61  | -0.36 | 4.5   | LRRNT                  | 53-91     |
| 18.31  | -2.04 | 4.019 |                        |           |
| 13.08  | -1.1  | 6.601 |                        |           |
| 12.96  | -0.09 | 4.615 | Ig-like V-type 1       | 28-120    |
| 83.78  | -0.79 | 6.082 | Ig-like V-type 2       | 125-234   |
| 104.52 | 2.7   | 3.374 | Ig-like C2-type 1      | 245-328   |
| 11.40  | 0.19  | 2.233 | Ig-like C2-type 1      | 245-328   |
| 58.77  | -0.04 | 5.09  | Ig-like C2-type 3      | 416-501   |
| 19.84  | -8.7  | 3.44  | Ig-like C2-type 3      | 416-501   |
| 12.36  | 9.63  | 2.722 | Cadherin 2             | 161-273   |
| 12.31  | -0.82 | 3.135 | Cadherin 4             | 389-503   |
| 37.04  | 1.3   | 2.375 |                        |           |
| >200   | -1.04 | 4.386 | PKD                    | 240-327   |
| >200   | -0.48 | 4.271 |                        |           |
| 12.48  | -0.56 | 2.297 | Ig-like V-type         | 31-141    |
| >200   | 3.59  | 2.543 | Ig-like C2-type 1      | 149-238   |
| 22.49  | -0.73 | 2.729 | Ig-like C2-type 2      | 247-334   |
| 51.80  | 4.15  | 4.717 | Fibronectin type-III 2 | 392-488   |
| 6.61   | 1.12  | 2.373 |                        |           |
| 19.14  | 2.82  | 3.082 |                        |           |
| 21.40  | -9.26 | 4.491 |                        |           |
| 7.30   | -0.71 | 2.048 |                        |           |
| 54.41  | 3     | 4.337 |                        |           |
| 6.85   | -3.88 | 2.899 | Ig-like C2-type        | 207-296   |
| 11.91  | 0.46  | 6.357 |                        |           |
| 57.49  | -2.94 | 2.672 |                        |           |
| >200   | 1.76  | 2.716 | Ig-like C1-type        | 207-296   |
| 10.74  | -0.59 | 3.427 | Ig-like C2-type        | 207-296   |
| 39.07  | 4.44  | 5.167 |                        |           |
| >200   | -0.77 | 3.865 |                        |           |
| 22.65  | 5.96  | 2.938 |                        |           |
| >200   | -0.19 | 1.937 |                        |           |
| 22.36  | -2.16 | 2.875 |                        |           |
| 19.87  | -8.06 | 2.231 |                        |           |
| 29.81  | 0.35  | 2.446 | Ig-like C2-type 6      | 496-585   |
| 41.97  | -7.23 | 1.94  |                        |           |
| 55.49  | -1.1  | 2.034 |                        |           |
| 5.60   | 6.64  | 1.987 | Calx-beta 4            | 2118-2220 |

|        |       |       |                        |             |
|--------|-------|-------|------------------------|-------------|
| 13.84  | -0.77 | 3.064 | VWFA                   | 228-443     |
| 14.86  | 3.78  | 4.905 | Ig-like V-type 1       | 29-139      |
| 18.59  | -1.17 | 3.712 | Ig-like V-type 1       | 29-139      |
| 26.63  | 0.3   | 2.795 | Ig-like C2-type 1      | 145-238     |
| 18.19  | -0.67 | 2.576 |                        |             |
| >200   | 3.9   | 3.23  |                        |             |
| 12.06  | -2.86 | 5.72  |                        |             |
| 30.34  | -1.24 | 5.844 |                        |             |
| 38.62  | -0.15 | 2.826 |                        |             |
| 16.43  | -1.57 | 3.722 |                        |             |
| 9.14   | -4.19 | 1.694 |                        |             |
| 8.03   | 0.36  | 3.255 |                        |             |
| 7.42   | 5.3   | 2.83  |                        |             |
| 8.64   | -1.52 | 1.831 | TSP type-1 2           | 676-737     |
| 14.20  | -7.52 | 2.082 |                        |             |
| 25.50  | -1.72 | 1.93  | Fibronectin type-III 1 | 1704-1800   |
| 23.83  | 9.36  | 2.48  | CUB                    | 41-149      |
| 10.55  | 8.14  | 3.828 |                        |             |
| >200   | -1.39 | 4.373 |                        |             |
| 127.09 | -0.39 | 5.22  |                        |             |
| 15.63  | -0.13 | 2.044 |                        |             |
| 5.76   | -1.83 | 2.678 |                        |             |
| 18.72  | -6.74 | 3.788 | Ig-like C2-type 4      | 311-404     |
| 17.92  | 4.18  | 3.001 |                        |             |
| 14.68  | 0.34  | 2.026 | Ig-like C2-type 2      | 147-237     |
| >200   | -5.46 | 3.921 | Ig-like C2-type 12     | 1161-1242   |
| 8.96   | 7.68  | 3.408 | CUB                    | 41-150      |
| >200   | -1.43 | 3.508 | PA                     | 67-175      |
| 25.79  | 5.58  | 3.834 | Ig-like V-type         | 21-119      |
| 12.49  | -2.29 | 2.812 | Cadherin 5             | 454-563     |
| 18.43  | -1.15 | 2.227 |                        |             |
| 54.28  | -1.21 | 1.693 | SEA 3                  | 12368-12504 |
| 38.97  | 8.46  | 3.79  |                        |             |
| 33.47  | 0.68  | 2.011 |                        |             |
| 61.08  | 0.06  | 4.161 |                        |             |
| 108.78 | -1.59 | 3.755 |                        |             |
| 26.92  | -1.4  | 4.717 |                        |             |
| 28.36  | -0.59 | 2.989 | Ig-like 2              | 141-235     |
| 21.65  | 0.96  | 4.873 | Ig-like 3              | 267-356     |
| 15.33  | -0.47 | 4.535 | Fibronectin type-III 3 | 848-950     |
| 21.64  | -2.53 | 2.794 | Fibronectin type-III 4 | 954-1051    |
| 9.71   | 4.88  | 1.967 | Sema                   | 22-500      |
| 32.03  | 2.9   | 3.621 |                        |             |

|        |       |       |                   |           |
|--------|-------|-------|-------------------|-----------|
| >200   | 0.87  | 2.068 |                   |           |
| 37.88  | -0.92 | 4.065 |                   |           |
| 27.56  | -1.95 | 1.664 | Ig-like C2-type 2 | 248-331   |
| >200   | 4.28  | 2.757 |                   |           |
| 25.11  | 3.2   | 3.627 |                   |           |
| 7.50   | 0.92  | 4.376 |                   |           |
| 37.56  | -0.69 | 2.117 |                   |           |
| 10.54  | -1.41 | 4.664 | Ig-like V-type    | 45-139    |
| 36.89  | 5.67  | 4.015 | Ig-like V-type    | 45-139    |
| 11.02  | 3.55  | 4.095 | Sema              | 30-497    |
| 11.44  | 0.99  | 3.67  | Sema              | 30-497    |
| 16.73  | -2.13 | 3.546 | PSI               | 499-551   |
| 34.72  | -0.05 | 7.212 | Thioredoxin       | 47-175    |
| 17.73  | 5.56  | 5.613 |                   |           |
| 11.28  | 1.97  | 3.632 | Cadherin 4        | 365-469   |
| 23.49  | 0.3   | 2.113 |                   |           |
| 9.55   | 0.53  | 9.089 | Cadherin 9        | 1028-1146 |
| 6.54   | 2.56  | 4.733 | Cadherin 9        | 1028-1146 |
| 46.98  | -1.95 | 4.327 | Laminin G-like 2  | 1614-1971 |
| 5.19   | -6.28 | 2.261 | EGF-like 7        | 1883-1922 |
| 9.17   | -2.37 | 3.454 |                   |           |
| 10.06  | 7.59  | 2.778 |                   |           |
| 11.16  | -1.93 | 2.983 |                   |           |
| 13.93  | -0.83 | 2.247 | Ig-like C2-type 1 | 21-128    |
| 19.13  | -3.9  | 3.703 | Sema              | 42-518    |
| 7.21   | 2.14  | 4.152 | Laminin G-like 1  | 1442-1646 |
| 16.38  | -0.5  | 3.746 |                   |           |
| 12.68  | 1.23  | 1.518 |                   |           |
| 15.55  | -0.5  | 2.379 | Ig-like C2-type 3 | 276-394   |
| 10.55  | -1.69 | 4.472 | Ig-like C2-type 5 | 544-662   |
| >200   | -8.16 | 2.751 |                   |           |
| 29.95  | -0.77 | 2.699 | VWFD              | 446-667   |
| 21.68  | 3.15  | 1.923 | G8                | 121-245   |
| 130.82 | 7.31  | 3.252 |                   |           |
| 20.88  | -0.34 | 3.322 |                   |           |
| 7.86   | -0.75 | 1.936 |                   |           |
| 11.51  | 3.2   | 2.711 |                   |           |
| 8.09   | -0.7  | 3.744 | Sema              | 27-512    |
| 8.63   | -2.66 | 2.365 | IPT/TIG 2         | 961-104   |
| 52.95  | 1.09  | 2.63  |                   |           |
| >200   | 0.96  | 3.459 |                   |           |
| 18.68  | 0.75  | 4.657 | EGF-like 30       | 1160-1203 |
| 11.80  | 4.38  | 2.025 |                   |           |

|       |       |       |                      |         |
|-------|-------|-------|----------------------|---------|
| 29.86 | -2.7  | 2.866 |                      |         |
| 18.89 | -0.05 | 3.121 |                      |         |
| 21.51 | 4     | 3.437 |                      |         |
| 21.21 | 6.55  | 4.349 | Sema                 | 47-546  |
| >200  | -0.72 | 3.349 |                      |         |
| 22.33 | -4.82 | 3.61  |                      |         |
| >200  | 0.9   | 2.771 |                      |         |
| 9.36  | -0.43 | 5.059 |                      |         |
| 9.68  | 4.96  | 4.449 | LDL-receptor class A | 452-487 |
| 18.19 | -0.18 | 3.03  | Ig-like 2            | 148-235 |
| 20.03 | -3.71 | 2.871 | Ig-like 2            | 148-235 |
| 22.52 | 9.44  | 3.883 |                      |         |
| 30.61 | -2.17 | 2.366 |                      |         |

---

## Annotation

---

ANO9\_HUMAN Anoctamin-9  
CA233\_HUMAN Fibronectin type-III domain-containing transmembrane protein C1orf233  
ADA10\_HUMAN Disintegrin and metalloproteinase domain-containing protein 10  
NRP1\_HUMAN Neuropilin-1  
NRP1\_HUMAN Neuropilin-1  
PLXB2\_HUMAN Plexin-B2  
PLXB2\_HUMAN Plexin-B2  
PLXB2\_HUMAN Plexin-B2  
PLXB2\_HUMAN Plexin-B2  
PLXB2\_HUMAN Plexin-B2  
LAMA5\_HUMAN Laminin subunit alpha-5  
LAMA5\_HUMAN Laminin subunit alpha-5  
TMPS2\_HUMAN Transmembrane protease serine 2  
NCAM2\_HUMAN Neural cell adhesion molecule 2  
NCAM2\_HUMAN Neural cell adhesion molecule 2  
PLXB1\_HUMAN Plexin-B1  
GPR39\_HUMAN G-protein coupled receptor 39  
MPZL2\_HUMAN Myelin protein zero-like protein 2  
TLR2\_HUMAN Toll-like receptor 2  
TSN3\_HUMAN Tetraspanin-3  
RAMP3\_HUMAN Receptor activity-modifying protein 3  
IGSF3\_HUMAN Immunoglobulin superfamily member 3  
ICOSL\_HUMAN ICOS ligand  
ICOSL\_HUMAN ICOS ligand  
ATRN\_HUMAN Attractin  
ATRN\_HUMAN Attractin  
S22A5\_HUMAN Solute carrier family 22 member 5  
S22A5\_HUMAN Solute carrier family 22 member 5  
ACL6B\_HUMAN Actin-like protein 6B  
PRS23\_HUMAN Serine protease 23  
S1PR2\_HUMAN Sphingosine 1-phosphate receptor 2  
LYPD3\_HUMAN Ly6/PLAUR domain-containing protein 3  
LYPD3\_HUMAN Ly6/PLAUR domain-containing protein 3  
MPZL1\_HUMAN Myelin protein zero-like protein 1  
TSN15\_HUMAN Tetraspanin-15  
1A02\_HUMAN HLA class I histocompatibility antigen, A-2 alpha chain

TFR1\_HUMAN Transferrin receptor protein 1  
PRIO\_HUMAN Major prion protein  
G3P\_HUMAN Glyceraldehyde-3-phosphate dehydrogenase  
G3P\_HUMAN Glyceraldehyde-3-phosphate dehydrogenase  
ERBB2\_HUMAN Receptor tyrosine-protein kinase erbB-2  
AT1B1\_HUMAN Sodium/potassium-transporting ATPase subunit beta-1  
AT1B1\_HUMAN Sodium/potassium-transporting ATPase subunit beta-1  
ICAM1\_HUMAN Intercellular adhesion molecule 1  
ITB1\_HUMAN Integrin beta-1  
INSR\_HUMAN Insulin receptor  
CEAM5\_HUMAN Carcinoembryonic antigen-related cell adhesion molecule 5  
ITAV\_HUMAN Integrin alpha-V  
ITAV\_HUMAN Integrin alpha-V  
ITAV\_HUMAN Integrin alpha-V  
CATD\_HUMAN\_contaminant Cathepsin D  
SAP\_HUMAN Prosaposin  
IGF1R\_HUMAN Insulin-like growth factor 1 receptor  
IGF1R\_HUMAN Insulin-like growth factor 1 receptor  
IGF1R\_HUMAN Insulin-like growth factor 1 receptor  
DAF\_HUMAN Complement decay-accelerating factor  
4F2\_HUMAN 4F2 cell-surface antigen heavy chain  
4F2\_HUMAN 4F2 cell-surface antigen heavy chain  
4F2\_HUMAN 4F2 cell-surface antigen heavy chain  
NEP\_HUMAN Nephilysin  
ITA5\_HUMAN Integrin alpha-5  
ITA5\_HUMAN Integrin alpha-5  
ITA5\_HUMAN Integrin alpha-5  
TACD2\_HUMAN Tumor-associated calcium signal transducer 2  
TACD2\_HUMAN Tumor-associated calcium signal transducer 2  
TACD2\_HUMAN Tumor-associated calcium signal transducer 2  
PTPRF\_HUMAN Receptor-type tyrosine-protein phosphatase F  
CLUS\_HUMAN Clusterin  
CLUS\_HUMAN Clusterin  
LAMC1\_HUMAN Laminin subunit gamma-1  
LAMC1\_HUMAN Laminin subunit gamma-1  
LAMC1\_HUMAN Laminin subunit gamma-1

GTR1\_HUMAN Solute carrier family 2, facilitated glucose transporter member 1  
LAMP1\_HUMAN Lysosome-associated membrane glycoprotein 1  
LAMP1\_HUMAN Lysosome-associated membrane glycoprotein 1  
LAMP1\_HUMAN Lysosome-associated membrane glycoprotein 1  
FGFR1\_HUMAN Fibroblast growth factor receptor 1  
MPRI\_HUMAN Cation-independent mannose-6-phosphate receptor  
ACE\_HUMAN Angiotensin-converting enzyme  
ACE\_HUMAN Angiotensin-converting enzyme  
LAMP2\_HUMAN Lysosome-associated membrane glycoprotein 2  
LAMP2\_HUMAN Lysosome-associated membrane glycoprotein 2  
LAMP2\_HUMAN Lysosome-associated membrane glycoprotein 2  
PVR\_HUMAN Poliovirus receptor  
INGR1\_HUMAN Interferon gamma receptor 1  
CD44\_HUMAN CD44 antigen  
ITB4\_HUMAN Integrin beta-4  
EPCAM\_HUMAN Epithelial cell adhesion molecule  
EPCAM\_HUMAN Epithelial cell adhesion molecule  
INAR1\_HUMAN Interferon alpha/beta receptor 1  
INAR1\_HUMAN Interferon alpha/beta receptor 1  
ITA2\_HUMAN Integrin alpha-2  
ITA2\_HUMAN Integrin alpha-2  
ITA2\_HUMAN Integrin alpha-2  
ITB6\_HUMAN Integrin beta-6  
LFA3\_HUMAN Lymphocyte function-associated antigen 3  
MPRD\_HUMAN Cation-dependent mannose-6-phosphate receptor  
MPRD\_HUMAN Cation-dependent mannose-6-phosphate receptor  
5NTD\_HUMAN 5'-nucleotidase  
5NTD\_HUMAN 5'-nucleotidase  
ERBB3\_HUMAN Receptor tyrosine-protein kinase erbB-3  
ERBB3\_HUMAN Receptor tyrosine-protein kinase erbB-3  
CADH3\_HUMAN Cadherin-3  
ENPP1\_HUMAN Ectonucleotide pyrophosphatase/phosphodiesterase family member 1  
ENPP1\_HUMAN Ectonucleotide pyrophosphatase/phosphodiesterase family member 1  
ENPP1\_HUMAN Ectonucleotide pyrophosphatase/phosphodiesterase family member 1  
ITA6\_HUMAN Integrin alpha-6  
TNR6\_HUMAN Tumor necrosis factor receptor superfamily member 6  
ITA3\_HUMAN Integrin alpha-3  
ITA3\_HUMAN Integrin alpha-3  
ITA3\_HUMAN Integrin alpha-3  
ITB8\_HUMAN Integrin beta-8  
CD82\_HUMAN CD82 antigen  
EPHB2\_HUMAN Ephrin type-B receptor 2  
1B15\_HUMAN HLA class I histocompatibility antigen, B-15 alpha chain

CTR1\_HUMAN High affinity cationic amino acid transporter 1  
CTR1\_HUMAN High affinity cationic amino acid transporter 1  
CALCR\_HUMAN Calcitonin receptor  
L1CAM\_HUMAN Neural cell adhesion molecule L1  
L1CAM\_HUMAN Neural cell adhesion molecule L1  
L1CAM\_HUMAN Neural cell adhesion molecule L1  
GPC1\_HUMAN Glypican-1  
BASI\_HUMAN Basigin  
BASI\_HUMAN Basigin  
TNR3\_HUMAN Tumor necrosis factor receptor superfamily member 3  
IL6RB\_HUMAN Interleukin-6 receptor subunit beta  
IL6RB\_HUMAN Interleukin-6 receptor subunit beta  
ECE1\_HUMAN Endothelin-converting enzyme 1  
ECE1\_HUMAN Endothelin-converting enzyme 1  
ECE1\_HUMAN Endothelin-converting enzyme 1  
ECE1\_HUMAN Endothelin-converting enzyme 1  
CD97\_HUMAN CD97 antigen  
CD97\_HUMAN CD97 antigen  
SERPH\_HUMAN Serpin H1  
BCAM\_HUMAN Basal cell adhesion molecule  
CLCN5\_HUMAN H(+)/Cl(-) exchange transporter 5  
PLXA3\_HUMAN Plexin-A3  
CTR2\_HUMAN Low affinity cationic amino acid transporter 2  
EFNA3\_HUMAN Ephrin-A3  
PTTG\_HUMAN Pituitary tumor-transforming gene 1 protein-interacting protein  
AT1B3\_HUMAN Sodium/potassium-transporting ATPase subunit beta-3  
LAMB2\_HUMAN Laminin subunit beta-2  
GFRA1\_HUMAN GDNF family receptor alpha-1  
GFRA1\_HUMAN GDNF family receptor alpha-1  
GFRA1\_HUMAN GDNF family receptor alpha-1  
ADA17\_HUMAN Disintegrin and metalloproteinase domain-containing protein 17  
ADA17\_HUMAN Disintegrin and metalloproteinase domain-containing protein 17  
ADA17\_HUMAN Disintegrin and metalloproteinase domain-containing protein 17  
PGBM\_HUMAN Basement membrane-specific heparan sulfate proteoglycan core protein  
DSC2\_HUMAN Desmocollin-2  
UPAR\_HUMAN Urokinase plasminogen activator surface receptor  
NOTC2\_HUMAN Neurogenic locus notch homolog protein 2  
LRP1\_HUMAN Prolow-density lipoprotein receptor-related protein 1  
I10R2\_HUMAN Interleukin-10 receptor subunit beta  
CD47\_HUMAN Leukocyte surface antigen CD47

PTK7\_HUMAN Inactive tyrosine-protein kinase 7  
PTPRS\_HUMAN Receptor-type tyrosine-protein phosphatase S  
S39A6\_HUMAN Zinc transporter ZIP6  
S39A6\_HUMAN Zinc transporter ZIP6  
ADA15\_HUMAN Disintegrin and metalloproteinase domain-containing protein 15  
TPBG\_HUMAN Trophoblast glycoprotein  
TPBG\_HUMAN Trophoblast glycoprotein  
TPBG\_HUMAN Trophoblast glycoprotein  
CD166\_HUMAN CD166 antigen  
CD166\_HUMAN Isoform 2 of CD166 antigen  
DSG2\_HUMAN Desmoglein-2  
DSG2\_HUMAN Desmoglein-2  
S29A2\_HUMAN Equilibrative nucleoside transporter 2  
GPNMB\_HUMAN Transmembrane glycoprotein NMB  
S39AE\_HUMAN Zinc transporter ZIP14  
PVRL1\_HUMAN Poliovirus receptor-related protein 1  
PVRL1\_HUMAN Poliovirus receptor-related protein 1  
PVRL1\_HUMAN Poliovirus receptor-related protein 1  
PTPRK\_HUMAN Receptor-type tyrosine-protein phosphatase kappa  
ERBB4\_HUMAN Receptor tyrosine-protein kinase erbB-4  
ERBB4\_HUMAN Receptor tyrosine-protein kinase erbB-4  
AAAT\_HUMAN Neutral amino acid transporter B(0)  
EFNB3\_HUMAN Ephrin-B3  
VAS1\_HUMAN V-type proton ATPase subunit S1  
MICB\_HUMAN MHC class I polypeptide-related sequence B  
MICA\_HUMAN MHC class I polypeptide-related sequence A  
CC50B\_HUMAN Cell cycle control protein 50B  
CC50B\_HUMAN Cell cycle control protein 50B  
ANO6\_HUMAN Anoctamin-6  
ANO6\_HUMAN Anoctamin-6  
NADL2\_HUMAN Inactive N-acetylated-alpha-linked acidic dipeptidase-like protein 2  
NADL2\_HUMAN Inactive N-acetylated-alpha-linked acidic dipeptidase-like protein 2  
SDK2\_HUMAN Protein sidekick-2  
MKS3\_HUMAN Meckelin  
ENTP8\_HUMAN Ectonucleoside triphosphate diphosphohydrolase 8  
FREM2\_HUMAN FRAS1-related extracellular matrix protein 2

CAHD1\_HUMAN VWFA and cache domain-containing protein 1  
CD276\_HUMAN CD276 antigen  
CD276\_HUMAN CD276 antigen  
CD276\_HUMAN CD276 antigen  
STEAP3\_HUMAN Metalloreductase STEAP3  
VASN\_HUMAN Vasorin  
RET1G\_HUMAN Retinoic acid early transcript 1G protein  
CNNM4\_HUMAN Metal transporter CNNM4  
CNNM4\_HUMAN Metal transporter CNNM4  
SE6L2\_HUMAN Seizure 6-like protein 2  
NPNT\_HUMAN Nephronectin  
CD109\_HUMAN CD109 antigen  
CD109\_HUMAN CD109 antigen  
THSD4\_HUMAN Thrombospondin type-1 domain-containing protein 4  
TMM26\_HUMAN Transmembrane protein 26  
SDK1\_HUMAN Protein sidekick-1  
GP126\_HUMAN G-protein coupled receptor 126  
GP126\_HUMAN G-protein coupled receptor 126  
OSTM1\_HUMAN Osteopetrosis-associated transmembrane protein 1  
CTL2\_HUMAN Choline transporter-like protein 2  
LRC8A\_HUMAN Leucine-rich repeat-containing protein 8A  
SULF2\_HUMAN Extracellular sulfatase Sulf-2  
VSI10\_HUMAN V-set and immunoglobulin domain-containing protein 10  
PROM2\_HUMAN Prominin-2  
FGRL1\_HUMAN Fibroblast growth factor receptor-like 1  
IGSF1\_HUMAN Immunoglobulin superfamily member 1  
DCBD1\_HUMAN Discoidin, CUB and LCCL domain-containing protein 1  
RN149\_HUMAN E3 ubiquitin-protein ligase RNF149  
CADM4\_HUMAN Cell adhesion molecule 4  
PCD19\_HUMAN Protocadherin-19  
LIPH\_HUMAN Lipase member H  
MUC16\_HUMAN Mucin-16  
PIEZ1\_HUMAN Piezo-type mechanosensitive ion channel component 1  
PIEZ1\_HUMAN Piezo-type mechanosensitive ion channel component 1  
NICA\_HUMAN Nicastrin  
NICA\_HUMAN Nicastrin  
NICA\_HUMAN Nicastrin  
NRCAM\_HUMAN Neuronal cell adhesion molecule  
SEM4D\_HUMAN Semaphorin-4D  
CA159\_HUMAN Uncharacterized protein C1orf159

TM87B\_HUMAN Transmembrane protein 87B  
PCFT\_HUMAN Proton-coupled folate transporter  
PVRL4\_HUMAN Poliovirus receptor-related protein 4  
MYCT\_HUMAN Proton myo-inositol cotransporter  
PANX1\_HUMAN Pannexin-1  
SORT\_HUMAN Sortilin  
P2RX4\_HUMAN P2X purinoceptor 4  
CADM1\_HUMAN Cell adhesion molecule 1  
CADM1\_HUMAN Cell adhesion molecule 1  
SEM4C\_HUMAN Semaphorin-4C  
SEM4C\_HUMAN Semaphorin-4C  
SEM4C\_HUMAN Semaphorin-4C  
MAGT1\_HUMAN Magnesium transporter protein 1  
ITFG3\_HUMAN Protein ITFG3  
PCDH9\_HUMAN Protocadherin-9  
TMM8A\_HUMAN Transmembrane protein 8A  
CELR2\_HUMAN Cadherin EGF LAG seven-pass G-type receptor 2  
APMAP\_HUMAN Adipocyte plasma membrane-associated protein  
IL1AP\_HUMAN Interleukin-1 receptor accessory protein  
SEM4B\_HUMAN Semaphorin-4B  
CELR1\_HUMAN Cadherin EGF LAG seven-pass G-type receptor 1  
CELR1\_HUMAN Cadherin EGF LAG seven-pass G-type receptor 1  
JKAMP\_HUMAN JNK1/MAPK8-associated membrane protein  
FPRP\_HUMAN Prostaglandin F2 receptor negative regulator  
FPRP\_HUMAN Prostaglandin F2 receptor negative regulator  
SUSD2\_HUMAN Sushi domain-containing protein 2  
SUSD2\_HUMAN Sushi domain-containing protein 2  
TMEM2\_HUMAN Transmembrane protein 2  
TMEM2\_HUMAN Transmembrane protein 2  
TMEM2\_HUMAN Transmembrane protein 2  
TMEM2\_HUMAN Transmembrane protein 2  
SO3A1\_HUMAN Solute carrier organic anion transporter family member 3A1  
PLXA1\_HUMAN Plexin-A1  
PLXA1\_HUMAN Plexin-A1  
S39AA\_HUMAN Zinc transporter ZIP10  
HEG1\_HUMAN Protein HEG homolog 1  
NOTC3\_HUMAN Neurogenic locus notch homolog protein 3  
S6A14\_HUMAN Sodium- and chloride-dependent neutral and basic amino acid transporter B(0+)

S6A14\_HUMAN Sodium- and chloride-dependent neutral and basic amino acid transporter B(0+)  
S6A14\_HUMAN Sodium- and chloride-dependent neutral and basic amino acid transporter B(0+)  
FZD1\_HUMAN Frizzled-1  
PLXD1\_HUMAN Plexin-D1  
PLXD1\_HUMAN Plexin-D1  
HYOU1\_HUMAN Hypoxia up-regulated protein 1  
HYOU1\_HUMAN Hypoxia up-regulated protein 1  
ENTP2\_HUMAN Ectonucleoside triphosphate diphosphohydrolase 2  
ST14\_HUMAN Suppressor of tumorigenicity 14 protein  
NPTN\_HUMAN Neuroplastin  
NPTN\_HUMAN Neuroplastin  
S4A7\_HUMAN Sodium bicarbonate cotransporter 3  
S4A7\_HUMAN Sodium bicarbonate cotransporter 3

**Table S4 - The Half-Lives of 318 Unique Glycosylati**

| <b>Uniprot ID</b> | <b>Gene Symbol</b> | <b>Site</b> | <b>ModScore</b> | <b>ModScore Peptide</b> |
|-------------------|--------------------|-------------|-----------------|-------------------------|
| A8MWY0            | KIAA1324L          | 560         | 1000            | K.N#ATFTFTWAFQR.T       |
| O14494            | PPAP2A             | 142         | 1000            | K.IN#CSDGYIEYYICR.G     |
| O14672            | ADAM10             | 439         | 1000            | R.N#ISQVLEK.K           |
| O14786            | NRP1               | 150         | 1000            | K.RGPECSQN#YTTPSGVIK.S  |
| O14786            | NRP1               | 522         | 24.44           | K.IGYSNN#GSDWK.M        |
| O15031            | PLXNB2             | 127         | 1000            | R.ALSN#ISLR.L           |
| O15031            | PLXNB2             | 528         | 1000            | K.SCVAVTSAQPQN#MSR.R    |
| O15031            | PLXNB2             | 733         | 1000            | K.LSHDAN#ETLPLHLYVK.S   |
| O15031            | PLXNB2             | 1049        | 1000            | R.EAESLQPM*TVVGTDYVFF   |
| O15230            | LAMA5              | 2196        | 1000            | R.GIN#ASSMAWAR.L        |
| O15230            | LAMA5              | 2423        | 1000            | R.KQELSRDN#ATLQATLHAA   |
| O15230            | LAMA5              | 3107        | 1000            | K.RLN#TTGVSAGCTADLLVC   |
| O15394            | NCAM2              | 219         | 1000            | K.SFN#ATAERGEEMTFSCR.A  |
| O15394            | NCAM2              | 474         | 39.66           | R.YN#CTATNHIGTR.F       |
| O15394            | NCAM2              | 562         | 18.81           | R.SHGVQTM*VVLNLEPN#I    |
| O43157            | PLXNB1             | 1253        | 1000            | K.YTLDPN#ITSAGPTK.S     |
| O43688            | PPAP2C             | 139         | 1000            | R.VN#CSVYVQLEK.V        |
| O60487            | MPZL2              | 39          | 1000            | R.VLEAVN#GTDAR.L        |
| O60637            | TSPAN3             | 127         | 24.24           | K.TYN#GTNPDAASR.A       |
| O60814            | HIST1H2BK          | 64          | 20.17           | K.AMGIMN#SfvNDIFER.I    |
| O60896            | RAMP3              | 103         | 1000            | R.QFFSN#CTVDR.V         |
| O75054            | IGSF3              | 101         | 1000            | R.VQGN#STLLHITDLQAR.D   |
| O75054            | IGSF3              | 825         | 1000            | R.LSQAQGN#LSVLETR.Q     |
| O75054            | IGSF3              | 842         | 1000            | R.QVQLECVVLN#R.T        |
| O75054            | IGSF3              | 961         | 1000            | K.RAEDTAGQTALTVMRPDA    |
| O75144            | ICOSLG             | 70          | 15.38           | K.TVVTYHIPQN#SSLENVDSI  |
| O75144            | ICOSLG             | 102         | 1000            | R.LFN#VTPQDEQK.F        |
| O75882            | ATRN               | 1082        | 1000            | K.CEN#LTTGK.H           |
| O75954            | TSPAN9             | 180         | 1000            | R.N#ATTPLWR.T           |
| O76082            | SLC22A5            | 57          | 1000            | R.CRVPDAAN#LSSAWR.N     |
| O95084            | PRSS23             | 207         | 1000            | R.GAN#DSTSAMPEQMK.F     |
| O95136            | S1PR2              | 19          | 1000            | K.VQEHYN#YTK.E          |
| O95196            | CSPG5              | 355         | 1000            | R.DLASSEN#GTECR.S       |
| O95274            | LYPD3              | 118         | 1000            | K.LN#LTSR.A             |
| O95274            | LYPD3              | 163         | 1000            | R.EACQGTSPVVCYN#ASD     |
| O95274            | LYPD3              | 227         | 39.66           | R.CNSDLRN#K.T           |
| O95297            | MPZL1              | 50          | 1000            | K.EIFVAN#GTQGK.L        |
| O95857            | TSPAN13            | 137         | 17.01           | R.SVNPNDTCLASCVK.S      |
| O95858            | TSPAN15            | 189         | 71.75           | R.N#TTEVVNTMCGYK.T      |
| P01892            | HLA-A              | 110         | 1000            | R.GYYN#QSEAGSHTVQR.M    |

|        |         |     |        |                         |
|--------|---------|-----|--------|-------------------------|
| P02786 | TFRC    | 251 | 1000   | K.DFEDLYTPVN#GSIVIVR.A  |
| P02786 | TFRC    | 727 | 84.61  | R.KQNNGAFN#ETLFR.N      |
| P04156 | PRNP    | 197 | 1000   | K.QHTVTTTTKGEN#FTETDV   |
| P04406 | GAPDH   | 9   | 1000   | K.VGVN#GFGR.I           |
| P04406 | GAPDH   | 225 | 1000   | K.VIPELN#GK.L           |
| P04626 | ERBB2   | 530 | 1000   | R.GHCWGPPTQCVN#CSQFI    |
| P05026 | ATP1B1  | 193 | 1000   | R.VLGFKPKPPKN#ESLETYPV  |
| P05026 | ATP1B1  | 265 | 1000   | K.YLQPLLAVQFTN#LTM*DT   |
| P05362 | ICAM1   | 145 | 1000   | R.AN#LTVVLLR.G          |
| P05362 | ICAM1   | 267 | 51.81  | R.LNPTVITYGN#DSFSAK.A   |
| P05556 | ITGB1   | 212 | 38.78  | K.LRNPCTSEQN#CTSPFSYK.I |
| P05556 | ITGB1   | 406 | 73.31  | K.NGVN#GTGENGR.K        |
| P05556 | ITGB1   | 481 | 1000   | K.CHEGN#GTFECGACR.C     |
| P05556 | ITGB1   | 520 | 94.66  | R.KEN#SSEICSNNGECVCGQC  |
| P06213 | INSR    | 920 | 1000   | R.GLSPGN#YSVR.I         |
| P06280 | GLA     | 215 | 1000   | R.SIVYSCEWPLYM*WPFQKP   |
| P06731 | CEACAM5 | 152 | 13.38  | R.VYPELPKPSISSN#NSKPVEI |
| P06731 | CEACAM5 | 204 | 1000   | R.TLTLFN#VTR.N          |
| P06731 | CEACAM5 | 246 | 75.74  | R.RSDSVILNVLYGPDAPTISP  |
| P06731 | CEACAM5 | 375 | 48.87  | R.LQLSNDN#R.T           |
| P06731 | CEACAM5 | 508 | 14.97  | K.TITVSAELPKPSISSN#NSKP |
| P06731 | CEACAM5 | 665 | 24.44  | R.N#NSIVK.S             |
| P06756 | ITGAV   | 74  | 1000   | K.AN#TTQPGIVEGGQVLK.C   |
| P06756 | ITGAV   | 554 | 1000   | K.N#MTISR.G             |
| P06756 | ITGAV   | 704 | 1000   | R.LSCAFKTEN#QTR.Q       |
| P06756 | ITGAV   | 874 | 1000   | K.ISSLQTTEKN#DTVAGQGEI  |
| P08069 | IGF1R   | 244 | 66.98  | K.RACTENNECCHPECLGSCS   |
| P08069 | IGF1R   | 900 | 53.53  | R.LNPGN#YTAR.I          |
| P08069 | IGF1R   | 913 | 1000   | R.IQATSLSGN#GSWTDPVFFY  |
| P08174 | CD55    | 95  | 1000   | K.GSQWSDIEEFCN#R.S      |
| P08195 | SLC3A2  | 365 | 1000   | K.DASSFLAEWQN#ITK.G     |
| P08195 | SLC3A2  | 381 | 128.04 | K.GFSEDRLLIAGTN#SSDLQC  |
| P08195 | SLC3A2  | 424 | 44.28  | K.SLVTQYLN#ATGNR.W      |
| P08473 | MME     | 145 | 1000   | R.SCIN#ESAIDSR.G        |
| P08473 | MME     | 285 | 38.18  | K.EIAN#ATAKPEDRNDPMLL   |
| P08648 | ITGA5   | 593 | 1000   | K.IYLRN#ESEFRDK.L       |
| P08648 | ITGA5   | 773 | 24.44  | K.NLN#NSQSDVVSFR.L      |
| P08648 | ITGA5   | 868 | 18.81  | R.VTGLN#CTTNHPINPK.G    |
| P09758 | TACSTD2 | 120 | 70.91  | K.ARQCN#QTSVCWCVNSVG    |
| P09758 | TACSTD2 | 168 | 1000   | R.HRPTAGAFN#HSDLDAELR   |
| P09758 | TACSTD2 | 208 | 1000   | K.FVAAVHYEQPTIQIELRQN#  |
| P10586 | PTPRF   | 966 | 40.36  | R.DINSQQELQN#ITTDTR.F   |
| P10909 | CLU     | 291 | 1000   | R.EIRHN#STGCLR.M        |

|        |        |      |       |                         |
|--------|--------|------|-------|-------------------------|
| P11047 | LAMC1  | 1022 | 25.17 | R.EGFVGNRCDQCEENYFYFN#  |
| P11047 | LAMC1  | 1107 | 24.44 | R.VN#NTLSSQISR.L        |
| P11047 | LAMC1  | 1395 | 29.67 | R.KIPAIN#QTITEANEK.T    |
| P11047 | LAMC1  | 1439 | 1000  | K.N#ATSTK.A             |
| P11166 | SLC2A1 | 45   | 1000  | K.VIEEFYN#QTWVHR.Y      |
| P11279 | LAMP1  | 84   | 1000  | R.SSCGKEN#TSDPSLVIAFGR  |
| P11279 | LAMP1  | 103  | 1000  | R.GHTLTLN#FTR.N         |
| P11279 | LAMP1  | 249  | 1000  | R.KDN#TTVTR.L           |
| P11279 | LAMP1  | 307  | 1000  | R.FFLQGIQLN#TILPDARDPAI |
| P11717 | IGF2R  | 2085 | 1000  | K.GYPCGGN#K.T           |
| P12821 | ACE    | 146  | 97.60 | K.RQQYNALLSN#MSR.I      |
| P12821 | ACE    | 695  | 30.61 | K.NMQIAN#HTLK.Y         |
| P13473 | LAMP2  | 49   | 1000  | K.WQM*N#FTVR.Y          |
| P13473 | LAMP2  | 58   | 1000  | R.YETTN#K.T             |
| P13473 | LAMP2  | 101  | 1000  | K.IAVQFGPGFSWIAN#FTK.A  |
| P13473 | LAMP2  | 275  | 1000  | R.LN#SSTIK.Y            |
| P13473 | LAMP2  | 356  | 1000  | R.VQPFN#VTQ GK.Y        |
| P13987 | CD59   | 43   | 1000  | K.TAVN#CSSDFDA CLITK.A  |
| P15260 | IFNGR1 | 179  | 1000  | R.MN#GSEIQYK.I          |
| P16144 | ITGB4  | 695  | 1000  | R.CSFRDEDDCTYSYTMEGI    |
| P16422 | EPCAM  | 111  | 53.71 | K.QCN#GTSMCWCVNTAGVFR   |
| P17181 | IFNAR1 | 172  | 1000  | K.N#SSGVEER.I           |
| P17301 | ITGA2  | 343  | 1000  | R.YFFN#VSDEA ALLEK.A    |
| P17301 | ITGA2  | 1074 | 1000  | K.GEYFVN#VTTR.I         |
| P19256 | CD58   | 169  | 1000  | R.N#STSIYFK.M           |
| P20645 | M6PR   | 57   | 1000  | K.RLKPLFN#K.S           |
| P20645 | M6PR   | 83   | 43.60 | R.EAGN#HTSGAGLVQINK.S   |
| P21589 | NT5E   | 333  | 1000  | K.LDN#YSTQELGK.T        |
| P21860 | ERBB3  | 437  | 48.87 | K.NLN#VTSLGFR.S         |
| P21860 | ERBB3  | 522  | 1000  | K.VCDPLCSSGGCWGPGPGQC   |
| P21926 | CD9    | 151  | 1000  | K.AIHVALN#CCGLAGGVEQF   |
| P22223 | CDH3   | 566  | 1000  | R.QVLN#ITDK.D           |
| P22413 | ENPP1  | 285  | 1000  | K.M*N#ASFSLK.S          |
| P22413 | ENPP1  | 341  | 1000  | K.MYN#GSVPFEER.I        |
| P22413 | ENPP1  | 477  | 16.27 | R.N#LSCREPNQHFKPYLK.H   |
| P25445 | FAS    | 118  | 1000  | R.LCDEGHGLEVEIN#CTR.T   |
| P25445 | FAS    | 136  | 20.63 | R.CKPNFFCN#STVCEHCDPC   |
| P26006 | ITGA3  | 107  | 1000  | R.MN#ITVK.N             |
| P26006 | ITGA3  | 265  | 1000  | K.N#ITIVTGAPR.H         |
| P26006 | ITGA3  | 511  | 1000  | R.RN#ITLAYTLEADRDR.R    |
| P26006 | ITGA3  | 656  | 24.24 | K.LLLSIN#VTNTR.T        |
| P26006 | ITGA3  | 969  | 37.54 | R.TSIPTINMEN#K.T        |
| P26012 | ITGB8  | 466  | 50.81 | R.N#CSCQCEDNRGPK.G      |

|        |          |      |        |                         |
|--------|----------|------|--------|-------------------------|
| P29323 | EPHB2    | 482  | 1000   | K.ELSEYN#ATAIK.S        |
| P30464 | HLA-B    | 110  | 1000   | R.GYYN#QSEAGSHTLQR.M    |
| P30825 | SLC7A1   | 226  | 142.63 | K.NWQLTEEDFGN#TSGR.L    |
| P30825 | SLC7A1   | 235  | 24.44  | R.LCLNN#DTK.E           |
| P30988 | CALCR    | 91   | 1000   | R.MQQLPAYQGEGPYCN#R.T   |
| P32004 | L1CAM    | 294  | 20.17  | R.VTYQNHN#K.T           |
| P32004 | L1CAM    | 671  | 1000   | K.VPGN#QTSTTLK.L        |
| P32004 | L1CAM    | 849  | 1000   | R.GYN#VTYWR.E           |
| P35052 | GPC1     | 116  | 1000   | R.SFDDHFQHLLN#DSER.T    |
| P35613 | BSG      | 160  | 1000   | K.ILLTCSLN#DSATEVTGHR.' |
| P35613 | BSG      | 268  | 1000   | K.ALM*N#GSESR.F         |
| P35613 | BSG      | 302  | 1000   | R.CN#GTSSK.G            |
| P40189 | IL6ST    | 83   | 1000   | K.EQYTIIN#R.T           |
| P40189 | IL6ST    | 131  | 71.75  | K.N#LSCIVNEGK.K         |
| P42892 | ECE1     | 166  | 1000   | K.HLLEN#STASVSEAERK.A   |
| P42892 | ECE1     | 187  | 1000   | R.ACM*N#ETRIEELR.A      |
| P42892 | ECE1     | 210  | 1000   | R.LGGWN#ITGPWAK.D       |
| P42892 | ECE1     | 270  | 1000   | R.DYYLN#K.T             |
| P42892 | ECE1     | 539  | 1000   | R.FFN#FSWR.V            |
| P42892 | ECE1     | 632  | 1000   | K.N#SSVEAFKR.Q          |
| P42892 | ECE1     | 651  | 40.36  | K.RQTECMVEQYSN#YSVNGI   |
| P48960 | CD97     | 371  | 1000   | R.GDKN#VTMGQSSAR.M      |
| P50454 | SERPINH1 | 120  | 1000   | R.SLSN#STAR.N           |
| P50895 | BCAM     | 439  | 1000   | R.TQN#FTLLVQGSPELK.T    |
| P51795 | CLCN5    | 408  | 33.66  | K.LCDYENRFN#TSK.G       |
| P51805 | PLXNA3   | 59   | 1000   | K.LAPN#LTELR.A          |
| P52569 | SLC7A2   | 227  | 1000   | K.N#ISASAR.E            |
| P52797 | EFNA3    | 100  | 1000   | R.TCN#ASQGFKR.W         |
| P53801 | PTTG1IP  | 54   | 78.16  | K.N#VSCLWCNTNK.A        |
| P54709 | ATP1B3   | 124  | 1000   | K.FLKPYTLEEQKN#LTVCPDC  |
| P55268 | LAMB2    | 1249 | 1000   | R.N#TSAASTAQLVEATEELRI  |
| P55268 | LAMB2    | 1348 | 119.27 | R.RAN#TSALAVPSPVSNAS/   |
| P56749 | CLDN12   | 47   | 1000   | K.N#LTVYTGLWVK.C        |
| P78504 | JAG1     | 217  | 20.17  | R.DDFFGHYACDQNGN#K.T    |
| P78536 | ADAM17   | 452  | 1000   | K.MFSN#CSK.Q            |
| P78536 | ADAM17   | 539  | 1000   | K.KCQEAIN#ATCK.G        |
| P78552 | IL13RA1  | 157  | 13.38  | R.NTSPDTN#YTLYYWHR.S    |
| P98160 | HSPG2    | 89   | 1000   | R.ALVN#FTR.S            |
| Q02487 | DSC2     | 392  | 1000   | R.AN#YTILK.G            |
| Q02487 | DSC2     | 629  | 1000   | K.AIN#DTAAR.L           |
| Q03405 | PLAUR    | 194  | 1000   | K.CCN#TTK.C             |
| Q07954 | LRP1     | 2521 | 1000   | R.AVN#SSCR.A            |
| Q07954 | LRP1     | 4364 | 1000   | K.QSGDVTCN#CTDGR.V      |

|          |          |      |        |                         |
|----------|----------|------|--------|-------------------------|
| Q08174   | PCDH1    | 305  | 26.89  | K.AN#DSDQGANAEIEYTFHQ   |
| Q08334   | IL10RB   | 49   | 1000   | K.GN#LTFTAQYLSYR.I      |
| Q08334   | IL10RB   | 161  | 1000   | K.N#GTDEK.F             |
| Q08722   | CD47     | 73   | 1000   | K.GRDIYTFDGALN#K.S      |
| Q08722   | CD47     | 111  | 1000   | K.MDKSDAVSHTGN#YTCEV'   |
| Q12913   | PTPRJ    | 525  | 1000   | K.GPN#GTEGASR.T         |
| Q13308   | PTK7     | 283  | 1000   | R.ATVFAN#GSLLLQVRPR.N   |
| Q13308   | PTK7     | 405  | 1000   | R.RQDVN#ITVATVPSWLK.K   |
| Q13332   | PTPRS    | 733  | 1000   | R.KVEAEALN#ATAIR.V      |
| Q13433   | SLC39A6  | 67   | 17.01  | R.YGEN#NSLSVEGFRK.L     |
| Q13433   | SLC39A6  | 241  | 1000   | K.TN#ESVSEPR.K          |
| Q13444   | ADAM15   | 237  | 1000   | K.YRDFQHLLN#R.T         |
| Q13641   | TPBG     | 81   | 1000   | R.N#LTEVPTDLPAYVR.N     |
| Q13641   | TPBG     | 256  | 132.25 | R.N#LTHLESLHLEDNALK.V   |
| Q13641   | TPBG     | 275  | 1000   | K.VLHN#GTLAELQGLPHIR.V  |
| Q13740   | ALCAM    | 167  | 1000   | K.KLGDCISEDSYPDGN#ITW'  |
| Q13740   | ALCAM    | 265  | 1000   | K.EGDN#ITLK.C           |
| Q13740   | ALCAM    | 306  | 1000   | R.RN#ATGDYK.C           |
| Q13740   | ALCAM    | 361  | 1000   | R.N#ATVVWM*K.D          |
| Q13740   | ALCAM    | 480  | 94.95  | K.IISPEEN#VTLTCTAENQLE  |
| Q13740-2 | ALCAM    | 499  | 59.30  | R.TVNSLN#VSANENR.E      |
| Q13813   | SPTAN1   | 1356 | 1000   | R.FLSDFRDLM*SWIN#GIR.G  |
| Q14126   | DSG2     | 112  | 1000   | K.DTGELN#VTSILDREETPFFI |
| Q14126   | DSG2     | 182  | 84.61  | K.IN#ATDADEPNTLNSK.I    |
| Q14126   | DSG2     | 462  | 1000   | R.YVQN#GTYTVK.I         |
| Q14542   | SLC29A2  | 48   | 1000   | R.LAGAGN#STAR.I         |
| Q14956   | GPNMB    | 249  | 16.06  | K.NDRN#SSDETFLK.D       |
| Q15043   | SLC39A14 | 77   | 1000   | R.GN#VTQHVQGHR.N        |
| Q15223   | PVRL1    | 72   | 1000   | K.STN#GSK.Q             |
| Q15223   | PVRL1    | 202  | 30.84  | R.NPN#GTVTVISR.Y        |
| Q15223   | PVRL1    | 297  | 1000   | K.GVEAQN#R.T            |
| Q15262   | PTPRK    | 416  | 1000   | R.IAVDWESLGYN#ITR.C     |
| Q15303   | ERBB4    | 358  | 1000   | K.FIN#CTK.I             |
| Q15303   | ERBB4    | 576  | 1000   | K.MEDGLLTCHGPGPDN#CTK   |
| Q15758   | SLC1A5   | 212  | 1000   | R.SYSTTYEERN#ITGTR.V    |
| Q15904   | ATP6AP1  | 261  | 1000   | K.QPVSPVIHPPVSYN#DTAPR  |
| Q16563   | SYPL1    | 71   | 27.12  | K.GQTEIQVNCPPAVTEN#K.T  |
| Q29983   | MICA     | 79   | 1000   | R.AKPQQQWAEDVLGN#KTW    |
| Q29983   | MICA     | 125  | 1000   | R.VCEIHEDN#STR.S        |
| Q29983   | MICA     | 210  | 1000   | R.TVPPMVN#VTR.S         |
| Q29983   | MICA     | 220  | 1000   | R.SEASEGN#ITVTCR.A      |
| Q3MIR4   | TMEM30B  | 241  | 13.38  | R.RPVYELSPDPN#NTGFINQC  |
| Q3ZCQ3   | FAM174B  | 53   | 1000   | R.ESRPPPGPGPN#TTR.F     |

|        |          |       |        |                         |
|--------|----------|-------|--------|-------------------------|
| Q4KMQ2 | ANO6     | 493   | 30.84  | K.NIN#GTDPIQK.Y         |
| Q4KMQ2 | ANO6     | 802   | 22.53  | K.GNPYSDLGN#HTTCR.Y     |
| Q58DX5 | NAALADL2 | 295   | 37.54  | K.N#VTNQIALLK.L         |
| Q58DX5 | NAALADL2 | 556   | 48.87  | K.NNFN#CTR.R            |
| Q58EX2 | SDK2     | 577   | 1000   | R.VISAGGN#DSR.S         |
| Q58EX2 | SDK2     | 936   | 33.66  | R.ISWEEYN#RTNTR.V       |
| Q5MY95 | ENTPD8   | 135   | 1000   | R.KN#SSQAR.D            |
| Q5VU97 | CACHD1   | 329   | 24.44  | R.STNN#NTK.F            |
| Q5ZPR3 | CD276    | 91    | 1000   | K.QLVHSFAEGQDQGSAYAN    |
| Q5ZPR3 | CD276    | 104   | 1000   | R.TALFPDLLAQGN#ASLR.L   |
| Q5ZPR3 | CD276    | 215   | 1000   | R.VVLGAN#GTYSCLVR.N     |
| Q5ZPR3 | CD276    | 309   | 1000   | R.DQGSAYAN#R.T          |
| Q658P3 | STEAP3   | 344   | 1000   | K.QVLAN#K.S             |
| Q6EMK4 | VASN     | 117   | 1000   | R.LHEITN#ETFR.G         |
| Q6H3X3 | RAET1G   | 82    | 1000   | K.KLN#VTTAWK.A          |
| Q6P4Q7 | CNNM4    | 85    | 15.01  | R.LYGYSLGN#ISSNLISFTEVI |
| Q6P4Q7 | CNNM4    | 127   | 1000   | R.GN#TSGVLVVLTK.F       |
| Q6UXI9 | NPNT     | 273   | 1000   | K.GN#GTILK.G            |
| Q6YHK3 | CD109    | 118   | 1000   | R.TQDEILFSN#STR.L       |
| Q6YHK3 | CD109    | 419   | 1000   | K.IN#YTVPQSGTFK.I       |
| Q6ZMP0 | THSD4    | 709   | 1000   | R.QVYAN#R.S             |
| Q7Z5N4 | SDK1     | 1767  | 1000   | K.N#LTSHTK.Y            |
| Q86SQ4 | GPR126   | 143   | 1000   | K.GFN#ASYIR.V           |
| Q8IWA5 | SLC44A2  | 417   | 84.61  | K.TCNPETFPSSN#ESR.Q     |
| Q8IWT6 | LRRRC8A  | 66    | 1000   | K.DSCN#DSFR.G           |
| Q8IWU5 | SULF2    | 132   | 1000   | R.TFAVYLN#STGYR.T       |
| Q8IWU5 | SULF2    | 171   | 1000   | R.FYN#YTLCR.N           |
| Q8N0Z9 | VSIG10   | 347   | 1000   | R.N#LTQPEVIIQPSSR.H     |
| Q8N271 | PROM2    | 725   | 1000   | R.N#VSECFLAR.E          |
| Q8N6C5 | IGSF1    | 607   | 1000   | K.N#LTLWCR.S            |
| Q8N8Z6 | DCBLD1   | 64    | 23.35  | K.NYPGTYPN#HTVCEK.T     |
| Q8NC42 | RNF149   | 131   | 100.02 | R.RN#ASAVVLYNEER.Y      |
| Q8NE01 | CNNM3    | 73    | 1000   | R.LFGPGFAN#SSWSWVAPEG   |
| Q8NFZ8 | CADM4    | 67    | 1000   | R.QTLFFN#GTR.A          |
| Q8TAB3 | PCDH19   | 546   | 1000   | K.DGGLPSLQSN#ATVR.V     |
| Q8WWI5 | SLC44A1  | 180   | 1000   | R.CAPVN#ISCYAK.F        |
| Q8WWY8 | LIPH     | 357   | 1000   | K.AGN#TTESK.I           |
| Q8WXI7 | MUC16    | 12416 | 1000   | R.KFN#TTER.V            |
| Q92508 | PIEZO1   | 2294  | 1000   | R.ELYN#GTADITLR.F       |
| Q92508 | PIEZO1   | 2331  | 1000   | K.HMLALAPN#STAR.R       |
| Q92542 | NCSTN    | 387   | 1000   | R.TSLELWM*HTDPVSQKN#E   |
| Q92542 | NCSTN    | 417   | 1000   | R.RPN#QSQPLPSSLQR.F     |
| Q92542 | NCSTN    | 612   | 1000   | K.DLYEYSWVQGPLHSN#ETI   |

|        |          |      |       |                         |
|--------|----------|------|-------|-------------------------|
| Q92823 | NRCAM    | 223  | 1000  | R.FN#HTQTIQQK.Q         |
| Q92823 | NRCAM    | 276  | 45.03 | R.ERPPTFLTPEGN#ASNK.E   |
| Q92823 | NRCAM    | 858  | 28.93 | R.VNVVN#STLAEVHWDVPVI   |
| Q92854 | SEMA4D   | 379  | 33.66 | R.AAN#YTSSLNLPDK.T      |
| Q96HA4 | C1orf159 | 128  | 1000  | R.SFAGPGAPFPMN#R.S      |
| Q96K49 | TMEM87B  | 68   | 1000  | K.TMFN#STDIK.L          |
| Q96NT5 | SLC46A1  | 58   | 1000  | R.FSADLGYN#GTR.Q        |
| Q96QE2 | SLC2A13  | 433  | 1000  | R.ITFKPIAPSGQN#ATCTR.Y  |
| Q96RD7 | PANX1    | 255  | 1000  | K.SGILRN#DSTVPDQFQCK.L  |
| Q99523 | SORT1    | 162  | 24.44 | K.DITDLIN#NTFIR.T       |
| Q99571 | P2RX4    | 75   | 1000  | K.GVAVTN#TSK.L          |
| Q9BRN9 | TM2D3    | 157  | 1000  | R.QRYPAN#CTVR.D         |
| Q9BTN0 | LRFN3    | 339  | 1000  | R.LLGN#SSR.A            |
| Q9C0C4 | SEMA4C   | 106  | 24.44 | K.NN#QTECFNFIR.F        |
| Q9C0C4 | SEMA4C   | 121  | 1000  | R.FLQPYN#ASHLYVCGTYAF   |
| Q9H0U3 | MAGT1    | 71   | 1000  | K.APPRN#YSVIVMFTALQLHI  |
| Q9H0X4 | ITFG3    | 314  | 1000  | K.SDPHWESMLN#ATTR.R     |
| Q9H0X4 | ITFG3    | 389  | 1000  | R.YKPDTLAVAVEN#GTGTDFI  |
| Q9H2X9 | SLC12A5  | 333  | 1000  | K.LAWEGN#ETVTTR.L       |
| Q9H6X2 | ANTXR1   | 184  | 1000  | K.DFN#ETQLAR.I          |
| Q9H8M5 | CNNM2    | 112  | 24.44 | R.VYGQNNIN#ETWSR.I      |
| Q9HC56 | PCDH9    | 450  | 1000  | K.IVASDSGKPSLN#QTALVR.  |
| Q9HC58 | SLC24A3  | 86   | 31.60 | K.N#CTEPALHEFPNDIFTNED  |
| Q9HCN3 | TMEM8A   | 535  | 1000  | R.GWSC TDN#STAQTVAQQR.  |
| Q9HCU4 | CELSR2   | 1076 | 71.07 | R.GNELSLVLLN#ASTGELK.L  |
| Q9HCU4 | CELSR2   | 1501 | 1000  | R.FGSVLGN#YSCAAQGTQGC   |
| Q9HCU4 | CELSR2   | 1741 | 1000  | R.LHGLHLSN#ITVGGIPGPAG  |
| Q9HCU4 | CELSR2   | 1900 | 1000  | K.GFDPDCN#K.T           |
| Q9HCU4 | CELSR2   | 2043 | 1000  | R.N#ESGLDSGR.S          |
| Q9HCU4 | CELSR2   | 2061 | 1000  | R.N#ATQHTAGYFGSDVK.V    |
| Q9HDC9 | APMAP    | 160  | 1000  | R.AGPN#GTLFVADAYK.G     |
| Q9NPH3 | IL1RAP   | 118  | 1000  | R.N#TTYCSK.V            |
| Q9NV96 | TMEM30A  | 107  | 1000  | K.CLSPDVTPCFCTIN#FTLEK. |
| Q9NYQ6 | CELSR1   | 1576 | 1000  | K.DIGN#YSCAAQGTQTGSKK   |
| Q9NYQ6 | CELSR1   | 2122 | 1000  | K.LSRN#ETQVDGAR.A       |
| Q9NZU0 | FLRT3    | 226  | 24.24 | K.VFFNLVN#LTEL SLVR.N   |
| Q9P055 | JKAMP    | 37   | 1000  | K.N#GSTEIYGECGVCPR.G    |
| Q9P2B2 | PTGFRN   | 286  | 1000  | K.N#VSVAEGK.E           |
| Q9P2B2 | PTGFRN   | 300  | 1000  | K.ELDLTCN#ITTD RADDVRPI |
| Q9P2B2 | PTGFRN   | 600  | 1000  | R.YSVLIMAEKPVGDLSSPN#I  |
| Q9UGT4 | SUSD2    | 162  | 1000  | K.SELVN#ETR.W           |
| Q9UHG3 | PCYOX1   | 323  | 46.82 | R.KMSN#ITFLNFDPIIEFHQ'  |
| Q9UHN6 | TMEM2    | 739  | 1000  | K.TTN#SSAADPR.E         |

|        |          |      |       |                       |
|--------|----------|------|-------|-----------------------|
| Q9UHN6 | TMEM2    | 1092 | 1000  | R.QN#GSLSK.I          |
| Q9UIG8 | SLCO3A1  | 153  | 1000  | R.WGAEGRDVCAAN#GSGGE  |
| Q9UIW2 | PLXNA1   | 1043 | 1000  | K.YN#YTEDPTILR.I      |
| Q9ULF5 | SLC39A10 | 339  | 58.70 | K.DLNEDDHHHECLN#VTQLI |
| Q9UM47 | NOTCH3   | 1179 | 1000  | R.CLHN#GTCVDLVGGFR.C  |
| Q9UN76 | SLC6A14  | 155  | 1000  | K.N#CSSWSDK.N         |
| Q9UN76 | SLC6A14  | 174  | 30.61 | R.SPIVTHCN#VSTVKN.G   |
| Q9UN76 | SLC6A14  | 189  | 1000  | K.GIQEIIQM*N#K.S      |
| Q9UP38 | FZD1     | 231  | 1000  | K.FPVHGAGELCVGQN#TSDK |
| Q9Y4D7 | PLXND1   | 155  | 1000  | R.RGN#ISAVAVR.F       |
| Q9Y4D7 | PLXND1   | 500  | 30.84 | K.INLN#ESMQVVS.R      |
| Q9Y4D7 | PLXND1   | 696  | 1000  | K.AN#FTIYDCSR.T       |
| Q9Y4L1 | HYOU1    | 869  | 1000  | K.N#ATLAEQAK.L        |
| Q9Y4L1 | HYOU1    | 931  | 1000  | R.AEPPLN#ASASDQGEK.V  |
| Q9Y5Y6 | ST14     | 485  | 1000  | R.CDGWADCTDHSDELN#CSG |
| Q9Y639 | NPTN     | 197  | 73.31 | K.N#ASNMEYR.I         |
| Q9Y639 | NPTN     | 229  | 1000  | K.AN#ATIEVK.A         |
| Q9Y653 | GPR56    | 303  | 1000  | K.N#SSQVLGEK.V        |
| Q9Y6M7 | SLC4A7   | 786  | 49.59 | K.DN#ITAHNISWR.N      |
| Q9Y6M7 | SLC4A7   | 796  | 1000  | R.N#LTVSECK.K         |

## on Sites in Expt# 2

| Half-Life (h) | PPM   | XCorr | Domain Name          | Domain Range |
|---------------|-------|-------|----------------------|--------------|
| 150.64        | 2.24  | 4.228 |                      |              |
| 15.81         | 2.09  | 2.133 |                      |              |
| 21.36         | 0.66  | 3.521 | Peptidase M12B       | 220-456      |
| 6.38          | -0.14 | 1.967 | CUB 2                | 147-265      |
| 4.65          | 0.03  | 2.136 | F5/8 type C2         | 431-583      |
| 19.55         | -0.1  | 2.429 | Sema                 | 20-466       |
| 105.03        | -0.17 | 2.105 |                      |              |
| 12.57         | -1.12 | 5.692 |                      |              |
| 9.19          | 0.81  | 3.719 | IPT/TIG 3            | 983-1092     |
| 10.45         | -0.81 | 2.632 |                      |              |
| 32.23         | 0.97  | 3.856 |                      |              |
| 17.94         | -0.53 | 4.797 | Laminin G-like 2     | 2941-3115    |
| >200          | -0.54 | 4.045 | Ig-like C2-type 3    | 208-297      |
| >200          | -1.05 | 2.86  | Ig-like C2-type 5    | 401-491      |
| 113.18        | 0.42  | 5.265 | Fibronectin type-III | 1498-591     |
| 13.34         | -1.12 | 1.828 | IPT/TIG 3            | 1252-1375    |
| 48.15         | 1.16  | 2.566 |                      |              |
| 12.45         | -0.15 | 4.38  | Ig-like V-type       | 27-141       |
| 11.02         | -0.15 | 1.809 |                      |              |
| >200          | -0.06 | 2.238 |                      |              |
| 17.05         | -1.2  | 3.09  |                      |              |
| >200          | 4.03  | 3.094 | Ig-like C2-type 1    | 20-138       |
| 15.32         | 2.53  | 1.919 | Ig-like C2-type 7    | 813-945      |
| 9.91          | 0.21  | 3.477 | Ig-like C2-type 7    | 813-945      |
| 12.51         | -0.11 | 2.19  | Ig-like C2-type 6    | 949-1097     |
| >200          | -0.17 | 3.34  | Ig-like V-type       | 19-129       |
| 16.37         | 0.57  | 1.861 | Ig-like V-type       | 19-129       |
| 51.73         | -3.08 | 1.831 | Laminin EGF-like 1   | 1063-1108    |
| 23.66         | -0.21 | 2.189 |                      |              |
| 35.77         | 0.01  | 4.61  |                      |              |
| 17.00         | -0.97 | 1.9   |                      |              |
| 29.24         | -2    | 3.323 |                      |              |
| 19.88         | -0.3  | 2.145 |                      |              |
| 5.91          | -0.37 | 2.029 | UPAR/Ly6 1           | 33-126       |
| 4.33          | -0.18 | 3.164 | UPAR/Ly6 2           | 140-222      |
| 5.23          | 0.37  | 2.187 |                      |              |
| 5.92          | -0.48 | 3.12  | Ig-like V-type       | 36-146       |
| 9.53          | -0.1  | 3.365 |                      |              |
| 7.97          | -0.02 | 2.855 |                      |              |
| 18.24         | -0.34 | 2.732 |                      |              |

|        |       |       |                      |            |
|--------|-------|-------|----------------------|------------|
| 17.23  | 1.09  | 1.579 | PA                   | 223-313    |
| 14.90  | 0.12  | 2.877 |                      |            |
| 13.87  | 0.83  | 3.097 |                      |            |
| >200   | 0.87  | 2.754 |                      |            |
| >200   | -1.12 | 2.502 |                      |            |
| >200   | -0.07 | 5.521 |                      |            |
| 18.50  | -0.35 | 3.333 |                      |            |
| 11.00  | -1.81 | 1.941 |                      |            |
| 19.59  | 0.95  | 2.677 | Ig-like C2-type 2    | 128-193    |
| 40.90  | 0.06  | 1.948 | Ig-like C2-type 3    | 230-297    |
| 24.46  | 0.32  | 4.176 | VWFA                 | 140-378    |
| 13.95  | -0.8  | 4.275 |                      |            |
| 27.76  | -0.66 | 5.059 |                      |            |
| 61.03  | -0.74 | 4.457 |                      |            |
| 23.14  | -0.02 | 3.314 | Fibronectin type-III | ε 853-947  |
| >200   | -0.56 | 2.229 |                      |            |
| 12.70  | -0.84 | 3.657 | Ig-like 1            | 35-144     |
| 17.72  | 0.15  | 2.587 | Ig-like 2            | 146-237    |
| 109.00 | 6.66  | 5.042 | Ig-like 3            | 238-322    |
| >200   | -0.45 | 3.451 | Ig-like 4            | 325-415    |
| 20.44  | -0.21 | 4.228 | Ig-like 6            | 502-593    |
| 22.65  | -0.65 | 2.48  | Ig-like 7            | 594-677    |
| 12.22  | -0.04 | 2.722 |                      |            |
| 10.62  | -0.26 | 1.986 |                      |            |
| 27.08  | -0.53 | 2.844 |                      |            |
| 14.20  | -0.09 | 6.303 |                      |            |
| >200   | -0.34 | 7.519 |                      |            |
| 16.28  | 0.07  | 2.978 | Fibronectin type-III | ε 834-927  |
| 18.62  | 5.67  | 2.218 | Fibronectin type-III | ε 834-927  |
| >200   | 1.58  | 3.989 | Sushi 1              | 35-96      |
| 25.52  | 0.72  | 2.667 |                      |            |
| 23.37  | -0.58 | 6.423 |                      |            |
| 24.58  | -0.16 | 3.58  |                      |            |
| 90.72  | -0.49 | 2.121 |                      |            |
| 45.48  | 1.5   | 3.705 |                      |            |
| 15.40  | -0.19 | 4.523 |                      |            |
| 22.42  | 0.77  | 2.817 |                      |            |
| 51.83  | 0.05  | 3.396 |                      |            |
| 30.27  | 0.02  | 2.909 | Thyroglobulin type-1 | 70-145     |
| 16.59  | -0.07 | 2.56  |                      |            |
| 5.90   | 0.09  | 2.805 |                      |            |
| 5.55   | -0.09 | 2.167 | Fibronectin type-III | γ 918-1010 |
| 11.79  | -0.85 | 2.716 |                      |            |

|       |       |       |                      |            |
|-------|-------|-------|----------------------|------------|
| 9.72  | -1.05 | 2.972 | Laminin EGF-like     | 11983-1030 |
| 5.85  | -0.25 | 3.101 |                      |            |
| 9.04  | 0.22  | 3.782 |                      |            |
| 3.56  | -0.41 | 2.348 |                      |            |
| 14.86 | -1.76 | 3.698 |                      |            |
| >200  | -0.4  | 3.097 |                      |            |
| >200  | 0.16  | 4.093 |                      |            |
| 34.41 | -0.36 | 2.096 |                      |            |
| 20.16 | -0.76 | 5.366 |                      |            |
| 13.40 | -1.19 | 1.675 |                      |            |
| >200  | -2.07 | 6.046 |                      |            |
| >200  | -0.7  | 3.408 |                      |            |
| >200  | -1.58 | 2.248 |                      |            |
| >200  | -0.54 | 2.116 |                      |            |
| >200  | -0.51 | 3.498 |                      |            |
| 18.91 | -0.85 | 2.754 |                      |            |
| >200  | -0.26 | 2.193 |                      |            |
| 15.28 | -0.22 | 1.708 | UPAR/Ly6             | 26-108     |
| 3.35  | -0.79 | 2.076 |                      |            |
| 21.76 | -1.87 | 4.917 |                      |            |
| 12.51 | -0.72 | 2.28  | Thyroglobulin type-1 | 63-135     |
| 10.00 | -1.82 | 2.678 | Fibronectin type-III | 127-227    |
| 18.43 | 7.46  | 3.52  | VWFA                 | 188-365    |
| 28.37 | 0.48  | 1.877 |                      |            |
| 15.96 | -0.33 | 3.268 |                      |            |
| >200  | -0.8  | 3.755 |                      |            |
| 57.97 | -0.19 | 2.446 |                      |            |
| 21.86 | -0.32 | 2.072 |                      |            |
| 7.27  | -0.69 | 4.152 |                      |            |
| 4.49  | 0.31  | 2.035 |                      |            |
| 61.73 | -0.55 | 4.689 |                      |            |
| 3.02  | 3.485 | 3.474 | Cadherin 5           | 547-650    |
| 20.08 | -0.26 | 2.144 |                      |            |
| 48.31 | -0.07 | 2.779 |                      |            |
| 17.59 | -0.78 | 3.752 |                      |            |
| >200  | -1.03 | 2.958 |                      |            |
| 32.61 | 0.47  | 4.059 |                      |            |
| 73.02 | -0.75 | 2.163 |                      |            |
| 41.69 | 0.15  | 3.587 |                      |            |
| 84.31 | -2.66 | 4.433 |                      |            |
| 17.09 | -0.28 | 2.644 |                      |            |
| 27.48 | -0.07 | 2.925 |                      |            |
| 7.12  | -0.37 | 2.167 |                      |            |

|        |       |       |                      |           |
|--------|-------|-------|----------------------|-----------|
| 19.04  | 0.47  | 3.095 | Fibronectin type-III | 2435-530  |
| 7.42   | -0.14 | 4.056 |                      |           |
| 14.73  | 0.36  | 3.668 |                      |           |
| 11.28  | -0.39 | 3.039 |                      |           |
| >200   | 0.15  | 2.381 |                      |           |
| 12.31  | -0.12 | 1.585 | Ig-like C2-type 3    | 240-328   |
| 15.57  | -0.35 | 2.732 | Fibronectin type-III | 1615-712  |
| 18.18  | -0.82 | 3.305 | Fibronectin type-III | 2814-916  |
| 32.71  | 0.3   | 4.996 |                      |           |
| >200   | -0.88 | 4.628 | Ig-like C2-type      | 138-219   |
| 12.42  | -0.32 | 2.171 | Ig-like V-type       | 221-315   |
| 13.43  | -0.34 | 2.442 | Ig-like V-type       | 221-315   |
| 21.83  | -0.66 | 1.621 | Ig-like C2-type      | 26-120    |
| 7.66   | -0.65 | 2.297 | Fibronectin type-III | 1125-216  |
| 23.77  | -0.62 | 4.354 |                      |           |
| 29.61  | -0.34 | 1.951 |                      |           |
| 17.20  | -1.71 | 2.138 |                      |           |
| 17.26  | -0.96 | 1.801 |                      |           |
| 12.62  | 3.609 | 3.602 |                      |           |
| 7.67   | -0.5  | 2.522 |                      |           |
| 107.97 | -0.44 | 5.96  |                      |           |
| 9.91   | 0.1   | 3.164 |                      |           |
| 17.86  | -0.55 | 2.543 |                      |           |
| 6.66   | -3.66 | 3.387 | Ig-like C2-type 2    | 363-411   |
| 48.00  | 0.37  | 3.035 |                      |           |
| >200   | 0.22  | 3.865 | Sema                 | 20-488    |
| 5.50   | -4.29 | 2.773 |                      |           |
| 10.82  | -0.83 | 2.494 | Ephrin RBD           | 30-169    |
| 16.31  | -0.16 | 2.895 | PSI                  | 39-92     |
| 107.61 | -8.85 | 4.664 |                      |           |
| 17.19  | 1.35  | 5.342 |                      |           |
| >200   | -0.3  | 4.117 |                      |           |
| 13.72  | 4.88  | 3.425 |                      |           |
| 5.59   | -0.69 | 2.927 | DSL                  | 185-229   |
| 19.94  | -0.36 | 2.353 | Peptidase M12B       | 223-474   |
| >200   | -0.9  | 3.356 | Disintegrin          | 475-563   |
| 62.41  | -1.57 | 1.901 | Fibronectin type-III | 2128-226  |
| >200   | -0.18 | 2.385 | SEA                  | 80-191    |
| 13.78  | -0.8  | 2.656 | Cadherin 3           | 356-471   |
| 23.57  | -0.97 | 2.678 | Cadherin 5           | 580-694   |
| 17.75  | -0.62 | 2.034 | UPAR/Ly6 2           | 115-213   |
| 24.33  | -0.28 | 2.303 |                      |           |
| 7.49   | -1.27 | 3.954 | EGF-like 21          | 4340-4375 |

|        |       |       |                      |         |
|--------|-------|-------|----------------------|---------|
| 30.30  | 0.88  | 2.389 | Cadherin 3           | 281-387 |
| 6.38   | 0.15  | 3.536 | Fibronectin type-III | 123-111 |
| 4.97   | -0.69 | 1.967 | Fibronectin type-III | 114-216 |
| 16.06  | 0.1   | 5.377 | Ig-like V-type       | 19-127  |
| >200   | -0.08 | 5.145 | Ig-like V-type       | 19-127  |
| 17.63  | 0.11  | 3.683 | Fibronectin type-III | 457-541 |
| 27.53  | -4.77 | 3.108 | Ig-like C2-type 3    | 225-317 |
| 17.89  | -0.63 | 4.174 | Ig-like C2-type 4    | 309-407 |
| 15.91  | -0.91 | 2.837 | Fibronectin type-III | 723-831 |
| 8.91   | 3.09  | 5.437 |                      |         |
| 6.76   | -2.31 | 3.049 |                      |         |
| 40.29  | 0.02  | 4.288 | Peptidase M12B       | 213-414 |
| 11.41  | -0.27 | 3.618 | LRRNT                | 53-91   |
| 12.47  | 0.19  | 5.172 |                      |         |
| 22.78  | -0.17 | 3.887 |                      |         |
| 105.22 | 0.12  | 2.055 | Ig-like V-type 2     | 125-234 |
| 108.28 | 0.16  | 2.148 | Ig-like C2-type 1    | 245-328 |
| 10.04  | 0.05  | 1.607 | Ig-like C2-type 1    | 245-328 |
| 29.18  | 2.11  | 1.867 | Ig-like C2-type 2    | 333-409 |
| 77.68  | -0.94 | 5.03  | Ig-like C2-type 3    | 416-501 |
| 20.86  | -0.98 | 4.077 | Ig-like C2-type 3    | 416-501 |
| 42.04  | 2.16  | 2.763 |                      |         |
| 3.80   | 0.12  | 5.433 | Cadherin 1           | 50-160  |
| 9.70   | -0.23 | 2.946 | Cadherin 2           | 161-273 |
| 10.47  | -0.3  | 3.929 | Cadherin 4           | 389-503 |
| 23.13  | 0.04  | 1.84  |                      |         |
| >200   | -0.85 | 2.389 | PKD                  | 240-327 |
| >200   | -0.67 | 4.433 |                      |         |
| 15.41  | -0.29 | 2.354 | Ig-like V-type       | 31-141  |
| >200   | -0.14 | 2.683 | Ig-like C2-type 1    | 149-238 |
| 19.83  | -0.98 | 3.512 | Ig-like C2-type 2    | 247-334 |
| 11.04  | 2.66  | 4.812 | Fibronectin type-III | 392-488 |
| 6.71   | -0.56 | 2.124 |                      |         |
| 15.18  | -0.09 | 3.518 |                      |         |
| 17.25  | -0.59 | 3.626 |                      |         |
| 63.40  | -1.36 | 3.81  |                      |         |
| >200   | -0.2  | 1.987 | MARVEL               | 28-237  |
| 19.64  | 0     | 3.535 |                      |         |
| 30.83  | -2.09 | 3.028 |                      |         |
| >200   | -0.53 | 2.894 | Ig-like C1-type      | 207-296 |
| 14.89  | -0.74 | 2.024 | Ig-like C2-type      | 207-296 |
| 51.64  | -3.98 | 4.302 |                      |         |
| 19.35  | -0.46 | 3.955 |                      |         |

|        |       |       |                      |             |
|--------|-------|-------|----------------------|-------------|
| 12.75  | -0.42 | 2.634 |                      |             |
| >200   | -0.34 | 1.875 |                      |             |
| 14.82  | -0.65 | 3.465 |                      |             |
| 15.40  | -5.46 | 2.439 |                      |             |
| 21.65  | 0.3   | 2.002 | Ig-like C2-type 6    | 496-585     |
| 27.74  | -0.31 | 3.067 | Fibronectin type-III | 897-991     |
| 58.53  | -0.61 | 2.653 |                      |             |
| 16.12  | -0.08 | 2.481 | VWFA                 | 228-443     |
| 21.31  | -1.14 | 1.834 | Ig-like V-type 1     | 29-139      |
| 17.61  | -1.85 | 3.1   | Ig-like V-type 1     | 29-139      |
| 41.31  | 1.72  | 3.252 | Ig-like C2-type 1    | 145-238     |
| 10.27  | 0.39  | 3.33  | Ig-like V-type 2     | 243-357     |
| 20.07  | -0.33 | 2.686 |                      |             |
| >200   | 0.17  | 2.882 |                      |             |
| 13.72  | -0.17 | 5.874 |                      |             |
| 31.05  | -0.9  | 4.354 |                      |             |
| 26.05  | 0.36  | 3.484 |                      |             |
| 9.83   | 0.32  | 1.725 |                      |             |
| 9.83   | -0.37 | 2.403 |                      |             |
| 8.33   | 0.1   | 2.546 |                      |             |
| 8.93   | 0.22  | 1.988 | TSP type-1 2         | 676-737     |
| 13.65  | -2.1  | 2.025 | Fibronectin type-III | 11704-1800  |
| 11.89  | -0.47 | 2.234 | CUB                  | 41-149      |
| 104.44 | -0.3  | 3.584 |                      |             |
| 15.53  | -0.27 | 2.483 |                      |             |
| 8.54   | 1.09  | 2.375 |                      |             |
| 4.91   | -0.35 | 3.039 |                      |             |
| 13.47  | -0.21 | 3.176 | Ig-like C2-type 4    | 311-404     |
| 23.39  | 2.45  | 2.633 |                      |             |
| 152.98 | 0.38  | 2.943 | Ig-like C2-type 6    | 589-677     |
| 11.42  | -0.13 | 2.997 | CUB                  | 41-150      |
| >200   | 0.02  | 3.69  | PA                   | 67-175      |
| 8.72   | -0.74 | 6.502 |                      |             |
| 23.78  | -0.37 | 3.429 | Ig-like V-type       | 21-119      |
| 9.30   | 0.23  | 1.735 | Cadherin 5           | 454-563     |
| >200   | 0.14  | 3.588 |                      |             |
| 12.79  | -0.65 | 2.717 |                      |             |
| 60.27  | -1.51 | 1.594 | SEA 3                | 12368-12504 |
| 30.51  | 0.09  | 3.505 |                      |             |
| 30.18  | -0.14 | 2.714 |                      |             |
| 58.48  | -0.58 | 5.186 |                      |             |
| 109.71 | -0.7  | 4.982 |                      |             |
| 22.01  | 1.09  | 5.311 |                      |             |

|        |       |       |                      |           |
|--------|-------|-------|----------------------|-----------|
| 36.87  | -0.58 | 2.626 | Ig-like 2            | 141-235   |
| 22.96  | -1.44 | 4.832 | Ig-like 3            | 267-356   |
| 20.04  | 0.3   | 4.39  | Fibronectin type-III | 848-950   |
| 8.24   | -0.18 | 2.974 | Sema                 | 22-500    |
| 29.05  | -0.4  | 4.732 |                      |           |
| >200   | 2.09  | 2.104 |                      |           |
| 24.60  | -0.66 | 4.023 |                      |           |
| >200   | -0.01 | 2.091 |                      |           |
| 13.86  | -0.22 | 3.087 |                      |           |
| 7.51   | -2.45 | 4.933 |                      |           |
| 28.87  | -0.48 | 2.328 |                      |           |
| >200   | -3.5  | 3.531 |                      |           |
| 76.67  | -0.61 | 1.936 | Ig-like              | 295-382   |
| 15.39  | 0.01  | 3.286 | Sema                 | 30-497    |
| 10.98  | 1.56  | 3.247 | Sema                 | 30-497    |
| 18.33  | 6.45  | 6.879 | Thioredoxin          | 47-175    |
| >200   | -0.01 | 3.344 |                      |           |
| 15.52  | -0.16 | 5.754 |                      |           |
| 71.29  | -0.99 | 2.338 |                      |           |
| 17.81  | -0.06 | 3.037 | VWFA                 | 44-215    |
| 13.74  | -0.45 | 3.844 |                      |           |
| 12.36  | -0.37 | 4.332 | Cadherin 4           | 365-469   |
| >200   | -0.97 | 4.103 |                      |           |
| 31.04  | -0.38 | 1.917 |                      |           |
| 6.83   | 8.03  | 2.38  | Cadherin 9           | 1028-1146 |
| 16.82  | 1.56  | 5.777 | Laminin G-like 1     | 1367-1571 |
| 54.83  | -1.13 | 5.644 | Laminin G-like 2     | 1614-1971 |
| 5.13   | -0.6  | 2.562 | EGF-like 7           | 1883-1922 |
| 9.09   | -0.17 | 3.331 |                      |           |
| 9.12   | -0.75 | 3.017 |                      |           |
| 14.24  | -0.01 | 2.477 |                      |           |
| 14.79  | -0.85 | 2.045 | Ig-like C2-type 1    | 21-128    |
| 13.11  | -3.07 | 1.824 |                      |           |
| 8.20   | -0.22 | 1.503 | Laminin G-like 1     | 1442-1646 |
| 20.32  | -0.56 | 3.212 |                      |           |
| 105.95 | -0.45 | 2.353 |                      |           |
| 7.65   | 1.28  | 2.133 |                      |           |
| 8.65   | -0.28 | 2.755 | Ig-like C2-type 3    | 276-394   |
| 9.41   | 0.13  | 4.718 | Ig-like C2-type 3    | 276-394   |
| 7.71   | 1.54  | 5.405 | Ig-like C2-type 5    | 544-662   |
| 165.19 | -0.19 | 2.927 |                      |           |
| 19.38  | 0.19  | 5.349 |                      |           |
| 15.34  | -0.37 | 3.214 |                      |           |

|        |       |       |                      |           |
|--------|-------|-------|----------------------|-----------|
| 9.06   | -0.63 | 1.506 |                      |           |
| 10.04  | -0.55 | 1.654 |                      |           |
| 7.12   | 0.67  | 2.542 | IPT/TIG 2            | 961-104   |
| 57.82  | -0.36 | 3.815 |                      |           |
| 7.18   | -0.46 | 5.553 | EGF-like 30          | 1160-1203 |
| 9.55   | 0.31  | 1.597 |                      |           |
| 29.49  | 0.31  | 4.235 |                      |           |
| 22.72  | -0.2  | 2.559 |                      |           |
| 34.56  | -1.24 | 2.918 |                      |           |
| 12.87  | -0.33 | 3.066 | Sema                 | 47-546    |
| 14.79  | 0.27  | 3.122 | Sema                 | 47-546    |
| 159.05 | -0.4  | 2.817 |                      |           |
| >200   | -0.59 | 2.772 |                      |           |
| >200   | -0.43 | 1.757 |                      |           |
| 9.81   | -1.74 | 3.432 | LDL-receptor class A | 452-487   |
| 17.79  | -0.16 | 3.06  | Ig-like 2            | 148-235   |
| 18.39  | -0.49 | 1.658 | Ig-like 2            | 148-235   |
| 3.60   | -0.49 | 2.211 |                      |           |
| 21.80  | -0.25 | 3.861 |                      |           |
| 19.30  | -0.04 | 1.837 |                      |           |

---

**Annotation**

---

K132L\_HUMAN UPF0577 protein KIAA1324-like  
LPP1\_HUMAN Lipid phosphate phosphohydrolase 1  
ADA10\_HUMAN Disintegrin and metalloproteinase domain-containing protein 10  
NRP1\_HUMAN Neuropilin-1  
NRP1\_HUMAN Neuropilin-1  
PLXB2\_HUMAN Plexin-B2  
PLXB2\_HUMAN Plexin-B2  
PLXB2\_HUMAN Plexin-B2  
PLXB2\_HUMAN Plexin-B2  
LAMA5\_HUMAN Laminin subunit alpha-5  
LAMA5\_HUMAN Laminin subunit alpha-5  
LAMA5\_HUMAN Laminin subunit alpha-5  
NCAM2\_HUMAN Neural cell adhesion molecule 2  
NCAM2\_HUMAN Neural cell adhesion molecule 2  
NCAM2\_HUMAN Neural cell adhesion molecule 2  
PLXB1\_HUMAN Plexin-B1  
LPP2\_HUMAN Lipid phosphate phosphohydrolase 2  
MPZL2\_HUMAN Myelin protein zero-like protein 2  
TSN3\_HUMAN Tetraspanin-3  
H2B1K\_HUMAN Histone H2B type 1-K  
RAMP3\_HUMAN Receptor activity-modifying protein 3  
IGSF3\_HUMAN Immunoglobulin superfamily member 3  
ICOSL\_HUMAN ICOS ligand  
ICOSL\_HUMAN ICOS ligand  
ATRN\_HUMAN Attractin  
TSN9\_HUMAN Tetraspanin-9  
S22A5\_HUMAN Solute carrier family 22 member 5  
PRS23\_HUMAN Serine protease 23  
S1PR2\_HUMAN Sphingosine 1-phosphate receptor 2  
CSPG5\_HUMAN Chondroitin sulfate proteoglycan 5  
LYPD3\_HUMAN Ly6/PLAUR domain-containing protein 3  
LYPD3\_HUMAN Ly6/PLAUR domain-containing protein 3  
LYPD3\_HUMAN Ly6/PLAUR domain-containing protein 3  
MPZL1\_HUMAN Myelin protein zero-like protein 1  
TSN13\_HUMAN Tetraspanin-13  
TSN15\_HUMAN Tetraspanin-15  
1A02\_HUMAN HLA class I histocompatibility antigen, A-2 alpha chain

TFR1\_HUMAN Transferrin receptor protein 1  
TFR1\_HUMAN Transferrin receptor protein 1  
PRIO\_HUMAN Major prion protein  
G3P\_HUMAN Glyceraldehyde-3-phosphate dehydrogenase  
G3P\_HUMAN Glyceraldehyde-3-phosphate dehydrogenase  
ERBB2\_HUMAN Receptor tyrosine-protein kinase erbB-2  
AT1B1\_HUMAN Sodium/potassium-transporting ATPase subunit beta-1  
AT1B1\_HUMAN Sodium/potassium-transporting ATPase subunit beta-1  
ICAM1\_HUMAN Intercellular adhesion molecule 1  
ICAM1\_HUMAN Intercellular adhesion molecule 1  
ITB1\_HUMAN Integrin beta-1  
ITB1\_HUMAN Integrin beta-1  
ITB1\_HUMAN Integrin beta-1  
ITB1\_HUMAN Integrin beta-1  
INSR\_HUMAN Insulin receptor  
AGAL\_HUMAN Alpha-galactosidase A  
CEAM5\_HUMAN Carcinoembryonic antigen-related cell adhesion molecule 5  
ITAV\_HUMAN Integrin alpha-V  
ITAV\_HUMAN Integrin alpha-V  
ITAV\_HUMAN Integrin alpha-V  
ITAV\_HUMAN Integrin alpha-V  
IGF1R\_HUMAN Insulin-like growth factor 1 receptor  
IGF1R\_HUMAN Insulin-like growth factor 1 receptor  
IGF1R\_HUMAN Insulin-like growth factor 1 receptor  
DAF\_HUMAN Complement decay-accelerating factor  
4F2\_HUMAN 4F2 cell-surface antigen heavy chain  
4F2\_HUMAN 4F2 cell-surface antigen heavy chain  
4F2\_HUMAN 4F2 cell-surface antigen heavy chain  
NEP\_HUMAN Neprilysin  
NEP\_HUMAN Neprilysin  
ITA5\_HUMAN Integrin alpha-5  
ITA5\_HUMAN Integrin alpha-5  
ITA5\_HUMAN Integrin alpha-5  
TACD2\_HUMAN Tumor-associated calcium signal transducer 2  
TACD2\_HUMAN Tumor-associated calcium signal transducer 2  
TACD2\_HUMAN Tumor-associated calcium signal transducer 2  
PTPRF\_HUMAN Receptor-type tyrosine-protein phosphatase F  
CLUS\_HUMAN Clusterin

LAMC1\_HUMAN Laminin subunit gamma-1  
LAMC1\_HUMAN Laminin subunit gamma-1  
LAMC1\_HUMAN Laminin subunit gamma-1  
LAMC1\_HUMAN Laminin subunit gamma-1  
GTR1\_HUMAN Solute carrier family 2, facilitated glucose transporter member 1  
LAMP1\_HUMAN Lysosome-associated membrane glycoprotein 1  
MPRI\_HUMAN Cation-independent mannose-6-phosphate receptor  
ACE\_HUMAN Angiotensin-converting enzyme  
ACE\_HUMAN Angiotensin-converting enzyme  
LAMP2\_HUMAN Lysosome-associated membrane glycoprotein 2  
CD59\_HUMAN CD59 glycoprotein  
INGR1\_HUMAN Interferon gamma receptor 1  
ITB4\_HUMAN Integrin beta-4  
EPCAM\_HUMAN Epithelial cell adhesion molecule  
INAR1\_HUMAN Interferon alpha/beta receptor 1  
ITA2\_HUMAN Integrin alpha-2  
ITA2\_HUMAN Integrin alpha-2  
LFA3\_HUMAN Lymphocyte function-associated antigen 3  
MPRD\_HUMAN Cation-dependent mannose-6-phosphate receptor  
MPRD\_HUMAN Cation-dependent mannose-6-phosphate receptor  
5NTD\_HUMAN 5'-nucleotidase  
ERBB3\_HUMAN Receptor tyrosine-protein kinase erbB-3  
ERBB3\_HUMAN Receptor tyrosine-protein kinase erbB-3  
CD9\_HUMAN CD9 antigen  
CADH3\_HUMAN Cadherin-3  
ENPP1\_HUMAN Ectonucleotide pyrophosphatase/phosphodiesterase family member 1  
ENPP1\_HUMAN Ectonucleotide pyrophosphatase/phosphodiesterase family member 1  
ENPP1\_HUMAN Ectonucleotide pyrophosphatase/phosphodiesterase family member 1  
TNR6\_HUMAN Tumor necrosis factor receptor superfamily member 6  
TNR6\_HUMAN Tumor necrosis factor receptor superfamily member 6  
ITA3\_HUMAN Integrin alpha-3  
ITB8\_HUMAN Integrin beta-8

EPHB2\_HUMAN Ephrin type-B receptor 2  
1B15\_HUMAN HLA class I histocompatibility antigen, B-15 alpha chain  
CTR1\_HUMAN High affinity cationic amino acid transporter 1  
CTR1\_HUMAN High affinity cationic amino acid transporter 1  
CALCR\_HUMAN Calcitonin receptor  
L1CAM\_HUMAN Neural cell adhesion molecule L1  
L1CAM\_HUMAN Neural cell adhesion molecule L1  
L1CAM\_HUMAN Neural cell adhesion molecule L1  
GPC1\_HUMAN Glypican-1  
BASI\_HUMAN Basigin  
BASI\_HUMAN Basigin  
BASI\_HUMAN Basigin  
IL6RB\_HUMAN Interleukin-6 receptor subunit beta  
IL6RB\_HUMAN Interleukin-6 receptor subunit beta  
ECE1\_HUMAN Endothelin-converting enzyme 1  
CD97\_HUMAN CD97 antigen  
SERPH\_HUMAN Serpin H1  
BCAM\_HUMAN Basal cell adhesion molecule  
CLCN5\_HUMAN H(+)/Cl(-) exchange transporter 5  
PLXA3\_HUMAN Plexin-A3  
CTR2\_HUMAN Low affinity cationic amino acid transporter 2  
EFNA3\_HUMAN Ephrin-A3  
PTTG\_HUMAN Pituitary tumor-transforming gene 1 protein-interacting protein  
AT1B3\_HUMAN Sodium/potassium-transporting ATPase subunit beta-3  
LAMB2\_HUMAN Laminin subunit beta-2  
LAMB2\_HUMAN Laminin subunit beta-2  
CLD12\_HUMAN Claudin-12  
JAG1\_HUMAN Protein jagged-1  
ADA17\_HUMAN Disintegrin and metalloproteinase domain-containing protein 17  
ADA17\_HUMAN Disintegrin and metalloproteinase domain-containing protein 17  
IL13R1\_HUMAN Interleukin-13 receptor subunit alpha-1  
PGBM\_HUMAN Basement membrane-specific heparan sulfate proteoglycan core protein  
DSC2\_HUMAN Desmocollin-2  
DSC2\_HUMAN Desmocollin-2  
UPAR\_HUMAN Urokinase plasminogen activator surface receptor  
LRP1\_HUMAN Prolow-density lipoprotein receptor-related protein 1  
LRP1\_HUMAN Prolow-density lipoprotein receptor-related protein 1

PCDH1\_HUMAN Protocadherin-1  
I10R2\_HUMAN Interleukin-10 receptor subunit beta  
I10R2\_HUMAN Interleukin-10 receptor subunit beta  
CD47\_HUMAN Leukocyte surface antigen CD47  
CD47\_HUMAN Leukocyte surface antigen CD47  
PTPRJ\_HUMAN Receptor-type tyrosine-protein phosphatase eta  
PTK7\_HUMAN Inactive tyrosine-protein kinase 7  
PTK7\_HUMAN Inactive tyrosine-protein kinase 7  
PTPRS\_HUMAN Receptor-type tyrosine-protein phosphatase S  
S39A6\_HUMAN Zinc transporter ZIP6  
S39A6\_HUMAN Zinc transporter ZIP6  
ADA15\_HUMAN Disintegrin and metalloproteinase domain-containing protein 15  
TPBG\_HUMAN Trophoblast glycoprotein  
TPBG\_HUMAN Trophoblast glycoprotein  
TPBG\_HUMAN Trophoblast glycoprotein  
CD166\_HUMAN CD166 antigen  
CD166\_HUMAN Isoform 2 of CD166 antigen  
SPTN1\_HUMAN Spectrin alpha chain, non-erythrocytic 1  
DSG2\_HUMAN Desmoglein-2  
DSG2\_HUMAN Desmoglein-2  
DSG2\_HUMAN Desmoglein-2  
S29A2\_HUMAN Equilibrative nucleoside transporter 2  
GPNMB\_HUMAN Transmembrane glycoprotein NMB  
S39AE\_HUMAN Zinc transporter ZIP14  
PVRL1\_HUMAN Poliovirus receptor-related protein 1  
PVRL1\_HUMAN Poliovirus receptor-related protein 1  
PVRL1\_HUMAN Poliovirus receptor-related protein 1  
PTPRK\_HUMAN Receptor-type tyrosine-protein phosphatase kappa  
ERBB4\_HUMAN Receptor tyrosine-protein kinase erbB-4  
ERBB4\_HUMAN Receptor tyrosine-protein kinase erbB-4  
AAAT\_HUMAN Neutral amino acid transporter B(0)  
VAS1\_HUMAN V-type proton ATPase subunit S1  
SYPL1\_HUMAN Synaptophysin-like protein 1  
MICA\_HUMAN MHC class I polypeptide-related sequence A  
CC50B\_HUMAN Cell cycle control protein 50B  
F174B\_HUMAN Membrane protein FAM174B

ANO6\_HUMAN Anoctamin-6  
ANO6\_HUMAN Anoctamin-6  
NADL2\_HUMAN Inactive N-acetylated-alpha-linked acidic dipeptidase-like protein 2  
NADL2\_HUMAN Inactive N-acetylated-alpha-linked acidic dipeptidase-like protein 2  
SDK2\_HUMAN Protein sidekick-2  
SDK2\_HUMAN Protein sidekick-2  
ENTP8\_HUMAN Ectonucleoside triphosphate diphosphohydrolase 8  
CAHD1\_HUMAN VWFA and cache domain-containing protein 1  
CD276\_HUMAN CD276 antigen  
CD276\_HUMAN CD276 antigen  
CD276\_HUMAN CD276 antigen  
CD276\_HUMAN CD276 antigen  
STEAP3\_HUMAN Metalloreductase STEAP3  
VASN\_HUMAN Vasorin  
RET1G\_HUMAN Retinoic acid early transcript 1G protein  
CNNM4\_HUMAN Metal transporter CNNM4  
CNNM4\_HUMAN Metal transporter CNNM4  
NPNT\_HUMAN Nephronectin  
CD109\_HUMAN CD109 antigen  
CD109\_HUMAN CD109 antigen  
THSD4\_HUMAN Thrombospondin type-1 domain-containing protein 4  
SDK1\_HUMAN Protein sidekick-1  
GP126\_HUMAN G-protein coupled receptor 126  
CTL2\_HUMAN Choline transporter-like protein 2  
LRC8A\_HUMAN Leucine-rich repeat-containing protein 8A  
SULF2\_HUMAN Extracellular sulfatase Sulf-2  
SULF2\_HUMAN Extracellular sulfatase Sulf-2  
VSI10\_HUMAN V-set and immunoglobulin domain-containing protein 10  
PROM2\_HUMAN Prominin-2  
IGSF1\_HUMAN Immunoglobulin superfamily member 1  
DCBD1\_HUMAN Discoidin, CUB and LCCL domain-containing protein 1  
RN149\_HUMAN E3 ubiquitin-protein ligase RNF149  
CNNM3\_HUMAN Metal transporter CNNM3  
CADM4\_HUMAN Cell adhesion molecule 4  
PCD19\_HUMAN Protocadherin-19  
CTL1\_HUMAN Choline transporter-like protein 1  
LIPH\_HUMAN Lipase member H  
MUC16\_HUMAN Mucin-16  
PIEZ1\_HUMAN Piezo-type mechanosensitive ion channel component 1  
PIEZ1\_HUMAN Piezo-type mechanosensitive ion channel component 1  
NICA\_HUMAN Nicastrin  
NICA\_HUMAN Nicastrin  
NICA\_HUMAN Nicastrin

NRCAM\_HUMAN Neuronal cell adhesion molecule  
NRCAM\_HUMAN Neuronal cell adhesion molecule  
NRCAM\_HUMAN Neuronal cell adhesion molecule  
SEM4D\_HUMAN Semaphorin-4D  
CA159\_HUMAN Uncharacterized protein C1orf159  
TM87B\_HUMAN Transmembrane protein 87B  
PCFT\_HUMAN Proton-coupled folate transporter  
MYCT\_HUMAN Proton myo-inositol cotransporter  
PANX1\_HUMAN Pannexin-1  
SORT\_HUMAN Sortilin  
P2RX4\_HUMAN P2X purinoceptor 4  
TM2D3\_HUMAN TM2 domain-containing protein 3  
LRFN3\_HUMAN Leucine-rich repeat and fibronectin type-III domain-containing protein 3  
SEM4C\_HUMAN Semaphorin-4C  
SEM4C\_HUMAN Semaphorin-4C  
MAGT1\_HUMAN Magnesium transporter protein 1  
ITFG3\_HUMAN Protein ITFG3  
ITFG3\_HUMAN Protein ITFG3  
S12A5\_HUMAN Solute carrier family 12 member 5  
ANTR1\_HUMAN Anthrax toxin receptor 1  
CNNM2\_HUMAN Metal transporter CNNM2  
PCDH9\_HUMAN Protocadherin-9  
NCKX3\_HUMAN Sodium/potassium/calcium exchanger 3  
TMM8A\_HUMAN Transmembrane protein 8A  
CELR2\_HUMAN Cadherin EGF LAG seven-pass G-type receptor 2  
APMAP\_HUMAN Adipocyte plasma membrane-associated protein  
IL1AP\_HUMAN Interleukin-1 receptor accessory protein  
CC50A\_HUMAN Cell cycle control protein 50A  
CELR1\_HUMAN Cadherin EGF LAG seven-pass G-type receptor 1  
CELR1\_HUMAN Cadherin EGF LAG seven-pass G-type receptor 1  
FLRT3\_HUMAN Leucine-rich repeat transmembrane protein FLRT3  
JKAMP\_HUMAN JNK1/MAPK8-associated membrane protein  
FPRP\_HUMAN Prostaglandin F2 receptor negative regulator  
FPRP\_HUMAN Prostaglandin F2 receptor negative regulator  
FPRP\_HUMAN Prostaglandin F2 receptor negative regulator  
SUSD2\_HUMAN Sushi domain-containing protein 2  
PCYOX\_HUMAN Prenylcysteine oxidase 1  
TMEM2\_HUMAN Transmembrane protein 2

TMEM2\_HUMAN Transmembrane protein 2  
SO3A1\_HUMAN Solute carrier organic anion transporter family member 3A1  
PLXA1\_HUMAN Plexin-A1  
S39AA\_HUMAN Zinc transporter ZIP10  
NOTC3\_HUMAN Neurogenic locus notch homolog protein 3  
S6A14\_HUMAN Sodium- and chloride-dependent neutral and basic amino acid transporter B(0+)  
S6A14\_HUMAN Sodium- and chloride-dependent neutral and basic amino acid transporter B(0+)  
S6A14\_HUMAN Sodium- and chloride-dependent neutral and basic amino acid transporter B(0+)  
FZD1\_HUMAN Frizzled-1  
PLXD1\_HUMAN Plexin-D1  
PLXD1\_HUMAN Plexin-D1  
PLXD1\_HUMAN Plexin-D1  
HYOU1\_HUMAN Hypoxia up-regulated protein 1  
HYOU1\_HUMAN Hypoxia up-regulated protein 1  
ST14\_HUMAN Suppressor of tumorigenicity 14 protein  
NPTN\_HUMAN Neuroplastin  
NPTN\_HUMAN Neuroplastin  
GPR56\_HUMAN G-protein coupled receptor 56  
S4A7\_HUMAN Sodium bicarbonate cotransporter 3  
S4A7\_HUMAN Sodium bicarbonate cotransporter 3

**Table S5 - The Half-Lives of 220 Quan**

| <b>Uniprot ID</b> | <b>Gene Symbol</b> | <b>Half-Life (h)</b> |
|-------------------|--------------------|----------------------|
| A1A5B4            | ANO9               | 14.59                |
| F2Z333            | C1orf233           | 20.43                |
| O14494            | PPAP2A             | 113.14               |
| O14672            | ADAM10             | 22.42                |
| O14786            | NRP1               | 5.16                 |
| O15031            | PLXNB2             | 15.80                |
| O15230            | LAMA5              | 17.65                |
| O15393            | TMPRSS2            | 11.90                |
| O15394            | NCAM2              | 103.25               |
| O43157            | PLXNB1             | 19.91                |
| O43194            | GPR39              | 40.55                |
| O60487            | MPZL2              | 14.10                |
| O60603            | TLR2               | 14.92                |
| O60637            | TSPAN3             | 10.82                |
| O60896            | RAMP3              | 18.74                |
| O75054            | IGSF3              | 21.46                |
| O75144            | ICOSLG             | 108.24               |
| O75882            | ATRN               | 41.99                |
| O75954            | TSPAN9             | 8.77                 |
| O76082            | SLC22A5            | 39.80                |
| O94805            | ACTL6B             | >200                 |
| O95084            | PRSS23             | 19.51                |
| O95136            | S1PR2              | 28.67                |
| O95274            | LYPD3              | 5.05                 |
| O95297            | MPZL1              | 5.36                 |
| O95857            | TSPAN13            | 10.39                |
| O95858            | TSPAN15            | 16.32                |
| P01892            | HLA-A              | 25.61                |
| P02786            | TFRC               | 20.39                |
| P04156            | PRNP               | 13.70                |
| P04406            | GAPDH              | >200                 |
| P04626            | ERBB2              | >200                 |
| P05026            | ATP1B1             | 23.11                |
| P05362            | ICAM1              | 22.68                |
| P05556            | ITGB1              | 20.62                |
| P06213            | INSR               | 16.05                |
| P06731            | CEACAM5            | 17.88                |
| P06756            | ITGAV              | 14.52                |
| P07339            | CTSD               | >200                 |
| P07602            | PSAP               | 11.90                |
| P08069            | IGF1R              | 11.46                |

|        |         |        |
|--------|---------|--------|
| P08174 | CD55    | >200   |
| P08195 | SLC3A2  | 29.26  |
| P08473 | MME     | 94.42  |
| P08648 | ITGA5   | 19.86  |
| P08962 | CD63    | 22.60  |
| P09758 | TACSTD2 | 12.77  |
| P10586 | PTPRF   | 7.18   |
| P10909 | CLU     | 9.55   |
| P11047 | LAMC1   | 4.88   |
| P11166 | SLC2A1  | 15.74  |
| P11279 | LAMP1   | 124.11 |
| P11362 | FGFR1   | 5.47   |
| P11717 | IGF2R   | 14.86  |
| P12821 | ACE     | >200   |
| P13473 | LAMP2   | >200   |
| P15151 | PVR     | 58.65  |
| P15260 | IFNGR1  | 3.75   |
| P16070 | CD44    | 11.29  |
| P16144 | ITGB4   | 19.90  |
| P16422 | EPCAM   | 16.40  |
| P17181 | IFNAR1  | 10.44  |
| P17301 | ITGA2   | 27.76  |
| P18564 | ITGB6   | 9.93   |
| P19256 | CD58    | 21.71  |
| P20645 | M6PR    | 133.12 |
| P21589 | NT5E    | 26.08  |
| P21860 | ERBB3   | 4.61   |
| P22223 | CDH3    | 2.97   |
| P22413 | ENPP1   | 25.21  |
| P23229 | ITGA6   | 17.83  |
| P25106 | ACKR3   | 3.03   |
| P25445 | FAS     | 45.16  |
| P26006 | ITGA3   | 35.32  |
| P26012 | ITGB8   | 6.99   |
| P27701 | CD82    | >200   |
| P27824 | CANX    | >200   |
| P29323 | EPHB2   | 20.83  |
| P30464 | HLA-B   | 11.61  |
| P30825 | SLC7A1  | 18.67  |
| P30988 | CALCR   | >200   |
| P32004 | L1CAM   | 11.29  |
| P35052 | GPC1    | 28.39  |
| P35613 | BSG     | 14.41  |
| P36941 | LTBR    | >200   |

|          |          |        |
|----------|----------|--------|
| P40189   | IL6ST    | 15.88  |
| P42892   | ECE1     | 23.97  |
| P48509   | CD151    | 111.12 |
| P48960   | CD97     | 16.49  |
| P50454   | SERPINH1 | 17.10  |
| P50895   | BCAM     | 8.42   |
| P51795   | CLCN5    | 45.32  |
| P51805   | PLXNA3   | >200   |
| P52569   | SLC7A2   | 6.49   |
| P52797   | EFNA3    | 10.41  |
| P53801   | PTTG1IP  | 15.51  |
| P54709   | ATP1B3   | 64.66  |
| P55268   | LAMB2    | 13.13  |
| P56159   | GFRA1    | 7.32   |
| P78504   | JAG1     | 8.15   |
| P78536   | ADAM17   | 115.34 |
| P98160   | HSPG2    | >200   |
| Q02487   | DSC2     | 15.54  |
| Q03405   | PLAUR    | 16.55  |
| Q04721   | NOTCH2   | 32.02  |
| Q07954   | LRP1     | 19.49  |
| Q08334   | IL10RB   | 5.03   |
| Q08722   | CD47     | 92.40  |
| Q12913   | PTPRJ    | 106.28 |
| Q13308   | PTK7     | 10.04  |
| Q13332   | PTPRS    | 16.10  |
| Q13433   | SLC39A6  | 8.09   |
| Q13444   | ADAM15   | 29.70  |
| Q13641   | TPBG     | 14.84  |
| Q13740-2 | ALCAM    | 19.84  |
| Q14118   | DAG1     | 19.38  |
| Q14126   | DSG2     | 12.33  |
| Q14542   | SLC29A2  | 37.04  |
| Q14956   | GPNMB    | >200   |
| Q15043   | SLC39A14 | >200   |
| Q15223   | PVRL1    | 19.84  |
| Q15262   | PTPRK    | 32.97  |
| Q15303   | ERBB4    | 12.88  |
| Q15758   | SLC1A5   | 21.40  |
| Q15768   | EFNB3    | 7.30   |
| Q15904   | ATP6AP1  | 54.41  |
| Q16563   | SYPL1    | >200   |
| Q29980   | MICB     | 6.85   |
| Q29983   | MICA     | 16.75  |

|        |          |        |
|--------|----------|--------|
| Q3MIR4 | TMEM30B  | 39.26  |
| Q4KMQ2 | ANO6     | 111.33 |
| Q58DX5 | NAALADL2 | 22.36  |
| Q58EX2 | SDK2     | 29.81  |
| Q5HYA8 | TMEM67   | 41.97  |
| Q5MY95 | ENTPD8   | 55.49  |
| Q5SZK8 | FREM2    | 5.60   |
| Q5VU97 | CACHD1   | 13.84  |
| Q5VW38 | GPR107   | 128.79 |
| Q5ZPR3 | CD276    | 18.59  |
| Q658P3 | STEAP3   | 18.19  |
| Q6EMK4 | VASN     | >200   |
| Q6H3X3 | RAET1G   | 12.06  |
| Q6P4Q7 | CNNM4    | 30.34  |
| Q6PCB8 | EMB      | 23.43  |
| Q6UXD5 | SEZ6L2   | 16.43  |
| Q6UXG2 | KIAA1324 | 13.76  |
| Q6UXI9 | NPNT     | 9.14   |
| Q6YHK3 | CD109    | 7.73   |
| Q6ZMP0 | THSD4    | 8.64   |
| Q6ZUK4 | TMEM26   | 14.20  |
| Q7KYR7 | BTN2A1   | 25.17  |
| Q7Z5N4 | SDK1     | 20.57  |
| Q86SQ4 | GPR126   | 23.83  |
| Q86UF1 | TSPAN33  | 28.42  |
| Q86WC4 | OSTM1    | >200   |
| Q8IWA5 | SLC44A2  | 38.78  |
| Q8IWT6 | LRRC8A   | 15.63  |
| Q8IWU5 | SULF2    | 5.76   |
| Q8N0Z9 | VSIG10   | 18.72  |
| Q8N271 | PROM2    | 17.92  |
| Q8N441 | FGFRL1   | 14.68  |
| Q8N6C5 | IGSF1    | >200   |
| Q8N8Z6 | DCBLD1   | 8.96   |
| Q8NBN3 | TMEM87A  | 12.19  |
| Q8NC42 | RNF149   | >200   |
| Q8NCS7 | SLC44A5  | 137.47 |
| Q8NFZ8 | CADM4    | 21.49  |
| Q8TAB3 | PCDH19   | 12.49  |
| Q8TB96 | ITFG1    | 28.06  |
| Q8TCT8 | SPPL2A   | 28.55  |
| Q8WTV0 | SCARB1   | 9.07   |
| Q8WWY8 | LIPH     | 18.43  |
| Q8WXI7 | MUC16    | 54.28  |

|          |          |        |
|----------|----------|--------|
| Q92508   | PIEZO1   | 52.00  |
| Q92542   | NCSTN    | 113.46 |
| Q92823   | NRCAM    | 21.64  |
| Q92854   | SEMA4D   | 9.71   |
| Q96HA4   | C1orf159 | 32.03  |
| Q96K49   | TMEM87B  | >200   |
| Q96NT5   | SLC46A1  | 37.88  |
| Q96NY8   | PVRL4    | 27.56  |
| Q96QE2   | SLC2A13  | >200   |
| Q96RD7   | PANX1    | 70.71  |
| Q99523   | SORT1    | 7.50   |
| Q99571   | P2RX4    | 37.56  |
| Q9BY67   | CADM1    | 23.71  |
| Q9BZC7   | ABCA2    | 106.32 |
| Q9C0C4   | SEMA4C   | 13.40  |
| Q9H0U3   | MAGT1    | 34.72  |
| Q9H0X4   | ITFG3    | 14.20  |
| Q9H8M5   | CNNM2    | 17.08  |
| Q9HC56   | PCDH9    | 11.28  |
| Q9HCN3   | TMEM8A   | 23.49  |
| Q9HCU4   | CELSR2   | 9.55   |
| Q9HDC9   | APMAP    | 11.16  |
| Q9NPH3   | IL1RAP   | 13.93  |
| Q9NPR2   | SEMA4B   | 19.13  |
| Q9NYQ6   | CELSR1   | 7.51   |
| Q9P055   | JKAMP    | 12.68  |
| Q9P0K1   | ADAM22   | 33.22  |
| Q9P2B2   | PTGFRN   | 10.55  |
| Q9UGT4   | SUSD2    | 32.01  |
| Q9UHG3   | PCYOX1   | 13.76  |
| Q9UHN6   | TMEM2    | 21.68  |
| Q9UHW9   | SLC12A6  | 17.57  |
| Q9UIG8   | SLCO3A1  | 11.51  |
| Q9UIW2   | PLXNA1   | 8.09   |
| Q9UJ14   | GGT7     | 15.72  |
| Q9UJW2-2 | TINAG    | >200   |
| Q9ULF5   | SLC39A10 | 52.95  |
| Q9ULI3   | HEG1     | >200   |
| Q9UM47   | NOTCH3   | 18.68  |
| Q9UN76   | SLC6A14  | 18.89  |
| Q9UP38   | FZD1     | 21.51  |
| Q9Y4D7   | PLXND1   | 21.02  |
| Q9Y4L1   | HYOU1    | 15.53  |
| Q9Y5L3   | ENTPD2   | 9.36   |

|        |        |       |
|--------|--------|-------|
| Q9Y5Y6 | ST14   | 9.68  |
| Q9Y639 | NPTN   | 19.94 |
| Q9Y6M7 | SLC4A7 | 26.56 |

## Identified Cell-Surface N-Glycoproteins in Expt# 1

| Unique Glycopeptide Hits | Annotation                                                                 |
|--------------------------|----------------------------------------------------------------------------|
| 1                        | ANO9_HUMAN Anoctamin-9                                                     |
| 1                        | CA233_HUMAN Fibronectin type-III domain-containing transmembrane protein 1 |
| 2                        | LPP1_HUMAN Lipid phosphate phosphohydrolase 1                              |
| 1                        | ADA10_HUMAN Disintegrin and metalloproteinase domain-containing protein 10 |
| 2                        | NRP1_HUMAN Neuropilin-1                                                    |
| 7                        | PLXB2_HUMAN Plexin-B2                                                      |
| 2                        | LAMA5_HUMAN Laminin subunit alpha-5                                        |
| 1                        | TMPS2_HUMAN Transmembrane protease serine 2                                |
| 4                        | NCAM2_HUMAN Neural cell adhesion molecule 2                                |
| 1                        | PLXB1_HUMAN Plexin-B1                                                      |
| 1                        | GPR39_HUMAN G-protein coupled receptor 39                                  |
| 1                        | MPZL2_HUMAN Myelin protein zero-like protein 2                             |
| 1                        | TLR2_HUMAN Toll-like receptor 2                                            |
| 2                        | TSN3_HUMAN Tetraspanin-3                                                   |
| 1                        | RAMP3_HUMAN Receptor activity-modifying protein 3                          |
| 6                        | IGSF3_HUMAN Immunoglobulin superfamily member 3                            |
| 2                        | ICOSL_HUMAN ICOS ligand                                                    |
| 3                        | ATRN_HUMAN Attractin                                                       |
| 2                        | TSN9_HUMAN Tetraspanin-9                                                   |
| 2                        | S22A5_HUMAN Solute carrier family 22 member 5                              |
| 1                        | ACL6B_HUMAN Actin-like protein 6B                                          |
| 2                        | PRS23_HUMAN Serine protease 23                                             |
| 1                        | S1PR2_HUMAN Sphingosine 1-phosphate receptor 2                             |
| 3                        | LYPD3_HUMAN Ly6/PLAUR domain-containing protein 3                          |
| 1                        | MPZL1_HUMAN Myelin protein zero-like protein 1                             |
| 1                        | TSN13_HUMAN Tetraspanin-13                                                 |
| 2                        | TSN15_HUMAN Tetraspanin-15                                                 |
| 1                        | 1A02_HUMAN HLA class I histocompatibility antigen, A-2 alpha chain         |
| 5                        | TFR1_HUMAN Transferrin receptor protein 1                                  |
| 2                        | PRIo_HUMAN Major prion protein                                             |
| 2                        | G3P_HUMAN Glyceraldehyde-3-phosphate dehydrogenase                         |
| 2                        | ERBB2_HUMAN Receptor tyrosine-protein kinase erbB-2                        |
| 4                        | AT1B1_HUMAN Sodium/potassium-transporting ATPase subunit beta-1            |
| 3                        | ICAM1_HUMAN Intercellular adhesion molecule 1                              |
| 12                       | ITB1_HUMAN Integrin beta-1                                                 |
| 1                        | INSR_HUMAN Insulin receptor                                                |
| 7                        | CEAM5_HUMAN Carcinoembryonic antigen-related cell adhesion molecule 5      |
| 6                        | ITAV_HUMAN Integrin alpha-V                                                |
| 1                        | CATD_HUMAN Contaminant Cathepsin D                                         |
| 1                        | SAP_HUMAN Prosaposin                                                       |
| 7                        | IGF1R_HUMAN Insulin-like growth factor 1 receptor                          |

2 DAF\_HUMAN Complement decay-accelerating factor  
4 4F2\_HUMAN 4F2 cell-surface antigen heavy chain  
1 NEP\_HUMAN Neprilysin  
4 ITA5\_HUMAN Integrin alpha-5  
1 CD63\_HUMAN CD63 antigen  
7 TACD2\_HUMAN Tumor-associated calcium signal transducer 2  
2 PTPRF\_HUMAN Receptor-type tyrosine-protein phosphatase F  
2 CLUS\_HUMAN Clusterin  
4 LAMC1\_HUMAN Laminin subunit gamma-1  
1 GTR1\_HUMAN Solute carrier family 2, facilitated glucose transp  
4 LAMP1\_HUMAN Lysosome-associated membrane glycoprotein 1  
1 FGFR1\_HUMAN Fibroblast growth factor receptor 1  
1 MPRI\_HUMAN Cation-independent mannose-6-phosphate recept  
2 ACE\_HUMAN Angiotensin-converting enzyme  
4 LAMP2\_HUMAN Lysosome-associated membrane glycoprotein 2  
1 PVR\_HUMAN Poliovirus receptor  
1 INGR1\_HUMAN Interferon gamma receptor 1  
3 CD44\_HUMAN CD44 antigen  
1 ITB4\_HUMAN Integrin beta-4  
3 EPCAM\_HUMAN Epithelial cell adhesion molecule  
2 INAR1\_HUMAN Interferon alpha/beta receptor 1  
5 ITA2\_HUMAN Integrin alpha-2  
1 ITB6\_HUMAN Integrin beta-6  
2 LFA3\_HUMAN Lymphocyte function-associated antigen 3  
2 MPRD\_HUMAN Cation-dependent mannose-6-phosphate recepto  
3 5NTD\_HUMAN 5'-nucleotidase  
3 ERBB3\_HUMAN Receptor tyrosine-protein kinase erbB-3  
1 CADH3\_HUMAN Cadherin-3  
4 ENPP1\_HUMAN Ectonucleotide pyrophosphatase/phosphodiester  
2 ITA6\_HUMAN Integrin alpha-6  
1 ACKR3\_HUMAN Atypical chemokine receptor 3  
1 TNR6\_HUMAN Tumor necrosis factor receptor superfamily meml  
6 ITA3\_HUMAN Integrin alpha-3  
1 ITB8\_HUMAN Integrin beta-8  
1 CD82\_HUMAN CD82 antigen  
1 CALX\_HUMAN Calnexin  
1 EPHB2\_HUMAN Ephrin type-B receptor 2  
1 1B15\_HUMAN HLA class I histocompatibility antigen, B-15 alph  
2 CTR1\_HUMAN High affinity cationic amino acid transporter 1  
2 CALCR\_HUMAN Calcitonin receptor  
3 L1CAM\_HUMAN Neural cell adhesion molecule L1  
1 GPC1\_HUMAN Glypican-1  
5 BASI\_HUMAN Basigin  
1 TNR3\_HUMAN Tumor necrosis factor receptor superfamily meml

|    |                                                               |
|----|---------------------------------------------------------------|
| 3  | IL6RB_HUMAN Interleukin-6 receptor subunit beta               |
| 12 | ECE1_HUMAN Endothelin-converting enzyme 1                     |
| 2  | CD151_HUMAN CD151 antigen                                     |
| 5  | CD97_HUMAN CD97 antigen                                       |
| 1  | SERPH_HUMAN Serpin H1                                         |
| 1  | BCAM_HUMAN Basal cell adhesion molecule                       |
| 2  | CLCN5_HUMAN H(+)/Cl(-) exchange transporter 5                 |
| 1  | PLXA3_HUMAN Plexin-A3                                         |
| 1  | CTR2_HUMAN Low affinity cationic amino acid transporter 2     |
| 1  | EFNA3_HUMAN Ephrin-A3                                         |
| 1  | PTTG_HUMAN Pituitary tumor-transforming gene 1 protein-inter. |
| 4  | AT1B3_HUMAN Sodium/potassium-transporting ATPase subunit      |
| 1  | LAMB2_HUMAN Laminin subunit beta-2                            |
| 5  | GFRA1_HUMAN GDNF family receptor alpha-1                      |
| 1  | JAG1_HUMAN Protein jagged-1                                   |
| 5  | ADA17_HUMAN Disintegrin and metalloproteinase domain-conta    |
| 1  | PGBM_HUMAN Basement membrane-specific heparan sulfate pro     |
| 1  | DSC2_HUMAN Desmocollin-2                                      |
| 1  | UPAR_HUMAN Urokinase plasminogen activator surface recepto    |
| 1  | NOTC2_HUMAN Neurogenic locus notch homolog protein 2          |
| 4  | LRP1_HUMAN Prolow-density lipoprotein receptor-related protei |
| 1  | I10R2_HUMAN Interleukin-10 receptor subunit beta              |
| 3  | CD47_HUMAN Leukocyte surface antigen CD47                     |
| 4  | PTPRJ_HUMAN Receptor-type tyrosine-protein phosphatase eta    |
| 3  | PTK7_HUMAN Inactive tyrosine-protein kinase 7                 |
| 1  | PTPRS_HUMAN Receptor-type tyrosine-protein phosphatase S      |
| 5  | S39A6_HUMAN Zinc transporter ZIP6                             |
| 2  | ADA15_HUMAN Disintegrin and metalloproteinase domain-conta    |
| 4  | TPBG_HUMAN Trophoblast glycoprotein                           |
| 13 | CD166_HUMAN Isoform 2 of CD166 antigen                        |
| 2  | DAG1_HUMAN Dystroglycan                                       |
| 2  | DSG2_HUMAN Desmoglein-2                                       |
| 1  | S29A2_HUMAN Equilibrative nucleoside transporter 2            |
| 1  | GPNMB_HUMAN Transmembrane glycoprotein NMB                    |
| 1  | S39AE_HUMAN Zinc transporter ZIP14                            |
| 4  | PVRL1_HUMAN Poliovirus receptor-related protein 1             |
| 3  | PTPRK_HUMAN Receptor-type tyrosine-protein phosphatase kap    |
| 2  | ERBB4_HUMAN Receptor tyrosine-protein kinase erbB-4           |
| 2  | AAAT_HUMAN Neutral amino acid transporter B(0)                |
| 1  | EFNB3_HUMAN Ephrin-B3                                         |
| 1  | VAS1_HUMAN V-type proton ATPase subunit S1                    |
| 1  | SYPL1_HUMAN Synaptophysin-like protein 1                      |
| 1  | MICB_HUMAN MHC class I polypeptide-related sequence B         |
| 5  | MICA_HUMAN MHC class I polypeptide-related sequence A         |

3 CC50B\_HUMAN Cell cycle control protein 50B  
2 ANO6\_HUMAN Anoctamin-6  
3 NADL2\_HUMAN Inactive N-acetylated-alpha-linked acidic dipep  
1 SDK2\_HUMAN Protein sidekick-2  
1 MKS3\_HUMAN Meckelin  
1 ENTP8\_HUMAN Ectonucleoside triphosphate diphosphohydrolas  
1 FREM2\_HUMAN FRAS1-related extracellular matrix protein 2  
1 CAHD1\_HUMAN VWFA and cache domain-containing protein 1  
1 GP107\_HUMAN Protein GPR107  
5 CD276\_HUMAN CD276 antigen  
1 STEA3\_HUMAN Metalloreductase STEAP3  
1 VASN\_HUMAN Vasorin  
1 RET1G\_HUMAN Retinoic acid early transcript 1G protein  
3 CNNM4\_HUMAN Metal transporter CNNM4  
1 EMB\_HUMAN Embigin  
1 SE6L2\_HUMAN Seizure 6-like protein 2  
1 K1324\_HUMAN UPF0577 protein KIAA1324  
1 NPNT\_HUMAN Nephronectin  
2 CD109\_HUMAN CD109 antigen  
1 THSD4\_HUMAN Thrombospondin type-1 domain-containing pro  
1 TMM26\_HUMAN Transmembrane protein 26  
1 BT2A1\_HUMAN Butyrophilin subfamily 2 member A1  
2 SDK1\_HUMAN Protein sidekick-1  
3 GP126\_HUMAN G-protein coupled receptor 126  
1 TSN33\_HUMAN Tetraspanin-33  
1 OSTM1\_HUMAN Osteopetrosis-associated transmembrane protei  
7 CTL2\_HUMAN Choline transporter-like protein 2  
1 LRC8A\_HUMAN Leucine-rich repeat-containing protein 8A  
1 SULF2\_HUMAN Extracellular sulfatase Sulf-2  
1 VSI10\_HUMAN V-set and immunoglobulin domain-containing pr  
1 PROM2\_HUMAN Prominin-2  
1 FGRL1\_HUMAN Fibroblast growth factor receptor-like 1  
1 IGSF1\_HUMAN Immunoglobulin superfamily member 1  
1 DCBD1\_HUMAN Discoidin, CUB and LCCL domain-containing  
1 TM87A\_HUMAN Transmembrane protein 87A  
1 RN149\_HUMAN E3 ubiquitin-protein ligase RNF149  
1 CTL5\_HUMAN Choline transporter-like protein 5  
2 CADM4\_HUMAN Cell adhesion molecule 4  
1 PCD19\_HUMAN Protocadherin-19  
1 TIP\_HUMAN T-cell immunomodulatory protein  
1 SPP2A\_HUMAN Signal peptide peptidase-like 2A  
1 SCRB1\_HUMAN Scavenger receptor class B member 1  
1 LIPH\_HUMAN Lipase member H  
1 MUC16\_HUMAN Mucin-16

4           PIEZ1\_HUMAN Piezo-type mechanosensitive ion channel compo  
4           NICA\_HUMAN Nicastrin  
5           NRCAM\_HUMAN Neuronal cell adhesion molecule  
1           SEM4D\_HUMAN Semaphorin-4D  
2           CA159\_HUMAN Uncharacterized protein C1orf159  
1           TM87B\_HUMAN Transmembrane protein 87B  
1           PCFT\_HUMAN Proton-coupled folate transporter  
1           PVRL4\_HUMAN Poliovirus receptor-related protein 4  
1           MYCT\_HUMAN Proton myo-inositol cotransporter  
1           PANX1\_HUMAN Pannexin-1  
1           SORT\_HUMAN Sortilin  
1           P2RX4\_HUMAN P2X purinoceptor 4  
2           CADM1\_HUMAN Cell adhesion molecule 1  
1           ABCA2\_HUMAN ATP-binding cassette sub-family A member 2  
5           SEM4C\_HUMAN Semaphorin-4C  
1           MAGT1\_HUMAN Magnesium transporter protein 1  
2           ITFG3\_HUMAN Protein ITFG3  
1           CNNM2\_HUMAN Metal transporter CNNM2  
1           PCDH9\_HUMAN Protocadherin-9  
2           TMM8A\_HUMAN Transmembrane protein 8A  
9           CELR2\_HUMAN Cadherin EGF LAG seven-pass G-type receptor  
1           APMAP\_HUMAN Adipocyte plasma membrane-associated protei  
1           IL1AP\_HUMAN Interleukin-1 receptor accessory protein  
1           SEM4B\_HUMAN Semaphorin-4B  
4           CELR1\_HUMAN Cadherin EGF LAG seven-pass G-type receptor  
1           JKAMP\_HUMAN JNK1/MAPK8-associated membrane protein  
2           ADA22\_HUMAN Disintegrin and metalloproteinase domain-conta  
5           FPRP\_HUMAN Prostaglandin F2 receptor negative regulator  
3           SUSD2\_HUMAN Sushi domain-containing protein 2  
2           PCYOX\_HUMAN Prenylcysteine oxidase 1  
5           TMEM2\_HUMAN Transmembrane protein 2  
1           S12A6\_HUMAN Solute carrier family 12 member 6  
1           SO3A1\_HUMAN Solute carrier organic anion transporter family n  
3           PLXA1\_HUMAN Plexin-A1  
1           GGT7\_HUMAN Gamma-glutamyltransferase 7  
1           TINAG\_HUMAN Isoform 2 of Tubulointerstitial nephritis antigen  
1           S39AA\_HUMAN Zinc transporter ZIP10  
1           HEG1\_HUMAN Protein HEG homolog 1  
1           NOTC3\_HUMAN Neurogenic locus notch homolog protein 3  
4           S6A14\_HUMAN Sodium- and chloride-dependent neutral and bas  
1           FZD1\_HUMAN Frizzled-1  
3           PLXD1\_HUMAN Plexin-D1  
4           HYOU1\_HUMAN Hypoxia up-regulated protein 1  
1           ENTP2\_HUMAN Ectonucleoside triphosphate diphosphohydrolas

|    |                                                    |
|----|----------------------------------------------------|
| 1  | ST14_HUMAN Suppressor of tumorigenicity 14 protein |
| 14 | NPTN_HUMAN Neuroplastin                            |
| 2  | S4A7_HUMAN Sodium bicarbonate cotransporter 3      |

membrane protein C1orf233

binding protein 10

chain

beta-1

1 molecule 5

orter member 1

or

r

ase family member 1

ber 6

a chain

ber 3

acting protein  
beta-3

ining protein 17  
teoglycan core protein

r

n 1

ining protein 15

pa

tidase-like protein 2

e 8

tein 4

n 1

otein 10

protein 1

ment 1

2  
n

1

aining protein 22

number 3A1

ic amino acid transporter B(0+)

e 2

**Table S6 - The Half-Lives of 216 Quantified**

| <b>Uniprot ID</b> | <b>Gene Symbol</b> | <b>Half-Life (h)</b> |
|-------------------|--------------------|----------------------|
| A8MWY0            | KIAA1324L          | 150.64               |
| O00592            | PODXL              | 16.66                |
| O14672            | ADAM10             | 21.55                |
| O14786            | NRP1               | 5.52                 |
| O15031            | PLXNB2             | 11.72                |
| O15230            | LAMA5              | 17.94                |
| O15394            | NCAM2              | 113.18               |
| O15455            | TLR3               | >200                 |
| O43157            | PLXNB1             | 13.34                |
| O43688            | PPAP2C             | 48.15                |
| O60487            | MPZL2              | 12.45                |
| O60637            | TSPAN3             | 11.02                |
| O60814            | HIST1H2BK          | >200                 |
| O60896            | RAMP3              | 17.05                |
| O75054            | IGSF3              | 16.49                |
| O75144            | ICOSLG             | 108.18               |
| O75882            | ATRN               | 49.95                |
| O75954            | TSPAN9             | 23.66                |
| O76082            | SLC22A5            | 30.88                |
| O95084            | PRSS23             | 17.00                |
| O95136            | S1PR2              | 29.24                |
| O95196            | CSPG5              | 19.88                |
| O95274            | LYPD3              | 5.57                 |
| O95297            | MPZL1              | 5.92                 |
| O95857            | TSPAN13            | 9.53                 |
| O95858            | TSPAN15            | 7.97                 |
| P01892            | HLA-A              | 18.24                |
| P02786            | TFRC               | 16.29                |
| P04156            | PRNP               | 13.87                |
| P04406            | GAPDH              | >200                 |
| P04626            | ERBB2              | >200                 |
| P05026            | ATP1B1             | 21.55                |
| P05362            | ICAM1              | 22.40                |
| P05556            | ITGB1              | 27.76                |
| P06213            | INSR               | 23.14                |
| P06280            | GLA                | >200                 |
| P06731            | CEACAM5            | 18.14                |
| P06756            | ITGAV              | 14.97                |
| P08069            | IGF1R              | 13.76                |
| P08174            | CD55               | >200                 |
| P08195            | SLC3A2             | 25.05                |

|        |          |        |
|--------|----------|--------|
| P08473 | MME      | 68.10  |
| P08648 | ITGA5    | 19.79  |
| P08962 | CD63     | 25.73  |
| P09758 | TACSTD2  | 21.29  |
| P10586 | PTPRF    | 5.55   |
| P10909 | CLU      | 11.79  |
| P11047 | LAMC1    | 7.44   |
| P11166 | SLC2A1   | 14.86  |
| P11279 | LAMP1    | 110.17 |
| P11717 | IGF2R    | 13.40  |
| P12821 | ACE      | >200   |
| P13473 | LAMP2    | >200   |
| P13987 | CD59     | 15.28  |
| P15260 | IFNGR1   | 3.35   |
| P16144 | ITGB4    | 21.76  |
| P16422 | EPCAM    | 12.51  |
| P17181 | IFNAR1   | 10.00  |
| P17301 | ITGA2    | 18.19  |
| P19256 | CD58     | 15.96  |
| P19438 | TNFRSF1A | 8.23   |
| P20645 | M6PR     | 128.98 |
| P21589 | NT5E     | 21.86  |
| P21802 | FGFR2    | 154.81 |
| P21860 | ERBB3    | 5.07   |
| P21926 | CD9      | 61.73  |
| P22223 | CDH3     | 3.02   |
| P22413 | ENPP1    | 20.08  |
| P23229 | ITGA6    | 24.83  |
| P25106 | ACKR3    | 2.66   |
| P25445 | FAS      | 33.06  |
| P26006 | ITGA3    | 39.22  |
| P26012 | ITGB8    | 7.12   |
| P29323 | EPHB2    | 19.04  |
| P30464 | HLA-B    | 7.42   |
| P30825 | SLC7A1   | 13.01  |
| P30988 | CALCR    | >200   |
| P32004 | L1CAM    | 15.57  |
| P35052 | GPC1     | 32.71  |
| P35613 | BSG      | 13.43  |
| P40189 | IL6ST    | 14.75  |
| P42892 | ECE1     | 21.88  |
| P48960 | CD97     | 9.91   |
| P50454 | SERPINH1 | 17.86  |
| P50895 | BCAM     | 6.66   |

|        |          |        |
|--------|----------|--------|
| P51795 | CLCN5    | 48.00  |
| P51805 | PLXNA3   | >200   |
| P52569 | SLC7A2   | 5.50   |
| P52797 | EFNA3    | 10.82  |
| P53801 | PTTG1IP  | 16.31  |
| P54709 | ATP1B3   | 57.59  |
| P55011 | SLC12A2  | 18.14  |
| P55268 | LAMB2    | 17.31  |
| P56159 | GFRA1    | 8.95   |
| P56749 | CLDN12   | 13.72  |
| P78504 | JAG1     | 5.59   |
| P78536 | ADAM17   | 110.05 |
| P78552 | IL13RA1  | 62.41  |
| P98160 | HSPG2    | >200   |
| Q02487 | DSC2     | 18.68  |
| Q03405 | PLAUR    | 17.75  |
| Q04721 | NOTCH2   | 42.57  |
| Q07954 | LRP1     | 15.91  |
| Q08174 | PCDH1    | 30.30  |
| Q08334 | IL10RB   | 5.67   |
| Q08722 | CD47     | 73.50  |
| Q12913 | PTPRJ    | 108.82 |
| Q13308 | PTK7     | 17.89  |
| Q13332 | PTPRS    | 15.91  |
| Q13433 | SLC39A6  | 8.74   |
| Q13444 | ADAM15   | 16.97  |
| Q13641 | TPBG     | 12.47  |
| Q13740 | ALCAM    | 17.67  |
| Q13813 | SPTAN1   | 42.04  |
| Q14118 | DAG1     | 21.02  |
| Q14126 | DSG2     | 9.70   |
| Q14542 | SLC29A2  | 23.13  |
| Q14956 | GPNMB    | >200   |
| Q15043 | SLC39A14 | >200   |
| Q15223 | PVRL1    | 19.83  |
| Q15262 | PTPRK    | 11.04  |
| Q15303 | ERBB4    | 10.95  |
| Q15758 | SLC1A5   | 17.25  |
| Q15768 | EFNB3    | 7.37   |
| Q15904 | ATP6AP1  | 63.40  |
| Q16563 | SYPL1    | >200   |
| Q29983 | MICA     | 32.18  |
| Q3MIR4 | TMEM30B  | 35.57  |
| Q3ZCQ3 | FAM174B  | 19.35  |

|        |          |        |
|--------|----------|--------|
| Q4KMQ2 | ANO6     | 106.38 |
| Q58DX5 | NAALADL2 | 15.11  |
| Q58EX2 | SDK2     | 24.69  |
| Q5MY95 | ENTPD8   | 58.53  |
| Q5VU97 | CACHD1   | 16.12  |
| Q5VW38 | GPR107   | 117.19 |
| Q5ZPR3 | CD276    | 19.46  |
| Q658P3 | STEAP3   | 20.07  |
| Q6EMK4 | VASN     | >200   |
| Q6H3X3 | RAET1G   | 13.72  |
| Q6P4Q7 | CNNM4    | 28.55  |
| Q6PCB8 | EMB      | 13.76  |
| Q6UXI9 | NPNT     | 9.83   |
| Q6YHK3 | CD109    | 9.08   |
| Q6ZMP0 | THSD4    | 8.93   |
| Q6ZUK4 | TMEM26   | 24.29  |
| Q7KYR7 | BTN2A1   | 25.45  |
| Q7Z5N4 | SDK1     | 13.65  |
| Q86SQ4 | GPR126   | 105.95 |
| Q86UF1 | TSPAN33  | 23.64  |
| Q8IWA5 | SLC44A2  | 45.60  |
| Q8IWT6 | LRRC8A   | 15.53  |
| Q8IWU5 | SULF2    | 6.72   |
| Q8N0Z9 | VSIG10   | 13.47  |
| Q8N271 | PROM2    | 23.39  |
| Q8N6C5 | IGSF1    | 152.98 |
| Q8N8Z6 | DCBLD1   | 11.42  |
| Q8NBN3 | TMEM87A  | 13.76  |
| Q8NC42 | RNF149   | >200   |
| Q8NE01 | CNNM3    | 8.72   |
| Q8NFZ8 | CADM4    | 23.78  |
| Q8TAB3 | PCDH19   | 9.30   |
| Q8TB96 | ITFG1    | 14.85  |
| Q8TCJ2 | STT3B    | 40.00  |
| Q8TCT8 | SPPL2A   | 48.79  |
| Q8WTV0 | SCARB1   | 10.00  |
| Q8WWI5 | SLC44A1  | >200   |
| Q8WWY8 | LIPH     | 12.79  |
| Q8WXI7 | MUC16    | 60.27  |
| Q92508 | PIEZO1   | 30.34  |
| Q92542 | NCSTN    | 104.02 |
| Q92823 | NRCAM    | 26.85  |
| Q92854 | SEMA4D   | 8.24   |
| Q96HA4 | C1orf159 | 23.40  |

|        |          |        |
|--------|----------|--------|
| Q96K49 | TMEM87B  | >200   |
| Q96NT5 | SLC46A1  | 24.60  |
| Q96QE2 | SLC2A13  | >200   |
| Q96RD7 | PANX1    | 125.85 |
| Q99523 | SORT1    | 7.51   |
| Q99571 | P2RX4    | 28.87  |
| Q9BRN9 | TM2D3    | >200   |
| Q9BTN0 | LRFN3    | 76.67  |
| Q9BZC7 | ABCA2    | 105.68 |
| Q9C0C4 | SEMA4C   | 14.99  |
| Q9H0U3 | MAGT1    | 18.33  |
| Q9H0X4 | ITFG3    | 15.52  |
| Q9H2X9 | SLC12A5  | 25.94  |
| Q9H6X2 | ANTXR1   | 17.81  |
| Q9H8M5 | CNNM2    | 13.74  |
| Q9HC56 | PCDH9    | 12.36  |
| Q9HC58 | SLC24A3  | >200   |
| Q9HCN3 | TMEM8A   | 31.04  |
| Q9HCU4 | CELSR2   | 9.12   |
| Q9HDC9 | APMAP    | 14.24  |
| Q9NPH3 | IL1RAP   | 16.14  |
| Q9NPR2 | SEMA4B   | 20.12  |
| Q9NV96 | TMEM30A  | 13.11  |
| Q9NYQ6 | CELSR1   | 8.42   |
| Q9NZU0 | FLRT3    | 105.95 |
| Q9P055 | JKAMP    | 7.65   |
| Q9P2B2 | PTGFRN   | 9.41   |
| Q9UGT4 | SUSD2    | 38.10  |
| Q9UHG3 | PCYOX1   | 21.61  |
| Q9UHN6 | TMEM2    | 15.44  |
| Q9UHW9 | SLC12A6  | 27.75  |
| Q9UIG8 | SLCO3A1  | 10.04  |
| Q9UIW2 | PLXNA1   | 7.12   |
| Q9ULF5 | SLC39A10 | 57.82  |
| Q9UM47 | NOTCH3   | 7.18   |
| Q9UN76 | SLC6A14  | 21.25  |
| Q9Y4D7 | PLXND1   | 14.79  |
| Q9Y4L1 | HYOU1    | 10.77  |
| Q9Y5L3 | ENTPD2   | 8.99   |
| Q9Y5Y6 | ST14     | 9.81   |
| Q9Y639 | NPTN     | 30.75  |
| Q9Y653 | GPR56    | 3.60   |
| Q9Y6M7 | SLC4A7   | 20.55  |

## 1 Cell-Surface N-Glycoproteins in Expt# 2

| Unique Glycopeptide Hits | Annotation                                               |
|--------------------------|----------------------------------------------------------|
| 1                        | K132L_HUMAN UPF0577 protein KIAA1324-like                |
| 1                        | PODXL_HUMAN Podocalyxin                                  |
| 2                        | ADA10_HUMAN Disintegrin and metalloproteinase domain-    |
| 2                        | NRP1_HUMAN Neuropilin-1                                  |
| 9                        | PLXB2_HUMAN Plexin-B2                                    |
| 3                        | LAMA5_HUMAN Laminin subunit alpha-5                      |
| 7                        | NCAM2_HUMAN Neural cell adhesion molecule 2              |
| 1                        | TLR3_HUMAN Toll-like receptor 3                          |
| 1                        | PLXB1_HUMAN Plexin-B1                                    |
| 1                        | LPP2_HUMAN Lipid phosphate phosphohydrolase 2            |
| 1                        | MPZL2_HUMAN Myelin protein zero-like protein 2           |
| 2                        | TSN3_HUMAN Tetraspanin-3                                 |
| 1                        | H2B1K_HUMAN Histone H2B type 1-K                         |
| 1                        | RAMP3_HUMAN Receptor activity-modifying protein 3        |
| 6                        | IGSF3_HUMAN Immunoglobulin superfamily member 3          |
| 2                        | ICOSL_HUMAN ICOS ligand                                  |
| 3                        | ATRN_HUMAN Attractin                                     |
| 2                        | TSN9_HUMAN Tetraspanin-9                                 |
| 2                        | S22A5_HUMAN Solute carrier family 22 member 5            |
| 3                        | PRS23_HUMAN Serine protease 23                           |
| 1                        | S1PR2_HUMAN Sphingosine 1-phosphate receptor 2           |
| 1                        | CSPG5_HUMAN Chondroitin sulfate proteoglycan 5           |
| 4                        | LYPD3_HUMAN Ly6/PLAUR domain-containing protein 3        |
| 1                        | MPZL1_HUMAN Myelin protein zero-like protein 1           |
| 1                        | TSN13_HUMAN Tetraspanin-13                               |
| 2                        | TSN15_HUMAN Tetraspanin-15                               |
| 1                        | 1A02_HUMAN HLA class I histocompatibility antigen, A-2 a |
| 4                        | TFR1_HUMAN Transferrin receptor protein 1                |
| 2                        | PRIO_HUMAN Major prion protein                           |
| 2                        | G3P_HUMAN Glyceraldehyde-3-phosphate dehydrogenase       |
| 1                        | ERBB2_HUMAN Receptor tyrosine-protein kinase erbB-2      |
| 5                        | AT1B1_HUMAN Sodium/potassium-transporting ATPase sul     |
| 3                        | ICAM1_HUMAN Intercellular adhesion molecule 1            |
| 11                       | ITB1_HUMAN Integrin beta-1                               |
| 1                        | INSR_HUMAN Insulin receptor                              |
| 1                        | AGAL_HUMAN Alpha-galactosidase A                         |
| 8                        | CEAM5_HUMAN Carcinoembryonic antigen-related cell adh    |
| 8                        | ITAV_HUMAN Integrin alpha-V                              |
| 12                       | IGF1R_HUMAN Insulin-like growth factor 1 receptor        |
| 2                        | DAF_HUMAN Complement decay-accelerating factor           |
| 4                        | 4F2_HUMAN 4F2 cell-surface antigen heavy chain           |

2 NEP\_HUMAN Nephilysin  
4 ITA5\_HUMAN Integrin alpha-5  
1 CD63\_HUMAN CD63 antigen  
7 TACD2\_HUMAN Tumor-associated calcium signal transduce  
1 PTPRF\_HUMAN Receptor-type tyrosine-protein phosphatase  
1 CLUS\_HUMAN Clusterin  
4 LAMC1\_HUMAN Laminin subunit gamma-1  
1 GTR1\_HUMAN Solute carrier family 2, facilitated glucose tra  
5 LAMP1\_HUMAN Lysosome-associated membrane glycoprot  
2 MPRI\_HUMAN Cation-independent mannose-6-phosphate re  
2 ACE\_HUMAN Angiotensin-converting enzyme  
6 LAMP2\_HUMAN Lysosome-associated membrane glycoprot  
1 CD59\_HUMAN CD59 glycoprotein  
1 INGR1\_HUMAN Interferon gamma receptor 1  
1 ITB4\_HUMAN Integrin beta-4  
4 EPCAM\_HUMAN Epithelial cell adhesion molecule  
2 INAR1\_HUMAN Interferon alpha/beta receptor 1  
4 ITA2\_HUMAN Integrin alpha-2  
2 LFA3\_HUMAN Lymphocyte function-associated antigen 3  
1 TNF1A\_HUMAN Tumor necrosis factor receptor superfamily  
2 MPRD\_HUMAN Cation-dependent mannose-6-phosphate rec  
2 5NTD\_HUMAN 5'-nucleotidase  
1 FGFR2\_HUMAN Fibroblast growth factor receptor 2  
3 ERBB3\_HUMAN Receptor tyrosine-protein kinase erbB-3  
1 CD9\_HUMAN CD9 antigen  
1 CADH3\_HUMAN Cadherin-3  
5 ENPP1\_HUMAN Ectonucleotide pyrophosphatase/phosphodi  
1 ITA6\_HUMAN Integrin alpha-6  
1 ACKR3\_HUMAN Atypical chemokine receptor 3  
2 TNF6\_HUMAN Tumor necrosis factor receptor superfamily 1  
8 ITA3\_HUMAN Integrin alpha-3  
1 ITB8\_HUMAN Integrin beta-8  
1 EPHB2\_HUMAN Ephrin type-B receptor 2  
1 1B15\_HUMAN HLA class I histocompatibility antigen, B-15  
2 CTR1\_HUMAN High affinity cationic amino acid transporter  
2 CALCR\_HUMAN Calcitonin receptor  
3 L1CAM\_HUMAN Neural cell adhesion molecule L1  
1 GPC1\_HUMAN Glypican-1  
6 BASI\_HUMAN Basigin  
2 IL6RB\_HUMAN Interleukin-6 receptor subunit beta  
12 ECE1\_HUMAN Endothelin-converting enzyme 1  
4 CD97\_HUMAN CD97 antigen  
1 SERPH\_HUMAN Serpin H1  
1 BCAM\_HUMAN Basal cell adhesion molecule

1 CLCN5\_HUMAN H(+)/Cl(-) exchange transporter 5  
1 PLXA3\_HUMAN Plexin-A3  
1 CTR2\_HUMAN Low affinity cationic amino acid transporter  
1 EFNA3\_HUMAN Ephrin-A3  
1 PTTG\_HUMAN Pituitary tumor-transforming gene 1 protein-  
4 AT1B3\_HUMAN Sodium/potassium-transporting ATPase sul  
1 S12A2\_HUMAN Solute carrier family 12 member 2  
2 LAMB2\_HUMAN Laminin subunit beta-2  
4 GFRA1\_HUMAN GDNF family receptor alpha-1  
1 CLD12\_HUMAN Claudin-12  
1 JAG1\_HUMAN Protein jagged-1  
4 ADA17\_HUMAN Disintegrin and metalloproteinase domain-  
1 I13R1\_HUMAN Interleukin-13 receptor subunit alpha-1  
1 PGBM\_HUMAN Basement membrane-specific heparan sulfat  
2 DSC2\_HUMAN Desmocollin-2  
1 UPAR\_HUMAN Urokinase plasminogen activator surface rec  
2 NOTC2\_HUMAN Neurogenic locus notch homolog protein 2  
3 LRP1\_HUMAN Prolow-density lipoprotein receptor-related p  
1 PCDH1\_HUMAN Protocadherin-1  
2 I10R2\_HUMAN Interleukin-10 receptor subunit beta  
5 CD47\_HUMAN Leukocyte surface antigen CD47  
5 PTPRJ\_HUMAN Receptor-type tyrosine-protein phosphatase  
3 PTK7\_HUMAN Inactive tyrosine-protein kinase 7  
1 PTPRS\_HUMAN Receptor-type tyrosine-protein phosphatase  
4 S39A6\_HUMAN Zinc transporter ZIP6  
4 ADA15\_HUMAN Disintegrin and metalloproteinase domain-  
5 TPBG\_HUMAN Trophoblast glycoprotein  
15 CD166\_HUMAN CD166 antigen  
1 SPTN1\_HUMAN Spectrin alpha chain, non-erythrocytic 1  
2 DAG1\_HUMAN Dystroglycan  
3 DSG2\_HUMAN Desmoglein-2  
1 S29A2\_HUMAN Equilibrative nucleoside transporter 2  
1 GPNMB\_HUMAN Transmembrane glycoprotein NMB  
1 S39AE\_HUMAN Zinc transporter ZIP14  
5 PVRL1\_HUMAN Poliovirus receptor-related protein 1  
2 PTPRK\_HUMAN Receptor-type tyrosine-protein phosphatase  
2 ERBB4\_HUMAN Receptor tyrosine-protein kinase erbB-4  
2 AAAT\_HUMAN Neutral amino acid transporter B(0)  
1 EFNB3\_HUMAN Ephrin-B3  
1 VAS1\_HUMAN V-type proton ATPase subunit S1  
1 SYPL1\_HUMAN Synaptophysin-like protein 1  
5 MICA\_HUMAN MHC class I polypeptide-related sequence A  
4 CC50B\_HUMAN Cell cycle control protein 50B  
1 F174B\_HUMAN Membrane protein FAM174B

2 ANO6\_HUMAN Anoctamin-6  
2 NADL2\_HUMAN Inactive N-acetylated-alpha-linked acidic c  
2 SDK2\_HUMAN Protein sidekick-2  
1 ENTP8\_HUMAN Ectonucleoside triphosphate diphosphohyd  
1 CAHD1\_HUMAN VWFA and cache domain-containing prote  
1 GP107\_HUMAN Protein GPR107  
4 CD276\_HUMAN CD276 antigen  
1 STEA3\_HUMAN Metalloreductase STEAP3  
1 VASN\_HUMAN Vasorin  
1 RET1G\_HUMAN Retinoic acid early transcript 1G protein  
2 CNNM4\_HUMAN Metal transporter CNNM4  
2 EMB\_HUMAN Embigin  
1 NPNT\_HUMAN Nephronectin  
2 CD109\_HUMAN CD109 antigen  
1 THSD4\_HUMAN Thrombospondin type-1 domain-containing  
1 TMM26\_HUMAN Transmembrane protein 26  
1 BT2A1\_HUMAN Butyrophilin subfamily 2 member A1  
2 SDK1\_HUMAN Protein sidekick-1  
2 GP126\_HUMAN G-protein coupled receptor 126  
1 TSN33\_HUMAN Tetraspanin-33  
4 CTL2\_HUMAN Choline transporter-like protein 2  
1 LRC8A\_HUMAN Leucine-rich repeat-containing protein 8A  
2 SULF2\_HUMAN Extracellular sulfatase Sulf-2  
1 VSI10\_HUMAN V-set and immunoglobulin domain-containi  
1 PROM2\_HUMAN Prominin-2  
1 IGSF1\_HUMAN Immunoglobulin superfamily member 1  
1 DCBD1\_HUMAN Discoidin, CUB and LCCL domain-contain  
1 TM87A\_HUMAN Transmembrane protein 87A  
1 RN149\_HUMAN E3 ubiquitin-protein ligase RNF149  
1 CNNM3\_HUMAN Metal transporter CNNM3  
3 CADM4\_HUMAN Cell adhesion molecule 4  
1 PCD19\_HUMAN Protocadherin-19  
1 TIP\_HUMAN T-cell immunomodulatory protein  
1 STT3B\_HUMAN Dolichyl-diphosphooligosaccharide--protei  
2 SPP2A\_HUMAN Signal peptide peptidase-like 2A  
1 SCRB1\_HUMAN Scavenger receptor class B member 1  
1 CTL1\_HUMAN Choline transporter-like protein 1  
1 LIPH\_HUMAN Lipase member H  
1 MUC16\_HUMAN Mucin-16  
4 PIEZ1\_HUMAN Piezo-type mechanosensitive ion channel co  
5 NICA\_HUMAN Nicastrin  
4 NRCAM\_HUMAN Neuronal cell adhesion molecule  
1 SEM4D\_HUMAN Semaphorin-4D  
2 CA159\_HUMAN Uncharacterized protein C1orf159

1 TM87B\_HUMAN Transmembrane protein 87B  
1 PCFT\_HUMAN Proton-coupled folate transporter  
1 MYCT\_HUMAN Proton myo-inositol cotransporter  
1 PANX1\_HUMAN Pannexin-1  
1 SORT\_HUMAN Sortilin  
1 P2RX4\_HUMAN P2X purinoceptor 4  
1 TM2D3\_HUMAN TM2 domain-containing protein 3  
1 LRFN3\_HUMAN Leucine-rich repeat and fibronectin type-III  
1 ABCA2\_HUMAN ATP-binding cassette sub-family A membe  
5 SEM4C\_HUMAN Semaphorin-4C  
1 MAGT1\_HUMAN Magnesium transporter protein 1  
3 ITFG3\_HUMAN Protein ITFG3  
3 S12A5\_HUMAN Solute carrier family 12 member 5  
1 ANTR1\_HUMAN Anthrax toxin receptor 1  
1 CNNM2\_HUMAN Metal transporter CNNM2  
1 PCDH9\_HUMAN Protocadherin-9  
1 NCKX3\_HUMAN Sodium/potassium/calcium exchanger 3  
1 TMM8A\_HUMAN Transmembrane protein 8A  
11 CELR2\_HUMAN Cadherin EGF LAG seven-pass G-type rec  
1 APMAP\_HUMAN Adipocyte plasma membrane-associated p  
2 IL1AP\_HUMAN Interleukin-1 receptor accessory protein  
1 SEM4B\_HUMAN Semaphorin-4B  
1 CC50A\_HUMAN Cell cycle control protein 50A  
4 CELR1\_HUMAN Cadherin EGF LAG seven-pass G-type rec  
1 FLRT3\_HUMAN Leucine-rich repeat transmembrane protein  
1 JKAMP\_HUMAN JNK1/MAPK8-associated membrane prote  
5 FPRP\_HUMAN Prostaglandin F2 receptor negative regulator  
3 SUSD2\_HUMAN Sushi domain-containing protein 2  
4 PCYOX\_HUMAN Prenylcysteine oxidase 1  
4 TMEM2\_HUMAN Transmembrane protein 2  
1 S12A6\_HUMAN Solute carrier family 12 member 6  
1 SO3A1\_HUMAN Solute carrier organic anion transporter far  
2 PLXA1\_HUMAN Plexin-A1  
1 S39AA\_HUMAN Zinc transporter ZIP10  
1 NOTC3\_HUMAN Neurogenic locus notch homolog protein 3  
4 S6A14\_HUMAN Sodium- and chloride-dependent neutral anc  
3 PLXD1\_HUMAN Plexin-D1  
4 HYOU1\_HUMAN Hypoxia up-regulated protein 1  
3 ENTP2\_HUMAN Ectonucleoside triphosphate diphosphohyd  
1 ST14\_HUMAN Suppressor of tumorigenicity 14 protein  
13 NPTN\_HUMAN Neuroplastin  
1 GPR56\_HUMAN G-protein coupled receptor 56  
2 S4A7\_HUMAN Sodium bicarbonate cotransporter 3

containing protein 10

alpha chain

unit beta-1

resion molecule 5

er 2

.F

ansporter member 1

ein 1

ceptor

ein 2

γ member 1A

ceptor

esterase family member 1

member 6

alpha chain

1

2

interacting protein  
subunit beta-3

containing protein 17

te proteoglycan core protein

ceptor

rotein 1

eta

S

containing protein 15

κ kappa

λ

lipase-like protein 2

lipase 8

lipase 1

lipase protein 4

lipase protein 10

lipase protein 1

lipase glycosyltransferase subunit STT3B

lipase component 1

[ domain-containing protein 3  
er 2

eptor 2  
rotein

eptor 1  
FLRT3  
:in

ily member 3A1

d basic amino acid transporter B(0+)

rolase 2

**Table S7 - Unique N-Glycosylation Sites (54**

| <b>Uniprot ID</b> | <b>Gene Symbol</b> | <b>Site</b> | <b>ModScore</b> |
|-------------------|--------------------|-------------|-----------------|
| A1A5B4            | ANO9               | 641         | 1000            |
| A8MVW0            | FAM171A2           | 66          | 1000            |
| A8MWY0            | KIAA1324L          | 560         | 1000            |
| F2Z333            | C1orf233           | 109         | 1000            |
| O00592            | PODXL              | 360         | 11.02           |
| O14494            | PPAP2A             | 142         | 1000            |
| O14497            | ARID1A             | 1308        | 0.52            |
| O14497            | ARID1A             | 1313        | 0.50            |
| O14672            | ADAM10             | 439         | 1000            |
| O14672            | ADAM10             | 551         | 8.59            |
| O14786            | NRP1               | 150         | 1000            |
| O14786            | NRP1               | 522         | 24.44           |
| O15031            | PLXNB2             | 127         | 1000            |
| O15031            | PLXNB2             | 391         | 126.31          |
| O15031            | PLXNB2             | 401         | 6.59            |
| O15031            | PLXNB2             | 402         | 17.01           |
| O15031            | PLXNB2             | 528         | 1000            |
| O15031            | PLXNB2             | 733         | 1000            |
| O15031            | PLXNB2             | 844         | 1000            |
| O15031            | PLXNB2             | 1049        | 1000            |
| O15230            | LAMA5              | 2196        | 1000            |
| O15230            | LAMA5              | 2423        | 1000            |
| O15230            | LAMA5              | 3107        | 1000            |
| O15393            | TMPRSS2            | 213         | 22.49           |
| O15394            | NCAM2              | 219         | 1000            |
| O15394            | NCAM2              | 474         | 39.66           |
| O15394            | NCAM2              | 562         | 18.81           |
| O15455            | TLR3               | 507         | 8.91            |
| O15455            | TLR3               | 517         | 6.59            |
| O15455            | TLR3               | 520         | 1.60            |
| O43157            | PLXNB1             | 1253        | 1000            |
| O43194            | GPR39              | 192         | 1000            |
| O43688            | PPAP2C             | 139         | 1000            |
| O60487            | MPZL2              | 39          | 1000            |
| O60603            | TLR2               | 414         | 73.31           |
| O60637            | TSPAN3             | 127         | 37.54           |
| O60637            | TSPAN3             | 167         | 1000            |
| O60814            | HIST1H2BK          | 64          | 20.17           |
| O60896            | RAMP3              | 103         | 1000            |
| O75054            | IGSF3              | 101         | 1000            |

|        |          |      |       |
|--------|----------|------|-------|
| O75054 | IGSF3    | 655  | 24.44 |
| O75054 | IGSF3    | 700  | 52.73 |
| O75054 | IGSF3    | 825  | 1000  |
| O75054 | IGSF3    | 842  | 1000  |
| O75054 | IGSF3    | 961  | 1000  |
| O75144 | ICOSLG   | 70   | 22.49 |
| O75144 | ICOSLG   | 102  | 1000  |
| O75882 | ATRN     | 914  | 16.96 |
| O75882 | ATRN     | 923  | 29.97 |
| O75882 | ATRN     | 1073 | 1000  |
| O75882 | ATRN     | 1082 | 1000  |
| O75954 | TSPAN9   | 180  | 1000  |
| O75976 | CPD      | 626  | 13.38 |
| O76082 | SLC22A5  | 57   | 1000  |
| O76082 | SLC22A5  | 91   | 1000  |
| O94805 | ACTL6B   | 159  | 1000  |
| O95084 | PRSS23   | 207  | 1000  |
| O95136 | S1PR2    | 19   | 1000  |
| O95185 | UNC5C    | 236  | 1000  |
| O95196 | CSPG5    | 355  | 1000  |
| O95274 | LYPD3    | 118  | 1000  |
| O95274 | LYPD3    | 163  | 1000  |
| O95274 | LYPD3    | 176  | 1000  |
| O95274 | LYPD3    | 183  | 1000  |
| O95274 | LYPD3    | 227  | 39.66 |
| O95297 | MPZL1    | 50   | 1000  |
| O95857 | TSPAN13  | 137  | 17.01 |
| O95858 | TSPAN15  | 189  | 71.75 |
| P01892 | HLA-A    | 110  | 1000  |
| P02786 | TFRC     | 251  | 1000  |
| P02786 | TFRC     | 722  | 9.34  |
| P02786 | TFRC     | 723  | 24.44 |
| P02786 | TFRC     | 727  | 84.61 |
| P04156 | PRNP     | 197  | 1000  |
| P04406 | GAPDH    | 9    | 1000  |
| P04406 | GAPDH    | 225  | 1000  |
| P04626 | ERBB2    | 530  | 1000  |
| P04626 | ERBB2    | 571  | 1000  |
| P04626 | ERBB2    | 629  | 1000  |
| P05026 | ATP1B1   | 158  | 71.95 |
| P05026 | ATP1B1   | 193  | 1000  |
| P05026 | ATP1B1   | 265  | 1000  |
| P05120 | SERPINB2 | 115  | 4.55  |

|        |         |     |        |
|--------|---------|-----|--------|
| P05362 | ICAM1   | 145 | 1000   |
| P05362 | ICAM1   | 267 | 78.16  |
| P05556 | ITGB1   | 205 | 6.60   |
| P05556 | ITGB1   | 212 | 67.17  |
| P05556 | ITGB1   | 406 | 73.31  |
| P05556 | ITGB1   | 411 | 132.11 |
| P05556 | ITGB1   | 481 | 1000   |
| P05556 | ITGB1   | 520 | 107.32 |
| P05556 | ITGB1   | 527 | 0.00   |
| P05556 | ITGB1   | 669 | 1000   |
| P06213 | INSR    | 920 | 1000   |
| P06280 | GLA     | 215 | 1000   |
| P06731 | CEACAM5 | 152 | 13.38  |
| P06731 | CEACAM5 | 195 | 1000   |
| P06731 | CEACAM5 | 197 | 1000   |
| P06731 | CEACAM5 | 204 | 1000   |
| P06731 | CEACAM5 | 246 | 75.74  |
| P06731 | CEACAM5 | 375 | 48.87  |
| P06731 | CEACAM5 | 508 | 27.06  |
| P06731 | CEACAM5 | 580 | 9.30   |
| P06731 | CEACAM5 | 650 | 7.71   |
| P06731 | CEACAM5 | 659 | 3.49   |
| P06731 | CEACAM5 | 665 | 24.44  |
| P06756 | ITGAV   | 74  | 1000   |
| P06756 | ITGAV   | 554 | 1000   |
| P06756 | ITGAV   | 704 | 1000   |
| P06756 | ITGAV   | 874 | 1000   |
| P06756 | ITGAV   | 945 | 11.02  |
| P07339 | CTSD    | 263 | 1000   |
| P07602 | PSAP    | 101 | 1000   |
| P08069 | IGF1R   | 244 | 66.98  |
| P08069 | IGF1R   | 314 | 1000   |
| P08069 | IGF1R   | 607 | 1000   |
| P08069 | IGF1R   | 622 | 1000   |
| P08069 | IGF1R   | 638 | 57.71  |
| P08069 | IGF1R   | 640 | 58.55  |
| P08069 | IGF1R   | 747 | 1000   |
| P08069 | IGF1R   | 756 | 1000   |
| P08069 | IGF1R   | 764 | 1000   |
| P08069 | IGF1R   | 900 | 53.53  |
| P08069 | IGF1R   | 913 | 1000   |
| P08174 | CD55    | 95  | 1000   |
| P08195 | SLC3A2  | 365 | 1000   |

|        |         |      |        |
|--------|---------|------|--------|
| P08195 | SLC3A2  | 381  | 128.04 |
| P08195 | SLC3A2  | 424  | 44.28  |
| P08195 | SLC3A2  | 428  | 2.19   |
| P08473 | MME     | 145  | 1000   |
| P08473 | MME     | 285  | 38.18  |
| P08648 | ITGA5   | 297  | 1000   |
| P08648 | ITGA5   | 307  | 1000   |
| P08648 | ITGA5   | 593  | 1000   |
| P08648 | ITGA5   | 773  | 24.44  |
| P08648 | ITGA5   | 868  | 27.12  |
| P08962 | CD63    | 130  | 9.34   |
| P09603 | CSF1    | 154  | 13.38  |
| P09758 | TACSTD2 | 120  | 70.91  |
| P09758 | TACSTD2 | 168  | 1000   |
| P09758 | TACSTD2 | 208  | 1000   |
| P10586 | PTPRF   | 966  | 64.40  |
| P10909 | CLU     | 86   | 1000   |
| P10909 | CLU     | 291  | 1000   |
| P11047 | LAMC1   | 1022 | 25.17  |
| P11047 | LAMC1   | 1107 | 24.44  |
| P11047 | LAMC1   | 1380 | 44.28  |
| P11047 | LAMC1   | 1395 | 29.67  |
| P11047 | LAMC1   | 1439 | 1000   |
| P11166 | SLC2A1  | 45   | 1000   |
| P11279 | LAMP1   | 62   | 1000   |
| P11279 | LAMP1   | 76   | 1000   |
| P11279 | LAMP1   | 84   | 1000   |
| P11279 | LAMP1   | 103  | 1000   |
| P11279 | LAMP1   | 249  | 1000   |
| P11279 | LAMP1   | 307  | 1000   |
| P11362 | FGFR1   | 317  | 1000   |
| P11717 | IGF2R   | 400  | 1000   |
| P11717 | IGF2R   | 2085 | 1000   |
| P12821 | ACE     | 146  | 97.60  |
| P12821 | ACE     | 695  | 39.66  |
| P13473 | LAMP2   | 49   | 1000   |
| P13473 | LAMP2   | 58   | 1000   |
| P13473 | LAMP2   | 101  | 1000   |
| P13473 | LAMP2   | 275  | 1000   |
| P13473 | LAMP2   | 356  | 1000   |
| P13987 | CD59    | 43   | 1000   |
| P15151 | PVR     | 105  | 1000   |
| P15260 | IFNGR1  | 179  | 1000   |

|        |          |      |        |
|--------|----------|------|--------|
| P16070 | CD44     | 57   | 1000   |
| P16144 | ITGB4    | 695  | 1000   |
| P16422 | EPCAM    | 74   | 1000   |
| P16422 | EPCAM    | 111  | 53.71  |
| P16422 | EPCAM    | 198  | 0.60   |
| P17181 | IFNAR1   | 81   | 1000   |
| P17181 | IFNAR1   | 172  | 1000   |
| P17301 | ITGA2    | 105  | 65.26  |
| P17301 | ITGA2    | 343  | 1000   |
| P17301 | ITGA2    | 460  | 35.80  |
| P17301 | ITGA2    | 471  | 2.02   |
| P17301 | ITGA2    | 475  | 4.09   |
| P17301 | ITGA2    | 1057 | 1000   |
| P17301 | ITGA2    | 1074 | 1000   |
| P18084 | ITGB5    | 586  | 4.09   |
| P18564 | ITGB6    | 463  | 1000   |
| P19256 | CD58     | 169  | 1000   |
| P19438 | TNFRSF1A | 54   | 6.59   |
| P20645 | M6PR     | 57   | 1000   |
| P20645 | M6PR     | 83   | 106.40 |
| P21589 | NT5E     | 53   | 1000   |
| P21589 | NT5E     | 333  | 1000   |
| P21802 | FGFR2    | 83   | 0.00   |
| P21860 | ERBB3    | 437  | 48.87  |
| P21860 | ERBB3    | 522  | 1000   |
| P21860 | ERBB3    | 616  | 5.07   |
| P21926 | CD9      | 151  | 1000   |
| P22223 | CDH3     | 566  | 1000   |
| P22413 | ENPP1    | 285  | 1000   |
| P22413 | ENPP1    | 341  | 1000   |
| P22413 | ENPP1    | 477  | 16.27  |
| P23229 | ITGA6    | 770  | 12.09  |
| P23229 | ITGA6    | 966  | 47.05  |
| P25106 | ACKR3    | 192  | 9.34   |
| P25445 | FAS      | 118  | 1000   |
| P25445 | FAS      | 136  | 36.70  |
| P26006 | ITGA3    | 107  | 1000   |
| P26006 | ITGA3    | 265  | 1000   |
| P26006 | ITGA3    | 511  | 1000   |
| P26006 | ITGA3    | 656  | 24.24  |
| P26006 | ITGA3    | 969  | 37.54  |
| P26012 | ITGB8    | 466  | 50.81  |
| P27701 | CD82     | 198  | 1000   |

|        |          |     |        |
|--------|----------|-----|--------|
| P27824 | CANX     | 156 | 2.19   |
| P29323 | EPHB2    | 482 | 1000   |
| P30464 | HLA-B    | 110 | 1000   |
| P30825 | SLC7A1   | 226 | 142.63 |
| P30825 | SLC7A1   | 235 | 24.44  |
| P30988 | CALCR    | 91  | 1000   |
| P32004 | L1CAM    | 294 | 20.17  |
| P32004 | L1CAM    | 671 | 1000   |
| P32004 | L1CAM    | 849 | 1000   |
| P35052 | GPC1     | 116 | 1000   |
| P35613 | BSG      | 160 | 1000   |
| P35613 | BSG      | 268 | 1000   |
| P35613 | BSG      | 302 | 1000   |
| P36941 | LTBR     | 177 | 1000   |
| P40189 | IL6ST    | 83  | 1000   |
| P40189 | IL6ST    | 131 | 104.48 |
| P40189 | IL6ST    | 379 | 1000   |
| P40189 | IL6ST    | 383 | 1000   |
| P42892 | ECE1     | 166 | 1000   |
| P42892 | ECE1     | 187 | 1000   |
| P42892 | ECE1     | 210 | 1000   |
| P42892 | ECE1     | 249 | 17.01  |
| P42892 | ECE1     | 270 | 1000   |
| P42892 | ECE1     | 539 | 1000   |
| P42892 | ECE1     | 632 | 1000   |
| P42892 | ECE1     | 651 | 40.36  |
| P42892 | ECE1     | 660 | 15.01  |
| P48509 | CD151    | 159 | 5.09   |
| P48509 | CD151    | 160 | 6.59   |
| P48960 | CD97     | 38  | 9.39   |
| P48960 | CD97     | 108 | 38.37  |
| P48960 | CD97     | 371 | 1000   |
| P50454 | SERPINH1 | 120 | 1000   |
| P50895 | BCAM     | 439 | 1000   |
| P51795 | CLCN5    | 405 | 7.97   |
| P51795 | CLCN5    | 408 | 33.66  |
| P51805 | PLXNA3   | 59  | 1000   |
| P52569 | SLC7A2   | 227 | 1000   |
| P52797 | EFNA3    | 100 | 1000   |
| P53801 | PTTG1IP  | 54  | 78.16  |
| P54709 | ATP1B3   | 124 | 1000   |
| P54709 | ATP1B3   | 240 | 7.71   |
| P55011 | SLC12A2  | 553 | 24.44  |

|        |         |      |        |
|--------|---------|------|--------|
| P55011 | SLC12A2 | 562  | 51.57  |
| P55268 | LAMB2   | 1249 | 1000   |
| P55268 | LAMB2   | 1348 | 119.27 |
| P55316 | FOXG1   | 232  | 0.16   |
| P56159 | GFRA1   | 59   | 1000   |
| P56159 | GFRA1   | 152  | 24.44  |
| P56159 | GFRA1   | 406  | 20.99  |
| P56749 | CLDN12  | 47   | 1000   |
| P78504 | JAG1    | 217  | 20.17  |
| P78536 | ADAM17  | 103  | 1000   |
| P78536 | ADAM17  | 452  | 1000   |
| P78536 | ADAM17  | 539  | 1000   |
| P78536 | ADAM17  | 594  | 2.02   |
| P78536 | ADAM17  | 598  | 2.02   |
| P78552 | IL13RA1 | 157  | 13.38  |
| P98160 | HSPG2   | 89   | 1000   |
| Q02487 | DSC2    | 392  | 1000   |
| Q02487 | DSC2    | 629  | 1000   |
| Q03405 | PLAUR   | 194  | 1000   |
| Q04721 | NOTCH2  | 46   | 32.22  |
| Q07954 | LRP1    | 357  | 1000   |
| Q07954 | LRP1    | 2521 | 1000   |
| Q07954 | LRP1    | 3333 | 1000   |
| Q07954 | LRP1    | 4364 | 1000   |
| Q08174 | PCDH1   | 305  | 26.89  |
| Q08334 | IL10RB  | 49   | 1000   |
| Q08334 | IL10RB  | 161  | 1000   |
| Q08722 | CD47    | 73   | 1000   |
| Q08722 | CD47    | 111  | 1000   |
| Q12913 | PTPRJ   | 231  | 6.59   |
| Q12913 | PTPRJ   | 342  | 1000   |
| Q12913 | PTPRJ   | 351  | 1000   |
| Q12913 | PTPRJ   | 391  | 1000   |
| Q12913 | PTPRJ   | 396  | 1000   |
| Q12913 | PTPRJ   | 413  | 4.09   |
| Q12913 | PTPRJ   | 525  | 1000   |
| Q12999 | TSPAN31 | 109  | 1000   |
| Q12999 | TSPAN31 | 117  | 1000   |
| Q13308 | PTK7    | 116  | 97.75  |
| Q13308 | PTK7    | 283  | 1000   |
| Q13308 | PTK7    | 405  | 1000   |
| Q13308 | PTK7    | 567  | 1000   |
| Q13308 | PTK7    | 574  | 1000   |

|          |          |      |        |
|----------|----------|------|--------|
| Q13332   | PTPRS    | 733  | 1000   |
| Q13433   | SLC39A6  | 67   | 17.01  |
| Q13433   | SLC39A6  | 241  | 1000   |
| Q13433   | SLC39A6  | 266  | 12.79  |
| Q13433   | SLC39A6  | 283  | 2.02   |
| Q13443   | ADAM9    | 381  | 1000   |
| Q13444   | ADAM15   | 237  | 1000   |
| Q13444   | ADAM15   | 389  | 1000   |
| Q13444   | ADAM15   | 392  | 1000   |
| Q13641   | TPBG     | 81   | 1000   |
| Q13641   | TPBG     | 166  | 20.35  |
| Q13641   | TPBG     | 181  | 0.00   |
| Q13641   | TPBG     | 192  | 18.96  |
| Q13641   | TPBG     | 256  | 132.25 |
| Q13641   | TPBG     | 275  | 1000   |
| Q13740   | ALCAM    | 95   | 76.73  |
| Q13740   | ALCAM    | 167  | 1000   |
| Q13740   | ALCAM    | 265  | 1000   |
| Q13740   | ALCAM    | 306  | 1000   |
| Q13740   | ALCAM    | 361  | 1000   |
| Q13740   | ALCAM    | 480  | 109.94 |
| Q13740-2 | ALCAM    | 499  | 76.73  |
| Q13813   | SPTAN1   | 1356 | 1000   |
| Q14118   | DAG1     | 641  | 1000   |
| Q14118   | DAG1     | 649  | 1000   |
| Q14126   | DSG2     | 112  | 1000   |
| Q14126   | DSG2     | 182  | 84.61  |
| Q14126   | DSG2     | 462  | 1000   |
| Q14542   | SLC29A2  | 48   | 1000   |
| Q14956   | GPNMB    | 249  | 35.78  |
| Q15043   | SLC39A14 | 77   | 1000   |
| Q15223   | PVRL1    | 72   | 1000   |
| Q15223   | PVRL1    | 202  | 30.84  |
| Q15223   | PVRL1    | 297  | 1000   |
| Q15262   | PTPRK    | 416  | 1000   |
| Q15262   | PTPRK    | 436  | 1000   |
| Q15262   | PTPRK    | 462  | 65.25  |
| Q15303   | ERBB4    | 358  | 1000   |
| Q15303   | ERBB4    | 576  | 1000   |
| Q15758   | SLC1A5   | 212  | 1000   |
| Q15768   | EFNB3    | 210  | 18.81  |
| Q15904   | ATP6AP1  | 261  | 1000   |
| Q16563   | SYPL1    | 71   | 27.12  |

|        |          |      |       |
|--------|----------|------|-------|
| Q29980 | MICB     | 234  | 1000  |
| Q29983 | MICA     | 79   | 1000  |
| Q29983 | MICA     | 125  | 1000  |
| Q29983 | MICA     | 210  | 1000  |
| Q29983 | MICA     | 220  | 1000  |
| Q3MIR4 | TMEM30B  | 213  | 11.07 |
| Q3MIR4 | TMEM30B  | 241  | 13.38 |
| Q3MIR4 | TMEM30B  | 273  | 1000  |
| Q3MIR4 | TMEM30B  | 286  | 36.56 |
| Q3ZCQ3 | FAM174B  | 53   | 1000  |
| Q4KMQ2 | ANO6     | 493  | 30.84 |
| Q4KMQ2 | ANO6     | 802  | 29.67 |
| Q58DX5 | NAALADL2 | 295  | 37.54 |
| Q58DX5 | NAALADL2 | 556  | 48.87 |
| Q58EX2 | SDK2     | 577  | 1000  |
| Q58EX2 | SDK2     | 936  | 33.66 |
| Q5HYA8 | TMEM67   | 179  | 1000  |
| Q5MY95 | ENTPD8   | 135  | 1000  |
| Q5SZK8 | FREM2    | 2121 | 1000  |
| Q5VU97 | CACHD1   | 329  | 24.44 |
| Q5VW38 | GPR107   | 169  | 12.79 |
| Q5VY80 | RAET1L   | 68   | 1000  |
| Q5ZPR3 | CD276    | 91   | 1000  |
| Q5ZPR3 | CD276    | 104  | 1000  |
| Q5ZPR3 | CD276    | 215  | 1000  |
| Q5ZPR3 | CD276    | 309  | 1000  |
| Q658P3 | STEAP3   | 344  | 1000  |
| Q6EMK4 | VASN     | 117  | 1000  |
| Q6H3X3 | RAET1G   | 82   | 1000  |
| Q6P4Q7 | CNNM4    | 85   | 33.66 |
| Q6P4Q7 | CNNM4    | 122  | 1000  |
| Q6P4Q7 | CNNM4    | 127  | 1000  |
| Q6PCB8 | EMB      | 83   | 0.65  |
| Q6PCB8 | EMB      | 85   | 0.34  |
| Q6PCB8 | EMB      | 100  | 1.72  |
| Q6PCB8 | EMB      | 213  | 1000  |
| Q6PCB8 | EMB      | 218  | 1000  |
| Q6UWV2 | MPZL3    | 123  | 1000  |
| Q6UXD5 | SEZ6L2   | 641  | 1000  |
| Q6UXG2 | KIAA1324 | 391  | 12.22 |
| Q6UXG2 | KIAA1324 | 404  | 85.27 |
| Q6UXG2 | KIAA1324 | 672  | 5.09  |
| Q6UXI9 | NPNT     | 273  | 1000  |

|        |         |      |        |
|--------|---------|------|--------|
| Q6YHK3 | CD109   | 118  | 1000   |
| Q6YHK3 | CD109   | 419  | 1000   |
| Q6ZMP0 | THSD4   | 709  | 1000   |
| Q6ZUK4 | TMEM26  | 110  | 52.40  |
| Q7KYR7 | BTN2A1  | 216  | 58.82  |
| Q7KYR7 | BTN2A1  | 222  | 17.01  |
| Q7Z5N4 | SDK1    | 782  | 75.10  |
| Q7Z5N4 | SDK1    | 1767 | 1000   |
| Q86SQ4 | GPR126  | 143  | 1000   |
| Q86SQ4 | GPR126  | 505  | 24.44  |
| Q86UF1 | TSPAN33 | 172  | 4.69   |
| Q86WC4 | OSTM1   | 135  | 1000   |
| Q8IWA5 | SLC44A2 | 187  | 1000   |
| Q8IWA5 | SLC44A2 | 200  | 1000   |
| Q8IWA5 | SLC44A2 | 417  | 132.11 |
| Q8IWT6 | LRRC8A  | 66   | 1000   |
| Q8IWU5 | SULF2   | 132  | 1000   |
| Q8IWU5 | SULF2   | 171  | 1000   |
| Q8N0Z9 | VSIG10  | 347  | 1000   |
| Q8N271 | PROM2   | 725  | 1000   |
| Q8N3J6 | CADM2   | 291  | 1000   |
| Q8N441 | FGFRL1  | 231  | 1000   |
| Q8N6C5 | IGSF1   | 607  | 1000   |
| Q8N6C5 | IGSF1   | 1223 | 1000   |
| Q8N8Z6 | DCBLD1  | 64   | 47.57  |
| Q8NAC3 | IL17RC  | 443  | 18.98  |
| Q8NBN3 | TMEM87A | 157  | 1000   |
| Q8NBN3 | TMEM87A | 160  | 1000   |
| Q8NC42 | RNF149  | 131  | 100.02 |
| Q8NCS7 | SLC44A5 | 416  | 1000   |
| Q8NCS7 | SLC44A5 | 425  | 1000   |
| Q8NE01 | CNNM3   | 73   | 1000   |
| Q8NFZ8 | CADM4   | 67   | 1000   |
| Q8NFZ8 | CADM4   | 259  | 7.97   |
| Q8NFZ8 | CADM4   | 262  | 13.38  |
| Q8TAB3 | PCDH19  | 546  | 1000   |
| Q8TB96 | ITFG1   | 353  | 25.17  |
| Q8TB96 | ITFG1   | 371  | 7.71   |
| Q8TC71 | SPATA18 | 495  | 1000   |
| Q8TCJ2 | STT3B   | 628  | 0.00   |
| Q8TCT8 | SPPL2A  | 149  | 1000   |
| Q8TCT8 | SPPL2A  | 155  | 1000   |
| Q8WTV0 | SCARB1  | 102  | 76.73  |

|        |          |       |       |
|--------|----------|-------|-------|
| Q8WTV0 | SCARB1   | 108   | 24.44 |
| Q8WWI5 | SLC44A1  | 180   | 1000  |
| Q8WWY8 | LIPH     | 357   | 1000  |
| Q8WXI7 | MUC16    | 12416 | 1000  |
| Q92508 | PIEZO1   | 2294  | 1000  |
| Q92508 | PIEZO1   | 2331  | 1000  |
| Q92542 | NCSTN    | 387   | 1000  |
| Q92542 | NCSTN    | 417   | 1000  |
| Q92542 | NCSTN    | 612   | 1000  |
| Q92823 | NRCAM    | 223   | 1000  |
| Q92823 | NRCAM    | 276   | 45.03 |
| Q92823 | NRCAM    | 858   | 28.93 |
| Q92823 | NRCAM    | 1019  | 48.87 |
| Q92854 | SEMA4D   | 379   | 71.75 |
| Q96HA4 | C1orf159 | 104   | 1000  |
| Q96HA4 | C1orf159 | 111   | 1000  |
| Q96HA4 | C1orf159 | 128   | 1000  |
| Q96K49 | TMEM87B  | 68    | 1000  |
| Q96NT5 | SLC46A1  | 58    | 1000  |
| Q96NY8 | PVRL4    | 281   | 1000  |
| Q96QE2 | SLC2A13  | 433   | 1000  |
| Q96RD7 | PANX1    | 255   | 1000  |
| Q99523 | SORT1    | 162   | 24.44 |
| Q99571 | P2RX4    | 75    | 1000  |
| Q9BRN9 | TM2D3    | 157   | 1000  |
| Q9BTN0 | LRFN3    | 339   | 1000  |
| Q9BXC0 | HCAR1    | 3     | 1000  |
| Q9BY67 | CADM1    | 101   | 1000  |
| Q9BY67 | CADM1    | 113   | 1000  |
| Q9BZC7 | ABCA2    | 1549  | 1000  |
| Q9BZC7 | ABCA2    | 1557  | 1000  |
| Q9BZR6 | RTN4R    | 372   | 1000  |
| Q9C0C4 | SEMA4C   | 106   | 24.44 |
| Q9C0C4 | SEMA4C   | 121   | 1000  |
| Q9C0C4 | SEMA4C   | 522   | 1000  |
| Q9H0U3 | MAGT1    | 71    | 1000  |
| Q9H0X4 | ITFG3    | 116   | 48.87 |
| Q9H0X4 | ITFG3    | 120   | 24.44 |
| Q9H0X4 | ITFG3    | 314   | 1000  |
| Q9H0X4 | ITFG3    | 389   | 1000  |
| Q9H2X9 | SLC12A5  | 333   | 1000  |
| Q9H2X9 | SLC12A5  | 351   | 9.11  |
| Q9H2X9 | SLC12A5  | 361   | 0.85  |

|        |         |      |        |
|--------|---------|------|--------|
| Q9H2X9 | SLC12A5 | 362  | 0.65   |
| Q9H6X2 | ANTXR1  | 184  | 1000   |
| Q9H8M5 | CNNM2   | 112  | 24.44  |
| Q9HC56 | PCDH9   | 450  | 1000   |
| Q9HC58 | SLC24A3 | 86   | 31.60  |
| Q9HCN3 | TMEM8A  | 232  | 1000   |
| Q9HCN3 | TMEM8A  | 535  | 1000   |
| Q9HCU4 | CELSR2  | 1032 | 0.00   |
| Q9HCU4 | CELSR2  | 1036 | 20.17  |
| Q9HCU4 | CELSR2  | 1076 | 115.01 |
| Q9HCU4 | CELSR2  | 1501 | 1000   |
| Q9HCU4 | CELSR2  | 1565 | 6.59   |
| Q9HCU4 | CELSR2  | 1741 | 1000   |
| Q9HCU4 | CELSR2  | 1900 | 1000   |
| Q9HCU4 | CELSR2  | 2024 | 0.00   |
| Q9HCU4 | CELSR2  | 2043 | 1000   |
| Q9HCU4 | CELSR2  | 2061 | 1000   |
| Q9HDC9 | APMAP   | 160  | 1000   |
| Q9NPH3 | IL1RAP  | 107  | 1000   |
| Q9NPH3 | IL1RAP  | 111  | 1000   |
| Q9NPH3 | IL1RAP  | 118  | 1000   |
| Q9NPR2 | SEMA4B  | 405  | 1000   |
| Q9NV96 | TMEM30A | 107  | 1000   |
| Q9NV96 | TMEM30A | 294  | 6.04   |
| Q9NYQ6 | CELSR1  | 1576 | 1000   |
| Q9NYQ6 | CELSR1  | 1640 | 9.34   |
| Q9NYQ6 | CELSR1  | 1979 | 1000   |
| Q9NYQ6 | CELSR1  | 1982 | 1000   |
| Q9NYQ6 | CELSR1  | 2122 | 1000   |
| Q9NZU0 | FLRT3   | 226  | 24.24  |
| Q9P055 | JKAMP   | 37   | 1000   |
| Q9P0K1 | ADAM22  | 519  | 16.20  |
| Q9P2B2 | PTGFRN  | 286  | 1000   |
| Q9P2B2 | PTGFRN  | 300  | 1000   |
| Q9P2B2 | PTGFRN  | 525  | 24.44  |
| Q9P2B2 | PTGFRN  | 600  | 1000   |
| Q9P2B2 | PTGFRN  | 618  | 1000   |
| Q9UGT4 | SUSD2   | 162  | 1000   |
| Q9UGT4 | SUSD2   | 494  | 1000   |
| Q9UHG3 | PCYOX1  | 323  | 46.82  |
| Q9UHN6 | TMEM2   | 171  | 1000   |
| Q9UHN6 | TMEM2   | 292  | 1000   |
| Q9UHN6 | TMEM2   | 739  | 1000   |

|          |          |      |       |
|----------|----------|------|-------|
| Q9UHN6   | TMEM2    | 1092 | 1000  |
| Q9UHW9   | SLC12A6  | 398  | 9.34  |
| Q9UIG8   | SLCO3A1  | 153  | 1000  |
| Q9UIW2   | PLXNA1   | 77   | 1000  |
| Q9UIW2   | PLXNA1   | 1043 | 1000  |
| Q9UJ14   | GGT7     | 586  | 4.69  |
| Q9UJW2-2 | TINAG    | 171  | 0.00  |
| Q9UJW2-2 | TINAG    | 175  | 0.00  |
| Q9ULF5   | SLC39A10 | 339  | 58.70 |
| Q9ULI3   | HEG1     | 1080 | 1000  |
| Q9UM47   | NOTCH3   | 1179 | 1000  |
| Q9UN76   | SLC6A14  | 155  | 1000  |
| Q9UN76   | SLC6A14  | 174  | 30.61 |
| Q9UN76   | SLC6A14  | 189  | 1000  |
| Q9UP38   | FZD1     | 231  | 1000  |
| Q9Y4D7   | PLXND1   | 155  | 1000  |
| Q9Y4D7   | PLXND1   | 500  | 48.87 |
| Q9Y4D7   | PLXND1   | 696  | 1000  |
| Q9Y4L1   | HYOU1    | 515  | 1000  |
| Q9Y4L1   | HYOU1    | 869  | 1000  |
| Q9Y4L1   | HYOU1    | 922  | 1000  |
| Q9Y4L1   | HYOU1    | 931  | 1000  |
| Q9Y5L3   | ENTPD2   | 129  | 31.28 |
| Q9Y5L3   | ENTPD2   | 294  | 0.00  |
| Q9Y5Y6   | ST14     | 485  | 1000  |
| Q9Y639   | NPTN     | 197  | 73.31 |
| Q9Y639   | NPTN     | 229  | 1000  |
| Q9Y639   | NPTN     | 276  | 1000  |
| Q9Y639   | NPTN     | 284  | 1000  |
| Q9Y653   | GPR56    | 303  | 1000  |
| Q9Y6M7   | SLC4A7   | 786  | 49.59 |
| Q9Y6M7   | SLC4A7   | 796  | 1000  |

## 45 Sites) Identified on 265 Surface Glycop

| ModScore Peptide                    | PPM   | XCorr |
|-------------------------------------|-------|-------|
| K.EGN#STVDCLK.G                     | 4.87  | 3.32  |
| R.ASVDFVFGN#R.T                     | 10.03 | 2.054 |
| K.N#ATFTFTWAFQR.T                   | 2.24  | 4.228 |
| R.AFALN#CSWR.G                      | -0.48 | 3.091 |
| K.QLVLN#LTGNTLCAGGASDEK.L           | 0.7   | 3.083 |
| K.IN#CSDGYIEYYICR.G                 | 0.96  | 3.337 |
| R.TEPGIGPEGNMSTGAPQPN#LMPSN#PDSGM   | -2.32 | 1.129 |
| R.TEPGIGPEGNMSTGAPQPN#LMPSN#PDSGM   | -2.32 | 1.129 |
| R.N#ISQVLEK.K                       | 0.66  | 3.521 |
| R.EGICNGFTALCPASDPKPN#FTDCNR.H      | -0.66 | 1.858 |
| K.RGPECSQN#YTTPSGVIK.S              | 6.78  | 3.178 |
| K.IGYSNN#GSDWK.M                    | 0.03  | 2.136 |
| R.ALSN#ISLR.L                       | -0.1  | 2.429 |
| R.GGLN#LTA VTVA AEN#NHTVAFLGTS DGR. | -0.89 | 7.781 |
| R.GGLN#LTA VTVA AEN#NHTVAFLGTS DGR. | 0.87  | 8.055 |
| R.GGLN#LTA VTVA AENN#HTVAFLGTS DGR. | -5.97 | 8.166 |
| K.SCVAVTSAQPQN#MSR.R                | 9.26  | 3.729 |
| K.LSHDAN#ETLPLHLYVK.S               | -0.76 | 5.708 |
| R.ISVAGRN#CSFQPER.Y                 | 2.87  | 4.545 |
| R.EAESLQPM*TVVGTDYVFHN#DTK.V        | 2.04  | 4.091 |
| R.GIN#ASSMAWAR.L                    | 5.01  | 3.098 |
| R.KQELSRDN#ATLQATLHAAR.D            | 0.97  | 3.856 |
| K.RLN#TTGVSAGCTADLLVGR.A            | 2.33  | 3.989 |
| K.LN#TSAGNVDIYKK.L                  | 4.03  | 1.952 |
| K.SFN#ATAERGEEM*TFSCR.A             | -0.23 | 1.628 |
| R.YN#CTATNHIGTR.F                   | -1.05 | 2.86  |
| R.SHGVQTM*VVLNNLEPN#TTYEIR.V        | 4.97  | 5.084 |
| R.N#LTILDLSNNN#IAN#INDDMLEGLEK.L    | -4.78 | 1.527 |
| R.N#LTILDLSNNN#IAN#INDDMLEGLEK.L    | -4.78 | 1.527 |
| R.N#LTILDLSNNN#IAN#INDDMLEGLEK.L    | -4.78 | 1.527 |
| K.YTLDPN#ITSAGPTK.S                 | 1.88  | 1.243 |
| R.GLTCN#R.S                         | -0.26 | 1.934 |
| R.VN#CSVYVQLEK.V                    | 1.16  | 2.566 |
| R.VLEAVN#GTDAR.L                    | 4.46  | 4.084 |
| K.N#LTNIDISK.N                      | 4.33  | 2.972 |
| K.TYN#GTNPDAASR.A                   | -0.81 | 2.461 |
| K.N#QSVPLSCCR.E                     | -0.74 | 1.2   |
| K.AMGIMN#SFVNDIFER.I                | -0.06 | 2.238 |
| R.QFFSN#CTVDR.V                     | -1.2  | 3.09  |
| R.VQGN#STLLHITDLQAR.D               | 4.03  | 3.094 |

|                                  |       |       |
|----------------------------------|-------|-------|
| K.NYN#NTWTR.L                    | -0.53 | 2.341 |
| K.RTLTLVENKPIQLN#CSVK.S          | -1.11 | 6.579 |
| R.LSQAQGN#LSVLETR.Q              | 2.53  | 1.919 |
| R.QVQLECVVLN#R.T                 | 0.35  | 1.776 |
| K.RAEDTAGQTALTVMRPDASLQVDTVVPN#  | -0.11 | 2.19  |
| K.TVVTYHIPQN#SSLENVDSR.Y         | 4.39  | 3.87  |
| R.LFN#VTPQDEQK.F                 | 0.72  | 3.348 |
| K.AATCINPLN#GSVCERPAN#HSAK.Q     | 3.14  | 4.021 |
| K.AATCINPLN#GSVCERPAN#HSAK.Q     | 3.14  | 4.021 |
| K.CIN#QSICEK.C                   | -1.3  | 2.039 |
| K.CEN#LTTGK.H                    | -2.24 | 2.131 |
| R.N#ATTPLWR.T                    | -0.21 | 2.189 |
| R.N#NSNNFDLNR.N                  | 1.1   | 1.469 |
| R.CRVPDAAN#LSSAWR.N              | 0.01  | 4.61  |
| R.LATIAN#FSALGLEPGR.D            | 2.93  | 4.507 |
| K.TAVLTAFAN#GR.S                 | -1.78 | 2.845 |
| R.GAN#DSTSAMPEQMK.F              | 1.48  | 1.881 |
| K.VQEHYN#YTK.E                   | -2    | 3.323 |
| R.LSDTAN#YTCVAK.N                | -1.47 | 1.215 |
| R.DLASSEN#GTECR.S                | -0.3  | 2.145 |
| K.LN#LTSR.A                      | -0.37 | 2.029 |
| R.EACQGTSPPVVSCYN#ASDHVYK.G      | -0.18 | 3.164 |
| K.GCFDGN#VTLTAAN#VTVSLPVR.G      | 3.24  | 3.909 |
| K.GCFDGN#VTLTAAN#VTVSLPVR.G      | 3.24  | 3.909 |
| R.CNSDLRN#K.T                    | 0.37  | 1.411 |
| K.EIFVAN#GTQ GK.L                | -0.48 | 3.12  |
| R.SVNPN#DTCLASCVK.S              | -0.1  | 3.365 |
| R.N#TTEVVNTMCGYK.T               | 0.99  | 3.541 |
| R.GYYN#QSEAGSHTVQR.M             | -0.34 | 2.732 |
| K.DFEDLYTPVN#GSIVIVR.A           | 1.29  | 5.817 |
| K.QN#NGAFN#ETLFR.N               | 4.4   | 1.891 |
| K.QNN#GAFN#ETLFR.N               | 0.38  | 3.538 |
| R.KQNNGAFN#ETLFR.N               | 1.25  | 5.659 |
| K.QHTVTTTTTKGEN#FTETDVK.M        | 6.35  | 2.63  |
| K.VGVN#GFGR.I                    | 0.87  | 2.754 |
| K.VIPELN#GK.L                    | 0.87  | 2.563 |
| R.GHCWGP GP TQCVN#CSQFLR.G       | -0.07 | 5.521 |
| R.HCLPCHPECQPQN#GSVTCFGPEADQCVAC | 0.97  | 2.19  |
| K.FPDEEGACQPCPIN#CTHSCVDLDDK.G   | 10.19 | 1.808 |
| R.FKLEWLGN#CSGLNDETYGYK.E        | -0.12 | 6.447 |
| R.VLGFKPKPPKN#ESLETYPVM*K.Y      | -0.19 | 4.809 |
| K.YLQPLLA VQFTN#LTM*DTEIR.I      | -1.81 | 1.941 |
| R.SLSSAIN#ASTGNYLLESV NKLFGEK.S  | 0.67  | 1.475 |

|                                    |       |       |
|------------------------------------|-------|-------|
| R.AN#LTVVLLR.G                     | 0.95  | 2.677 |
| R.LNPTV TYGN#DSFSAK.A              | 4.86  | 3.526 |
| K.LRN#PCTSEQNCTSPFSYK.N            | 0.1   | 2.201 |
| K.LRNPCTSEQN#CTSPFSYK.N            | 0.64  | 5.07  |
| K.NGVN#GTGENGR.K                   | -0.07 | 4.846 |
| K.NGVN#GTGEN#GR.K                  | -0.26 | 3.854 |
| K.CHEGN#GTFECGACR.C                | -0.14 | 5.269 |
| R.KEN#SSEICSNNGECVCGQCVC.R.K       | 8.68  | 4.45  |
| R.KEN#SSEICSN#NGECVCGQCVC.R.K      | 1.01  | 1.079 |
| K.KDTCTQECSYFN#ITK.V               | 3.25  | 5.362 |
| R.GLSPGN#YSVR.I                    | 7.37  | 3.279 |
| R.SIVYSCEWPLYM*WPFQKPN#YTEIR.Q     | -0.56 | 2.229 |
| R.VYPELPKPSISSN#NSKPVEDK.D         | 8.01  | 3.354 |
| R.LQLSN#GN#R.T                     | -1.16 | 1.866 |
| R.LQLSN#GN#R.T                     | -1.16 | 1.866 |
| R.TLTLFN#VTR.N                     | 0.89  | 3.814 |
| R.RSDSVILNVLYGPDAPTISPLN#TSYR.S    | 6.66  | 5.042 |
| R.LQLSNDN#R.T                      | -0.45 | 3.451 |
| K.TITVSAELPKPSISSN#NSKPVEDK.D      | 7.27  | 7.008 |
| R.AYVCGIQNSVSAN#R.S                | 10.96 | 2.528 |
| K.ITPNNN#GTYACFVSNLATGRN#NSIVK.S   | -0.78 | 6.429 |
| K.ITPNNN#GTYACFVSN#LATGRNNSIVK.S   | 0.61  | 1.921 |
| R.N#NSIVK.S                        | -0.65 | 2.48  |
| K.AN#TTQPGIVEGGQVLK.C              | 0.39  | 2.69  |
| K.N#MTISR.G                        | -0.26 | 1.986 |
| K.TEN#QTR.Q                        | -0.18 | 1.754 |
| K.ISSLQTTEKN#DTVAGQGER.D           | -0.31 | 3.126 |
| K.ENQN#HSYSLK.S                    | -0.52 | 2.069 |
| K.GSLSYLN#VTRK.A                   | -7.28 | 3.467 |
| K.TCDWLPKPN#MSASCK.E               | -1.57 | 2.393 |
| K.RACTENNECCHPECLGSCSAPDN#DTACVA   | -0.34 | 7.519 |
| R.N#GSQSMYCIPCEGPCPK.V             | 2.13  | 1.251 |
| R.TN#ASVPSIPLDVLSASN#SSSQLIVK.W    | 2.11  | 1.624 |
| R.TN#ASVPSIPLDVLSASN#SSSQLIVK.W    | 2.11  | 1.624 |
| K.WNPPSLPN#GN#LSYYIVR.W            | -3.05 | 2.636 |
| K.WNPPSLPN#GN#LSYYIVR.W            | -3.05 | 2.636 |
| K.RRDVMQVAN#TTMSSR.S               | 1.92  | 1.709 |
| R.SRN#TTAADTYN#ITDPEELETEYPPFESR.V | -0.82 | 5.685 |
| R.SRN#TTAADTYN#ITDPEELETEYPPFESR.V | -0.82 | 5.685 |
| R.LNPGN#YTAR.I                     | 0.07  | 2.978 |
| R.IQATSLSGN#GSWTDPVFFYVQAK.T       | 5.67  | 2.218 |
| K.GSQWSDIEEFCN#RSCEVPTR.L          | 1.05  | 3.758 |
| K.DASSFLAEWQN#ITK.G                | -0.46 | 3.104 |

|                                   |       |       |
|-----------------------------------|-------|-------|
| K.GFSEDRLLIAGTN#SSDLQQILSLLESNK.D | -0.58 | 6.423 |
| K.SLVTQYLN#ATGNR.W                | 0.06  | 3.85  |
| K.SLVTQYLNATGN#R.W                | 2.12  | 1.959 |
| R.SCIN#ESAIDSR.G                  | 1.15  | 2.095 |
| K.EIAN#ATAKPEDRNDPMLLYNK.M        | 1.5   | 3.705 |
| K.GN#LTYGYVTILN#GSDIR.S           | 10.22 | 2.461 |
| K.GN#LTYGYVTILN#GSDIR.S           | 10.22 | 2.461 |
| K.IYLRN#ESEFRDK.L                 | 1.74  | 3.964 |
| K.NLN#NSQSDVVSFR.L                | 3.55  | 3.183 |
| R.VTGLN#CTTNHPINPK.G              | -7.51 | 3.319 |
| K.NN#HTASILDR.M                   | -7.35 | 3.243 |
| K.NVFN#ETK.N                      | 5.52  | 1.23  |
| K.ARQCN#QTSVCWCVNSVGVR.R          | 0.02  | 2.909 |
| R.HRPTAGAFN#HSDLDAELRR.L          | -0.14 | 6.043 |
| R.QN#TSQK.A                       | -0.46 | 2.491 |
| R.DINSQQELQN#ITTDTR.F             | 3.21  | 3.248 |
| K.KKEDALN#ETRESETK.L              | -0.98 | 1.687 |
| R.EIRHN#STGCLR.M                  | -0.41 | 2.335 |
| R.EGFVGNRCDQCEENYFYN#R.S          | -1.05 | 2.972 |
| R.VN#NTLSSQISR.L                  | 0.46  | 1.607 |
| R.RVNDN#K.T                       | -0.1  | 2.963 |
| R.KIPAIN#QTITEANEK.T              | 0.22  | 3.782 |
| K.N#ATSTK.A                       | 0.3   | 2.415 |
| K.VIEEFYN#QTWVHR.Y                | -0.01 | 5.351 |
| K.N#MTFDLPSDATVVVLN#R.S           | 2.38  | 4.027 |
| K.N#MTFDLPSDATVVVLN#R.S           | 2.38  | 4.027 |
| R.SSCGKEN#TSDPSLVIAFGR.G          | 5.33  | 2.631 |
| R.GHTLTLN#FTR.N                   | 0.16  | 4.093 |
| R.KDN#TTVTR.L                     | -0.36 | 2.096 |
| R.FFLQGIQLN#TILPDARDPAFK.A        | -0.76 | 5.366 |
| K.TAGVN#TTDK.E                    | -0.05 | 1.371 |
| R.YHN#QTLR.Y                      | 0.22  | 1.453 |
| K.GYPCGGN#K.T                     | -1.19 | 1.675 |
| K.RQQYNALLSN#MSR.I                | -2.07 | 6.046 |
| K.NMQIAN#HTLK.Y                   | -7.84 | 2.8   |
| K.WQMN#FTVR.Y                     | -0.56 | 2.248 |
| R.YETTN#K.T                       | -0.54 | 2.116 |
| K.IAVQFGPGFSWIAN#FTK.A            | -0.51 | 3.498 |
| R.LN#SSTIK.Y                      | -0.04 | 2.856 |
| R.VQPFN#VTQGK.Y                   | -0.26 | 2.193 |
| K.TAVN#CSSDFDACLITK.A             | -0.21 | 1.708 |
| R.LGAELRN#ASLR.M                  | 2.42  | 2.456 |
| R.MN#GSEIQYK.I                    | 4.66  | 2.612 |

|                                  |       |       |
|----------------------------------|-------|-------|
| K.AFN#STLPTM*AQMEK.A             | 6.9   | 2.535 |
| R.CSFRDEDDCTYSYTMEGDGAPGPN#STVI  | 7.35  | 3.042 |
| K.AEMN#GSK.L                     | -0.01 | 2.116 |
| K.QCN#GTSMCWCVNTAGVR.R           | 1.09  | 2.588 |
| K.FITSILYENNVITIDLQVQ#SSQK.T     | -1.16 | 1.482 |
| K.LSGCQN#ITSTK.C                 | -0.21 | 2.264 |
| K.N#SSGVEER.I                    | 0.01  | 2.412 |
| K.LNLQTSTIPN#VTEM*K.T            | -2.28 | 2.647 |
| R.YFFN#VSDEAALLEK.A              | -0.14 | 2.862 |
| R.AN#YTGQIVLYSVN#ENGNITVIQHR.G   | -0.63 | 3.442 |
| R.AN#YTGQIVLYSVN#ENGNITVIQHR.G   | -0.63 | 3.442 |
| R.AN#YTGQIVLYSVNENGN#ITVIQHR.G   | 0.28  | 3.464 |
| R.TASCSN#VTCWLK.D                | -1.54 | 2.497 |
| K.GEYFVN#VTTR.I                  | 0.48  | 1.877 |
| K.CHAGYIGDNCN#CSTDISTCR.G        | 0.17  | 3.199 |
| K.EVEVN#SSK.C                    | -0.61 | 1.351 |
| K.RN#STSIYFK.M                   | 2.25  | 2.882 |
| K.YIHPQN#NSICCTK.C               | -2.35 | 1.578 |
| K.RLKPLFN#K.S                    | -0.8  | 3.755 |
| R.EAGN#HTSGAGLVQINK.S            | -8.67 | 4.574 |
| K.CVN#ASR.C                      | -0.69 | 1.815 |
| K.LDN#YSTQELGK.T                 | -0.32 | 2.072 |
| K.DGVHLGPNN#R.T                  | -0.45 | 1.937 |
| K.NLN#VTSLGFR.S                  | -0.69 | 4.152 |
| K.VCDPLCSSGGCWGPGPGQCLSCRN#YSR.G | 0.31  | 2.035 |
| K.YPDVQNECRPCHEN#CTQGCK.G        | -0.36 | 2.047 |
| K.AIHYALN#CCGLAGGVEQFISDICPK.K   | -0.55 | 4.689 |
| R.QVLN#ITDK.D                    | 1.39  | 3.322 |
| K.MN#ASFSLK.S                    | -0.09 | 1.892 |
| K.MYN#GSVPFEER.I                 | 3.1   | 3.054 |
| R.N#LSCREPNQHFKPYLK.H            | 9.54  | 4.137 |
| K.QLSCVANQN#GSQADCELGNPFKR.N     | 0.2   | 4.682 |
| R.KYQTLN#CSVNVNVCNIR.C           | 3.98  | 2.426 |
| K.TVTSASNN#ETYCR.S               | -1.28 | 2.117 |
| R.LCDEGHGLEVEIN#CTR.T            | -1.03 | 2.958 |
| R.CKPNFFCN#STVCEHCDPCTK.C        | 0.7   | 4.539 |
| R.MN#ITVK.N                      | -0.75 | 2.163 |
| K.N#ITIVTGAPR.H                  | 0.17  | 3.919 |
| R.N#ITLAYTLEADRDR.R              | -0.43 | 2.712 |
| K.LLLSIN#VTNTR.T                 | -0.28 | 2.644 |
| R.TSIPTINMEN#K.T                 | -0.07 | 2.925 |
| R.N#CSCQCEDNRGPK.G               | -0.37 | 2.167 |
| K.GFCEAPGN#R.T                   | -0.68 | 1.364 |

|                                   |        |       |
|-----------------------------------|--------|-------|
| K.LNKPFLFDTKPLIVQYEVNFQN#GIECGGAY | -0.39  | 3.89  |
| K.ELSEYN#ATAIK.S                  | 0.47   | 3.095 |
| R.GYYN#QSEAGSHTLQR.M              | -0.14  | 4.056 |
| K.NWQLTEEDFGN#TSGR.L              | 0.36   | 3.668 |
| R.LCLNN#DTK.E                     | 9.7    | 2.979 |
| R.MQQLPAYQGEOPYCN#R.T             | 1.49   | 2.27  |
| R.VTYQNH#K.T                      | -0.12  | 1.585 |
| K.VPGN#QTSTTLK.L                  | 2.8    | 2.333 |
| R.GYN#VTYWR.E                     | 1.3    | 3.412 |
| R.SFDDHFQHLLN#DSER.T              | 5.22   | 4.966 |
| K.ILLTCSLN#DSATEVTGHR.W           | -0.25  | 4.915 |
| K.ALMN#GSESR.F                    | 0.01   | 3.127 |
| R.CN#GTSSK.G                      | -0.34  | 2.442 |
| K.AGHFQN#TSSPSAR.C                | -7.83  | 1.642 |
| K.EQYTIIN#R.T                     | -0.66  | 1.621 |
| K.N#LSCIVNEGK.K                   | -3.76  | 2.57  |
| K.SHLQN#YTVN#ATK.L                | 4.99   | 2.858 |
| K.SHLQN#YTVN#ATK.L                | 4.99   | 2.858 |
| K.HLLEN#STASVSEAERK.A             | 8.47   | 5.33  |
| R.ACM*N#ETRIEELR.A                | -0.34  | 1.951 |
| R.LGGWN#ITGPWAK.D                 | 0.91   | 3.264 |
| K.NSN#SNVIQVDQSGGLPSR.D           | -2.84  | 3.125 |
| R.DYYLN#K.T                       | -0.96  | 1.801 |
| R.FFN#FSWR.V                      | 0.42   | 3.672 |
| K.N#SSVEAFKR.Q                    | -0.5   | 2.522 |
| K.RQTECMVEQYSN#YSVNGEPVNGR.H      | -0.44  | 5.96  |
| K.RQTECMVEQYSN#YSVNGEPVN#GR.H     | -11.61 | 3.281 |
| K.RYHQPGHEAVTSAVDQLQQEFHCCGSN#N   | -0.48  | 3.721 |
| K.RYHQPGHEAVTSAVDQLQQEFHCCGSNN#   | 0.46   | 3.773 |
| R.WCPQNSSCVN#ATACR.C              | 5.6    | 1.137 |
| K.TFKN#ESENTCQDVDECQQNPR.L        | -8.25  | 4.643 |
| R.GDKN#VTMGQSSAR.M                | 0.1    | 3.164 |
| R.SLSN#STAR.N                     | -0.55  | 2.543 |
| R.TQN#FTLLVQGSPELK.T              | -1.17  | 2.882 |
| K.LCDYEN#RFNTSK.G                 | 3.12   | 3.37  |
| K.LCDYENRFN#TSK.G                 | 0.37   | 3.035 |
| K.LAPN#LTELR.A                    | 2.96   | 4.017 |
| K.N#ISASAR.E                      | -4.29  | 2.773 |
| R.TCN#ASQGFKR.W                   | -0.83  | 2.494 |
| K.N#VSCLWCNTNK.A                  | 1.51   | 2.687 |
| K.FLKPYTLEEQKN#LTVCPDGALFEQK.G    | -3.07  | 5.567 |
| K.KLVGYLQPLVAVQVSFAPN#NTGK.E      | 0.29   | 4.979 |
| R.DATGNVN#DTIVTELTN#CTSAACK.L     | 0.19   | 4.033 |

|                               |       |       |
|-------------------------------|-------|-------|
| R.DATGNVN#DTIVTELTN#CTSAACK.L | 0.19  | 4.033 |
| R.N#TSAASTAQLVEATEELRR.E      | 2.14  | 4.868 |
| R.RAN#TSALAVPSPVSNASAR.H      | -0.3  | 4.117 |
| K.QGWQNSIRHN#LSLNK.C          | -1.4  | 1.067 |
| K.ETN#FSLASGLEAK.D            | 0.16  | 3.123 |
| K.GN#NCLDAAK.A                | -1.05 | 2.992 |
| K.SN#VSGNTHLCISNGNYEK.E       | 2.84  | 5.143 |
| K.N#LTVYTGLWVK.C              | 4.88  | 3.425 |
| R.DDFFGHYACDQNGN#K.T          | -0.69 | 2.927 |
| K.VVVVDGKN#ESEYTVK.W          | -0.51 | 2.915 |
| K.MFSN#CSK.Q                  | 8     | 2.096 |
| K.CQEAIN#ATCK.G               | 0.1   | 2.171 |
| R.EQQLESCACN#ETDNSCK.V        | 1.79  | 1.123 |
| R.EQQLESCACNETDN#SCK.V        | -2.62 | 1.256 |
| R.NTSPDTN#YTLYYWHR.S          | -1.57 | 1.901 |
| R.ALVN#FTR.S                  | -0.18 | 2.385 |
| R.AN#YTILK.G                  | -0.8  | 2.656 |
| K.AIN#DTAAR.L                 | -0.97 | 2.678 |
| K.CCN#TTK.C                   | -0.62 | 2.034 |
| R.DGYEPCVNEGMCVTYHN#GTGYCK.C  | 3.06  | 4.005 |
| R.CDMDGQN#R.T                 | -0.56 | 2.946 |
| R.AVN#SSCR.A                  | -0.28 | 2.303 |
| R.TCVSN#CTASQFVCK.N           | -0.47 | 1.341 |
| K.QSGDVTCN#CTDGR.V            | -1.03 | 3.335 |
| K.AN#DSDQGANAEIEYTFHQAPEVRR.L | 0.88  | 2.389 |
| K.GN#LTFTAQYLSYR.I            | 0.15  | 3.536 |
| K.N#GTDEK.F                   | -0.3  | 1.656 |
| K.GRDIYTFDGALN#K.S            | 6.97  | 2.804 |
| K.SDAVSHTGN#YTCEVTELTR.E      | -0.18 | 3.098 |
| K.AALSWSNGN#GTASCR.V          | 6.85  | 3.402 |
| R.YN#ATVYSQAAN#GTEGQPQAIEFR.T | 0.69  | 2.472 |
| R.YN#ATVYSQAAN#GTEGQPQAIEFR.T | 0.69  | 2.472 |
| K.VSDN#ESSN#YTYK.I            | 0.84  | 1.217 |
| K.VSDN#ESSN#YTYK.I            | 0.84  | 1.217 |
| K.IHVAGETDSSNLN#VSEPR.A       | -0.76 | 2.122 |
| K.GPN#GTEGASR.T               | 0.11  | 3.683 |
| K.QTDVIN#ASWWVM*SN#K.T        | -0.02 | 1.472 |
| K.QTDVIN#ASWWVM*SN#K.T        | -0.02 | 1.472 |
| R.SAN#ASFNIK.W                | -9.83 | 2.452 |
| R.ATVFAN#GSLLLTQVRPR.N        | -4.77 | 3.108 |
| R.RQDVN#ITVATVPSWLK.K         | -0.63 | 4.174 |
| R.VTRDDAGN#YTCIASN#GPQGQIR.A  | -4.53 | 2.612 |
| R.VTRDDAGN#YTCIASN#GPQGQIR.A  | -4.53 | 2.612 |

|                                    |       |       |
|------------------------------------|-------|-------|
| R.KVEAEALN#ATAIR.V                 | -0.91 | 2.837 |
| R.YGEN#NSLSVEGFRK.L                | 3.09  | 5.437 |
| R.KTN#ESVSEPRK.G                   | -1    | 3.348 |
| R.NTNENPQECFN#ASK.L                | 0.89  | 1.476 |
| K.LLTSHGM*GIQVPLN#ATEFNYLCPAIINQIE | 0.35  | 4.372 |
| R.N#FSSCSAEDFEK.L                  | 2.68  | 1.185 |
| K.YRDFQHLLN#R.T                    | 0.02  | 4.288 |
| K.TCIMEASTDFLPGLN#FSN#CSR.R        | -3.24 | 2.345 |
| K.TCIMEASTDFLPGLN#FSN#CSR.R        | -3.24 | 2.345 |
| R.N#LTEVPTDLPAYVR.N                | -0.36 | 4.5   |
| R.QLDLSHNPLADLSPFAFSGSN#ASVSAPSPL' | 3.04  | 3.456 |
| R.QLDLSHNPLADLSPFAFSGSN#ASVSAPSPL' | 2.1   | 1.683 |
| R.QLDLSHNPLADLSPFAFSGSN#ASVSAPSPL' | 3.04  | 3.456 |
| R.N#LTHLESLHLEDNALK.V              | 0.19  | 5.172 |
| K.VLHN#GTLAELQGLPHIR.V             | -1.08 | 6.98  |
| R.LNLSEN#YTLSISNAR.I               | -0.09 | 4.615 |
| K.LGDCISEDSYPDGN#ITWYR.N           | 0.19  | 1.836 |
| K.EGDN#ITLK.C                      | -0.28 | 1.069 |
| R.RN#ATGDYK.C                      | -0.08 | 2.004 |
| R.N#ATVVWM*K.D                     | 2.87  | 2.184 |
| K.IIISPEEN#VTLTCTAENQLER.T         | -0.04 | 5.09  |
| R.TVNSLN#VSANENR.E                 | -8.7  | 3.44  |
| R.FLSDFRDLM*SWIN#GIR.G             | 2.16  | 2.763 |
| K.LAFAFGDRN#CSTITLQN#ITR.G         | -0.1  | 5.731 |
| K.KLAFAFGDRN#CSTITLQN#ITR.G        | 0.5   | 7.236 |
| K.DTGELN#VTSILDREETPFLLTGYALDAR.C  | 0.12  | 5.433 |
| K.IN#ATDADEPNTLNSK.I               | -0.23 | 2.946 |
| R.YVQN#GTYTVK.I                    | -0.3  | 3.929 |
| R.LAGAGN#STAR.I                    | 1.3   | 2.375 |
| K.NDRN#SSDETFLK.D                  | -1.04 | 4.386 |
| R.GN#VTQHVQGHR.N                   | -0.3  | 3.739 |
| K.STN#GSK.Q                        | -0.29 | 2.354 |
| R.NPN#GTVTVISR.Y                   | -0.14 | 2.683 |
| K.GVEAQN#R.T                       | -0.73 | 2.729 |
| R.RIAVDWESLGYN#ITR.C               | 0.2   | 3.506 |
| R.GHN#ESK.A                        | -0.87 | 1.262 |
| K.APQHVVNHLPPYTN#VSLK.M            | 4.15  | 4.717 |
| K.FIN#CTK.I                        | 1.12  | 2.373 |
| K.MEDGLLTCHGPGPDN#CTK.C            | -0.09 | 3.518 |
| R.SYSTTYEERN#ITGTR.V               | -0.01 | 3.04  |
| K.ENLPGDPTSN#ATSR.G                | -0.71 | 2.048 |
| K.QPVSPVIHPPVSYN#DTAPR.I           | 3     | 4.337 |
| K.GQTEIQVNCPPAVTEN#K.T             | -0.2  | 1.987 |

|                                  |        |       |
|----------------------------------|--------|-------|
| R.N#ITLTWR.Q                     | -3.88  | 2.899 |
| R.AKPQQQWAEDVLGN#KTWDRETR.D      | 0      | 3.535 |
| R.VCEIHEDN#STR.S                 | -2.09  | 3.028 |
| R.TVPPMVN#VTR.S                  | 1.76   | 2.716 |
| R.SEASEGN#ITVTCR.A               | -0.51  | 1.895 |
| K.FRNPLVN#GSLALAFQGTAPPPNWR.R    | 10.82  | 7.523 |
| R.RPVYELSPDPN#NTGFINQDFVWVM*R.T  | -3.98  | 4.302 |
| R.IRQGN#YSAGLPR.G                | -0.66  | 4.843 |
| R.GAYRVN#ITYNYPVR.A              | -0.77  | 3.865 |
| R.ESRPPGPGPGN#TTR.F              | -0.46  | 3.955 |
| K.NIN#GTDPIQK.Y                  | -0.42  | 2.634 |
| K.GNPYSDLGN#HTTCR.Y              | -0.19  | 1.937 |
| K.N#VTNQIALLK.L                  | -0.65  | 3.465 |
| K.NNFN#CTR.R                     | -5.46  | 2.439 |
| R.VISAGGN#DSR.S                  | 0.3    | 2.002 |
| R.ISWEEYN#RTNTR.V                | -0.31  | 3.067 |
| R.CEPTFVN#TSR.S                  | -0.44  | 1.304 |
| R.KN#SSQAR.D                     | -1.1   | 2.034 |
| K.ATVSIN#DSVSDLPK.M              | 6.64   | 1.987 |
| R.STNN#NTK.F                     | -0.08  | 2.481 |
| K.VLGQSQEPNVNPASAGN#QTQK.T       | -0.2   | 1.867 |
| K.TFLHYDCGN#K.T                  | -10.72 | 1.868 |
| K.QLVHSFAEGQDQGSAYAN#R.T         | 2.17   | 2.435 |
| R.TALFPDLLAQGN#ASLR.L            | 1.5    | 5.566 |
| R.VVLGAN#GTYSCLVR.N              | 0.3    | 2.795 |
| R.DQGSAYAN#R.T                   | -0.24  | 3.123 |
| K.QVLAN#K.S                      | -0.33  | 2.686 |
| R.LHEITN#ETFR.G                  | 0.17   | 2.882 |
| K.KLN#VTTAWK.A                   | -0.17  | 5.874 |
| R.LYGYSLGN#ISSNLISFTEVDDAETLHK.S | -1.24  | 5.844 |
| K.DLVVQQLVN#VSRGN#TSGVLVVLTK.F   | 4.99   | 5.128 |
| R.GN#TSGVLVVLTK.F                | 0.09   | 2.422 |
| K.NITLERPSN#VN#LTCQFTTSGDLNAV#VT | 7.07   | 3.485 |
| K.NITLERPSN#VN#LTCQFTTSGDLNAV#VT | 7.07   | 3.485 |
| K.NITLERPSN#VN#LTCQFTTSGDLNAV#VT | 7.07   | 3.485 |
| K.YVIN#GTYAN#ETK.L               | 1.07   | 3.314 |
| K.YVIN#GTYAN#ETK.L               | 1.07   | 3.314 |
| K.DN#GTFSCAVK.N                  | 8.75   | 1.289 |
| K.EVPRN#DTCPELPPPEWGWR.T         | -1.02  | 4.846 |
| K.TNN#STCQPCPYGSYSN#GSDCTR.C     | -0.01  | 3.634 |
| K.TNN#STCQPCPYGSYSN#GSDCTR.C     | -0.01  | 3.634 |
| R.TFNYN#FSALANTVTLAGGPSFTSK.G    | 3.8    | 1.321 |
| K.GN#GTILK.G                     | 0.32   | 1.725 |

|                                    |       |       |
|------------------------------------|-------|-------|
| R.TQDEILFSN#STR.L                  | -0.37 | 2.403 |
| K.IN#YTV PQSGTFK.I                 | 5.3   | 2.83  |
| R.QVYAN#R.S                        | 0.22  | 1.988 |
| R.KEDFN#QTLTSNEQTSR.A              | -7.52 | 2.082 |
| R.N#MSCSIN#NTLLGQKK.E              | 1.7   | 4.036 |
| R.N#MSCSIN#NTLLGQKK.E              | 1.7   | 4.036 |
| R.TN#QSIM*VQWQPPPETEHNGVLR.G       | -1.04 | 3.43  |
| K.N#LTSHTK.Y                       | -0.18 | 2.172 |
| K.GFN#ASYIR.V                      | -0.47 | 2.234 |
| K.NN#ESLDEGLR.L                    | -1.11 | 3.951 |
| K.DWSQNMVFN#CSEDNPSRER.C           | 0.99  | 2.286 |
| R.AAGN#TSESQSCAR.S                 | -1.39 | 4.373 |
| K.GVLMVGN#ETTYEDGHGSRKN#ITDLVEG/   | 0.57  | 3.728 |
| K.N#ITDLVEGAK.K                    | -1.11 | 1.999 |
| K.TCNPETFPSSN#ESR.Q                | -0.39 | 5.22  |
| K.DSCN#DSFR.G                      | -0.27 | 2.483 |
| R.TFAVYLN#STGYR.T                  | 1.09  | 2.375 |
| R.FYN#YTLCR.N                      | -0.35 | 3.039 |
| R.N#LTQPEVIIQPSSR.H                | 4.47  | 3.186 |
| R.N#VSECFLAR.E                     | 4.18  | 3.001 |
| K.TDN#GTYR.C                       | -7.85 | 1.148 |
| R.AGAIN#ATYK.V                     | 0.34  | 2.026 |
| K.N#LTLWCR.S                       | 0.38  | 2.943 |
| K.GIGN#YSCSYR.L                    | 3.92  | 3.921 |
| K.NYPGTYPN#HTVCEK.T                | -1.49 | 3.474 |
| K.GHPNLCVQVN#SSEK.L                | 1.71  | 1.441 |
| K.QEAKEN#GTN#LTFIGDK.T             | -0.13 | 2.389 |
| K.QEAKEN#GTN#LTFIGDK.T             | -0.13 | 2.389 |
| R.RN#ASAVVLYNEER.Y                 | 0.02  | 3.69  |
| K.VIAPGGHCIHEN#QTC DPEIFN#TTEIAK.A | -2.24 | 2.922 |
| K.VIAPGGHCIHEN#QTC DPEIFN#TTEIAK.A | -2.24 | 2.922 |
| R.LFGPGFAN#SSWSWVAPEGAGCREEAASPA   | -0.32 | 1.93  |
| R.QTLFFN#GTR.A                     | 5.58  | 3.834 |
| R.WN#RGNESLPER.A                   | -0.63 | 4.073 |
| R.WNRGN#ESLPER.A                   | -6.15 | 2.26  |
| K.DGGLPSLQSN#ATVR.V                | 0.23  | 1.735 |
| K.N#TSGSNQQAFLLENVPCNN#ASCEEARR.M  | 4.96  | 4.006 |
| K.N#TSGSNQQAFLLENVPCNN#ASCEEARR.M  | 4.96  | 4.006 |
| K.GEAVTRRGAFWN#SVRSVSR.C           | 1.28  | 1.26  |
| R.TTLVDNNTWNN#SHIALVGK.A           | -0.03 | 2.716 |
| K.DFRDM*N#QTLGDN#ITVK.M            | 1.99  | 2.338 |
| K.DFRDM*N#QTLGDN#ITVK.M            | 1.99  | 2.338 |
| K.SN#ITFNNN#DTVSFLEYR.T            | -0.62 | 5.071 |

|                                    |       |       |
|------------------------------------|-------|-------|
| K.SN#ITFN#DTVSFLEYR.T              | -0.62 | 5.071 |
| R.CAPVN#ISCYAK.F                   | 0.14  | 3.588 |
| K.AGN#TTESK.I                      | -0.65 | 2.717 |
| R.KFN#TTER.V                       | -1.21 | 1.693 |
| R.ELYN#GTADITLR.F                  | 8.46  | 3.79  |
| K.HMLALAPN#STAR.R                  | 0.68  | 2.759 |
| R.TSLELWM*HTDPVSQKN#ESVR.N         | 0.06  | 4.161 |
| R.RPN#QSQPLPPSSLQR.F               | -0.56 | 1.443 |
| K.DLYEYSWVQGPHSN#ETDRLPR.C         | 1.09  | 5.311 |
| R.FN#HTQTIQQK.Q                    | -0.54 | 1.945 |
| R.ERPPTFLTPEGN#ASNK.E              | 0.96  | 4.873 |
| R.VNVVN#STLAEVHWDPVPLK.S           | -0.39 | 4.496 |
| K.NLN#FSTR.Y                       | -2.53 | 2.794 |
| R.AAN#YTSSLNLPDK.T                 | 4.88  | 1.967 |
| R.CGN#GTLPAYN#GSECR.S              | -0.14 | 1.958 |
| R.CGN#GTLPAYN#GSECR.S              | -0.14 | 1.958 |
| R.SFAGPGAPFPMN#R.S                 | 2.9   | 3.621 |
| K.TMFN#STDIK.L                     | 2.09  | 2.104 |
| R.FSADLGYN#GTR.Q                   | -0.66 | 4.023 |
| K.CLSEGQPPPSYN#WTR.L               | -0.15 | 1.583 |
| R.ITFKPIAPSGQN#ATCTR.Y             | 4.28  | 2.757 |
| K.SGILRN#DSTVPDQFQCK.L             | 4.29  | 2.752 |
| K.DITDLIN#NTFIR.T                  | 0.92  | 4.376 |
| K.GVAVTN#TSK.L                     | -0.48 | 2.328 |
| R.QRYPAN#CTVR.D                    | -3.5  | 3.531 |
| R.LLGN#SSR.A                       | -0.61 | 1.936 |
| -.M*YN#GSCCR.I                     | 0.27  | 1.368 |
| R.FQLLN#FSSSELK.V                  | -0.34 | 3.41  |
| K.VSLTN#VSISSDEGR.Y                | 5.67  | 4.015 |
| K.SPAN#GSLGPTLN#LSSGESR.L          | 0.25  | 2.898 |
| K.SPAN#GSLGPTLN#LSSGESR.L          | 0.25  | 2.898 |
| K.GRVPPGDSPPGN#GSGPR.H             | 0.06  | 1.254 |
| K.NN#QTECFNFIR.F                   | 3.55  | 4.095 |
| R.FLQPYN#ASHLYVCGTYAFQPK.C         | 1.56  | 3.247 |
| R.DPYCAWSVN#TSR.C                  | -0.28 | 1.453 |
| K.APPRN#YSVIVMFTALQLHR.Q           | 6.45  | 6.879 |
| K.NTN#SSNN#FSR.S                   | -4.05 | 2.58  |
| K.NTN#SSNN#FSR.S                   | -4.05 | 2.58  |
| K.SDPHWESMLN#ATTR.R                | -0.01 | 3.344 |
| R.YKPDTLAVAVEN#GTGTDR.Q            | -0.21 | 2.305 |
| K.LAWEGN#ETVTTR.L                  | -0.99 | 2.338 |
| R.FLN#ATCDEYFTRN#NVTEIQGIPGAASGLIF | 0.72  | 2.564 |
| R.FLNATCDEYFTRN#N#VTEIQGIPGAASGLIF | 0.72  | 2.336 |

|                                    |       |       |
|------------------------------------|-------|-------|
| R.FLNATCDEYFTRN#N#VTEIQGIPGAASGLIF | 0.72  | 2.336 |
| K.DFN#ETQLAR.I                     | -0.06 | 3.037 |
| R.VYGQNINN#ETWSR.I                 | -0.45 | 3.844 |
| K.IVASDSGKPSLN#QTALVR.V            | 1.97  | 3.632 |
| K.N#CTEPALHEFPNDIFTNEDRR.Q         | -0.97 | 4.103 |
| R.DCVSN#GSLGCPVR.L                 | -8.69 | 1.12  |
| R.GWSCTDN#STAQTVAQQR.A             | 0.3   | 2.113 |
| R.LLDRNDNPPVLGNFEILFNN#YVTNR.S     | 0.27  | 6.704 |
| R.LLDRNDNPPVLGNFEILFNNYVTN#R.S     | 0.53  | 9.089 |
| R.GNELSLVLLN#ASTGELK.L             | 2.56  | 4.733 |
| R.FGSVLGN#YSCAAQGTQGGSKK.S         | 1.28  | 5.352 |
| R.HIDM*ADFIANN#GTVPGCPAK.K         | 7.41  | 2.113 |
| R.LHGLHLSN#ITVGGIPGPAGGVAR.G       | -1.13 | 5.644 |
| K.GFDPDCN#K.T                      | -0.6  | 2.562 |
| R.GWLPPNLFN#CTSITFSELK.G           | 4.17  | 1.812 |
| R.LQRN#ESGLDSGR.S                  | -0.29 | 4.394 |
| R.N#ATQHTAGYFGSDVK.V               | -0.1  | 2     |
| R.AGPN#GTLFVADAYK.G                | -0.01 | 2.477 |
| K.DVLWFRPTLLN#DTGN#YTCMLR.N        | 8.73  | 4.961 |
| K.DVLWFRPTLLN#DTGN#YTCMLR.N        | 8.73  | 4.961 |
| R.N#TTYCSK.V                       | -0.83 | 2.247 |
| R.KIN#SSLQLPDR.V                   | -0.09 | 3.631 |
| K.CLSPDVTPCFCTIN#FTLEK.S           | -3.07 | 1.824 |
| R.YSLN#VTYNYPVHYFDGR.K             | 0.36  | 1.971 |
| K.DIGN#YSCAAQGTQTGSKK.S            | 2.14  | 4.152 |
| K.NVDMAGFIANN#GTR.E                | 3.73  | 3.286 |
| K.GFDPDCN#KTN#GQCQCK.E             | 3.51  | 1.204 |
| K.GFDPDCN#KTN#GQCQCK.E             | 3.51  | 1.204 |
| K.LSRN#ETQVDGAR.A                  | -0.56 | 3.212 |
| K.VFFNLVN#LTELVLVR.N               | -0.45 | 2.353 |
| K.N#GSTEIYGECGVCPR.G               | 1.28  | 2.133 |
| R.ETCSGN#SSQCAPNIHK.M              | 0.41  | 1.053 |
| K.N#VSVAEGK.E                      | -0.28 | 3.152 |
| K.ELDLTCN#ITTDRAADDVRPEVTWSFSR.M   | -0.03 | 4.501 |
| K.QRN#NSWVK.S                      | -7.53 | 2.158 |
| R.YSVLIMAIEKPVGDLSSPN#ETK.Y        | 1.54  | 5.405 |
| K.LEN#WTDASR.V                     | 4.43  | 1.804 |
| K.SELVN#ETR.W                      | -0.19 | 2.927 |
| R.AQPGTMSN#GTETR.G                 | -0.76 | 1.261 |
| R.KMSN#ITFLNFDPPIEEFHQYYQHIVTTLVK. | 0.19  | 5.349 |
| K.DGSRN#ITLR.T                     | 3.15  | 1.923 |
| K.ILESERFDTHEYRN#ESR.R             | 7.31  | 3.252 |
| K.TTN#SSAADPR.E                    | -0.34 | 3.322 |

|                                  |       |       |
|----------------------------------|-------|-------|
| R.QN#GSLSK.I                     | -0.63 | 1.506 |
| K.EINN#MTVPSK.L                  | 1.08  | 2.739 |
| R.WGAEGRDVCAAN#GSGGDEGPDPDLICR.N | 3.2   | 2.711 |
| K.LSGN#LTLLR.A                   | -0.7  | 3.744 |
| K.YN#YTEDPTILR.I                 | 0.67  | 2.542 |
| R.GLSGLTQVLLNVLTLNRN#LSDSLAR.G   | 0.5   | 7.439 |
| R.LGTLPPSPMLLSM*NEMTLVSHACYPLFKD | -4.15 | 2.065 |
| R.LGTLPPSPMLLSM*NEMTLVSHACYPLFKD | -4.15 | 2.065 |
| K.DLNEDDHHHECLN#VTQLLK.Y         | -0.36 | 3.815 |
| K.RTFLN#TTVEK.H                  | 0.96  | 3.459 |
| R.CLHN#GTCVDLVGGFR.C             | 1.16  | 5.129 |
| K.N#CSSWSDK.N                    | 4.38  | 2.025 |
| R.SPIVTHCN#VSTVNK.G              | 0.31  | 4.235 |
| K.GIQEIIQM*N#K.S                 | 9.01  | 1.714 |
| K.FPVHGAGELCVGQN#TSDK.G          | 4     | 3.437 |
| R.RGN#ISAVAVR.F                  | -0.33 | 3.066 |
| K.INLN#ESMQVVSRR                 | 6.55  | 4.349 |
| K.AN#FTIYDCSR.T                  | -0.4  | 2.817 |
| R.VFGSQN#LTTVK.L                 | -4.82 | 3.61  |
| K.N#ATLAEQAK.L                   | 0.9   | 2.771 |
| K.DKN#GTRAEPPLN#ASASDQGEK.V      | -0.44 | 3.591 |
| R.AEPPLN#ASASDQGEK.V             | -0.43 | 1.757 |
| R.LLN#LTNPEASTSVLM*AVTHTLTQYPDFR | 1.46  | 2.59  |
| R.GFSTQVLLGDVYQSPCTMAQRPNFN#SSA  | 0.22  | 2.322 |
| R.CDGWADCTDHSDELN#CSCDAGHQFTCK.N | 4.96  | 4.449 |
| K.N#ASNMEYR.I                    | -0.16 | 3.06  |
| K.AN#ATIEVK.A                    | -0.43 | 3.155 |
| K.EN#GMPMDIVN#TSGR.F             | 1.78  | 3.222 |
| K.EN#GMPMDIVN#TSGR.F             | 1.78  | 3.222 |
| K.N#SSQVLGEK.V                   | -0.49 | 2.211 |
| K.DN#ITAHNISWR.N                 | 9.44  | 3.883 |
| R.N#LTVSECK.K                    | 7.06  | 2.652 |



























---

**Annotation**

---

ANO9\_HUMAN Anoctamin-9  
F1712\_HUMAN Protein FAM171A2  
K132L\_HUMAN UPF0577 protein KIAA1324-like  
CA233\_HUMAN Fibronectin type-III domain-containing transmembrane protein C1orf233  
PODXL\_HUMAN Podocalyxin  
LPP1\_HUMAN Lipid phosphate phosphohydrolase 1  
ARI1A\_HUMAN AT-rich interactive domain-containing protein 1A  
ARI1A\_HUMAN AT-rich interactive domain-containing protein 1A  
ADA10\_HUMAN Disintegrin and metalloproteinase domain-containing protein 10  
ADA10\_HUMAN Disintegrin and metalloproteinase domain-containing protein 10  
NRP1\_HUMAN Neuropilin-1  
NRP1\_HUMAN Neuropilin-1  
PLXB2\_HUMAN Plexin-B2  
LAMA5\_HUMAN Laminin subunit alpha-5  
LAMA5\_HUMAN Laminin subunit alpha-5  
LAMA5\_HUMAN Laminin subunit alpha-5  
TMPS2\_HUMAN Transmembrane protease serine 2  
NCAM2\_HUMAN Neural cell adhesion molecule 2  
NCAM2\_HUMAN Neural cell adhesion molecule 2  
NCAM2\_HUMAN Neural cell adhesion molecule 2  
TLR3\_HUMAN Toll-like receptor 3  
TLR3\_HUMAN Toll-like receptor 3  
TLR3\_HUMAN Toll-like receptor 3  
PLXB1\_HUMAN Plexin-B1  
GPR39\_HUMAN G-protein coupled receptor 39  
LPP2\_HUMAN Lipid phosphate phosphohydrolase 2  
MPZL2\_HUMAN Myelin protein zero-like protein 2  
TLR2\_HUMAN Toll-like receptor 2  
TSN3\_HUMAN Tetraspanin-3  
TSN3\_HUMAN Tetraspanin-3  
H2B1K\_HUMAN Histone H2B type 1-K  
RAMP3\_HUMAN Receptor activity-modifying protein 3  
IGSF3\_HUMAN Immunoglobulin superfamily member 3

IGSF3\_HUMAN Immunoglobulin superfamily member 3  
IGSF3\_HUMAN Immunoglobulin superfamily member 3  
IGSF3\_HUMAN Immunoglobulin superfamily member 3  
IGSF3\_HUMAN Immunoglobulin superfamily member 3  
IGSF3\_HUMAN Immunoglobulin superfamily member 3  
ICOSL\_HUMAN ICOS ligand  
ICOSL\_HUMAN ICOS ligand  
ATRN\_HUMAN Attractin  
ATRN\_HUMAN Attractin  
ATRN\_HUMAN Attractin  
ATRN\_HUMAN Attractin  
TSN9\_HUMAN Tetraspanin-9  
CBPD\_HUMAN Carboxypeptidase D  
S22A5\_HUMAN Solute carrier family 22 member 5  
S22A5\_HUMAN Solute carrier family 22 member 5  
ACL6B\_HUMAN Actin-like protein 6B  
PRS23\_HUMAN Serine protease 23  
S1PR2\_HUMAN Sphingosine 1-phosphate receptor 2  
UNC5C\_HUMAN Netrin receptor UNC5C  
CSPG5\_HUMAN Chondroitin sulfate proteoglycan 5  
LYPD3\_HUMAN Ly6/PLAUR domain-containing protein 3  
MPZL1\_HUMAN Myelin protein zero-like protein 1  
TSN13\_HUMAN Tetraspanin-13  
TSN15\_HUMAN Tetraspanin-15  
1A02\_HUMAN HLA class I histocompatibility antigen, A-2 alpha chain  
TFR1\_HUMAN Transferrin receptor protein 1  
PRIO\_HUMAN Major prion protein  
G3P\_HUMAN Glyceraldehyde-3-phosphate dehydrogenase  
G3P\_HUMAN Glyceraldehyde-3-phosphate dehydrogenase  
ERBB2\_HUMAN Receptor tyrosine-protein kinase erbB-2  
ERBB2\_HUMAN Receptor tyrosine-protein kinase erbB-2  
ERBB2\_HUMAN Receptor tyrosine-protein kinase erbB-2  
AT1B1\_HUMAN Sodium/potassium-transporting ATPase subunit beta-1  
AT1B1\_HUMAN Sodium/potassium-transporting ATPase subunit beta-1  
AT1B1\_HUMAN Sodium/potassium-transporting ATPase subunit beta-1  
PAI2\_HUMAN Plasminogen activator inhibitor 2



4F2\_HUMAN 4F2 cell-surface antigen heavy chain  
4F2\_HUMAN 4F2 cell-surface antigen heavy chain  
4F2\_HUMAN 4F2 cell-surface antigen heavy chain  
NEP\_HUMAN Neprilysin  
NEP\_HUMAN Neprilysin  
ITA5\_HUMAN Integrin alpha-5  
CD63\_HUMAN CD63 antigen  
CSF1\_HUMAN Macrophage colony-stimulating factor 1  
TACD2\_HUMAN Tumor-associated calcium signal transducer 2  
TACD2\_HUMAN Tumor-associated calcium signal transducer 2  
TACD2\_HUMAN Tumor-associated calcium signal transducer 2  
PTPRF\_HUMAN Receptor-type tyrosine-protein phosphatase F  
CLUS\_HUMAN Clusterin  
CLUS\_HUMAN Clusterin  
LAMC1\_HUMAN Laminin subunit gamma-1  
GTR1\_HUMAN Solute carrier family 2, facilitated glucose transporter member 1  
LAMP1\_HUMAN Lysosome-associated membrane glycoprotein 1  
FGFR1\_HUMAN Fibroblast growth factor receptor 1  
MPRI\_HUMAN Cation-independent mannose-6-phosphate receptor  
MPRI\_HUMAN Cation-independent mannose-6-phosphate receptor  
ACE\_HUMAN Angiotensin-converting enzyme  
ACE\_HUMAN Angiotensin-converting enzyme  
LAMP2\_HUMAN Lysosome-associated membrane glycoprotein 2  
CD59\_HUMAN CD59 glycoprotein  
PVR\_HUMAN Poliovirus receptor  
INGR1\_HUMAN Interferon gamma receptor 1

CD44\_HUMAN CD44 antigen  
ITB4\_HUMAN Integrin beta-4  
EPCAM\_HUMAN Epithelial cell adhesion molecule  
EPCAM\_HUMAN Epithelial cell adhesion molecule  
EPCAM\_HUMAN Epithelial cell adhesion molecule  
INAR1\_HUMAN Interferon alpha/beta receptor 1  
INAR1\_HUMAN Interferon alpha/beta receptor 1  
ITA2\_HUMAN Integrin alpha-2  
ITB5\_HUMAN Integrin beta-5  
ITB6\_HUMAN Integrin beta-6  
LFA3\_HUMAN Lymphocyte function-associated antigen 3  
TNR1A\_HUMAN Tumor necrosis factor receptor superfamily member 1A  
MPRD\_HUMAN Cation-dependent mannose-6-phosphate receptor  
MPRD\_HUMAN Cation-dependent mannose-6-phosphate receptor  
5NTD\_HUMAN 5'-nucleotidase  
5NTD\_HUMAN 5'-nucleotidase  
FGFR2\_HUMAN Fibroblast growth factor receptor 2  
ERBB3\_HUMAN Receptor tyrosine-protein kinase erbB-3  
ERBB3\_HUMAN Receptor tyrosine-protein kinase erbB-3  
ERBB3\_HUMAN Receptor tyrosine-protein kinase erbB-3  
CD9\_HUMAN CD9 antigen  
CADH3\_HUMAN Cadherin-3  
ENPP1\_HUMAN Ectonucleotide pyrophosphatase/phosphodiesterase family member 1  
ENPP1\_HUMAN Ectonucleotide pyrophosphatase/phosphodiesterase family member 1  
ENPP1\_HUMAN Ectonucleotide pyrophosphatase/phosphodiesterase family member 1  
ITA6\_HUMAN Integrin alpha-6  
ITA6\_HUMAN Integrin alpha-6  
ACKR3\_HUMAN Atypical chemokine receptor 3  
TNR6\_HUMAN Tumor necrosis factor receptor superfamily member 6  
TNR6\_HUMAN Tumor necrosis factor receptor superfamily member 6  
ITA3\_HUMAN Integrin alpha-3  
ITB8\_HUMAN Integrin beta-8  
CD82\_HUMAN CD82 antigen

CALX\_HUMAN Calnexin  
EPHB2\_HUMAN Ephrin type-B receptor 2  
1B15\_HUMAN HLA class I histocompatibility antigen, B-15 alpha chain  
CTR1\_HUMAN High affinity cationic amino acid transporter 1  
CTR1\_HUMAN High affinity cationic amino acid transporter 1  
CALCR\_HUMAN Calcitonin receptor  
L1CAM\_HUMAN Neural cell adhesion molecule L1  
L1CAM\_HUMAN Neural cell adhesion molecule L1  
L1CAM\_HUMAN Neural cell adhesion molecule L1  
GPC1\_HUMAN Glypican-1  
BASI\_HUMAN Basigin  
BASI\_HUMAN Basigin  
BASI\_HUMAN Basigin  
TNR3\_HUMAN Tumor necrosis factor receptor superfamily member 3  
IL6RB\_HUMAN Interleukin-6 receptor subunit beta  
ECE1\_HUMAN Endothelin-converting enzyme 1  
CD151\_HUMAN CD151 antigen  
CD151\_HUMAN CD151 antigen  
CD97\_HUMAN CD97 antigen  
CD97\_HUMAN CD97 antigen  
CD97\_HUMAN CD97 antigen  
SERPH\_HUMAN Serpin H1  
BCAM\_HUMAN Basal cell adhesion molecule  
CLCN5\_HUMAN H(+)/Cl(-) exchange transporter 5  
CLCN5\_HUMAN H(+)/Cl(-) exchange transporter 5  
PLXA3\_HUMAN Plexin-A3  
CTR2\_HUMAN Low affinity cationic amino acid transporter 2  
EFNA3\_HUMAN Ephrin-A3  
PTTG\_HUMAN Pituitary tumor-transforming gene 1 protein-interacting protein  
AT1B3\_HUMAN Sodium/potassium-transporting ATPase subunit beta-3  
AT1B3\_HUMAN Sodium/potassium-transporting ATPase subunit beta-3  
S12A2\_HUMAN Solute carrier family 12 member 2

S12A2\_HUMAN Solute carrier family 12 member 2  
LAMB2\_HUMAN Laminin subunit beta-2  
LAMB2\_HUMAN Laminin subunit beta-2  
FOXP1\_HUMAN Forkhead box protein G1  
GFRA1\_HUMAN GDNF family receptor alpha-1  
GFRA1\_HUMAN GDNF family receptor alpha-1  
GFRA1\_HUMAN GDNF family receptor alpha-1  
CLD12\_HUMAN Claudin-12  
JAG1\_HUMAN Protein jagged-1  
ADA17\_HUMAN Disintegrin and metalloproteinase domain-containing protein 17  
IL13R1\_HUMAN Interleukin-13 receptor subunit alpha-1  
PGBM\_HUMAN Basement membrane-specific heparan sulfate proteoglycan core protein  
DSC2\_HUMAN Desmocollin-2  
DSC2\_HUMAN Desmocollin-2  
UPAR\_HUMAN Urokinase plasminogen activator surface receptor  
NOTCH2\_HUMAN Neurogenic locus notch homolog protein 2  
LRP1\_HUMAN Prolow-density lipoprotein receptor-related protein 1  
PCDH1\_HUMAN Protocadherin-1  
IL10R2\_HUMAN Interleukin-10 receptor subunit beta  
IL10R2\_HUMAN Interleukin-10 receptor subunit beta  
CD47\_HUMAN Leukocyte surface antigen CD47  
CD47\_HUMAN Leukocyte surface antigen CD47  
PTPRJ\_HUMAN Receptor-type tyrosine-protein phosphatase eta  
TSN31\_HUMAN Tetraspanin-31  
TSN31\_HUMAN Tetraspanin-31  
PTK7\_HUMAN Inactive tyrosine-protein kinase 7  
PTK7\_HUMAN Inactive tyrosine-protein kinase 7

PTPRS\_HUMAN Receptor-type tyrosine-protein phosphatase S  
S39A6\_HUMAN Zinc transporter ZIP6  
S39A6\_HUMAN Zinc transporter ZIP6  
S39A6\_HUMAN Zinc transporter ZIP6  
S39A6\_HUMAN Zinc transporter ZIP6  
ADAM9\_HUMAN Disintegrin and metalloproteinase domain-containing protein 9  
ADA15\_HUMAN Disintegrin and metalloproteinase domain-containing protein 15  
ADA15\_HUMAN Disintegrin and metalloproteinase domain-containing protein 15  
ADA15\_HUMAN Disintegrin and metalloproteinase domain-containing protein 15  
TPBG\_HUMAN Trophoblast glycoprotein  
CD166\_HUMAN CD166 antigen  
CD166\_HUMAN Isoform 2 of CD166 antigen  
SPTN1\_HUMAN Spectrin alpha chain, non-erythrocytic 1  
DAG1\_HUMAN Dystroglycan  
DAG1\_HUMAN Dystroglycan  
DSG2\_HUMAN Desmoglein-2  
DSG2\_HUMAN Desmoglein-2  
DSG2\_HUMAN Desmoglein-2  
S29A2\_HUMAN Equilibrative nucleoside transporter 2  
GPNMB\_HUMAN Transmembrane glycoprotein NMB  
S39AE\_HUMAN Zinc transporter ZIP14  
PVRL1\_HUMAN Poliovirus receptor-related protein 1  
PVRL1\_HUMAN Poliovirus receptor-related protein 1  
PVRL1\_HUMAN Poliovirus receptor-related protein 1  
PTPRK\_HUMAN Receptor-type tyrosine-protein phosphatase kappa  
PTPRK\_HUMAN Receptor-type tyrosine-protein phosphatase kappa  
PTPRK\_HUMAN Receptor-type tyrosine-protein phosphatase kappa  
ERBB4\_HUMAN Receptor tyrosine-protein kinase erbB-4  
ERBB4\_HUMAN Receptor tyrosine-protein kinase erbB-4  
AAAT\_HUMAN Neutral amino acid transporter B(0)  
EFNB3\_HUMAN Ephrin-B3  
VAS1\_HUMAN V-type proton ATPase subunit S1  
SYPL1\_HUMAN Synaptophysin-like protein 1

MICB\_HUMAN MHC class I polypeptide-related sequence B  
MICA\_HUMAN MHC class I polypeptide-related sequence A  
CC50B\_HUMAN Cell cycle control protein 50B  
F174B\_HUMAN Membrane protein FAM174B  
ANO6\_HUMAN Anoctamin-6  
ANO6\_HUMAN Anoctamin-6  
NADL2\_HUMAN Inactive N-acetylated-alpha-linked acidic dipeptidase-like protein 2  
NADL2\_HUMAN Inactive N-acetylated-alpha-linked acidic dipeptidase-like protein 2  
SDK2\_HUMAN Protein sidekick-2  
SDK2\_HUMAN Protein sidekick-2  
MKS3\_HUMAN Meckelin  
ENTP8\_HUMAN Ectonucleoside triphosphate diphosphohydrolase 8  
FREM2\_HUMAN FRAS1-related extracellular matrix protein 2  
CAHD1\_HUMAN VWFA and cache domain-containing protein 1  
GP107\_HUMAN Protein GPR107  
RET1L\_HUMAN Retinoic acid early transcript 1L protein  
CD276\_HUMAN CD276 antigen  
CD276\_HUMAN CD276 antigen  
CD276\_HUMAN CD276 antigen  
CD276\_HUMAN CD276 antigen  
STEA3\_HUMAN Metalloreductase STEAP3  
VASN\_HUMAN Vasorin  
RET1G\_HUMAN Retinoic acid early transcript 1G protein  
CNNM4\_HUMAN Metal transporter CNNM4  
CNNM4\_HUMAN Metal transporter CNNM4  
CNNM4\_HUMAN Metal transporter CNNM4  
EMB\_HUMAN Embigin  
EMB\_HUMAN Embigin  
EMB\_HUMAN Embigin  
EMB\_HUMAN Embigin  
EMB\_HUMAN Embigin  
MPZL3\_HUMAN Myelin protein zero-like protein 3  
SE6L2\_HUMAN Seizure 6-like protein 2  
K1324\_HUMAN UPF0577 protein KIAA1324  
K1324\_HUMAN UPF0577 protein KIAA1324  
K1324\_HUMAN UPF0577 protein KIAA1324  
NPNT\_HUMAN Nephronectin

CD109\_HUMAN CD109 antigen  
CD109\_HUMAN CD109 antigen  
THSD4\_HUMAN Thrombospondin type-1 domain-containing protein 4  
TMM26\_HUMAN Transmembrane protein 26  
BT2A1\_HUMAN Butyrophilin subfamily 2 member A1  
BT2A1\_HUMAN Butyrophilin subfamily 2 member A1  
SDK1\_HUMAN Protein sidekick-1  
SDK1\_HUMAN Protein sidekick-1  
GP126\_HUMAN G-protein coupled receptor 126  
GP126\_HUMAN G-protein coupled receptor 126  
TSN33\_HUMAN Tetraspanin-33  
OSTM1\_HUMAN Osteopetrosis-associated transmembrane protein 1  
CTL2\_HUMAN Choline transporter-like protein 2  
CTL2\_HUMAN Choline transporter-like protein 2  
CTL2\_HUMAN Choline transporter-like protein 2  
LRC8A\_HUMAN Leucine-rich repeat-containing protein 8A  
SULF2\_HUMAN Extracellular sulfatase Sulf-2  
SULF2\_HUMAN Extracellular sulfatase Sulf-2  
VSI10\_HUMAN V-set and immunoglobulin domain-containing protein 10  
PROM2\_HUMAN Prominin-2  
CADM2\_HUMAN Cell adhesion molecule 2  
FGRL1\_HUMAN Fibroblast growth factor receptor-like 1  
IGSF1\_HUMAN Immunoglobulin superfamily member 1  
IGSF1\_HUMAN Immunoglobulin superfamily member 1  
DCBD1\_HUMAN Discoidin, CUB and LCCL domain-containing protein 1  
IL17RC\_HUMAN Interleukin-17 receptor C  
TM87A\_HUMAN Transmembrane protein 87A  
TM87A\_HUMAN Transmembrane protein 87A  
RNF149\_HUMAN E3 ubiquitin-protein ligase RNF149  
CTL5\_HUMAN Choline transporter-like protein 5  
CTL5\_HUMAN Choline transporter-like protein 5  
CNNM3\_HUMAN Metal transporter CNNM3  
CADM4\_HUMAN Cell adhesion molecule 4  
CADM4\_HUMAN Cell adhesion molecule 4  
CADM4\_HUMAN Cell adhesion molecule 4  
PCD19\_HUMAN Protocadherin-19  
TIP\_HUMAN T-cell immunomodulatory protein  
TIP\_HUMAN T-cell immunomodulatory protein  
MIEAP\_HUMAN Mitochondria-eating protein  
STT3B\_HUMAN Dolichyl-diphosphooligosaccharide--protein glycosyltransferase subunit STT3E  
SPP2A\_HUMAN Signal peptide peptidase-like 2A  
SPP2A\_HUMAN Signal peptide peptidase-like 2A  
SCR1\_HUMAN Scavenger receptor class B member 1

SCRB1\_HUMAN Scavenger receptor class B member 1  
CTL1\_HUMAN Choline transporter-like protein 1  
LIPH\_HUMAN Lipase member H  
MUC16\_HUMAN Mucin-16  
PIEZ1\_HUMAN Piezo-type mechanosensitive ion channel component 1  
PIEZ1\_HUMAN Piezo-type mechanosensitive ion channel component 1  
NICA\_HUMAN Nicastrin  
NICA\_HUMAN Nicastrin  
NICA\_HUMAN Nicastrin  
NRCAM\_HUMAN Neuronal cell adhesion molecule  
SEM4D\_HUMAN Semaphorin-4D  
CA159\_HUMAN Uncharacterized protein C1orf159  
CA159\_HUMAN Uncharacterized protein C1orf159  
CA159\_HUMAN Uncharacterized protein C1orf159  
TM87B\_HUMAN Transmembrane protein 87B  
PCFT\_HUMAN Proton-coupled folate transporter  
PVRL4\_HUMAN Poliovirus receptor-related protein 4  
MYCT\_HUMAN Proton myo-inositol cotransporter  
PANX1\_HUMAN Pannexin-1  
SORT\_HUMAN Sortilin  
P2RX4\_HUMAN P2X purinoceptor 4  
TM2D3\_HUMAN TM2 domain-containing protein 3  
LRFN3\_HUMAN Leucine-rich repeat and fibronectin type-III domain-containing protein 3  
HCAR1\_HUMAN Hydroxycarboxylic acid receptor 1  
CADM1\_HUMAN Cell adhesion molecule 1  
CADM1\_HUMAN Cell adhesion molecule 1  
ABCA2\_HUMAN ATP-binding cassette sub-family A member 2  
ABCA2\_HUMAN ATP-binding cassette sub-family A member 2  
RTN4R\_HUMAN Reticulon-4 receptor  
SEM4C\_HUMAN Semaphorin-4C  
SEM4C\_HUMAN Semaphorin-4C  
SEM4C\_HUMAN Semaphorin-4C  
MAGT1\_HUMAN Magnesium transporter protein 1  
ITFG3\_HUMAN Protein ITFG3  
ITFG3\_HUMAN Protein ITFG3  
ITFG3\_HUMAN Protein ITFG3  
ITFG3\_HUMAN Protein ITFG3  
S12A5\_HUMAN Solute carrier family 12 member 5  
S12A5\_HUMAN Solute carrier family 12 member 5  
S12A5\_HUMAN Solute carrier family 12 member 5

S12A5\_HUMAN Solute carrier family 12 member 5  
ANTR1\_HUMAN Anthrax toxin receptor 1  
CNNM2\_HUMAN Metal transporter CNNM2  
PCDH9\_HUMAN Protocadherin-9  
NCKX3\_HUMAN Sodium/potassium/calcium exchanger 3  
TMM8A\_HUMAN Transmembrane protein 8A  
TMM8A\_HUMAN Transmembrane protein 8A  
CELR2\_HUMAN Cadherin EGF LAG seven-pass G-type receptor 2  
APMAP\_HUMAN Adipocyte plasma membrane-associated protein  
IL1AP\_HUMAN Interleukin-1 receptor accessory protein  
IL1AP\_HUMAN Interleukin-1 receptor accessory protein  
IL1AP\_HUMAN Interleukin-1 receptor accessory protein  
SEM4B\_HUMAN Semaphorin-4B  
CC50A\_HUMAN Cell cycle control protein 50A  
CC50A\_HUMAN Cell cycle control protein 50A  
CELR1\_HUMAN Cadherin EGF LAG seven-pass G-type receptor 1  
FLRT3\_HUMAN Leucine-rich repeat transmembrane protein FLRT3  
JKAMP\_HUMAN JNK1/MAPK8-associated membrane protein  
ADA22\_HUMAN Disintegrin and metalloproteinase domain-containing protein 22  
FPRP\_HUMAN Prostaglandin F2 receptor negative regulator  
SUSD2\_HUMAN Sushi domain-containing protein 2  
SUSD2\_HUMAN Sushi domain-containing protein 2  
PCYOX\_HUMAN Prenylcysteine oxidase 1  
TMEM2\_HUMAN Transmembrane protein 2  
TMEM2\_HUMAN Transmembrane protein 2  
TMEM2\_HUMAN Transmembrane protein 2

TMEM2\_HUMAN Transmembrane protein 2  
S12A6\_HUMAN Solute carrier family 12 member 6  
SO3A1\_HUMAN Solute carrier organic anion transporter family member 3A1  
PLXA1\_HUMAN Plexin-A1  
PLXA1\_HUMAN Plexin-A1  
GGT7\_HUMAN Gamma-glutamyltransferase 7  
TINAG\_HUMAN Isoform 2 of Tubulointerstitial nephritis antigen  
TINAG\_HUMAN Isoform 2 of Tubulointerstitial nephritis antigen  
S39AA\_HUMAN Zinc transporter ZIP10  
HEG1\_HUMAN Protein HEG homolog 1  
NOTC3\_HUMAN Neurogenic locus notch homolog protein 3  
S6A14\_HUMAN Sodium- and chloride-dependent neutral and basic amino acid transporter B(0+)  
S6A14\_HUMAN Sodium- and chloride-dependent neutral and basic amino acid transporter B(0+)  
S6A14\_HUMAN Sodium- and chloride-dependent neutral and basic amino acid transporter B(0+)  
FZD1\_HUMAN Frizzled-1  
PLXD1\_HUMAN Plexin-D1  
PLXD1\_HUMAN Plexin-D1  
PLXD1\_HUMAN Plexin-D1  
HYOU1\_HUMAN Hypoxia up-regulated protein 1  
ENTP2\_HUMAN Ectonucleoside triphosphate diphosphohydrolase 2  
ENTP2\_HUMAN Ectonucleoside triphosphate diphosphohydrolase 2  
ST14\_HUMAN Suppressor of tumorigenicity 14 protein  
NPTN\_HUMAN Neuroplastin  
NPTN\_HUMAN Neuroplastin  
NPTN\_HUMAN Neuroplastin  
NPTN\_HUMAN Neuroplastin  
GPR56\_HUMAN G-protein coupled receptor 56  
S4A7\_HUMAN Sodium bicarbonate cotransporter 3  
S4A7\_HUMAN Sodium bicarbonate cotransporter 3



























**Table S8 - The Half-Lives of 386 Unique Glycosylation**

| <b>Uniprot ID</b> | <b>Gene Symbol</b> | <b>Site</b> | <b>ModScore</b> | <b>ModScore Peptide</b> |
|-------------------|--------------------|-------------|-----------------|-------------------------|
| A1A5B4            | ANO9               | 641         | 1000            | K.EGN#STVDCLK.G         |
| A8MWY0            | KIAA1324L          | 560         | 1000            | K.N#ATFTFTWAFQR.T       |
| F2Z333            | C1orf233           | 109         | 1000            | R.AFALN#CSWR.G          |
| O14494            | PPAP2A             | 142         | 1000            | K.IN#CSDGYIEYYICR.G     |
| O14672            | ADAM10             | 439         | 1000            | R.N#ISQVLEK.K           |
| O14786            | NRP1               | 150         | 1000            | K.RGPECSQN#YTTPSGVIK.S  |
| O14786            | NRP1               | 522         | 24.44           | K.IGYSNN#GSDWK.M        |
| O15031            | PLXNB2             | 127         | 1000            | R.ALSN#ISLR.L           |
| O15031            | PLXNB2             | 528         | 1000            | K.SCVAVTSAQPQN#MSR.R    |
| O15031            | PLXNB2             | 733         | 1000            | K.LSHDAN#ETLPLHLYVK.S   |
| O15031            | PLXNB2             | 844         | 1000            | R.N#CSFQPER.Y           |
| O15031            | PLXNB2             | 1049        | 1000            | R.EAESLQPM*TVVGTDYVFE   |
| O15230            | LAMA5              | 2196        | 1000            | R.GIN#ASSMAWAR.L        |
| O15230            | LAMA5              | 2423        | 1000            | R.KQELSRDN#ATLQATLHAA   |
| O15230            | LAMA5              | 3107        | 1000            | K.RLN#TTGVSAGCTADLLVC   |
| O15393            | TMPRSS2            | 213         | 22.49           | K.LN#TSAGNVDIYKK.L      |
| O15394            | NCAM2              | 219         | 1000            | K.SFN#ATAERGEEMTFSCR.A  |
| O15394            | NCAM2              | 474         | 39.66           | R.YN#CTATNHIGTR.F       |
| O15394            | NCAM2              | 562         | 18.81           | R.SHGVQTM*VVLNNLEPN#I   |
| O43157            | PLXNB1             | 1253        | 1000            | K.YTLDPN#ITSAGPTK.S     |
| O43194            | GPR39              | 192         | 1000            | R.GLTCN#R.S             |
| O43688            | PPAP2C             | 139         | 1000            | R.VN#CSVYVQLEK.V        |
| O60487            | MPZL2              | 39          | 1000            | R.VLEAVN#GTDAR.L        |
| O60603            | TLR2               | 414         | 73.31           | K.N#LTNIDISK.N          |
| O60637            | TSPAN3             | 127         | 37.54           | K.TYN#GTNPDAASR.A       |
| O60814            | HIST1H2BK          | 64          | 20.17           | K.AMGIMN#SFDNDIFER.I    |
| O60896            | RAMP3              | 103         | 1000            | R.QFFSN#CTVDR.V         |
| O75054            | IGSF3              | 101         | 1000            | R.VQGN#STLLHITDLQAR.D   |
| O75054            | IGSF3              | 655         | 24.44           | K.NYN#NTWTR.L           |
| O75054            | IGSF3              | 700         | 52.73           | K.RTLTLVENKPIQLN#CSVK.! |
| O75054            | IGSF3              | 825         | 1000            | R.LSQAQGN#LSVLETR.Q     |
| O75054            | IGSF3              | 842         | 1000            | R.QVQLECVVLN#R.T        |
| O75054            | IGSF3              | 961         | 1000            | K.RAEDTAGQTALTVMRPDA    |
| O75144            | ICOSLG             | 70          | 22.49           | K.TVVTYHIPQN#SSLENVDSF  |
| O75144            | ICOSLG             | 102         | 1000            | R.LFN#VTPQDEQK.F        |
| O75882            | ATRN               | 1073        | 1000            | K.CIN#QSICEK.C          |
| O75882            | ATRN               | 1082        | 1000            | K.CEN#LTTGK.H           |
| O75954            | TSPAN9             | 180         | 1000            | R.N#ATTPLWR.T           |
| O76082            | SLC22A5            | 57          | 1000            | R.CRVPDAAN#LSSAWR.N     |
| O76082            | SLC22A5            | 91          | 1000            | R.LATIAN#FSALGLEPGR.D   |

|        |         |     |        |                          |
|--------|---------|-----|--------|--------------------------|
| O94805 | ACTL6B  | 159 | 1000   | K.TAVLTAFAN#GR.S         |
| O95084 | PRSS23  | 207 | 1000   | R.GAN#DSTSAMPEQMK.F      |
| O95136 | S1PR2   | 19  | 1000   | K.VQEHYN#YTK.E           |
| O95196 | CSPG5   | 355 | 1000   | R.DLASSEN#GTECR.S        |
| O95274 | LYPD3   | 118 | 1000   | K.LN#LTSR.A              |
| O95274 | LYPD3   | 163 | 1000   | R.EACQGTSPPVVSCYN#ASD    |
| O95274 | LYPD3   | 227 | 39.66  | R.CNSDLRN#K.T            |
| O95297 | MPZL1   | 50  | 1000   | K.EIFVAN#GTQ GK.L        |
| O95857 | TSPAN13 | 137 | 17.01  | R.SVNPN#DTCLASCVK.S      |
| O95858 | TSPAN15 | 189 | 71.75  | R.N#TTEVVNTMCGYK.T       |
| P01892 | HLA-A   | 110 | 1000   | R.GYYN#QSEAGSHTVQR.M     |
| P02786 | TFRC    | 251 | 1000   | K.DFEDLYTPVN#GSIVIVR.A   |
| P02786 | TFRC    | 727 | 84.61  | R.KQNNGAFN#ETLFR.N       |
| P04156 | PRNP    | 197 | 1000   | K.QHTVTTTTTKGEN#FTETDV   |
| P04406 | GAPDH   | 9   | 1000   | K.VGVN#GFGR.I            |
| P04406 | GAPDH   | 225 | 1000   | K.VIPELN#GK.L            |
| P04626 | ERBB2   | 530 | 1000   | R.GHCWGP GPTQCVN#CSQFI   |
| P05026 | ATP1B1  | 158 | 71.95  | R.FKLEWLGN#CSGLNDETYC    |
| P05026 | ATP1B1  | 193 | 1000   | R.VLGFKPKPPKN#ESLETYPV   |
| P05026 | ATP1B1  | 265 | 1000   | K.YLQPLLA VQFTN#LTM*DT   |
| P05362 | ICAM1   | 145 | 1000   | R.AN#LTVVLLR.G           |
| P05362 | ICAM1   | 267 | 78.16  | R.LNPTVTYGN#DSFSAK.A     |
| P05556 | ITGB1   | 212 | 67.17  | K.LRNPTCTSEQN#CTSPFSYK.I |
| P05556 | ITGB1   | 406 | 73.31  | K.NGVN#GTGENGR.K         |
| P05556 | ITGB1   | 481 | 1000   | K.CHEGN#GTFEFCGACR.C     |
| P05556 | ITGB1   | 520 | 107.32 | R.KEN#SSEICSNNGECVCGQC   |
| P05556 | ITGB1   | 669 | 1000   | K.KDTCTQECSYFN#ITKVESE   |
| P06213 | INSR    | 920 | 1000   | R.GLSPGN#YSVR.I          |
| P06280 | GLA     | 215 | 1000   | R.SIVYSCEWPLYM*WPFQKP    |
| P06731 | CEACAM5 | 152 | 13.38  | R.VYPELPKPSISSN#NSKPVEI  |
| P06731 | CEACAM5 | 204 | 1000   | R.TLTLFN#VTR.N           |
| P06731 | CEACAM5 | 246 | 75.74  | R.RSDSVILNVLYGPDAPTISP]  |
| P06731 | CEACAM5 | 375 | 48.87  | R.LQLSNDN#R.T            |
| P06731 | CEACAM5 | 508 | 27.06  | K.TITVSAELPKPSISSN#NSKP  |
| P06731 | CEACAM5 | 665 | 24.44  | R.N#NSIVK.S              |
| P06756 | ITGAV   | 74  | 1000   | K.AN#TTQPGIVEGGQVLK.C    |
| P06756 | ITGAV   | 554 | 1000   | K.N#MTISR.G              |
| P06756 | ITGAV   | 704 | 1000   | R.LSCAFKTEN#QTR.Q        |
| P06756 | ITGAV   | 874 | 1000   | K.ISSLQTTEKN#DTVAGQGEI   |
| P07339 | CTSD    | 263 | 1000   | K.GSLSYLN#VTRK.A         |
| P07602 | PSAP    | 101 | 1000   | K.TCDWLPKPN#MSASCK.E     |
| P08069 | IGF1R   | 244 | 66.98  | K.RACTENNECCHPECLGSCS    |
| P08069 | IGF1R   | 747 | 1000   | R.DVM*QVAN#TTMSSR.S      |

|        |         |      |        |                         |
|--------|---------|------|--------|-------------------------|
| P08069 | IGF1R   | 900  | 53.53  | R.LNPGN#YTAR.I          |
| P08069 | IGF1R   | 913  | 1000   | R.IQATSLSGN#GSWTDVPVFFY |
| P08174 | CD55    | 95   | 1000   | K.GSQWSDIEEFCN#R.S      |
| P08195 | SLC3A2  | 365  | 1000   | K.DASSFLAEWQN#ITK.G     |
| P08195 | SLC3A2  | 381  | 128.04 | K.GFSEDRLLIAGTN#SSDLQC  |
| P08195 | SLC3A2  | 424  | 44.28  | K.SLVTQYLN#ATGNR.W      |
| P08473 | MME     | 145  | 1000   | R.SCIN#ESAIDSR.G        |
| P08473 | MME     | 285  | 38.18  | K.EIAN#ATAKPEDRNDPMLL   |
| P08648 | ITGA5   | 593  | 1000   | K.IYLRN#ESEFRDK.L       |
| P08648 | ITGA5   | 773  | 24.44  | K.NLN#NSQSDVVSFR.L      |
| P08648 | ITGA5   | 868  | 27.12  | R.VTGLN#CTTNHPINPK.G    |
| P09758 | TACSTD2 | 120  | 70.91  | K.ARQCNC#QTSVCWCVNSVG   |
| P09758 | TACSTD2 | 168  | 1000   | R.HRPTAGAFN#HSDLDAELR   |
| P09758 | TACSTD2 | 208  | 1000   | K.FVAHVHYEQPTIQIELRQN#  |
| P10586 | PTPRF   | 966  | 64.40  | R.DINSQQELQN#ITTDTR.F   |
| P10909 | CLU     | 86   | 1000   | K.KKEDALN#ETRESETK.L    |
| P10909 | CLU     | 291  | 1000   | R.EIRHN#STGCLR.M        |
| P11047 | LAMC1   | 1022 | 25.17  | R.EGFVGNRCQCEENYFYN#    |
| P11047 | LAMC1   | 1107 | 24.44  | R.VN#NTLSSQISR.L        |
| P11047 | LAMC1   | 1380 | 44.28  | R.RVNDN#K.T             |
| P11047 | LAMC1   | 1395 | 29.67  | R.KIPAIN#QTITEANEK.T    |
| P11047 | LAMC1   | 1439 | 1000   | K.N#ATSTK.A             |
| P11166 | SLC2A1  | 45   | 1000   | K.VIEEFYN#QTWVHR.Y      |
| P11279 | LAMP1   | 84   | 1000   | R.SSCGKEN#TSDPSLVIAFGR  |
| P11279 | LAMP1   | 103  | 1000   | R.GHTLTLN#FTR.N         |
| P11279 | LAMP1   | 249  | 1000   | R.KDN#TTVTR.L           |
| P11279 | LAMP1   | 307  | 1000   | R.FFLQGIQLN#TILPDARDPAI |
| P11362 | FGFR1   | 317  | 1000   | K.TAGVN#TTDK.E          |
| P11717 | IGF2R   | 2085 | 1000   | K.GYPCGGN#K.T           |
| P12821 | ACE     | 146  | 97.60  | K.RQQYNALLSN#MSR.I      |
| P12821 | ACE     | 695  | 39.66  | K.NMQIAN#HTLK.Y         |
| P13473 | LAMP2   | 49   | 1000   | K.WQM*N#FTVR.Y          |
| P13473 | LAMP2   | 58   | 1000   | R.YETTN#K.T             |
| P13473 | LAMP2   | 101  | 1000   | K.IAVQFGPGFSWIAN#FTK.A  |
| P13473 | LAMP2   | 275  | 1000   | R.LN#SSTIK.Y            |
| P13473 | LAMP2   | 356  | 1000   | R.VQPFN#VTQGK.Y         |
| P13987 | CD59    | 43   | 1000   | K.TAVN#CSSDFDACLITK.A   |
| P15151 | PVR     | 105  | 1000   | R.LGAELRN#ASLR.M        |
| P15260 | IFNGR1  | 179  | 1000   | R.MN#GSEIQYK.I          |
| P16070 | CD44    | 57   | 1000   | K.AFN#STLPTM*AQMEK.A    |
| P16144 | ITGB4   | 695  | 1000   | R.CSFRDEDDDDCTYSYTMEGI  |
| P16422 | EPCAM   | 74   | 1000   | K.AEMN#GSK.L            |
| P16422 | EPCAM   | 111  | 53.71  | K.QCN#GTSMCWCVNTAGVR    |

|        |        |      |        |                         |
|--------|--------|------|--------|-------------------------|
| P17181 | IFNAR1 | 81   | 1000   | K.LSGCQN#ITSTK.C        |
| P17181 | IFNAR1 | 172  | 1000   | K.N#SSGVEER.I           |
| P17301 | ITGA2  | 105  | 65.26  | K.LNLQTSTSIPN#VTEM*K.T  |
| P17301 | ITGA2  | 343  | 1000   | R.YFFN#VSDEAALLEK.A     |
| P17301 | ITGA2  | 1057 | 1000   | R.TASCSN#VTCWLK.D       |
| P17301 | ITGA2  | 1074 | 1000   | K.GEYFVN#VTTR.I         |
| P18564 | ITGB6  | 463  | 1000   | K.EVEVN#SSK.C           |
| P19256 | CD58   | 169  | 1000   | R.N#STSIYFK.M           |
| P20645 | M6PR   | 57   | 1000   | K.RLKPLFN#K.S           |
| P20645 | M6PR   | 83   | 106.40 | R.EAGN#HTSGAGLVQINK.S   |
| P21589 | NT5E   | 53   | 1000   | K.CVN#ASR.C             |
| P21589 | NT5E   | 333  | 1000   | K.LDN#YSTQELGK.T        |
| P21860 | ERBB3  | 437  | 48.87  | K.NLN#VTSLGFR.S         |
| P21860 | ERBB3  | 522  | 1000   | K.VCDPLCSSGGCWGPGPGQ    |
| P21926 | CD9    | 151  | 1000   | K.AIHVALN#CCGLAGGVEQF   |
| P22223 | CDH3   | 566  | 1000   | R.QVLN#ITDK.D           |
| P22413 | ENPP1  | 285  | 1000   | K.MN#ASFSLK.S           |
| P22413 | ENPP1  | 341  | 1000   | K.MYN#GSVPFEER.I        |
| P22413 | ENPP1  | 477  | 16.27  | R.N#LSCREPNQHFKPYLK.H   |
| P23229 | ITGA6  | 966  | 47.05  | R.KYQTLN#CSVNVNVCNIR.C  |
| P25445 | FAS    | 118  | 1000   | R.LCDEGHGLEVEIN#CTR.T   |
| P25445 | FAS    | 136  | 36.70  | R.CKPNFFCN#STVCEHCDCP   |
| P26006 | ITGA3  | 107  | 1000   | R.MN#ITVK.N             |
| P26006 | ITGA3  | 265  | 1000   | K.N#ITIVTGAPR.H         |
| P26006 | ITGA3  | 511  | 1000   | R.RN#ITLAYTLEADRDR.R    |
| P26006 | ITGA3  | 656  | 24.24  | K.LLLSIN#VTNTR.T        |
| P26006 | ITGA3  | 969  | 37.54  | R.TSIPTINMEN#K.T        |
| P26012 | ITGB8  | 466  | 50.81  | R.N#CSCQCEDNRGPK.G      |
| P27701 | CD82   | 198  | 1000   | K.GFCEAPGN#R.T          |
| P29323 | EPHB2  | 482  | 1000   | K.ELSEYN#ATAIK.S        |
| P30464 | HLA-B  | 110  | 1000   | R.GYYN#QSEAGSHTLQR.M    |
| P30825 | SLC7A1 | 226  | 142.63 | K.NWQLTEEDFGN#TSGR.L    |
| P30825 | SLC7A1 | 235  | 24.44  | R.LCLNN#DTK.E           |
| P30988 | CALCR  | 91   | 1000   | R.MQQLPAYQGEGPYCN#R.T   |
| P32004 | L1CAM  | 294  | 20.17  | R.VTYQNH#K.T            |
| P32004 | L1CAM  | 671  | 1000   | K.VPGN#QTSTTLK.L        |
| P32004 | L1CAM  | 849  | 1000   | R.GYN#VTYWR.E           |
| P35052 | GPC1   | 116  | 1000   | R.SFDDHFQHLLN#DSER.T    |
| P35613 | BSG    | 160  | 1000   | K.ILLTCSLN#DSATEVTGHR.V |
| P35613 | BSG    | 268  | 1000   | K.ALM*N#GSESR.F         |
| P35613 | BSG    | 302  | 1000   | R.CN#GTSSK.G            |
| P36941 | LTBR   | 177  | 1000   | K.AGHFQN#TSSPSAR.C      |
| P40189 | IL6ST  | 83   | 1000   | K.EQYTIIN#R.T           |

|        |          |      |        |                        |
|--------|----------|------|--------|------------------------|
| P40189 | IL6ST    | 131  | 104.48 | K.N#LSCIVNEGK.K        |
| P42892 | ECE1     | 166  | 1000   | K.HLLEN#STASVSEAERK.A  |
| P42892 | ECE1     | 187  | 1000   | R.ACM*N#ETRIEELR.A     |
| P42892 | ECE1     | 210  | 1000   | R.LGGWN#ITGPWAK.D      |
| P42892 | ECE1     | 249  | 17.01  | K.NSN#SNVIQVDQSGGLPSI  |
| P42892 | ECE1     | 270  | 1000   | R.DYYLN#K.T            |
| P42892 | ECE1     | 539  | 1000   | R.FFN#FSWR.V           |
| P42892 | ECE1     | 632  | 1000   | K.N#SSVEAFKR.Q         |
| P42892 | ECE1     | 651  | 40.36  | K.RQTECMVEQYSN#YSVNGI  |
| P48960 | CD97     | 108  | 38.37  | K.TFKN#ESENTCQDVDECQC  |
| P48960 | CD97     | 371  | 1000   | R.GDKN#VTMGQSSAR.M     |
| P50454 | SERPINH1 | 120  | 1000   | R.SLSN#STAR.N          |
| P50895 | BCAM     | 439  | 1000   | R.TQN#FTLLVQGSPCLK.T   |
| P51795 | CLCN5    | 408  | 33.66  | K.LCDYENRFN#TSK.G      |
| P51805 | PLXNA3   | 59   | 1000   | K.LAPN#LTELR.A         |
| P52569 | SLC7A2   | 227  | 1000   | K.N#ISASAR.E           |
| P52797 | EFNA3    | 100  | 1000   | R.TCN#ASQGFKR.W        |
| P53801 | PTTG1IP  | 54   | 78.16  | K.N#VSCLWCNTNK.A       |
| P54709 | ATP1B3   | 124  | 1000   | K.FLKPYTLEEQKN#LTVCPDQ |
| P55268 | LAMB2    | 1249 | 1000   | R.N#TSAASTAQLVEATEELRI |
| P55268 | LAMB2    | 1348 | 119.27 | R.RAN#TSALAVPSPVSNAS/  |
| P56159 | GFRA1    | 59   | 1000   | R.QCVAGKETN#FSLASGLEA  |
| P56159 | GFRA1    | 152  | 24.44  | K.GN#NCLDAAK.A         |
| P56159 | GFRA1    | 406  | 20.99  | K.SN#VSGNTHLCISNGNYEK. |
| P56749 | CLDN12   | 47   | 1000   | K.N#LTVYTGWLWVK.C      |
| P78504 | JAG1     | 217  | 20.17  | R.DDFFGHYACDQNGN#K.T   |
| P78536 | ADAM17   | 103  | 1000   | K.VVVVDGKN#ESEYTVK.W   |
| P78536 | ADAM17   | 452  | 1000   | K.MFSN#CSK.Q           |
| P78536 | ADAM17   | 539  | 1000   | K.KCQEAIN#ATCK.G       |
| P78552 | IL13RA1  | 157  | 13.38  | R.NTSPDTN#YTLYYWHR.S   |
| P98160 | HSPG2    | 89   | 1000   | R.ALVN#FTR.S           |
| Q02487 | DSC2     | 392  | 1000   | R.AN#YTILK.G           |
| Q02487 | DSC2     | 629  | 1000   | K.AIN#DTAAR.L          |
| Q03405 | PLAUR    | 194  | 1000   | K.CCN#TTK.C            |
| Q04721 | NOTCH2   | 46   | 32.22  | R.DGYEPCVNEGMCVITYHN#  |
| Q07954 | LRP1     | 357  | 1000   | R.CDMDGQN#R.T          |
| Q07954 | LRP1     | 2521 | 1000   | R.AVN#SSCR.A           |
| Q07954 | LRP1     | 3333 | 1000   | R.TCVSN#CTASQFVCK.N    |
| Q07954 | LRP1     | 4364 | 1000   | K.QSGDVTN#CTDGR.V      |
| Q08174 | PCDH1    | 305  | 26.89  | K.AN#DSDQGANAIEIYTFHQ  |
| Q08334 | IL10RB   | 49   | 1000   | K.GN#LTFTAQYLSYR.I     |
| Q08334 | IL10RB   | 161  | 1000   | K.N#GTDEK.F            |
| Q08722 | CD47     | 73   | 1000   | K.GRDIYTFDGALN#K.S     |

|          |          |      |        |                         |
|----------|----------|------|--------|-------------------------|
| Q08722   | CD47     | 111  | 1000   | K.MDKSDAVSHTGN#YTCEV    |
| Q12913   | PTPRJ    | 525  | 1000   | K.GPN#GTEGASR.T         |
| Q13308   | PTK7     | 116  | 97.75  | R.SAN#ASFNIK.W          |
| Q13308   | PTK7     | 283  | 1000   | R.ATVFAN#GSLLLTQVRPR.N  |
| Q13308   | PTK7     | 405  | 1000   | R.RQDVN#ITVATVPSWLK.K   |
| Q13332   | PTPRS    | 733  | 1000   | R.KVEAEALN#ATAIR.V      |
| Q13433   | SLC39A6  | 67   | 17.01  | R.YGEN#NSLSVEGFRK.L     |
| Q13433   | SLC39A6  | 241  | 1000   | K.TN#ESVSEPR.K          |
| Q13444   | ADAM15   | 237  | 1000   | K.YRDFQHLLN#R.T         |
| Q13641   | TPBG     | 81   | 1000   | R.N#LTEVPTDLPAYVR.N     |
| Q13641   | TPBG     | 256  | 132.25 | R.N#LTHLESLHLEDNALK.V   |
| Q13641   | TPBG     | 275  | 1000   | K.VLHN#GTLAELQGLPHIR.V  |
| Q13740   | ALCAM    | 95   | 76.73  | R.LNLSEN#YTLSISNAR.I    |
| Q13740   | ALCAM    | 167  | 1000   | K.KLGDCISEDSPDGN#ITW    |
| Q13740   | ALCAM    | 265  | 1000   | K.EGDN#ITLK.C           |
| Q13740   | ALCAM    | 306  | 1000   | R.RN#ATGDYK.C           |
| Q13740   | ALCAM    | 361  | 1000   | R.N#ATVVWM*K.D          |
| Q13740   | ALCAM    | 480  | 109.94 | K.IIISPEEN#VTLTCTAENQLE |
| Q13740-2 | ALCAM    | 499  | 76.73  | R.TVNSLN#VSANENR.E      |
| Q13813   | SPTAN1   | 1356 | 1000   | R.FLSDFRDLM*SWIN#GIR.G  |
| Q14126   | DSG2     | 112  | 1000   | K.DTGELN#VTSILDREETPFFI |
| Q14126   | DSG2     | 182  | 84.61  | K.IN#ATDADEPNTLNSK.I    |
| Q14126   | DSG2     | 462  | 1000   | R.YVQN#GTYTVK.I         |
| Q14542   | SLC29A2  | 48   | 1000   | R.LAGAGN#STAR.I         |
| Q14956   | GPNMB    | 249  | 35.78  | K.NDRN#SSDETFLK.D       |
| Q15043   | SLC39A14 | 77   | 1000   | R.GN#VTQHVQGHR.N        |
| Q15223   | PVRL1    | 72   | 1000   | K.STN#GSK.Q             |
| Q15223   | PVRL1    | 202  | 30.84  | R.NPN#GTVTVISR.Y        |
| Q15223   | PVRL1    | 297  | 1000   | K.GVEAQN#R.T            |
| Q15262   | PTPRK    | 416  | 1000   | R.IAVDWESLGYN#ITR.C     |
| Q15262   | PTPRK    | 462  | 65.25  | K.APQHVVNHLPPYTN#VSLK   |
| Q15303   | ERBB4    | 358  | 1000   | K.FIN#CTK.I             |
| Q15303   | ERBB4    | 576  | 1000   | K.MEDGLLTCHGPGPDN#CTK   |
| Q15758   | SLC1A5   | 212  | 1000   | R.SYSTTYEERN#ITGTR.V    |
| Q15768   | EFNB3    | 210  | 18.81  | K.ENLPGDPTSN#ATSR.G     |
| Q15904   | ATP6AP1  | 261  | 1000   | K.QPVSPVIHPPVSYN#DTAPR  |
| Q16563   | SYPL1    | 71   | 27.12  | K.GQTEIQVNCPPAVTEN#K.T  |
| Q29980   | MICB     | 234  | 1000   | R.N#ITLWR.Q             |
| Q29983   | MICA     | 79   | 1000   | R.AKPQGQWAEDVLGN#KTW    |
| Q29983   | MICA     | 125  | 1000   | R.VCEIHEDN#STR.S        |
| Q29983   | MICA     | 210  | 1000   | R.TVPPMVN#VTR.S         |
| Q29983   | MICA     | 220  | 1000   | R.SEASEGN#ITVTCR.A      |
| Q3MIR4   | TMEM30B  | 241  | 13.38  | R.RPVYELSPDPN#NTGFINQE  |

|        |          |      |        |                         |
|--------|----------|------|--------|-------------------------|
| Q3MIR4 | TMEM30B  | 273  | 1000   | R.IRQGN#YSAGLPR.G       |
| Q3MIR4 | TMEM30B  | 286  | 36.56  | R.GAYRVN#ITYNYPVR.A     |
| Q3ZCQ3 | FAM174B  | 53   | 1000   | R.ESRPPPGPGGN#TTR.F     |
| Q4KMQ2 | ANO6     | 493  | 30.84  | K.NIN#GTDPIQK.Y         |
| Q4KMQ2 | ANO6     | 802  | 29.67  | K.GNPYSDLGN#HTTCR.Y     |
| Q58DX5 | NAALADL2 | 295  | 37.54  | K.N#VTNQIALLK.L         |
| Q58DX5 | NAALADL2 | 556  | 48.87  | K.NNFN#CTR.R            |
| Q58EX2 | SDK2     | 577  | 1000   | R.VISAGGN#DSR.S         |
| Q58EX2 | SDK2     | 936  | 33.66  | R.ISWEEYN#RTNTR.V       |
| Q5HYA8 | TMEM67   | 179  | 1000   | R.CEPTFVN#TSR.S         |
| Q5MY95 | ENTPD8   | 135  | 1000   | R.KN#SSQAR.D            |
| Q5SZK8 | FREM2    | 2121 | 1000   | K.ATVSIN#DSVSDLPK.M     |
| Q5VU97 | CACHD1   | 329  | 24.44  | R.STNN#NTK.F            |
| Q5ZPR3 | CD276    | 91   | 1000   | K.QLVHSFAEGQDQGSAYAN    |
| Q5ZPR3 | CD276    | 104  | 1000   | R.TALFPDLLAQGN#ASLR.L   |
| Q5ZPR3 | CD276    | 215  | 1000   | R.VVLGAN#GTYSCLVR.N     |
| Q5ZPR3 | CD276    | 309  | 1000   | R.DQGSAYAN#R.T          |
| Q658P3 | STEAP3   | 344  | 1000   | K.QVLAN#K.S             |
| Q6EMK4 | VASN     | 117  | 1000   | R.LHEITN#ETFR.G         |
| Q6H3X3 | RAET1G   | 82   | 1000   | K.KLN#VTTAWK.A          |
| Q6P4Q7 | CNNM4    | 85   | 33.66  | R.LYGYSLGN#ISSNLISFTEVI |
| Q6P4Q7 | CNNM4    | 127  | 1000   | R.GN#TSGVLVVLTK.F       |
| Q6UXD5 | SEZ6L2   | 641  | 1000   | K.EVPRN#DTCPELPPPEWGW   |
| Q6UXI9 | NPNT     | 273  | 1000   | K.GN#GTILK.G            |
| Q6YHK3 | CD109    | 118  | 1000   | R.TQDEILFSN#STR.L       |
| Q6YHK3 | CD109    | 419  | 1000   | K.IN#YTVPQSGTFK.I       |
| Q6ZMP0 | THSD4    | 709  | 1000   | R.QVYAN#R.S             |
| Q6ZUK4 | TMEM26   | 110  | 52.40  | R.KEDFN#QTLTSNEQTSR.A   |
| Q7Z5N4 | SDK1     | 1767 | 1000   | K.N#LTSHTK.Y            |
| Q86SQ4 | GPR126   | 143  | 1000   | K.GFN#ASYIR.V           |
| Q86SQ4 | GPR126   | 505  | 24.44  | K.NN#ESLDEGLR.L         |
| Q86WC4 | OSTM1    | 135  | 1000   | R.AAGN#TSESQSCAR.S      |
| Q8IWA5 | SLC44A2  | 417  | 132.11 | K.TCNPETFPSSN#ESR.Q     |
| Q8IWT6 | LRRC8A   | 66   | 1000   | K.DSCN#DSFR.G           |
| Q8IWU5 | SULF2    | 132  | 1000   | R.TFAVYLN#STGYR.T       |
| Q8IWU5 | SULF2    | 171  | 1000   | R.FYN#YTLCR.N           |
| Q8N0Z9 | VSIG10   | 347  | 1000   | R.N#LTQPEVIIQPSSR.H     |
| Q8N271 | PROM2    | 725  | 1000   | R.N#VSECFLAR.E          |
| Q8N441 | FGFRL1   | 231  | 1000   | R.AGAIN#ATYK.V          |
| Q8N6C5 | IGSF1    | 607  | 1000   | K.N#LTLWCR.S            |
| Q8N6C5 | IGSF1    | 1223 | 1000   | K.GIGN#YSCSYR.L         |
| Q8N8Z6 | DCBLD1   | 64   | 47.57  | K.NYPGTYPN#HTVCEK.T     |
| Q8NC42 | RNF149   | 131  | 100.02 | R.RN#ASAVVLYNEER.Y      |

|        |          |       |        |                        |
|--------|----------|-------|--------|------------------------|
| Q8NE01 | CNNM3    | 73    | 1000   | R.LFGPGFAN#SSWSWVAPEG  |
| Q8NFZ8 | CADM4    | 67    | 1000   | R.QLFFN#GTR.A          |
| Q8TAB3 | PCDH19   | 546   | 1000   | K.DGGLPSLQSN#ATVR.V    |
| Q8WWI5 | SLC44A1  | 180   | 1000   | R.CAPVN#ISCYAK.F       |
| Q8WWY8 | LIPH     | 357   | 1000   | K.AGN#TTESK.I          |
| Q8WXI7 | MUC16    | 12416 | 1000   | R.KFN#TTER.V           |
| Q92508 | PIEZO1   | 2294  | 1000   | R.ELYN#GTADITLR.F      |
| Q92508 | PIEZO1   | 2331  | 1000   | K.HMLALAPN#STAR.R      |
| Q92542 | NCSTN    | 387   | 1000   | R.TSLELWM*HTDPVSQKN#E  |
| Q92542 | NCSTN    | 417   | 1000   | R.RPN#QSQPLPPSSLQR.F   |
| Q92542 | NCSTN    | 612   | 1000   | K.DLYEYSWVQGPLHSN#ETI  |
| Q92823 | NRCAM    | 223   | 1000   | R.FN#HTQTIQQK.Q        |
| Q92823 | NRCAM    | 276   | 45.03  | R.ERPPTFLTPEGN#ASNK.E  |
| Q92823 | NRCAM    | 858   | 28.93  | R.VNVVN#STLAEVHWDPVPI  |
| Q92823 | NRCAM    | 1019  | 48.87  | K.NLN#FSTR.Y           |
| Q92854 | SEMA4D   | 379   | 71.75  | R.AAN#YTSSLNLDPK.T     |
| Q96HA4 | C1orf159 | 128   | 1000   | R.SFAGPGAPFPMN#R.S     |
| Q96K49 | TMEM87B  | 68    | 1000   | K.TMFN#STDIK.L         |
| Q96NT5 | SLC46A1  | 58    | 1000   | R.FSADLGYN#GTR.Q       |
| Q96NY8 | PVRL4    | 281   | 1000   | K.CLSEGQPPPSYN#WTR.L   |
| Q96QE2 | SLC2A13  | 433   | 1000   | R.ITFKPIAPSGQN#ATCTR.Y |
| Q96RD7 | PANX1    | 255   | 1000   | K.SGILRN#DSTVPDQFQCK.L |
| Q99523 | SORT1    | 162   | 24.44  | K.DITDLIN#NTFIR.T      |
| Q99571 | P2RX4    | 75    | 1000   | K.GVAVTN#TSK.L         |
| Q9BRN9 | TM2D3    | 157   | 1000   | R.QRYPAN#CTVR.D        |
| Q9BTN0 | LRFN3    | 339   | 1000   | R.LLGN#SSR.A           |
| Q9BY67 | CADM1    | 101   | 1000   | R.FQLLN#FSSSELK.V      |
| Q9BY67 | CADM1    | 113   | 1000   | K.VSLTN#VSISSDEGR.Y    |
| Q9C0C4 | SEMA4C   | 106   | 24.44  | K.NN#QTECFNFIR.F       |
| Q9C0C4 | SEMA4C   | 121   | 1000   | R.FLQPYN#ASHLYVCGTYAF  |
| Q9C0C4 | SEMA4C   | 522   | 1000   | R.DPYCAWSVN#TSR.C      |
| Q9H0U3 | MAGT1    | 71    | 1000   | K.APPRN#YSVIVMFTALQLH  |
| Q9H0X4 | ITFG3    | 314   | 1000   | K.SDPHWESMLN#ATTR.R    |
| Q9H0X4 | ITFG3    | 389   | 1000   | R.YKPDTLAVAVEN#GTGTDF  |
| Q9H2X9 | SLC12A5  | 333   | 1000   | K.LAWEGN#ETVTTTR.L     |
| Q9H6X2 | ANTXR1   | 184   | 1000   | K.DFN#ETQLAR.I         |
| Q9H8M5 | CNNM2    | 112   | 24.44  | R.VYGQNINN#ETWSR.I     |
| Q9HC56 | PCDH9    | 450   | 1000   | K.IVASDSGKPSLN#QTALVR. |
| Q9HC58 | SLC24A3  | 86    | 31.60  | K.N#CTEPALHEFPNDIFTNED |
| Q9HCN3 | TMEM8A   | 535   | 1000   | R.GWSCTDN#STAQTVAQQR.  |
| Q9HCU4 | CELSR2   | 1036  | 20.17  | R.LLDRNDNPPVLGNFEILFN  |
| Q9HCU4 | CELSR2   | 1076  | 115.01 | R.GNELSLVLLN#ASTGELK.L |
| Q9HCU4 | CELSR2   | 1501  | 1000   | R.FGSVLGN#YSCAAQGTQGC  |

|        |          |      |       |                         |
|--------|----------|------|-------|-------------------------|
| Q9HCU4 | CELSR2   | 1741 | 1000  | R.LHGLHLSN#ITVGGIPGPAG  |
| Q9HCU4 | CELSR2   | 1900 | 1000  | K.GFDPDCN#K.T           |
| Q9HCU4 | CELSR2   | 2043 | 1000  | R.N#ESGLDSGR.S          |
| Q9HCU4 | CELSR2   | 2061 | 1000  | R.N#ATQHTAGYFGSDVK.V    |
| Q9HDC9 | APMAP    | 160  | 1000  | R.AGPN#GTLFVADAYK.G     |
| Q9NPH3 | IL1RAP   | 118  | 1000  | R.N#TTYCSK.V            |
| Q9NPR2 | SEMA4B   | 405  | 1000  | R.KIN#SSLQLPDR.V        |
| Q9NV96 | TMEM30A  | 107  | 1000  | K.CLSPDVTPCFCTIN#FTLEK. |
| Q9NYQ6 | CELSR1   | 1576 | 1000  | K.DIGN#YSCAAQGTQTGSKK   |
| Q9NYQ6 | CELSR1   | 2122 | 1000  | K.LSRN#ETQVDGAR.A       |
| Q9NZU0 | FLRT3    | 226  | 24.24 | K.VFFNLVN#LTELSLVR.N    |
| Q9P055 | JKAMP    | 37   | 1000  | K.N#GSTEIYGECGVCPR.G    |
| Q9P2B2 | PTGFRN   | 286  | 1000  | K.N#VSVAEGK.E           |
| Q9P2B2 | PTGFRN   | 300  | 1000  | K.ELDLTCN#ITDRADDVRPI   |
| Q9P2B2 | PTGFRN   | 600  | 1000  | R.YSVLIMAEKPVGDLSSPN#I  |
| Q9UGT4 | SUSD2    | 162  | 1000  | K.SELVN#ETR.W           |
| Q9UGT4 | SUSD2    | 494  | 1000  | R.AQPGTMSN#GTETR.G      |
| Q9UHG3 | PCYOX1   | 323  | 46.82 | R.KMSN#ITFLNFDPIIEFHQ'  |
| Q9UHN6 | TMEM2    | 171  | 1000  | K.DGSRN#ITLR.T          |
| Q9UHN6 | TMEM2    | 292  | 1000  | K.ILESERFDTHEYRN#ESR.R  |
| Q9UHN6 | TMEM2    | 739  | 1000  | K.TTN#SSAADPR.E         |
| Q9UHN6 | TMEM2    | 1092 | 1000  | R.QN#GSLSK.I            |
| Q9UIG8 | SLCO3A1  | 153  | 1000  | R.WGAEGRDVCAAN#GSGGE    |
| Q9UIW2 | PLXNA1   | 77   | 1000  | K.LSGN#LTLLR.A          |
| Q9UIW2 | PLXNA1   | 1043 | 1000  | K.YN#YTEDPTILR.I        |
| Q9ULF5 | SLC39A10 | 339  | 58.70 | K.DLNEDDHHHECLN#VTQLI   |
| Q9ULI3 | HEG1     | 1080 | 1000  | K.RTFLN#TTVEK.H         |
| Q9UM47 | NOTCH3   | 1179 | 1000  | R.CLHN#GTCVDLVGGFR.C    |
| Q9UN76 | SLC6A14  | 155  | 1000  | K.N#CSSWSDK.N           |
| Q9UN76 | SLC6A14  | 174  | 30.61 | R.SPIVTHCN#VSTVNK.G     |
| Q9UN76 | SLC6A14  | 189  | 1000  | K.GIQEIIQM*N#K.S        |
| Q9UP38 | FZD1     | 231  | 1000  | K.FPVHGAGELCVGQN#TSDK   |
| Q9Y4D7 | PLXND1   | 155  | 1000  | R.RGN#ISAVAVR.F         |
| Q9Y4D7 | PLXND1   | 500  | 48.87 | K.INLN#ESMQVVSRR        |
| Q9Y4D7 | PLXND1   | 696  | 1000  | K.AN#FTIYDCSR.T         |
| Q9Y4L1 | HYOU1    | 515  | 1000  | R.VFGSQN#LTTVK.L        |
| Q9Y4L1 | HYOU1    | 869  | 1000  | K.N#ATLAEQAK.L          |
| Q9Y4L1 | HYOU1    | 931  | 1000  | R.AEPPLN#ASASDQGEK.V    |
| Q9Y5L3 | ENTPD2   | 129  | 31.28 | R.LLN#LTNPEASTSVLMAVTI  |
| Q9Y5Y6 | ST14     | 485  | 1000  | R.CDGWADCTDHSDELN#CSO   |
| Q9Y639 | NPTN     | 197  | 73.31 | K.N#ASNMEYR.I           |
| Q9Y639 | NPTN     | 229  | 1000  | K.AN#ATIEVK.A           |
| Q9Y653 | GPR56    | 303  | 1000  | K.N#SSQVLGEK.V          |

|        |        |     |       |                  |
|--------|--------|-----|-------|------------------|
| Q9Y6M7 | SLC4A7 | 786 | 49.59 | K.DN#ITAHNISWR.N |
| Q9Y6M7 | SLC4A7 | 796 | 1000  | R.N#LTVSECK.K    |

## on Sites

| <b>Half-Life in Expt# 1 (h)</b> | <b>Half-Life in Expt# 2 (h)</b> | <b>Median Half-Life (h)</b> |
|---------------------------------|---------------------------------|-----------------------------|
| 14.59                           | N/A                             | 14.59                       |
| N/A                             | 150.64                          | 150.64                      |
| 20.43                           | N/A                             | 20.43                       |
| N/A                             | 15.81                           | 15.81                       |
| 22.42                           | 21.36                           | 21.89                       |
| 5.21                            | 6.38                            | 5.79                        |
| 5.11                            | 4.65                            | 4.88                        |
| 22.50                           | 19.55                           | 21.02                       |
| 104.50                          | 105.03                          | 104.76                      |
| 10.70                           | 12.57                           | 11.63                       |
| 21.23                           | N/A                             | 21.23                       |
| 11.29                           | 9.19                            | 10.24                       |
| 10.98                           | 10.45                           | 10.72                       |
| N/A                             | 32.23                           | 32.23                       |
| 24.32                           | 17.94                           | 21.13                       |
| 11.90                           | N/A                             | 11.90                       |
| 115.46                          | >200                            | 157.73                      |
| N/A                             | >200                            | >200                        |
| 82.15                           | 113.18                          | 97.66                       |
| 19.91                           | 13.34                           | 16.62                       |
| 40.55                           | N/A                             | 40.55                       |
| N/A                             | 48.15                           | 48.15                       |
| 14.10                           | 12.45                           | 13.28                       |
| 14.92                           | N/A                             | 14.92                       |
| 10.82                           | 11.02                           | 10.92                       |
| N/A                             | >200                            | >200                        |
| 18.74                           | 17.05                           | 17.90                       |
| >200                            | >200                            | >200                        |
| 109.50                          | N/A                             | 109.50                      |
| 23.93                           | N/A                             | 23.93                       |
| 12.20                           | 15.32                           | 13.76                       |
| 12.32                           | 9.91                            | 11.12                       |
| N/A                             | 12.51                           | 12.51                       |
| >200                            | >200                            | >200                        |
| 16.47                           | 16.37                           | 16.42                       |
| 25.28                           | N/A                             | 25.28                       |
| 55.72                           | 51.73                           | 53.72                       |
| N/A                             | 23.66                           | 23.66                       |
| 47.00                           | 35.77                           | 41.39                       |
| 32.61                           | N/A                             | 32.61                       |

|        |        |        |
|--------|--------|--------|
| >200   | N/A    | >200   |
| 19.51  | 17.00  | 18.26  |
| 28.67  | 29.24  | 28.95  |
| N/A    | 19.88  | 19.88  |
| N/A    | 5.91   | 5.91   |
| 4.97   | 4.33   | 4.65   |
| 5.05   | 5.23   | 5.14   |
| 5.36   | 5.92   | 5.64   |
| N/A    | 9.53   | 9.53   |
| 16.32  | 7.97   | 12.14  |
| 25.61  | 18.24  | 21.93  |
| N/A    | 17.23  | 17.23  |
| 14.46  | 14.90  | 14.68  |
| 13.70  | 13.87  | 13.79  |
| >200   | >200   | >200   |
| >200   | >200   | >200   |
| >200   | >200   | >200   |
| 19.58  | N/A    | 19.58  |
| 23.52  | 18.50  | 21.01  |
| N/A    | 11.00  | 11.00  |
| 17.80  | 19.59  | 18.70  |
| N/A    | 40.90  | 40.90  |
| 20.40  | 24.46  | 22.43  |
| 16.85  | 13.95  | 15.40  |
| 20.83  | 27.76  | 24.30  |
| 74.77  | 61.03  | 67.90  |
| 134.97 | N/A    | 134.97 |
| 16.05  | 23.14  | 19.60  |
| N/A    | >200   | >200   |
| 14.70  | 12.70  | 13.70  |
| 17.94  | 17.72  | 17.83  |
| N/A    | 109.00 | 109.00 |
| >200   | >200   | >200   |
| 18.02  | 20.44  | 19.23  |
| N/A    | 22.65  | 22.65  |
| 10.19  | 12.22  | 11.21  |
| 15.48  | 10.62  | 13.05  |
| 21.09  | 27.08  | 24.09  |
| N/A    | 14.20  | 14.20  |
| >200   | N/A    | >200   |
| 11.90  | N/A    | 11.90  |
| N/A    | >200   | >200   |
| 9.94   | N/A    | 9.94   |

|       |       |       |
|-------|-------|-------|
| 12.97 | 16.28 | 14.63 |
| 15.47 | 18.62 | 17.04 |
| >200  | >200  | >200  |
| 25.17 | 25.52 | 25.35 |
| 22.71 | 23.37 | 23.04 |
| 35.24 | 24.58 | 29.91 |
| 94.42 | 90.72 | 92.57 |
| N/A   | 45.48 | 45.48 |
| 20.01 | 15.40 | 17.71 |
| 19.70 | 22.42 | 21.06 |
| 85.28 | 51.83 | 68.56 |
| 16.37 | 30.27 | 23.32 |
| 11.02 | 16.59 | 13.80 |
| 6.23  | 5.90  | 6.06  |
| 7.18  | 5.55  | 6.37  |
| 5.57  | N/A   | 5.57  |
| 13.54 | 11.79 | 12.66 |
| N/A   | 9.72  | 9.72  |
| 4.88  | 5.85  | 5.37  |
| 8.01  | N/A   | 8.01  |
| N/A   | 9.04  | 9.04  |
| 3.84  | 3.56  | 3.70  |
| 15.74 | 14.86 | 15.30 |
| >200  | >200  | >200  |
| >200  | >200  | >200  |
| 28.19 | 34.41 | 31.30 |
| N/A   | 20.16 | 20.16 |
| 5.47  | N/A   | 5.47  |
| 14.86 | 13.40 | 14.13 |
| >200  | >200  | >200  |
| >200  | >200  | >200  |
| N/A   | >200  | >200  |
| >200  | >200  | >200  |
| N/A   | >200  | >200  |
| 22.12 | 18.91 | 20.52 |
| >200  | >200  | >200  |
| N/A   | 15.28 | 15.28 |
| 58.65 | N/A   | 58.65 |
| 3.75  | 3.35  | 3.55  |
| 11.29 | N/A   | 11.29 |
| 19.90 | 21.76 | 20.83 |
| 22.87 | N/A   | 22.87 |
| 9.93  | 12.51 | 11.22 |

|       |       |       |
|-------|-------|-------|
| 3.83  | N/A   | 3.83  |
| 17.06 | 10.00 | 13.53 |
| 27.93 | N/A   | 27.93 |
| 21.11 | 18.43 | 19.77 |
| 43.93 | N/A   | 43.93 |
| N/A   | 28.37 | 28.37 |
| 9.93  | N/A   | 9.93  |
| 21.71 | 15.96 | 18.83 |
| >200  | >200  | >200  |
| 66.23 | 57.97 | 62.10 |
| 28.43 | N/A   | 28.43 |
| 23.76 | 21.86 | 22.81 |
| 7.08  | 7.27  | 7.18  |
| 4.26  | 4.49  | 4.37  |
| N/A   | 61.73 | 61.73 |
| 2.97  | 3.02  | 2.99  |
| 25.21 | 20.08 | 22.64 |
| 47.00 | 48.31 | 47.65 |
| 16.88 | 17.59 | 17.23 |
| >200  | N/A   | >200  |
| N/A   | >200  | >200  |
| 45.16 | 32.61 | 38.88 |
| N/A   | 73.02 | 73.02 |
| 36.06 | 41.69 | 38.87 |
| 81.11 | 84.31 | 82.71 |
| N/A   | 17.09 | 17.09 |
| 27.53 | 27.48 | 27.51 |
| 6.99  | 7.12  | 7.05  |
| >200  | N/A   | >200  |
| 20.83 | 19.04 | 19.93 |
| 11.61 | 7.42  | 9.52  |
| 22.91 | 14.73 | 18.82 |
| 14.43 | 11.28 | 12.85 |
| >200  | >200  | >200  |
| 10.46 | 12.31 | 11.38 |
| 11.29 | 15.57 | 13.43 |
| 13.28 | 18.18 | 15.73 |
| 28.39 | 32.71 | 30.55 |
| N/A   | >200  | >200  |
| 13.95 | 12.42 | 13.18 |
| 17.70 | 13.43 | 15.56 |
| >200  | N/A   | >200  |
| 15.88 | 21.83 | 18.86 |

|        |        |        |
|--------|--------|--------|
| 7.16   | 7.66   | 7.41   |
| 16.24  | 23.77  | 20.00  |
| 35.79  | 29.61  | 32.70  |
| N/A    | 17.20  | 17.20  |
| 13.92  | N/A    | 13.92  |
| N/A    | 17.26  | 17.26  |
| 11.50  | 12.62  | 12.06  |
| N/A    | 7.67   | 7.67   |
| N/A    | 107.97 | 107.97 |
| 22.32  | N/A    | 22.32  |
| 10.66  | 9.91   | 10.29  |
| 17.10  | 17.86  | 17.48  |
| 8.42   | 6.66   | 7.54   |
| 56.57  | 48.00  | 52.29  |
| >200   | >200   | >200   |
| 6.49   | 5.50   | 6.00   |
| 10.41  | 10.82  | 10.61  |
| 15.51  | 16.31  | 15.91  |
| 110.81 | 107.61 | 109.21 |
| 13.13  | 17.19  | 15.16  |
| N/A    | >200   | >200   |
| 7.32   | N/A    | 7.32   |
| 6.65   | N/A    | 6.65   |
| 8.40   | N/A    | 8.40   |
| N/A    | 13.72  | 13.72  |
| N/A    | 5.59   | 5.59   |
| 7.53   | N/A    | 7.53   |
| 30.68  | 19.94  | 25.31  |
| >200   | >200   | >200   |
| N/A    | 62.41  | 62.41  |
| >200   | >200   | >200   |
| 15.54  | 13.78  | 14.66  |
| N/A    | 23.57  | 23.57  |
| 16.55  | 17.75  | 17.15  |
| 32.02  | N/A    | 32.02  |
| 13.27  | N/A    | 13.27  |
| 25.70  | 24.33  | 25.02  |
| >200   | N/A    | >200   |
| 8.71   | 7.49   | 8.10   |
| N/A    | 30.30  | 30.30  |
| N/A    | 6.38   | 6.38   |
| 5.03   | 4.97   | 5.00   |
| 19.84  | 16.06  | 17.95  |

|        |        |        |
|--------|--------|--------|
| N/A    | >200   | >200   |
| N/A    | 17.63  | 17.63  |
| 10.04  | N/A    | 10.04  |
| N/A    | 27.53  | 27.53  |
| N/A    | 17.89  | 17.89  |
| 16.10  | 15.91  | 16.01  |
| 12.55  | 8.91   | 10.73  |
| 7.64   | 6.76   | 7.20   |
| 45.77  | 40.29  | 43.03  |
| 16.61  | 11.41  | 14.01  |
| 18.31  | 12.47  | 15.39  |
| 13.08  | 22.78  | 17.93  |
| 12.96  | N/A    | 12.96  |
| 83.78  | 105.22 | 94.50  |
| 104.52 | 108.28 | 106.40 |
| 11.40  | 10.04  | 10.72  |
| N/A    | 29.18  | 29.18  |
| 58.77  | 77.68  | 68.22  |
| 19.84  | 20.86  | 20.35  |
| N/A    | 42.04  | 42.04  |
| N/A    | 3.80   | 3.80   |
| 12.36  | 9.70   | 11.03  |
| 12.31  | 10.47  | 11.39  |
| 37.04  | 23.13  | 30.08  |
| >200   | >200   | >200   |
| >200   | >200   | >200   |
| 12.48  | 15.41  | 13.94  |
| >200   | >200   | >200   |
| 22.49  | 19.83  | 21.16  |
| N/A    | 11.04  | 11.04  |
| 51.80  | N/A    | 51.80  |
| 6.61   | 6.71   | 6.66   |
| 19.14  | 15.18  | 17.16  |
| 21.40  | 17.25  | 19.32  |
| 7.30   | N/A    | 7.30   |
| 54.41  | 63.40  | 58.90  |
| N/A    | >200   | >200   |
| 6.85   | N/A    | 6.85   |
| 11.91  | 19.64  | 15.77  |
| 57.49  | 30.83  | 44.16  |
| >200   | >200   | >200   |
| 10.74  | 14.89  | 12.82  |
| N/A    | 51.64  | 51.64  |

|        |        |        |
|--------|--------|--------|
| 39.07  | N/A    | 39.07  |
| >200   | N/A    | >200   |
| N/A    | 19.35  | 19.35  |
| 22.65  | 12.75  | 17.70  |
| >200   | >200   | >200   |
| 22.36  | 14.82  | 18.59  |
| 19.87  | 15.40  | 17.63  |
| 29.81  | 21.65  | 25.73  |
| N/A    | 27.74  | 27.74  |
| 41.97  | N/A    | 41.97  |
| 55.49  | 58.53  | 57.01  |
| 5.60   | N/A    | 5.60   |
| 13.84  | 16.12  | 14.98  |
| 14.86  | 21.31  | 18.09  |
| 18.59  | 17.61  | 18.10  |
| 26.63  | 41.31  | 33.97  |
| N/A    | 10.27  | 10.27  |
| 18.19  | 20.07  | 19.13  |
| >200   | >200   | >200   |
| 12.06  | 13.72  | 12.89  |
| 30.34  | 31.05  | 30.69  |
| 38.62  | 26.05  | 32.34  |
| 16.43  | N/A    | 16.43  |
| 9.14   | 9.83   | 9.49   |
| 8.03   | 9.83   | 8.93   |
| 7.42   | 8.33   | 7.88   |
| 8.64   | 8.93   | 8.79   |
| 14.20  | N/A    | 14.20  |
| 25.50  | 13.65  | 19.58  |
| 23.83  | 11.89  | 17.86  |
| 10.55  | N/A    | 10.55  |
| >200   | N/A    | >200   |
| 127.09 | 104.44 | 115.77 |
| 15.63  | 15.53  | 15.58  |
| N/A    | 8.54   | 8.54   |
| 5.76   | 4.91   | 5.33   |
| 18.72  | 13.47  | 16.09  |
| 17.92  | 23.39  | 20.66  |
| 14.68  | N/A    | 14.68  |
| N/A    | 152.98 | 152.98 |
| >200   | N/A    | >200   |
| 8.96   | 11.42  | 10.19  |
| >200   | >200   | >200   |

|        |        |        |
|--------|--------|--------|
| N/A    | 8.72   | 8.72   |
| 25.79  | 23.78  | 24.78  |
| 12.49  | 9.30   | 10.90  |
| N/A    | >200   | >200   |
| 18.43  | 12.79  | 15.61  |
| 54.28  | 60.27  | 57.27  |
| 38.97  | 30.51  | 34.74  |
| 33.47  | 30.18  | 31.83  |
| 61.08  | 58.48  | 59.78  |
| 108.78 | 109.71 | 109.25 |
| 26.92  | 22.01  | 24.47  |
| 28.36  | 36.87  | 32.61  |
| 21.65  | 22.96  | 22.30  |
| 15.33  | 20.04  | 17.68  |
| 21.64  | N/A    | 21.64  |
| 9.71   | 8.24   | 8.97   |
| 32.03  | 29.05  | 30.54  |
| >200   | >200   | >200   |
| 37.88  | 24.60  | 31.24  |
| 27.56  | N/A    | 27.56  |
| >200   | >200   | >200   |
| 25.11  | 13.86  | 19.49  |
| 7.50   | 7.51   | 7.51   |
| 37.56  | 28.87  | 33.22  |
| N/A    | >200   | >200   |
| N/A    | 76.67  | 76.67  |
| 10.54  | N/A    | 10.54  |
| 36.89  | N/A    | 36.89  |
| 11.02  | 15.39  | 13.21  |
| 11.44  | 10.98  | 11.21  |
| 16.73  | N/A    | 16.73  |
| 34.72  | 18.33  | 26.52  |
| N/A    | >200   | >200   |
| 17.73  | 15.52  | 16.63  |
| N/A    | 71.29  | 71.29  |
| N/A    | 17.81  | 17.81  |
| N/A    | 13.74  | 13.74  |
| 11.28  | 12.36  | 11.82  |
| N/A    | >200   | >200   |
| 23.49  | 31.04  | 27.27  |
| 9.55   | N/A    | 9.55   |
| 6.54   | 6.83   | 6.69   |
| N/A    | 16.82  | 16.82  |

|        |        |        |
|--------|--------|--------|
| 46.98  | 54.83  | 50.90  |
| 5.19   | 5.13   | 5.16   |
| 9.17   | 9.09   | 9.13   |
| 10.06  | 9.12   | 9.59   |
| 11.16  | 14.24  | 12.70  |
| 13.93  | 14.79  | 14.36  |
| 19.13  | N/A    | 19.13  |
| N/A    | 13.11  | 13.11  |
| 7.21   | 8.20   | 7.70   |
| 16.38  | 20.32  | 18.35  |
| N/A    | 105.95 | 105.95 |
| 12.68  | 7.65   | 10.16  |
| 15.55  | 8.65   | 12.10  |
| N/A    | 9.41   | 9.41   |
| 10.55  | 7.71   | 9.13   |
| >200   | 165.19 | 182.60 |
| 29.95  | N/A    | 29.95  |
| N/A    | 19.38  | 19.38  |
| 21.68  | N/A    | 21.68  |
| 130.82 | N/A    | 130.82 |
| 20.88  | 15.34  | 18.11  |
| 7.86   | 9.06   | 8.46   |
| 11.51  | 10.04  | 10.78  |
| 8.09   | N/A    | 8.09   |
| 8.63   | 7.12   | 7.88   |
| 52.95  | 57.82  | 55.39  |
| >200   | N/A    | >200   |
| 18.68  | 7.18   | 12.93  |
| 11.80  | 9.55   | 10.67  |
| 29.86  | 29.49  | 29.67  |
| 18.89  | 22.72  | 20.81  |
| 21.51  | 34.56  | 28.03  |
| N/A    | 12.87  | 12.87  |
| 21.21  | 14.79  | 18.00  |
| >200   | 159.05 | 179.53 |
| 22.33  | N/A    | 22.33  |
| >200   | >200   | >200   |
| N/A    | >200   | >200   |
| 9.36   | N/A    | 9.36   |
| 9.68   | 9.81   | 9.74   |
| 18.19  | 17.79  | 17.99  |
| 20.03  | 18.39  | 19.21  |
| N/A    | 3.60   | 3.60   |

22.52  
30.61

21.80  
19.30

22.16  
24.95

| <b>Standard Deviation</b> | <b>PPM</b> | <b>XCorr</b> | <b>Domain Name</b>     |
|---------------------------|------------|--------------|------------------------|
| N/A                       | -5.46      | 1.685        |                        |
| N/A                       | 2.24       | 4.228        |                        |
| N/A                       | -0.48      | 3.091        | Fibronectin type-III   |
| N/A                       | 2.09       | 2.133        |                        |
| 0.75                      | 0.66       | 3.521        | Peptidase M12B         |
| 0.83                      | 1.14       | 2.784        | CUB 2                  |
| 0.33                      | 0.76       | 3.196        | F5/8 type C2           |
| 2.09                      | -0.1       | 2.429        | Sema                   |
| 0.37                      | -0.17      | 2.105        |                        |
| 1.32                      | -1.12      | 5.692        |                        |
| N/A                       | -0.89      | 2.461        | IPT/TIG 1              |
| 1.48                      | 2.04       | 4.091        | IPT/TIG 3              |
| 0.37                      | 5.01       | 3.098        |                        |
| N/A                       | 0.97       | 3.856        |                        |
| 4.51                      | 2.33       | 3.989        | Laminin G-like 2       |
| N/A                       | 4.03       | 1.952        | SRCR                   |
| N/A                       | -0.54      | 4.045        | Ig-like C2-type 3      |
| N/A                       | -1.05      | 2.86         | Ig-like C2-type 5      |
| 21.94                     | 4.97       | 5.084        | Fibronectin type-III 1 |
| 4.65                      | 1.88       | 1.828        | IPT/TIG 3              |
| N/A                       | -0.26      | 1.934        |                        |
| N/A                       | 1.16       | 2.566        |                        |
| 1.17                      | -0.15      | 4.38         | Ig-like V-type         |
| N/A                       | 4.33       | 2.972        |                        |
| 0.14                      | -0.81      | 2.461        |                        |
| N/A                       | -0.06      | 2.238        |                        |
| 1.20                      | -1.2       | 3.09         |                        |
| N/A                       | 4.03       | 3.094        | Ig-like C2-type 1      |
| N/A                       | -0.53      | 2.341        | Ig-like C2-type 5      |
| N/A                       | -1.11      | 6.579        | Ig-like C2-type 6      |
| 2.21                      | 2.53       | 1.919        | Ig-like C2-type 7      |
| 1.70                      | 0.21       | 3.477        | Ig-like C2-type 7      |
| N/A                       | -0.11      | 2.19         | Ig-like C2-type 6      |
| N/A                       | 4.39       | 3.87         | Ig-like V-type         |
| 0.07                      | 3.41       | 2.412        | Ig-like V-type         |
| N/A                       | -1.3       | 1.991        | Laminin EGF-like 1     |
| 2.82                      | -2.24      | 2.131        | Laminin EGF-like 1     |
| N/A                       | -0.21      | 2.189        |                        |
| 7.94                      | 0.01       | 4.61         |                        |
| N/A                       | 2.93       | 4.507        |                        |

|      |       |       |                        |
|------|-------|-------|------------------------|
| N/A  | -1.78 | 2.845 |                        |
| 1.77 | -0.97 | 1.9   |                        |
| 0.40 | -2    | 3.323 |                        |
| N/A  | -0.3  | 2.145 |                        |
| N/A  | -0.37 | 2.029 | UPAR/Ly6 1             |
| 0.45 | -0.18 | 3.164 | UPAR/Ly6 2             |
| 0.13 | 0.37  | 2.187 |                        |
| 0.40 | 3.3   | 3.682 | Ig-like V-type         |
| N/A  | -0.1  | 3.365 |                        |
| 5.90 | 0.99  | 3.541 |                        |
| 5.21 | -0.33 | 3.782 |                        |
| N/A  | 1.09  | 1.579 | PA                     |
| 0.31 | 1.25  | 5.659 |                        |
| 0.12 | 6.35  | 2.63  |                        |
| N/A  | 0.87  | 2.754 |                        |
| N/A  | 0.87  | 2.563 |                        |
| N/A  | -0.07 | 5.521 |                        |
| N/A  | -0.12 | 6.447 |                        |
| 3.55 | 0.39  | 3.694 |                        |
| N/A  | -1.81 | 1.941 |                        |
| 1.27 | 0.95  | 2.677 | Ig-like C2-type 2      |
| N/A  | 4.86  | 3.526 | Ig-like C2-type 3      |
| 2.87 | 0.64  | 5.07  | VWFA                   |
| 2.05 | -0.07 | 4.846 |                        |
| 4.90 | -0.44 | 2.258 |                        |
| 9.72 | 8.68  | 4.45  |                        |
| N/A  | 4.71  | 4.761 |                        |
| 5.01 | 7.37  | 3.279 | Fibronectin type-III 3 |
| N/A  | -0.56 | 2.229 |                        |
| 1.41 | -0.84 | 3.657 | Ig-like 1              |
| 0.16 | 0.34  | 4.171 | Ig-like 2              |
| N/A  | 6.66  | 5.042 | Ig-like 3              |
| N/A  | -0.45 | 3.451 | Ig-like 4              |
| 1.71 | 7.27  | 7.008 | Ig-like 6              |
| N/A  | -0.65 | 2.48  | Ig-like 7              |
| 1.44 | 0.39  | 2.69  |                        |
| 3.44 | -0.26 | 1.986 |                        |
| 4.24 | -0.53 | 2.844 |                        |
| N/A  | -0.09 | 6.303 |                        |
| N/A  | -7.28 | 3.467 | Peptidase A1           |
| N/A  | -1.57 | 2.393 | Saposin B-type 1       |
| N/A  | -0.34 | 7.519 |                        |
| N/A  | 4.74  | 2.325 | Fibronectin type-III 3 |

|       |       |       |                        |
|-------|-------|-------|------------------------|
| 2.34  | 0.07  | 2.978 | Fibronectin type-III 4 |
| 2.23  | 5.67  | 2.218 | Fibronectin type-III 4 |
| N/A   | 1.58  | 3.989 | Sushi 1                |
| 0.25  | 0.72  | 2.667 |                        |
| 0.47  | -0.58 | 6.423 |                        |
| 7.54  | -0.16 | 3.58  |                        |
| 2.62  | 1.15  | 2.095 |                        |
| N/A   | 1.5   | 3.705 |                        |
| 3.26  | 1.74  | 3.964 |                        |
| 1.92  | 3.55  | 3.183 |                        |
| 23.65 | -7.51 | 3.319 |                        |
| 9.83  | 0.02  | 2.909 | Thyroglobulin type-1   |
| 3.94  | -0.07 | 2.56  |                        |
| 0.23  | 0.09  | 2.805 |                        |
| 1.15  | 3.21  | 3.248 | Fibronectin type-III 7 |
| N/A   | -0.98 | 1.687 |                        |
| 1.24  | -0.41 | 2.335 |                        |
| N/A   | -1.05 | 2.972 | Laminin EGF-like 11    |
| 0.69  | -0.25 | 3.101 |                        |
| N/A   | -0.1  | 2.963 |                        |
| N/A   | 0.22  | 3.782 |                        |
| 0.20  | 0.3   | 2.56  |                        |
| 0.62  | -1.76 | 3.698 |                        |
| N/A   | 4.24  | 3.122 |                        |
| N/A   | 6.17  | 4.122 |                        |
| 4.40  | -0.36 | 2.096 |                        |
| N/A   | -0.76 | 5.366 |                        |
| N/A   | -0.05 | 1.53  | Ig-like C2-type 3      |
| 1.03  | -1.19 | 1.675 |                        |
| N/A   | -2.07 | 6.046 |                        |
| N/A   | -7.84 | 2.8   |                        |
| N/A   | -1.58 | 2.248 |                        |
| N/A   | -0.54 | 2.116 |                        |
| N/A   | -0.51 | 3.498 |                        |
| 2.27  | -0.04 | 2.856 |                        |
| N/A   | -0.26 | 2.193 |                        |
| N/A   | -0.22 | 1.708 | UPAR/Ly6               |
| N/A   | 2.42  | 2.456 | Ig-like V-type         |
| 0.28  | 4.66  | 2.612 |                        |
| N/A   | 6.9   | 2.535 | Link                   |
| 1.32  | 7.35  | 3.042 |                        |
| N/A   | -0.01 | 2.116 | Thyroglobulin type-1   |
| 1.82  | 1.09  | 2.588 | Thyroglobulin type-1   |

|      |       |       |                        |
|------|-------|-------|------------------------|
| N/A  | -0.21 | 2.264 | Fibronectin type-III 1 |
| 4.99 | 0.01  | 2.412 | Fibronectin type-III 2 |
| N/A  | -2.28 | 2.647 |                        |
| 1.90 | 7.46  | 3.52  | VWFA                   |
| N/A  | -1.54 | 2.497 |                        |
| N/A  | 0.48  | 1.877 |                        |
| N/A  | -0.61 | 1.73  |                        |
| 4.07 | -0.06 | 4     |                        |
| N/A  | 4.6   | 3.507 |                        |
| 5.84 | -8.67 | 4.574 |                        |
| N/A  | -0.69 | 1.815 |                        |
| 1.34 | -0.32 | 2.072 |                        |
| 0.13 | -0.69 | 4.152 |                        |
| 0.16 | 0.31  | 2.035 |                        |
| N/A  | -0.55 | 4.689 |                        |
| 0.04 | 3.48  | 3.474 | Cadherin 5             |
| 3.63 | 5.66  | 3.149 |                        |
| 0.93 | 3.1   | 3.054 |                        |
| 0.50 | 9.54  | 4.137 |                        |
| N/A  | 3.98  | 2.426 |                        |
| N/A  | -1.03 | 2.958 |                        |
| 8.87 | 0.7   | 4.539 |                        |
| N/A  | -0.75 | 2.163 |                        |
| 3.98 | 0.17  | 3.919 |                        |
| 2.26 | -1.89 | 4.517 |                        |
| N/A  | -0.28 | 2.644 |                        |
| 0.04 | -0.07 | 2.925 |                        |
| 0.09 | -0.37 | 2.167 |                        |
| N/A  | -0.68 | 2.143 |                        |
| 1.27 | 0.47  | 3.095 | Fibronectin type-III 2 |
| 2.96 | -0.14 | 4.056 |                        |
| 5.78 | 0.36  | 3.668 |                        |
| 2.23 | 9.7   | 2.979 |                        |
| N/A  | 0.15  | 2.381 |                        |
| 1.31 | -0.12 | 1.585 | Ig-like C2-type 3      |
| 3.03 | 2.8   | 2.333 | Fibronectin type-III 1 |
| 3.46 | 1.3   | 3.412 | Fibronectin type-III 3 |
| 3.05 | 5.22  | 4.966 |                        |
| N/A  | -0.88 | 4.628 | Ig-like C2-type        |
| 1.08 | -0.32 | 2.171 | Ig-like V-type         |
| 3.02 | -0.34 | 2.442 | Ig-like V-type         |
| N/A  | -7.83 | 1.642 |                        |
| 4.21 | 3.47  | 2.142 | Ig-like C2-type        |

|      |       |       |                         |
|------|-------|-------|-------------------------|
| 0.35 | -3.76 | 2.57  | Fibronectin type-III 1  |
| 5.32 | 8.61  | 5.33  |                         |
| 4.37 | 8.35  | 2.74  |                         |
| N/A  | -1.71 | 2.138 |                         |
| N/A  | -2.84 | 3.125 |                         |
| N/A  | -0.96 | 1.801 |                         |
| 0.79 | 3.61  | 3.602 |                         |
| N/A  | -0.5  | 2.522 |                         |
| N/A  | -0.44 | 5.96  |                         |
| N/A  | -8.25 | 4.643 | EGF-like 2 calcium-bind |
| 0.53 | 0.1   | 3.164 |                         |
| 0.54 | -0.55 | 2.543 |                         |
| 1.24 | -1.17 | 2.882 | Ig-like C2-type 2       |
| 6.06 | 0.37  | 3.035 |                         |
| N/A  | 2.96  | 4.017 | Sema                    |
| 0.70 | -4.29 | 2.773 |                         |
| 0.29 | -0.83 | 2.494 | Ephrin RBD              |
| 0.57 | 1.51  | 2.687 | PSI                     |
| 2.26 | -3.07 | 5.567 |                         |
| 2.87 | 2.14  | 4.868 |                         |
| N/A  | -0.3  | 4.117 |                         |
| N/A  | 3.48  | 5.783 |                         |
| N/A  | -1.05 | 2.992 |                         |
| N/A  | -0.31 | 4.375 |                         |
| N/A  | 4.88  | 3.425 |                         |
| N/A  | -0.69 | 2.927 | DSL                     |
| N/A  | -0.51 | 2.915 |                         |
| 7.59 | 8     | 2.096 | Peptidase M12B          |
| N/A  | -0.89 | 2.631 | Disintegrin             |
| N/A  | -1.57 | 1.901 | Fibronectin type-III 2  |
| N/A  | -0.18 | 2.385 | SEA                     |
| 1.24 | -0.8  | 2.656 | Cadherin 3              |
| N/A  | -0.97 | 2.678 | Cadherin 5              |
| 0.85 | -0.62 | 2.034 | UPAR/Ly6 2              |
| N/A  | 3.06  | 4.005 | EGF-like 1              |
| N/A  | -0.56 | 2.946 |                         |
| 0.97 | -0.28 | 2.303 |                         |
| N/A  | -0.47 | 1.829 | LDL-receptor class A 21 |
| 0.86 | -1.03 | 3.335 | EGF-like 21             |
| N/A  | 0.88  | 2.389 | Cadherin 3              |
| N/A  | 0.15  | 3.536 | Fibronectin type-III 1  |
| 0.04 | -0.3  | 1.656 | Fibronectin type-III 2  |
| 2.67 | 0.1   | 5.377 | Ig-like V-type          |

|       |       |       |                        |
|-------|-------|-------|------------------------|
| N/A   | -0.08 | 5.145 | Ig-like V-type         |
| N/A   | 0.11  | 3.683 | Fibronectin type-III 5 |
| N/A   | -9.83 | 2.452 | Ig-like C2-type 1      |
| N/A   | -4.77 | 3.108 | Ig-like C2-type 3      |
| N/A   | -0.63 | 4.174 | Ig-like C2-type 4      |
| 0.13  | -0.91 | 2.837 | Fibronectin type-III 5 |
| 2.57  | 3.09  | 5.437 |                        |
| 0.62  | -2.31 | 3.049 |                        |
| 3.87  | 6.22  | 3.18  | Peptidase M12B         |
| 3.68  | -0.27 | 4.5   | LRRNT                  |
| 4.13  | 0.19  | 5.172 |                        |
| 6.86  | -0.17 | 3.887 |                        |
| N/A   | -0.09 | 4.615 | Ig-like V-type 1       |
| 15.16 | 0.12  | 2.055 | Ig-like V-type 2       |
| 2.66  | 2.7   | 3.374 | Ig-like C2-type 1      |
| 0.96  | 0.19  | 2.233 | Ig-like C2-type 1      |
| N/A   | 2.11  | 1.867 | Ig-like C2-type 2      |
| 13.37 | -0.04 | 5.09  | Ig-like C2-type 3      |
| 0.72  | -8.7  | 3.44  | Ig-like C2-type 3      |
| N/A   | 2.16  | 2.763 |                        |
| N/A   | 0.12  | 5.433 | Cadherin 1             |
| 1.88  | -0.23 | 2.946 | Cadherin 2             |
| 1.30  | -0.3  | 3.929 | Cadherin 4             |
| 9.84  | 1.3   | 2.375 |                        |
| N/A   | -1.04 | 4.386 | PKD                    |
| N/A   | -0.48 | 4.271 |                        |
| 2.07  | -0.29 | 2.354 | Ig-like V-type         |
| N/A   | -0.14 | 2.683 | Ig-like C2-type 1      |
| 1.88  | -0.73 | 2.729 | Ig-like C2-type 2      |
| N/A   | 2.66  | 4.812 | Fibronectin type-III 2 |
| N/A   | 4.15  | 4.717 | Fibronectin type-III 2 |
| 0.07  | 1.12  | 2.373 |                        |
| 2.80  | 2.82  | 3.082 |                        |
| 2.93  | -0.59 | 3.626 |                        |
| N/A   | -0.71 | 2.048 |                        |
| 6.36  | 3     | 4.337 |                        |
| N/A   | -0.2  | 1.987 | MARVEL                 |
| N/A   | -3.88 | 2.899 | Ig-like C2-type        |
| 5.47  | 0.46  | 6.357 |                        |
| 18.85 | -2.09 | 3.028 |                        |
| N/A   | 1.76  | 2.716 | Ig-like C1-type        |
| 2.93  | -0.59 | 3.427 | Ig-like C2-type        |
| N/A   | -3.98 | 4.302 |                        |

|       |       |       |                         |
|-------|-------|-------|-------------------------|
| N/A   | 4.44  | 5.167 |                         |
| N/A   | -0.77 | 3.865 |                         |
| N/A   | -0.46 | 3.955 |                         |
| 7.00  | 5.96  | 2.938 |                         |
| N/A   | -0.19 | 1.937 |                         |
| 5.33  | -0.65 | 3.465 |                         |
| 3.16  | -5.46 | 2.439 |                         |
| 5.77  | 0.35  | 2.446 | Ig-like C2-type 6       |
| N/A   | -0.31 | 3.067 | Fibronectin type-III 4  |
| N/A   | -0.44 | 1.94  |                         |
| 2.15  | -0.61 | 2.653 |                         |
| N/A   | 6.64  | 1.987 | Calx-beta 4             |
| 1.61  | -0.08 | 2.481 | VWFA                    |
| 4.56  | 3.78  | 4.905 | Ig-like V-type 1        |
| 0.69  | -1.17 | 3.712 | Ig-like V-type 1        |
| 10.38 | 1.72  | 3.252 | Ig-like C2-type 1       |
| N/A   | 0.39  | 3.33  | Ig-like V-type 2        |
| 1.33  | -0.33 | 2.686 |                         |
| N/A   | 3.9   | 3.23  |                         |
| 1.17  | -0.17 | 5.874 |                         |
| 0.50  | -1.24 | 5.844 |                         |
| 8.89  | 0.36  | 3.484 |                         |
| N/A   | -1.02 | 4.846 |                         |
| 0.49  | 0.32  | 1.725 |                         |
| 1.27  | 0.36  | 3.255 |                         |
| 0.64  | 5.3   | 2.83  |                         |
| 0.21  | 0.22  | 1.988 | TSP type-1 2            |
| N/A   | -7.52 | 2.082 |                         |
| 8.38  | -1.72 | 1.93  | Fibronectin type-III 11 |
| 8.44  | 9.36  | 2.48  | CUB                     |
| N/A   | 8.14  | 3.828 |                         |
| N/A   | -1.39 | 4.373 |                         |
| 16.02 | -0.39 | 5.22  |                         |
| 0.07  | -0.13 | 2.044 |                         |
| N/A   | 1.09  | 2.375 |                         |
| 0.60  | -0.35 | 3.039 |                         |
| 3.71  | -0.21 | 3.176 | Ig-like C2-type 4       |
| 3.87  | 4.18  | 3.001 |                         |
| N/A   | 0.34  | 2.026 | Ig-like C2-type 2       |
| N/A   | 0.38  | 2.943 | Ig-like C2-type 6       |
| N/A   | -5.46 | 3.921 | Ig-like C2-type 12      |
| 1.74  | 7.68  | 3.408 | CUB                     |
| N/A   | 0.02  | 3.69  | PA                      |

|       |       |       |                        |
|-------|-------|-------|------------------------|
| N/A   | -0.74 | 6.502 |                        |
| 1.42  | 5.58  | 3.834 | Ig-like V-type         |
| 2.26  | 0.23  | 1.735 | Cadherin 5             |
| N/A   | 0.14  | 3.588 |                        |
| 3.99  | -0.65 | 2.717 |                        |
| 4.24  | -1.21 | 1.693 | SEA 3                  |
| 5.98  | 8.46  | 3.79  |                        |
| 2.33  | -0.14 | 2.714 |                        |
| 1.84  | 0.06  | 4.161 |                        |
| 0.66  | -0.7  | 4.982 |                        |
| 3.47  | 1.09  | 5.311 |                        |
| 6.02  | -0.58 | 2.626 | Ig-like 2              |
| 0.93  | 0.96  | 4.873 | Ig-like 3              |
| 3.33  | 0.3   | 4.39  | Fibronectin type-III 3 |
| N/A   | -2.53 | 2.794 | Fibronectin type-III 4 |
| 1.04  | 4.88  | 1.967 | Sema                   |
| 2.11  | 2.9   | 3.621 |                        |
| N/A   | 2.09  | 2.104 |                        |
| 9.39  | -0.66 | 4.023 |                        |
| N/A   | -0.15 | 1.583 | Ig-like C2-type 2      |
| N/A   | 4.28  | 2.757 |                        |
| 7.95  | 3.2   | 3.627 |                        |
| 0.01  | 0.92  | 4.376 |                        |
| 6.14  | -0.48 | 2.328 |                        |
| N/A   | -3.5  | 3.531 |                        |
| N/A   | -0.61 | 1.936 | Ig-like                |
| N/A   | -1.41 | 4.664 | Ig-like V-type         |
| N/A   | 5.67  | 4.015 | Ig-like V-type         |
| 3.09  | 3.55  | 4.095 | Sema                   |
| 0.33  | 1.56  | 3.247 | Sema                   |
| N/A   | -0.28 | 3.546 | PSI                    |
| 11.59 | 6.45  | 6.879 | Thioredoxin            |
| N/A   | -0.01 | 3.344 |                        |
| 1.56  | 5.56  | 5.613 |                        |
| N/A   | -0.99 | 2.338 |                        |
| N/A   | -0.06 | 3.037 | VWFA                   |
| N/A   | -0.45 | 3.844 |                        |
| 0.76  | 1.97  | 3.632 | Cadherin 4             |
| N/A   | -0.97 | 4.103 |                        |
| 5.34  | 0.3   | 2.113 |                        |
| N/A   | 0.53  | 9.089 | Cadherin 9             |
| 0.21  | 2.56  | 4.733 | Cadherin 9             |
| N/A   | 1.56  | 5.777 | Laminin G-like 1       |

|      |       |       |                        |
|------|-------|-------|------------------------|
| 5.55 | -1.13 | 5.644 | Laminin G-like 2       |
| 0.04 | -0.6  | 2.562 | EGF-like 7             |
| 0.06 | -0.17 | 3.331 |                        |
| 0.66 | 7.59  | 2.778 |                        |
| 2.18 | -0.01 | 2.477 |                        |
| 0.61 | -0.83 | 2.247 | Ig-like C2-type 1      |
| N/A  | -0.09 | 3.631 | Sema                   |
| N/A  | -3.07 | 1.824 |                        |
| 0.70 | 2.14  | 4.152 | Laminin G-like 1       |
| 2.79 | -0.5  | 3.746 |                        |
| N/A  | -0.45 | 2.353 |                        |
| 3.56 | 1.28  | 2.133 |                        |
| 4.88 | -0.28 | 2.755 | Ig-like C2-type 3      |
| N/A  | 0.13  | 4.718 | Ig-like C2-type 3      |
| 2.01 | 1.54  | 5.405 | Ig-like C2-type 5      |
| N/A  | -0.19 | 2.927 |                        |
| N/A  | -0.76 | 2.699 | VWFD                   |
| N/A  | 0.19  | 5.349 |                        |
| N/A  | 3.15  | 1.923 | G8                     |
| N/A  | 7.31  | 3.252 |                        |
| 3.92 | -0.34 | 3.322 |                        |
| 0.85 | -0.63 | 1.506 |                        |
| 1.04 | 3.2   | 2.711 |                        |
| N/A  | -0.7  | 3.744 | Sema                   |
| 1.07 | 0.67  | 2.542 | IPT/TIG 2              |
| 3.44 | -0.36 | 3.815 |                        |
| N/A  | 0.96  | 3.459 |                        |
| 8.13 | 0.75  | 4.657 | EGF-like 30            |
| 1.59 | 4.38  | 2.025 |                        |
| 0.26 | 0.31  | 4.235 |                        |
| 2.71 | -0.05 | 3.121 |                        |
| 9.23 | 4     | 3.437 |                        |
| N/A  | -0.33 | 3.066 | Sema                   |
| 4.54 | 6.55  | 4.349 | Sema                   |
| N/A  | -0.4  | 2.817 |                        |
| N/A  | -4.82 | 3.61  |                        |
| N/A  | 0.9   | 2.771 |                        |
| N/A  | -0.43 | 1.757 |                        |
| N/A  | -0.43 | 5.059 |                        |
| 0.09 | 4.96  | 4.449 | LDL-receptor class A 1 |
| 0.28 | -0.16 | 3.06  | Ig-like 2              |
| 1.16 | -0.49 | 1.658 | Ig-like 2              |
| N/A  | -0.49 | 2.211 |                        |

0.51  
8.00

9.44  
-0.04

3.883  
1.837

| <b>Domain Range</b> | <b>Annotation</b>                                                   |
|---------------------|---------------------------------------------------------------------|
|                     | ANO9_HUMAN Anoctamin-9                                              |
|                     | K132L_HUMAN UPF0577 protein KIAA1324-like                           |
| 74-166              | CA233_HUMAN Fibronectin type-III domain-containing transmembrane pr |
|                     | LPP1_HUMAN Lipid phosphate phosphohydrolase 1                       |
| 220-456             | ADA10_HUMAN Disintegrin and metalloproteinase domain-containing pro |
| 147-265             | NRP1_HUMAN Neuropilin-1                                             |
| 431-583             | NRP1_HUMAN Neuropilin-1                                             |
| 20-466              | PLXB2_HUMAN Plexin-B2                                               |
|                     | PLXB2_HUMAN Plexin-B2                                               |
|                     | PLXB2_HUMAN Plexin-B2                                               |
| 803-893             | PLXB2_HUMAN Plexin-B2                                               |
| 983-1092            | PLXB2_HUMAN Plexin-B2                                               |
|                     | LAMA5_HUMAN Laminin subunit alpha-5                                 |
|                     | LAMA5_HUMAN Laminin subunit alpha-5                                 |
| 2941-3115           | LAMA5_HUMAN Laminin subunit alpha-5                                 |
| 150-242             | TMPS2_HUMAN Transmembrane protease serine 2                         |
| 208-297             | NCAM2_HUMAN Neural cell adhesion molecule 2                         |
| 401-491             | NCAM2_HUMAN Neural cell adhesion molecule 2                         |
| 498-591             | NCAM2_HUMAN Neural cell adhesion molecule 2                         |
| 1252-1375           | PLXB1_HUMAN Plexin-B1                                               |
|                     | GPR39_HUMAN G-protein coupled receptor 39                           |
|                     | LPP2_HUMAN Lipid phosphate phosphohydrolase 2                       |
| 27-141              | MPZL2_HUMAN Myelin protein zero-like protein 2                      |
|                     | TLR2_HUMAN Toll-like receptor 2                                     |
|                     | TSN3_HUMAN Tetraspanin-3                                            |
|                     | H2B1K_HUMAN Histone H2B type 1-K                                    |
|                     | RAMP3_HUMAN Receptor activity-modifying protein 3                   |
| 20-138              | IGSF3_HUMAN Immunoglobulin superfamily member 3                     |
| 545-661             | IGSF3_HUMAN Immunoglobulin superfamily member 3                     |
| 676-803             | IGSF3_HUMAN Immunoglobulin superfamily member 3                     |
| 813-945             | IGSF3_HUMAN Immunoglobulin superfamily member 3                     |
| 813-945             | IGSF3_HUMAN Immunoglobulin superfamily member 3                     |
| 949-1097            | IGSF3_HUMAN Immunoglobulin superfamily member 3                     |
| 19-129              | ICOSL_HUMAN ICOS ligand                                             |
| 19-129              | ICOSL_HUMAN ICOS ligand                                             |
| 1063-1108           | ATRN_HUMAN Attractin                                                |
| 1063-1108           | ATRN_HUMAN Attractin                                                |
|                     | TSN9_HUMAN Tetraspanin-9                                            |
|                     | S22A5_HUMAN Solute carrier family 22 member 5                       |
|                     | S22A5_HUMAN Solute carrier family 22 member 5                       |

|         |                                                                     |
|---------|---------------------------------------------------------------------|
|         | ACL6B_HUMAN Actin-like protein 6B                                   |
|         | PRS23_HUMAN Serine protease 23                                      |
|         | S1PR2_HUMAN Sphingosine 1-phosphate receptor 2                      |
|         | CSPG5_HUMAN Chondroitin sulfate proteoglycan 5                      |
| 33-126  | LYPD3_HUMAN Ly6/PLAUR domain-containing protein 3                   |
| 140-222 | LYPD3_HUMAN Ly6/PLAUR domain-containing protein 3                   |
|         | LYPD3_HUMAN Ly6/PLAUR domain-containing protein 3                   |
| 36-146  | MPZL1_HUMAN Myelin protein zero-like protein 1                      |
|         | TSN13_HUMAN Tetraspanin-13                                          |
|         | TSN15_HUMAN Tetraspanin-15                                          |
|         | 1A02_HUMAN HLA class I histocompatibility antigen, A-2 alpha chain  |
| 223-313 | TFR1_HUMAN Transferrin receptor protein 1                           |
|         | TFR1_HUMAN Transferrin receptor protein 1                           |
|         | PRIo_HUMAN Major prion protein                                      |
|         | G3P_HUMAN Glyceraldehyde-3-phosphate dehydrogenase                  |
|         | G3P_HUMAN Glyceraldehyde-3-phosphate dehydrogenase                  |
|         | ERBB2_HUMAN Receptor tyrosine-protein kinase erbB-2                 |
|         | AT1B1_HUMAN Sodium/potassium-transporting ATPase subunit beta-1     |
|         | AT1B1_HUMAN Sodium/potassium-transporting ATPase subunit beta-1     |
|         | AT1B1_HUMAN Sodium/potassium-transporting ATPase subunit beta-1     |
| 128-193 | ICAM1_HUMAN Intercellular adhesion molecule 1                       |
| 230-297 | ICAM1_HUMAN Intercellular adhesion molecule 1                       |
| 140-378 | ITB1_HUMAN Integrin beta-1                                          |
|         | ITB1_HUMAN Integrin beta-1                                          |
| 853-947 | INSR_HUMAN Insulin receptor                                         |
|         | AGAL_HUMAN Alpha-galactosidase A                                    |
| 35-144  | CEAM5_HUMAN Carcinoembryonic antigen-related cell adhesion molecule |
| 146-237 | CEAM5_HUMAN Carcinoembryonic antigen-related cell adhesion molecule |
| 238-322 | CEAM5_HUMAN Carcinoembryonic antigen-related cell adhesion molecule |
| 325-415 | CEAM5_HUMAN Carcinoembryonic antigen-related cell adhesion molecule |
| 502-593 | CEAM5_HUMAN Carcinoembryonic antigen-related cell adhesion molecule |
| 594-677 | CEAM5_HUMAN Carcinoembryonic antigen-related cell adhesion molecule |
|         | ITAV_HUMAN Integrin alpha-V                                         |
| 79-407  | CATD_HUMAN_contaminant Cathepsin D                                  |
| 59-142  | SAP_HUMAN Prosaposin                                                |
|         | IGF1R_HUMAN Insulin-like growth factor 1 receptor                   |
| 735-828 | IGF1R_HUMAN Insulin-like growth factor 1 receptor                   |

834-927 IGF1R\_HUMAN Insulin-like growth factor 1 receptor  
 834-927 IGF1R\_HUMAN Insulin-like growth factor 1 receptor  
 35-96 DAF\_HUMAN Complement decay-accelerating factor  
 4F2\_HUMAN 4F2 cell-surface antigen heavy chain  
 4F2\_HUMAN 4F2 cell-surface antigen heavy chain  
 4F2\_HUMAN 4F2 cell-surface antigen heavy chain  
 NEP\_HUMAN Neprilysin  
 NEP\_HUMAN Neprilysin  
 ITA5\_HUMAN Integrin alpha-5  
 ITA5\_HUMAN Integrin alpha-5  
 ITA5\_HUMAN Integrin alpha-5  
 70-145 TACD2\_HUMAN Tumor-associated calcium signal transducer 2  
 TACD2\_HUMAN Tumor-associated calcium signal transducer 2  
 TACD2\_HUMAN Tumor-associated calcium signal transducer 2  
 918-1010 PTPRF\_HUMAN Receptor-type tyrosine-protein phosphatase F  
 CLUS\_HUMAN Clusterin  
 CLUS\_HUMAN Clusterin  
 983-1030 LAMC1\_HUMAN Laminin subunit gamma-1  
 GTR1\_HUMAN Solute carrier family 2, facilitated glucose transporter mem  
 LAMP1\_HUMAN Lysosome-associated membrane glycoprotein 1  
 255-357 FGFR1\_HUMAN Fibroblast growth factor receptor 1  
 MPRI\_HUMAN Cation-independent mannose-6-phosphate receptor  
 ACE\_HUMAN Angiotensin-converting enzyme  
 ACE\_HUMAN Angiotensin-converting enzyme  
 LAMP2\_HUMAN Lysosome-associated membrane glycoprotein 2  
 26-108 CD59\_HUMAN CD59 glycoprotein  
 24-139 PVR\_HUMAN Poliovirus receptor  
 INGR1\_HUMAN Interferon gamma receptor 1  
 32-120 CD44\_HUMAN CD44 antigen  
 ITB4\_HUMAN Integrin beta-4  
 63-135 EPCAM\_HUMAN Epithelial cell adhesion molecule  
 63-135 EPCAM\_HUMAN Epithelial cell adhesion molecule

|         |                                                                     |
|---------|---------------------------------------------------------------------|
| 32-126  | INAR1_HUMAN Interferon alpha/beta receptor 1                        |
| 127-227 | INAR1_HUMAN Interferon alpha/beta receptor 1                        |
|         | ITA2_HUMAN Integrin alpha-2                                         |
| 188-365 | ITA2_HUMAN Integrin alpha-2                                         |
|         | ITA2_HUMAN Integrin alpha-2                                         |
|         | ITA2_HUMAN Integrin alpha-2                                         |
|         | ITB6_HUMAN Integrin beta-6                                          |
|         | LFA3_HUMAN Lymphocyte function-associated antigen 3                 |
|         | MPRD_HUMAN Cation-dependent mannose-6-phosphate receptor            |
|         | MPRD_HUMAN Cation-dependent mannose-6-phosphate receptor            |
|         | 5NTD_HUMAN 5'-nucleotidase                                          |
|         | 5NTD_HUMAN 5'-nucleotidase                                          |
|         | ERBB3_HUMAN Receptor tyrosine-protein kinase erbB-3                 |
|         | ERBB3_HUMAN Receptor tyrosine-protein kinase erbB-3                 |
|         | CD9_HUMAN CD9 antigen                                               |
| 547-650 | CADH3_HUMAN Cadherin-3                                              |
|         | ENPP1_HUMAN Ectonucleotide pyrophosphatase/phosphodiesterase family |
|         | ENPP1_HUMAN Ectonucleotide pyrophosphatase/phosphodiesterase family |
|         | ENPP1_HUMAN Ectonucleotide pyrophosphatase/phosphodiesterase family |
|         | ITA6_HUMAN Integrin alpha-6                                         |
|         | TNR6_HUMAN Tumor necrosis factor receptor superfamily member 6      |
|         | TNR6_HUMAN Tumor necrosis factor receptor superfamily member 6      |
|         | ITA3_HUMAN Integrin alpha-3                                         |
|         | ITB8_HUMAN Integrin beta-8                                          |
|         | CD82_HUMAN CD82 antigen                                             |
| 435-530 | EPHB2_HUMAN Ephrin type-B receptor 2                                |
|         | 1B15_HUMAN HLA class I histocompatibility antigen, B-15 alpha chain |
|         | CTR1_HUMAN High affinity cationic amino acid transporter 1          |
|         | CTR1_HUMAN High affinity cationic amino acid transporter 1          |
|         | CALCR_HUMAN Calcitonin receptor                                     |
| 240-328 | L1CAM_HUMAN Neural cell adhesion molecule L1                        |
| 615-712 | L1CAM_HUMAN Neural cell adhesion molecule L1                        |
| 814-916 | L1CAM_HUMAN Neural cell adhesion molecule L1                        |
|         | GPC1_HUMAN Glypican-1                                               |
| 138-219 | BASI_HUMAN Basigin                                                  |
| 221-315 | BASI_HUMAN Basigin                                                  |
| 221-315 | BASI_HUMAN Basigin                                                  |
|         | TNR3_HUMAN Tumor necrosis factor receptor superfamily member 3      |
| 26-120  | IL6RB_HUMAN Interleukin-6 receptor subunit beta                     |

125-216 IL6RB\_HUMAN Interleukin-6 receptor subunit beta  
 ECE1\_HUMAN Endothelin-converting enzyme 1  
 64-115 CD97\_HUMAN CD97 antigen  
 CD97\_HUMAN CD97 antigen  
 SERPH\_HUMAN Serpin H1  
 363-411 BCAM\_HUMAN Basal cell adhesion molecule  
 CLCN5\_HUMAN H(+)/Cl(-) exchange transporter 5  
 20-488 PLXA3\_HUMAN Plexin-A3  
 CTR2\_HUMAN Low affinity cationic amino acid transporter 2  
 30-169 EFNA3\_HUMAN Ephrin-A3  
 39-92 PTTG\_HUMAN Pituitary tumor-transforming gene 1 protein-interacting pro  
 AT1B3\_HUMAN Sodium/potassium-transporting ATPase subunit beta-3  
 LAMB2\_HUMAN Laminin subunit beta-2  
 LAMB2\_HUMAN Laminin subunit beta-2  
 GFRA1\_HUMAN GDNF family receptor alpha-1  
 GFRA1\_HUMAN GDNF family receptor alpha-1  
 GFRA1\_HUMAN GDNF family receptor alpha-1  
 CLD12\_HUMAN Claudin-12  
 185-229 JAG1\_HUMAN Protein jagged-1  
 ADA17\_HUMAN Disintegrin and metalloproteinase domain-containing pro  
 223-474 ADA17\_HUMAN Disintegrin and metalloproteinase domain-containing pro  
 475-563 ADA17\_HUMAN Disintegrin and metalloproteinase domain-containing pro  
 128-226 I13R1\_HUMAN Interleukin-13 receptor subunit alpha-1  
 80-191 PGBM\_HUMAN Basement membrane-specific heparan sulfate proteoglycar  
 356-471 DSC2\_HUMAN Desmocollin-2  
 580-694 DSC2\_HUMAN Desmocollin-2  
 115-213 UPAR\_HUMAN Urokinase plasminogen activator surface receptor  
 26-63 NOTC2\_HUMAN Neurogenic locus notch homolog protein 2  
 LRP1\_HUMAN Prolow-density lipoprotein receptor-related protein 1  
 LRP1\_HUMAN Prolow-density lipoprotein receptor-related protein 1  
 3332-3371 LRP1\_HUMAN Prolow-density lipoprotein receptor-related protein 1  
 4340-4375 LRP1\_HUMAN Prolow-density lipoprotein receptor-related protein 1  
 281-387 PCDH1\_HUMAN Protocadherin-1  
 23-111 I10R2\_HUMAN Interleukin-10 receptor subunit beta  
 114-216 I10R2\_HUMAN Interleukin-10 receptor subunit beta  
 19-127 CD47\_HUMAN Leukocyte surface antigen CD47

19-127 CD47\_HUMAN Leukocyte surface antigen CD47  
 457-541 PTPRJ\_HUMAN Receptor-type tyrosine-protein phosphatase eta  
 31-120 PTK7\_HUMAN Inactive tyrosine-protein kinase 7  
 225-317 PTK7\_HUMAN Inactive tyrosine-protein kinase 7  
 309-407 PTK7\_HUMAN Inactive tyrosine-protein kinase 7  
 723-831 PTPRS\_HUMAN Receptor-type tyrosine-protein phosphatase S  
 S39A6\_HUMAN Zinc transporter ZIP6  
 S39A6\_HUMAN Zinc transporter ZIP6  
 213-414 ADA15\_HUMAN Disintegrin and metalloproteinase domain-containing pro  
 53-91 TPBG\_HUMAN Trophoblast glycoprotein  
 TPBG\_HUMAN Trophoblast glycoprotein  
 TPBG\_HUMAN Trophoblast glycoprotein  
 28-120 CD166\_HUMAN CD166 antigen  
 125-234 CD166\_HUMAN CD166 antigen  
 245-328 CD166\_HUMAN CD166 antigen  
 245-328 CD166\_HUMAN CD166 antigen  
 333-409 CD166\_HUMAN CD166 antigen  
 416-501 CD166\_HUMAN CD166 antigen  
 416-501 CD166\_HUMAN Isoform 2 of CD166 antigen  
 SPTN1\_HUMAN Spectrin alpha chain, non-erythrocytic 1  
 50-160 DSG2\_HUMAN Desmoglein-2  
 161-273 DSG2\_HUMAN Desmoglein-2  
 389-503 DSG2\_HUMAN Desmoglein-2  
 S29A2\_HUMAN Equilibrative nucleoside transporter 2  
 240-327 GPNMB\_HUMAN Transmembrane glycoprotein NMB  
 S39AE\_HUMAN Zinc transporter ZIP14  
 31-141 PVRL1\_HUMAN Poliovirus receptor-related protein 1  
 149-238 PVRL1\_HUMAN Poliovirus receptor-related protein 1  
 247-334 PVRL1\_HUMAN Poliovirus receptor-related protein 1  
 392-488 PTPRK\_HUMAN Receptor-type tyrosine-protein phosphatase kappa  
 392-488 PTPRK\_HUMAN Receptor-type tyrosine-protein phosphatase kappa  
 ERBB4\_HUMAN Receptor tyrosine-protein kinase erbB-4  
 ERBB4\_HUMAN Receptor tyrosine-protein kinase erbB-4  
 AAAT\_HUMAN Neutral amino acid transporter B(0)  
 EFNB3\_HUMAN Ephrin-B3  
 VAS1\_HUMAN V-type proton ATPase subunit S1  
 28-237 SYPL1\_HUMAN Synaptophysin-like protein 1  
 207-296 MICB\_HUMAN MHC class I polypeptide-related sequence B  
 MICA\_HUMAN MHC class I polypeptide-related sequence A  
 MICA\_HUMAN MHC class I polypeptide-related sequence A  
 207-296 MICA\_HUMAN MHC class I polypeptide-related sequence A  
 207-296 MICA\_HUMAN MHC class I polypeptide-related sequence A  
 CC50B\_HUMAN Cell cycle control protein 50B

|           |                                                                        |
|-----------|------------------------------------------------------------------------|
|           | CC50B_HUMAN Cell cycle control protein 50B                             |
|           | CC50B_HUMAN Cell cycle control protein 50B                             |
|           | F174B_HUMAN Membrane protein FAM174B                                   |
|           | ANO6_HUMAN Anoctamin-6                                                 |
|           | ANO6_HUMAN Anoctamin-6                                                 |
|           | NADL2_HUMAN Inactive N-acetylated-alpha-linked acidic dipeptidase-like |
|           | NADL2_HUMAN Inactive N-acetylated-alpha-linked acidic dipeptidase-like |
| 496-585   | SDK2_HUMAN Protein sidekick-2                                          |
| 897-991   | SDK2_HUMAN Protein sidekick-2                                          |
|           | MKS3_HUMAN Meckelin                                                    |
|           | ENTP8_HUMAN Ectonucleoside triphosphate diphosphohydrolase 8           |
| 2118-2220 | FREM2_HUMAN FRAS1-related extracellular matrix protein 2               |
| 228-443   | CAHD1_HUMAN VWFA and cache domain-containing protein 1                 |
| 29-139    | CD276_HUMAN CD276 antigen                                              |
| 29-139    | CD276_HUMAN CD276 antigen                                              |
| 145-238   | CD276_HUMAN CD276 antigen                                              |
| 243-357   | CD276_HUMAN CD276 antigen                                              |
|           | STEA3_HUMAN Metalloreductase STEAP3                                    |
|           | VASN_HUMAN Vasorin                                                     |
|           | RET1G_HUMAN Retinoic acid early transcript 1G protein                  |
|           | CNNM4_HUMAN Metal transporter CNNM4                                    |
|           | CNNM4_HUMAN Metal transporter CNNM4                                    |
|           | SE6L2_HUMAN Seizure 6-like protein 2                                   |
|           | NPNT_HUMAN Nephronectin                                                |
|           | CD109_HUMAN CD109 antigen                                              |
|           | CD109_HUMAN CD109 antigen                                              |
| 676-737   | THSD4_HUMAN Thrombospondin type-1 domain-containing protein 4          |
|           | TMM26_HUMAN Transmembrane protein 26                                   |
| 1704-1800 | SDK1_HUMAN Protein sidekick-1                                          |
| 41-149    | GP126_HUMAN G-protein coupled receptor 126                             |
|           | GP126_HUMAN G-protein coupled receptor 126                             |
|           | OSTM1_HUMAN Osteopetrosis-associated transmembrane protein 1           |
|           | CTL2_HUMAN Choline transporter-like protein 2                          |
|           | LRC8A_HUMAN Leucine-rich repeat-containing protein 8A                  |
|           | SULF2_HUMAN Extracellular sulfatase Sulf-2                             |
|           | SULF2_HUMAN Extracellular sulfatase Sulf-2                             |
| 311-404   | VSI10_HUMAN V-set and immunoglobulin domain-containing protein 10      |
|           | PROM2_HUMAN Prominin-2                                                 |
| 147-237   | FGRL1_HUMAN Fibroblast growth factor receptor-like 1                   |
| 589-677   | IGSF1_HUMAN Immunoglobulin superfamily member 1                        |
| 1161-1242 | IGSF1_HUMAN Immunoglobulin superfamily member 1                        |
| 41-150    | DCBD1_HUMAN Discoidin, CUB and LCCL domain-containing protein 1        |
| 67-175    | RNF149_HUMAN E3 ubiquitin-protein ligase RNF149                        |

|             |                                                                       |
|-------------|-----------------------------------------------------------------------|
|             | CNNM3_HUMAN Metal transporter CNNM3                                   |
| 21-119      | CADM4_HUMAN Cell adhesion molecule 4                                  |
| 454-563     | PCD19_HUMAN Protocadherin-19                                          |
|             | CTL1_HUMAN Choline transporter-like protein 1                         |
|             | LIPH_HUMAN Lipase member H                                            |
| 12368-12504 | MUC16_HUMAN Mucin-16                                                  |
|             | PIEZ1_HUMAN Piezo-type mechanosensitive ion channel component 1       |
|             | PIEZ1_HUMAN Piezo-type mechanosensitive ion channel component 1       |
|             | NICA_HUMAN Nicastrin                                                  |
|             | NICA_HUMAN Nicastrin                                                  |
|             | NICA_HUMAN Nicastrin                                                  |
| 141-235     | NRCAM_HUMAN Neuronal cell adhesion molecule                           |
| 267-356     | NRCAM_HUMAN Neuronal cell adhesion molecule                           |
| 848-950     | NRCAM_HUMAN Neuronal cell adhesion molecule                           |
| 954-1051    | NRCAM_HUMAN Neuronal cell adhesion molecule                           |
| 22-500      | SEM4D_HUMAN Semaphorin-4D                                             |
|             | CA159_HUMAN Uncharacterized protein C1orf159                          |
|             | TM87B_HUMAN Transmembrane protein 87B                                 |
|             | PCFT_HUMAN Proton-coupled folate transporter                          |
| 248-331     | PVRL4_HUMAN Poliovirus receptor-related protein 4                     |
|             | MYCT_HUMAN Proton myo-inositol cotransporter                          |
|             | PANX1_HUMAN Pannexin-1                                                |
|             | SORT_HUMAN Sortilin                                                   |
|             | P2RX4_HUMAN P2X purinoceptor 4                                        |
|             | TM2D3_HUMAN TM2 domain-containing protein 3                           |
| 295-382     | LRFN3_HUMAN Leucine-rich repeat and fibronectin type-III domain-conta |
| 45-139      | CADM1_HUMAN Cell adhesion molecule 1                                  |
| 45-139      | CADM1_HUMAN Cell adhesion molecule 1                                  |
| 30-497      | SEM4C_HUMAN Semaphorin-4C                                             |
| 30-497      | SEM4C_HUMAN Semaphorin-4C                                             |
| 499-551     | SEM4C_HUMAN Semaphorin-4C                                             |
| 47-175      | MAGT1_HUMAN Magnesium transporter protein 1                           |
|             | ITFG3_HUMAN Protein ITFG3                                             |
|             | ITFG3_HUMAN Protein ITFG3                                             |
|             | S12A5_HUMAN Solute carrier family 12 member 5                         |
| 44-215      | ANTR1_HUMAN Anthrax toxin receptor 1                                  |
|             | CNNM2_HUMAN Metal transporter CNNM2                                   |
| 365-469     | PCDH9_HUMAN Protocadherin-9                                           |
|             | NCKX3_HUMAN Sodium/potassium/calcium exchanger 3                      |
|             | TMM8A_HUMAN Transmembrane protein 8A                                  |
| 1028-1146   | CELR2_HUMAN Cadherin EGF LAG seven-pass G-type receptor 2             |
| 1028-1146   | CELR2_HUMAN Cadherin EGF LAG seven-pass G-type receptor 2             |
| 1367-1571   | CELR2_HUMAN Cadherin EGF LAG seven-pass G-type receptor 2             |

|           |                                                                         |
|-----------|-------------------------------------------------------------------------|
| 1614-1971 | CELR2_HUMAN Cadherin EGF LAG seven-pass G-type receptor 2               |
| 1883-1922 | CELR2_HUMAN Cadherin EGF LAG seven-pass G-type receptor 2               |
|           | CELR2_HUMAN Cadherin EGF LAG seven-pass G-type receptor 2               |
|           | CELR2_HUMAN Cadherin EGF LAG seven-pass G-type receptor 2               |
|           | APMAP_HUMAN Adipocyte plasma membrane-associated protein                |
| 21-128    | IL1AP_HUMAN Interleukin-1 receptor accessory protein                    |
| 42-518    | SEM4B_HUMAN Semaphorin-4B                                               |
|           | CC50A_HUMAN Cell cycle control protein 50A                              |
| 1442-1646 | CELR1_HUMAN Cadherin EGF LAG seven-pass G-type receptor 1               |
|           | CELR1_HUMAN Cadherin EGF LAG seven-pass G-type receptor 1               |
|           | FLRT3_HUMAN Leucine-rich repeat transmembrane protein FLRT3             |
|           | JKAMP_HUMAN JNK1/MAPK8-associated membrane protein                      |
| 276-394   | FPRP_HUMAN Prostaglandin F2 receptor negative regulator                 |
| 276-394   | FPRP_HUMAN Prostaglandin F2 receptor negative regulator                 |
| 544-662   | FPRP_HUMAN Prostaglandin F2 receptor negative regulator                 |
|           | SUSD2_HUMAN Sushi domain-containing protein 2                           |
| 446-667   | SUSD2_HUMAN Sushi domain-containing protein 2                           |
|           | PCYOX_HUMAN Prenylcysteine oxidase 1                                    |
| 121-245   | TMEM2_HUMAN Transmembrane protein 2                                     |
|           | SO3A1_HUMAN Solute carrier organic anion transporter family member 3A   |
| 27-512    | PLXA1_HUMAN Plexin-A1                                                   |
| 961-104   | PLXA1_HUMAN Plexin-A1                                                   |
|           | S39AA_HUMAN Zinc transporter ZIP10                                      |
|           | HEG1_HUMAN Protein HEG homolog 1                                        |
| 1160-1203 | NOTC3_HUMAN Neurogenic locus notch homolog protein 3                    |
|           | S6A14_HUMAN Sodium- and chloride-dependent neutral and basic amino acid |
|           | S6A14_HUMAN Sodium- and chloride-dependent neutral and basic amino acid |
|           | S6A14_HUMAN Sodium- and chloride-dependent neutral and basic amino acid |
|           | FZD1_HUMAN Frizzled-1                                                   |
| 47-546    | PLXD1_HUMAN Plexin-D1                                                   |
| 47-546    | PLXD1_HUMAN Plexin-D1                                                   |
|           | PLXD1_HUMAN Plexin-D1                                                   |
|           | HYOU1_HUMAN Hypoxia up-regulated protein 1                              |
|           | HYOU1_HUMAN Hypoxia up-regulated protein 1                              |
|           | HYOU1_HUMAN Hypoxia up-regulated protein 1                              |
|           | ENTP2_HUMAN Ectonucleoside triphosphate diphosphohydrolase 2            |
| 452-487   | ST14_HUMAN Suppressor of tumorigenicity 14 protein                      |
| 148-235   | NPTN_HUMAN Neuroplastin                                                 |
| 148-235   | NPTN_HUMAN Neuroplastin                                                 |
|           | GPR56_HUMAN G-protein coupled receptor 56                               |

S4A7\_HUMAN Sodium bicarbonate cotransporter 3

S4A7\_HUMAN Sodium bicarbonate cotransporter 3

otein C1orf233

tein 10

ε 5  
ε 5  
ε 5  
ε 5  
ε 5  
ε 5

ber 1

/ member 1  
/ member 1  
/ member 1

tein

tein 17

tein 17

tein 17

1 core protein

tein 15

ε protein 2  
ε protein 2

ining protein 3

A1

acid transporter B(0+)

acid transporter B(0+)

acid transporter B(0+)

**Table S9 - The Half-Lives of 248 Quantif**

| <b>Uniprot ID</b> | <b>Gene Symbol</b> | <b>Half-Life in Expt# 1 (h)</b> |
|-------------------|--------------------|---------------------------------|
| A1A5B4            | ANO9               | 14.59                           |
| A8MWY0            | KIAA1324L          | N/A                             |
| F2Z333            | C1orf233           | 20.43                           |
| O00592            | PODXL              | N/A                             |
| O14494            | PPAP2A             | 113.14                          |
| O14672            | ADAM10             | 22.42                           |
| O14786            | NRP1               | 5.16                            |
| O15031            | PLXNB2             | 15.80                           |
| O15230            | LAMA5              | 17.65                           |
| O15393            | TMPRSS2            | 11.90                           |
| O15394            | NCAM2              | 103.25                          |
| O15455            | TLR3               | N/A                             |
| O43157            | PLXNB1             | 19.91                           |
| O43194            | GPR39              | 40.55                           |
| O43688            | PPAP2C             | N/A                             |
| O60487            | MPZL2              | 14.10                           |
| O60603            | TLR2               | 14.92                           |
| O60637            | TSPAN3             | 10.82                           |
| O60814            | HIST1H2BK          | N/A                             |
| O60896            | RAMP3              | 18.74                           |
| O75054            | IGSF3              | 21.46                           |
| O75144            | ICOSLG             | 108.24                          |
| O75882            | ATRN               | 41.99                           |
| O75954            | TSPAN9             | 8.77                            |
| O76082            | SLC22A5            | 39.80                           |
| O94805            | ACTL6B             | >200                            |
| O95084            | PRSS23             | 19.51                           |
| O95136            | S1PR2              | 28.67                           |
| O95196            | CSPG5              | N/A                             |
| O95274            | LYPD3              | 5.05                            |
| O95297            | MPZL1              | 5.36                            |
| O95857            | TSPAN13            | 10.39                           |
| O95858            | TSPAN15            | 16.32                           |
| P01892            | HLA-A              | 25.61                           |
| P02786            | TFRC               | 20.39                           |
| P04156            | PRNP               | 13.70                           |
| P04406            | GAPDH              | >200                            |
| P04626            | ERBB2              | >200                            |
| P05026            | ATP1B1             | 23.11                           |
| P05362            | ICAM1              | 22.68                           |

|        |          |        |
|--------|----------|--------|
| P05556 | ITGB1    | 20.62  |
| P06213 | INSR     | 16.05  |
| P06280 | GLA      | N/A    |
| P06731 | CEACAM5  | 17.88  |
| P06756 | ITGAV    | 14.52  |
| P07339 | CTSD     | >200   |
| P07602 | PSAP     | 11.90  |
| P08069 | IGF1R    | 11.46  |
| P08174 | CD55     | >200   |
| P08195 | SLC3A2   | 29.26  |
| P08473 | MME      | 94.42  |
| P08648 | ITGA5    | 19.86  |
| P08962 | CD63     | 22.60  |
| P09758 | TACSTD2  | 12.77  |
| P10586 | PTPRF    | 7.18   |
| P10909 | CLU      | 9.55   |
| P11047 | LAMC1    | 4.88   |
| P11166 | SLC2A1   | 15.74  |
| P11279 | LAMP1    | 124.11 |
| P11362 | FGFR1    | 5.47   |
| P11717 | IGF2R    | 14.86  |
| P12821 | ACE      | >200   |
| P13473 | LAMP2    | >200   |
| P13987 | CD59     | N/A    |
| P15151 | PVR      | 58.65  |
| P15260 | IFNGR1   | 3.75   |
| P16070 | CD44     | 11.29  |
| P16144 | ITGB4    | 19.90  |
| P16422 | EPCAM    | 16.40  |
| P17181 | IFNAR1   | 10.44  |
| P17301 | ITGA2    | 27.76  |
| P18564 | ITGB6    | 9.93   |
| P19256 | CD58     | 21.71  |
| P19438 | TNFRSF1A | N/A    |
| P20645 | M6PR     | 133.12 |
| P21589 | NT5E     | 26.08  |
| P21802 | FGFR2    | N/A    |
| P21860 | ERBB3    | 4.61   |
| P21926 | CD9      | N/A    |
| P22223 | CDH3     | 2.97   |
| P22413 | ENPP1    | 25.21  |
| P23229 | ITGA6    | 17.83  |
| P25106 | ACKR3    | 3.03   |

|        |          |        |
|--------|----------|--------|
| P25445 | FAS      | 45.16  |
| P26006 | ITGA3    | 35.32  |
| P26012 | ITGB8    | 6.99   |
| P27701 | CD82     | >200   |
| P27824 | CANX     | >200   |
| P29323 | EPHB2    | 20.83  |
| P30464 | HLA-B    | 11.61  |
| P30825 | SLC7A1   | 18.67  |
| P30988 | CALCR    | >200   |
| P32004 | L1CAM    | 11.29  |
| P35052 | GPC1     | 28.39  |
| P35613 | BSG      | 14.41  |
| P36941 | LTBR     | >200   |
| P40189 | IL6ST    | 15.88  |
| P42892 | ECE1     | 23.97  |
| P48509 | CD151    | 111.12 |
| P48960 | CD97     | 16.49  |
| P50454 | SERPINH1 | 17.10  |
| P50895 | BCAM     | 8.42   |
| P51795 | CLCN5    | 45.32  |
| P51805 | PLXNA3   | >200   |
| P52569 | SLC7A2   | 6.49   |
| P52797 | EFNA3    | 10.41  |
| P53801 | PTTG1IP  | 15.51  |
| P54709 | ATP1B3   | 64.66  |
| P55011 | SLC12A2  | N/A    |
| P55268 | LAMB2    | 13.13  |
| P56159 | GFRA1    | 7.32   |
| P56749 | CLDN12   | N/A    |
| P78504 | JAG1     | 8.15   |
| P78536 | ADAM17   | 115.34 |
| P78552 | IL13RA1  | N/A    |
| P98160 | HSPG2    | >200   |
| Q02487 | DSC2     | 15.54  |
| Q03405 | PLAUR    | 16.55  |
| Q04721 | NOTCH2   | 32.02  |
| Q07954 | LRP1     | 19.49  |
| Q08174 | PCDH1    | N/A    |
| Q08334 | IL10RB   | 5.03   |
| Q08722 | CD47     | 92.40  |
| Q12913 | PTPRJ    | 106.28 |
| Q13308 | PTK7     | 10.04  |
| Q13332 | PTPRS    | 16.10  |

|          |          |        |
|----------|----------|--------|
| Q13433   | SLC39A6  | 8.09   |
| Q13444   | ADAM15   | 29.70  |
| Q13641   | TPBG     | 14.84  |
| Q13740-2 | ALCAM    | 19.84  |
| Q13813   | SPTAN1   | N/A    |
| Q14118   | DAG1     | 19.38  |
| Q14126   | DSG2     | 12.33  |
| Q14542   | SLC29A2  | 37.04  |
| Q14956   | GPNMB    | >200   |
| Q15043   | SLC39A14 | >200   |
| Q15223   | PVRL1    | 19.84  |
| Q15262   | PTPRK    | 32.97  |
| Q15303   | ERBB4    | 12.88  |
| Q15758   | SLC1A5   | 21.40  |
| Q15768   | EFNB3    | 7.30   |
| Q15904   | ATP6AP1  | 54.41  |
| Q16563   | SYPL1    | >200   |
| Q29980   | MICB     | 6.85   |
| Q29983   | MICA     | 16.75  |
| Q3MIR4   | TMEM30B  | 39.26  |
| Q3ZCQ3   | FAM174B  | N/A    |
| Q4KMQ2   | ANO6     | 111.33 |
| Q58DX5   | NAALADL2 | 22.36  |
| Q58EX2   | SDK2     | 29.81  |
| Q5HYA8   | TMEM67   | 41.97  |
| Q5MY95   | ENTPD8   | 55.49  |
| Q5SZK8   | FREM2    | 5.60   |
| Q5VU97   | CACHD1   | 13.84  |
| Q5VW38   | GPR107   | 128.79 |
| Q5ZPR3   | CD276    | 18.59  |
| Q658P3   | STEAP3   | 18.19  |
| Q6EMK4   | VASN     | >200   |
| Q6H3X3   | RAET1G   | 12.06  |
| Q6P4Q7   | CNNM4    | 30.34  |
| Q6PCB8   | EMB      | 23.43  |
| Q6UXD5   | SEZ6L2   | 16.43  |
| Q6UXG2   | KIAA1324 | 13.76  |
| Q6UXI9   | NPNT     | 9.14   |
| Q6YHK3   | CD109    | 7.73   |
| Q6ZMP0   | THSD4    | 8.64   |
| Q6ZUK4   | TMEM26   | 14.20  |
| Q7KYR7   | BTN2A1   | 25.17  |
| Q7Z5N4   | SDK1     | 20.57  |

|        |          |        |
|--------|----------|--------|
| Q86SQ4 | GPR126   | 23.83  |
| Q86UF1 | TSPAN33  | 28.42  |
| Q86WC4 | OSTM1    | >200   |
| Q8IWA5 | SLC44A2  | 38.78  |
| Q8IWT6 | LRRC8A   | 15.63  |
| Q8IWU5 | SULF2    | 5.76   |
| Q8N0Z9 | VSIG10   | 18.72  |
| Q8N271 | PROM2    | 17.92  |
| Q8N441 | FGFRL1   | 14.68  |
| Q8N6C5 | IGSF1    | >200   |
| Q8N8Z6 | DCBLD1   | 8.96   |
| Q8NBN3 | TMEM87A  | 12.19  |
| Q8NC42 | RNF149   | >200   |
| Q8NCS7 | SLC44A5  | 137.47 |
| Q8NE01 | CNNM3    | N/A    |
| Q8NFZ8 | CADM4    | 21.49  |
| Q8TAB3 | PCDH19   | 12.49  |
| Q8TB96 | ITFG1    | 28.06  |
| Q8TCJ2 | STT3B    | N/A    |
| Q8TCT8 | SPPL2A   | 28.55  |
| Q8WTV0 | SCARB1   | 9.07   |
| Q8WWI5 | SLC44A1  | N/A    |
| Q8WWY8 | LIPH     | 18.43  |
| Q8WXI7 | MUC16    | 54.28  |
| Q92508 | PIEZO1   | 52.00  |
| Q92542 | NCSTN    | 113.46 |
| Q92823 | NRCAM    | 21.64  |
| Q92854 | SEMA4D   | 9.71   |
| Q96HA4 | C1orf159 | 32.03  |
| Q96K49 | TMEM87B  | >200   |
| Q96NT5 | SLC46A1  | 37.88  |
| Q96NY8 | PVRL4    | 27.56  |
| Q96QE2 | SLC2A13  | >200   |
| Q96RD7 | PANX1    | 70.71  |
| Q99523 | SORT1    | 7.50   |
| Q99571 | P2RX4    | 37.56  |
| Q9BRN9 | TM2D3    | N/A    |
| Q9BTN0 | LRFN3    | N/A    |
| Q9BY67 | CADM1    | 23.71  |
| Q9BZC7 | ABCA2    | 106.32 |
| Q9C0C4 | SEMA4C   | 13.40  |
| Q9H0U3 | MAGT1    | 34.72  |
| Q9H0X4 | ITFG3    | 14.20  |

|          |          |       |
|----------|----------|-------|
| Q9H2X9   | SLC12A5  | N/A   |
| Q9H6X2   | ANTXR1   | N/A   |
| Q9H8M5   | CNNM2    | 17.08 |
| Q9HC56   | PCDH9    | 11.28 |
| Q9HC58   | SLC24A3  | N/A   |
| Q9HCN3   | TMEM8A   | 23.49 |
| Q9HCU4   | CELSR2   | 9.55  |
| Q9HDC9   | APMAP    | 11.16 |
| Q9NPH3   | IL1RAP   | 13.93 |
| Q9NPR2   | SEMA4B   | 19.13 |
| Q9NV96   | TMEM30A  | N/A   |
| Q9NYQ6   | CELSR1   | 7.51  |
| Q9NZU0   | FLRT3    | N/A   |
| Q9P055   | JKAMP    | 12.68 |
| Q9P0K1   | ADAM22   | 33.22 |
| Q9P2B2   | PTGFRN   | 10.55 |
| Q9UGT4   | SUSD2    | 32.01 |
| Q9UHG3   | PCYOX1   | 13.76 |
| Q9UHN6   | TMEM2    | 21.68 |
| Q9UHW9   | SLC12A6  | 17.57 |
| Q9UIG8   | SLCO3A1  | 11.51 |
| Q9UIW2   | PLXNA1   | 8.09  |
| Q9UJ14   | GGT7     | 15.72 |
| Q9UJW2-2 | TINAG    | >200  |
| Q9ULF5   | SLC39A10 | 52.95 |
| Q9ULI3   | HEG1     | >200  |
| Q9UM47   | NOTCH3   | 18.68 |
| Q9UN76   | SLC6A14  | 18.89 |
| Q9UP38   | FZD1     | 21.51 |
| Q9Y4D7   | PLXND1   | 21.02 |
| Q9Y4L1   | HYOU1    | 15.53 |
| Q9Y5L3   | ENTPD2   | 9.36  |
| Q9Y5Y6   | ST14     | 9.68  |
| Q9Y639   | NPTN     | 19.94 |
| Q9Y653   | GPR56    | N/A   |
| Q9Y6M7   | SLC4A7   | 26.56 |

## ied Cell-Surface N-Glycoproteins

| Half-Life in Expt# 2 (h) | Median Half-Life (h) | Standard Deviation |
|--------------------------|----------------------|--------------------|
| N/A                      | 14.59                | N/A                |
| 150.64                   | 150.64               | N/A                |
| N/A                      | 20.43                | N/A                |
| 16.66                    | 16.66                | N/A                |
| N/A                      | 113.14               | N/A                |
| 21.55                    | 21.98                | 0.62               |
| 5.52                     | 5.34                 | 0.25               |
| 11.72                    | 13.76                | 2.88               |
| 17.94                    | 17.79                | 0.21               |
| N/A                      | 11.90                | N/A                |
| 113.18                   | 108.21               | 7.02               |
| >200                     | >200                 | N/A                |
| 13.34                    | 16.62                | 4.65               |
| N/A                      | 40.55                | N/A                |
| 48.15                    | 48.15                | N/A                |
| 12.45                    | 13.28                | 1.17               |
| N/A                      | 14.92                | N/A                |
| 11.02                    | 10.92                | 0.14               |
| >200                     | >200                 | N/A                |
| 17.05                    | 17.90                | 1.20               |
| 16.49                    | 18.98                | 3.51               |
| 108.18                   | 108.21               | 0.04               |
| 49.95                    | 45.97                | 5.63               |
| 23.66                    | 16.22                | 10.53              |
| 30.88                    | 35.34                | 6.31               |
| N/A                      | >200                 | N/A                |
| 17.00                    | 18.26                | 1.77               |
| 29.24                    | 28.95                | 0.40               |
| 19.88                    | 19.88                | N/A                |
| 5.57                     | 5.31                 | 0.37               |
| 5.92                     | 5.64                 | 0.40               |
| 9.53                     | 9.96                 | 0.61               |
| 7.97                     | 12.14                | 5.90               |
| 18.24                    | 21.93                | 5.21               |
| 16.29                    | 18.34                | 2.90               |
| 13.87                    | 13.79                | 0.12               |
| >200                     | >200                 | N/A                |
| >200                     | >200                 | N/A                |
| 21.55                    | 22.33                | 1.10               |
| 22.40                    | 22.54                | 0.20               |

|        |        |       |
|--------|--------|-------|
| 27.76  | 24.19  | 5.05  |
| 23.14  | 19.60  | 5.01  |
| >200   | >200   | N/A   |
| 18.14  | 18.01  | 0.18  |
| 14.97  | 14.75  | 0.32  |
| N/A    | >200   | N/A   |
| N/A    | 11.90  | N/A   |
| 13.76  | 12.61  | 1.63  |
| >200   | >200   | N/A   |
| 25.05  | 27.15  | 2.98  |
| 68.10  | 81.26  | 18.61 |
| 19.79  | 19.82  | 0.05  |
| 25.73  | 24.16  | 2.21  |
| 21.29  | 17.03  | 6.02  |
| 5.55   | 6.37   | 1.15  |
| 11.79  | 10.67  | 1.58  |
| 7.44   | 6.16   | 1.81  |
| 14.86  | 15.30  | 0.62  |
| 110.17 | 117.14 | 9.86  |
| N/A    | 5.47   | N/A   |
| 13.40  | 14.13  | 1.03  |
| >200   | >200   | N/A   |
| >200   | >200   | N/A   |
| 15.28  | 15.28  | N/A   |
| N/A    | 58.65  | N/A   |
| 3.35   | 3.55   | 0.28  |
| N/A    | 11.29  | N/A   |
| 21.76  | 20.83  | 1.32  |
| 12.51  | 14.46  | 2.75  |
| 10.00  | 10.22  | 0.31  |
| 18.19  | 22.98  | 6.77  |
| N/A    | 9.93   | N/A   |
| 15.96  | 18.83  | 4.07  |
| 8.23   | 8.23   | N/A   |
| 128.98 | 131.05 | 2.93  |
| 21.86  | 23.97  | 2.98  |
| 154.81 | 154.81 | N/A   |
| 5.07   | 4.84   | 0.33  |
| 61.73  | 61.73  | N/A   |
| 3.02   | 2.99   | 0.04  |
| 20.08  | 22.64  | 3.63  |
| 24.83  | 21.33  | 4.95  |
| 2.66   | 2.85   | 0.26  |

|        |        |       |
|--------|--------|-------|
| 33.06  | 39.11  | 8.56  |
| 39.22  | 37.27  | 2.76  |
| 7.12   | 7.05   | 0.09  |
| N/A    | >200   | N/A   |
| N/A    | >200   | N/A   |
| 19.04  | 19.93  | 1.27  |
| 7.42   | 9.52   | 2.96  |
| 13.01  | 15.84  | 4.00  |
| >200   | >200   | N/A   |
| 15.57  | 13.43  | 3.03  |
| 32.71  | 30.55  | 3.05  |
| 13.43  | 13.92  | 0.69  |
| N/A    | >200   | N/A   |
| 14.75  | 15.31  | 0.80  |
| 21.88  | 22.93  | 1.48  |
| N/A    | 111.12 | N/A   |
| 9.91   | 13.20  | 4.65  |
| 17.86  | 17.48  | 0.54  |
| 6.66   | 7.54   | 1.24  |
| 48.00  | 46.66  | 1.90  |
| >200   | >200   | N/A   |
| 5.50   | 6.00   | 0.70  |
| 10.82  | 10.61  | 0.29  |
| 16.31  | 15.91  | 0.57  |
| 57.59  | 61.12  | 5.00  |
| 18.14  | 18.14  | N/A   |
| 17.31  | 15.22  | 2.96  |
| 8.95   | 8.13   | 1.15  |
| 13.72  | 13.72  | N/A   |
| 5.59   | 6.87   | 1.81  |
| 110.05 | 112.70 | 3.74  |
| 62.41  | 62.41  | N/A   |
| >200   | >200   | N/A   |
| 18.68  | 17.11  | 2.22  |
| 17.75  | 17.15  | 0.85  |
| 42.57  | 37.30  | 7.46  |
| 15.91  | 17.70  | 2.53  |
| 30.30  | 30.30  | N/A   |
| 5.67   | 5.35   | 0.45  |
| 73.50  | 82.95  | 13.36 |
| 108.82 | 107.55 | 1.80  |
| 17.89  | 13.97  | 5.55  |
| 15.91  | 16.01  | 0.13  |

|        |        |       |
|--------|--------|-------|
| 8.74   | 8.42   | 0.46  |
| 16.97  | 23.33  | 9.00  |
| 12.47  | 13.66  | 1.68  |
| 17.67  | 18.76  | 1.53  |
| 42.04  | 42.04  | N/A   |
| 21.02  | 20.20  | 1.16  |
| 9.70   | 11.02  | 1.86  |
| 23.13  | 30.08  | 9.84  |
| >200   | >200   | N/A   |
| >200   | >200   | N/A   |
| 19.83  | 19.84  | 0.01  |
| 11.04  | 22.01  | 15.51 |
| 10.95  | 11.91  | 1.36  |
| 17.25  | 19.32  | 2.93  |
| 7.37   | 7.33   | 0.05  |
| 63.40  | 58.90  | 6.36  |
| >200   | >200   | N/A   |
| N/A    | 6.85   | N/A   |
| 32.18  | 24.47  | 10.91 |
| 35.57  | 37.41  | 2.61  |
| 19.35  | 19.35  | N/A   |
| 106.38 | 108.85 | 3.50  |
| 15.11  | 18.73  | 5.13  |
| 24.69  | 27.25  | 3.62  |
| N/A    | 41.97  | N/A   |
| 58.53  | 57.01  | 2.15  |
| N/A    | 5.60   | N/A   |
| 16.12  | 14.98  | 1.61  |
| 117.19 | 122.99 | 8.20  |
| 19.46  | 19.02  | 0.62  |
| 20.07  | 19.13  | 1.33  |
| >200   | >200   | N/A   |
| 13.72  | 12.89  | 1.17  |
| 28.55  | 29.44  | 1.27  |
| 13.76  | 18.60  | 6.84  |
| N/A    | 16.43  | N/A   |
| N/A    | 13.76  | N/A   |
| 9.83   | 9.49   | 0.49  |
| 9.08   | 8.40   | 0.95  |
| 8.93   | 8.79   | 0.21  |
| 24.29  | 19.24  | 7.13  |
| 25.45  | 25.31  | 0.20  |
| 13.65  | 17.11  | 4.89  |

|        |        |       |
|--------|--------|-------|
| 105.95 | 64.89  | 58.07 |
| 23.64  | 26.03  | 3.38  |
| N/A    | >200   | N/A   |
| 45.60  | 42.19  | 4.82  |
| 15.53  | 15.58  | 0.07  |
| 6.72   | 6.24   | 0.68  |
| 13.47  | 16.09  | 3.71  |
| 23.39  | 20.66  | 3.87  |
| N/A    | 14.68  | N/A   |
| 152.98 | 176.49 | N/A   |
| 11.42  | 10.19  | 1.74  |
| 13.76  | 12.98  | 1.11  |
| >200   | >200   | N/A   |
| N/A    | 137.47 | N/A   |
| 8.72   | 8.72   | N/A   |
| 23.78  | 22.64  | 1.62  |
| 9.30   | 10.90  | 2.26  |
| 14.85  | 21.46  | 9.34  |
| 40.00  | 40.00  | N/A   |
| 48.79  | 38.67  | 14.31 |
| 10.00  | 9.53   | 0.66  |
| >200   | >200   | N/A   |
| 12.79  | 15.61  | 3.99  |
| 60.27  | 57.27  | 4.24  |
| 30.34  | 41.17  | 15.32 |
| 104.02 | 108.74 | 6.68  |
| 26.85  | 24.25  | 3.68  |
| 8.24   | 8.97   | 1.04  |
| 23.40  | 27.72  | 6.10  |
| >200   | >200   | N/A   |
| 24.60  | 31.24  | 9.39  |
| N/A    | 27.56  | N/A   |
| >200   | >200   | N/A   |
| 125.85 | 98.28  | 38.99 |
| 7.51   | 7.51   | 0.01  |
| 28.87  | 33.22  | 6.14  |
| >200   | >200   | N/A   |
| 76.67  | 76.67  | N/A   |
| N/A    | 23.71  | N/A   |
| 105.68 | 106.00 | 0.45  |
| 14.99  | 14.19  | 1.12  |
| 18.33  | 26.52  | 11.59 |
| 15.52  | 14.86  | 0.93  |

|        |        |      |
|--------|--------|------|
| 25.94  | 25.94  | N/A  |
| 17.81  | 17.81  | N/A  |
| 13.74  | 15.41  | 2.36 |
| 12.36  | 11.82  | 0.76 |
| >200   | >200   | N/A  |
| 31.04  | 27.27  | 5.34 |
| 9.12   | 9.34   | 0.30 |
| 14.24  | 12.70  | 2.18 |
| 16.14  | 15.04  | 1.56 |
| 20.12  | 19.62  | 0.70 |
| 13.11  | 13.11  | N/A  |
| 8.42   | 7.97   | 0.64 |
| 105.95 | 105.95 | N/A  |
| 7.65   | 10.16  | 3.56 |
| N/A    | 33.22  | N/A  |
| 9.41   | 9.98   | 0.81 |
| 38.10  | 35.05  | 4.31 |
| 21.61  | 17.68  | 5.55 |
| 15.44  | 18.56  | 4.41 |
| 27.75  | 22.66  | 7.20 |
| 10.04  | 10.78  | 1.04 |
| 7.12   | 7.60   | 0.69 |
| N/A    | 15.72  | N/A  |
| N/A    | >200   | N/A  |
| 57.82  | 55.39  | 3.44 |
| N/A    | >200   | N/A  |
| 7.18   | 12.93  | 8.13 |
| 21.25  | 20.07  | 1.67 |
| N/A    | 21.51  | N/A  |
| 14.79  | 17.91  | 4.41 |
| 10.77  | 13.15  | 3.37 |
| 8.99   | 9.17   | 0.26 |
| 9.81   | 9.74   | 0.09 |
| 30.75  | 25.35  | 7.64 |
| 3.60   | 3.60   | N/A  |
| 20.55  | 23.56  | 4.25 |

| <b>Unique Glycopeptide Hits</b> | <b>Annotation</b>                                            |
|---------------------------------|--------------------------------------------------------------|
| 1                               | ANO9_HUMAN Anoctamin-9                                       |
| 1                               | K132L_HUMAN UPF0577 protein KIAA1324-like                    |
| 1                               | CA233_HUMAN Fibronectin type-III domain-containing transmem  |
| 1                               | PODXL_HUMAN Podocalyxin                                      |
| 2                               | LPP1_HUMAN Lipid phosphate phosphohydrolase 1                |
| 1                               | ADA10_HUMAN Disintegrin and metalloproteinase domain-conta   |
| 2                               | NRP1_HUMAN Neuropilin-1                                      |
| 7                               | PLXB2_HUMAN Plexin-B2                                        |
| 2                               | LAMA5_HUMAN Laminin subunit alpha-5                          |
| 1                               | TMPS2_HUMAN Transmembrane protease serine 2                  |
| 4                               | NCAM2_HUMAN Neural cell adhesion molecule 2                  |
| 1                               | TLR3_HUMAN Toll-like receptor 3                              |
| 1                               | PLXB1_HUMAN Plexin-B1                                        |
| 1                               | GPR39_HUMAN G-protein coupled receptor 39                    |
| 1                               | LPP2_HUMAN Lipid phosphate phosphohydrolase 2                |
| 1                               | MPZL2_HUMAN Myelin protein zero-like protein 2               |
| 1                               | TLR2_HUMAN Toll-like receptor 2                              |
| 2                               | TSN3_HUMAN Tetraspanin-3                                     |
| 1                               | H2B1K_HUMAN Histone H2B type 1-K                             |
| 1                               | RAMP3_HUMAN Receptor activity-modifying protein 3            |
| 6                               | IGSF3_HUMAN Immunoglobulin superfamily member 3              |
| 2                               | ICOSL_HUMAN ICOS ligand                                      |
| 3                               | ATRN_HUMAN Attractin                                         |
| 2                               | TSN9_HUMAN Tetraspanin-9                                     |
| 2                               | S22A5_HUMAN Solute carrier family 22 member 5                |
| 1                               | ACL6B_HUMAN Actin-like protein 6B                            |
| 2                               | PRS23_HUMAN Serine protease 23                               |
| 1                               | S1PR2_HUMAN Sphingosine 1-phosphate receptor 2               |
| 1                               | CSPG5_HUMAN Chondroitin sulfate proteoglycan 5               |
| 3                               | LYPD3_HUMAN Ly6/PLAUR domain-containing protein 3            |
| 1                               | MPZL1_HUMAN Myelin protein zero-like protein 1               |
| 1                               | TSN13_HUMAN Tetraspanin-13                                   |
| 2                               | TSN15_HUMAN Tetraspanin-15                                   |
| 1                               | 1A02_HUMAN HLA class I histocompatibility antigen, A-2 alpha |
| 5                               | TFR1_HUMAN Transferrin receptor protein 1                    |
| 2                               | PRIO_HUMAN Major prion protein                               |
| 2                               | G3P_HUMAN Glyceraldehyde-3-phosphate dehydrogenase           |
| 2                               | ERBB2_HUMAN Receptor tyrosine-protein kinase erbB-2          |
| 4                               | AT1B1_HUMAN Sodium/potassium-transporting ATPase subunit     |
| 3                               | ICAM1_HUMAN Intercellular adhesion molecule 1                |

|    |             |                                                      |
|----|-------------|------------------------------------------------------|
| 12 | ITB1_HUMAN  | Integrin beta-1                                      |
| 1  | INSR_HUMAN  | Insulin receptor                                     |
| 1  | AGAL_HUMAN  | Alpha-galactosidase A                                |
| 7  | CEAM5_HUMAN | Carcinoembryonic antigen-related cell adhesion       |
| 6  | ITAV_HUMAN  | Integrin alpha-V                                     |
| 1  | CATD_HUMAN  | Cathepsin D                                          |
| 1  | SAP_HUMAN   | Prosaposin                                           |
| 7  | IGF1R_HUMAN | Insulin-like growth factor 1 receptor                |
| 2  | DAF_HUMAN   | Complement decay-accelerating factor                 |
| 4  | 4F2_HUMAN   | 4F2 cell-surface antigen heavy chain                 |
| 1  | NEP_HUMAN   | Nepriylsin                                           |
| 4  | ITA5_HUMAN  | Integrin alpha-5                                     |
| 1  | CD63_HUMAN  | CD63 antigen                                         |
| 7  | TACD2_HUMAN | Tumor-associated calcium signal transducer 2         |
| 2  | PTPRF_HUMAN | Receptor-type tyrosine-protein phosphatase F         |
| 2  | CLUS_HUMAN  | Clusterin                                            |
| 4  | LAMC1_HUMAN | Laminin subunit gamma-1                              |
| 1  | GTR1_HUMAN  | Solute carrier family 2, facilitated glucose transpo |
| 4  | LAMP1_HUMAN | Lysosome-associated membrane glycoprotein 1          |
| 1  | FGFR1_HUMAN | Fibroblast growth factor receptor 1                  |
| 1  | MPRI_HUMAN  | Cation-independent mannose-6-phosphate recepto       |
| 2  | ACE_HUMAN   | Angiotensin-converting enzyme                        |
| 4  | LAMP2_HUMAN | Lysosome-associated membrane glycoprotein 2          |
| 1  | CD59_HUMAN  | CD59 glycoprotein                                    |
| 1  | PVR_HUMAN   | Poliovirus receptor                                  |
| 1  | INGR1_HUMAN | Interferon gamma receptor 1                          |
| 3  | CD44_HUMAN  | CD44 antigen                                         |
| 1  | ITB4_HUMAN  | Integrin beta-4                                      |
| 3  | EPCAM_HUMAN | Epithelial cell adhesion molecule                    |
| 2  | INAR1_HUMAN | Interferon alpha/beta receptor 1                     |
| 5  | ITA2_HUMAN  | Integrin alpha-2                                     |
| 1  | ITB6_HUMAN  | Integrin beta-6                                      |
| 2  | LFA3_HUMAN  | Lymphocyte function-associated antigen 3             |
| 1  | TNR1A_HUMAN | Tumor necrosis factor receptor superfamily men       |
| 2  | MPRD_HUMAN  | Cation-dependent mannose-6-phosphate receptor        |
| 3  | 5NTD_HUMAN  | 5'-nucleotidase                                      |
| 1  | FGFR2_HUMAN | Fibroblast growth factor receptor 2                  |
| 3  | ERBB3_HUMAN | Receptor tyrosine-protein kinase erbB-3              |
| 1  | CD9_HUMAN   | CD9 antigen                                          |
| 1  | CADH3_HUMAN | Cadherin-3                                           |
| 4  | ENPP1_HUMAN | Ectonucleotide pyrophosphatase/phosphodiesterase     |
| 2  | ITA6_HUMAN  | Integrin alpha-6                                     |
| 1  | ACKR3_HUMAN | Atypical chemokine receptor 3                        |

1 TNR6\_HUMAN Tumor necrosis factor receptor superfamily memb  
6 ITA3\_HUMAN Integrin alpha-3  
1 ITB8\_HUMAN Integrin beta-8  
1 CD82\_HUMAN CD82 antigen  
1 CALX\_HUMAN Calnexin  
1 EPHB2\_HUMAN Ephrin type-B receptor 2  
1 1B15\_HUMAN HLA class I histocompatibility antigen, B-15 alpha  
2 CTR1\_HUMAN High affinity cationic amino acid transporter 1  
2 CALCR\_HUMAN Calcitonin receptor  
3 L1CAM\_HUMAN Neural cell adhesion molecule L1  
1 GPC1\_HUMAN Glypican-1  
5 BASI\_HUMAN Basigin  
1 TNR3\_HUMAN Tumor necrosis factor receptor superfamily memb  
3 IL6RB\_HUMAN Interleukin-6 receptor subunit beta  
12 ECE1\_HUMAN Endothelin-converting enzyme 1  
2 CD151\_HUMAN CD151 antigen  
5 CD97\_HUMAN CD97 antigen  
1 SERPH\_HUMAN Serpin H1  
1 BCAM\_HUMAN Basal cell adhesion molecule  
2 CLCN5\_HUMAN H(+)/Cl(-) exchange transporter 5  
1 PLXA3\_HUMAN Plexin-A3  
1 CTR2\_HUMAN Low affinity cationic amino acid transporter 2  
1 EFNA3\_HUMAN Ephrin-A3  
1 PTTG\_HUMAN Pituitary tumor-transforming gene 1 protein-intera  
4 AT1B3\_HUMAN Sodium/potassium-transporting ATPase subunit  
1 S12A2\_HUMAN Solute carrier family 12 member 2  
1 LAMB2\_HUMAN Laminin subunit beta-2  
5 GFRA1\_HUMAN GDNF family receptor alpha-1  
1 CLD12\_HUMAN Claudin-12  
1 JAG1\_HUMAN Protein jagged-1  
5 ADA17\_HUMAN Disintegrin and metalloproteinase domain-conta  
1 I13R1\_HUMAN Interleukin-13 receptor subunit alpha-1  
1 PGBM\_HUMAN Basement membrane-specific heparan sulfate pro  
1 DSC2\_HUMAN Desmocollin-2  
1 UPAR\_HUMAN Urokinase plasminogen activator surface receptor  
1 NOTC2\_HUMAN Neurogenic locus notch homolog protein 2  
4 LRP1\_HUMAN Prolow-density lipoprotein receptor-related proteir  
1 PCDH1\_HUMAN Protocadherin-1  
1 I10R2\_HUMAN Interleukin-10 receptor subunit beta  
3 CD47\_HUMAN Leukocyte surface antigen CD47  
4 PTPRJ\_HUMAN Receptor-type tyrosine-protein phosphatase eta  
3 PTK7\_HUMAN Inactive tyrosine-protein kinase 7  
1 PTPRS\_HUMAN Receptor-type tyrosine-protein phosphatase S

5 S39A6\_HUMAN Zinc transporter ZIP6  
2 ADA15\_HUMAN Disintegrin and metalloproteinase domain-conta  
4 TPBG\_HUMAN Trophoblast glycoprotein  
13 CD166\_HUMAN Isoform 2 of CD166 antigen  
1 SPTN1\_HUMAN Spectrin alpha chain, non-erythrocytic 1  
2 DAG1\_HUMAN Dystroglycan  
2 DSG2\_HUMAN Desmoglein-2  
1 S29A2\_HUMAN Equilibrative nucleoside transporter 2  
1 GPNMB\_HUMAN Transmembrane glycoprotein NMB  
1 S39AE\_HUMAN Zinc transporter ZIP14  
4 PVRL1\_HUMAN Poliovirus receptor-related protein 1  
3 PTPRK\_HUMAN Receptor-type tyrosine-protein phosphatase kapp  
2 ERBB4\_HUMAN Receptor tyrosine-protein kinase erbB-4  
2 AAAT\_HUMAN Neutral amino acid transporter B(0)  
1 EFNB3\_HUMAN Ephrin-B3  
1 VAS1\_HUMAN V-type proton ATPase subunit S1  
1 SYPL1\_HUMAN Synaptophysin-like protein 1  
1 MICB\_HUMAN MHC class I polypeptide-related sequence B  
5 MICA\_HUMAN MHC class I polypeptide-related sequence A  
3 CC50B\_HUMAN Cell cycle control protein 50B  
1 F174B\_HUMAN Membrane protein FAM174B  
2 ANO6\_HUMAN Anoctamin-6  
3 NADL2\_HUMAN Inactive N-acetylated-alpha-linked acidic dipept  
1 SDK2\_HUMAN Protein sidekick-2  
1 MKS3\_HUMAN Meckelin  
1 ENTP8\_HUMAN Ectonucleoside triphosphate diphosphohydrolase  
1 FREM2\_HUMAN FRAS1-related extracellular matrix protein 2  
1 CAHD1\_HUMAN VWFA and cache domain-containing protein 1  
1 GP107\_HUMAN Protein GPR107  
5 CD276\_HUMAN CD276 antigen  
1 STEA3\_HUMAN Metalloreductase STEAP3  
1 VASN\_HUMAN Vasorin  
1 RET1G\_HUMAN Retinoic acid early transcript 1G protein  
3 CNNM4\_HUMAN Metal transporter CNNM4  
1 EMB\_HUMAN Embigin  
1 SE6L2\_HUMAN Seizure 6-like protein 2  
1 K1324\_HUMAN UPF0577 protein KIAA1324  
1 NPNT\_HUMAN Nephronectin  
2 CD109\_HUMAN CD109 antigen  
1 THSD4\_HUMAN Thrombospondin type-1 domain-containing prot  
1 TMM26\_HUMAN Transmembrane protein 26  
1 BT2A1\_HUMAN Butyrophilin subfamily 2 member A1  
2 SDK1\_HUMAN Protein sidekick-1

3 GP126\_HUMAN G-protein coupled receptor 126  
1 TSN33\_HUMAN Tetraspanin-33  
1 OSTM1\_HUMAN Osteopetrosis-associated transmembrane protein  
7 CTL2\_HUMAN Choline transporter-like protein 2  
1 LRC8A\_HUMAN Leucine-rich repeat-containing protein 8A  
1 SULF2\_HUMAN Extracellular sulfatase Sulf-2  
1 VSI10\_HUMAN V-set and immunoglobulin domain-containing pro  
1 PROM2\_HUMAN Prominin-2  
1 FGRL1\_HUMAN Fibroblast growth factor receptor-like 1  
1 IGSF1\_HUMAN Immunoglobulin superfamily member 1  
1 DCBD1\_HUMAN Discoidin, CUB and LCCL domain-containing p  
1 TM87A\_HUMAN Transmembrane protein 87A  
1 RN149\_HUMAN E3 ubiquitin-protein ligase RNF149  
1 CTL5\_HUMAN Choline transporter-like protein 5  
1 CNNM3\_HUMAN Metal transporter CNNM3  
2 CADM4\_HUMAN Cell adhesion molecule 4  
1 PCD19\_HUMAN Protocadherin-19  
1 TIP\_HUMAN T-cell immunomodulatory protein  
1 STT3B\_HUMAN Dolichyl-diphosphooligosaccharide--protein glyco  
1 SPP2A\_HUMAN Signal peptide peptidase-like 2A  
1 SCRB1\_HUMAN Scavenger receptor class B member 1  
1 CTL1\_HUMAN Choline transporter-like protein 1  
1 LIPH\_HUMAN Lipase member H  
1 MUC16\_HUMAN Mucin-16  
4 PIEZ1\_HUMAN Piezo-type mechanosensitive ion channel compon  
4 NICA\_HUMAN Nicastrin  
5 NRCAM\_HUMAN Neuronal cell adhesion molecule  
1 SEM4D\_HUMAN Semaphorin-4D  
2 CA159\_HUMAN Uncharacterized protein C1orf159  
1 TM87B\_HUMAN Transmembrane protein 87B  
1 PCFT\_HUMAN Proton-coupled folate transporter  
1 PVRL4\_HUMAN Poliovirus receptor-related protein 4  
1 MYCT\_HUMAN Proton myo-inositol cotransporter  
1 PANX1\_HUMAN Pannexin-1  
1 SORT\_HUMAN Sortilin  
1 P2RX4\_HUMAN P2X purinoceptor 4  
1 TM2D3\_HUMAN TM2 domain-containing protein 3  
1 LRFN3\_HUMAN Leucine-rich repeat and fibronectin type-III dom  
2 CADM1\_HUMAN Cell adhesion molecule 1  
1 ABCA2\_HUMAN ATP-binding cassette sub-family A member 2  
5 SEM4C\_HUMAN Semaphorin-4C  
1 MAGT1\_HUMAN Magnesium transporter protein 1  
2 ITFG3\_HUMAN Protein ITFG3

3 S12A5\_HUMAN Solute carrier family 12 member 5  
1 ANTR1\_HUMAN Anthrax toxin receptor 1  
1 CNNM2\_HUMAN Metal transporter CNNM2  
1 PCDH9\_HUMAN Protocadherin-9  
1 NCKX3\_HUMAN Sodium/potassium/calcium exchanger 3  
2 TMM8A\_HUMAN Transmembrane protein 8A  
9 CELR2\_HUMAN Cadherin EGF LAG seven-pass G-type receptor  
1 APMAP\_HUMAN Adipocyte plasma membrane-associated protein  
1 IL1AP\_HUMAN Interleukin-1 receptor accessory protein  
1 SEM4B\_HUMAN Semaphorin-4B  
1 CC50A\_HUMAN Cell cycle control protein 50A  
4 CELR1\_HUMAN Cadherin EGF LAG seven-pass G-type receptor  
1 FLRT3\_HUMAN Leucine-rich repeat transmembrane protein FLRT3  
1 JKAMP\_HUMAN JNK1/MAPK8-associated membrane protein  
2 ADA22\_HUMAN Disintegrin and metalloproteinase domain-containing protein 22  
5 FPRP\_HUMAN Prostaglandin F2 receptor negative regulator  
3 SUSD2\_HUMAN Sushi domain-containing protein 2  
2 PCYOX\_HUMAN Prenylcysteine oxidase 1  
5 TMEM2\_HUMAN Transmembrane protein 2  
1 S12A6\_HUMAN Solute carrier family 12 member 6  
1 SO3A1\_HUMAN Solute carrier organic anion transporter family member 3A1  
3 PLXA1\_HUMAN Plexin-A1  
1 GGT7\_HUMAN Gamma-glutamyltransferase 7  
1 TINAG\_HUMAN Isoform 2 of Tubulointerstitial nephritis antigen  
1 S39AA\_HUMAN Zinc transporter ZIP10  
1 HEG1\_HUMAN Protein HEG homolog 1  
1 NOTC3\_HUMAN Neurogenic locus notch homolog protein 3  
4 S6A14\_HUMAN Sodium- and chloride-dependent neutral and basic amino acid transporter 14  
1 FZD1\_HUMAN Frizzled-1  
3 PLXD1\_HUMAN Plexin-D1  
4 HYOU1\_HUMAN Hypoxia up-regulated protein 1  
1 ENTP2\_HUMAN Ectonucleoside triphosphate diphosphohydrolase 2  
1 ST14\_HUMAN Suppressor of tumorigenicity 14 protein  
14 NPTN\_HUMAN Neuroplastin  
1 GPR56\_HUMAN G-protein coupled receptor 56  
2 S4A7\_HUMAN Sodium bicarbonate cotransporter 3

lbrane protein C1orf233

ining protein 10

chain

beta-1

molecule 5

member 1

r

member 1A

family member 1

er 6

chain

er 3

cting protein  
beta-3

ining protein 17

teoglycan core protein

11

ining protein 15

na

idase-like protein 2

: 8

ein 4

1

protein 10

protein 1

cosyltransferase subunit STT3B

ent 1

ain-containing protein 3

2  
1

1  
Γ3

ining protein 22

ember 3A1

c amino acid transporter B(0+)

:2

**Table S10 - The Half-Lives of 62 Quantified CDs in I**

| <b>Uniprot ID</b> | <b>Gene Symbol</b> | <b>CD Name</b> | <b>Half-Life in Expt# 1 (h)</b> |
|-------------------|--------------------|----------------|---------------------------------|
| P15260            | IFNGR1             | CD119          | 3.75                            |
| O14786            | NRP1               | CD304          | 5.16                            |
| Q08334            | IL10RB             | CDw210b        | 5.03                            |
| P11362            | FGFR1              | CD331          | 5.47                            |
| P78504            | JAG1               | CD339          | 8.15                            |
| P50895            | BCAM               | CD239          | 8.42                            |
| P19438            | TNFRSF1A           | CD120a         | N/A                             |
| Q6YHK3            | CD109              | CD109          | 7.73                            |
| Q92854            | SEMA4D             | CD100          | 9.71                            |
| Q9P2B2            | PTGFRN             | CD315          | 10.55                           |
| P16070            | CD44               | CD44           | 11.29                           |
| P08069            | IGF1R              | CD221          | 11.46                           |
| P48960            | CD97               | CD97           | 16.49                           |
| P32004            | L1CAM              | CD171          | 11.29                           |
| P04156            | PRNP               | CD230          | 13.70                           |
| P35613            | BSG                | CD147          | 14.41                           |
| P11717            | IGF2R              | CD222          | 14.86                           |
| P16422            | EPCAM              | CD326          | 16.40                           |
| P06756            | ITGAV              | CD51           | 14.52                           |
| O60603            | TLR2               | CD282          | 14.92                           |
| P13987            | CD59               | CD59           | N/A                             |
| P40189            | IL6ST              | CD130          | 15.88                           |
| Q03405            | PLAUR              | CD87           | 16.55                           |
| Q07954            | LRP1               | CD91           | 19.49                           |
| P06731            | CEACAM5            | CD66e          | 17.88                           |
| P02786            | TFRC               | CD71           | 20.39                           |
| P19256            | CD58               | CD58           | 21.71                           |
| Q5ZPR3            | CD276              | CD276          | 18.59                           |
| P06213            | INSR               | CD220          | 16.05                           |
| P08648            | ITGA5              | CD49e          | 19.86                           |
| Q15223            | PVRL1              | CD111          | 19.84                           |
| P16144            | ITGB4              | CD104          | 19.90                           |
| P23229            | ITGA6              | CD49f          | 17.83                           |
| O14672            | ADAM10             | CD156c         | 22.42                           |
| P05362            | ICAM1              | CD54           | 22.68                           |
| P22413            | ENPP1              | CD203a         | 25.21                           |
| P17301            | ITGA2              | CD49b          | 27.76                           |
| P21589            | NT5E               | CD73           | 26.08                           |
| P08962            | CD63               | CD63           | 22.60                           |
| P05556            | ITGB1              | CD29           | 20.62                           |

|        |         |         |        |
|--------|---------|---------|--------|
| P08195 | SLC3A2  | CD98    | 29.26  |
| P26006 | ITGA3   | CD49c   | 35.32  |
| P25445 | FAS     | CD95    | 45.16  |
| P15151 | PVR     | CD155   | 58.65  |
| P54709 | ATP1B3  | CD298   | 64.66  |
| P21926 | CD9     | CD9     | N/A    |
| P78552 | IL13RA1 | CD213a1 | N/A    |
| P08473 | MME     | CD10    | 94.42  |
| Q08722 | CD47    | CD47    | 92.40  |
| Q12913 | PTPRJ   | CD148   | 106.28 |
| O75144 | ICOSLG  | CD275   | 108.24 |
| P48509 | CD151   | CD151   | 111.12 |
| P78536 | ADAM17  | CD156b  | 115.34 |
| P11279 | LAMP1   | CD107a  | 124.11 |
| P21802 | FGFR2   | CD332   | N/A    |
| P12821 | ACE     | CD143   | >200   |
| P08174 | CD55    | CD55    | >200   |
| P04626 | ERBB2   | CD340   | >200   |
| P13473 | LAMP2   | CD107b  | >200   |
| Q8WW15 | SLC44A1 | CD92    | N/A    |
| O15455 | TLR3    | CD283   | N/A    |
| P27701 | CD82    | CD82    | >200   |

## Expt# 1 & 2

| <b>Half-Life in Expt# 2 (h)</b> | <b>Median Half-Life (h)</b> | <b>Unique Glycopeptide Hits</b> |
|---------------------------------|-----------------------------|---------------------------------|
| 3.35                            | 3.55                        | 1                               |
| 5.52                            | 5.34                        | 2                               |
| 5.67                            | 5.35                        | 1                               |
| N/A                             | 5.47                        | 1                               |
| 5.59                            | 6.87                        | 1                               |
| 6.66                            | 7.54                        | 1                               |
| 8.23                            | 8.23                        | 1                               |
| 9.08                            | 8.40                        | 2                               |
| 8.24                            | 8.97                        | 1                               |
| 9.41                            | 9.98                        | 5                               |
| N/A                             | 11.29                       | 3                               |
| 13.76                           | 12.61                       | 7                               |
| 9.91                            | 13.20                       | 5                               |
| 15.57                           | 13.43                       | 3                               |
| 13.87                           | 13.79                       | 2                               |
| 13.43                           | 13.92                       | 5                               |
| 13.40                           | 14.13                       | 1                               |
| 12.51                           | 14.46                       | 3                               |
| 14.97                           | 14.75                       | 6                               |
| N/A                             | 14.92                       | 1                               |
| 15.28                           | 15.28                       | 1                               |
| 14.75                           | 15.31                       | 3                               |
| 17.75                           | 17.15                       | 1                               |
| 15.91                           | 17.70                       | 4                               |
| 18.14                           | 18.01                       | 7                               |
| 16.29                           | 18.34                       | 5                               |
| 15.96                           | 18.83                       | 2                               |
| 19.46                           | 19.02                       | 5                               |
| 23.14                           | 19.60                       | 1                               |
| 19.79                           | 19.82                       | 4                               |
| 19.83                           | 19.84                       | 4                               |
| 21.76                           | 20.83                       | 1                               |
| 24.83                           | 21.33                       | 2                               |
| 21.55                           | 21.98                       | 1                               |
| 22.40                           | 22.54                       | 3                               |
| 20.08                           | 22.64                       | 4                               |
| 18.19                           | 22.98                       | 5                               |
| 21.86                           | 23.97                       | 3                               |
| 25.73                           | 24.16                       | 1                               |
| 27.76                           | 24.19                       | 12                              |

|        |        |   |
|--------|--------|---|
| 25.05  | 27.15  | 4 |
| 39.22  | 37.27  | 6 |
| 33.06  | 39.11  | 1 |
| N/A    | 58.65  | 1 |
| 57.59  | 61.12  | 4 |
| 61.73  | 61.73  | 1 |
| 62.41  | 62.41  | 1 |
| 68.10  | 81.26  | 1 |
| 73.50  | 82.95  | 3 |
| 108.82 | 107.55 | 4 |
| 108.18 | 108.21 | 2 |
| N/A    | 111.12 | 2 |
| 110.05 | 112.70 | 5 |
| 110.17 | 117.14 | 4 |
| 154.81 | 154.81 | 1 |
| >200   | >200   | 2 |
| >200   | >200   | 2 |
| >200   | >200   | 2 |
| >200   | >200   | 4 |
| >200   | >200   | 1 |
| >200   | >200   | 1 |
| N/A    | >200   | 1 |

---

---

**Annotation**

---

---

INGR1\_HUMAN Interferon gamma receptor 1  
NRP1\_HUMAN Neuropilin-1  
I10R2\_HUMAN Interleukin-10 receptor subunit beta  
FGFR1\_HUMAN Fibroblast growth factor receptor 1  
JAG1\_HUMAN Protein jagged-1  
BCAM\_HUMAN Basal cell adhesion molecule  
TNFR1A\_HUMAN Tumor necrosis factor receptor superfamily member 1A  
CD109\_HUMAN CD109 antigen  
SEM4D\_HUMAN Semaphorin-4D  
FPRP\_HUMAN Prostaglandin F2 receptor negative regulator  
CD44\_HUMAN CD44 antigen  
IGF1R\_HUMAN Insulin-like growth factor 1 receptor  
CD97\_HUMAN CD97 antigen  
L1CAM\_HUMAN Neural cell adhesion molecule L1  
PRIO\_HUMAN Major prion protein  
BASI\_HUMAN Basigin  
MPRI\_HUMAN Cation-independent mannose-6-phosphate receptor  
EPCAM\_HUMAN Epithelial cell adhesion molecule  
ITAV\_HUMAN Integrin alpha-V  
TLR2\_HUMAN Toll-like receptor 2  
CD59\_HUMAN CD59 glycoprotein  
IL6RB\_HUMAN Interleukin-6 receptor subunit beta  
UPAR\_HUMAN Urokinase plasminogen activator surface receptor  
LRP1\_HUMAN Prolow-density lipoprotein receptor-related protein 1  
CEAM5\_HUMAN Carcinoembryonic antigen-related cell adhesion molecule 5  
TFR1\_HUMAN Transferrin receptor protein 1  
LFA3\_HUMAN Lymphocyte function-associated antigen 3  
CD276\_HUMAN CD276 antigen  
INSR\_HUMAN Insulin receptor  
ITA5\_HUMAN Integrin alpha-5  
PVRL1\_HUMAN Poliovirus receptor-related protein 1  
ITB4\_HUMAN Integrin beta-4  
ITA6\_HUMAN Integrin alpha-6  
ADA10\_HUMAN Disintegrin and metalloproteinase domain-containing protein 10  
ICAM1\_HUMAN Intercellular adhesion molecule 1  
ENPP1\_HUMAN Ectonucleotide pyrophosphatase/phosphodiesterase family member 1  
ITA2\_HUMAN Integrin alpha-2  
5NTD\_HUMAN 5'-nucleotidase  
CD63\_HUMAN CD63 antigen  
ITB1\_HUMAN Integrin beta-1

4F2\_HUMAN 4F2 cell-surface antigen heavy chain  
ITA3\_HUMAN Integrin alpha-3  
TNR6\_HUMAN Tumor necrosis factor receptor superfamily member 6  
PVR\_HUMAN Poliovirus receptor  
AT1B3\_HUMAN Sodium/potassium-transporting ATPase subunit beta-3  
CD9\_HUMAN CD9 antigen  
I13R1\_HUMAN Interleukin-13 receptor subunit alpha-1  
NEP\_HUMAN Neprilysin  
CD47\_HUMAN Leukocyte surface antigen CD47  
PTPRJ\_HUMAN Receptor-type tyrosine-protein phosphatase eta  
ICOSL\_HUMAN ICOS ligand  
CD151\_HUMAN CD151 antigen  
ADA17\_HUMAN Disintegrin and metalloproteinase domain-containing protein 17  
LAMP1\_HUMAN Lysosome-associated membrane glycoprotein 1  
FGFR2\_HUMAN Fibroblast growth factor receptor 2  
ACE\_HUMAN Angiotensin-converting enzyme  
DAF\_HUMAN Complement decay-accelerating factor  
ERBB2\_HUMAN Receptor tyrosine-protein kinase erbB-2  
LAMP2\_HUMAN Lysosome-associated membrane glycoprotein 2  
CTL1\_HUMAN Choline transporter-like protein 1  
TLR3\_HUMAN Toll-like receptor 3  
CD82\_HUMAN CD82 antigen

## Table S11 - The Half-Lives of Quantified Cell-Surface

| <b>Uniprot ID</b> | <b>Gene Symbol</b> | <b>Half-Lives (h) of Glycoproteins<br/>in the Current Work</b> |
|-------------------|--------------------|----------------------------------------------------------------|
| O14494            | PPAP2A             | 113.14                                                         |
| O14672            | ADAM10             | 21.98                                                          |
| O43688            | PPAP2C             | 48.15                                                          |
| P04406            | GAPDH              | >200                                                           |
| P06280            | GLA                | >200                                                           |
| P07339            | CTSD               | >200                                                           |
| P08473            | MME                | 81.26                                                          |
| P12821            | ACE                | >200                                                           |
| P21589            | NT5E               | 23.97                                                          |
| P22413            | ENPP1              | 22.64                                                          |
| P42892            | ECE1               | 22.93                                                          |
| P78536            | ADAM17             | 112.70                                                         |
| Q5MY95            | ENTPD8             | 57.01                                                          |
| Q8TCJ2            | STT3B              | 40.00                                                          |
| Q9UHG3            | PCYOX1             | 17.68                                                          |
| Q9UJ14            | GGT7               | 15.72                                                          |
| Q9Y5Y6            | ST14               | 9.74                                                           |

## ce N-Glycoproteins with (

**Half-Lives (h) of Proteins in the  
Previous Work (Ref. 59 in the text)**

---

---

10.38

8.65

7.29

# Catalytic Activities (Receptor-type tyrosine kinases)

---

## Annotation

---

---

Lipid phosphate phosphohydrolase 1  
Disintegrin and metalloproteinase domain-containing protein 10  
Lipid phosphate phosphohydrolase 2  
Glyceraldehyde-3-phosphate dehydrogenase  
Alpha-galactosidase A  
Cathepsin D (acid protease active)  
Neprilysin (metalloprotease)  
Angiotensin-converting enzyme  
5'-nucleotidase  
Ectonucleotide pyrophosphatase/phosphodiesterase family member 1  
Endothelin-converting enzyme 1  
Disintegrin and metalloproteinase domain-containing protein 17  
Ectonucleoside triphosphate diphosphohydrolase 8  
Dolichyl-diphosphooligosaccharide--protein glycosyltransferase subunit STT3B  
Prenylcysteine oxidase 1  
Gamma-glutamyltransferase 7  
Suppressor of tumorigenicity 14 protein (trypsin-like activity)
