# Supplementary material for: Quantitative investigation of human cell surface N-glycoprotein dynamics
Source: PubMed Central journal article supplement — Chem Sci. 2016 Aug 15;8(1):268–77. doi: 10.1039/c6sc01814a (PMC5458730; doi:10.1039/c6sc01814a), 2016-08-15
Supplement: SC-008-C6SC01814A-s002.pdf [file SC-008-C6SC01814A-s002.pdf]

**Supplementary Tables and Figures**

**Comprehensive and quantitative investigation of human cell surface**

**N-glycoprotein dynamics**

Haopeng Xiao, and Ronghu Wu\*

School of Chemistry and Biochemistry and the Petit Institute for Bioengineering and Bioscience,  
Georgia Institute of Technology, Atlanta, Georgia 30332, USA

\* Corresponding author: Phone: 404-385-1515; Fax: 404-894-7452.  
E-mail: ronghu.wu@chemistry.gatech.edu

**The following Supplementary Tables are in Excel format:**

**Table S1** - Unique N-Glycosylation Sites (449 Sites) Identified on 233 Surface Glycoproteins in Expt# 1

**Table S2** - Unique N-Glycosylation Sites (475 Sites) Identified on 239 Surface Glycoproteins in Expt# 2

**Table S3** - The Half-Lives of 311 Unique Glycosylation Sites in Expt# 1

**Table S4** - The Half-Lives of 318 Unique Glycosylation Sites in Expt# 2

**Table S5** - The Half-Lives of 220 Quantified Cell-Surface N-Glycoproteins in Expt# 1

**Table S6** - The Half-Lives of 216 Quantified Cell-Surface N-Glycoproteins in Expt# 2

**Table S7** - Unique N-Glycosylation Sites (545 Sites) Identified on 265 Surface Glycoproteins

**Table S8** - The Half-Lives of 386 Unique Glycosylation Sites in

**Table S9** - The Half-Lives of 248 Quantified Cell-Surface N-Glycoproteins

**Table S10** - The Half-Lives of Quantified CDs

**Table S11** - The Half-Lives of 29 Quantified Cell-Surface N-Glycoproteins with Catalytic Activities

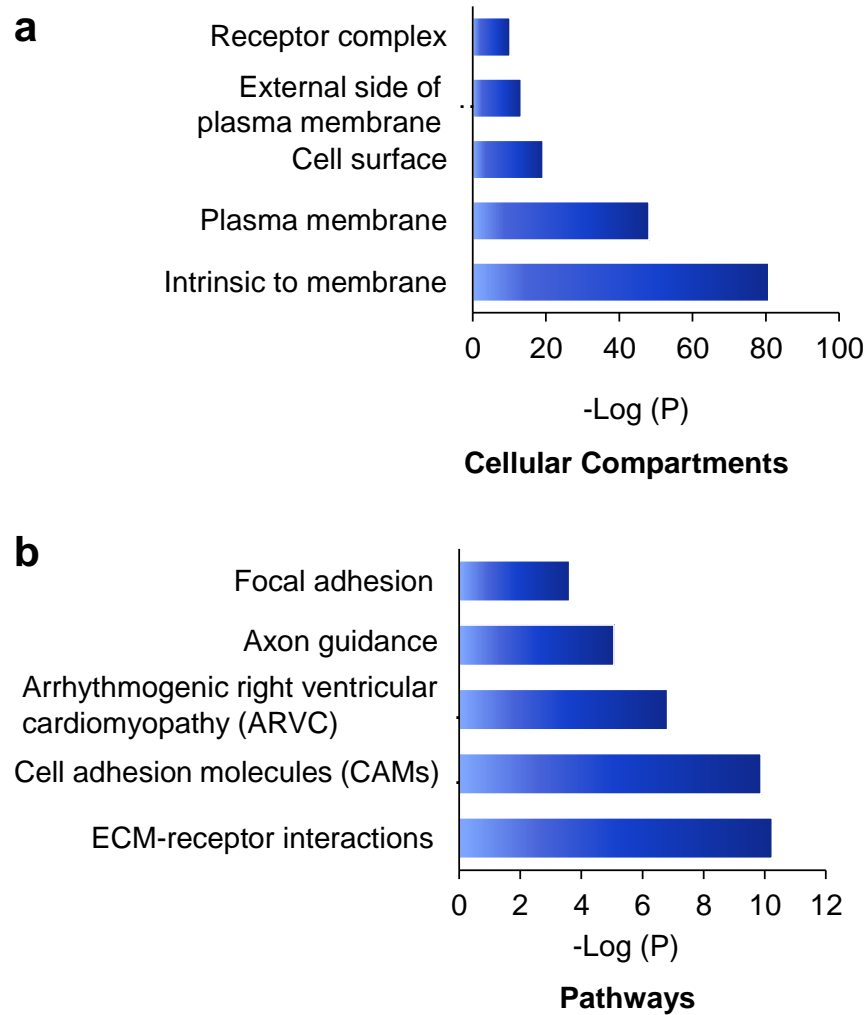

**Fig. S1** Clustering of surface glycoproteins identified in this work. **(a)** Cellular compartments, and **(b)** pathways.

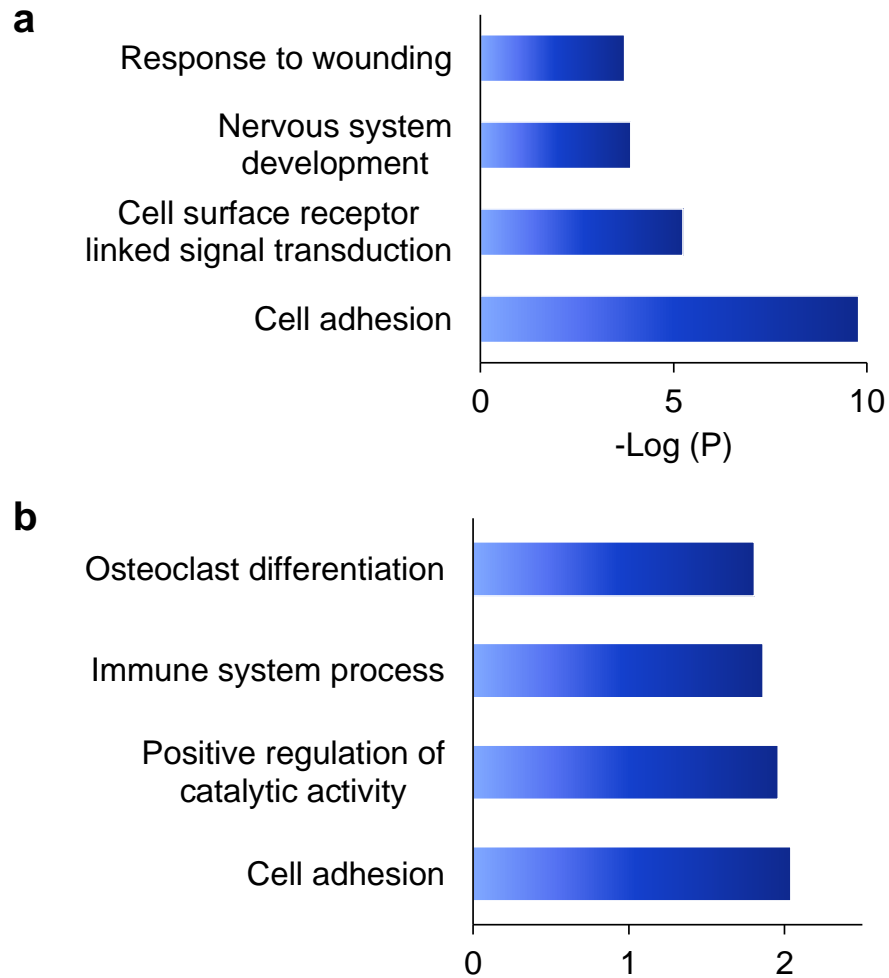

**Fig. S2** (a) Biological processes of relatively short-lived glycoproteins (half-life <10 h). (b) Biological processes of relatively long-lived glycoproteins (half-life >100 h).
